# Supplementary material for: Transcriptome Profiling of Cucumber (Cucumis sativus L.) Early Response to Pseudomonas syringae pv. lachrymans
Source: MDPI journal article supplement (doi:10.3390/ijms22084192), 2021-04-18
Supplement: s1 [file s1]

**Supplementary Table S4.** Primer sequences and description of candidate reference genes for RT-qPCR to study gene expression in cucumber inoculated with *Pseudomonas syringae* pv. *lachrymans* strain 814/98.

| No. | Abbr.         | NCBI GeneBank accession number | Gene description                        | Primer sequences (5' → 3') forward/reverse             | Reference                     |
|-----|---------------|--------------------------------|-----------------------------------------|--------------------------------------------------------|-------------------------------|
| 1   | <i>ACT</i>    | AB010922                       | <i>Actin</i>                            | CCGTTCTGTCCCTCTACGCTAGTG<br>GGAAGTCTCTTTGCACTCTCGAG    | Migocka and Papierniak (2010) |
| 2   | <i>CACS</i>   | GW881874                       | <i>Clathrin adaptor complex subunit</i> | TGGGAAGATTCTTATGAAGTGC<br>CTCGTCAAATTTACACATTGGT       | Migocka and Papierniak (2010) |
| 3   | <i>F-box</i>  | GW881870                       | <i>F-box protein/galactose oxidase</i>  | GGTTCATCTGGTGGTCTT<br>CTTTAAACGAACGGTCAGTCC            | Migocka and Papierniak (2010) |
| 4   | <i>HEL</i>    | GW881869                       | <i>Helicase</i>                         | TTCTCGAAGATTTAGTGATTTCATGTG<br>CAATGGACGAATGCAAAGG     | Migocka and Papierniak (2010) |
| 5   | <i>TIP41</i>  | GW881871                       | <i>TIP41-like family protein</i>        | CAACAGGTGATATTGGATTATGATTATAC<br>GCCAGCTCATCCTCATATAAG | Migocka and Papierniak (2010) |
| 6   | <i>TUA</i>    | AJ715498                       | $\alpha$ - Tubulin                      | ACGCTGTTGGTGGTGGTAC<br>GAGAGGGGTAAACAGTGAATC           | Wan et al. (2010)             |
| 7   | <i>TUB</i>    | –                              | $\alpha$ - Tubulin                      | CCTCGACATTGAGCGACCTAAC<br>CATCCACGTTCAATGCACCA         | Kowalczyk et al. (2014)       |
| 8   | <i>UBI-1</i>  | AF104391                       | <i>Ubiquitin-like protein</i>           | CCTTATTGACCAACCAGTAGT<br>GGACAATGTTGATTTCCTCG          | Migocka and Papierniak (2010) |
| 9   | <i>UBI-ep</i> | AY372537                       | <i>Ubiquitin extension protein</i>      | CACCAAGCCCCAAGAAGATC<br>TAAACCTAATCACCACCAGC           | Wan et al. (2010)             |
| 10  | <i>YSL8</i>   | GW881872                       | <i>Mitosis protein</i>                  | CCTTGTGGATATCACAGAAAGTT<br>CTTGTTTATCCTTGAGTGCC        | Migocka and Papierniak (2010) |

## References

- Kowalczyk C, Pawełkowicz M, Chądzyńska K, Paziewska A, Wóycicki R, Ostrowski J, Cebula J, Przybecki Z. Evaluation of reference genes transcription stability in generative whorls of cucumber flower (*Cucumis sativus* L.). 2014. In: Biotechnology and Plant Breeding Perspectives, Behl RK, Arseniuk E (eds.), Agrobios International, Jodhpur, India, pp.275-286.
- Migocka M, Papierniak A. Identification of suitable reference genes for studying gene expression in cucumber plants subjected to abiotic stress and growth regulators. 2010. Mol. Breed. 28:343-357.
- Wan H, Zhao Z, Qian C, Sui Y, Malik AA, Chen J. Selection of appropriate reference genes for gene expression studies by quantitative real-time polymerase chain reaction in cucumber. 2010. Anal. Biochem. 399:257-261.
