# Supplementary material for: Transcriptome Profiling of Cucumber (Cucumis sativus L.) Early Response to Pseudomonas syringae pv. lachrymans
Source: MDPI journal article supplement (doi:10.3390/ijms22084192), 2021-04-18
Supplement: s1 [file s1]

**Supplementary Table S3.** List of the genes and primer sequences used for validation of differentially expressed genes (DEGs) by RT-qPCR.

| No. | Abbreviation    | Cucumber gene ID<br>9930 v.2 | Gene description<br>9930 v.2                        | Cucumber gene ID<br>Gy14 v.2 | Gene description<br>Gy14 v.2                | <i>A. thaliana</i><br>ortholog<br>gene ID | <i>A. thaliana</i><br>gene description<br>TAIR10 | Primer sequences (5' → 3')<br>forward/reverse  |
|-----|-----------------|------------------------------|-----------------------------------------------------|------------------------------|---------------------------------------------|-------------------------------------------|--------------------------------------------------|------------------------------------------------|
| 1   | <i>ACO</i>      | Csa6G421630                  | 1-aminocyclopropane-1-carboxylate oxidase           | CsGy6G021870                 | 1-aminocyclopropane-1-carboxylate oxidase 1 | AT1G05010                                 | Ethylene-forming enzyme                          | CGAATCAAACATCTCCCAGA<br>CCTTTTCCAACCCAAGATTC   |
| 2   | <i>APKA1</i>    | Csa6G190390                  | Probable receptor-like protein kinase               | CsGy6G014300                 | Protein kinase APK1A                        | AT1G07570                                 | Protein kinase superfamily protein<br>APKA1      | TGGGTTTTCCAAGACACAG<br>ATGGTCGATTTTGTCAACG     |
| 3   | <i>ATPase</i>   | Novel_G000083                | -                                                   | CsGy2G006330                 | Cation-transporting P-type ATPase           | AT2G18960                                 | H <sup>(+)</sup> -ATPase 1                       | CAGGATTTTCGTTGGTATCGT<br>TGATGCATCTTGTTACACACC |
| 4   | <i>CRT3</i>     | Csa4G009350                  | Calreticulin-3                                      | CsGy4G002380                 | Calreticulin-3                              | AT1G08450                                 | Calreticulin 3                                   | AGGGGCAGAATTATCCCATA<br>CAGGATGTCCCAATCACTGT   |
| 5   | <i>CYP450</i>   | Csa1G524640                  | Cytochrome P450                                     | CsGy1G022780                 | Cytochrome P450                             | AT2G29090                                 | Cytochrome P450                                  | CGGAGATCAACAAGATTTGG<br>CACCTCCATGCTCTTTGTTC   |
| 6   | <i>DHN</i>      | Csa4G045040                  | Dehydrin                                            | CsGy4G005210                 | Dehydrin Xero 1                             | AT5G66400                                 | Dehydrin family protein                          | TAAGGAGCATGGTGGCATAAC<br>TTGACACTGCTTGCTCTTCA  |
| 7   | <i>EDS1</i>     | Csa1G006320                  | Enhanced disease susceptibility 1 protein           | CsGy1G001860                 | Protein EDS1L-like                          | AT3G48090                                 | Alpha/beta-Hydrolases superfamily protein        | GGAAGCTTAAGGAGGTTCTGA<br>TCTGGGTTTCTTTGCTGTTC  |
| 8   | <i>MAPKK</i>    | Csa1G042980                  | Mitogen-activated protein kinase kinase             | CsGy1G007240                 | Mitogen-activated protein kinase kinase 9   | AT1G73500                                 | MAP kinase kinase 9                              | TAAACCGTCGAATCTGTTGG<br>CGTAAGAATTGCAAGCATCC   |
| 9   | <i>MLO-like</i> | Csa1G085890                  | MLO-like protein                                    | CsGy1G012830                 | MLO-like protein                            | AT1G61560                                 | Seven transmembrane MLO family protein           | CACGTTGAGATGGGAGGTTA<br>GGGCCTCCAATATGAATCTC   |
| 10  | <i>NEP</i>      | Csa5G623870                  | Aspartic proteinase nepenthesin-1                   | CsGy5G027100                 | Eukaryotic aspartyl protease family protein | AT3G54400                                 | Eukaryotic aspartyl protease family protein      | TCGTCGATATTCCTCCCTCT<br>TGTTACGTTTCTCCCCACTC   |
| 11  | <i>PRI</i>      | Novel_G000423                | -                                                   | CsGy7G006240                 | Cysteine-rich venom protein                 | AT2G14610                                 | Pathogenesis-related gene 1                      | ACCTGTCAGTTGGGATGAAA<br>GCACGAGTTTGAGGCATAAT   |
| 12  | <i>PR4</i>      | Csa2G010390                  | Wound-induced protein WIN1                          | -                            | -                                           | AT3G04720                                 | Pathogenesis-related 4                           | ATACGGTTGGACTGCCCTTCT<br>AAATCTAGCCCTCCATTTGC  |
| 13  | <i>SGR</i>      | Csa5G156180                  | Senescence-inducible chloroplast stay-green protein | CsGy5G003280                 | STAYGREEN protein                           | AT4G22920                                 | Non-yellowing 1                                  | TTCTCTCTTCCCCTGTAAACG<br>GGAAATTTGCCTGGATGTTT  |
| 14  | <i>WRKY</i>     | Csa5G223070                  | WRKY transcription factor                           | CsGy5G008920                 | WRKY transcription factor 34                | AT2G40750                                 | WRKY DNA-binding protein 54                      | TGTCCTGATCATTCCTTTG<br>CTTTTGGCCGTACTTCCTC     |
