# Supplementary material for: Transcriptome Profiling of Cucumber (Cucumis sativus L.) Early Response to Pseudomonas syringae pv. lachrymans
Source: MDPI journal article supplement (doi:10.3390/ijms22084192), 2021-04-18
Supplement: s1 [file s1]

**Supplementary Table S1.** Summary of the RNA sequencing (RNA-seq) and mapping of the reads for two cucumber lines Gy14 and B10 at 0, 1 and 3 days post inoculation with *P. syringae* pv. *lachrymans* strain 814/98. As a reference cucumber genome 9930 v.2 was used. Each sample represents pool of three biological replicates.

| Sample     | Total raw reads (Mb) | Total clean reads (Mb) | Clean reads Q30 (%) | Reference genome mapping |                            | Summary of gene expression |                         |                            |
|------------|----------------------|------------------------|---------------------|--------------------------|----------------------------|----------------------------|-------------------------|----------------------------|
|            |                      |                        |                     | Total mapping ratio (%)  | Uniquely mapping ratio (%) | Total transcript number    | Total mapping ratio (%) | Uniquely mapping ratio (%) |
| Gy14_0 dpi | 48.11                | 44.91                  | 97.00               | 93.70                    | 92.23                      | 18,807                     | 75.10                   | 41.09                      |
| Gy14_1 dpi | 48.11                | 44.57                  | 96.69               | 93.47                    | 91.97                      | 18,871                     | 76.21                   | 40.23                      |
| Gy14_3 dpi | 48.11                | 44.63                  | 96.65               | 93.18                    | 91.64                      | 18,981                     | 73.53                   | 39.74                      |
| B10_0 dpi  | 48.11                | 44.81                  | 96.88               | 93.75                    | 92.27                      | 18,859                     | 74.53                   | 40.26                      |
| B10_1 dpi  | 48.11                | 44.77                  | 97.00               | 93.74                    | 92.27                      | 19,039                     | 75.15                   | 39.45                      |
| B10_3 dpi  | 48.11                | 44.56                  | 96.91               | 93.69                    | 92.18                      | 19,149                     | 73.12                   | 39.42                      |
