# Supplementary material for: Transcriptome Profiling of Cucumber (Cucumis sativus L.) Early Response to Pseudomonas syringae pv. lachrymans
Source: MDPI journal article supplement (doi:10.3390/ijms22084192), 2021-04-18
Supplement: s1 [file s1]

**Supplementary Table S5.** Overall ranking of candidate RT-qPCR reference genes analyzed by geNorm, NormFinder, BestKeeper and RefFinder applets.

| Rank<br>(weight) | Applet       |         |                    |                    |                  |                    | Overall ranking<br>RefFinder |         |
|------------------|--------------|---------|--------------------|--------------------|------------------|--------------------|------------------------------|---------|
|                  | geNorm v.3.4 |         | NormFinder v.0.953 |                    | BestKeeper v.1.0 |                    |                              |         |
|                  | Gene         | M-value | Gene               | Stability<br>value | Gene             | Stability<br>value | Gene                         | GeoMean |
| 1                | TUA          | 0.094   | CACS               | 0.261              | TIP41            | 0.265              | CACS                         | 1.86    |
| 2                | TUB          | 0.094   | ACT                | 0.292              | UBI-ep           | 0.298              | TIP41                        | 2.82    |
| 3                | ACT          | 0.362   | TIP41              | 0.428              | CACS             | 0.329              | ACT                          | 3.03    |
| 4                | CACS         | 0.456   | HEL                | 0.434              | UBI-1            | 0.399              | TUB                          | 4.28    |
| 5                | F-BOX        | 0.524   | UBI-1              | 0.471              | HEL              | 0.449              | TUA                          | 4.41    |
| 6                | HEL          | 0.557   | TUA                | 0.514              | F-BOX            | 0.454              | HEL                          | 4.68    |
| 7                | TIP41        | 0.585   | TUB                | 0.514              | ACT              | 0.513              | UBI-1                        | 5.32    |
| 8                | UBI-1        | 0.610   | UBI-ep             | 0.544              | TUB              | 0.586              | UBI-ep                       | 5.83    |
| 9                | UBI-ep       | 0.623   | F-BOX              | 0.550              | TUA              | 0.588              | F-BOX                        | 7.02    |
| 10               | YSL8         | 0.708   | YSL8               | 0.947              | YSL8             | 0.903              | YSL8                         | 10.00   |
