# Supplementary material for: Transcriptome Profiling of Cucumber (Cucumis sativus L.) Early Response to Pseudomonas syringae pv. lachrymans
Source: Int J Mol Sci. 2021 Apr 18;22(8):4192. doi: 10.3390/ijms22084192 (PMC8072787; doi:10.3390/ijms22084192)
Supplement: Supplementary file 1 [file ijms-22-04192-s001.zip]

Archive with 11 entries (11 files):
- Supplementary Figure S1.jpg
- Supplementary Figure S2.jpg
- Supplementary Figure S3.jpg
- Supplementary Figure S4.jpg
- Suppl_tableS1.pdf
- Suppl_tableS2.xlsx
- Suppl_tableS3.pdf
- Suppl_tableS4.pdf
- Suppl_tableS5.pdf
- Suppl_tableS6.xlsx
- Suppl_tableS7.xlsx
