# Supplementary material for: Transcriptome Profiling of Cucumber (Cucumis sativus L.) Early Response to Pseudomonas syringae pv. lachrymans
Source: Int J Mol Sci. 2021 Apr 18;22(8):4192. doi: 10.3390/ijms22084192 (PMC8072787; doi:10.3390/ijms22084192)
Supplement: Supplementary file 1 [file ijms-22-04192-s001.zip › Suppl_tableS2.xlsx]

## Sheet: Gy14_1 dpi
Gene	Length	Gy14_0-Expression	Gy14_1-Expression	log2FoldChange(Gy14_1/Gy14_0)	Pvalue	FDR	Up/Down-Regulation	Cellular Component	Molecular Function	Biological Process	Kegg Orthology	Nr Description
Csa5G285030	219	0.01	100.07	13.2887219127826	1.503892e-40	2.52804504939551e-39	Up	NA	GO:0030414//peptidase inhibitor activity	NA	NA	gi|700195661|gb|KGN50838.1|//hypothetical protein Csa_5G285030 [Cucumis sativus]
Csa6G133770	846	0.01	63.85	12.6404709045901	2.19836e-127	1.25126537309941e-125	Up	NA	NA	NA	K13434//pathogenesis-related genes transcriptional activator PTI6	gi|778712954|ref|XP_004140026.2|//PREDICTED: ethylene-responsive transcription factor ERF069-like [Cucumis sativus];gi|700191564|gb|KGN46768.1|//hypothetical protein Csa_6G133770 [Cucumis sativus]
Csa5G027950	228	0.01	61.29	12.5814359894544	1.780306e-26	2.0409562188457e-25	Up	NA	NA	NA	NA	gi|778698123|ref|XP_011654473.1|//PREDICTED: inhibitor of trypsin and hageman factor-like [Cucumis sativus]
Csa6G491710	303	0.01	38.92	11.9262959947811	2.22082e-24	2.38184474490358e-23	Up	NA	NA	NA	NA	gi|700193355|gb|KGN48559.1|//hypothetical protein Csa_6G491710 [Cucumis sativus]
Csa7G049140	945	0.01	33.74	11.7202442582876	3.50652e-76	1.10449706019417e-74	Up	NA	GO:0016209//antioxidant activity;GO:0005506//iron ion binding;GO:0003824//catalytic activity	GO:0008152//metabolic process;GO:0006950//response to stress	K00430//peroxidase [EC:1.11.1.7]	gi|449438109|ref|XP_004136832.1|//PREDICTED: peroxidase P7-like [Cucumis sativus]
Csa7G452230	234	0.01	25.47	11.3145832442742	8.36826e-12	4.87276545498056e-11	Up	NA	NA	NA	NA	gi|700190335|gb|KGN45568.1|//hypothetical protein Csa_7G452230 [Cucumis sativus]
Csa4G017210	243	0.01	19.64	10.9395792143147	1.043892e-09	5.25618253285049e-09	Up	NA	NA	NA	NA	gi|700197975|gb|KGN53133.1|//hypothetical protein Csa_4G017210 [Cucumis sativus]
Csa5G152820	867	0.01	18.95	10.8879821330585	2.37106e-39	3.84305195337219e-38	Up	GO:0031224//intrinsic component of membrane;GO:0009536//plastid	GO:0046914//transition metal ion binding;GO:0004497//monooxygenase activity	GO:0006631//fatty acid metabolic process;GO:0016117//carotenoid biosynthetic process	K15746//beta-carotene 3-hydroxylase [EC:1.14.13.129]	gi|449452452|ref|XP_004143973.1|//PREDICTED: beta-carotene 3-hydroxylase 1, chloroplastic-like isoform X1 [Cucumis sativus]
Csa2G021500	537	0.01	17.96	10.8105716347411	2.77036e-22	2.74861507441386e-21	Up	NA	NA	NA	NA	gi|700205760|gb|KGN60879.1|//hypothetical protein Csa_2G021500 [Cucumis sativus]
Csa3G853160	1590	0.01	16.85	10.7185328760692	5.3155e-66	1.42326716643741e-64	Up	NA	NA	NA	K00517	gi|449460175|ref|XP_004147821.1|//PREDICTED: cytochrome P450 CYP82D47-like [Cucumis sativus]
Csa3G733860	2502	0.01	15.80	10.6257088430645	2.43752e-98	1.0359992209607e-96	Up	NA	NA	NA	K04733//interleukin-1 receptor-associated kinase 4 [EC:2.7.11.1];K00276//primary-amine oxidase [EC:1.4.3.21]	gi|700203699|gb|KGN58832.1|//hypothetical protein Csa_3G733860 [Cucumis sativus]
Csa6G446290	2118	0.01	13.09	10.3542493819452	5.38554e-69	1.52376339593023e-67	Up	GO:0044424//intracellular part	GO:0016840//carbon-nitrogen lyase activity	GO:0006558//L-phenylalanine metabolic process	K10775//phenylalanine ammonia-lyase [EC:4.3.1.24]	gi|778717131|ref|XP_004143260.2|//PREDICTED: phenylalanine ammonia-lyase-like [Cucumis sativus]
BGI_novel_G000584	239	0.01	12.72	10.3128829552844	2.05306e-06	7.58058914264036e-06	Up	GO:0005737//cytoplasm	GO:0045548//phenylalanine ammonia-lyase activity	GO:0009800//cinnamic acid biosynthetic process;GO:0006559//L-phenylalanine catabolic process	K10775//phenylalanine ammonia-lyase [EC:4.3.1.24]	gi|778689757|ref|XP_011653013.1|//PREDICTED: phenylalanine ammonia-lyase-like [Cucumis sativus]
Csa5G612900	801	0.01	12.32	10.2667865406949	8.81816e-24	9.30880165726681e-23	Up	GO:0009526//plastid envelope	NA	NA	K10258//very-long-chain enoyl-CoA reductase [EC:1.3.1.93]	gi|449434532|ref|XP_004135050.1|//PREDICTED: 3-oxo-5-alpha-steroid 4-dehydrogenase 2-like [Cucumis sativus]
Csa7G396390	489	0.01	11.48	10.1649069266757	5.30774e-13	3.34587004015544e-12	Up	NA	NA	NA	NA	gi|700189691|gb|KGN44924.1|//hypothetical protein Csa_7G396390 [Cucumis sativus]
Csa5G517170	462	0.01	11.26	10.1369911120802	4.19956e-12	2.49537957753358e-11	Up	NA	NA	NA	K12486//stromal membrane-associated protein	gi|700196142|gb|KGN51319.1|//hypothetical protein Csa_5G517170 [Cucumis sativus]
Csa2G000210	303	0.01	10.58	10.047123912114	5.17056e-07	2.03169400403714e-06	Up	NA	NA	NA	NA	gi|700205393|gb|KGN60512.1|//hypothetical protein Csa_2G000210 [Cucumis sativus]
Csa4G000850	234	0.01	9.64	9.91288933622996	6.44998e-05	0.000200695829092072	Up	NA	NA	NA	NA	gi|700197608|gb|KGN52766.1|//hypothetical protein Csa_4G000850 [Cucumis sativus]
Csa2G234590	417	0.01	7.69	9.58683978796183	1.302194e-07	5.45598545071029e-07	Up	NA	NA	NA	NA	NA
BGI_novel_G000012	4380	0.01	7.13	9.47775826644389	7.07934e-79	2.30445539197324e-77	Up	GO:0016021//integral component of membrane	GO:0000287//magnesium ion binding;GO:0005524//ATP binding;GO:0004012//phospholipid-translocating ATPase activity	GO:0045332//phospholipid translocation	K01530//phospholipid-translocating ATPase [EC:3.6.3.1]	gi|778657179|ref|XP_004137458.2|//PREDICTED: putative phospholipid-transporting ATPase 9 [Cucumis sativus]
Csa7G201880	1200	0.01	6.96	9.44294349584873	8.70346e-21	8.09080956829035e-20	Up	NA	NA	NA	K14569//ribosome biogenesis protein BMS1	gi|700188903|gb|KGN44136.1|//hypothetical protein Csa_7G201880 [Cucumis sativus]
Csa5G173500	525	0.01	6.65	9.37721053038855	1.645816e-08	7.48363799486101e-08	Up	NA	NA	NA	K13448//calcium-binding protein CML	gi|778700636|ref|XP_004143706.2|//PREDICTED: probable calcium-binding protein CML44 [Cucumis sativus]
Csa1G597790	1554	0.01	6.57	9.35974956032233	1.408604e-25	1.57134014120344e-24	Up	GO:0005789//endoplasmic reticulum membrane	GO:0016709//oxidoreductase activity, acting on paired donors, with incorporation or reduction of molecular oxygen, NAD(P)H as one donor, and incorporation of one atom of oxygen;GO:0000166//nucleotide binding;GO:0050662//coenzyme binding	GO:0008152//metabolic process	K00485//dimethylaniline monooxygenase (N-oxide forming) [EC:1.14.13.8]	gi|449452773|ref|XP_004144133.1|//PREDICTED: probable flavin-containing monooxygenase 1 [Cucumis sativus]
Csa6G526440	564	0.01	6.37	9.3151495622563	1.645816e-08	7.48538650841122e-08	Up	NA	NA	NA	NA	gi|778722614|ref|XP_011658527.1|//PREDICTED: uncharacterized protein LOC105436047 [Cucumis sativus]
Csa6G022290	588	0.01	6.28	9.29462074889163	8.25942e-09	3.86114000288185e-08	Up	NA	NA	NA	NA	gi|700190713|gb|KGN45917.1|//hypothetical protein Csa_6G022290 [Cucumis sativus]
Csa5G527380	687	0.01	5.99	9.22641219278879	5.2387e-10	2.69209435586061e-09	Up	NA	NA	NA	K03544//ATP-dependent Clp protease ATP-binding subunit ClpX	gi|778703780|ref|XP_011655426.1|//PREDICTED: mitochondrial clpX-like chaperone MCX1 isoform X3 [Cucumis sativus]
Csa3G888550	306	0.01	5.84	9.18982455888002	0.000256106	0.000729707171545667	Up	NA	NA	NA	NA	gi|700205063|gb|KGN60196.1|//hypothetical protein Csa_3G888550 [Cucumis sativus]
BGI_novel_G000484	1399	0.01	5.77	9.17242750864548	3.45584e-20	3.12309106035283e-19	Up	NA	NA	NA	K18134//protein O-GlcNAc transferase [EC:2.4.1.255];K18207//protein O-mannose beta-1,4-N-acetylglucosaminyltransferase [EC:2.4.1.312]	gi|778676043|ref|XP_004147554.2|//PREDICTED: uncharacterized protein LOC101206708 [Cucumis sativus]
Csa4G508500	330	0.01	5.76	9.16992500144231	0.0001285256	0.000383547344718688	Up	NA	NA	NA	NA	gi|700199664|gb|KGN54822.1|//hypothetical protein Csa_4G508500 [Cucumis sativus]
Csa4G008260	735	0.01	5.57	9.12153351734003	5.2387e-10	2.69280523369422e-09	Up	NA	GO:0016829//lyase activity	GO:0006725//cellular aromatic compound metabolic process	K10775//phenylalanine ammonia-lyase [EC:4.3.1.24]	gi|700197814|gb|KGN52972.1|//hypothetical protein Csa_4G008260 [Cucumis sativus]
Csa3G852630	1617	0.08	42.83	9.06440596189104	3.743e-167	2.87989083003952e-165	Up	NA	NA	NA	K00517	gi|778686466|ref|XP_004147803.2|//PREDICTED: cytochrome P450 CYP82D47-like [Cucumis sativus]
Csa2G369140	597	0.01	5.31	9.05256805080415	6.53498e-08	2.81874408774651e-07	Up	NA	NA	NA	NA	gi|700207593|gb|KGN62712.1|//hypothetical protein Csa_2G369140 [Cucumis sativus]
Csa5G152240	345	0.01	5.03	8.97441458980553	0.000256106	0.000729600379920972	Up	NA	GO:0043169//cation binding	GO:0006812//cation transport	K10572//inositol-pentakisphosphate 2-kinase [EC:2.7.1.158];K12823//ATP-dependent RNA helicase DDX5/DBP2 [EC:3.6.4.13]	gi|778699495|ref|XP_011654720.1|//PREDICTED: putative late blight resistance protein homolog R1B-17 [Cucumis sativus]
Csa4G285790	903	0.01	4.92	8.94251450533924	3.32276e-11	1.85917925150905e-10	Up	NA	GO:0046872//metal ion binding;GO:0003824//catalytic activity	NA	K00430//peroxidase [EC:1.11.1.7]	gi|700198945|gb|KGN54103.1|//hypothetical protein Csa_4G285790 [Cucumis sativus]
Csa2G010390	429	0.32	152.87	8.9000176920835	5.56552e-140	3.57552515907591e-138	Up	GO:0030312//external encapsulating structure	NA	GO:0006952//defense response	NA	gi|449442941|ref|XP_004139239.1|//PREDICTED: pathogenesis-related protein PR-4 [Cucumis sativus]
Csa7G063420	546	0.01	4.77	8.89784545600551	2.05306e-06	7.57484191811979e-06	Up	NA	NA	NA	K13691//pathogen-inducible salicylic acid glucosyltransferase [EC:2.4.1.-];K00699//glucuronosyltransferase [EC:2.4.1.17];K13030//cyanohydrin beta-glucosyltransferase [EC:2.4.1.85]	gi|700188494|gb|KGN43727.1|//hypothetical protein Csa_7G063420 [Cucumis sativus]
Csa3G822450	759	0.01	4.75	8.89178370321831	4.14494e-09	1.98536914468504e-08	Up	NA	NA	NA	K09419//heat shock transcription factor, other eukaryote	gi|449438018|ref|XP_004136787.1|//PREDICTED: heat stress transcription factor B-3-like [Cucumis sativus]
Csa4G303680	669	0.46	214.21	8.86317625471812	0	0	Up	NA	NA	NA	K00799//glutathione S-transferase [EC:2.5.1.18]	gi|778693603|ref|XP_004147912.2|//PREDICTED: probable glutathione S-transferase [Cucumis sativus]
Csa4G049610	1337	0.01	4.61	8.84862294042934	3.4109e-17	2.66118554709419e-16	Up	NA	GO:0016846//carbon-sulfur lyase activity;GO:0048037//cofactor binding;GO:0016740//transferase activity	GO:0008652//cellular amino acid biosynthetic process	K01762//1-aminocyclopropane-1-carboxylate synthase [EC:4.4.1.14]	gi|700198195|gb|KGN53353.1|//hypothetical protein Csa_4G049610 [Cucumis sativus]
Csa3G779020	669	0.01	4.49	8.81057163474115	1.302194e-07	5.45363778055077e-07	Up	NA	NA	NA	K08488//syntaxin 7	gi|778684454|ref|XP_011652031.1|//PREDICTED: protein YLS9-like [Cucumis sativus]
Csa6G006800	1482	0.01	4.16	8.70043971814109	1.071584e-15	7.81252964194757e-15	Up	NA	GO:0016846//carbon-sulfur lyase activity;GO:0048037//cofactor binding;GO:0016740//transferase activity	GO:0008652//cellular amino acid biosynthetic process;GO:0003006//developmental process involved in reproduction;GO:0009692//ethylene metabolic process	K01762//1-aminocyclopropane-1-carboxylate synthase [EC:4.4.1.14]	gi|700190490|gb|KGN45694.1|//hypothetical protein Csa_6G006800 [Cucumis sativus]
Csa5G128240	656	0.01	4.16	8.70043971814109	1.030314e-06	3.9279460094007e-06	Up	NA	GO:0004553//hydrolase activity, hydrolyzing O-glycosyl compounds	GO:0006026//aminoglycan catabolic process	K01183//chitinase [EC:3.2.1.14]	gi|449463513|ref|XP_004149478.1|//PREDICTED: chitinase 10 [Cucumis sativus];gi|700194609|gb|KGN49786.1|//hypothetical protein Csa_5G128240 [Cucumis sativus]
Csa6G303740	420	0.01	3.98	8.63662462054365	0.000256106	0.000730241598945364	Up	NA	NA	NA	K14841//ribosome biogenesis protein NSA1	gi|449461007|ref|XP_004148235.1|//PREDICTED: zinc finger protein ZAT11 [Cucumis sativus]
Csa1G703580	555	0.01	3.84	8.58496250072116	1.62441e-05	5.43779278761823e-05	Up	NA	NA	NA	K12236//transcriptional repressor NF-X1	gi|778664568|ref|XP_011660313.1|//PREDICTED: protein PHLOEM PROTEIN 2-LIKE A9-like [Cucumis sativus]
Csa6G419490	798	0.01	3.67	8.51963625284321	2.59482e-07	1.05186934860475e-06	Up	NA	NA	NA	NA	gi|700192748|gb|KGN47952.1|//hypothetical protein Csa_6G419490 [Cucumis sativus]
Csa5G027940	453	0.01	3.64	8.5077946401987	0.000256106	0.000729386890416971	Up	NA	NA	NA	K14006//protein transport protein SEC23	gi|449449034|ref|XP_004142270.1|//PREDICTED: cell number regulator 2-like [Cucumis sativus]
Csa4G063470	1077	0.01	3.56	8.4757334309664	1.043892e-09	5.25482329247479e-09	Up	NA	NA	NA	K14508//regulatory protein NPR1	gi|700198355|gb|KGN53513.1|//hypothetical protein Csa_4G063470 [Cucumis sativus]
Csa3G076000	936	0.01	3.38	8.40087943628219	3.27954e-08	1.45287950933091e-07	Up	NA	NA	NA	K01759//lactoylglutathione lyase [EC:4.4.1.5]	gi|700200980|gb|KGN56113.1|//hypothetical protein Csa_3G076000 [Cucumis sativus]
Csa3G123170	531	0.01	3.28	8.35755200461808	0.0001285256	0.000383429782314176	Up	NA	NA	NA	NA	gi|449433099|ref|XP_004134335.1|//PREDICTED: BON1-associated protein 2-like [Cucumis sativus]
Csa1G088450	498	0.01	3.26	8.34872815423108	0.000256106	0.000729813994437125	Up	NA	NA	NA	K13944;K01227//mannosyl-glycoprotein endo-beta-N-acetylglucosaminidase [EC:3.2.1.96];K14491//two-component response regulator ARR-B family	gi|700209659|gb|KGN64755.1|//hypothetical protein Csa_1G088450 [Cucumis sativus]
Csa2G404910	1938	0.01	3.09	8.27146302790437	2.1353e-15	1.53209545890159e-14	Up	NA	GO:0003824//catalytic activity	NA	K13418//somatic embryogenesis receptor kinase 1 [EC:2.7.10.1 2.7.11.1];K04730//interleukin-1 receptor-associated kinase 1 [EC:2.7.11.1];K13416//brassinosteroid insensitive 1-associated receptor kinase 1 [EC:2.7.10.1 2.7.11.1]	gi|449442064|ref|XP_004138802.1|//PREDICTED: probable inactive leucine-rich repeat receptor-like protein kinase At1g66830 isoform X1 [Cucumis sativus]
Csa5G632120	960	0.01	2.90	8.17990909001493	2.59482e-07	1.05208844240783e-06	Up	NA	GO:0008233//peptidase activity	NA	K07763//matrix metalloproteinase-14 (membrane-inserted) [EC:3.4.24.80];K01402//matrix metalloproteinase-8 (neutrophil collagenase) [EC:3.4.24.34];K07999//matrix metalloproteinase-20 (enamelysin) [EC:3.4.24.-]	gi|449449419|ref|XP_004142462.1|//PREDICTED: metalloendoproteinase 1 [Cucumis sativus]
Csa6G500440	594	0.01	2.89	8.17492568250068	0.0001285256	0.000383312291956488	Up	NA	NA	NA	NA	gi|778719160|ref|XP_011657970.1|//PREDICTED: uncharacterized protein LOC105435926 [Cucumis sativus]
Csa1G612830	591	0.01	2.85	8.1548181090521	0.000256106	0.000730134650849443	Up	NA	NA	NA	K01188//beta-glucosidase [EC:3.2.1.21]	gi|778665367|ref|XP_011648547.1|//PREDICTED: beta-glucosidase 10-like [Cucumis sativus]
Csa6G216410	909	0.01	2.79	8.12412131182919	1.030314e-06	3.93025520752499e-06	Up	NA	GO:0016209//antioxidant activity;GO:0005506//iron ion binding;GO:0003824//catalytic activity	GO:0042743//hydrogen peroxide metabolic process;GO:0006950//response to stress	K00430//peroxidase [EC:1.11.1.7]	gi|700192018|gb|KGN47222.1|//hypothetical protein Csa_6G216410 [Cucumis sativus]
Csa3G305660	3276	0.01	2.70	8.07681559705083	1.390284e-22	1.39357715468589e-21	Up	NA	GO:0016817//hydrolase activity, acting on acid anhydrides;GO:0005488//binding	NA	K15192//TATA-binding protein-associated factor [EC:3.6.4.-]	gi|700202662|gb|KGN57795.1|//hypothetical protein Csa_3G305660 [Cucumis sativus]
Csa4G015100	1026	0.37	98.58	8.05762590004228	1.972034e-234	2.23183801418605e-232	Up	NA	GO:0003824//catalytic activity	GO:0008152//metabolic process	K05275//pyridoxine 4-dehydrogenase [EC:1.1.1.65]	gi|778690006|ref|XP_011653050.1|//PREDICTED: probable aldo-keto reductase 2 [Cucumis sativus]
Csa2G421010	993	0.01	2.61	8.02790599656988	1.030314e-06	3.92871544054848e-06	Up	NA	NA	NA	K00700//1,4-alpha-glucan branching enzyme [EC:2.4.1.18]	gi|449468339|ref|XP_004151879.1|//PREDICTED: APO protein 4, mitochondrial [Cucumis sativus]
Csa3G592100	990	0.01	2.58	8.01122725542325	1.030314e-06	3.92717687957705e-06	Up	NA	NA	NA	K14493//gibberellin receptor GID1 [EC:3.-.-.-]	gi|700203072|gb|KGN58205.1|//hypothetical protein Csa_3G592100 [Cucumis sativus]
Csa5G352610	831	0.01	2.56	8	1.62441e-05	5.43872808049536e-05	Up	NA	NA	NA	K00254//dihydroorotate dehydrogenase [EC:1.3.5.2]	gi|700195764|gb|KGN50941.1|//hypothetical protein Csa_5G352610 [Cucumis sativus]
Csa5G023870	1335	0.01	2.51	7.97154355395077	8.25942e-09	3.86021295846339e-08	Up	NA	NA	NA	K01876//aspartyl-tRNA synthetase [EC:6.1.1.12];K08332//vacuolar protein 8	gi|449449104|ref|XP_004142305.1|//PREDICTED: U-box domain-containing protein 21-like [Cucumis sativus]
Csa6G094690	1239	0.01	2.50	7.96578428466209	6.53498e-08	2.81936880939716e-07	Up	NA	NA	NA	NA	gi|700191247|gb|KGN46451.1|//hypothetical protein Csa_6G094690 [Cucumis sativus]
Csa4G008770	1779	0.01	2.36	7.88264304936184	6.6211e-11	3.62651470455824e-10	Up	GO:0044424//intracellular part	GO:0016840//carbon-nitrogen lyase activity	GO:0006558//L-phenylalanine metabolic process	K10775//phenylalanine ammonia-lyase [EC:4.3.1.24]	gi|778697444|ref|XP_004152155.2|//PREDICTED: phenylalanine ammonia-lyase-like [Cucumis sativus]
Csa3G611890	696	0.01	2.33	7.86418614465428	0.000256106	0.000729920848609078	Up	NA	NA	NA	NA	gi|700203182|gb|KGN58315.1|//hypothetical protein Csa_3G611890 [Cucumis sativus]
Csa3G740170	1113	0.01	2.32	7.85798099512757	1.030314e-06	3.92948517319749e-06	Up	NA	NA	NA	K14649//transcription initiation factor TFIID subunit 8	gi|449440123|ref|XP_004137834.1|//PREDICTED: transcription initiation factor TFIID subunit 8-like [Cucumis sativus]
BGI_novel_G000366	728	0.01	2.31	7.85174904141606	0.0001285256	0.000383606152959215	Up	NA	NA	NA	NA	gi|567909957|ref|XP_006447292.1|//hypothetical protein CICLE_v10016466mg [Citrus clementina]
Csa6G492250	1503	0.33	75.15	7.83116326944527	4.90024e-266	6.67049453426573e-264	Up	NA	NA	NA	K00517;K13260//isoflavone 2'-hydroxylase [EC:1.14.13.89]	gi|778718524|ref|XP_004141996.2|//PREDICTED: cytochrome P450 81E8-like [Cucumis sativus]
Csa1G534750	837	0.15	32.81	7.7730292829099	4.56746e-63	1.17918005782493e-61	Up	GO:0030312//external encapsulating structure	GO:0004553//hydrolase activity, hydrolyzing O-glycosyl compounds;GO:0030247//polysaccharide binding	GO:0033554//cellular response to stress;GO:0006026//aminoglycan catabolic process;GO:0009793//embryo development ending in seed dormancy	K01183//chitinase [EC:3.2.1.14]	gi|449454971|ref|XP_004145227.1|//PREDICTED: endochitinase PR4-like [Cucumis sativus]
BGI_novel_G000192	901	0.14	30.58	7.7710177693032	1.160856e-63	3.0250633060241e-62	Up	NA	GO:0016740//transferase activity	NA	K00799//glutathione S-transferase [EC:2.5.1.18]	gi|778688803|ref|XP_011652841.1|//PREDICTED: glutathione S-transferase L3-like [Cucumis sativus]
Csa6G017030	933	0.01	2.17	7.76155123244448	1.62441e-05	5.43966369516601e-05	Up	NA	NA	NA	K09286//EREBP-like factor	gi|778709855|ref|XP_004138542.2|//PREDICTED: ethylene-responsive transcription factor ERF110-like [Cucumis sativus]
Csa7G430250	1629	0.08	16.91	7.72366094440998	9.60198e-66	2.5639525744856e-64	Up	NA	GO:0003824//catalytic activity;GO:0005488//binding	NA	K01904//4-coumarate--CoA ligase [EC:6.2.1.12]	gi|778728828|ref|XP_004135893.2|//PREDICTED: 4-coumarate--CoA ligase 2-like [Cucumis sativus]
Csa7G061710	1248	0.50	101.00	7.6582114827518	6.70898e-293	1.06176426569106e-290	Up	NA	GO:0016209//antioxidant activity;GO:0005506//iron ion binding;GO:0003824//catalytic activity	GO:0008152//metabolic process;GO:0006950//response to stress	K00430//peroxidase [EC:1.11.1.7]	gi|700188471|gb|KGN43704.1|//hypothetical protein Csa_7G061710 [Cucumis sativus];gi|449438179|ref|XP_004136867.1|//PREDICTED: peroxidase N1-like [Cucumis sativus]
Csa5G608090	1209	0.01	1.96	7.61470984411521	2.05306e-06	7.58346602656546e-06	Up	NA	NA	NA	NA	gi|778705799|ref|XP_011655745.1|//PREDICTED: uncharacterized protein LOC105435580 [Cucumis sativus]
Csa6G476690	927	0.01	1.91	7.57742882803575	6.44998e-05	0.000200663753683874	Up	NA	NA	NA	K08486//syntaxin 1B/2/3	gi|778722378|ref|XP_004143398.2|//PREDICTED: syntaxin-121-like [Cucumis sativus]
BGI_novel_G000279	1749	0.01	1.86	7.53915881110803	1.645816e-08	7.48888598784479e-08	Up	NA	NA	NA	K17964//leucine-rich PPR motif-containing protein, mitochondrial	gi|700195203|gb|KGN50380.1|//hypothetical protein Csa_5G171145 [Cucumis sativus]
Csa3G837050	1431	0.01	1.81	7.49984588708321	5.17056e-07	2.03128397497477e-06	Up	NA	NA	NA	NA	gi|778688955|ref|XP_004141189.2|//PREDICTED: polygalacturonase QRT3-like [Cucumis sativus]
Csa6G513600	1263	0.01	1.77	7.467605550083	4.09102e-06	1.46201203084267e-05	Up	NA	NA	NA	NA	gi|778720312|ref|XP_004134976.2|//PREDICTED: probable F-box protein At4g22030 [Cucumis sativus]
Csa6G499840	1144	0.01	1.77	7.467605550083	8.152e-06	2.82914658584418e-05	Up	NA	GO:0016758//transferase activity, transferring hexosyl groups	GO:0008152//metabolic process	K13691//pathogen-inducible salicylic acid glucosyltransferase [EC:2.4.1.-];K00699//glucuronosyltransferase [EC:2.4.1.17];K13030//cyanohydrin beta-glucosyltransferase [EC:2.4.1.85]	gi|449451425|ref|XP_004143462.1|//PREDICTED: 7-deoxyloganetin glucosyltransferase-like isoform X2 [Cucumis sativus]
Csa3G690840	1347	0.01	1.75	7.45121111183233	2.05306e-06	7.576277907109e-06	Up	NA	GO:0016798//hydrolase activity, acting on glycosyl bonds	GO:0008152//metabolic process	K01184//polygalacturonase [EC:3.2.1.15];K01213//galacturan 1,4-alpha-galacturonidase [EC:3.2.1.67]	gi|778682780|ref|XP_011651773.1|//PREDICTED: polygalacturonase-like [Cucumis sativus]
Csa7G432410	1215	0.01	1.62	7.33985000288462	3.23688e-05	0.000104910266533467	Up	NA	NA	NA	K17604//zinc finger SWIM domain-containing protein 3	gi|700190026|gb|KGN45259.1|//hypothetical protein Csa_7G432410 [Cucumis sativus]
Csa6G151700	2577	0.01	1.57	7.29462074889163	1.319352e-10	7.07702012455222e-10	Up	NA	GO:0016301//kinase activity	NA	K08286//protein-serine/threonine kinase [EC:2.7.11.-]	gi|778713558|ref|XP_011657065.1|//PREDICTED: serine/threonine-protein kinase D6PKL1-like [Cucumis sativus]
Csa3G228870	3315	0.01	1.52	7.24792751344359	2.66366e-13	1.70786579578393e-12	Up	NA	GO:0000166//nucleotide binding;GO:0004386//helicase activity	NA	K18995//ATP-dependent RNA helicase DHX29 [EC:3.6.4.13]	gi|778680313|ref|XP_011651287.1|//PREDICTED: ATP-dependent RNA helicase DHX29 isoform X1 [Cucumis sativus];gi|700202477|gb|KGN57610.1|//hypothetical protein Csa_3G228870 [Cucumis sativus]
Csa4G304750	579	0.28	42.42	7.24317398347295	3.78724e-54	8.40620454275941e-53	Up	NA	NA	NA	K00799//glutathione S-transferase [EC:2.5.1.18]	gi|700199171|gb|KGN54329.1|//hypothetical protein Csa_4G304750 [Cucumis sativus]
Csa7G395260	2277	0.21	31.49	7.22836061935665	3.51908e-169	2.78465086504065e-167	Up	NA	NA	GO:0030001//metal ion transport	K03549//KUP system potassium uptake protein	gi|449436533|ref|XP_004136047.1|//PREDICTED: potassium transporter 5-like [Cucumis sativus]
Csa5G523120	1911	0.01	1.48	7.20945336562895	1.302194e-07	5.45716004391819e-07	Up	NA	NA	NA	K17964//leucine-rich PPR motif-containing protein, mitochondrial	gi|778703656|ref|XP_004142850.2|//PREDICTED: pentatricopeptide repeat-containing protein At5g40400 [Cucumis sativus]
Csa2G349630	711	0.36	49.05	7.09011241966429	2.62428e-77	8.38821584236453e-76	Up	GO:0009536//plastid	NA	GO:0031163//metallo-sulfur cluster assembly;GO:0031325//positive regulation of cellular metabolic process	K03517//quinolinate synthase [EC:2.5.1.72]	gi|449450616|ref|XP_004143058.1|//PREDICTED: sufE-like protein 2, chloroplastic [Cucumis sativus]
Csa1G633420	1227	0.10	13.49	7.0757465380609	1.018932e-38	1.62978885061627e-37	Up	NA	NA	NA	K10260//F-box and WD-40 domain protein 7;K01876//aspartyl-tRNA synthetase [EC:6.1.1.12];K09553//stress-induced-phosphoprotein 1;K08332//vacuolar protein 8	gi|449442749|ref|XP_004139143.1|//PREDICTED: E3 ubiquitin-protein ligase PUB23-like [Cucumis sativus]
Csa3G182750	2175	0.01	1.29	7.01122725542325	1.302194e-07	5.45481136302991e-07	Up	NA	NA	NA	K04733//interleukin-1 receptor-associated kinase 4 [EC:2.7.11.1];K04730//interleukin-1 receptor-associated kinase 1 [EC:2.7.11.1]	gi|700202257|gb|KGN57390.1|//hypothetical protein Csa_3G182750 [Cucumis sativus]
Csa7G446790	2817	0.05	6.36	6.99095486039699	3.64846e-43	6.52166412855831e-42	Up	NA	NA	NA	K04733//interleukin-1 receptor-associated kinase 4 [EC:2.7.11.1];K01183//chitinase [EC:3.2.1.14]	gi|700190129|gb|KGN45362.1|//hypothetical protein Csa_7G446790 [Cucumis sativus];gi|778729310|ref|XP_011659567.1|//PREDICTED: LOW QUALITY PROTEIN: G-type lectin S-receptor-like serine/threonine-protein kinase CES101 [Cucumis sativus]
BGI_novel_G000211	3956	0.01	1.20	6.90689059560852	2.10752e-12	1.27604927900467e-11	Up	NA	NA	NA	K10406//kinesin family member C2/C3	gi|449469054|ref|XP_004152236.1|//PREDICTED: kinesin-4 isoform X1 [Cucumis sativus]
Csa7G073510	1455	0.01	1.19	6.89481776330794	6.44998e-05	0.000200727914756195	Up	NA	NA	NA	K13496//UDP-glucosyl transferase 73C [EC:2.4.1.-]	gi|778725059|ref|XP_011658896.1|//PREDICTED: scopoletin glucosyltransferase-like [Cucumis sativus]
Csa1G348950	483	0.84	98.27	6.87021791774752	2.86642e-99	1.23446309115044e-97	Up	NA	NA	NA	NA	gi|449467497|ref|XP_004151459.1|//PREDICTED: umecyanin-like [Cucumis sativus]
Csa1G124520	2796	0.01	1.12	6.8073549220576	1.645816e-08	7.48713583921477e-08	Up	NA	NA	NA	NA	gi|778659191|ref|XP_004139558.2|//PREDICTED: uncharacterized protein LOC101202906 [Cucumis sativus]
BGI_novel_G000460	1412	0.01	1.12	6.8073549220576	0.000256106	0.00072928019251024	Up	NA	NA	NA	K10706//senataxin [EC:3.6.4.-]	gi|778729410|ref|XP_011659577.1|//PREDICTED: uncharacterized protein LOC101216410 isoform X1 [Cucumis sativus]
Csa5G648630	1986	0.06	6.69	6.8008998999203	1.288794e-31	1.71363825163934e-30	Up	NA	NA	NA	K04730//interleukin-1 receptor-associated kinase 1 [EC:2.7.11.1]	gi|449447741|ref|XP_004141626.1|//PREDICTED: probable L-type lectin-domain containing receptor kinase VI.1 [Cucumis sativus]
BGI_novel_G000139	2302	0.01	1.03	6.68650052718322	2.05306e-06	7.57771444065226e-06	Up	NA	NA	NA	K11996//adenylyltransferase and sulfurtransferase [EC:2.7.7.80];K02949//small subunit ribosomal protein S11e	gi|778677498|ref|XP_011650800.1|//PREDICTED: tRNA threonylcarbamoyladenosine dehydratase isoform X2 [Cucumis sativus]
Csa5G606840	1974	0.12	12.35	6.68533282575088	6.70178e-57	1.55490881382598e-55	Up	NA	NA	NA	K15639//PHYB activation tagged suppressor 1 [EC:1.14.-.-]	gi|700196817|gb|KGN51994.1|//hypothetical protein Csa_5G606840 [Cucumis sativus];gi|778705653|ref|XP_004135429.2|//PREDICTED: cytochrome P450 CYP749A22-like [Cucumis sativus]
Csa2G431190	2358	0.01	1.01	6.6582114827518	2.05306e-06	7.58202731170556e-06	Up	NA	NA	NA	K17710//pentatricopeptide repeat domain-containing protein 1	gi|778673746|ref|XP_011650052.1|//PREDICTED: pentatricopeptide repeat-containing protein At5g14770, mitochondrial [Cucumis sativus]
Csa1G612320	1533	0.01	1.00	6.64385618977473	0.000256106	0.000730027734075267	Up	NA	NA	NA	K01188//beta-glucosidase [EC:3.2.1.21]	gi|700211361|gb|KGN66457.1|//hypothetical protein Csa_1G612320 [Cucumis sativus]
Csa6G498410	1457	0.27	26.50	6.61688914217446	1.120822e-89	4.31184210513834e-88	Up	NA	GO:0016758//transferase activity, transferring hexosyl groups	GO:0008152//metabolic process	K12937//cyanidin-3-O-glucoside 2''-O-glucuronosyltransferase [EC:2.4.1.254];K18823//soyasaponin III rhamnosyltransferase [EC:2.4.1.273]	gi|700193489|gb|KGN48693.1|//hypothetical protein Csa_6G498410 [Cucumis sativus];gi|778718964|ref|XP_004143545.2|//PREDICTED: UDP-glycosyltransferase 91A1-like [Cucumis sativus]
Csa3G135720	1125	1.89	181.86	6.58829821328441	0	0	Up	NA	NA	NA	K06892//feruloyl-CoA ortho-hydroxylase [EC:1.14.11.-];K13229//2,4-dihydroxy-1,4-benzoxazin-3-one-glucoside dioxygenase [EC:1.14.20.2]	gi|449433261|ref|XP_004134416.1|//PREDICTED: 1-aminocyclopropane-1-carboxylate oxidase homolog 1 [Cucumis sativus]
Csa6G363020	1431	1.04	99.90	6.58582924453869	0	0	Up	NA	NA	NA	K19626//inversin;K06694//26S proteasome non-ATPase regulatory subunit 10	gi|449453053|ref|XP_004144273.1|//PREDICTED: ankyrin repeat-containing protein At3g12360-like [Cucumis sativus]
Csa3G180310	1668	0.01	0.96	6.58496250072116	0.0001285256	0.00038325357377451	Up	GO:0044464//cell part	GO:0015291//secondary active transmembrane transporter activity	GO:0015893//drug transport	K03327//multidrug resistance protein, MATE family	gi|700202210|gb|KGN57343.1|//hypothetical protein Csa_3G180310 [Cucumis sativus]
Csa7G432480	576	1.15	108.30	6.55725557155131	1.14815e-131	6.7522319939577e-130	Up	NA	NA	NA	NA	gi|449436615|ref|XP_004136088.1|//PREDICTED: cucumber peeling cupredoxin-like [Cucumis sativus]
Csa4G304250	660	0.61	55.95	6.51918507830087	1.75807e-79	5.78084301013513e-78	Up	NA	NA	NA	K00799//glutathione S-transferase [EC:2.5.1.18]	gi|778693628|ref|XP_004147907.2|//PREDICTED: glutathione S-transferase U8-like [Cucumis sativus]
Csa6G445780	1191	0.31	28.22	6.50830596221039	2.62428e-77	8.40201225e-76	Up	GO:0044424//intracellular part	GO:0016840//carbon-nitrogen lyase activity	GO:0006558//L-phenylalanine metabolic process	K10775//phenylalanine ammonia-lyase [EC:4.3.1.24]	gi|778722345|ref|XP_011658467.1|//PREDICTED: phenylalanine ammonia-lyase 1-like [Cucumis sativus]
Csa6G125240	1794	0.07	6.20	6.46876948321663	2.65378e-26	3.02273150848449e-25	Up	NA	NA	NA	K14487//auxin responsive GH3 gene family	gi|449444564|ref|XP_004140044.1|//PREDICTED: indole-3-acetic acid-amido synthetase GH3.6-like [Cucumis sativus]
Csa1G659600	2196	0.01	0.86	6.4262647547021	3.23688e-05	0.000104927737019151	Up	NA	NA	NA	K17964//leucine-rich PPR motif-containing protein, mitochondrial;K03452//magnesium/proton exchanger;K10683//BRCA1-associated RING domain protein 1	gi|778664160|ref|XP_011660234.1|//PREDICTED: pentatricopeptide repeat-containing protein At4g32450, mitochondrial [Cucumis sativus]
Csa3G791510	1473	0.08	6.70	6.38801728534513	4.60856e-23	4.71910725723304e-22	Up	GO:0016020//membrane;GO:0009536//plastid	GO:0010354//homogentisate prenyltransferase activity	GO:0044763//single-organism cellular process;GO:0044711//single-organism biosynthetic process;GO:1901576//organic substance biosynthetic process;GO:0044249//cellular biosynthetic process	K12501//homogentisate solanesyltransferase [EC:2.5.1.117]	gi|700204127|gb|KGN59260.1|//hypothetical protein Csa_3G791510 [Cucumis sativus];gi|449437532|ref|XP_004136546.1|//PREDICTED: probable homogentisate phytyltransferase 2, chloroplastic [Cucumis sativus]
Csa4G354130	792	1.62	131.09	6.33842001263896	1.972826e-223	2.03190639767196e-221	Up	NA	NA	GO:0008152//metabolic process	NA	gi|778694210|ref|XP_004142649.2|//PREDICTED: putative methyltransferase DDB_G0268948 [Cucumis sativus]
Csa1G024160	1193	0.17	12.95	6.25127354132358	4.71296e-36	7.06798762403698e-35	Up	NA	NA	NA	K09422//myb proto-oncogene protein, plant	gi|700208734|gb|KGN63830.1|//hypothetical protein Csa_1G024160 [Cucumis sativus];gi|449439539|ref|XP_004137543.1|//PREDICTED: myb-related protein 305-like [Cucumis sativus]
Csa5G527890	732	0.07	5.28	6.23703919730085	2.08012e-09	1.02199939222615e-08	Up	NA	NA	NA	K03544//ATP-dependent Clp protease ATP-binding subunit ClpX	gi|700196224|gb|KGN51401.1|//hypothetical protein Csa_5G527890 [Cucumis sativus]
Csa7G425920	2418	0.01	0.68	6.08746284125034	0.0001285256	0.000383371028133619	Up	NA	NA	NA	K15078//structure-specific endonuclease subunit SLX1 [EC:3.6.1.-]	gi|778728520|ref|XP_011659433.1|//PREDICTED: putative disease resistance protein RGA4 [Cucumis sativus]
Csa1G680120	1458	0.53	34.65	6.03071918246138	7.97498e-117	4.05328879060052e-115	Up	NA	GO:0048037//cofactor binding;GO:0003824//catalytic activity	GO:0019752//carboxylic acid metabolic process	K01620//threonine aldolase [EC:4.1.2.48]	gi|778664311|ref|XP_004142582.2|//PREDICTED: probable low-specificity L-threonine aldolase 1 [Cucumis sativus];gi|700211669|gb|KGN66765.1|//hypothetical protein Csa_1G680120 [Cucumis sativus]
Csa5G167220	1008	1.12	72.97	6.0257328163644	6.23094e-159	4.50897687881041e-157	Up	NA	GO:0046872//metal ion binding;GO:0003824//catalytic activity	NA	K00430//peroxidase [EC:1.11.1.7]	gi|449451970|ref|XP_004143733.1|//PREDICTED: peroxidase 2-like [Cucumis sativus]
Csa3G592690	1440	1.55	96.42	5.95899230912201	6e-304	9.89796610169491e-302	Up	NA	GO:0016757//transferase activity, transferring glycosyl groups	NA	K13691//pathogen-inducible salicylic acid glucosyltransferase [EC:2.4.1.-]	gi|449455968|ref|XP_004145722.1|//PREDICTED: UDP-glycosyltransferase 74E2-like [Cucumis sativus]
Csa4G022910	1542	0.08	4.87	5.92777796208234	1.737306e-17	1.37138680437956e-16	Up	GO:0016020//membrane	GO:0022857//transmembrane transporter activity;GO:0016491//oxidoreductase activity	GO:0006810//transport	K08150//MFS transporter, SP family, solute carrier family 2 (myo-inositol transporter), member 13	gi|449458417|ref|XP_004146944.1|//PREDICTED: hexose carrier protein HEX6-like isoform X1 [Cucumis sativus]
Csa6G151640	4332	0.03	1.82	5.92283213947754	5.9619e-19	5.04803590256633e-18	Up	NA	NA	NA	K05681//ATP-binding cassette, subfamily G (WHITE), member 2	gi|449456092|ref|XP_004145784.1|//PREDICTED: pleiotropic drug resistance protein 2-like [Cucumis sativus]
Csa2G174670	1371	0.12	7.23	5.91288933622996	2.34064e-23	2.43002123946667e-22	Up	GO:0043231//intracellular membrane-bounded organelle	GO:0001071//nucleic acid binding transcription factor activity;GO:0003676//nucleic acid binding	GO:0009743//response to carbohydrate;GO:0006970//response to osmotic stress;GO:0009725//response to hormone;GO:0006351//transcription, DNA-templated;GO:0010038//response to metal ion	K09422//myb proto-oncogene protein, plant	gi|700206482|gb|KGN61601.1|//hypothetical protein Csa_2G174670 [Cucumis sativus];gi|449458822|ref|XP_004147145.1|//PREDICTED: myb-related protein Myb4-like [Cucumis sativus]
Csa7G072780	783	1.64	97.46	5.89304250257423	2.2166e-160	1.62211787969925e-158	Up	NA	NA	NA	NA	gi|700188658|gb|KGN43891.1|//NtPRp27-like protein [Cucumis sativus]
Csa3G154350	2715	0.01	0.59	5.88264304936184	0.0001285256	0.000383488554506438	Up	NA	NA	NA	K17964//leucine-rich PPR motif-containing protein, mitochondrial	gi|449432854|ref|XP_004134213.1|//PREDICTED: pentatricopeptide repeat-containing protein At3g06920 [Cucumis sativus]
Csa5G605140	723	0.18	10.56	5.87446911791614	6.6827e-17	5.15598248910028e-16	Up	NA	GO:0016892//endoribonuclease activity, producing 3'-phosphomonoesters;GO:0003676//nucleic acid binding	NA	K01166//ribonuclease T2 [EC:3.1.27.1]	gi|449435342|ref|XP_004135454.1|//PREDICTED: ribonuclease 1-like [Cucumis sativus]
Csa1G696520	1180	3.85	218.45	5.82630084974932	0	0	Up	GO:0016021//integral component of membrane	GO:0003824//catalytic activity	GO:0009116//nucleoside metabolic process	NA	gi|778664433|ref|XP_011660294.1|//PREDICTED: bark storage protein A [Cucumis sativus]
Csa3G850570	2676	0.09	5.01	5.7987417917529	9.46532e-31	1.23245430849498e-29	Up	NA	GO:0016740//transferase activity	NA	K04733//interleukin-1 receptor-associated kinase 4 [EC:2.7.11.1];K16224//senescence-induced receptor-like serine/threonine-protein kinase	gi|700204719|gb|KGN59852.1|//hypothetical protein Csa_3G850570 [Cucumis sativus]
Csa4G012390	648	0.60	30.10	5.64865717603855	1.796764e-40	3.01255883066322e-39	Up	NA	NA	NA	K18835//WRKY transcription factor 2;K13424//WRKY transcription factor 33	gi|778689952|ref|XP_004152302.2|//PREDICTED: probable WRKY transcription factor 75 [Cucumis sativus]
Csa3G606620	2749	0.26	12.56	5.59418103075053	5.11974e-70	1.4919290245509e-68	Up	NA	NA	NA	K05391//cyclic nucleotide gated channel, other eukaryote	gi|778681891|ref|XP_011651603.1|//PREDICTED: cyclic nucleotide-gated ion channel 1-like isoform X1 [Cucumis sativus];gi|778681894|ref|XP_011651604.1|//PREDICTED: cyclic nucleotide-gated ion channel 1-like isoform X2 [Cucumis sativus];gi|700203145|gb|KGN58278.1|//hypothetical protein Csa_3G606620 [Cucumis sativus]
Csa3G747620	1424	0.11	5.29	5.58769229347673	1.737306e-17	1.37194314791075e-16	Up	NA	GO:0016706//oxidoreductase activity, acting on paired donors, with incorporation or reduction of molecular oxygen, 2-oxoglutarate as one donor, and incorporation of one atom each of oxygen into both donors;GO:0005506//iron ion binding;GO:0016491//oxidoreductase activity	GO:0009058//biosynthetic process;GO:0055114//oxidation-reduction process	K18054//2'-deoxymugineic-acid 2'-dioxygenase / mugineic-acid 3-dioxygenase [EC:1.14.11.24 1.14.11.25];K05277//leucoanthocyanidin dioxygenase [EC:1.14.11.19];K06892//feruloyl-CoA ortho-hydroxylase [EC:1.14.11.-]	gi|449440447|ref|XP_004137996.1|//PREDICTED: 2'-deoxymugineic-acid 2'-dioxygenase [Cucumis sativus]
Csa1G042350	1276	1.07	50.89	5.57169948957605	2.78622e-138	1.73279739680511e-136	Up	NA	NA	NA	K09422//myb proto-oncogene protein, plant	gi|700209027|gb|KGN64123.1|//hypothetical protein Csa_1G042350 [Cucumis sativus];gi|449439407|ref|XP_004137477.1|//PREDICTED: transcription factor MYB108-like [Cucumis sativus]
Csa7G419590	1929	1.71	81.30	5.57118712207649	0	0	Up	NA	NA	NA	NA	gi|449436369|ref|XP_004135965.1|//PREDICTED: uncharacterized protein LOC101214858 [Cucumis sativus]
Csa2G129170	660	0.20	9.50	5.56985560833095	1.081156e-13	7.06946009271078e-13	Up	GO:0031090//organelle membrane;GO:0005635//nuclear envelope	GO:0005488//binding	GO:0009725//response to hormone;GO:0006405//RNA export from nucleus	K08511//vesicle-associated membrane protein 72	gi|449442369|ref|XP_004138954.1|//PREDICTED: vesicle-associated membrane protein 722-like [Cucumis sativus]
Csa1G537320	1605	0.31	14.62	5.55953128556556	2.42218e-51	5.0699092344086e-50	Up	NA	NA	GO:0044238//primary metabolic process	K16818//phospholipase A1 [EC:3.1.1.32]	gi|449435504|ref|XP_004135535.1|//PREDICTED: phospholipase A1-Igamma1, chloroplastic [Cucumis sativus]
Csa4G628870	762	0.07	3.29	5.55458885167764	2.05306e-06	7.57915151905936e-06	Up	NA	NA	NA	K05387//glutamate receptor, ionotropic, plant	gi|778695791|ref|XP_004146035.2|//PREDICTED: glutamate receptor 2.8-like isoform X2 [Cucumis sativus]
Csa6G504440	1501	0.48	21.86	5.50911518495075	2.41102e-70	7.06821013855422e-69	Up	NA	GO:0005524//ATP binding;GO:0000166//nucleotide binding	NA	K08900//mitochondrial chaperone BCS1	gi|778719538|ref|XP_004150005.2|//PREDICTED: probable mitochondrial chaperone bcs1 [Cucumis sativus];gi|700193659|gb|KGN48863.1|//hypothetical protein Csa_6G504440 [Cucumis sativus]
Csa6G446280	1423	0.36	16.01	5.47483259107395	1.507342e-35	2.23302278325723e-34	Up	GO:0005737//cytoplasm	GO:0045548//phenylalanine ammonia-lyase activity	GO:0009800//cinnamic acid biosynthetic process;GO:0006559//L-phenylalanine catabolic process	K10775//phenylalanine ammonia-lyase [EC:4.3.1.24]	gi|700192962|gb|KGN48166.1|//hypothetical protein Csa_6G446280 [Cucumis sativus];gi|659096694|ref|XP_008449236.1|//PREDICTED: phenylalanine ammonia-lyase-like [Cucumis melo]
Csa1G575130	945	0.80	35.35	5.4655664048094	7.27972e-70	2.11503029134328e-68	Up	GO:0044424//intracellular part	GO:0016701//oxidoreductase activity, acting on single donors with incorporation of molecular oxygen;GO:0046914//transition metal ion binding	GO:0006020//inositol metabolic process	K00469//inositol oxygenase [EC:1.13.99.1]	gi|778662817|ref|XP_011659961.1|//PREDICTED: inositol oxygenase 2 [Cucumis sativus]
Csa2G354940	3012	0.08	3.48	5.44294349584873	9.08294e-24	9.58311707533875e-23	Up	NA	GO:0016301//kinase activity	NA	K13428//LRR receptor-like serine/threonine-protein kinase EFR [EC:2.7.11.1];K13420//LRR receptor-like serine/threonine-protein kinase FLS2 [EC:2.7.11.1]	gi|449450540|ref|XP_004143020.1|//PREDICTED: putative receptor-like protein kinase At3g47110 [Cucumis sativus]
Csa1G589140	1739	0.38	15.83	5.3805180266936	3.59744e-60	8.87550913054499e-59	Up	NA	NA	NA	K13422//transcription factor MYC2	gi|778663004|ref|XP_011659992.1|//PREDICTED: putative transcription factor bHLH041 isoform X1 [Cucumis sativus];gi|700211160|gb|KGN66256.1|//hypothetical protein Csa_1G589140 [Cucumis sativus];gi|778663007|ref|XP_011659993.1|//PREDICTED: putative transcription factor bHLH041 isoform X2 [Cucumis sativus]
Csa3G717370	1218	0.94	37.22	5.30727348838151	2.61552e-99	1.12890714678492e-97	Up	NA	GO:0048037//cofactor binding;GO:0003824//catalytic activity;GO:0050662//coenzyme binding	GO:0008152//metabolic process	K09753//cinnamoyl-CoA reductase [EC:1.2.1.44]	gi|778682981|ref|XP_011651822.1|//PREDICTED: cinnamoyl-CoA reductase 2-like isoform X3 [Cucumis sativus];gi|700203533|gb|KGN58666.1|//hypothetical protein Csa_3G717370 [Cucumis sativus];gi|778682978|ref|XP_011651821.1|//PREDICTED: cinnamoyl-CoA reductase 2-like isoform X2 [Cucumis sativus]
Csa2G006880	1011	1.00	39.23	5.29388543030237	5.14968e-82	1.76796597671958e-80	Up	NA	NA	NA	NA	gi|778666119|ref|XP_004139412.2|//PREDICTED: blue copper protein-like [Cucumis sativus]
Csa2G173040	360	0.13	4.89	5.23325093681114	0.000256106	0.000729493619549312	Up	NA	NA	NA	NA	gi|700206466|gb|KGN61585.1|//hypothetical protein Csa_2G173040 [Cucumis sativus]
Csa3G099630	600	1.09	40.50	5.21552186788242	4.97098e-48	9.82386768324873e-47	Up	NA	NA	NA	K14006//protein transport protein SEC23	gi|778676237|ref|XP_011650553.1|//PREDICTED: protein PLANT CADMIUM RESISTANCE 8 [Cucumis sativus]
Csa4G064650	663	11.00	394.23	5.16346213748432	0	0	Up	NA	GO:0016765//transferase activity, transferring alkyl or aryl (other than methyl) groups	GO:0009755//hormone-mediated signaling pathway	K00799//glutathione S-transferase [EC:2.5.1.18]	gi|449460060|ref|XP_004147764.1|//PREDICTED: probable glutathione S-transferase parC isoform X1 [Cucumis sativus]
Csa6G492230	1494	5.62	200.03	5.15350244735596	0	0	Up	NA	NA	NA	K00517;K13260//isoflavone 2'-hydroxylase [EC:1.14.13.89]	gi|778718513|ref|XP_011657880.1|//PREDICTED: cytochrome P450 81E8 [Cucumis sativus]
Csa3G778280	819	0.62	21.65	5.12595499922721	5.06838e-36	7.59515666512702e-35	Up	NA	NA	NA	K13070//momilactone-A synthase [EC:1.1.1.295];K09841//xanthoxin dehydrogenase [EC:1.1.1.288]	gi|778684389|ref|XP_004136701.2|//PREDICTED: secoisolariciresinol dehydrogenase-like [Cucumis sativus]
Csa3G910670	768	0.84	29.16	5.11745758154818	3.73886e-45	6.93149035809524e-44	Up	NA	NA	NA	NA	gi|449461545|ref|XP_004148502.1|//PREDICTED: expansin-like B1 [Cucumis sativus]
Csa3G076020	1191	1.78	61.58	5.11251272107842	2.72738e-119	1.43878534092141e-117	Up	NA	GO:0004462//lactoylglutathione lyase activity;GO:0046872//metal ion binding	NA	K01759//lactoylglutathione lyase [EC:4.4.1.5]	gi|778676057|ref|XP_011650522.1|//PREDICTED: lactoylglutathione lyase-like [Cucumis sativus];gi|700200981|gb|KGN56114.1|//hypothetical protein Csa_3G076010 [Cucumis sativus]
Csa2G420990	1731	0.92	31.55	5.0998623338129	1.91001e-113	9.46062459541985e-112	Up	GO:0005777//peroxisome	GO:0016833//oxo-acid-lyase activity	GO:0044262//cellular carbohydrate metabolic process;GO:0043436//oxoacid metabolic process;GO:0009060//aerobic respiration	K01637//isocitrate lyase [EC:4.1.3.1]	gi|449468341|ref|XP_004151880.1|//PREDICTED: isocitrate lyase [Cucumis sativus]
Csa6G338110	705	6.79	232.45	5.09736504116159	0	0	Up	NA	NA	NA	NA	gi|778714887|ref|XP_011657303.1|//PREDICTED: pathogen-related protein [Cucumis sativus]
Csa3G182150	621	2.53	85.15	5.0727972398716	4.76682e-102	2.09934203891403e-100	Up	NA	NA	NA	NA	gi|449446033|ref|XP_004140776.1|//PREDICTED: uncharacterized protein LOC101216404 [Cucumis sativus]
Csa4G640960	1365	1.36	45.50	5.06418798872308	4.68028e-127	2.64843983953488e-125	Up	NA	NA	NA	K13065//shikimate O-hydroxycinnamoyltransferase [EC:2.3.1.133];K11714//rhamnogalacturonan II specific xylosyltransferase [EC:2.4.2.-]	gi|778696188|ref|XP_011654118.1|//PREDICTED: uncharacterized acetyltransferase At3g50280-like [Cucumis sativus]
Csa6G518170	693	0.56	18.57	5.05140317787782	5.13626e-26	5.79944531090487e-25	Up	GO:0043231//intracellular membrane-bounded organelle	GO:0001071//nucleic acid binding transcription factor activity	NA	NA	gi|778720964|ref|XP_004134944.2|//PREDICTED: NAC domain-containing protein 8-like [Cucumis sativus]
Csa4G286960	2731	1.40	46.23	5.04533063029097	1.750492e-272	2.48723191766423e-270	Up	NA	GO:0016491//oxidoreductase activity	GO:0008610//lipid biosynthetic process	K00454//lipoxygenase [EC:1.13.11.12]	gi|700198965|gb|KGN54123.1|//hypothetical protein Csa_4G286960 [Cucumis sativus];gi|778693086|ref|XP_004142240.2|//PREDICTED: linoleate 13S-lipoxygenase 2-1, chloroplastic-like [Cucumis sativus]
Csa7G430240	1629	0.30	9.87	5.04001567884788	9.9996e-34	1.41257049056604e-32	Up	NA	GO:0003824//catalytic activity	NA	K01904//4-coumarate--CoA ligase [EC:6.2.1.12]	gi|778728825|ref|XP_004135894.2|//PREDICTED: 4-coumarate--CoA ligase 2-like [Cucumis sativus]
Csa1G024860	675	4.81	157.37	5.03197983677503	1.532848e-204	1.42767555827751e-202	Up	NA	GO:0016846//carbon-sulfur lyase activity	NA	K00799//glutathione S-transferase [EC:2.5.1.18]	gi|449439109|ref|XP_004137330.1|//PREDICTED: probable glutathione S-transferase [Cucumis sativus]
Csa6G055940	1215	0.31	10.14	5.03164562661647	5.13626e-26	5.80281121067905e-25	Up	NA	NA	NA	K09286//EREBP-like factor	gi|449446496|ref|XP_004141007.1|//PREDICTED: ethylene-responsive transcription factor ABR1-like [Cucumis sativus]
Csa3G710830	1131	0.06	1.94	5.01495034146597	8.152e-06	2.82965106990014e-05	Up	NA	NA	NA	K05674//ATP-binding cassette, subfamily C (CFTR/MRP), member 10	gi|700203523|gb|KGN58656.1|//hypothetical protein Csa_3G710830 [Cucumis sativus]
Csa6G507250	1710	0.43	13.83	5.0073206864484	2.11396e-49	4.27758267775468e-48	Up	GO:0031224//intrinsic component of membrane	GO:0016787//hydrolase activity	NA	K00924;K01381//saccharopepsin [EC:3.4.23.25]	gi|700193747|gb|KGN48951.1|//hypothetical protein Csa_6G507250 [Cucumis sativus]
Csa2G177210	687	0.75	23.86	4.99155963719935	1.397266e-32	1.91813680930889e-31	Up	NA	NA	NA	K14516//ethylene-responsive transcription factor 1	gi|449466538|ref|XP_004150983.1|//PREDICTED: ethylene-responsive transcription factor 1B-like [Cucumis sativus]
Csa2G151580	858	0.10	3.16	4.98185265328974	1.687088e-06	6.28894197778629e-06	Up	NA	NA	NA	K02940//large subunit ribosomal protein L9e;K07874//Ras-related protein Rab-1A;K01623//fructose-bisphosphate aldolase, class I [EC:4.1.2.13]	gi|778668524|ref|XP_011649111.1|//PREDICTED: WAT1-related protein At1g25270-like [Cucumis sativus];gi|700206399|gb|KGN61518.1|//hypothetical protein Csa_2G151580 [Cucumis sativus]
Csa4G051470	1806	0.95	29.51	4.95713259710106	6.30162e-99	2.70788818807947e-97	Up	NA	GO:0043565//sequence-specific DNA binding;GO:0003700//transcription factor activity, sequence-specific DNA binding	GO:0006355//regulation of transcription, DNA-templated	K18835//WRKY transcription factor 2;K13426//WRKY transcription factor 29;K13425//WRKY transcription factor 22;K16225//probable WRKY transcription factor 52	gi|449464068|ref|XP_004149751.1|//PREDICTED: probable WRKY transcription factor 41 [Cucumis sativus]
Csa1G064850	948	2.13	65.65	4.94586967555441	5.45726e-123	2.99242318760563e-121	Up	NA	NA	NA	K04733//interleukin-1 receptor-associated kinase 4 [EC:2.7.11.1];K04730//interleukin-1 receptor-associated kinase 1 [EC:2.7.11.1]	gi|778658527|ref|XP_004153533.2|//PREDICTED: cysteine-rich receptor-like protein kinase 25 [Cucumis sativus]
Csa2G010150	420	0.98	30.15	4.94323244267224	1.001848e-23	1.05359120302539e-22	Up	NA	NA	NA	NA	gi|700205660|gb|KGN60779.1|//hypothetical protein Csa_2G010150 [Cucumis sativus]
Csa1G533650	963	0.26	7.74	4.89575003800332	1.049312e-15	7.65301888047958e-15	Up	NA	NA	NA	K00430//peroxidase [EC:1.11.1.7]	gi|700210762|gb|KGN65858.1|//hypothetical protein Csa_1G533650 [Cucumis sativus]
Csa4G297420	891	0.14	4.14	4.88613203544172	3.31668e-08	1.46799665484311e-07	Up	NA	NA	NA	K06758;K03283//heat shock 70kDa protein 1/8	gi|449448874|ref|XP_004142190.1|//PREDICTED: uncharacterized protein LOC101223041 [Cucumis sativus]
Csa5G515040	714	0.84	24.68	4.87680925637066	1.316212e-39	2.15124960470193e-38	Up	GO:0016020//membrane	NA	NA	NA	gi|700196122|gb|KGN51299.1|//hypothetical protein Csa_5G515040 [Cucumis sativus];gi|659117979|ref|XP_008458887.1|//PREDICTED: CASP-like protein RCOM_1206790 [Cucumis melo]
Csa6G508020	1083	1.27	36.69	4.85248650247638	6.0641e-79	1.97728258961474e-77	Up	NA	GO:0004553//hydrolase activity, hydrolyzing O-glycosyl compounds;GO:0030247//polysaccharide binding	GO:0006026//aminoglycan catabolic process	K01183//chitinase [EC:3.2.1.14]	gi|700193776|gb|KGN48980.1|//hypothetical protein Csa_6G508020 [Cucumis sativus]
Csa4G017200	249	1.24	35.50	4.83940699889253	7.52486e-15	5.23139017e-14	Up	NA	NA	NA	NA	gi|700197974|gb|KGN53132.1|//Aconitate hydratase [Cucumis sativus]
Csa1G589650	1608	1.00	28.49	4.83238371654913	1.42e-92	5.64116734693878e-91	Up	NA	NA	NA	NA	gi|449452739|ref|XP_004144116.1|//PREDICTED: uncharacterized protein LOC101207749 [Cucumis sativus]
Csa1G033160	765	3.79	107.91	4.83148690668544	5.76948e-159	4.19062304776119e-157	Up	NA	GO:0003824//catalytic activity;GO:0016740//transferase activity	NA	K00799//glutathione S-transferase [EC:2.5.1.18]	gi|778656835|ref|XP_004151688.2|//PREDICTED: glutathione S-transferase U9-like [Cucumis sativus]
Csa4G008760	2006	2.11	59.73	4.82314081773447	5.96224e-253	7.48780411870967e-251	Up	GO:0044424//intracellular part;GO:0005737//cytoplasm	GO:0016840//carbon-nitrogen lyase activity;GO:0045548//phenylalanine ammonia-lyase activity	GO:0006558//L-phenylalanine metabolic process;GO:0009800//cinnamic acid biosynthetic process;GO:0006559//L-phenylalanine catabolic process	K10775//phenylalanine ammonia-lyase [EC:4.3.1.24]	gi|700197815|gb|KGN52973.1|//hypothetical protein Csa_4G008760 [Cucumis sativus];gi|778689757|ref|XP_011653013.1|//PREDICTED: phenylalanine ammonia-lyase-like [Cucumis sativus]
Csa7G041870	1173	3.09	87.21	4.81881482895302	3.19098e-201	2.92998191886792e-199	Up	NA	NA	NA	NA	gi|449453535|ref|XP_004144512.1|//PREDICTED: cytochrome b561 and DOMON domain-containing protein At5g47530-like [Cucumis sativus]
Csa6G507520	963	1.57	43.56	4.79416748982528	4.61504e-82	1.58721499363958e-80	Up	NA	GO:0004553//hydrolase activity, hydrolyzing O-glycosyl compounds;GO:0030247//polysaccharide binding	GO:0006026//aminoglycan catabolic process	K01183//chitinase [EC:3.2.1.14]	gi|449434098|ref|XP_004134833.1|//PREDICTED: endochitinase-like [Cucumis sativus]
Csa5G210010	306	0.48	13.14	4.77478705960117	1.23465e-07	5.18974236665947e-07	Up	NA	NA	NA	K19038//E3 ubiquitin-protein ligase ATL41 [EC:2.3.2.27]	gi|700195499|gb|KGN50676.1|//hypothetical protein Csa_5G210010 [Cucumis sativus]
Csa5G168880	177	0.98	26.31	4.74668568905068	2.37824e-07	9.68916279614902e-07	Up	NA	NA	NA	NA	gi|700195174|gb|KGN50351.1|//hypothetical protein Csa_5G168880 [Cucumis sativus]
Csa7G073520	648	2.41	62.02	4.68562847438266	5.65718e-75	1.75075780413355e-73	Up	NA	NA	NA	NA	gi|449438390|ref|XP_004136971.1|//PREDICTED: CBS domain-containing protein CBSX2, chloroplastic [Cucumis sativus]
Csa4G000860	213	1.52	39.07	4.68391802674009	3.80912e-13	2.41840606392694e-12	Up	NA	NA	NA	NA	gi|700197609|gb|KGN52767.1|//hypothetical protein Csa_4G000860 [Cucumis sativus]
Csa7G048060	870	0.15	3.81	4.6667565918848	2.37824e-07	9.68713535049173e-07	Up	NA	NA	NA	NA	gi|449438498|ref|XP_004137025.1|//PREDICTED: uncharacterized protein LOC101216632 [Cucumis sativus]
Csa6G517310	594	0.22	5.57	4.66210189870273	4.57562e-07	1.80557508453274e-06	Up	NA	NA	NA	K09419//heat shock transcription factor, other eukaryote	gi|778720797|ref|XP_011658207.1|//PREDICTED: heat stress transcription factor B-2a-like [Cucumis sativus]
Csa3G199590	660	0.20	4.95	4.62935662007961	4.57562e-07	1.80520913903527e-06	Up	NA	NA	NA	K09422//myb proto-oncogene protein, plant	gi|449446099|ref|XP_004140809.1|//PREDICTED: transcription factor MYB44-like [Cucumis sativus]
Csa4G290200	1506	1.97	48.74	4.62883871626696	2.19338e-143	1.4424437527027e-141	Up	NA	GO:0016758//transferase activity, transferring hexosyl groups	NA	K13496//UDP-glucosyl transferase 73C [EC:2.4.1.-]	gi|449448950|ref|XP_004142228.1|//PREDICTED: UDP-glycosyltransferase 92A1 [Cucumis sativus]
Csa2G055050	1629	1.81	44.53	4.6207160093597	5.6566e-142	3.68265470234114e-140	Up	NA	NA	NA	K08248//mandelonitrile lyase [EC:4.1.2.10]	gi|700205998|gb|KGN61117.1|//hypothetical protein Csa_2G055050 [Cucumis sativus]
Csa6G007450	1398	1.86	45.70	4.6188196388374	2.19726e-124	1.2185716e-122	Up	NA	GO:0016740//transferase activity	NA	K12338//anthocyanidin 3-O-glucoside 5-O-glucosyltransferase [EC:2.4.1.298]	gi|778709244|ref|XP_011656370.1|//PREDICTED: crocetin glucosyltransferase, chloroplastic-like [Cucumis sativus]
Csa3G386830	1323	0.09	2.15	4.57826784814715	1.687088e-06	6.29135153409962e-06	Up	GO:0043231//intracellular membrane-bounded organelle	GO:0003676//nucleic acid binding	NA	K09422//myb proto-oncogene protein, plant	gi|449468552|ref|XP_004151985.1|//PREDICTED: myb-related protein Myb4-like [Cucumis sativus];gi|700202777|gb|KGN57910.1|//hypothetical protein Csa_3G386830 [Cucumis sativus]
Csa4G304760	663	1.64	38.67	4.55944704446472	5.47472e-48	1.08084076592292e-46	Up	NA	NA	NA	K00799//glutathione S-transferase [EC:2.5.1.18]	gi|778693631|ref|XP_004147931.2|//PREDICTED: probable glutathione S-transferase [Cucumis sativus]
Csa6G398210	1050	1.56	36.37	4.54313099159337	4.88026e-73	1.47743609891135e-71	Up	NA	NA	NA	NA	gi|700192540|gb|KGN47744.1|//hypothetical protein Csa_6G398210 [Cucumis sativus]
Csa2G297760	858	0.30	6.98	4.54019263060113	2.68556e-12	1.61448767634342e-11	Up	NA	NA	NA	K09286//EREBP-like factor	gi|700206984|gb|KGN62103.1|//hypothetical protein Csa_2G297760 [Cucumis sativus]
Csa6G013940	798	0.16	3.70	4.53138146051631	1.687088e-06	6.29014652518675e-06	Up	NA	GO:0016209//antioxidant activity;GO:0005506//iron ion binding;GO:0003824//catalytic activity	GO:0008152//metabolic process;GO:0006950//response to stress	K00430//peroxidase [EC:1.11.1.7]	gi|700190618|gb|KGN45822.1|//hypothetical protein Csa_6G013940 [Cucumis sativus]
Csa3G133380	675	15.00	330.95	4.4635788649726	0	0	Up	NA	GO:0016829//lyase activity	NA	K00799//glutathione S-transferase [EC:2.5.1.18]	gi|778678021|ref|XP_011650902.1|//PREDICTED: probable glutathione S-transferase [Cucumis sativus]
Csa5G608210	501	0.54	11.88	4.4594316186373	1.880094e-11	1.07168110699854e-10	Up	NA	NA	NA	K03574//8-oxo-dGTP diphosphatase [EC:3.6.1.55]	gi|449434676|ref|XP_004135122.1|//PREDICTED: nudix hydrolase 1-like [Cucumis sativus]
Csa3G889870	534	0.75	16.32	4.44360665147562	2.34238e-16	1.76526399845141e-15	Up	NA	NA	NA	NA	gi|778687441|ref|XP_011652564.1|//PREDICTED: uncharacterized protein LOC105435032 [Cucumis sativus]
Csa2G360700	1470	0.17	3.69	4.44001416481006	1.880094e-11	1.07199501476274e-10	Up	NA	NA	NA	K14638//solute carrier family 15 (peptide/histidine transporter), member 3/4	gi|700207434|gb|KGN62553.1|//hypothetical protein Csa_2G360700 [Cucumis sativus]
Csa5G155520	1989	0.06	1.29	4.4262647547021	6.1837e-06	2.16886313873874e-05	Up	NA	NA	NA	NA	gi|700194964|gb|KGN50141.1|//hypothetical protein Csa_5G155520 [Cucumis sativus]
Csa4G008250	768	1.96	41.98	4.42077660717695	5.52014e-60	1.35333810125945e-58	Up	GO:0044424//intracellular part	GO:0016840//carbon-nitrogen lyase activity	GO:0006558//L-phenylalanine metabolic process	K10775//phenylalanine ammonia-lyase [EC:4.3.1.24]	gi|700197813|gb|KGN52971.1|//hypothetical protein Csa_4G008250 [Cucumis sativus]
Csa6G423480	1959	0.31	6.60	4.41212590385894	7.88548e-26	8.86251464665127e-25	Up	NA	GO:0016641//oxidoreductase activity, acting on the CH-NH2 group of donors, oxygen as acceptor;GO:0046914//transition metal ion binding;GO:0048037//cofactor binding	GO:0006807//nitrogen compound metabolic process	K00276//primary-amine oxidase [EC:1.4.3.21]	gi|449444991|ref|XP_004140257.1|//PREDICTED: primary amine oxidase [Cucumis sativus]
Csa5G515020	495	5.97	126.19	4.40172284592658	1.356476e-107	6.31702435789474e-106	Up	NA	NA	NA	NA	gi|449450002|ref|XP_004142753.1|//PREDICTED: CASP-like protein 4D1 [Cucumis sativus]
Csa1G033130	708	0.55	11.49	4.38480336912145	1.622132e-15	1.17297256731055e-14	Up	NA	GO:0003824//catalytic activity	NA	K00799//glutathione S-transferase [EC:2.5.1.18]	gi|778656829|ref|XP_004137582.2|//PREDICTED: glutathione S-transferase U9-like [Cucumis sativus]
Csa6G518160	1026	0.49	10.05	4.35826994195108	4.03886e-20	3.63478727508091e-19	Up	NA	NA	NA	K04730//interleukin-1 receptor-associated kinase 1 [EC:2.7.11.1]	gi|449434322|ref|XP_004134945.1|//PREDICTED: serine/threonine-protein kinase CDL1 [Cucumis sativus]
Csa3G598370	1524	1.05	21.21	4.33628338786443	5.37166e-56	1.22584681781946e-54	Up	GO:0031224//intrinsic component of membrane;GO:0016021//integral component of membrane	NA	GO:0006810//transport;GO:0051234//establishment of localization	K15102//solute carrier family 25 (mitochondrial phosphate transporter), member 3	gi|449455920|ref|XP_004145698.1|//PREDICTED: mitochondrial phosphate carrier protein 3, mitochondrial-like [Cucumis sativus];gi|700203107|gb|KGN58240.1|//hypothetical protein Csa_3G598370 [Cucumis sativus]
Csa3G827930	396	0.35	7.04	4.33014860169233	2.2508e-05	7.4235975601491e-05	Up	NA	NA	NA	K08900//mitochondrial chaperone BCS1	gi|700204469|gb|KGN59602.1|//hypothetical protein Csa_3G827930 [Cucumis sativus]
Csa5G155440	444	0.31	6.21	4.32425314783361	1.180872e-05	4.01938352019584e-05	Up	NA	NA	NA	NA	gi|700194956|gb|KGN50133.1|//hypothetical protein Csa_5G155440 [Cucumis sativus]
Csa1G065920	2286	3.09	61.80	4.32192809488736	5.92562e-266	7.95504268413793e-264	Up	NA	NA	NA	K04733//interleukin-1 receptor-associated kinase 4 [EC:2.7.11.1];K04730//interleukin-1 receptor-associated kinase 1 [EC:2.7.11.1]	gi|700209476|gb|KGN64572.1|//hypothetical protein Csa_1G065920 [Cucumis sativus];gi|778664884|ref|XP_011648428.1|//PREDICTED: uncharacterized protein LOC101218966 [Cucumis sativus]
Csa1G033120	911	16.00	317.79	4.31192991742719	0	0	Up	NA	GO:0016740//transferase activity	NA	K00799//glutathione S-transferase [EC:2.5.1.18]	gi|778656826|ref|XP_004137407.2|//PREDICTED: glutathione S-transferase U9-like [Cucumis sativus]
Csa2G096930	2916	0.04	0.79	4.3037807481771	2.2508e-05	7.42485558379936e-05	Up	NA	NA	NA	K13459//disease resistance protein RPS2	gi|700206237|gb|KGN61356.1|//hypothetical protein Csa_2G096930 [Cucumis sativus]
Csa2G057070	1644	0.30	5.90	4.29768054864069	2.77514e-19	2.38819077099912e-18	Up	NA	NA	NA	K08248//mandelonitrile lyase [EC:4.1.2.10]	gi|778667418|ref|XP_011648924.1|//PREDICTED: (R)-mandelonitrile lyase 1-like [Cucumis sativus]
Csa4G608170	1352	0.11	2.16	4.29545588352617	8.7921e-07	3.37901320039487e-06	Up	NA	NA	NA	K12581//CCR4-NOT transcription complex subunit 7/8;K02437//glycine cleavage system H protein;K00162//pyruvate dehydrogenase E1 component beta subunit [EC:1.2.4.1];K13126//polyadenylate-binding protein;K01054//acylglycerol lipase [EC:3.1.1.23]	gi|449453868|ref|XP_004144678.1|//PREDICTED: transcription factor JUNGBRUNNEN 1 [Cucumis sativus];gi|700199783|gb|KGN54941.1|//hypothetical protein Csa_4G608170 [Cucumis sativus]
Csa6G085120	1845	0.33	6.42	4.28203536776385	4.85586e-23	4.96450476680672e-22	Up	NA	NA	NA	NA	gi|778722042|ref|XP_004140683.2|//PREDICTED: uncharacterized protein LOC101212952 [Cucumis sativus]
Csa1G414240	1023	0.49	9.47	4.27251077135318	1.000152e-18	8.37014567153912e-18	Up	NA	NA	NA	NA	gi|778660636|ref|XP_004151455.2|//PREDICTED: uncharacterized protein LOC101205468 [Cucumis sativus]
Csa4G641590	450	1.51	29.03	4.26492411730158	9.20676e-23	9.30040426362221e-22	Up	GO:0043231//intracellular membrane-bounded organelle	GO:0001071//nucleic acid binding transcription factor activity;GO:0003676//nucleic acid binding	GO:0006351//transcription, DNA-templated	K09286//EREBP-like factor	gi|449447039|ref|XP_004141277.1|//PREDICTED: ethylene-responsive transcription factor ERF011-like [Cucumis sativus]
Csa5G155450	672	2.90	55.30	4.25315467510713	1.136384e-65	3.01785142482947e-64	Up	NA	NA	NA	K14297//nuclear pore complex protein Nup98-Nup96	gi|449452358|ref|XP_004143926.1|//PREDICTED: protein P21-like [Cucumis sativus]
Csa2G000420	1444	0.27	5.12	4.24511249783653	1.289574e-17	1.02168691428571e-16	Up	NA	NA	NA	K13422//transcription factor MYC2	gi|700205415|gb|KGN60534.1|//hypothetical protein Csa_2G000420 [Cucumis sativus];gi|659071355|ref|XP_008459381.1|//PREDICTED: putative transcription factor bHLH041 isoform X1 [Cucumis melo]
Csa5G165270	1458	0.17	3.21	4.23896664587196	8.98674e-10	4.54260921423007e-09	Up	NA	NA	NA	NA	gi|778700165|ref|XP_011654823.1|//PREDICTED: uncharacterized protein LOC105435447 [Cucumis sativus]
Csa3G133370	678	1.53	28.82	4.2354667774821	4.14226e-35	6.0855270309434e-34	Up	NA	GO:0016846//carbon-sulfur lyase activity	NA	K00799//glutathione S-transferase [EC:2.5.1.18]	gi|449433207|ref|XP_004134389.1|//PREDICTED: probable glutathione S-transferase [Cucumis sativus]
Csa5G173510	1962	0.12	2.25	4.22881869049588	6.12078e-09	2.89402728880253e-08	Up	NA	NA	NA	K13466//EIX receptor 1/2	gi|449451914|ref|XP_004143705.1|//PREDICTED: probable LRR receptor-like serine/threonine-protein kinase At4g36180 [Cucumis sativus];gi|700195247|gb|KGN50424.1|//hypothetical protein Csa_5G173510 [Cucumis sativus]
Csa4G038740	1416	0.23	4.28	4.21790503034413	6.56468e-12	3.85135807353828e-11	Up	NA	NA	NA	K12844//U4/U6 small nuclear ribonucleoprotein PRP31;K18999//RNA polymerase II C-terminal domain phosphatase-like 3/4 [EC:3.1.3.16]	gi|700198099|gb|KGN53257.1|//hypothetical protein Csa_4G038740 [Cucumis sativus]
Csa1G481720	468	0.29	5.26	4.18093799416473	4.28124e-05	0.00013655352751106	Up	NA	NA	NA	K14841//ribosome biogenesis protein NSA1	gi|700210574|gb|KGN65670.1|//hypothetical protein Csa_1G481720 [Cucumis sativus]
Csa6G104650	1071	0.23	4.17	4.18034161738765	1.705588e-09	8.42664365685279e-09	Up	NA	NA	NA	K02940//large subunit ribosomal protein L9e;K01623//fructose-bisphosphate aldolase, class I [EC:4.1.2.13]	gi|449464350|ref|XP_004149892.1|//PREDICTED: WAT1-related protein At4g30420-like [Cucumis sativus]
Csa3G446120	4428	1.93	34.79	4.17199992635181	4.1265e-288	6.275503828125e-286	Up	GO:0044464//cell part	GO:0032559//adenyl ribonucleotide binding;GO:0017111//nucleoside-triphosphatase activity	GO:0009207//purine ribonucleoside triphosphate catabolic process	K05681//ATP-binding cassette, subfamily G (WHITE), member 2	gi|700202902|gb|KGN58035.1|//hypothetical protein Csa_3G446120 [Cucumis sativus]
Csa2G357220	2679	0.05	0.90	4.16992500144231	1.180872e-05	4.01868083076923e-05	Up	NA	NA	NA	K05387//glutamate receptor, ionotropic, plant	gi|700207380|gb|KGN62499.1|//hypothetical protein Csa_2G357220 [Cucumis sativus]
Csa6G500640	1566	2.91	51.93	4.15747716717951	4.0237e-164	3.0595837578125e-162	Up	NA	NA	NA	K00423//L-ascorbate oxidase [EC:1.10.3.3]	gi|449451465|ref|XP_004143482.1|//PREDICTED: L-ascorbate oxidase [Cucumis sativus]
Csa7G237300	356	0.87	15.36	4.14201900487243	6.12078e-09	2.89473040524781e-08	Up	NA	NA	NA	NA	gi|778725970|ref|XP_011659032.1|//PREDICTED: cysteine-rich and transmembrane domain-containing protein A-like [Cucumis sativus]
Csa5G608390	1071	0.94	16.16	4.10362263107416	8.5778e-32	1.15076123225362e-30	Up	NA	NA	NA	K14491//two-component response regulator ARR-B family	gi|449434656|ref|XP_004135112.1|//PREDICTED: uncharacterized protein LOC101203539 [Cucumis sativus]
Csa5G593430	1302	1.34	22.96	4.09881773621792	1.759418e-54	3.92761820963303e-53	Up	NA	GO:0046872//metal ion binding	NA	K16280//E3 ubiquitin-protein ligase RGLG [EC:2.3.2.27]	gi|449435001|ref|XP_004135284.1|//PREDICTED: E3 ubiquitin-protein ligase RGLG2-like [Cucumis sativus]
BGI_novel_G000102	2666	0.51	8.72	4.09575898280543	7.8127e-44	1.41471644837209e-42	Up	GO:0009506//plasmodesma;GO:0016021//integral component of membrane	NA	GO:0055085//transmembrane transport	K14794//ribosomal RNA-processing protein 12	gi|778670267|ref|XP_004150375.2|//PREDICTED: uncharacterized protein LOC101208506 [Cucumis sativus]
BGI_novel_G000082	1356	0.55	9.40	4.09515723304034	5.01898e-24	5.32422150844687e-23	Up	NA	NA	NA	K14559//U3 small nucleolar RNA-associated protein MPP10	gi|700205905|gb|KGN61024.1|//hypothetical protein Csa_2G034770 [Cucumis sativus]
Csa3G792070	1047	2.04	34.68	4.08746284125034	7.61578e-65	2.01151660081411e-63	Up	NA	NA	NA	K10442//kelch-like protein 1/4/5;K10457//kelch-like protein 20;K10446//kelch-like protein 8;K10443//kelch-like protein 2/3	gi|778684667|ref|XP_004136552.2|//PREDICTED: F-box/kelch-repeat protein At2g44130-like [Cucumis sativus]
Csa4G639960	1395	2.22	37.30	4.07054404879249	1.485182e-93	5.94867341810699e-92	Up	NA	NA	NA	K15400//omega-hydroxypalmitate O-feruloyl transferase [EC:2.3.1.188];K13065//shikimate O-hydroxycinnamoyltransferase [EC:2.3.1.133];K11714//rhamnogalacturonan II specific xylosyltransferase [EC:2.4.2.-]	gi|449447257|ref|XP_004141385.1|//PREDICTED: uncharacterized acetyltransferase At3g50280-like [Cucumis sativus]
Csa7G073490	1434	0.17	2.84	4.06228427825434	2.18474e-08	9.85360260426321e-08	Up	NA	NA	NA	K13496//UDP-glucosyl transferase 73C [EC:2.4.1.-]	gi|778725052|ref|XP_004137109.2|//PREDICTED: scopoletin glucosyltransferase-like [Cucumis sativus]
Csa7G447970	1002	0.61	10.03	4.03936855304929	5.92474e-17	4.58026166957903e-16	Up	GO:0016021//integral component of membrane	GO:0008270//zinc ion binding	NA	K19038//E3 ubiquitin-protein ligase ATL41 [EC:2.3.2.27];K19041//E3 ubiquitin-protein ligase RNF38/44 [EC:2.3.2.27];K16286//E3 ubiquitin-protein ligase EL5 [EC:2.3.2.27]	gi|778729519|ref|XP_004141825.2|//PREDICTED: RING-H2 finger protein ATL60 [Cucumis sativus]
Csa3G706170	378	0.37	6.01	4.02176781508224	0.0001538098	0.000453920795451789	Up	NA	NA	NA	NA	gi|700203499|gb|KGN58632.1|//hypothetical protein Csa_3G706170 [Cucumis sativus]
Csa1G537480	1499	0.17	2.76	4.02106161552783	1.705588e-09	8.4245054574981e-09	Up	NA	GO:0016614//oxidoreductase activity, acting on CH-OH group of donors;GO:0050660//flavin adenine dinucleotide binding	GO:0055114//oxidation-reduction process	K00279//cytokinin dehydrogenase [EC:1.5.99.12]	gi|700210802|gb|KGN65898.1|//hypothetical protein Csa_1G537480 [Cucumis sativus];gi|449435882|ref|XP_004135723.1|//PREDICTED: reticuline oxidase-like protein [Cucumis sativus]
Csa4G628850	2928	0.46	7.41	4.00976777624882	1.47331e-43	2.66290180687094e-42	Up	NA	NA	NA	K05387//glutamate receptor, ionotropic, plant;K05208//glutamate receptor ionotropic, NMDA 1	gi|778695783|ref|XP_011654053.1|//PREDICTED: glutamate receptor 2.8-like [Cucumis sativus];gi|700199930|gb|KGN55088.1|//hypothetical protein Csa_4G628850 [Cucumis sativus]
Csa1G568480	1753	0.33	5.31	4.0081739314457	1.897006e-18	1.56206086277496e-17	Up	NA	NA	NA	NA	gi|778662270|ref|XP_011659631.1|//PREDICTED: uncharacterized protein LOC105436210 isoform X2 [Cucumis sativus];gi|700210923|gb|KGN66019.1|//hypothetical protein Csa_1G568480 [Cucumis sativus]
Csa2G069200	1290	0.27	4.33	4.00333571256326	1.53272e-10	8.18319460230389e-10	Up	NA	NA	NA	K00487//trans-cinnamate 4-monooxygenase [EC:1.14.13.11]	gi|778667679|ref|XP_011648970.1|//PREDICTED: cytochrome P450 CYP73A100-like [Cucumis sativus];gi|700206081|gb|KGN61200.1|//hypothetical protein Csa_2G069200 [Cucumis sativus]
Csa6G515490	2272	0.57	9.09	3.99524647002937	1.112462e-40	1.87328592491349e-39	Up	NA	NA	NA	K04733//interleukin-1 receptor-associated kinase 4 [EC:2.7.11.1];K04730//interleukin-1 receptor-associated kinase 1 [EC:2.7.11.1]	gi|700193936|gb|KGN49140.1|//hypothetical protein Csa_6G515490 [Cucumis sativus];gi|778720548|ref|XP_011658170.1|//PREDICTED: uncharacterized protein LOC101208368 [Cucumis sativus]
Csa6G401340	1011	3.49	55.55	3.9924879700668	1.319422e-97	5.57133810238612e-96	Up	NA	GO:0003824//catalytic activity	NA	K14493//gibberellin receptor GID1 [EC:3.-.-.-]	gi|449458071|ref|XP_004146771.1|//PREDICTED: probable carboxylesterase 15 [Cucumis sativus]
Csa3G730750	927	0.55	8.61	3.96850971387218	7.3287e-15	5.09865883488206e-14	Up	NA	GO:0004312//fatty acid synthase activity	GO:0008152//metabolic process	K09841//xanthoxin dehydrogenase [EC:1.1.1.288]	gi|449439827|ref|XP_004137687.1|//PREDICTED: short-chain dehydrogenase reductase 2a [Cucumis sativus]
Csa5G152250	387	3.60	55.50	3.94641895979516	8.52416e-34	1.20853094362709e-32	Up	NA	NA	NA	K12823//ATP-dependent RNA helicase DDX5/DBP2 [EC:3.6.4.13];K10572//inositol-pentakisphosphate 2-kinase [EC:2.7.1.158]	gi|449452278|ref|XP_004143886.1|//PREDICTED: uncharacterized protein LOC101213529 [Cucumis sativus]
Csa3G271380	1260	1.18	18.14	3.94231569116668	1.019634e-40	1.72143932732003e-39	Up	NA	NA	NA	K19476//vacuolar protein sorting-associated protein IST1	gi|778680668|ref|XP_011651369.1|//PREDICTED: uncharacterized protein LOC105434874 isoform X1 [Cucumis sativus]
Csa7G073500	1416	1.22	18.58	3.92879744881977	8.10852e-47	1.55968824426877e-45	Up	NA	NA	NA	K13496//UDP-glucosyl transferase 73C [EC:2.4.1.-]	gi|778725056|ref|XP_011658895.1|//PREDICTED: scopoletin glucosyltransferase-like [Cucumis sativus]
Csa3G002400	1788	0.82	12.16	3.8903755088255	9.89402e-35	1.43836440119492e-33	Up	NA	NA	NA	K00666//fatty-acyl-CoA synthase [EC:6.2.1.-];K01904//4-coumarate--CoA ligase [EC:6.2.1.12]	gi|778674647|ref|XP_004146208.2|//PREDICTED: probable acyl-activating enzyme 2 [Cucumis sativus]
Csa1G574960	2991	2.99	43.38	3.85881266347417	1.371982e-227	1.46741767098901e-225	Up	NA	NA	NA	K00924;K08286//protein-serine/threonine kinase [EC:2.7.11.-]	gi|778662766|ref|XP_004135674.2|//PREDICTED: receptor-like protein kinase 5 [Cucumis sativus]
Csa6G495000	990	13.88	200.88	3.85525446069324	0	0	Up	NA	GO:0016209//antioxidant activity;GO:0005506//iron ion binding;GO:0003824//catalytic activity	GO:0008152//metabolic process;GO:0006950//response to stress	K00430//peroxidase [EC:1.11.1.7]	gi|449448244|ref|XP_004141876.1|//PREDICTED: peroxidase 73-like [Cucumis sativus]
Csa6G522700	3471	1.25	17.85	3.83592407425438	1.965384e-109	9.35407455843521e-108	Up	NA	NA	NA	K13420//LRR receptor-like serine/threonine-protein kinase FLS2 [EC:2.7.11.1]	gi|449434266|ref|XP_004134917.1|//PREDICTED: LRR receptor-like serine/threonine-protein kinase FLS2 [Cucumis sativus]
Csa7G452200	2685	11.02	156.44	3.82741331216179	0	0	Up	NA	NA	NA	K04733//interleukin-1 receptor-associated kinase 4 [EC:2.7.11.1];K16224//senescence-induced receptor-like serine/threonine-protein kinase	gi|778729919|ref|XP_011659665.1|//PREDICTED: probable LRR receptor-like serine/threonine-protein kinase At1g51860 [Cucumis sativus]
Csa1G012100	1442	1.10	15.61	3.82689510845325	1.40948e-36	2.13683315264798e-35	Up	NA	NA	NA	K18211//synaptosomal-associated protein 25	gi|449440824|ref|XP_004138184.1|//PREDICTED: SNAP25 homologous protein SNAP33-like [Cucumis sativus]
Csa5G141040	2235	4.91	68.97	3.81217403712464	1.221742e-265	1.6289335460274e-263	Up	NA	NA	NA	K08653//membrane-bound transcription factor site-1 protease [EC:3.4.21.112];K13199//plasminogen activator inhibitor 1 RNA-binding protein;K11267//sister chromatid cohesion protein PDS5;K18443//golgi-specific brefeldin A-resistance guanine nucleotide exchange factor 1	gi|449456474|ref|XP_004145974.1|//PREDICTED: cucumisin-like [Cucumis sativus]
Csa6G309980	2313	11.37	158.27	3.79908365991689	0	0	Up	NA	GO:0015926//glucosidase activity	GO:0044238//primary metabolic process	K15920//beta-D-xylosidase 4 [EC:3.2.1.37]	gi|449466797|ref|XP_004151112.1|//PREDICTED: beta-D-xylosidase 1-like [Cucumis sativus]
Csa6G504450	1584	1.17	16.23	3.79408256496457	7.44852e-45	1.37564412068311e-43	Up	NA	GO:0016462//pyrophosphatase activity;GO:0032559//adenyl ribonucleotide binding	NA	K08900//mitochondrial chaperone BCS1	gi|778719538|ref|XP_004150005.2|//PREDICTED: probable mitochondrial chaperone bcs1 [Cucumis sativus]
Csa4G289120	2505	1.25	17.16	3.77904955283746	1.088212e-71	3.23901143608563e-70	Up	NA	NA	NA	K04733//interleukin-1 receptor-associated kinase 4 [EC:2.7.11.1];K00276//primary-amine oxidase [EC:1.4.3.21]	gi|778693113|ref|XP_011653580.1|//PREDICTED: G-type lectin S-receptor-like serine/threonine-protein kinase RLK1 [Cucumis sativus];gi|700198985|gb|KGN54143.1|//hypothetical protein Csa_4G289120 [Cucumis sativus];gi|700198986|gb|KGN54144.1|//hypothetical protein Csa_4G289620 [Cucumis sativus]
Csa3G081900	372	2.26	31.01	3.77833884819744	4.99078e-18	4.04456800499584e-17	Up	NA	NA	NA	K16465//centrin-1;K02183//calmodulin	gi|449470409|ref|XP_004152909.1|//PREDICTED: calcium-binding protein PBP1 [Cucumis sativus]
Csa6G445760	2142	1.88	25.27	3.74862109726714	9.1909e-94	3.68886720412371e-92	Up	GO:0044424//intracellular part	GO:0016840//carbon-nitrogen lyase activity	GO:0006558//L-phenylalanine metabolic process	K10775//phenylalanine ammonia-lyase [EC:4.3.1.24]	gi|449451016|ref|XP_004143258.1|//PREDICTED: phenylalanine ammonia-lyase-like [Cucumis sativus]
Csa2G406060	399	1.04	13.73	3.72267619200601	3.46392e-09	1.67192330076866e-08	Up	NA	GO:0003677//DNA binding;GO:0001071//nucleic acid binding transcription factor activity	GO:0010467//gene expression	K18835//WRKY transcription factor 2;K13424//WRKY transcription factor 33	gi|778673213|ref|XP_004138624.2|//PREDICTED: probable WRKY transcription factor 45 [Cucumis sativus]
Csa3G710870	928	2.53	32.74	3.69384503177984	2.49286e-50	5.12959965750528e-49	Up	NA	GO:0003677//DNA binding;GO:0001071//nucleic acid binding transcription factor activity	GO:0010467//gene expression	K18835//WRKY transcription factor 2;K13424//WRKY transcription factor 33;K18834//WRKY transcription factor 1	gi|700203527|gb|KGN58660.1|//hypothetical protein Csa_3G710870 [Cucumis sativus]
Csa6G420520	715	0.38	4.90	3.68871042555899	9.55624e-07	3.65896474901652e-06	Up	NA	NA	NA	K19038//E3 ubiquitin-protein ligase ATL41 [EC:2.3.2.27]	gi|449444961|ref|XP_004140242.1|//PREDICTED: RING-H2 finger protein ATL40-like, partial [Cucumis sativus];gi|700192752|gb|KGN47956.1|//hypothetical protein Csa_6G420520 [Cucumis sativus]
Csa3G118040	762	1.18	15.21	3.68816138836266	1.286708e-19	1.12621663345324e-18	Up	NA	NA	NA	K00344//NADPH2:quinone reductase [EC:1.6.5.5]	gi|449431980|ref|XP_004133778.1|//PREDICTED: uncharacterized protein LOC101221665 [Cucumis sativus]
Csa4G285780	1056	21.40	275.61	3.68694553277875	0	0	Up	NA	GO:0016209//antioxidant activity;GO:0005506//iron ion binding;GO:0003824//catalytic activity	GO:0008152//metabolic process;GO:0006950//response to stress	K00430//peroxidase [EC:1.11.1.7]	gi|700198944|gb|KGN54102.1|//Peroxidase [Cucumis sativus]
Csa2G074200	4378	0.66	8.49	3.68522662419459	4.46736e-63	1.15486892111554e-61	Up	GO:0016021//integral component of membrane	GO:0005524//ATP binding;GO:0042626//ATPase activity, coupled to transmembrane movement of substances	GO:0055085//transmembrane transport	K05658//ATP-binding cassette, subfamily B (MDR/TAP), member 1 [EC:3.6.3.44]	gi|700206139|gb|KGN61258.1|//hypothetical protein Csa_2G074200 [Cucumis sativus];gi|778667858|ref|XP_004152829.2|//PREDICTED: ABC transporter B family member 4-like [Cucumis sativus]
Csa1G573650	1137	4.51	57.27	3.66658026486971	1.673342e-106	7.68237626698113e-105	Up	NA	NA	NA	K09060//plant G-box-binding factor;K14432//ABA responsive element binding factor	gi|449435740|ref|XP_004135652.1|//PREDICTED: light-inducible protein CPRF2-like [Cucumis sativus]
Csa3G842740	333	17.66	223.45	3.66139479663391	1.42408e-103	6.38735974193548e-102	Up	NA	NA	NA	NA	gi|700204619|gb|KGN59752.1|//hypothetical protein Csa_3G842740 [Cucumis sativus]
Csa3G825010	633	0.41	5.18	3.65925628306847	3.31418e-06	1.19669500797626e-05	Up	NA	NA	NA	K02183//calmodulin	gi|700204423|gb|KGN59556.1|//Calcium-binding EF hand family protein [Cucumis sativus]
Csa2G433930	4356	3.86	48.15	3.64086304546274	0	0	Up	GO:0044464//cell part	GO:0015604//organic phosphonate transmembrane transporter activity;GO:0032559//adenyl ribonucleotide binding;GO:0042626//ATPase activity, coupled to transmembrane movement of substances	GO:0009207//purine ribonucleoside triphosphate catabolic process	K05681//ATP-binding cassette, subfamily G (WHITE), member 2	gi|700208259|gb|KGN63378.1|//hypothetical protein Csa_2G433930 [Cucumis sativus]
Csa2G070210	1268	0.29	3.61	3.6378740317596	2.20722e-08	9.94807699004399e-08	Up	NA	NA	NA	K00487//trans-cinnamate 4-monooxygenase [EC:1.14.13.11]	gi|700206084|gb|KGN61203.1|//hypothetical protein Csa_2G070210 [Cucumis sativus];gi|778674080|ref|XP_011650127.1|//PREDICTED: cytochrome P450 CYP73A100-like [Cucumis sativus]
Csa4G045040	534	1.00	12.30	3.62058641045188	4.50706e-11	2.50026873639213e-10	Up	NA	NA	NA	NA	gi|778690692|ref|XP_011653150.1|//PREDICTED: dehydrin DHN1-like [Cucumis sativus]
BGI_novel_G000415	1209	0.31	3.81	3.61945087710645	1.192648e-08	5.49363132229058e-08	Up	NA	NA	NA	K09422//myb proto-oncogene protein, plant	gi|449438468|ref|XP_004137010.1|//PREDICTED: transcription repressor MYB6-like [Cucumis sativus]
Csa7G312940	1298	2.11	25.74	3.60869714951352	1.136942e-47	2.23101945282258e-46	Up	NA	GO:0005199//structural constituent of cell wall	GO:0009664//plant-type cell wall organization	K12199//vacuolar protein sorting-associated protein VTA1;K05747//Wiskott-Aldrich syndrome protein;K12896//splicing factor, arginine/serine-rich 7	gi|778726578|ref|XP_004139745.2|//PREDICTED: extensin-3 [Cucumis sativus]
Csa3G731130	924	0.96	11.66	3.60238957247934	2.78106e-18	2.27653969554247e-17	Up	NA	NA	NA	NA	gi|778683209|ref|XP_004137715.2|//PREDICTED: trihelix transcription factor GT-3b [Cucumis sativus]
Csa5G598700	1032	4.51	54.10	3.5844292554588	2.58544e-89	9.90712107086614e-88	Up	NA	NA	NA	K14570//RNA exonuclease 1 [EC:3.1.-.-]	gi|449434973|ref|XP_004135270.1|//PREDICTED: uncharacterized protein LOC101221356 isoform X1 [Cucumis sativus]
Csa6G363520	555	18.38	218.66	3.5724806571072	2.33524e-180	1.93437369531915e-178	Up	NA	NA	NA	NA	gi|449452915|ref|XP_004144204.1|//PREDICTED: uncharacterized protein LOC101208403 [Cucumis sativus]
Csa4G285760	1134	23.05	272.37	3.56272915171376	0	0	Up	NA	GO:0016209//antioxidant activity;GO:0005506//iron ion binding;GO:0003824//catalytic activity	GO:0008152//metabolic process;GO:0006950//response to stress	K00430//peroxidase [EC:1.11.1.7]	gi|700198942|gb|KGN54100.1|//hypothetical protein Csa_4G285760 [Cucumis sativus]
Csa1G569340	1095	0.46	5.38	3.54790040649961	1.537106e-10	8.20436122731012e-10	Up	NA	NA	NA	NA	gi|778662422|ref|XP_004135778.2|//PREDICTED: probable purine permease 11 [Cucumis sativus]
Csa3G716870	1186	3.23	37.47	3.53612990763519	7.90774e-70	2.29406955052161e-68	Up	NA	GO:0016620//oxidoreductase activity, acting on the aldehyde or oxo group of donors, NAD or NADP as acceptor;GO:0016616//oxidoreductase activity, acting on the CH-OH group of donors, NAD or NADP as acceptor;GO:0048037//cofactor binding;GO:0003824//catalytic activity;GO:0050662//coenzyme binding	GO:0008152//metabolic process	K09753//cinnamoyl-CoA reductase [EC:1.2.1.44]	gi|778682975|ref|XP_011651820.1|//PREDICTED: cinnamoyl-CoA reductase 2-like isoform X1 [Cucumis sativus]
Csa2G094400	1557	0.12	1.38	3.52356195605701	8.12494e-05	0.000248835874826935	Up	GO:0031224//intrinsic component of membrane	GO:0016628//oxidoreductase activity, acting on the CH-CH group of donors, NAD or NADP as acceptor;GO:0022857//transmembrane transporter activity	GO:0071702//organic substance transport;GO:0008152//metabolic process	K08150//MFS transporter, SP family, solute carrier family 2 (myo-inositol transporter), member 13	gi|566006076|ref|NP_001274389.1|//sugar transport protein 10-like [Cucumis sativus]
Csa2G094390	1557	0.12	1.38	3.52356195605701	8.12494e-05	0.000248796731225421	Up	GO:0031224//intrinsic component of membrane	GO:0016628//oxidoreductase activity, acting on the CH-CH group of donors, NAD or NADP as acceptor;GO:0022857//transmembrane transporter activity	GO:0071702//organic substance transport;GO:0008152//metabolic process	K08150//MFS transporter, SP family, solute carrier family 2 (myo-inositol transporter), member 13	gi|778668081|ref|XP_011649035.1|//PREDICTED: sugar transport protein 10-like [Cucumis sativus]
Csa5G623920	435	2.52	28.94	3.52156928303181	4.37358e-19	3.73240281806225e-18	Up	NA	NA	NA	NA	gi|700197153|gb|KGN52330.1|//hypothetical protein Csa_5G623920 [Cucumis sativus]
Csa3G806240	762	0.34	3.89	3.51616350373585	1.138164e-05	3.88352329956179e-05	Up	NA	NA	NA	K03016//DNA-directed RNA polymerases I, II, and III subunit RPABC3;K06758;K03283//heat shock 70kDa protein 1/8;K16219//protein N-terminal methyltransferase [EC:2.1.1.244]	gi|449437906|ref|XP_004136731.1|//PREDICTED: uncharacterized protein LOC101202742 [Cucumis sativus]
Csa2G010200	1811	0.63	7.20	3.51457317282976	2.8706e-22	2.84661740193581e-21	Up	GO:0016021//integral component of membrane	NA	NA	K19626//inversin;K15502//serine/threonine-protein phosphatase 6 regulatory ankyrin repeat subunit A;K06694//26S proteasome non-ATPase regulatory subunit 10;K16279//E3 ubiquitin-protein ligase KEG [EC:2.7.11.1 2.3.2.27];K10406//kinesin family member C2/C3	gi|778666436|ref|XP_011648740.1|//PREDICTED: ankyrin repeat-containing protein At3g12360-like [Cucumis sativus]
Csa5G515060	468	0.87	9.93	3.51270641167965	7.51706e-08	3.22377373782772e-07	Up	NA	NA	NA	K06758;K03283//heat shock 70kDa protein 1/8	gi|449450165|ref|XP_004142834.1|//PREDICTED: uncharacterized protein LOC101213112 [Cucumis sativus]
Csa5G184810	1074	0.82	9.34	3.50972673509158	5.88552e-17	4.55174939690107e-16	Up	NA	NA	NA	K18789//xylogalacturonan beta-1,3-xylosyltransferase [EC:2.4.2.41];K01930//folylpolyglutamate synthase [EC:6.3.2.17]	gi|778708385|ref|XP_011656179.1|//PREDICTED: probable glycosyltransferase At5g03795 [Cucumis sativus]
Csa2G004710	192	3.49	39.68	3.50711308417722	9.57122e-10	4.83303160881971e-09	Up	NA	NA	NA	NA	gi|700205503|gb|KGN60622.1|//hypothetical protein Csa_2G004710 [Cucumis sativus]
Csa5G292250	2535	0.19	2.15	3.50026533614587	5.21084e-10	2.67989990594452e-09	Up	NA	NA	NA	K10706//senataxin [EC:3.6.4.-]	gi|778701983|ref|XP_011655120.1|//PREDICTED: putative ATP-dependent RNA helicase ECM32 [Cucumis sativus]
Csa7G378370	1026	0.49	5.52	3.49381461266296	5.21084e-10	2.67919206127839e-09	Up	NA	NA	NA	K18054//2'-deoxymugineic-acid 2'-dioxygenase / mugineic-acid 3-dioxygenase [EC:1.14.11.24 1.14.11.25]	gi|449458500|ref|XP_004146985.1|//PREDICTED: hyoscyamine 6-dioxygenase-like [Cucumis sativus]
Csa6G399220	327	1.32	14.79	3.48601221774061	1.383018e-07	5.7734995470727e-07	Up	NA	NA	NA	NA	gi|778722281|ref|XP_011658451.1|//PREDICTED: uncharacterized protein LOC105436010 [Cucumis sativus]
Csa1G050360	1707	53.18	595.11	3.48420067819116	0	0	Up	GO:0005777//peroxisome	GO:0046912//transferase activity, transferring acyl groups, acyl groups converted into alkyl on transfer;GO:0016747//transferase activity, transferring acyl groups other than amino-acyl groups	GO:0044262//cellular carbohydrate metabolic process;GO:0009060//aerobic respiration	K01638//malate synthase [EC:2.3.3.9]	gi|449469625|ref|XP_004152519.1|//PREDICTED: malate synthase, glyoxysomal [Cucumis sativus]
Csa5G622530	1329	8.87	98.82	3.47779704614645	1.37006e-205	1.28838589178744e-203	Up	NA	NA	NA	K14794//ribosomal RNA-processing protein 12	gi|700197059|gb|KGN52236.1|//hypothetical protein Csa_5G622530 [Cucumis sativus]
Csa3G076580	564	0.70	7.79	3.4761965011167	1.383018e-07	5.77473796396396e-07	Up	NA	NA	NA	K06927//diphthine-ammonia ligase [EC:6.3.1.14]	gi|700200989|gb|KGN56122.1|//Plastid-lipid associated protein [Cucumis sativus]
Csa5G576840	1140	0.22	2.41	3.45345771759266	2.1005e-05	6.94670965001699e-05	Up	NA	NA	NA	K12471//epsin	gi|449458811|ref|XP_004147140.1|//PREDICTED: uncharacterized protein LOC101202787 [Cucumis sativus]
Csa4G289620	2421	0.41	4.49	3.45301963012306	1.47155e-18	1.21894435319149e-17	Up	NA	NA	NA	K04733//interleukin-1 receptor-associated kinase 4 [EC:2.7.11.1];K00276//primary-amine oxidase [EC:1.4.3.21];K04730//interleukin-1 receptor-associated kinase 1 [EC:2.7.11.1]	gi|700198986|gb|KGN54144.1|//hypothetical protein Csa_4G289620 [Cucumis sativus]
Csa3G182060	1673	0.31	3.37	3.44240847079498	2.83234e-10	1.47971901341922e-09	Up	GO:0016021//integral component of membrane	NA	NA	K13667//protein glucosyltransferase [EC:2.4.1.-]	gi|700202237|gb|KGN57370.1|//hypothetical protein Csa_3G182060 [Cucumis sativus]
Csa2G010160	423	0.97	10.51	3.43763411177505	2.539e-07	1.03095899040467e-06	Up	NA	NA	NA	NA	gi|700205661|gb|KGN60780.1|//hypothetical protein Csa_2G010160 [Cucumis sativus]
Csa4G025190	1173	0.53	5.74	3.43698647211249	1.248846e-11	7.20510854653231e-11	Up	NA	GO:0004175//endopeptidase activity	GO:0019538//protein metabolic process	NA	gi|778690341|ref|XP_011653104.1|//PREDICTED: metacaspase-1-like isoform X1 [Cucumis sativus]
Csa3G134780	2133	0.38	4.04	3.41028396930821	4.34476e-15	3.06542581225082e-14	Up	GO:0016021//integral component of membrane	GO:0005215//transporter activity	GO:0006810//transport	K14638//solute carrier family 15 (peptide/histidine transporter), member 3/4	gi|700201697|gb|KGN56830.1|//hypothetical protein Csa_3G134780 [Cucumis sativus];gi|449433237|ref|XP_004134404.1|//PREDICTED: protein NRT1/ PTR FAMILY 5.2-like [Cucumis sativus]
Csa5G139760	879	9.54	100.16	3.39217339092711	9.13356e-132	5.38769330181818e-130	Up	GO:0044421//extracellular region part	GO:0004553//hydrolase activity, hydrolyzing O-glycosyl compounds;GO:0043167//ion binding	GO:0006026//aminoglycan catabolic process	K01183//chitinase [EC:3.2.1.14]	gi|821595437|ref|NP_001295833.1|//acidic endochitinase precursor [Cucumis sativus]
Csa3G116790	777	2.77	28.77	3.3766073396901	2.47776e-32	3.37287245874126e-31	Up	NA	GO:0009055//electron carrier activity	NA	NA	gi|449431954|ref|XP_004133765.1|//PREDICTED: uclacyanin-2 [Cucumis sativus]
Csa1G033260	615	1.49	15.42	3.37141852945287	7.39348e-15	5.14188930618078e-14	Up	NA	NA	NA	K02183//calmodulin	gi|449439625|ref|XP_004137586.1|//PREDICTED: probable calcium-binding protein CML47 [Cucumis sativus]
Csa5G072680	750	3.43	35.43	3.3686909839455	4.67754e-40	7.77566128437233e-39	Up	NA	GO:0003824//catalytic activity	GO:0008152//metabolic process	K00059//3-oxoacyl-[acyl-carrier protein] reductase [EC:1.1.1.100]	gi|700194517|gb|KGN49694.1|//hypothetical protein Csa_5G072680 [Cucumis sativus]
Csa1G568490	1157	0.22	2.27	3.36711686865362	3.86468e-05	0.000124100727284725	Up	NA	NA	NA	NA	gi|700210924|gb|KGN66020.1|//hypothetical protein Csa_1G568490 [Cucumis sativus];gi|778662275|ref|XP_011659640.1|//PREDICTED: uncharacterized protein LOC105436212 isoform X2 [Cucumis sativus]
Csa1G059760	2460	0.10	1.03	3.36457243229586	3.86468e-05	0.000124080258749794	Up	NA	NA	NA	K15502//serine/threonine-protein phosphatase 6 regulatory ankyrin repeat subunit A	gi|700209401|gb|KGN64497.1|//hypothetical protein Csa_1G059760 [Cucumis sativus];gi|778664851|ref|XP_011648416.1|//PREDICTED: ankyrin repeat-containing protein At5g02620-like [Cucumis sativus]
Csa4G279910	2394	0.46	4.71	3.35602129355577	3.82514e-20	3.44563513373438e-19	Up	NA	NA	NA	K06892//feruloyl-CoA ortho-hydroxylase [EC:1.14.11.-]	gi|449448838|ref|XP_004142172.1|//PREDICTED: uncharacterized protein LOC101218379 [Cucumis sativus]
Csa3G730800	1431	5.62	57.54	3.35592318551836	5.00566e-126	2.80000510229885e-124	Up	NA	GO:0003677//DNA binding;GO:0001071//nucleic acid binding transcription factor activity	GO:0010467//gene expression	K10268//F-box and leucine-rich repeat protein 2/20;K13424//WRKY transcription factor 33	gi|700203583|gb|KGN58716.1|//hypothetical protein Csa_3G730800 [Cucumis sativus]
Csa3G852590	1599	0.46	4.69	3.34988215645836	1.006158e-12	6.23158499140948e-12	Up	NA	NA	NA	K00517	gi|449460181|ref|XP_004147824.1|//PREDICTED: cytochrome P450 CYP82D47 [Cucumis sativus]
Csa5G021300	1890	1.94	19.70	3.34406707215661	2.67818e-58	6.37328262591687e-57	Up	NA	NA	GO:0023052//signaling;GO:0006351//transcription, DNA-templated	K12116//flavin-binding kelch repeat F-box protein 1	gi|449449016|ref|XP_004142261.1|//PREDICTED: adagio protein 3 [Cucumis sativus]
Csa4G308490	1416	3.93	39.86	3.34234049258045	1.583082e-86	5.76005125457944e-85	Up	NA	NA	NA	K13065//shikimate O-hydroxycinnamoyltransferase [EC:2.3.1.133]	gi|449460313|ref|XP_004147890.1|//PREDICTED: BAHD acyltransferase DCR-like [Cucumis sativus]
Csa3G690300	381	2.20	21.95	3.31864551089806	3.3275e-12	1.98629607482367e-11	Up	NA	NA	NA	NA	gi|700203449|gb|KGN58582.1|//hypothetical protein Csa_3G690300 [Cucumis sativus]
BGI_novel_G000153	2013	0.15	1.48	3.30256277002043	6.14978e-06	2.15813263890391e-05	Up	NA	NA	NA	K15032//mTERF domain-containing protein, mitochondrial	gi|778678867|ref|XP_011651053.1|//PREDICTED: uncharacterized protein LOC101209993 [Cucumis sativus]
Csa7G420820	921	1.51	14.87	3.29978419272734	2.7818e-21	2.63891417153996e-20	Up	NA	NA	NA	NA	gi|449436701|ref|XP_004136131.1|//PREDICTED: UPF0496 protein 4-like [Cucumis sativus]
Csa1G066560	1862	0.78	7.68	3.29956028185891	6.99328e-24	7.40648468335147e-23	Up	NA	NA	NA	K15086//(3S)-linalool synthase [EC:4.2.3.25]	gi|700209491|gb|KGN64587.1|//hypothetical protein Csa_1G066560 [Cucumis sativus];gi|449473351|ref|XP_004153857.1|//PREDICTED: (3S,6E)-nerolidol synthase 1-like [Cucumis sativus]
Csa6G012250	2067	0.12	1.18	3.29768054864069	7.08714e-05	0.000219224959860162	Up	NA	GO:0016874//ligase activity	NA	K08332//vacuolar protein 8	gi|778709556|ref|XP_004138560.2|//PREDICTED: U-box domain-containing protein 13-like [Cucumis sativus]
Csa2G000790	579	0.68	6.64	3.28757659009659	1.548654e-06	5.80067322763133e-06	Up	NA	NA	NA	NA	gi|449446540|ref|XP_004141029.1|//PREDICTED: uncharacterized protein LOC101219805 [Cucumis sativus]
Csa4G280630	588	11.42	111.23	3.28391139604328	1.134248e-91	4.44250936981891e-90	Up	NA	NA	NA	K02889//large subunit ribosomal protein L21e;K01870//isoleucyl-tRNA synthetase [EC:6.1.1.5];K19027//zinc finger FYVE domain-containing protein 26	gi|778693009|ref|XP_004142157.2|//PREDICTED: dirigent protein 7-like [Cucumis sativus]
BGI_novel_G000392	4051	2.55	24.82	3.2829339632715	1.106242e-155	7.91695101911764e-154	Up	NA	NA	NA	K05681//ATP-binding cassette, subfamily G (WHITE), member 2	gi|449464392|ref|XP_004149913.1|//PREDICTED: ABC transporter G family member 24-like isoform X1 [Cucumis sativus]
Csa6G134390	1676	5.25	50.69	3.27131183603599	7.4698e-131	4.35350679041916e-129	Up	NA	GO:0004190//aspartic-type endopeptidase activity	GO:0006508//proteolysis	K00924;K02882//large subunit ribosomal protein L18Ae;K01381//saccharopepsin [EC:3.4.23.25]	gi|778713001|ref|XP_004140022.2|//PREDICTED: protein ASPARTIC PROTEASE IN GUARD CELL 2 [Cucumis sativus]
Csa2G409500	372	2.26	21.82	3.27125642390842	1.094154e-11	6.33515816894706e-11	Up	NA	GO:0015036//disulfide oxidoreductase activity	GO:0019725//cellular homeostasis	K03676//glutaredoxin 3	gi|564112188|ref|NP_001274138.1|//glutaredoxin-C9-like [Cucumis sativus]
Csa3G076570	345	0.83	7.97	3.26339648264355	0.0001295	0.00038604088820827	Up	NA	NA	NA	NA	gi|778688380|ref|XP_011652736.1|//PREDICTED: uncharacterized protein LOC105435072 [Cucumis sativus]
Csa3G589590	1353	10.90	104.03	3.25459959027072	1.418012e-207	1.3597547582266e-205	Up	GO:0031224//intrinsic component of membrane	NA	NA	K14209//solute carrier family 36 (proton-coupled amino acid transporter)	gi|449455880|ref|XP_004145678.1|//PREDICTED: lysine histidine transporter 2 isoform X1 [Cucumis sativus]
BGI_novel_G000016	4179	0.92	8.72	3.24462236871991	2.6347e-57	6.14216409580838e-56	Up	GO:0016021//integral component of membrane	GO:0000287//magnesium ion binding;GO:0005524//ATP binding;GO:0004012//phospholipid-translocating ATPase activity	GO:0045332//phospholipid translocation	K01530//phospholipid-translocating ATPase [EC:3.6.3.1]	gi|778657179|ref|XP_004137458.2|//PREDICTED: putative phospholipid-transporting ATPase 9 [Cucumis sativus]
Csa6G121970	810	0.47	4.43	3.23657403687738	2.81474e-06	1.02280621317902e-05	Up	NA	NA	NA	K09422//myb proto-oncogene protein, plant	gi|778712704|ref|XP_004140052.2|//PREDICTED: transcription repressor MYB6-like [Cucumis sativus]
Csa1G294080	827	0.46	4.33	3.23466125866971	2.81474e-06	1.02299717774459e-05	Up	NA	NA	NA	NA	gi|449464326|ref|XP_004149880.1|//PREDICTED: transcription factor IBH1 [Cucumis sativus]
Csa6G495100	1392	0.53	4.97	3.22918158699909	1.97959e-11	1.12575807595676e-10	Up	GO:0043231//intracellular membrane-bounded organelle	GO:0000989//transcription factor activity, transcription factor binding;GO:0046914//transition metal ion binding;GO:0004468//lysine N-acetyltransferase activity, acting on acetyl phosphate as donor	GO:0006351//transcription, DNA-templated	K00517	gi|700193401|gb|KGN48605.1|//hypothetical protein Csa_6G495100 [Cucumis sativus]
Csa5G139010	2091	4.73	44.03	3.2185747555975	1.570074e-137	9.73345875286624e-136	Up	NA	NA	NA	K12130//pseudo-response regulator 5	gi|449456441|ref|XP_004145958.1|//PREDICTED: two-component response regulator-like APRR3 [Cucumis sativus]
BGI_novel_G000214	542	3.43	31.84	3.21455985437084	1.514468e-24	1.63781300488889e-23	Up	NA	NA	NA	NA	gi|700197983|gb|KGN53141.1|//hypothetical protein Csa_4G022280 [Cucumis sativus]
Csa1G045660	1524	6.39	58.88	3.20388983511002	8.39454e-132	4.96681202553191e-130	Up	NA	NA	NA	K08900//mitochondrial chaperone BCS1	gi|449469671|ref|XP_004152542.1|//PREDICTED: probable mitochondrial chaperone BCS1-B [Cucumis sativus]
Csa3G734040	1986	0.43	3.93	3.19212074755651	8.62834e-13	5.3575523585327e-12	Up	NA	NA	NA	K04730//interleukin-1 receptor-associated kinase 1 [EC:2.7.11.1]	gi|700203717|gb|KGN58850.1|//hypothetical protein Csa_3G734040 [Cucumis sativus]
Csa5G137410	495	0.54	4.93	3.19055633421444	0.000235706	0.000676135130562924	Up	NA	NA	NA	NA	gi|700194631|gb|KGN49808.1|//hypothetical protein Csa_5G137410 [Cucumis sativus]
Csa7G452050	2631	1.66	15.11	3.1862485138179	3.85324e-60	9.49457846075949e-59	Up	NA	GO:0016740//transferase activity	NA	K04733//interleukin-1 receptor-associated kinase 4 [EC:2.7.11.1];K16224//senescence-induced receptor-like serine/threonine-protein kinase	gi|778729916|ref|XP_011659664.1|//PREDICTED: probable LRR receptor-like serine/threonine-protein kinase At1g05700 [Cucumis sativus]
Csa7G071700	1071	6.79	61.49	3.17886832723576	1.280138e-94	5.21321470878661e-93	Up	NA	GO:0016616//oxidoreductase activity, acting on the CH-OH group of donors, NAD or NADP as acceptor;GO:0046914//transition metal ion binding	GO:0009699//phenylpropanoid biosynthetic process	K00083//cinnamyl-alcohol dehydrogenase [EC:1.1.1.195]	gi|449438637|ref|XP_004137094.1|//PREDICTED: cinnamyl alcohol dehydrogenase 1 [Cucumis sativus]
Csa6G513450	779	3.35	29.69	3.14774409264152	4.36664e-32	5.89057617740818e-31	Up	GO:0009534//chloroplast thylakoid	GO:0044183//protein binding involved in protein folding	GO:0061077//chaperone-mediated protein folding	NA	gi|449433988|ref|XP_004134778.1|//PREDICTED: uncharacterized protein LOC101222925 [Cucumis sativus]
Csa1G008570	1064	22.46	197.84	3.13890431198934	5.01482e-234	5.64268705895953e-232	Up	GO:0016020//membrane	NA	NA	NA	gi|449440758|ref|XP_004138151.1|//PREDICTED: hypersensitive-induced response protein 1 [Cucumis sativus]
Csa7G446780	3686	0.66	5.81	3.13800023404608	2.97478e-30	3.80717077449047e-29	Up	NA	NA	NA	K04733//interleukin-1 receptor-associated kinase 4 [EC:2.7.11.1];K04730//interleukin-1 receptor-associated kinase 1 [EC:2.7.11.1];K01183//chitinase [EC:3.2.1.14]	gi|778730495|ref|XP_011659798.1|//PREDICTED: G-type lectin S-receptor-like serine/threonine-protein kinase CES101 [Cucumis sativus];gi|700190128|gb|KGN45361.1|//hypothetical protein Csa_7G446780 [Cucumis sativus]
Csa6G032470	1071	1.64	14.41	3.13530261555666	5.10264e-23	5.21133212172088e-22	Up	NA	NA	NA	K19476//vacuolar protein sorting-associated protein IST1	gi|778710098|ref|XP_011656519.1|//PREDICTED: uncharacterized protein LOC101211044 [Cucumis sativus]
Csa3G705670	540	3.45	30.24	3.13178987255554	9.14542e-23	9.2480387387013e-22	Up	NA	NA	NA	K17609//nucleoredoxin [EC:1.8.1.8];K16219//protein N-terminal methyltransferase [EC:2.1.1.244]	gi|449467685|ref|XP_004151553.1|//PREDICTED: uncharacterized protein LOC101210060 [Cucumis sativus]
Csa6G127480	1869	3.34	29.27	3.1315027379347	6.08884e-80	2.01917137035775e-78	Up	NA	NA	NA	K08819//cyclin-dependent kinase 12/13 [EC:2.7.11.22 2.7.11.23]	gi|778712843|ref|XP_011656950.1|//PREDICTED: probable serine/threonine-protein kinase At1g54610 [Cucumis sativus]
Csa3G021150	411	71.88	629.90	3.13146049726276	0	0	Up	NA	NA	NA	K02883//large subunit ribosomal protein L18e;K05747//Wiskott-Aldrich syndrome protein;K11855//ubiquitin carboxyl-terminal hydrolase 36/42 [EC:3.4.19.12]	gi|449458930|ref|XP_004147199.1|//PREDICTED: 14 kDa proline-rich protein DC2.15-like [Cucumis sativus]
Csa1G250130	1566	11.17	97.51	3.12592099417554	3.8907e-218	3.88391621538461e-216	Up	NA	GO:0016616//oxidoreductase activity, acting on the CH-OH group of donors, NAD or NADP as acceptor;GO:0016491//oxidoreductase activity	GO:0008152//metabolic process	K13606//chlorophyll(ide) b reductase [EC:1.1.1.294]	gi|449464672|ref|XP_004150053.1|//PREDICTED: probable chlorophyll(ide) b reductase NYC1, chloroplastic [Cucumis sativus]
Csa6G486790	1017	0.37	3.22	3.12146351248567	9.21608e-06	3.17860051878101e-05	Up	NA	NA	GO:0010033//response to organic substance;GO:0009987//cellular process	K09286//EREBP-like factor	gi|449448584|ref|XP_004142046.1|//PREDICTED: ethylene-responsive transcription factor ABR1 [Cucumis sativus]
Csa4G289630	2184	0.50	4.34	3.11769504266975	5.37704e-15	3.77323217880317e-14	Up	NA	NA	NA	K04733//interleukin-1 receptor-associated kinase 4 [EC:2.7.11.1];K00276//primary-amine oxidase [EC:1.4.3.21]	gi|700198987|gb|KGN54145.1|//hypothetical protein Csa_4G289630 [Cucumis sativus]
Csa1G065930	2413	6.45	55.91	3.11573527931865	2.0649e-195	1.83540380821918e-193	Up	NA	NA	NA	K04733//interleukin-1 receptor-associated kinase 4 [EC:2.7.11.1];K04730//interleukin-1 receptor-associated kinase 1 [EC:2.7.11.1]	gi|700209477|gb|KGN64573.1|//hypothetical protein Csa_1G065930 [Cucumis sativus];gi|778664887|ref|XP_011648430.1|//PREDICTED: LOW QUALITY PROTEIN: cysteine-rich receptor-like protein kinase 29 [Cucumis sativus]
Csa2G408940	222	3.59	31.03	3.11160794770567	1.574728e-08	7.18388920740567e-08	Up	NA	NA	NA	NA	gi|659111874|ref|XP_008455953.1|//PREDICTED: uncharacterized protein LOC103496015 [Cucumis melo]
Csa3G017110	706	3.85	33.02	3.10040976933099	1.95165e-32	2.66415279803647e-31	Up	NA	NA	NA	K02605//origin recognition complex subunit 3	gi|449459012|ref|XP_004147240.1|//PREDICTED: uncharacterized protein LOC101207186 [Cucumis sativus]
Csa6G486970	2745	1.06	9.05	3.09385352740737	1.033812e-35	1.53502550663616e-34	Up	NA	GO:0004674//protein serine/threonine kinase activity;GO:0005524//ATP binding	GO:0006468//protein phosphorylation	K04730//interleukin-1 receptor-associated kinase 1 [EC:2.7.11.1]	gi|778718002|ref|XP_011657789.1|//PREDICTED: probable LRR receptor-like serine/threonine-protein kinase At1g51810 isoform X1 [Cucumis sativus]
Csa6G154530	2684	1.42	12.09	3.08985140974444	1.741782e-48	3.47749009353846e-47	Up	NA	NA	NA	K10643//CCR4-NOT transcription complex subunit 4 [EC:2.3.2.27];K12472//epidermal growth factor receptor substrate 15	gi|778713639|ref|XP_011657076.1|//PREDICTED: uncharacterized protein LOC105435802 [Cucumis sativus]
Csa1G589710	1452	0.94	7.99	3.08746284125034	1.053538e-17	8.3843706901063e-17	Up	NA	NA	NA	K14861//nucleolar pre-ribosomal-associated protein 1;K07936//GTP-binding nuclear protein Ran	gi|449452530|ref|XP_004144012.1|//PREDICTED: putative nuclease HARBI1 [Cucumis sativus]
Csa1G574950	1116	3.36	28.25	3.07171772941115	9.08784e-45	1.67681415582938e-43	Up	NA	NA	NA	K00924	gi|700211083|gb|KGN66179.1|//hypothetical protein Csa_1G574950 [Cucumis sativus]
Csa7G390060	918	8.56	71.96	3.07151248485034	7.09384e-91	2.75077070597609e-89	Up	NA	NA	NA	NA	gi|778727753|ref|XP_004148891.2|//PREDICTED: phenazine biosynthesis-like domain-containing protein 2 [Cucumis sativus]
Csa3G782630	1221	0.51	4.28	3.06904164442965	1.574728e-08	7.18557319456165e-08	Up	NA	NA	NA	K10260//F-box and WD-40 domain protein 7;K01876//aspartyl-tRNA synthetase [EC:6.1.1.12];K08332//vacuolar protein 8	gi|449437474|ref|XP_004136517.1|//PREDICTED: E3 ubiquitin-protein ligase PUB23-like [Cucumis sativus]
Csa6G490950	1053	1.07	8.94	3.06266403478217	3.08064e-14	2.07214022944022e-13	Up	NA	NA	NA	K04421//mitogen-activated protein kinase kinase kinase 3 [EC:2.7.11.25];K11228//mitogen-activated protein kinase kinase kinase [EC:2.7.11.1];K04373//p90 ribosomal S6 kinase [EC:2.7.11.1]	gi|778718409|ref|XP_011657865.1|//PREDICTED: mitogen-activated protein kinase kinase kinase 3-like [Cucumis sativus]
Csa6G363560	462	2.64	21.94	3.05495369104474	5.49798e-14	3.64770547648262e-13	Up	NA	NA	NA	K13424//WRKY transcription factor 33	gi|449453049|ref|XP_004144271.1|//PREDICTED: probable WRKY transcription factor 50 isoform X1 [Cucumis sativus]
Csa3G881770	1350	2.02	16.69	3.0465567566108	1.595254e-32	2.18530713328642e-31	Up	NA	NA	NA	K04730//interleukin-1 receptor-associated kinase 1 [EC:2.7.11.1]	gi|700205031|gb|KGN60164.1|//hypothetical protein Csa_3G881770 [Cucumis sativus]
Csa5G471600	2403	3.09	25.51	3.0453841556981	8.75884e-88	3.24761103695238e-86	Up	NA	NA	NA	NA	gi|449452068|ref|XP_004143782.1|//PREDICTED: phosphate transporter PHO1 homolog 3-like [Cucumis sativus]
Csa4G642460	789	7.47	61.51	3.04164082781437	1.04566e-65	2.78071278142076e-64	Up	NA	NA	NA	NA	gi|449447055|ref|XP_004141285.1|//PREDICTED: zinc finger protein ZAT10 [Cucumis sativus]
Csa6G183190	1764	5.77	47.51	3.04158798276536	5.88724e-118	3.03981469071618e-116	Up	NA	GO:0016884//carbon-nitrogen ligase activity, with glutamine as amido-N-donor	GO:0006528//asparagine metabolic process	K01953//asparagine synthase (glutamine-hydrolysing) [EC:6.3.5.4]	gi|449450826|ref|XP_004143163.1|//PREDICTED: asparagine synthetase [glutamine-hydrolyzing] [Cucumis sativus]
Csa3G806250	2004	1.22	10.03	3.03936855304929	1.387528e-29	1.74143262720825e-28	Up	NA	NA	NA	K04730//interleukin-1 receptor-associated kinase 1 [EC:2.7.11.1]	gi|700204160|gb|KGN59293.1|//hypothetical protein Csa_3G806250 [Cucumis sativus]
Csa6G517020	2830	1.24	10.16	3.03448837638529	1.020982e-36	1.55512015743349e-35	Up	NA	GO:0050136//NADH dehydrogenase (quinone) activity;GO:0008137//NADH dehydrogenase (ubiquinone) activity;GO:0050662//coenzyme binding	GO:0008152//metabolic process;GO:0055114//oxidation-reduction process	K17871//NADH:ubiquinone reductase (non-electrogenic) [EC:1.6.5.9]	gi|778720691|ref|XP_011658194.1|//PREDICTED: internal alternative NAD(P)H-ubiquinone oxidoreductase A2, mitochondrial [Cucumis sativus];gi|700193990|gb|KGN49194.1|//hypothetical protein Csa_6G517020 [Cucumis sativus]
Csa3G828930	1203	9.64	78.05	3.01729358063531	5.75588e-110	2.76651753283951e-108	Up	GO:0016021//integral component of membrane	GO:0005524//ATP binding;GO:0000166//nucleotide binding	NA	K08900//mitochondrial chaperone BCS1	gi|700204471|gb|KGN59604.1|//hypothetical protein Csa_3G828930 [Cucumis sativus];gi|778688927|ref|XP_011652867.1|//PREDICTED: probable mitochondrial chaperone BCS1-B [Cucumis sativus]
Csa3G850630	2774	1.14	9.20	3.01260003677963	2.04786e-34	2.94631505986696e-33	Up	NA	NA	NA	K04733//interleukin-1 receptor-associated kinase 4 [EC:2.7.11.1];K04382//serine/threonine-protein phosphatase 2A catalytic subunit [EC:3.1.3.16];K04730//interleukin-1 receptor-associated kinase 1 [EC:2.7.11.1];K05349//beta-glucosidase [EC:3.2.1.21]	gi|778688983|ref|XP_011652878.1|//PREDICTED: uncharacterized protein LOC101216184 [Cucumis sativus];gi|700204726|gb|KGN59859.1|//hypothetical protein Csa_3G850630 [Cucumis sativus]
Csa2G030070	1179	0.50	4.02	3.0071955014042	6.41154e-08	2.76979666311585e-07	Up	NA	NA	NA	K17398//DNA (cytosine-5)-methyltransferase 3A [EC:2.1.1.37]	gi|700205827|gb|KGN60946.1|//hypothetical protein Csa_2G030070 [Cucumis sativus]
Csa4G285730	969	147.06	1181.11	3.0056665379703	0	0	Up	NA	GO:0016209//antioxidant activity;GO:0005506//iron ion binding;GO:0003824//catalytic activity	GO:0008152//metabolic process;GO:0006950//response to stress	K00430//peroxidase [EC:1.11.1.7]	gi|525506991|ref|NP_001267541.1|//peroxidase 2-like precursor [Cucumis sativus]
BGI_novel_G000036	2457	0.81	6.46	2.9955403518093	1.066428e-23	1.12090105010799e-22	Up	NA	NA	NA	K13024//inositol-hexakisphosphate/diphosphoinositol-pentakisphosphate 1-kinase [EC:2.7.4.24];K01537//Ca2+-transporting ATPase [EC:3.6.3.8];K13116//ATP-dependent RNA helicase DDX41 [EC:3.6.4.13];K01507//inorganic pyrophosphatase [EC:3.6.1.1];K00574//cyclopropane-fatty-acyl-phospholipid synthase [EC:2.1.1.79]	gi|659111573|ref|XP_008455798.1|//PREDICTED: uncharacterized protein LOC103495894 [Cucumis melo]
Csa4G288620	2211	4.30	34.02	2.98397457607393	8.54386e-105	3.87680136969697e-103	Up	NA	NA	NA	K00276//primary-amine oxidase [EC:1.4.3.21]	gi|700198984|gb|KGN54142.1|//hypothetical protein Csa_4G288620 [Cucumis sativus]
Csa6G058200	1240	10.76	84.43	2.97207763621511	2.9477e-139	1.86298468181818e-137	Up	NA	NA	NA	K05747//Wiskott-Aldrich syndrome protein	gi|855312365|ref|XP_012897803.1|//uncharacterized protein [Blastocystis hominis];gi|700190951|gb|KGN46155.1|//hypothetical protein Csa_6G058200 [Cucumis sativus]
Csa3G146510	510	6.82	53.17	2.96276882205867	1.159144e-34	1.68136342056632e-33	Up	NA	GO:0016407//acetyltransferase activity	NA	NA	gi|449432692|ref|XP_004134133.1|//PREDICTED: uncharacterized protein YIR042C-like [Cucumis sativus]
Csa1G085890	1749	4.49	34.71	2.9505640150875	2.41054e-83	8.39419886225402e-82	Up	NA	NA	NA	K08472//mlo protein	gi|449462111|ref|XP_004148785.1|//PREDICTED: MLO-like protein 6 [Cucumis sativus]
Csa6G080320	3063	3.71	28.46	2.93944456990568	1.68674e-120	8.99563858630137e-119	Up	NA	NA	NA	K19613//leucine-rich repeat protein SHOC2;K10406//kinesin family member C2/C3;K13420//LRR receptor-like serine/threonine-protein kinase FLS2 [EC:2.7.11.1]	gi|778711358|ref|XP_004153632.2|//PREDICTED: receptor-like protein 12 [Cucumis sativus]
Csa7G432470	549	87.47	668.24	2.93350614421209	0	0	Up	NA	GO:0046914//transition metal ion binding	NA	NA	gi|525507413|ref|NP_001267496.1|//cucumber peeling cupredoxin-like precursor [Cucumis sativus]
Csa2G371110	960	0.45	3.43	2.93021166984314	9.21608e-06	3.17803743631532e-05	Up	GO:0016020//membrane;GO:0043231//intracellular membrane-bounded organelle	NA	GO:0006810//transport;GO:0009987//cellular process	K15104//solute carrier family 25 (mitochondrial oxoglutarate transporter), member 11	gi|778671873|ref|XP_004148417.2|//PREDICTED: mitochondrial uncoupling protein 5-like [Cucumis sativus]
Csa3G038190	2556	8.50	64.67	2.92756186402281	6.08906e-225	6.33848352727272e-223	Up	GO:0044464//cell part	GO:0004620//phospholipase activity;GO:0046872//metal ion binding	GO:0006650//glycerophospholipid metabolic process	K01115//phospholipase D1/2 [EC:3.1.4.4]	gi|778675616|ref|XP_011650436.1|//PREDICTED: phospholipase D beta 1-like [Cucumis sativus]
Csa4G618500	1392	8.36	63.58	2.92699816905709	2.77804e-118	1.44206204373333e-116	Up	NA	GO:0016740//transferase activity	NA	K12938//anthocyanidin 5,3-O-glucosyltransferase [EC:2.4.1.-];K08237//hydroquinone glucosyltransferase [EC:2.4.1.218]	gi|778695491|ref|XP_004146061.2|//PREDICTED: anthocyanidin 3-O-glucosyltransferase 2-like [Cucumis sativus]
CsaUNG017640	609	1.51	11.47	2.92524493669075	5.14318e-10	2.64790113409151e-09	Up	NA	NA	NA	NA	gi|449445353|ref|XP_004140437.1|//PREDICTED: uncharacterized protein At1g66480 [Cucumis sativus]
Csa4G285770	990	44.82	338.70	2.91779343287113	0	0	Up	NA	GO:0016209//antioxidant activity;GO:0005506//iron ion binding;GO:0003824//catalytic activity	GO:0008152//metabolic process;GO:0006950//response to stress	K00430//peroxidase [EC:1.11.1.7]	gi|449448788|ref|XP_004142147.1|//PREDICTED: peroxidase 2-like [Cucumis sativus]
Csa4G026890	1950	0.68	5.13	2.91535217435671	4.4454e-15	3.13415995653749e-14	Up	NA	NA	NA	K10352//myosin heavy chain;K20283//golgin subfamily A member 4;K09291//nucleoprotein TPR;K10406//kinesin family member C2/C3	gi|700198054|gb|KGN53212.1|//hypothetical protein Csa_4G026890 [Cucumis sativus]
Csa3G828430	1527	9.09	68.38	2.91122222323929	1.24576e-139	7.89901112703583e-138	Up	NA	NA	NA	K08900//mitochondrial chaperone BCS1	gi|778688927|ref|XP_011652867.1|//PREDICTED: probable mitochondrial chaperone BCS1-B [Cucumis sativus]
Csa7G020910	852	1.67	12.53	2.90746640684781	5.91672e-15	4.14298098992806e-14	Up	NA	NA	NA	K13126//polyadenylate-binding protein	gi|449454271|ref|XP_004144879.1|//PREDICTED: protein FEZ-like [Cucumis sativus]
Csa7G032240	477	1.42	10.57	2.896012541878	2.825e-07	1.13971917098446e-06	Up	NA	NA	NA	NA	gi|778723509|ref|XP_011658666.1|//PREDICTED: uncharacterized protein LOC105436067 [Cucumis sativus]
Csa1G569310	507	11.10	82.56	2.89488329418579	1.930402e-51	4.05801353477322e-50	Up	GO:0044424//intracellular part	NA	NA	NA	gi|449435639|ref|XP_004135602.1|//PREDICTED: translationally-controlled tumor protein homolog [Cucumis sativus]
Csa6G087910	815	2.04	15.08	2.88599537129717	6.4101e-17	4.95154788095238e-16	Up	NA	NA	NA	K06995//uncharacterized protein	gi|449445646|ref|XP_004140583.1|//PREDICTED: uncharacterized protein LOC101208389 [Cucumis sativus];gi|659120045|ref|XP_008459983.1|//PREDICTED: uncharacterized protein LOC103498932 [Cucumis melo]
Csa7G414420	420	4.59	33.80	2.88045718775574	8.8671e-18	7.08567194581281e-17	Up	NA	NA	NA	NA	gi|700189812|gb|KGN45045.1|//hypothetical protein Csa_7G414420 [Cucumis sativus]
Csa2G075440	4059	2.08	15.28	2.87698910989466	5.61456e-85	1.99439826569343e-83	Up	NA	NA	NA	K13459//disease resistance protein RPS2	gi|778667939|ref|XP_011649012.1|//PREDICTED: disease resistance protein At4g27190-like [Cucumis sativus]
Csa6G513530	1656	6.61	48.52	2.87585737361282	1.06744e-106	4.92388318483412e-105	Up	NA	NA	NA	K10268//F-box and leucine-rich repeat protein 2/20;K13424//WRKY transcription factor 33	gi|700193885|gb|KGN49089.1|//hypothetical protein Csa_6G513530 [Cucumis sativus];gi|449433982|ref|XP_004134775.1|//PREDICTED: probable WRKY transcription factor 31 [Cucumis sativus]
Csa4G664340	558	2.04	14.97	2.87543316408692	1.258756e-11	7.25798113033175e-11	Up	NA	NA	NA	K19040//E3 ubiquitin-protein ligase ATL10/75/76/77/78 [EC:2.3.2.27];K15706//E3 ubiquitin-protein ligase RNF167 [EC:2.3.2.27]	gi|449455635|ref|XP_004145558.1|//PREDICTED: RING-H2 finger protein ATL8 [Cucumis sativus]
Csa6G448100	1177	0.73	5.35	2.87357052240849	1.634658e-10	8.70595147140903e-10	Up	NA	GO:0046914//transition metal ion binding;GO:0008270//zinc ion binding	NA	K10144//RING finger and CHY zinc finger domain-containing protein 1 [EC:2.3.2.27]	gi|449451062|ref|XP_004143281.1|//PREDICTED: RING finger and CHY zinc finger domain-containing protein 1-like [Cucumis sativus]
Csa2G420980	1116	1.32	9.65	2.86999101279699	9.92198e-15	6.8635843169865e-14	Up	GO:0016021//integral component of membrane	NA	GO:0016192//vesicle-mediated transport	K08486//syntaxin 1B/2/3	gi|778673542|ref|XP_011650017.1|//PREDICTED: syntaxin-132-like [Cucumis sativus]
Csa3G736660	1227	32.01	233.23	2.86515879002227	0	0	Up	NA	GO:0003824//catalytic activity;GO:0016740//transferase activity	NA	K00799//glutathione S-transferase [EC:2.5.1.18]	gi|449440047|ref|XP_004137796.1|//PREDICTED: glutathione S-transferase L3-like [Cucumis sativus]
Csa2G178720	924	0.55	3.98	2.85526490701899	6.7905e-06	2.37612570555456e-05	Up	NA	NA	NA	K19041//E3 ubiquitin-protein ligase RNF38/44 [EC:2.3.2.27]	gi|449449014|ref|XP_004142260.1|//PREDICTED: RING-H2 finger protein ATL16-like [Cucumis sativus]
Csa5G140450	891	32.05	231.50	2.85261593152886	6.07028e-259	7.82543513112582e-257	Up	NA	GO:0046872//metal ion binding	GO:0030001//metal ion transport	K10572//inositol-pentakisphosphate 2-kinase [EC:2.7.1.158];K12823//ATP-dependent RNA helicase DDX5/DBP2 [EC:3.6.4.13];K19307//25S rRNA (uracil2634-N3)-methyltransferase [EC:2.1.1.313]	gi|449456327|ref|XP_004145901.1|//PREDICTED: FK506-binding protein 4 [Cucumis sativus]
Csa4G303690	660	11.41	82.03	2.84585283683496	1.340226e-67	3.71635887692308e-66	Up	NA	NA	NA	K00799//glutathione S-transferase [EC:2.5.1.18]	gi|778693606|ref|XP_011653662.1|//PREDICTED: glutathione S-transferase U8-like [Cucumis sativus]
Csa5G608230	264	1.72	12.33	2.84169232970074	0.0001680204	0.000492795706855507	Up	NA	NA	NA	NA	gi|700196858|gb|KGN52035.1|//hypothetical protein Csa_5G608230 [Cucumis sativus]
Csa7G432200	1722	2.12	15.12	2.83432196965787	1.714532e-35	2.53610029726444e-34	Up	NA	NA	NA	NA	gi|449436629|ref|XP_004136095.1|//PREDICTED: putative UPF0481 protein At3g02645 [Cucumis sativus]
Csa1G072450	959	9.20	65.37	2.82892293089269	8.61486e-79	2.794947746e-77	Up	NA	GO:0005488//binding;GO:0004519//endonuclease activity;GO:0004518//nuclease activity;GO:0003676//nucleic acid binding	GO:0006308//DNA catabolic process;GO:0090305//nucleic acid phosphodiester bond hydrolysis;GO:0006259//DNA metabolic process	NA	gi|700209538|gb|KGN64634.1|//hypothetical protein Csa_1G072450 [Cucumis sativus];gi|793421441|ref|NP_001292654.1|//endonuclease 1 precursor [Cucumis sativus]
Csa5G544050	1941	1.07	7.60	2.8283886219298	1.340798e-20	1.23813917779886e-19	Up	NA	GO:0005488//binding	NA	K11699//RNA-dependent RNA polymerase [EC:2.7.7.48]	gi|778708597|ref|XP_011656241.1|//PREDICTED: RNA-dependent RNA polymerase 1 [Cucumis sativus]
Csa6G423990	766	14.11	99.62	2.81971742307532	1.721316e-96	7.17497585781584e-95	Up	NA	GO:0003824//catalytic activity	NA	K07025//putative hydrolase of the HAD superfamily	gi|449444767|ref|XP_004140145.1|//PREDICTED: uncharacterized protein LOC101214793 [Cucumis sativus]
Csa3G850600	1002	5.53	38.98	2.81738270502318	3.20572e-50	6.58254699578059e-49	Up	NA	NA	NA	K04733//interleukin-1 receptor-associated kinase 4 [EC:2.7.11.1]	gi|449458257|ref|XP_004146864.1|//PREDICTED: probable LRR receptor-like serine/threonine-protein kinase At1g51880 [Cucumis sativus]
Csa6G091870	414	296.10	2082.47	2.81413931669118	0	0	Up	NA	NA	NA	NA	gi|525506955|ref|NP_001267523.1|//light-regulated protein-like [Cucumis sativus]
Csa5G564290	3471	0.49	3.43	2.8073549220576	4.7914e-17	3.72481599041534e-16	Up	NA	GO:0005488//binding	NA	K11699//RNA-dependent RNA polymerase [EC:2.7.7.48]	gi|700196297|gb|KGN51474.1|//hypothetical protein Csa_5G564290 [Cucumis sativus]
Csa4G194780	1275	0.39	2.73	2.8073549220576	1.199384e-05	4.0788275583508e-05	Up	NA	NA	NA	K10260//F-box and WD-40 domain protein 7;K01876//aspartyl-tRNA synthetase [EC:6.1.1.12];K08332//vacuolar protein 8	gi|778692549|ref|XP_011653475.1|//PREDICTED: E3 ubiquitin-protein ligase PUB22-like [Cucumis sativus]
Csa2G297180	706	18.15	125.68	2.79171363241108	1.477374e-102	6.55092534943052e-101	Up	NA	GO:0043565//sequence-specific DNA binding;GO:0003700//transcription factor activity, sequence-specific DNA binding	GO:0006355//regulation of transcription, DNA-templated	K18835//WRKY transcription factor 2;K13424//WRKY transcription factor 33	gi|700206975|gb|KGN62094.1|//hypothetical protein Csa_2G297180 [Cucumis sativus];gi|449461443|ref|XP_004148451.1|//PREDICTED: probable WRKY transcription factor 51 [Cucumis sativus]
Csa1G000630	531	4.00	27.61	2.78711898281334	6.98526e-19	5.894021289987e-18	Up	NA	NA	NA	NA	gi|449440500|ref|XP_004138022.1|//PREDICTED: uncharacterized protein LOC101207324 [Cucumis sativus]
Csa4G645850	696	14.69	101.36	2.78658212858453	1.378362e-85	4.94128815690608e-84	Up	NA	NA	NA	NA	gi|700200153|gb|KGN55311.1|//hypothetical protein Csa_4G645850 [Cucumis sativus]
Csa3G176350	696	1.30	8.96	2.78498710902915	8.7107e-09	4.06332341720585e-08	Up	NA	NA	NA	NA	gi|449460856|ref|XP_004148160.1|//PREDICTED: uncharacterized protein LOC101217454 [Cucumis sativus]
Csa3G402970	2580	13.49	92.16	2.77225036849404	9.24694e-267	1.27660236907801e-264	Up	NA	NA	NA	K01188//beta-glucosidase [EC:3.2.1.21]	gi|449468520|ref|XP_004151969.1|//PREDICTED: beta-glucosidase 25 isoform X1 [Cucumis sativus];gi|700202811|gb|KGN57944.1|//hypothetical protein Csa_3G402970 [Cucumis sativus];gi|778681121|ref|XP_011651456.1|//PREDICTED: putative beta-glucosidase 41 isoform X4 [Cucumis sativus]
Csa6G008070	1362	5.19	35.16	2.76012862678552	4.58448e-61	1.14412163692308e-59	Up	GO:0031224//intrinsic component of membrane	NA	NA	K19476//vacuolar protein sorting-associated protein IST1;K14209//solute carrier family 36 (proton-coupled amino acid transporter)	gi|778709307|ref|XP_011656383.1|//PREDICTED: lysine histidine transporter 1 [Cucumis sativus]
Csa6G518290	534	4.24	28.62	2.75488750216347	6.62962e-19	5.60365535909683e-18	Up	NA	NA	NA	K09286//EREBP-like factor;K13433//pathogenesis-related genes transcriptional activator PTI5;K14516//ethylene-responsive transcription factor 1	gi|778721013|ref|XP_004134941.2|//PREDICTED: pathogenesis-related genes transcriptional activator PTI5-like [Cucumis sativus]
Csa3G851930	713	0.54	3.64	2.75290713803523	0.000296444	0.000836558263844593	Up	NA	NA	GO:0050832//defense response to fungus;GO:0031640//killing of cells of other organism	NA	gi|700204760|gb|KGN59893.1|//hypothetical protein Csa_3G851930 [Cucumis sativus]
Csa2G357250	5440	0.11	0.74	2.75002174699165	0.00020794	0.000601450228826152	Up	NA	NA	NA	K05387//glutamate receptor, ionotropic, plant	gi|700207383|gb|KGN62502.1|//hypothetical protein Csa_2G357250 [Cucumis sativus]
Csa1G009610	2844	2.43	16.28	2.74407248066047	2.40518e-60	5.95664553180662e-59	Up	NA	NA	NA	K05643//ATP-binding cassette, subfamily A (ABC1), member 3	gi|449440768|ref|XP_004138156.1|//PREDICTED: ABC transporter A family member 7 [Cucumis sativus]
Csa4G648560	1260	0.59	3.94	2.73940877009454	2.01746e-07	8.29045310534093e-07	Up	NA	GO:0004672//protein kinase activity	NA	K04733//interleukin-1 receptor-associated kinase 4 [EC:2.7.11.1]	gi|449447361|ref|XP_004141437.1|//PREDICTED: putative receptor-like protein kinase At1g72540 [Cucumis sativus]
Csa4G618520	1470	24.03	160.28	2.73768586130093	5.75038e-292	8.95495176639999e-290	Up	NA	NA	NA	K08237//hydroquinone glucosyltransferase [EC:2.4.1.218]	gi|449456653|ref|XP_004146063.1|//PREDICTED: anthocyanidin 3-O-glucosyltransferase 2-like [Cucumis sativus]
Csa5G178700	1125	1.22	8.11	2.73282076665439	1.62694e-12	9.90306880550344e-12	Up	NA	NA	NA	K07195//exocyst complex component 7	gi|700195326|gb|KGN50503.1|//hypothetical protein Csa_5G178700 [Cucumis sativus]
Csa4G628860	3015	0.75	4.97	2.72828335106641	2.00312e-15	1.44097316777531e-14	Up	GO:0016020//membrane	GO:0005216//ion channel activity;GO:0004872//receptor activity	GO:0006810//transport	K05387//glutamate receptor, ionotropic, plant;K05208//glutamate receptor ionotropic, NMDA 1	gi|700199931|gb|KGN55089.1|//hypothetical protein Csa_4G628860 [Cucumis sativus];gi|778695791|ref|XP_004146035.2|//PREDICTED: glutamate receptor 2.8-like isoform X2 [Cucumis sativus]
Csa5G223070	849	29.25	193.70	2.72731542413249	2.37104e-196	2.11718645137615e-194	Up	NA	GO:0003677//DNA binding;GO:0001071//nucleic acid binding transcription factor activity	GO:0010467//gene expression	K18835//WRKY transcription factor 2;K16225//probable WRKY transcription factor 52	gi|700195571|gb|KGN50748.1|//hypothetical protein Csa_5G223070 [Cucumis sativus]
Csa1G015870	486	1.66	10.90	2.71507298831736	3.52034e-07	1.40337780954331e-06	Up	NA	NA	NA	NA	gi|700208699|gb|KGN63795.1|//hypothetical protein Csa_1G015870 [Cucumis sativus]
Csa7G045570	1014	0.87	5.71	2.71440343951411	2.65832e-08	1.19067779843534e-07	Up	NA	NA	NA	NA	gi|700188335|gb|KGN43568.1|//hypothetical protein Csa_7G045570 [Cucumis sativus]
Csa4G280600	990	8.53	55.92	2.71274671405715	1.09027e-67	3.03188511714286e-66	Up	NA	NA	NA	NA	gi|449448810|ref|XP_004142158.1|//PREDICTED: transmembrane protein 45A-like [Cucumis sativus]
BGI_novel_G000543	498	2.70	17.67	2.71027072750079	3.64166e-11	2.03235531995413e-10	Up	GO:0016020//membrane	NA	NA	K01623//fructose-bisphosphate aldolase, class I [EC:4.1.2.13]	gi|659085556|ref|XP_008443483.1|//PREDICTED: WAT1-related protein At4g15540-like isoform X2 [Cucumis melo]
Csa4G361860	1487	16.86	109.87	2.70412107083076	5.26322e-193	4.61503786126126e-191	Up	NA	GO:0004190//aspartic-type endopeptidase activity	GO:0006508//proteolysis	K00924;K11450//lysine-specific histone demethylase 1A [EC:1.-.-.-]	gi|449449755|ref|XP_004142630.1|//PREDICTED: aspartic proteinase Asp1-like [Cucumis sativus]
Csa6G504490	1404	14.37	93.46	2.70128897540746	9.3785e-161	6.88912758490566e-159	Up	NA	NA	NA	K08900//mitochondrial chaperone BCS1	gi|778719549|ref|XP_011658026.1|//PREDICTED: mitochondrial chaperone BCS1-like [Cucumis sativus]
Csa7G432220	285	10.94	70.81	2.69434037827459	3.69434e-21	3.4825192464891e-20	Up	NA	NA	NA	NA	gi|700190008|gb|KGN45241.1|//hypothetical protein Csa_7G432220 [Cucumis sativus]
BGI_novel_G000107	1743	5.37	34.54	2.68527408954351	6.69914e-75	2.06664753153724e-73	Up	NA	NA	NA	K01673//carbonic anhydrase [EC:4.2.1.1]	gi|449469779|ref|XP_004152596.1|//PREDICTED: beta carbonic anhydrase 5, chloroplastic-like isoform X2 [Cucumis sativus]
Csa1G042540	1143	0.99	6.29	2.66755958679968	8.16712e-10	4.14013432083333e-09	Up	NA	NA	NA	K04730//interleukin-1 receptor-associated kinase 1 [EC:2.7.11.1]	gi|778664770|ref|XP_011660350.1|//PREDICTED: uncharacterized protein At1g18380-like [Cucumis sativus]
Csa2G028490	3152	15.39	97.43	2.66237283414423	0	0	Up	NA	GO:0016702//oxidoreductase activity, acting on single donors with incorporation of molecular oxygen, incorporation of two atoms of oxygen;GO:0046914//transition metal ion binding	GO:0006633//fatty acid biosynthetic process	K15718//linoleate 9S-lipoxygenase [EC:1.13.11.58]	gi|700205818|gb|KGN60937.1|//hypothetical protein Csa_2G028490 [Cucumis sativus];gi|449466536|ref|XP_004150982.1|//PREDICTED: linoleate 9S-lipoxygenase 6-like [Cucumis sativus]
Csa3G769610	4515	7.99	50.56	2.66172905524913	1.828386e-283	2.69631529363636e-281	Up	NA	NA	NA	K05665//ATP-binding cassette, subfamily C (CFTR/MRP), member 1	gi|449465513|ref|XP_004150472.1|//PREDICTED: ABC transporter C family member 3-like [Cucumis sativus]
BGI_novel_G000103	2016	8.16	51.44	2.65624958535645	2.96466e-127	1.68250937492711e-125	Up	GO:0009506//plasmodesma;GO:0016021//integral component of membrane	NA	GO:0055085//transmembrane transport	K14794//ribosomal RNA-processing protein 12	gi|778670267|ref|XP_004150375.2|//PREDICTED: uncharacterized protein LOC101208506 [Cucumis sativus]
Csa6G424530	1269	5.98	37.58	2.65174767722195	4.6737e-58	1.10544646658566e-56	Up	NA	NA	NA	K08150//MFS transporter, SP family, solute carrier family 2 (myo-inositol transporter), member 13	gi|700192809|gb|KGN48013.1|//Sugar transporter [Cucumis sativus]
Csa1G532310	1476	0.92	5.76	2.6463630453853	1.471412e-11	8.44911681179941e-11	Up	NA	NA	NA	K04421//mitogen-activated protein kinase kinase kinase 3 [EC:2.7.11.25];K11228//mitogen-activated protein kinase kinase kinase [EC:2.7.11.1]	gi|778661745|ref|XP_004145313.2|//PREDICTED: mitogen-activated protein kinase kinase kinase NPK1 [Cucumis sativus]
BGI_novel_G000391	3695	5.06	31.64	2.64454030977848	1.810926e-144	1.21977458532872e-142	Up	NA	NA	NA	K05681//ATP-binding cassette, subfamily G (WHITE), member 2	gi|778716051|ref|XP_011657500.1|//PREDICTED: ABC transporter G family member 24-like isoform X2 [Cucumis sativus]
Csa1G597020	1266	1.18	7.36	2.64091890669517	1.98596e-12	1.20357090161893e-11	Up	NA	GO:0032559//adenyl ribonucleotide binding;GO:0004672//protein kinase activity	GO:0006464//cellular protein modification process	K04733//interleukin-1 receptor-associated kinase 4 [EC:2.7.11.1]	gi|449452574|ref|XP_004144034.1|//PREDICTED: serine/threonine-protein kinase At5g01020 [Cucumis sativus]
Csa4G082380	1323	5.97	37.19	2.63911191134718	5.28532e-60	1.29740276317781e-58	Up	NA	NA	NA	K04733//interleukin-1 receptor-associated kinase 4 [EC:2.7.11.1];K14962//COMPASS component SWD2;K03327//multidrug resistance protein, MATE family	gi|778691479|ref|XP_011653285.1|//PREDICTED: epidermis-specific secreted glycoprotein EP1-like isoform X1 [Cucumis sativus]
Csa4G288610	3990	10.17	62.99	2.63080313202784	2e-307	3.32752136752137e-305	Up	NA	GO:0016702//oxidoreductase activity, acting on single donors with incorporation of molecular oxygen, incorporation of two atoms of oxygen;GO:0046872//metal ion binding	GO:0006633//fatty acid biosynthetic process;GO:0055114//oxidation-reduction process;GO:0031408//oxylipin biosynthetic process	K00454//lipoxygenase [EC:1.13.11.12]	gi|778693116|ref|XP_004142135.2|//PREDICTED: linoleate 13S-lipoxygenase 2-1, chloroplastic-like [Cucumis sativus];gi|700198983|gb|KGN54141.1|//hypothetical protein Csa_4G288610 [Cucumis sativus]
Csa1G044320	1020	6.91	42.57	2.62307947439345	1.163286e-51	2.46672388627451e-50	Up	NA	NA	NA	K18643//katanin p80 WD40 repeat-containing subunit B1	gi|778657565|ref|XP_004137643.2|//PREDICTED: uncharacterized protein LOC101213420 [Cucumis sativus]
Csa3G150000	1308	3.51	21.61	2.62215613655495	1.124868e-34	1.63286207964206e-33	Up	NA	NA	NA	K00924;K01381//saccharopepsin [EC:3.4.23.25]	gi|449432735|ref|XP_004134154.1|//PREDICTED: basic 7S globulin-like [Cucumis sativus]
Csa5G317890	1731	24.75	152.37	2.62207844948362	0	0	Up	NA	GO:0016405//CoA-ligase activity	NA	K00666//fatty-acyl-CoA synthase [EC:6.2.1.-];K10526//OPC-8:0 CoA ligase 1 [EC:6.2.1.-]	gi|449462360|ref|XP_004148909.1|//PREDICTED: probable acyl-activating enzyme 5, peroxisomal [Cucumis sativus]
Csa3G778430	648	1.61	9.90	2.62036783685235	1.834968e-08	8.32040230328442e-08	Up	GO:0043231//intracellular membrane-bounded organelle;GO:0044444//cytoplasmic part	GO:0016830//carbon-carbon lyase activity	NA	K06966//uncharacterized protein	gi|449437454|ref|XP_004136507.1|//PREDICTED: cytokinin riboside 5'-monophosphate phosphoribohydrolase LOG7 [Cucumis sativus]
Csa1G651710	540	2.22	13.63	2.6181539804551	2.43918e-09	1.19299190653266e-08	Up	NA	NA	NA	K16223//protein FLOWERING LOCUS T	gi|700211541|gb|KGN66637.1|//FT-like protein [Cucumis sativus]
Csa7G024010	1098	8.90	54.41	2.61199458720609	1.752934e-70	5.16227129258699e-69	Up	NA	NA	NA	K04733//interleukin-1 receptor-associated kinase 4 [EC:2.7.11.1];K13473//chitin elicitor-binding protein	gi|449473230|ref|XP_004153824.1|//PREDICTED: lysM domain-containing GPI-anchored protein 2 [Cucumis sativus]
Csa1G042070	3322	3.09	18.88	2.61118002145747	3.45448e-76	1.08986884408428e-74	Up	GO:0016021//integral component of membrane;GO:0005886//plasma membrane;GO:0005802//trans-Golgi network;GO:0000139//Golgi membrane	GO:0000287//magnesium ion binding;GO:0005524//ATP binding;GO:0004012//phospholipid-translocating ATPase activity	GO:0045332//phospholipid translocation;GO:0048194//Golgi vesicle budding	K01530//phospholipid-translocating ATPase [EC:3.6.3.1]	gi|778657179|ref|XP_004137458.2|//PREDICTED: putative phospholipid-transporting ATPase 9 [Cucumis sativus];gi|700209000|gb|KGN64096.1|//hypothetical protein Csa_1G042070 [Cucumis sativus]
Csa3G846010	774	1.66	10.14	2.61080250565642	3.26022e-10	1.69733732334849e-09	Up	NA	NA	NA	NA	gi|778686117|ref|XP_011652332.1|//PREDICTED: uncharacterized protein LOC105435015 [Cucumis sativus]
Csa3G141790	477	1.13	6.86	2.60188580375762	0.0001121804	0.000337773188924981	Up	GO:0042579//microbody	GO:0016863//intramolecular oxidoreductase activity, transposing C=C bonds	GO:0009733//response to auxin;GO:0006631//fatty acid metabolic process;GO:0048588//developmental cell growth;GO:0009850//auxin metabolic process	K18880//very-long-chain (3R)-3-hydroxyacyl-CoA dehydratase [EC:4.2.1.134]	gi|700201750|gb|KGN56883.1|//hypothetical protein Csa_3G141790 [Cucumis sativus]
Csa7G253810	1569	1.02	6.19	2.60137025724277	7.97508e-13	4.95983729329073e-12	Up	GO:0016020//membrane	GO:0005215//transporter activity;GO:0016491//oxidoreductase activity	GO:0006810//transport	K08150//MFS transporter, SP family, solute carrier family 2 (myo-inositol transporter), member 13	gi|778726180|ref|XP_011659070.1|//PREDICTED: polyol transporter 5-like [Cucumis sativus]
Csa3G567330	513	3.39	20.50	2.59626673125646	1.370186e-12	8.39007256244102e-12	Up	NA	GO:0003677//DNA binding;GO:0001071//nucleic acid binding transcription factor activity	GO:0010467//gene expression	K18835//WRKY transcription factor 2;K13424//WRKY transcription factor 33	gi|659098396|ref|XP_008450119.1|//PREDICTED: probable WRKY transcription factor 75 [Cucumis melo]
Csa6G431740	2106	2.88	17.33	2.58913093771786	1.302752e-39	2.13283182775442e-38	Up	GO:0044464//cell part;GO:0016021//integral component of membrane;GO:0005886//plasma membrane	GO:0015604//organic phosphonate transmembrane transporter activity;GO:0005524//ATP binding;GO:0032559//adenyl ribonucleotide binding;GO:0017111//nucleoside-triphosphatase activity;GO:0042626//ATPase activity, coupled to transmembrane movement of substances	GO:0055085//transmembrane transport;GO:0009207//purine ribonucleoside triphosphate catabolic process	K05681//ATP-binding cassette, subfamily G (WHITE), member 2	gi|449444869|ref|XP_004140196.1|//PREDICTED: ABC transporter G family member 23 [Cucumis sativus]
Csa6G501230	270	30.67	184.29	2.58707771741806	4.49748e-47	8.73731992814371e-46	Up	NA	NA	NA	NA	gi|778719285|ref|XP_011657992.1|//PREDICTED: uncharacterized protein LOC105435930 [Cucumis sativus]
Csa2G433910	3441	0.14	0.84	2.58496250072116	0.0001121804	0.000337720950572224	Up	GO:0031224//intrinsic component of membrane	GO:0016759//cellulose synthase activity	GO:0045229//external encapsulating structure organization;GO:0009250//glucan biosynthetic process	K00770//1,4-beta-D-xylan synthase [EC:2.4.2.24]	gi|449460738|ref|XP_004148102.1|//PREDICTED: cellulose synthase-like protein D3 [Cucumis sativus]
Csa7G352500	1581	1.48	8.86	2.58170952292607	8.7486e-18	6.99672340180772e-17	Up	NA	NA	NA	NA	gi|778727057|ref|XP_004149783.2|//PREDICTED: membrane protein of ER body 2-like [Cucumis sativus]
Csa1G145980	1317	5.00	29.93	2.58159227883601	5.4859e-47	1.06151619681909e-45	Up	NA	GO:0016836//hydro-lyase activity	GO:0006558//L-phenylalanine metabolic process	K05359//arogenate/prephenate dehydratase [EC:4.2.1.91 4.2.1.51]	gi|778659368|ref|XP_004139468.2|//PREDICTED: arogenate dehydratase/prephenate dehydratase 6, chloroplastic-like [Cucumis sativus]
Csa2G379360	414	16.65	99.42	2.57801392598398	2.96452e-43	5.31375196316759e-42	Up	NA	NA	NA	NA	gi|700207786|gb|KGN62905.1|//hypothetical protein Csa_2G379360 [Cucumis sativus]
Csa6G521000	1863	8.47	50.51	2.576135167099	2.37072e-104	1.07321943069767e-102	Up	NA	GO:0046872//metal ion binding;GO:0016491//oxidoreductase activity	GO:0055114//oxidation-reduction process	K05278//flavonol synthase [EC:1.14.11.23];K05277//leucoanthocyanidin dioxygenase [EC:1.14.11.19];K06892//feruloyl-CoA ortho-hydroxylase [EC:1.14.11.-]	gi|449434270|ref|XP_004134919.1|//PREDICTED: protein SRG1-like [Cucumis sativus];gi|700194149|gb|KGN49353.1|//hypothetical protein Csa_6G521000 [Cucumis sativus]
BGI_novel_G000109	2005	5.89	35.12	2.5759533057049	3.09136e-84	1.08621685487365e-82	Up	NA	NA	NA	K01673//carbonic anhydrase [EC:4.2.1.1]	gi|449469779|ref|XP_004152596.1|//PREDICTED: beta carbonic anhydrase 5, chloroplastic-like isoform X2 [Cucumis sativus]
Csa6G445750	2127	3.35	19.92	2.57198464672295	2.86818e-51	5.99055706866953e-50	Up	GO:0044424//intracellular part	GO:0016840//carbon-nitrogen lyase activity	GO:0006558//L-phenylalanine metabolic process	K10775//phenylalanine ammonia-lyase [EC:4.3.1.24]	gi|778717121|ref|XP_011657651.1|//PREDICTED: phenylalanine ammonia-lyase [Cucumis sativus]
Csa2G139860	2208	4.51	26.77	2.5694178003854	3.92198e-49	7.91963305809129e-48	Up	GO:0016021//integral component of membrane	GO:0016705//oxidoreductase activity, acting on paired donors, with incorporation or reduction of molecular oxygen;GO:0020037//heme binding;GO:0005506//iron ion binding;GO:0008270//zinc ion binding;GO:0004497//monooxygenase activity	GO:0055114//oxidation-reduction process	K10717//cytokinin trans-hydroxylase;K03452//magnesium/proton exchanger;K10683//BRCA1-associated RING domain protein 1;K11000//callose synthase [EC:2.4.1.-]	gi|778668469|ref|XP_004139011.2|//PREDICTED: cytochrome P450 714C2-like [Cucumis sativus];gi|449442481|ref|XP_004139010.1|//PREDICTED: pentatricopeptide repeat-containing protein At1g04840 [Cucumis sativus];gi|700206365|gb|KGN61484.1|//hypothetical protein Csa_2G139860 [Cucumis sativus]
Csa1G025960	1731	15.53	91.74	2.56249307769466	7.49036e-185	6.31200639653679e-183	Up	NA	NA	NA	K13424//WRKY transcription factor 33	gi|525507238|ref|NP_001267657.1|//uncharacterized protein LOC101207158 [Cucumis sativus]
Csa3G167380	531	9.03	53.31	2.56160828926898	2.99858e-31	3.93596481995954e-30	Up	NA	NA	NA	K02183//calmodulin	gi|700202041|gb|KGN57174.1|//hypothetical protein Csa_3G167380 [Cucumis sativus]
Csa2G009440	580	78.41	459.97	2.55243020435146	2.6636e-292	4.18142238709677e-290	Up	NA	NA	NA	NA	gi|700205637|gb|KGN60756.1|//hypothetical protein Csa_2G009440 [Cucumis sativus];gi|449442991|ref|XP_004139264.1|//PREDICTED: uncharacterized protein LOC101209679 [Cucumis sativus]
Csa3G730710	648	17.50	102.22	2.54625066928052	2.28632e-72	6.90007831317829e-71	Up	NA	NA	NA	K03239//translation initiation factor eIF-2B subunit alpha	gi|449439823|ref|XP_004137685.1|//PREDICTED: protein LURP-one-related 10 [Cucumis sativus]
Csa2G425750	1530	5.24	30.57	2.54447783534952	6.12908e-55	1.37769828267898e-53	Up	NA	NA	NA	K00517;K13260//isoflavone 2'-hydroxylase [EC:1.14.13.89]	gi|778673623|ref|XP_011650031.1|//PREDICTED: isoflavone 2'-hydroxylase-like [Cucumis sativus]
Csa4G430880	2703	1.88	10.95	2.5421263028109	6.20162e-36	9.27194584639017e-35	Up	NA	GO:0004558//alpha-1,4-glucosidase activity;GO:0005488//binding	GO:0044238//primary metabolic process	K01187//alpha-glucosidase [EC:3.2.1.20]	gi|700199548|gb|KGN54706.1|//hypothetical protein Csa_4G430880 [Cucumis sativus]
Csa4G179700	2596	4.73	27.51	2.54004405097682	1.235112e-84	4.37139821672727e-83	Up	GO:0044464//cell part;GO:0016021//integral component of membrane	GO:0015197//peptide transporter activity	GO:0055085//transmembrane transport;GO:0015833//peptide transport;GO:0009628//response to abiotic stimulus	K04773//protease IV [EC:3.4.21.-]	gi|700198728|gb|KGN53886.1|//hypothetical protein Csa_4G179700 [Cucumis sativus];gi|449459618|ref|XP_004147543.1|//PREDICTED: oligopeptide transporter 4 [Cucumis sativus]
Csa6G354370	951	3.06	17.66	2.52888178495581	7.69254e-20	6.81579352025489e-19	Up	NA	NA	NA	K04730//interleukin-1 receptor-associated kinase 1 [EC:2.7.11.1]	gi|700192311|gb|KGN47515.1|//hypothetical protein Csa_6G354370 [Cucumis sativus]
Csa6G318680	297	6.93	39.92	2.52618446320005	2.70664e-12	1.62665805001544e-11	Up	NA	NA	NA	NA	gi|700192217|gb|KGN47421.1|//hypothetical protein Csa_6G318680 [Cucumis sativus]
Csa3G881760	1836	1.78	10.25	2.52567476342641	2.76788e-23	2.86440999893674e-22	Up	GO:0016020//membrane	GO:0004672//protein kinase activity	NA	K04733//interleukin-1 receptor-associated kinase 4 [EC:2.7.11.1];K04730//interleukin-1 receptor-associated kinase 1 [EC:2.7.11.1]	gi|778687208|ref|XP_004136455.2|//PREDICTED: G-type lectin S-receptor-like serine/threonine-protein kinase SD2-5 [Cucumis sativus];gi|700205030|gb|KGN60163.1|//hypothetical protein Csa_3G881760 [Cucumis sativus]
Csa7G071440	762	2.53	14.54	2.52281797922528	2.15786e-13	1.39043041244621e-12	Up	NA	NA	NA	NA	gi|449438625|ref|XP_004137088.1|//PREDICTED: zinc finger protein ZAT10 [Cucumis sativus]
Csa7G259390	1071	3.05	17.45	2.51634588864677	3.41712e-22	3.37310638539554e-21	Up	NA	NA	NA	NA	gi|778726203|ref|XP_004151481.2|//PREDICTED: uncharacterized protein LOC101212185 [Cucumis sativus]
Csa6G020730	921	1.71	9.73	2.50844347989521	3.04566e-12	1.82252743805718e-11	Up	GO:0016021//integral component of membrane	NA	NA	NA	gi|700190705|gb|KGN45909.1|//hypothetical protein Csa_6G020230 [Cucumis sativus]
Csa4G003620	504	15.16	86.07	2.50524071531873	1.465734e-45	2.74609990798845e-44	Up	NA	NA	GO:0050896//response to stimulus	NA	gi|449469038|ref|XP_004152228.1|//PREDICTED: universal stress protein A-like protein [Cucumis sativus]
Csa6G501300	2146	3.86	21.85	2.50096052711988	4.31298e-48	8.54084116785351e-47	Up	NA	NA	NA	K07409//cytochrome P450, family 1, subfamily A, polypeptide 2 [EC:1.14.14.1];K09755//ferulate-5-hydroxylase [EC:1.14.-.-];K14985//26-hydroxylase [EC:1.14.-.-];K00512//steroid 17alpha-monooxygenase / 17alpha-hydroxyprogesterone aldolase [EC:1.14.14.19 4.1.2.30];K07408//cytochrome P450, family 1, subfamily A, polypeptide 1 [EC:1.14.14.1]	gi|778719319|ref|XP_004143566.2|//PREDICTED: cytochrome P450 CYP736A12-like [Cucumis sativus];gi|700193585|gb|KGN48789.1|//hypothetical protein Csa_6G501300 [Cucumis sativus]
Csa6G509040	975	2.20	12.43	2.49825086752783	1.160812e-14	7.99871376707965e-14	Up	NA	GO:0016798//hydrolase activity, acting on glycosyl bonds	GO:0043170//macromolecule metabolic process;GO:0005975//carbohydrate metabolic process;GO:0009056//catabolic process	K01183//chitinase [EC:3.2.1.14]	gi|700193780|gb|KGN48984.1|//hypothetical protein Csa_6G509040 [Cucumis sativus]
Csa4G608160	1368	43.57	245.63	2.4950797565446	0	0	Up	NA	GO:0016702//oxidoreductase activity, acting on single donors with incorporation of molecular oxygen, incorporation of two atoms of oxygen	GO:0006520//cellular amino acid metabolic process	K00457//4-hydroxyphenylpyruvate dioxygenase [EC:1.13.11.27]	gi|449453770|ref|XP_004144629.1|//PREDICTED: 4-hydroxyphenylpyruvate dioxygenase [Cucumis sativus]
Csa3G019320	789	0.81	4.56	2.49304001128012	4.21732e-05	0.000134713408467345	Up	NA	NA	NA	NA	gi|449459050|ref|XP_004147259.1|//PREDICTED: uncharacterized protein LOC101212248 [Cucumis sativus]
Csa1G042890	1989	0.37	2.08	2.49098635251214	5.42956e-06	1.91783369551805e-05	Up	NA	NA	NA	K08819//cyclin-dependent kinase 12/13 [EC:2.7.11.22 2.7.11.23]	gi|700209086|gb|KGN64182.1|//hypothetical protein Csa_1G042890 [Cucumis sativus]
Csa6G504460	1536	4.71	26.42	2.48783150163404	7.10898e-47	1.37013271960396e-45	Up	NA	NA	NA	K08900//mitochondrial chaperone BCS1	gi|778719542|ref|XP_004149988.2|//PREDICTED: mitochondrial chaperone BCS1-like [Cucumis sativus]
Csa2G006070	1044	1.44	8.06	2.48471102708566	1.478674e-10	7.90765606703297e-10	Up	NA	GO:0005488//binding	NA	K18753//butyrate response factor 1;K15308//tristetraprolin	gi|449443305|ref|XP_004139420.1|//PREDICTED: zinc finger CCCH domain-containing protein 39-like [Cucumis sativus]
Csa6G498430	1401	2.08	11.62	2.48195463526344	1.30886e-19	1.14509073078652e-18	Up	NA	GO:0016758//transferase activity, transferring hexosyl groups	NA	K12937//cyanidin-3-O-glucoside 2''-O-glucuronosyltransferase [EC:2.4.1.254];K18823//soyasaponin III rhamnosyltransferase [EC:2.4.1.273]	gi|778718967|ref|XP_004143546.2|//PREDICTED: UDP-glycosyltransferase 91A1-like [Cucumis sativus]
Csa3G852600	1599	3.16	17.59	2.47675901929486	8.93572e-33	1.23538867556818e-31	Up	NA	NA	NA	K00517	gi|778686458|ref|XP_011652395.1|//PREDICTED: cytochrome P450 82A3 [Cucumis sativus]
Csa7G432230	294	15.04	83.42	2.47158874521159	2.42866e-23	2.51871579968034e-22	Up	NA	NA	NA	NA	gi|700190009|gb|KGN45242.1|//hypothetical protein Csa_7G432230 [Cucumis sativus]
Csa6G522650	786	0.65	3.59	2.4654722207946	0.00033368	0.000934726562095265	Up	NA	GO:0003677//DNA binding;GO:0001071//nucleic acid binding transcription factor activity	GO:0010467//gene expression	K18835//WRKY transcription factor 2;K08819//cyclin-dependent kinase 12/13 [EC:2.7.11.22 2.7.11.23]	gi|700194167|gb|KGN49371.1|//hypothetical protein Csa_6G522650 [Cucumis sativus]
Csa4G608130	1689	3.13	17.27	2.46403352059631	8.37064e-34	1.18849655900802e-32	Up	NA	GO:0004175//endopeptidase activity	GO:0019538//protein metabolic process	K00924;K01381//saccharopepsin [EC:3.4.23.25]	gi|778695350|ref|XP_011653979.1|//PREDICTED: aspartic proteinase nepenthesin-1 [Cucumis sativus]
Csa2G171820	1686	0.66	3.63	2.4594316186373	3.60562e-08	1.59082046509519e-07	Up	GO:0044464//cell part	NA	NA	K18810//cyclin D1/2/4, plant;K05747//Wiskott-Aldrich syndrome protein	gi|449458910|ref|XP_004147189.1|//PREDICTED: uncharacterized protein LOC101215059 [Cucumis sativus]
CsaUNG019690	1569	12.49	68.64	2.45827607589159	1.213872e-119	6.43848292970027e-118	Up	GO:0031224//intrinsic component of membrane	GO:0016628//oxidoreductase activity, acting on the CH-CH group of donors, NAD or NADP as acceptor;GO:0022857//transmembrane transporter activity	GO:0071702//organic substance transport;GO:0008152//metabolic process	K08150//MFS transporter, SP family, solute carrier family 2 (myo-inositol transporter), member 13	gi|659130996|ref|XP_008465463.1|//PREDICTED: sugar transport protein 14-like [Cucumis melo]
Csa1G186610	1777	32.65	179.13	2.45585207766326	0	0	Up	GO:0016021//integral component of membrane	GO:0005215//transporter activity	GO:0055085//transmembrane transport;GO:0006814//sodium ion transport	K14445//solute carrier family 13 (sodium-dependent dicarboxylate transporter), member 2/3/5	gi|449443554|ref|XP_004139542.1|//PREDICTED: tonoplast dicarboxylate transporter [Cucumis sativus]
Csa6G524660	1614	4.12	22.60	2.45560653011933	1.26604e-41	2.18094996814159e-40	Up	NA	NA	NA	K08818//cell division cycle 2-like [EC:2.7.11.22]	gi|449433601|ref|XP_004134586.1|//PREDICTED: uncharacterized protein LOC101217408 [Cucumis sativus]
Csa5G590010	1293	0.51	2.78	2.44651573075201	2.68254e-05	8.77471410519241e-05	Up	GO:0043231//intracellular membrane-bounded organelle;GO:0005634//nucleus;GO:0000502//proteasome complex;GO:0005737//cytoplasm;GO:0005839//proteasome core complex	GO:0004175//endopeptidase activity;GO:0004298//threonine-type endopeptidase activity	GO:0006508//proteolysis;GO:0051603//proteolysis involved in cellular protein catabolic process	K02737//20S proteasome subunit beta 5 [EC:3.4.25.1]	gi|700196507|gb|KGN51684.1|//hypothetical protein Csa_5G590010 [Cucumis sativus]
Csa6G425740	777	1.49	8.11	2.44438958375511	6.13084e-08	2.6544246316726e-07	Up	NA	NA	NA	NA	gi|700192833|gb|KGN48037.1|//hypothetical protein Csa_6G425740 [Cucumis sativus]
Csa6G031970	684	1.33	7.23	2.44256940144993	2.0633e-06	7.60829660920629e-06	Up	NA	NA	NA	K19476//vacuolar protein sorting-associated protein IST1	gi|778710094|ref|XP_011656518.1|//PREDICTED: uncharacterized protein LOC101210797 [Cucumis sativus]
Csa6G504480	1640	0.84	4.56	2.44057259138598	1.098056e-09	5.52176649341256e-09	Up	GO:0016021//integral component of membrane	GO:0005524//ATP binding	NA	K08900//mitochondrial chaperone BCS1	gi|778719542|ref|XP_004149988.2|//PREDICTED: mitochondrial chaperone BCS1-like [Cucumis sativus];gi|778719545|ref|XP_004150003.2|//PREDICTED: uncharacterized AAA domain-containing protein C31G5.19-like [Cucumis sativus]
Csa4G614170	711	0.91	4.92	2.43471986514054	7.21308e-05	0.00022301431905972	Up	NA	NA	NA	K12741//heterogeneous nuclear ribonucleoprotein A1/A3;K14491//two-component response regulator ARR-B family;K14317//nuclear pore complex protein Nup214	gi|778695370|ref|XP_011653983.1|//PREDICTED: uncharacterized protein LOC105435279 [Cucumis sativus]
Csa1G042270	720	1.43	7.73	2.43445326714646	4.61804e-07	1.82046915026326e-06	Up	NA	NA	NA	NA	gi|778664755|ref|XP_011660345.1|//PREDICTED: uncharacterized protein LOC105436376 [Cucumis sativus]
Csa7G075600	1437	1.29	6.96	2.43171624042547	3.04392e-12	1.8226067892956e-11	Up	NA	GO:0005506//iron ion binding;GO:0016491//oxidoreductase activity	NA	K01723//hydroperoxide dehydratase [EC:4.2.1.92]	gi|449438458|ref|XP_004137005.1|//PREDICTED: allene oxide synthase, chloroplastic-like [Cucumis sativus]
Csa1G045480	2047	0.57	3.06	2.42449782852791	6.67874e-08	2.87756425055334e-07	Up	NA	NA	NA	K18835//WRKY transcription factor 2;K13424//WRKY transcription factor 33	gi|449469657|ref|XP_004152535.1|//PREDICTED: probable WRKY transcription factor 61 [Cucumis sativus];gi|700209154|gb|KGN64250.1|//hypothetical protein Csa_1G045480 [Cucumis sativus]
Csa3G000690	1621	2.32	12.40	2.41814341014667	9.29508e-21	8.63666001336515e-20	Up	GO:0016021//integral component of membrane	NA	GO:0055085//transmembrane transport	K07088//uncharacterized protein	gi|778674571|ref|XP_011650245.1|//PREDICTED: uncharacterized transporter YBR287W-like [Cucumis sativus]
Csa7G398090	788	167.75	896.01	2.41720206727472	0	0	Up	NA	NA	GO:0006950//response to stress	NA	gi|449436481|ref|XP_004136021.1|//PREDICTED: indole-3-acetic acid-induced protein ARG2 [Cucumis sativus]
Csa6G398200	1017	10.52	56.19	2.4171786956719	1.56889e-61	3.95084252781371e-60	Up	NA	NA	NA	NA	gi|778715735|ref|XP_011657442.1|//PREDICTED: uncharacterized protein LOC105435860 [Cucumis sativus]
Csa5G319910	1719	5.86	31.14	2.40979637465679	3.3759e-59	8.14315605947955e-58	Up	NA	GO:0003824//catalytic activity	NA	K00666//fatty-acyl-CoA synthase [EC:6.2.1.-];K10526//OPC-8:0 CoA ligase 1 [EC:6.2.1.-]	gi|700195724|gb|KGN50901.1|//Acyl:coa ligase acetate-coa synthetase-like protein [Cucumis sativus]
Csa2G026940	360	8.20	43.43	2.40499613794845	4.17172e-16	3.10186025668449e-15	Up	NA	GO:0016702//oxidoreductase activity, acting on single donors with incorporation of molecular oxygen, incorporation of two atoms of oxygen;GO:0046914//transition metal ion binding	GO:0006633//fatty acid biosynthetic process	K15718//linoleate 9S-lipoxygenase [EC:1.13.11.58]	gi|700205811|gb|KGN60930.1|//hypothetical protein Csa_2G026940 [Cucumis sativus]
Csa2G176190	321	142.75	756.00	2.40489548885823	1.03418e-214	1.006567394e-212	Up	NA	NA	NA	NA	gi|778668784|ref|XP_004147144.2|//PREDICTED: repetitive proline-rich cell wall protein 3-like [Cucumis sativus]
Csa3G733870	2462	0.29	1.53	2.39940684756508	1.581502e-05	5.3032761295435e-05	Up	GO:0016021//integral component of membrane	GO:0004674//protein serine/threonine kinase activity;GO:0005524//ATP binding	GO:0006468//protein phosphorylation;GO:0048544//recognition of pollen	K04733//interleukin-1 receptor-associated kinase 4 [EC:2.7.11.1];K03327//multidrug resistance protein, MATE family;K00276//primary-amine oxidase [EC:1.4.3.21];K04730//interleukin-1 receptor-associated kinase 1 [EC:2.7.11.1]	gi|449440307|ref|XP_004137926.1|//PREDICTED: putative receptor protein kinase ZmPK1 [Cucumis sativus];gi|700203700|gb|KGN58833.1|//hypothetical protein Csa_3G733870 [Cucumis sativus]
Csa2G033950	2280	3.68	19.21	2.38407984760851	1.453496e-48	2.90788829763618e-47	Up	GO:0016021//integral component of membrane	GO:0046872//metal ion binding;GO:0015405//P-P-bond-hydrolysis-driven transmembrane transporter activity;GO:0016462//pyrophosphatase activity;GO:0016628//oxidoreductase activity, acting on the CH-CH group of donors, NAD or NADP as acceptor	GO:0008152//metabolic process;GO:0006818//hydrogen transport	K01507//inorganic pyrophosphatase [EC:3.6.1.1]	gi|449454024|ref|XP_004144756.1|//PREDICTED: pyrophosphate-energized vacuolar membrane proton pump 1 [Cucumis sativus]
Csa1G058140	1109	32.03	166.27	2.37603218424805	5.85806e-206	5.58985274313725e-204	Up	NA	NA	NA	K01054//acylglycerol lipase [EC:3.1.1.23];K18368//caffeoylshikimate esterase [EC:3.1.1.-]	gi|449472068|ref|XP_004153486.1|//PREDICTED: caffeoylshikimate esterase-like [Cucumis sativus]
Csa6G518000	363	605.95	3142.36	2.37457781074831	0	0	Up	NA	NA	NA	NA	gi|449433824|ref|XP_004134697.1|//PREDICTED: auxin-repressed 12.5 kDa protein [Cucumis sativus]
Csa2G431070	1380	12.48	64.43	2.36811466055918	2.79838e-94	1.13485968916667e-92	Up	NA	GO:0016746//transferase activity, transferring acyl groups	NA	K18858//(Z)-3-hexen-1-ol acetyltransferase [EC:2.3.1.195]	gi|449466689|ref|XP_004151058.1|//PREDICTED: benzyl alcohol O-benzoyltransferase-like [Cucumis sativus]
Csa4G624960	3622	10.21	52.05	2.34991529730898	1.942808e-202	1.79235547526066e-200	Up	NA	NA	NA	K04733//interleukin-1 receptor-associated kinase 4 [EC:2.7.11.1]	gi|700199883|gb|KGN55041.1|//hypothetical protein Csa_4G624960 [Cucumis sativus];gi|778695661|ref|XP_004146083.2|//PREDICTED: probable LRR receptor-like serine/threonine-protein kinase At1g53430 [Cucumis sativus]
BGI_novel_G000099	1832	0.41	2.09	2.3498071274628	2.68254e-05	8.77323985887097e-05	Up	NA	NA	NA	K13081//leucoanthocyanidin reductase [EC:1.17.1.3]	gi|778669354|ref|XP_004148840.2|//PREDICTED: isoflavone reductase-like protein [Cucumis sativus]
Csa5G524780	1092	7.23	36.83	2.34881384494862	1.467048e-42	2.57972505582656e-41	Up	NA	GO:0016491//oxidoreductase activity	GO:0008152//metabolic process	K09753//cinnamoyl-CoA reductase [EC:1.2.1.44]	gi|449450099|ref|XP_004142801.1|//PREDICTED: cinnamoyl-CoA reductase 1 [Cucumis sativus]
Csa2G336130	663	26.67	134.52	2.33453095397566	9.7556e-88	3.61031387072243e-86	Up	NA	NA	NA	K01800//maleylacetoacetate isomerase [EC:5.2.1.2]	gi|778670299|ref|XP_011649432.1|//PREDICTED: glutathione S-transferase 2 isoform X2 [Cucumis sativus]
Csa1G605740	2376	0.67	3.37	2.33051559072409	7.83746e-10	3.97820068735332e-09	Up	NA	NA	NA	K04733//interleukin-1 receptor-associated kinase 4 [EC:2.7.11.1];K00276//primary-amine oxidase [EC:1.4.3.21]	gi|700211349|gb|KGN66445.1|//hypothetical protein Csa_1G605740 [Cucumis sativus]
Csa2G350420	270	6.13	30.81	2.32943970334857	4.2412e-08	1.86027938711131e-07	Up	NA	NA	NA	NA	gi|449450387|ref|XP_004142944.1|//PREDICTED: uncharacterized protein LOC101222643 [Cucumis sativus]
Csa4G010990	786	14.34	72.06	2.32915362772489	3.6297e-57	8.44154602150537e-56	Up	NA	NA	NA	NA	gi|778689846|ref|XP_011653028.1|//PREDICTED: GEM-like protein 5 [Cucumis sativus]
Csa1G002060	1245	20.89	104.86	2.32758005344925	5.98018e-134	3.61522310186335e-132	Up	NA	GO:0016772//transferase activity, transferring phosphorus-containing groups	GO:0006796//phosphate-containing compound metabolic process	NA	gi|449440558|ref|XP_004138051.1|//PREDICTED: SNF1-related protein kinase regulatory subunit gamma-1 [Cucumis sativus]
Csa6G446470	1062	21.07	105.68	2.32644015242952	1.38935e-116	7.02469794805195e-115	Up	NA	NA	NA	K07213//copper chaperone	gi|778717191|ref|XP_011657664.1|//PREDICTED: uncharacterized protein LOC101221463 [Cucumis sativus]
Csa4G651800	528	9.34	46.79	2.32470577365065	1.260436e-24	1.36612734832962e-23	Up	NA	NA	NA	NA	gi|449455679|ref|XP_004145579.1|//PREDICTED: VQ motif-containing protein 11 [Cucumis sativus]
BGI_novel_G000065	1629	0.83	4.14	2.3184475261524	2.5362e-08	1.13754998156682e-07	Up	NA	NA	NA	NA	gi|778662264|ref|XP_004135768.2|//PREDICTED: uncharacterized protein LOC101205246 isoform X2 [Cucumis sativus]
Csa3G550680	4334	2.23	11.05	2.30893075435849	4.46268e-50	9.12505555462185e-49	Up	GO:0044464//cell part;GO:0016021//integral component of membrane	GO:0005524//ATP binding;GO:0032559//adenyl ribonucleotide binding;GO:0017111//nucleoside-triphosphatase activity;GO:0016887//ATPase activity	GO:0006810//transport;GO:0009207//purine ribonucleoside triphosphate catabolic process	K05681//ATP-binding cassette, subfamily G (WHITE), member 2	gi|778681569|ref|XP_011651542.1|//PREDICTED: pleiotropic drug resistance protein 1-like [Cucumis sativus]
Csa3G133880	1045	3.81	18.87	2.30823152010712	1.527524e-24	1.65101511293726e-23	Up	NA	NA	NA	K00799//glutathione S-transferase [EC:2.5.1.18]	gi|778678023|ref|XP_004134391.2|//PREDICTED: probable glutathione S-transferase [Cucumis sativus]
Csa1G064870	2177	0.62	3.07	2.3078985349833	2.5362e-08	1.13781215026504e-07	Up	NA	NA	NA	K04733//interleukin-1 receptor-associated kinase 4 [EC:2.7.11.1];K04730//interleukin-1 receptor-associated kinase 1 [EC:2.7.11.1]	gi|700209469|gb|KGN64565.1|//hypothetical protein Csa_1G064870 [Cucumis sativus];gi|778664875|ref|XP_011648425.1|//PREDICTED: cysteine-rich receptor-like protein kinase 25 [Cucumis sativus]
Csa2G379920	429	0.96	4.75	2.30682120249715	5.10108e-06	1.80606808439433e-05	Up	NA	NA	NA	K14771//U3 small nucleolar RNA-associated protein 19	gi|778672397|ref|XP_011649798.1|//PREDICTED: EG45-like domain containing protein [Cucumis sativus]
Csa4G627220	1350	5.60	27.69	2.30586632142196	2.60774e-39	4.22315031946755e-38	Up	GO:0016020//membrane;GO:0005618//cell wall;GO:0005576//extracellular region	GO:0030246//carbohydrate binding	NA	K14962//COMPASS component SWD2;K00276//primary-amine oxidase [EC:1.4.3.21];K03327//multidrug resistance protein, MATE family	gi|449456713|ref|XP_004146093.1|//PREDICTED: epidermis-specific secreted glycoprotein EP1-like [Cucumis sativus]
Csa1G540370	1958	3.28	16.20	2.3042260931539	1.524312e-38	2.42222509322449e-37	Up	NA	NA	NA	K00102//D-lactate dehydrogenase (cytochrome) [EC:1.1.2.4];K00279//cytokinin dehydrogenase [EC:1.5.99.12]	gi|449435914|ref|XP_004135739.1|//PREDICTED: cannabidiolic acid synthase-like [Cucumis sativus];gi|700210846|gb|KGN65942.1|//hypothetical protein Csa_1G540370 [Cucumis sativus]
Csa3G835820	1065	6.01	29.58	2.29918515638788	8.55842e-33	1.18490898805121e-31	Up	NA	NA	NA	NA	gi|778685770|ref|XP_011652271.1|//PREDICTED: uncharacterized protein LOC105435006 [Cucumis sativus]
BGI_novel_G000104	1047	1.32	6.48	2.29545588352617	4.2412e-08	1.86069865224251e-07	Up	NA	NA	NA	K09422//myb proto-oncogene protein, plant	gi|778670368|ref|XP_004147356.2|//PREDICTED: myb-related protein 330-like [Cucumis sativus]
Csa3G435530	570	21.55	105.62	2.29312327209498	1.894238e-57	4.43187943605769e-56	Up	NA	NA	NA	NA	gi|449462916|ref|XP_004149181.1|//PREDICTED: uncharacterized protein LOC101218329 [Cucumis sativus]
Csa4G046710	1008	2.50	12.25	2.29278174922785	1.232684e-13	8.04136284986595e-13	Up	GO:0030312//external encapsulating structure;GO:0005576//extracellular region	NA	NA	K01188//beta-glucosidase [EC:3.2.1.21];K13428//LRR receptor-like serine/threonine-protein kinase EFR [EC:2.7.11.1];K13420//LRR receptor-like serine/threonine-protein kinase FLS2 [EC:2.7.11.1]	gi|525507154|ref|NP_001267615.1|//polygalacturonase inhibitor-like precursor [Cucumis sativus]
Csa1G479630	1113	26.43	129.41	2.29170077404651	7.21028e-144	4.80668871506849e-142	Up	NA	GO:0032559//adenyl ribonucleotide binding;GO:0004702//receptor signaling protein serine/threonine kinase activity	GO:0006464//cellular protein modification process	K04371//mitogen-activated protein kinase 1/3 [EC:2.7.11.24]	gi|525507230|ref|NP_001267653.1|//mitogen-activated protein kinase 3-like [Cucumis sativus]
Csa3G727990	990	65.44	320.36	2.29144937137002	0	0	Up	NA	GO:0003677//DNA binding;GO:0001071//nucleic acid binding transcription factor activity	GO:0010467//gene expression	K18835//WRKY transcription factor 2;K13424//WRKY transcription factor 33;K16225//probable WRKY transcription factor 52	gi|700203548|gb|KGN58681.1|//WRKY transcription factor [Cucumis sativus]
Csa7G037600	780	81.58	397.54	2.28481261770937	2.79962e-275	4.06697036716418e-273	Up	NA	NA	NA	K12741//heterogeneous nuclear ribonucleoprotein A1/A3	gi|700188223|gb|KGN43456.1|//hypothetical protein Csa_7G037600 [Cucumis sativus]
Csa2G352420	924	28.64	139.49	2.28405830163336	1.05985e-126	5.9800116231884e-125	Up	NA	GO:0046914//transition metal ion binding	NA	K15172//transcription elongation factor SPT5	gi|700207293|gb|KGN62412.1|//hypothetical protein Csa_2G352420 [Cucumis sativus]
Csa3G889760	1461	4.74	23.05	2.28180778641844	2.76906e-35	4.0742646984127e-34	Up	NA	GO:0035251//UDP-glucosyltransferase activity	NA	K13493//cytokinin-N-glucosyltransferase [EC:2.4.1.-];K13030//cyanohydrin beta-glucosyltransferase [EC:2.4.1.85]	gi|449437008|ref|XP_004136284.1|//PREDICTED: 7-deoxyloganetin glucosyltransferase [Cucumis sativus]
Csa5G606390	2493	0.97	4.71	2.27967040742566	2.04852e-13	1.32216479840849e-12	Up	NA	NA	NA	K14514//ethylene-insensitive protein 3	gi|778705485|ref|XP_011655693.1|//PREDICTED: phosphate transporter PHO1 homolog 3-like [Cucumis sativus]
Csa4G285750	1017	4.21	20.42	2.27809072781141	7.53076e-22	7.30412427304434e-21	Up	NA	GO:0016209//antioxidant activity;GO:0005506//iron ion binding;GO:0003824//catalytic activity	GO:0008152//metabolic process;GO:0006950//response to stress	K00430//peroxidase [EC:1.11.1.7]	gi|778693034|ref|XP_004151584.2|//PREDICTED: peroxidase 2-like [Cucumis sativus]
Csa2G138750	456	1.49	7.22	2.27668650642501	0.00035026	0.000977374019495413	Up	NA	NA	NA	K04733//interleukin-1 receptor-associated kinase 4 [EC:2.7.11.1];K04730//interleukin-1 receptor-associated kinase 1 [EC:2.7.11.1]	gi|449442471|ref|XP_004139005.1|//PREDICTED: receptor like protein kinase S.2 [Cucumis sativus]
Csa5G484630	1101	2.84	13.76	2.27651763519742	2.264e-16	1.70884156649864e-15	Up	NA	GO:0070011//peptidase activity, acting on L-amino acid peptides;GO:0046872//metal ion binding	GO:0008152//metabolic process	K07761//gelatinase A [EC:3.4.24.24];K07999//matrix metalloproteinase-20 (enamelysin) [EC:3.4.24.-];K01402//matrix metalloproteinase-8 (neutrophil collagenase) [EC:3.4.24.34]	gi|449452078|ref|XP_004143787.1|//PREDICTED: metalloendoproteinase 1-like [Cucumis sativus]
Csa3G215590	378	11.11	53.71	2.27333190476644	6.98452e-19	5.89595257241977e-18	Up	NA	GO:0046914//transition metal ion binding	NA	NA	gi|449464494|ref|XP_004149964.1|//PREDICTED: basic blue protein-like [Cucumis sativus]
Csa3G020040	1745	3.63	17.52	2.27096132160542	5.21082e-28	6.24592500738916e-27	Up	GO:0016021//integral component of membrane	GO:0016740//transferase activity	NA	K00750//glycogenin glucosyltransferase [EC:2.4.1.186]	gi|778675394|ref|XP_004147207.2|//PREDICTED: putative glucuronosyltransferase PGSIP8 [Cucumis sativus]
Csa1G470460	519	1.29	6.22	2.26954351470735	0.00035026	0.00097723393435574	Up	NA	NA	NA	K14496//abscisic acid receptor PYR/PYL family	gi|778661200|ref|XP_004151716.2|//PREDICTED: abscisic acid receptor PYL12-like [Cucumis sativus]
Csa6G223500	1502	1.52	7.32	2.26777232484046	4.84508e-11	2.68395922822994e-10	Up	NA	GO:0003824//catalytic activity	NA	K15889//prenylcysteine alpha-carboxyl methylesterase [EC:3.1.1.-]	gi|778714121|ref|XP_011657191.1|//PREDICTED: isoprenylcysteine alpha-carbonyl methylesterase ICME-like [Cucumis sativus]
Csa7G450730	4390	19.57	94.19	2.26693014340386	0	0	Up	GO:0031224//intrinsic component of membrane;GO:0016021//integral component of membrane	GO:0000287//magnesium ion binding;GO:0046872//metal ion binding;GO:0042625//ATPase coupled ion transmembrane transporter activity;GO:0005524//ATP binding;GO:0032559//adenyl ribonucleotide binding;GO:0004012//phospholipid-translocating ATPase activity;GO:0005548//phospholipid transporter activity	GO:0045332//phospholipid translocation;GO:0006869//lipid transport;GO:0009206//purine ribonucleoside triphosphate biosynthetic process	K01530//phospholipid-translocating ATPase [EC:3.6.3.1]	gi|449447866|ref|XP_004141687.1|//PREDICTED: putative phospholipid-transporting ATPase 4 isoform X2 [Cucumis sativus]
Csa7G432210	318	23.23	111.78	2.26660102085399	1.31048e-30	1.6995205649567e-29	Up	NA	NA	NA	NA	gi|700190007|gb|KGN45240.1|//hypothetical protein Csa_7G432210 [Cucumis sativus]
Csa3G144110	1896	13.17	63.33	2.2656337338118	8.01182e-122	4.34423643788301e-120	Up	NA	GO:0004672//protein kinase activity	GO:0043170//macromolecule metabolic process	K04733//interleukin-1 receptor-associated kinase 4 [EC:2.7.11.1];K13429//chitin elicitor receptor kinase 1;K04730//interleukin-1 receptor-associated kinase 1 [EC:2.7.11.1]	gi|778678340|ref|XP_011650952.1|//PREDICTED: lysM domain receptor-like kinase 4 [Cucumis sativus]
Csa3G736970	972	51.41	246.69	2.26257831751776	2.85518e-232	3.15789397045454e-230	Up	GO:0044464//cell part	GO:0016209//antioxidant activity;GO:0005506//iron ion binding;GO:0003824//catalytic activity	GO:0008152//metabolic process;GO:0006952//defense response	K00430//peroxidase [EC:1.11.1.7]	gi|449440083|ref|XP_004137814.1|//PREDICTED: peroxidase 21-like [Cucumis sativus]
Csa4G624460	3434	9.91	47.47	2.26005908724294	1.914106e-167	1.48446164924303e-165	Up	NA	NA	NA	K04733//interleukin-1 receptor-associated kinase 4 [EC:2.7.11.1]	gi|700199882|gb|KGN55040.1|//hypothetical protein Csa_4G624460 [Cucumis sativus];gi|449456691|ref|XP_004146082.1|//PREDICTED: probable leucine-rich repeat receptor-like serine/threonine-protein kinase At3g14840 [Cucumis sativus]
Csa1G005560	3571	9.17	43.80	2.25593723089348	3.59658e-167	2.77821532857143e-165	Up	NA	GO:0019203//carbohydrate phosphatase activity;GO:0003824//catalytic activity;GO:0035251//UDP-glucosyltransferase activity	GO:0005992//trehalose biosynthetic process;GO:0005991//trehalose metabolic process	K16055//trehalose 6-phosphate synthase/phosphatase [EC:2.4.1.15 3.1.3.12]	gi|449440688|ref|XP_004138116.1|//PREDICTED: probable alpha,alpha-trehalose-phosphate synthase [UDP-forming] 10 [Cucumis sativus]
Csa1G265630	447	2.13	10.16	2.25397506654633	2.80112e-05	9.1426227230047e-05	Up	NA	NA	NA	K03549//KUP system potassium uptake protein	gi|778665054|ref|XP_011648475.1|//PREDICTED: uncharacterized protein LOC105434480 [Cucumis sativus]
Csa1G528510	672	3.30	15.74	2.25389761126167	2.7745e-11	1.56048590002889e-10	Up	NA	NA	NA	NA	gi|700210690|gb|KGN65786.1|//hypothetical protein Csa_1G528510 [Cucumis sativus]
Csa5G599860	2291	7.60	36.18	2.25112108429029	6.34016e-80	2.09893800272109e-78	Up	GO:0016021//integral component of membrane;GO:0005886//plasma membrane	NA	GO:0055085//transmembrane transport;GO:0015706//nitrate transport	K02575//MFS transporter, NNP family, nitrate/nitrite transporter	gi|700196605|gb|KGN51782.1|//hypothetical protein Csa_5G599860 [Cucumis sativus];gi|821595461|ref|NP_001295862.1|//high affinity nitrate transporter 2.5 [Cucumis sativus]
Csa1G042520	1239	3.77	17.86	2.24409565185256	4.34572e-23	4.45934557301002e-22	Up	NA	NA	NA	K04733//interleukin-1 receptor-associated kinase 4 [EC:2.7.11.1]	gi|778657283|ref|XP_011650601.1|//PREDICTED: probable serine/threonine-protein kinase At1g18390 [Cucumis sativus]
Csa3G021130	1662	0.89	4.21	2.2419429921	2.66816e-08	1.1945354774609e-07	Up	NA	NA	NA	K15803//(-)-germacrene D synthase [EC:4.2.3.22 4.2.3.75]	gi|778675433|ref|XP_004147250.2|//PREDICTED: (-)-germacrene D synthase-like [Cucumis sativus]
Csa3G780540	759	5.42	25.46	2.23186766254749	1.706406e-19	1.48157445120428e-18	Up	NA	NA	NA	NA	gi|700204069|gb|KGN59202.1|//hypothetical protein Csa_3G780540 [Cucumis sativus]
Csa2G433340	2901	0.46	2.16	2.23132554610646	1.175934e-07	4.95363151785328e-07	Up	NA	NA	NA	K19613//leucine-rich repeat protein SHOC2;K15078//structure-specific endonuclease subunit SLX1 [EC:3.6.1.-]	gi|778673793|ref|XP_011650061.1|//PREDICTED: putative disease resistance protein RGA3 [Cucumis sativus]
Csa7G414480	789	1.95	9.11	2.22397693005244	4.42372e-08	1.9390257491556e-07	Up	NA	NA	NA	K09841//xanthoxin dehydrogenase [EC:1.1.1.288]	gi|449436375|ref|XP_004135968.1|//PREDICTED: short-chain dehydrogenase reductase 3b-like isoform X1 [Cucumis sativus]
Csa6G516960	1296	6.77	31.61	2.2231532963295	1.507918e-30	1.94778578553417e-29	Up	NA	NA	NA	NA	gi|449433892|ref|XP_004134730.1|//PREDICTED: F-box protein At4g05010 [Cucumis sativus]
Csa3G152090	309	3.30	15.38	2.22051757371601	4.65996e-05	0.000147713371372741	Up	NA	NA	NA	K03676//glutaredoxin 3	gi|449432817|ref|XP_004134195.1|//PREDICTED: monothiol glutaredoxin-S2 [Cucumis sativus]
Csa3G778180	342	5.01	23.32	2.21868528000529	7.31356e-08	3.14134507855252e-07	Up	NA	NA	NA	NA	gi|700204028|gb|KGN59161.1|//hypothetical protein Csa_3G778180 [Cucumis sativus]
Csa1G587990	3025	9.88	45.91	2.21622548512769	8.63674e-139	5.44086669385113e-137	Up	NA	GO:0030246//carbohydrate binding;GO:0004565//beta-galactosidase activity	GO:0005975//carbohydrate metabolic process	K12309//beta-galactosidase [EC:3.2.1.23]	gi|700211143|gb|KGN66239.1|//hypothetical protein Csa_1G587990 [Cucumis sativus];gi|449435860|ref|XP_004135712.1|//PREDICTED: beta-galactosidase-like [Cucumis sativus]
Csa7G033410	1191	53.83	248.13	2.20461384343307	1.254408e-280	1.83596286676692e-278	Up	NA	NA	NA	NA	gi|449453588|ref|XP_004144538.1|//PREDICTED: cytochrome b561 and DOMON domain-containing protein At5g35735-like [Cucumis sativus]
Csa4G001900	969	35.43	162.92	2.2011203488851	2.03878e-148	1.4023636565371e-146	Up	NA	GO:0003824//catalytic activity	NA	K08726//soluble epoxide hydrolase / lipid-phosphate phosphatase [EC:3.3.2.10 3.1.3.76]	gi|449469304|ref|XP_004152361.1|//PREDICTED: bifunctional epoxide hydrolase 2-like [Cucumis sativus]
Csa3G651750	3315	0.85	3.90	2.19793937761191	3.14352e-14	2.11224578253366e-13	Up	NA	NA	NA	K17422//large subunit ribosomal protein L41;K13420//LRR receptor-like serine/threonine-protein kinase FLS2 [EC:2.7.11.1]	gi|778682564|ref|XP_011651735.1|//PREDICTED: receptor-like protein kinase [Cucumis sativus]
Csa1G043200	621	22.76	104.42	2.19782560104135	2.74018e-59	6.61790866997519e-58	Up	NA	NA	NA	NA	gi|449439521|ref|XP_004137534.1|//PREDICTED: miraculin-like [Cucumis sativus]
Csa1G009580	1989	0.53	2.43	2.19689204904258	7.27642e-05	0.000224758476229768	Up	NA	GO:0043565//sequence-specific DNA binding;GO:0003700//transcription factor activity, sequence-specific DNA binding	GO:0006355//regulation of transcription, DNA-templated	K18835//WRKY transcription factor 2;K13424//WRKY transcription factor 33;K01892//histidyl-tRNA synthetase [EC:6.1.1.21];K18834//WRKY transcription factor 1	gi|778655906|ref|XP_011660002.1|//PREDICTED: probable WRKY transcription factor 61 isoform X2 [Cucumis sativus];gi|778655903|ref|XP_011659995.1|//PREDICTED: probable WRKY transcription factor 61 isoform X1 [Cucumis sativus]
Csa2G248130	921	6.46	29.59	2.1955036265	8.52376e-27	9.82959195260664e-26	Up	NA	NA	NA	K13081//leucoanthocyanidin reductase [EC:1.17.1.3]	gi|449462218|ref|XP_004148838.1|//PREDICTED: isoflavone reductase-like protein [Cucumis sativus]
Csa2G372780	714	1.99	9.07	2.18833411998487	3.22142e-07	1.29029139341564e-06	Up	NA	NA	NA	K14431//transcription factor TGA	gi|700207664|gb|KGN62783.1|//Transcription factor HBP-1b [Cucumis sativus]
Csa3G483770	843	8.01	36.49	2.18762700317577	1.034172e-29	1.30298978330097e-28	Up	NA	NA	NA	NA	gi|700202935|gb|KGN58068.1|//hypothetical protein Csa_3G483770 [Cucumis sativus]
Csa2G021510	3165	0.99	4.49	2.18121501466154	2.88054e-15	2.05018616599634e-14	Up	NA	NA	NA	K06758;K03283//heat shock 70kDa protein 1/8	gi|700205761|gb|KGN60880.1|//hypothetical protein Csa_2G021510 [Cucumis sativus]
Csa5G137420	396	22.10	100.18	2.18047624197911	4.52608e-34	6.44511143233358e-33	Up	NA	NA	NA	NA	gi|700194632|gb|KGN49809.1|//hypothetical protein Csa_5G137420 [Cucumis sativus]
Csa3G740790	573	1.29	5.84	2.17859730345676	0.00020794	0.000601360873570049	Up	NA	NA	NA	K09422//myb proto-oncogene protein, plant	gi|700203854|gb|KGN58987.1|//hypothetical protein Csa_3G740790 [Cucumis sativus]
Csa1G597800	2962	1.59	7.16	2.1709328219799	3.4593e-22	3.41128337386018e-21	Up	NA	GO:0016157//sucrose synthase activity;GO:0035251//UDP-glucosyltransferase activity	GO:0044403//symbiosis, encompassing mutualism through parasitism;GO:0005984//disaccharide metabolic process;GO:0005985//sucrose metabolic process	K00695//sucrose synthase [EC:2.4.1.13]	gi|700211237|gb|KGN66333.1|//hypothetical protein Csa_1G597800 [Cucumis sativus];gi|449452612|ref|XP_004144053.1|//PREDICTED: sucrose synthase [Cucumis sativus]
Csa5G495950	2002	18.74	84.34	2.17009606861995	6.62896e-161	4.9064386068441e-159	Up	GO:0044424//intracellular part;GO:0005737//cytoplasm	GO:0008135//translation factor activity, RNA binding;GO:0004779//sulfate adenylyltransferase activity;GO:0016779//nucleotidyltransferase activity;GO:0003746//translation elongation factor activity;GO:0003924//GTPase activity;GO:0032561//guanyl ribonucleotide binding;GO:0017111//nucleoside-triphosphatase activity;GO:0005525//GTP binding	GO:0006412//translation;GO:0006414//translational elongation;GO:0009207//purine ribonucleoside triphosphate catabolic process	K03231//elongation factor 1-alpha	gi|700196051|gb|KGN51228.1|//Elongation factor 1-alpha [Cucumis sativus];gi|778703141|ref|XP_011655322.1|//PREDICTED: elongation factor 1-alpha-like [Cucumis sativus]
Csa1G013250	2559	2.16	9.71	2.16843998325572	3.03178e-24	3.23911248518112e-23	Up	NA	NA	NA	K13447//respiratory burst oxidase [EC:1.6.3.- 1.11.1.-]	gi|778656081|ref|XP_011648418.1|//PREDICTED: respiratory burst oxidase homolog protein F-like isoform X1 [Cucumis sativus]
Csa7G067410	2037	1.20	5.38	2.16457176694811	6.83296e-12	4.00513096537188e-11	Up	NA	NA	NA	K04733//interleukin-1 receptor-associated kinase 4 [EC:2.7.11.1];K04730//interleukin-1 receptor-associated kinase 1 [EC:2.7.11.1]	gi|778724626|ref|XP_004137071.2|//PREDICTED: L-type lectin-domain containing receptor kinase IX.1-like [Cucumis sativus]
Csa3G119700	1014	16.26	72.88	2.16419570172702	3.29148e-69	9.39471402932551e-68	Up	NA	NA	NA	K13425//WRKY transcription factor 22;K16225//probable WRKY transcription factor 52	gi|778676947|ref|XP_011650695.1|//PREDICTED: probable WRKY transcription factor 46 [Cucumis sativus]
Csa3G859670	435	43.41	194.28	2.16203806377084	2.96772e-71	8.79294330593607e-70	Up	NA	NA	NA	NA	gi|449460255|ref|XP_004147861.1|//PREDICTED: uncharacterized protein LOC101222738 [Cucumis sativus]
Csa5G418770	1166	5.65	25.28	2.16167369087455	2.04742e-31	2.69655464952639e-30	Up	NA	NA	NA	NA	gi|700195865|gb|KGN51042.1|//hypothetical protein Csa_5G418770 [Cucumis sativus];gi|449445092|ref|XP_004140307.1|//PREDICTED: uncharacterized protein At1g66480-like [Cucumis sativus]
Csa2G415550	654	6.77	30.19	2.15684301793863	8.00734e-19	6.73890533679204e-18	Up	NA	NA	NA	K07904//Ras-related protein Rab-11A	gi|449468390|ref|XP_004151904.1|//PREDICTED: ras-related protein RABA1f-like [Cucumis sativus]
Csa7G041960	1434	3.62	16.01	2.14491170543305	8.51646e-23	8.62097817784712e-22	Up	NA	GO:0005506//iron ion binding	NA	K10528//hydroperoxide lyase [EC:4.1.2.-]	gi|700188269|gb|KGN43502.1|//13-hydroperoxide lyase [Cucumis sativus]
Csa2G032230	912	1.32	5.83	2.14295795384204	3.83296e-06	1.37483691468583e-05	Up	NA	NA	NA	K15747//beta-ring hydroxylase [EC:1.14.-.-];K16219//protein N-terminal methyltransferase [EC:2.1.1.244];K17600//vacuolar protein sorting-associated protein 54	gi|778666957|ref|XP_004144818.2|//PREDICTED: F-box protein PP2-B15-like [Cucumis sativus]
BGI_novel_G000346	2320	12.39	54.72	2.1428920427453	4.97284e-121	2.6740691558011e-119	Up	NA	NA	NA	K14794//ribosomal RNA-processing protein 12	gi|778706487|ref|XP_004142499.2|//PREDICTED: protein NUCLEAR FUSION DEFECTIVE 4-like [Cucumis sativus]
Csa6G421630	1276	22.57	99.64	2.142318603049	1.23222e-126	6.93248396531792e-125	Up	NA	GO:0043169//cation binding;GO:0046872//metal ion binding;GO:0009815//1-aminocyclopropane-1-carboxylate oxidase activity;GO:0016641//oxidoreductase activity, acting on the CH-NH2 group of donors, oxygen as acceptor;GO:0019842//vitamin binding;GO:0031418//L-ascorbic acid binding	GO:0009693//ethylene biosynthetic process;GO:0009835//fruit ripening;GO:0003006//developmental process involved in reproduction;GO:0009692//ethylene metabolic process;GO:0055114//oxidation-reduction process	K05933//aminocyclopropanecarboxylate oxidase [EC:1.14.17.4]	gi|700192765|gb|KGN47969.1|//hypothetical protein Csa_6G421630 [Cucumis sativus];gi|525507308|ref|NP_001267694.1|//1-aminocyclopropane-1-carboxylate oxidase 1-like [Cucumis sativus]
Csa1G065420	2367	2.91	12.81	2.13817941743336	1.575642e-30	2.03256773836978e-29	Up	NA	NA	NA	K04733//interleukin-1 receptor-associated kinase 4 [EC:2.7.11.1];K04730//interleukin-1 receptor-associated kinase 1 [EC:2.7.11.1]	gi|700209475|gb|KGN64571.1|//hypothetical protein Csa_1G065420 [Cucumis sativus];gi|778664884|ref|XP_011648428.1|//PREDICTED: uncharacterized protein LOC101218966 [Cucumis sativus]
Csa1G071890	1755	3.57	15.69	2.135849372939	3.5369e-27	4.12518246854404e-26	Up	NA	GO:0050136//NADH dehydrogenase (quinone) activity;GO:0046872//metal ion binding;GO:0050662//coenzyme binding	GO:0008152//metabolic process	K17871//NADH:ubiquinone reductase (non-electrogenic) [EC:1.6.5.9]	gi|449457690|ref|XP_004146581.1|//PREDICTED: external alternative NAD(P)H-ubiquinone oxidoreductase B2, mitochondrial [Cucumis sativus]
Csa4G665120	618	6.36	27.90	2.13316645143219	2.6615e-16	2.00111081498648e-15	Up	NA	NA	NA	NA	gi|778697315|ref|XP_011654294.1|//PREDICTED: uncharacterized protein LOC101220453 [Cucumis sativus]
Csa4G193250	993	2.03	8.89	2.13070369164459	2.40042e-09	1.17492018405834e-08	Up	NA	GO:0003676//nucleic acid binding	NA	K00162//pyruvate dehydrogenase E1 component beta subunit [EC:1.2.4.1];K13126//polyadenylate-binding protein;K05941//glutathione gamma-glutamylcysteinyltransferase [EC:2.3.2.15]	gi|449459638|ref|XP_004147553.1|//PREDICTED: NAC domain-containing protein 100-like [Cucumis sativus]
Csa1G587980	2815	32.06	140.38	2.13049107828428	0	0	Up	NA	NA	NA	K12309//beta-galactosidase [EC:3.2.1.23]	gi|778662941|ref|XP_011659980.1|//PREDICTED: beta-galactosidase-like [Cucumis sativus];gi|700211142|gb|KGN66238.1|//hypothetical protein Csa_1G587980 [Cucumis sativus]
Csa7G379080	3042	4.81	21.06	2.13039663725567	6.7035e-62	1.6990928515625e-60	Up	NA	NA	NA	K01537//Ca2+-transporting ATPase [EC:3.6.3.8]	gi|449458454|ref|XP_004146962.1|//PREDICTED: calcium-transporting ATPase 12, plasma membrane-type [Cucumis sativus]
Csa6G486960	925	40.28	176.35	2.13030598730683	4.31228e-142	2.81687390872483e-140	Up	NA	GO:0043565//sequence-specific DNA binding;GO:0003700//transcription factor activity, sequence-specific DNA binding	GO:0006355//regulation of transcription, DNA-templated	K18835//WRKY transcription factor 2;K13424//WRKY transcription factor 33	gi|449448420|ref|XP_004141964.1|//PREDICTED: probable WRKY transcription factor 51 [Cucumis sativus]
Csa6G516870	336	4.26	18.63	2.1287023387158	3.84404e-06	1.37830323521827e-05	Up	NA	NA	NA	NA	gi|700193975|gb|KGN49179.1|//hypothetical protein Csa_6G516870 [Cucumis sativus]
Csa4G335240	777	5.45	23.83	2.12845081652598	9.0756e-18	7.24633427399508e-17	Up	NA	GO:0016787//hydrolase activity	NA	K02866//large subunit ribosomal protein L10e;K11340//actin-like protein 6A	gi|778694036|ref|XP_004142728.2|//PREDICTED: acid phosphatase 1 [Cucumis sativus]
Csa2G418950	789	1.79	7.81	2.12536296087772	8.71204e-07	3.34956687023504e-06	Up	NA	NA	NA	K07976//Rab family, other	gi|449468350|ref|XP_004151884.1|//PREDICTED: septum-promoting GTP-binding protein 1 [Cucumis sativus]
Csa6G147660	870	5.11	22.25	2.1224101398035	1.322746e-18	1.09848863634812e-17	Up	GO:0030312//external encapsulating structure;GO:0005576//extracellular region	GO:0016758//transferase activity, transferring hexosyl groups;GO:0016798//hydrolase activity, acting on glycosyl bonds	GO:0044042//glucan metabolic process	K08235//xyloglucan:xyloglucosyl transferase [EC:2.4.1.207]	gi|700191669|gb|KGN46873.1|//hypothetical protein Csa_6G147660 [Cucumis sativus]
Csa5G162620	1529	2.13	9.27	2.12171590839969	3.14352e-14	2.11297514917127e-13	Up	NA	GO:0004033//aldo-keto reductase (NADP) activity;GO:0016491//oxidoreductase activity	GO:0008152//metabolic process;GO:0055114//oxidation-reduction process	K00010//myo-inositol 2-dehydrogenase / D-chiro-inositol 1-dehydrogenase [EC:1.1.1.18 1.1.1.369]	gi|449469377|ref|XP_004152397.1|//PREDICTED: uncharacterized protein LOC101203116 isoform X1 [Cucumis sativus]
Csa3G893360	1044	5.84	25.40	2.12078822277951	7.87824e-27	9.09595609964413e-26	Up	NA	NA	NA	NA	gi|778687638|ref|XP_004136245.2|//PREDICTED: phosphoglycerate mutase-like protein 1 [Cucumis sativus]
Csa4G008780	1941	1.32	5.74	2.12051280731723	4.1625e-12	2.47411374045802e-11	Up	GO:0044424//intracellular part	GO:0016840//carbon-nitrogen lyase activity	GO:0006558//L-phenylalanine metabolic process	K10775//phenylalanine ammonia-lyase [EC:4.3.1.24]	gi|778689757|ref|XP_011653013.1|//PREDICTED: phenylalanine ammonia-lyase-like [Cucumis sativus]
Csa6G427990	684	1.14	4.95	2.11839470080223	0.000350708	0.000978203457228829	Up	NA	NA	NA	NA	gi|778722330|ref|XP_011658464.1|//PREDICTED: uncharacterized protein LOC105436015 [Cucumis sativus]
Csa6G511780	1965	0.75	3.25	2.11547721741994	3.6422e-06	1.30882527598302e-05	Up	NA	NA	NA	NA	gi|449434012|ref|XP_004134790.1|//PREDICTED: uncharacterized protein LOC101205314 [Cucumis sativus];gi|700193858|gb|KGN49062.1|//hypothetical protein Csa_6G511780 [Cucumis sativus]
Csa3G308190	1329	5.13	22.19	2.11287893658996	3.2904e-28	3.97831840993789e-27	Up	NA	GO:0016874//ligase activity	NA	K01876//aspartyl-tRNA synthetase [EC:6.1.1.12];K08332//vacuolar protein 8	gi|449456206|ref|XP_004145841.1|//PREDICTED: U-box domain-containing protein 21 [Cucumis sativus]
Csa5G162050	1113	4.84	20.91	2.11111410931499	2.28484e-22	2.27153705005107e-21	Up	NA	NA	NA	K07999//matrix metalloproteinase-20 (enamelysin) [EC:3.4.24.-]	gi|778700092|ref|XP_011654810.1|//PREDICTED: metalloendoproteinase 1 [Cucumis sativus]
Csa4G022960	858	17.20	74.25	2.10998246098603	1.600548e-57	3.75376715277108e-56	Up	NA	NA	NA	K13989//Derlin-2/3	gi|449458345|ref|XP_004146908.1|//PREDICTED: derlin-1.1 isoform X1 [Cucumis sativus];gi|449458347|ref|XP_004146909.1|//PREDICTED: derlin-1.1 isoform X2 [Cucumis sativus]
Csa2G382650	1083	13.51	57.81	2.09729139769119	1.621278e-66	4.383305215e-65	Up	NA	GO:0003677//DNA binding;GO:0043565//sequence-specific DNA binding;GO:0003700//transcription factor activity, sequence-specific DNA binding;GO:0001071//nucleic acid binding transcription factor activity	GO:0010467//gene expression;GO:0006355//regulation of transcription, DNA-templated	K18835//WRKY transcription factor 2;K10268//F-box and leucine-rich repeat protein 2/20;K18834//WRKY transcription factor 1	gi|700207873|gb|KGN62992.1|//hypothetical protein Csa_2G382650 [Cucumis sativus];gi|525506965|ref|NP_001267528.1|//probable WRKY transcription factor 40-like [Cucumis sativus]
Csa2G425740	1509	3.27	13.87	2.08460524682552	2.82512e-20	2.56261816961789e-19	Up	NA	NA	NA	K00517;K13260//isoflavone 2'-hydroxylase [EC:1.14.13.89]	gi|778673620|ref|XP_011650030.1|//PREDICTED: cytochrome P450 81D1-like [Cucumis sativus]
Csa2G021000	651	6.60	27.94	2.08179409116365	1.019868e-16	7.80375412264151e-16	Up	NA	NA	NA	NA	gi|449442849|ref|XP_004139193.1|//PREDICTED: endogenous alpha-amylase/subtilisin inhibitor-like [Cucumis sativus]
Csa5G165850	753	1.54	6.51	2.07972719247073	1.703042e-05	5.68927674137635e-05	Up	NA	NA	NA	K09286//EREBP-like factor	gi|449469359|ref|XP_004152388.1|//PREDICTED: ethylene-responsive transcription factor 1A-like [Cucumis sativus]
Csa2G369210	1110	3.05	12.85	2.07488721163099	5.45824e-14	3.62257415069894e-13	Up	NA	NA	NA	K10664//E3 ubiquitin-protein ligase ATL6/9/15/31/42/55 [EC:2.3.2.27]	gi|449470088|ref|XP_004152750.1|//PREDICTED: RING-H2 finger protein ATL11-like [Cucumis sativus]
Csa7G073450	1443	43.70	182.84	2.06487653921607	2.80976e-233	3.14337862988506e-231	Up	NA	GO:0016758//transferase activity, transferring hexosyl groups	NA	K13496//UDP-glucosyl transferase 73C [EC:2.4.1.-]	gi|778725042|ref|XP_011658893.1|//PREDICTED: scopoletin glucosyltransferase-like [Cucumis sativus]
Csa3G121730	1410	1.91	7.97	2.06100708595472	1.84049e-11	1.05064452609971e-10	Up	NA	GO:0016757//transferase activity, transferring glycosyl groups	NA	K12937//cyanidin-3-O-glucoside 2''-O-glucuronosyltransferase [EC:2.4.1.254];K18823//soyasaponin III rhamnosyltransferase [EC:2.4.1.273]	gi|449433069|ref|XP_004134320.1|//PREDICTED: UDP-glycosyltransferase 91A1-like [Cucumis sativus]
Csa4G011730	1488	9.04	37.68	2.0594042871976	7.24942e-51	1.50927497026738e-49	Up	NA	NA	NA	K08150//MFS transporter, SP family, solute carrier family 2 (myo-inositol transporter), member 13	gi|449468830|ref|XP_004152124.1|//PREDICTED: inositol transporter 1 [Cucumis sativus]
Csa3G836500	1155	46.08	191.99	2.05881854673001	3.79832e-193	3.34561525429864e-191	Up	NA	GO:0016614//oxidoreductase activity, acting on CH-OH group of donors;GO:0016620//oxidoreductase activity, acting on the aldehyde or oxo group of donors, NAD or NADP as acceptor;GO:0000166//nucleotide binding	GO:0008152//metabolic process	K00122//formate dehydrogenase [EC:1.2.1.2]	gi|449446660|ref|XP_004141089.1|//PREDICTED: formate dehydrogenase, mitochondrial [Cucumis sativus]
Csa1G064820	2424	12.09	50.36	2.05846403846989	9.12976e-111	4.43191790922693e-109	Up	NA	GO:0016740//transferase activity	NA	K04733//interleukin-1 receptor-associated kinase 4 [EC:2.7.11.1];K04730//interleukin-1 receptor-associated kinase 1 [EC:2.7.11.1]	gi|449472233|ref|XP_004153532.1|//PREDICTED: cysteine-rich receptor-like protein kinase 10 [Cucumis sativus];gi|700209464|gb|KGN64560.1|//hypothetical protein Csa_1G064820 [Cucumis sativus]
Csa5G523160	906	2.66	11.07	2.05715707128036	5.51064e-10	2.82810752016873e-09	Up	NA	GO:0005515//protein binding	NA	K05337//ferredoxin;K09503//DnaJ homolog subfamily A member 2	gi|449450080|ref|XP_004142792.1|//PREDICTED: uncharacterized protein LOC101222804 [Cucumis sativus]
Csa4G621220	2078	28.98	120.53	2.05626277893293	1.265594e-225	1.33167852994595e-223	Up	NA	NA	NA	K07428//cytochrome P450, family 4, subfamily X [EC:1.14.14.1];K07426//cytochrome P450, family 4, subfamily B, polypeptide 1 [EC:1.14.14.1];K15638//cytochrome P450, family 72, subfamily C, polypeptide 1	gi|778695565|ref|XP_004146005.2|//PREDICTED: cytochrome P450 CYP72A219 isoform X1 [Cucumis sativus];gi|778695572|ref|XP_011654018.1|//PREDICTED: cytochrome P450 CYP72A219 isoform X3 [Cucumis sativus];gi|700199852|gb|KGN55010.1|//hypothetical protein Csa_4G621220 [Cucumis sativus];gi|778695569|ref|XP_011654017.1|//PREDICTED: cytochrome P450 CYP72A219 isoform X2 [Cucumis sativus]
Csa1G042630	1089	1.96	8.15	2.05594640500323	2.30894e-06	8.46915885434332e-06	Up	GO:0016021//integral component of membrane	NA	NA	K17553//protein phosphatase 1 regulatory subunit 11	gi|449439433|ref|XP_004137490.1|//PREDICTED: uncharacterized protein LOC101217102 [Cucumis sativus]
Csa1G701990	1515	39.29	162.95	2.05219527916724	2.55838e-187	2.18427302982456e-185	Up	NA	GO:0003824//catalytic activity	NA	K07393//putative glutathione S-transferase	gi|659118290|ref|XP_008459044.1|//PREDICTED: glutathione S-transferase omega-like 2 isoform X1 [Cucumis melo];gi|449455407|ref|XP_004145444.1|//PREDICTED: glutathione S-transferase omega-like 2 [Cucumis sativus]
Csa4G618510	1464	8.95	36.98	2.04678563725258	8.55456e-49	1.71850428235294e-47	Up	NA	NA	NA	K08237//hydroquinone glucosyltransferase [EC:2.4.1.218]	gi|778695494|ref|XP_004146062.2|//PREDICTED: anthocyanidin 3-O-glucosyltransferase 2-like [Cucumis sativus]
Csa3G134510	2088	2.00	8.25	2.04439411935845	1.012216e-16	7.74824878332678e-16	Up	NA	GO:0008168//methyltransferase activity	GO:0032259//methylation;GO:0016568//chromatin modification	K11420//euchromatic histone-lysine N-methyltransferase [EC:2.1.1.43]	gi|449432488|ref|XP_004134031.1|//PREDICTED: histone-lysine N-methyltransferase family member SUVH9 [Cucumis sativus]
Csa1G009600	2989	5.55	22.89	2.04415778631822	7.11716e-62	1.79925502025974e-60	Up	GO:0016021//integral component of membrane	GO:0005524//ATP binding;GO:0000166//nucleotide binding;GO:0017111//nucleoside-triphosphatase activity;GO:0005215//transporter activity;GO:0016887//ATPase activity	GO:0006810//transport	K05643//ATP-binding cassette, subfamily A (ABC1), member 3	gi|449440766|ref|XP_004138155.1|//PREDICTED: ABC transporter A family member 2 [Cucumis sativus]
Csa5G598080	1179	16.41	67.38	2.03774518960804	1.500074e-69	4.32599118281481e-68	Up	GO:0044464//cell part	GO:0008375//acetylglucosaminyltransferase activity	GO:0006486//protein glycosylation	K00737//beta-1,4-mannosyl-glycoprotein beta-1,4-N-acetylglucosaminyltransferase [EC:2.4.1.144]	gi|449434983|ref|XP_004135275.1|//PREDICTED: uncharacterized protein LOC101222690 [Cucumis sativus]
Csa5G652250	942	11.79	48.39	2.03714522089704	2.81016e-40	4.69953389690722e-39	Up	NA	NA	NA	K14638//solute carrier family 15 (peptide/histidine transporter), member 3/4	gi|700197542|gb|KGN52719.1|//hypothetical protein Csa_5G652250 [Cucumis sativus]
Csa6G212860	1938	36.80	150.38	2.03083503511886	2.88212e-255	3.66688548496732e-253	Up	NA	GO:0004674//protein serine/threonine kinase activity	NA	K08867//WNK lysine deficient protein kinase [EC:2.7.11.1]	gi|700192011|gb|KGN47215.1|//hypothetical protein Csa_6G212860 [Cucumis sativus]
Csa4G010410	1960	2.45	9.95	2.02191477642844	1.306506e-18	1.08546503610755e-17	Up	GO:0016021//integral component of membrane	NA	NA	NA	gi|778689815|ref|XP_011653021.1|//PREDICTED: uncharacterized protein LOC101222760 [Cucumis sativus]
Csa4G061840	5614	35.13	141.97	2.01481062112893	0	0	Up	NA	NA	NA	K10352//myosin heavy chain;K20283//golgin subfamily A member 4;K09291//nucleoprotein TPR	gi|700198339|gb|KGN53497.1|//hypothetical protein Csa_4G061840 [Cucumis sativus];gi|449460006|ref|XP_004147737.1|//PREDICTED: myosin-9 [Cucumis sativus]
Csa1G597710	2567	0.79	3.19	2.01363186558777	3.9186e-09	1.88112127250308e-08	Up	GO:0005618//cell wall;GO:0005773//vacuole	GO:0030246//carbohydrate binding;GO:0004565//beta-galactosidase activity;GO:0015925//galactosidase activity;GO:0043167//ion binding	GO:0044238//primary metabolic process;GO:0005975//carbohydrate metabolic process	K12309//beta-galactosidase [EC:3.2.1.23]	gi|778663194|ref|XP_011660030.1|//PREDICTED: beta-galactosidase 15 [Cucumis sativus];gi|659100149|ref|XP_008450952.1|//PREDICTED: LOW QUALITY PROTEIN: beta-galactosidase 15 [Cucumis melo]
BGI_novel_G000423	1977	14.35	57.81	2.01026833545383	4.65026e-100	2.03420137438202e-98	Up	GO:0005576//extracellular region	NA	NA	K13449//pathogenesis-related protein 1	gi|778724776|ref|XP_004136924.2|//PREDICTED: pathogenesis-related protein 1-like [Cucumis sativus]
Csa4G285740	957	123.02	494.15	2.00605615955718	0	0	Up	NA	GO:0016209//antioxidant activity;GO:0005506//iron ion binding;GO:0003824//catalytic activity	GO:0042743//hydrogen peroxide metabolic process;GO:0006950//response to stress	K00430//peroxidase [EC:1.11.1.7]	gi|449448792|ref|XP_004142149.1|//PREDICTED: peroxidase 2 [Cucumis sativus]
BGI_novel_G000565	344	7.46	29.89	2.00241536142286	9.86566e-09	4.58013206677796e-08	Up	NA	GO:0003676//nucleic acid binding	NA	K11593//eukaryotic translation initiation factor 2C	gi|659071857|ref|XP_008462248.1|//PREDICTED: protein argonaute 5 [Cucumis melo]
Csa3G078260	1191	2.30	9.21	2.00156729514696	1.235302e-10	6.63714842174993e-10	Up	GO:0031224//intrinsic component of membrane	NA	GO:0051234//establishment of localization	K15283//solute carrier family 35, member E1	gi|449470465|ref|XP_004152937.1|//PREDICTED: glucose-6-phosphate/phosphate translocator 1, chloroplastic [Cucumis sativus]
Csa3G198490	1757	3.83	15.32	2	1.05493e-25	1.18290710714286e-24	Up	NA	NA	NA	K14487//auxin responsive GH3 gene family	gi|449445927|ref|XP_004140723.1|//PREDICTED: probable indole-3-acetic acid-amido synthetase GH3.1 [Cucumis sativus]
Csa1G024230	1598	2.04	8.15	1.99823090714694	3.6194e-13	2.30245883660131e-12	Up	NA	NA	NA	K04733//interleukin-1 receptor-associated kinase 4 [EC:2.7.11.1];K04447//Janus kinase 2 [EC:2.7.10.2]	gi|778656380|ref|XP_011648955.1|//PREDICTED: probable serine/threonine-protein kinase At1g18390 [Cucumis sativus];gi|700208742|gb|KGN63838.1|//hypothetical protein Csa_1G024230 [Cucumis sativus]
Csa7G343330	1937	1.46	5.83	1.99752751432048	1.80018e-11	1.02914255154185e-10	Up	GO:0016020//membrane;GO:0016021//integral component of membrane	NA	GO:0071705//nitrogen compound transport	NA	gi|778726990|ref|XP_011659193.1|//PREDICTED: ureide permease 1-like isoform X2 [Cucumis sativus];gi|778726987|ref|XP_011659192.1|//PREDICTED: ureide permease 1-like isoform X1 [Cucumis sativus]
Csa5G168890	984	1.15	4.59	1.99686029246943	7.27642e-05	0.000224794146516426	Up	NA	GO:0016740//transferase activity	NA	K13420//LRR receptor-like serine/threonine-protein kinase FLS2 [EC:2.7.11.1]	gi|700195175|gb|KGN50352.1|//hypothetical protein Csa_5G168890 [Cucumis sativus]
Csa4G618490	1104	40.16	160.02	1.99442105632131	1.393454e-147	9.55104773380281e-146	Up	NA	NA	NA	K14709//solute carrier family 39 (zinc transporter), member 1/2/3	gi|778695487|ref|XP_011654004.1|//PREDICTED: zinc transporter 8 [Cucumis sativus]
Csa6G147620	804	39.45	156.71	1.99000003885026	7.71762e-103	3.42993586575342e-101	Up	NA	NA	NA	K10752//histone-binding protein RBBP4;K07213//copper chaperone	gi|449456040|ref|XP_004145758.1|//PREDICTED: uncharacterized protein LOC101219496 [Cucumis sativus]
Csa6G213910	978	3.22	12.78	1.98875524283238	1.067736e-11	6.18771925454004e-11	Up	NA	NA	NA	K00430//peroxidase [EC:1.11.1.7]	gi|449465781|ref|XP_004150606.1|//PREDICTED: peroxidase P7-like [Cucumis sativus]
Csa4G290170	1809	2.72	10.78	1.98667862150217	5.27302e-18	4.26796704033264e-17	Up	NA	NA	NA	K04733//interleukin-1 receptor-associated kinase 4 [EC:2.7.11.1];K00276//primary-amine oxidase [EC:1.4.3.21]	gi|700198992|gb|KGN54150.1|//hypothetical protein Csa_4G290170 [Cucumis sativus]
Csa7G284420	2850	3.78	14.98	1.98657948423768	3.01552e-38	4.76075525709651e-37	Up	NA	NA	NA	K00924;K08286//protein-serine/threonine kinase [EC:2.7.11.-];K17422//large subunit ribosomal protein L41	gi|778726374|ref|XP_004150401.2|//PREDICTED: leucine-rich repeat receptor-like tyrosine-protein kinase At2g41820 [Cucumis sativus]
Csa3G146290	1092	2.18	8.61	1.98168510261992	3.70674e-09	1.78381707886279e-08	Up	NA	NA	NA	K09419//heat shock transcription factor, other eukaryote	gi|449433295|ref|XP_004134433.1|//PREDICTED: heat stress transcription factor A-6b [Cucumis sativus]
Csa1G658010	603	3.05	12.04	1.98095424430945	5.03258e-07	1.97907479353535e-06	Up	NA	GO:0004721//phosphoprotein phosphatase activity	GO:0006796//phosphate-containing compound metabolic process	K18045//tyrosine-protein phosphatase SIW14 [EC:3.1.3.48]	gi|449442673|ref|XP_004139105.1|//PREDICTED: probable tyrosine-protein phosphatase At1g05000 [Cucumis sativus]
Csa6G190390	1810	80.29	316.88	1.98064438783119	0	0	Up	NA	GO:0004674//protein serine/threonine kinase activity;GO:0005524//ATP binding	GO:0006468//protein phosphorylation	K04733//interleukin-1 receptor-associated kinase 4 [EC:2.7.11.1]	gi|449450734|ref|XP_004143117.1|//PREDICTED: protein kinase APK1A, chloroplastic [Cucumis sativus]
Csa6G109750	1404	18.51	73.05	1.98057937782029	7.04106e-87	2.57633973609022e-85	Up	NA	NA	NA	K12338//anthocyanidin 3-O-glucoside 5-O-glucosyltransferase [EC:2.4.1.298]	gi|449445445|ref|XP_004140483.1|//PREDICTED: crocetin glucosyltransferase, chloroplastic-like [Cucumis sativus]
Csa1G059750	507	8.98	35.42	1.97977686201077	4.42346e-15	3.11982146231884e-14	Up	NA	NA	NA	NA	gi|700209400|gb|KGN64496.1|//p55 [Cucumis sativus]
Csa7G343850	1746	12.72	50.12	1.9782877440375	4.74736e-75	1.47153041019108e-73	Up	NA	GO:0016787//hydrolase activity	NA	K01051//pectinesterase [EC:3.1.1.11]	gi|778726997|ref|XP_011659194.1|//PREDICTED: pectinesterase [Cucumis sativus]
BGI_novel_G000108	1772	10.12	39.84	1.97700835737377	6.31202e-61	1.57122482506394e-59	Up	NA	NA	NA	K01673//carbonic anhydrase [EC:4.2.1.1]	gi|449469779|ref|XP_004152596.1|//PREDICTED: beta carbonic anhydrase 5, chloroplastic-like isoform X2 [Cucumis sativus]
Csa2G010420	2388	14.69	57.73	1.9744868294515	3.75152e-88	1.40167156084453e-86	Up	NA	NA	NA	K00128//aldehyde dehydrogenase (NAD+) [EC:1.2.1.3]	gi|778666508|ref|XP_011648753.1|//PREDICTED: aldehyde dehydrogenase family 2 member B7, mitochondrial-like isoform X2 [Cucumis sativus]
Csa7G450770	1747	11.85	46.55	1.97389410866053	2.98166e-69	8.53544022941176e-68	Up	NA	GO:0004553//hydrolase activity, hydrolyzing O-glycosyl compounds	GO:0005975//carbohydrate metabolic process	K01193//beta-fructofuranosidase [EC:3.2.1.26]	gi|778729799|ref|XP_004141685.2|//PREDICTED: beta-fructofuranosidase, insoluble isoenzyme CWINV1-like [Cucumis sativus]
Csa3G852620	1629	1.25	4.90	1.97085365434048	1.036398e-08	4.79774636575505e-08	Up	GO:0016021//integral component of membrane	GO:0016705//oxidoreductase activity, acting on paired donors, with incorporation or reduction of molecular oxygen;GO:0020037//heme binding;GO:0005506//iron ion binding;GO:0004497//monooxygenase activity	GO:0055114//oxidation-reduction process	K00517	gi|449460141|ref|XP_004147804.1|//PREDICTED: cytochrome P450 CYP82D47-like [Cucumis sativus]
Csa2G234570	1047	5.40	21.12	1.96757852230762	1.724194e-19	1.49568450998217e-18	Up	NA	NA	NA	NA	gi|449472539|ref|XP_004153625.1|//PREDICTED: uncharacterized protein LOC101210068 [Cucumis sativus]
Csa6G358680	1135	36.77	143.66	1.96605733898043	1.820402e-133	1.09033677944615e-131	Up	NA	GO:0016799//hydrolase activity, hydrolyzing N-glycosyl compounds	GO:0009691//cytokinin biosynthetic process	K06966//uncharacterized protein	gi|700192351|gb|KGN47555.1|//hypothetical protein Csa_6G358680 [Cucumis sativus];gi|449453077|ref|XP_004144285.1|//PREDICTED: cytokinin riboside 5'-monophosphate phosphoribohydrolase LOG1-like [Cucumis sativus]
Csa5G606310	873	44.12	172.20	1.96458044669282	3.28584e-121	1.77180502603878e-119	Up	NA	NA	NA	K02437//glycine cleavage system H protein;K13126//polyadenylate-binding protein;K00162//pyruvate dehydrogenase E1 component beta subunit [EC:1.2.4.1];K05941//glutathione gamma-glutamylcysteinyltransferase [EC:2.3.2.15]	gi|449434768|ref|XP_004135168.1|//PREDICTED: NAC transcription factor 29-like [Cucumis sativus]
Csa4G625570	2017	0.79	3.08	1.9630057925178	1.35202e-06	5.08765152136091e-06	Up	GO:0044464//cell part;GO:0016021//integral component of membrane	GO:0008320//protein transmembrane transporter activity	GO:0006810//transport;GO:0015031//protein transport	K10956//protein transport protein SEC61 subunit alpha	gi|449456565|ref|XP_004146019.1|//PREDICTED: protein transport protein Sec61 subunit alpha [Cucumis sativus]
Csa7G447990	1788	107.00	415.92	1.95869526370545	0	0	Up	GO:0030312//external encapsulating structure	GO:0030234//enzyme regulator activity	GO:0045229//external encapsulating structure organization;GO:0071555//cell wall organization	K01051//pectinesterase [EC:3.1.1.11]	gi|449447960|ref|XP_004141734.1|//PREDICTED: pectinesterase-like [Cucumis sativus]
Csa6G517370	1917	0.77	2.99	1.9572151335032	3.6422e-06	1.30906693500739e-05	Up	NA	NA	NA	K17964//leucine-rich PPR motif-containing protein, mitochondrial;K03452//magnesium/proton exchanger;K10683//BRCA1-associated RING domain protein 1;K11000//callose synthase [EC:2.4.1.-]	gi|700194025|gb|KGN49229.1|//hypothetical protein Csa_6G517370 [Cucumis sativus]
BGI_novel_G000008	3015	9.55	37.03	1.95512191124852	1.793624e-95	7.39717897966102e-94	Up	GO:0016021//integral component of membrane	GO:0005216//ion channel activity	GO:0034220//ion transmembrane transport	K05391//cyclic nucleotide gated channel, other eukaryote	gi|778656729|ref|XP_011649574.1|//PREDICTED: probable cyclic nucleotide-gated ion channel 20, chloroplastic [Cucumis sativus]
Csa3G135080	1980	6.76	26.16	1.9522673892159	3.05246e-43	5.46634649126035e-42	Up	GO:0031224//intrinsic component of membrane;GO:0005887//integral component of plasma membrane	GO:0015291//secondary active transmembrane transporter activity;GO:0005315//inorganic phosphate transmembrane transporter activity;GO:0022891//substrate-specific transmembrane transporter activity	GO:0055085//transmembrane transport;GO:0006817//phosphate ion transport;GO:0015698//inorganic anion transport	K08176//MFS transporter, PHS family, inorganic phosphate transporter	gi|449432556|ref|XP_004134065.1|//PREDICTED: inorganic phosphate transporter 1-4 [Cucumis sativus]
Csa3G164500	882	8.93	34.47	1.94860921824605	1.381938e-25	1.54247735711009e-24	Up	NA	NA	GO:0050896//response to stimulus	K19041//E3 ubiquitin-protein ligase RNF38/44 [EC:2.3.2.27];K10664//E3 ubiquitin-protein ligase ATL6/9/15/31/42/55 [EC:2.3.2.27]	gi|449432878|ref|XP_004134225.1|//PREDICTED: RING-H2 finger protein ATL2 [Cucumis sativus]
Csa6G237600	1245	15.80	60.92	1.94699138342283	6.79528e-63	1.74969471534392e-61	Up	NA	NA	NA	NA	gi|449466574|ref|XP_004151001.1|//PREDICTED: basic 7S globulin-like [Cucumis sativus]
Csa1G586250	948	1.73	6.67	1.94691472354786	2.16792e-06	7.9729323105989e-06	Up	NA	GO:0016209//antioxidant activity;GO:0005506//iron ion binding;GO:0003824//catalytic activity	GO:0008152//metabolic process;GO:0006950//response to stress	K00430//peroxidase [EC:1.11.1.7]	gi|449435824|ref|XP_004135694.1|//PREDICTED: peroxidase P7 [Cucumis sativus]
Csa5G146930	243	5.10	19.64	1.94522577745584	0.000320728	0.000900907827994228	Up	NA	NA	NA	NA	gi|778699182|ref|XP_011654674.1|//PREDICTED: uncharacterized protein LOC105435432 [Cucumis sativus]
Csa1G287020	813	91.95	353.90	1.94442028201329	1.341532e-225	1.40399257591398e-223	Up	NA	NA	NA	K17345//tetraspanin-5	gi|449466889|ref|XP_004151158.1|//PREDICTED: tetraspanin-8-like [Cucumis sativus]
Csa5G146870	1044	6.86	26.36	1.94206988883524	1.685934e-23	1.75875622958199e-22	Up	NA	GO:0016706//oxidoreductase activity, acting on paired donors, with incorporation or reduction of molecular oxygen, 2-oxoglutarate as one donor, and incorporation of one atom each of oxygen into both donors;GO:0046914//transition metal ion binding	GO:0008152//metabolic process	K05278//flavonol synthase [EC:1.14.11.23];K00475//naringenin 3-dioxygenase [EC:1.14.11.9];K06892//feruloyl-CoA ortho-hydroxylase [EC:1.14.11.-]	gi|449456281|ref|XP_004145878.1|//PREDICTED: naringenin,2-oxoglutarate 3-dioxygenase-like [Cucumis sativus]
Csa7G064010	1173	9.47	36.37	1.94131259498723	7.85666e-36	1.17014340902831e-34	Up	NA	GO:0016703//oxidoreductase activity, acting on single donors with incorporation of molecular oxygen, incorporation of one atom of oxygen (internal monooxygenases or internal mixed function oxidases)	GO:0008152//metabolic process;GO:0009608//response to symbiont;GO:0010038//response to metal ion	NA	gi|778724449|ref|XP_011658807.1|//PREDICTED: nitronate monooxygenase isoform X1 [Cucumis sativus]
Csa3G119240	693	49.52	189.81	1.93847278202174	4.5164e-102	1.99356558730159e-100	Up	NA	GO:0003677//DNA binding	GO:0006351//transcription, DNA-templated	K09338//homeobox-leucine zipper protein	gi|449432008|ref|XP_004133792.1|//PREDICTED: homeobox-leucine zipper protein ATHB-12 [Cucumis sativus]
Csa2G348960	1497	7.73	29.41	1.92776646496222	2.69884e-37	4.15958982106097e-36	Up	NA	NA	NA	K04733//interleukin-1 receptor-associated kinase 4 [EC:2.7.11.1]	gi|700207191|gb|KGN62310.1|//hypothetical protein Csa_2G348960 [Cucumis sativus]
CsaUNG013090	2477	5.15	19.59	1.92747306019701	3.5009e-39	5.65547878838174e-38	Up	GO:0005618//cell wall	GO:0004252//serine-type endopeptidase activity	NA	K09490//heat shock 70kDa protein 5;K13199//plasminogen activator inhibitor 1 RNA-binding protein;K11267//sister chromatid cohesion protein PDS5;K12663//Delta(3,5)-Delta(2,4)-dienoyl-CoA isomerase [EC:5.3.3.-];K18443//golgi-specific brefeldin A-resistance guanine nucleotide exchange factor 1;K01183//chitinase [EC:3.2.1.14]	gi|778730654|ref|XP_004140477.2|//PREDICTED: subtilisin-like protease SBT1.1 [Cucumis sativus]
Csa3G018320	1035	6.68	25.39	1.92634038717345	2.89272e-22	2.86709203258656e-21	Up	NA	NA	NA	K09286//EREBP-like factor	gi|449458980|ref|XP_004147224.1|//PREDICTED: ethylene-responsive transcription factor 6 [Cucumis sativus]
Csa3G643770	909	30.82	117.12	1.92604869176926	1.939214e-84	6.83853980507246e-83	Up	NA	GO:0016709//oxidoreductase activity, acting on paired donors, with incorporation or reduction of molecular oxygen, NAD(P)H as one donor, and incorporation of one atom of oxygen;GO:0005506//iron ion binding	GO:0008152//metabolic process	K05280//flavonoid 3'-monooxygenase [EC:1.14.13.21]	gi|778688725|ref|XP_004144428.2|//PREDICTED: cytochrome P450 71A1-like, partial [Cucumis sativus]
Csa3G825090	2063	47.18	178.80	1.92209941283122	1.343286e-300	2.179033773e-298	Up	NA	NA	NA	K07428//cytochrome P450, family 4, subfamily X [EC:1.14.14.1];K07426//cytochrome P450, family 4, subfamily B, polypeptide 1 [EC:1.14.14.1];K07424;K17873//11-oxo-beta-amyrin 30-oxidase [EC:1.14.13.173]	gi|700204431|gb|KGN59564.1|//hypothetical protein Csa_3G825090 [Cucumis sativus];gi|778685551|ref|XP_004151308.2|//PREDICTED: cytochrome P450 CYP72A219 [Cucumis sativus]
Csa3G598910	474	3.42	12.95	1.92088386768802	9.33574e-06	3.21816034779529e-05	Up	NA	NA	NA	NA	gi|778681823|ref|XP_004145699.2|//PREDICTED: light-regulated protein [Cucumis sativus]
Csa7G133920	867	6.07	22.93	1.91746793332511	9.9086e-14	6.4964906567868e-13	Up	NA	NA	NA	NA	gi|700188813|gb|KGN44046.1|//hypothetical protein Csa_7G133920 [Cucumis sativus]
Csa1G614640	738	28.62	107.82	1.91352923750443	8.29836e-62	2.09514754552529e-60	Up	NA	NA	NA	NA	gi|700211398|gb|KGN66494.1|//hypothetical protein Csa_1G614640 [Cucumis sativus]
Csa4G358710	2274	1.04	3.90	1.90689059560852	9.4735e-09	4.40227144903318e-08	Up	NA	NA	NA	K17964//leucine-rich PPR motif-containing protein, mitochondrial	gi|449449910|ref|XP_004142707.1|//PREDICTED: pentatricopeptide repeat-containing protein At1g02060, chloroplastic [Cucumis sativus]
Csa5G492350	1555	17.44	65.28	1.90424101719457	4.98932e-72	1.49879788765432e-70	Up	GO:0016021//integral component of membrane	NA	NA	NA	gi|449452110|ref|XP_004143803.1|//PREDICTED: uncharacterized protein LOC101212152 [Cucumis sativus]
Csa1G569360	297	10.40	38.91	1.9035574519444	8.50808e-09	3.9707093090386e-08	Up	GO:0016020//membrane	NA	NA	NA	gi|449435647|ref|XP_004135606.1|//PREDICTED: uncharacterized protein LOC101204590 [Cucumis sativus]
Csa7G044840	768	10.53	39.38	1.90295767487584	2.06766e-24	2.2200258996139e-23	Up	NA	NA	NA	K04733//interleukin-1 receptor-associated kinase 4 [EC:2.7.11.1];K04730//interleukin-1 receptor-associated kinase 1 [EC:2.7.11.1]	gi|449453478|ref|XP_004144484.1|//PREDICTED: cysteine-rich repeat secretory protein 38-like [Cucumis sativus]
Csa3G017320	840	18.82	70.23	1.89982080710463	2.0937e-46	3.99176926542605e-45	Up	NA	NA	NA	K09286//EREBP-like factor	gi|449458984|ref|XP_004147226.1|//PREDICTED: ethylene-responsive transcription factor 2 [Cucumis sativus]
Csa6G190300	2155	8.73	32.57	1.89949016076646	4.88752e-58	1.15461728543689e-56	Up	NA	NA	NA	K14494//DELLA protein	gi|449450910|ref|XP_004143205.1|//PREDICTED: scarecrow-like protein 34 [Cucumis sativus]
BGI_novel_G000492	831	27.79	103.66	1.89922155918414	7.00158e-67	1.91691640337553e-65	Up	NA	NA	NA	K11593//eukaryotic translation initiation factor 2C	gi|659071857|ref|XP_008462248.1|//PREDICTED: protein argonaute 5 [Cucumis melo]
Csa7G318990	723	127.40	474.94	1.89837998917575	3.21704e-257	4.11992767368421e-255	Up	NA	NA	NA	NA	gi|449443818|ref|XP_004139673.1|//PREDICTED: pathogen-related protein [Cucumis sativus]
Csa1G586810	1026	3.19	11.89	1.89812038598079	6.56188e-11	3.59711506843143e-10	Up	GO:0031224//intrinsic component of membrane;GO:0019866//organelle inner membrane	NA	GO:0006810//transport	K15084//solute carrier family 25 (mitochondrial carrier protein), member 16	gi|449435838|ref|XP_004135701.1|//PREDICTED: graves disease carrier protein homolog isoform X1 [Cucumis sativus]
Csa2G416190	2415	12.29	45.79	1.89754764930089	1.180294e-88	4.44402379187621e-87	Up	GO:0016021//integral component of membrane	GO:0016760//cellulose synthase (UDP-forming) activity;GO:0016740//transferase activity	GO:0030244//cellulose biosynthetic process;GO:0071555//cell wall organization	K10999//cellulose synthase A [EC:2.4.1.12]	gi|778673434|ref|XP_004151939.2|//PREDICTED: cellulose synthase-like protein H1 isoform X1 [Cucumis sativus]
Csa6G356990	2231	1147.81	4274.89	1.89700344886048	0	0	Up	GO:0042579//microbody	GO:0020037//heme binding;GO:0046872//metal ion binding;GO:0004096//catalase activity;GO:0004601//peroxidase activity;GO:0005506//iron ion binding	GO:0006979//response to oxidative stress;GO:0042743//hydrogen peroxide metabolic process;GO:0098869//cellular oxidant detoxification;GO:0006950//response to stress;GO:0042744//hydrogen peroxide catabolic process;GO:0055114//oxidation-reduction process	K03781//catalase [EC:1.11.1.6]	gi|700192329|gb|KGN47533.1|//Catalase isozyme 3 [Cucumis sativus]
Csa6G227020	1116	71.90	267.62	1.89612226091451	3.71016e-232	4.08033754576271e-230	Up	NA	NA	NA	NA	gi|449463298|ref|XP_004149371.1|//PREDICTED: protein trichome birefringence-like 39 [Cucumis sativus]
Csa7G232490	1095	2.99	11.10	1.89234228703936	6.56188e-11	3.59610236711712e-10	Up	GO:0044464//cell part	GO:0046914//transition metal ion binding	NA	K01191//alpha-mannosidase [EC:3.2.1.24]	gi|449444094|ref|XP_004139810.1|//PREDICTED: uncharacterized protein LOC101208946 [Cucumis sativus]
Csa2G369200	924	3.29	12.21	1.89190371125216	4.58246e-10	2.3642238632388e-09	Up	NA	NA	NA	K18485//myogenic factor 6;K13422//transcription factor MYC2	gi|449469829|ref|XP_004152621.1|//PREDICTED: transcription factor bHLH96 [Cucumis sativus]
Csa2G237750	2694	9.68	35.91	1.89130670039006	3.43682e-79	1.12438887596639e-77	Up	NA	NA	NA	K04640//guanine nucleotide-binding protein subunit alpha, other	gi|449470614|ref|XP_004153011.1|//PREDICTED: extra-large guanine nucleotide-binding protein 1-like isoform X2 [Cucumis sativus]
Csa7G014520	1389	7.21	26.70	1.88876857733409	2.25958e-24	2.42208063215859e-23	Up	GO:0016021//integral component of membrane	GO:0016491//oxidoreductase activity;GO:0071949//FAD binding	GO:0055114//oxidation-reduction process	K00480//salicylate hydroxylase [EC:1.14.13.1];K09838//zeaxanthin epoxidase [EC:1.14.13.90]	gi|778723030|ref|XP_004144922.2|//PREDICTED: zeaxanthin epoxidase, chloroplastic-like [Cucumis sativus]
Csa1G006320	1827	13.35	49.16	1.88064517379775	3.55636e-72	1.07164247306502e-70	Up	NA	NA	NA	K18875//enhanced disease susceptibility 1 protein	gi|449440726|ref|XP_004138135.1|//PREDICTED: protein EDS1L [Cucumis sativus]
Csa7G049170	897	8.63	31.72	1.87796030652502	5.48344e-23	5.59437332494759e-22	Up	NA	GO:0003677//DNA binding;GO:0001071//nucleic acid binding transcription factor activity	GO:0010467//gene expression	K13425//WRKY transcription factor 22	gi|525507180|ref|NP_001267628.1|//probable WRKY transcription factor 69-like [Cucumis sativus]
Csa5G206420	1467	3.02	11.09	1.87663891083663	2.02456e-17	1.59361443429034e-16	Up	NA	GO:0005506//iron ion binding;GO:0051213//dioxygenase activity	GO:0055114//oxidation-reduction process	K05278//flavonol synthase [EC:1.14.11.23];K05933//aminocyclopropanecarboxylate oxidase [EC:1.14.17.4];K05277//leucoanthocyanidin dioxygenase [EC:1.14.11.19]	gi|778701287|ref|XP_004150750.2|//PREDICTED: leucoanthocyanidin dioxygenase-like [Cucumis sativus]
Csa6G520340	831	6.29	23.07	1.87488608180369	8.02992e-16	5.89628150584685e-15	Up	GO:0031224//intrinsic component of membrane	NA	GO:0006810//transport	K09874//aquaporin NIP	gi|778721195|ref|XP_004134594.2|//PREDICTED: aquaporin NIP1-1 [Cucumis sativus]
Csa2G033350	2170	15.03	55.05	1.87289755453537	1.95221e-95	8.03419024524313e-94	Up	NA	NA	NA	NA	gi|778666992|ref|XP_011648851.1|//PREDICTED: uncharacterized protein LOC101207106 isoform X2 [Cucumis sativus];gi|778666989|ref|XP_011648850.1|//PREDICTED: uncharacterized protein LOC101207106 isoform X1 [Cucumis sativus];gi|700205861|gb|KGN60980.1|//hypothetical protein Csa_2G033350 [Cucumis sativus]
Csa4G627770	3009	1.39	5.09	1.87258077335219	7.07486e-14	4.66844829694915e-13	Up	NA	NA	NA	NA	gi|700199920|gb|KGN55078.1|//hypothetical protein Csa_4G627770 [Cucumis sativus]
Csa6G384060	1677	3.30	12.06	1.86969197765427	2.68782e-17	2.10717294079742e-16	Up	NA	GO:0016811//hydrolase activity, acting on carbon-nitrogen (but not peptide) bonds, in linear amides	NA	K14664//IAA-amino acid hydrolase [EC:3.5.1.-]	gi|700192516|gb|KGN47720.1|//hypothetical protein Csa_6G384060 [Cucumis sativus]
Csa4G646190	651	71.23	260.28	1.86950756344374	8.28796e-124	4.57035210651558e-122	Up	NA	NA	NA	K06966//uncharacterized protein	gi|449447134|ref|XP_004141324.1|//PREDICTED: cytokinin riboside 5'-monophosphate phosphoribohydrolase LOG8 [Cucumis sativus]
Csa3G779010	666	10.73	39.20	1.86920357824605	1.729398e-20	1.5834647915334e-19	Up	NA	NA	NA	K08488//syntaxin 7	gi|449437456|ref|XP_004136508.1|//PREDICTED: protein YLS9 [Cucumis sativus]
Csa4G303170	675	4.23	15.45	1.86887726967179	5.0649e-09	2.4094169941349e-08	Up	NA	NA	NA	K00799//glutathione S-transferase [EC:2.5.1.18]	gi|449460359|ref|XP_004147913.1|//PREDICTED: glutathione S-transferase U8-like [Cucumis sativus]
Csa4G638480	2466	25.82	94.19	1.86708489872348	7.88042e-184	6.61207998793103e-182	Up	NA	GO:0000166//nucleotide binding	NA	K13459//disease resistance protein RPS2;K19613//leucine-rich repeat protein SHOC2	gi|449446965|ref|XP_004141240.1|//PREDICTED: probable disease resistance protein At4g33300 [Cucumis sativus]
Csa5G627090	1303	187.04	681.60	1.86557850058154	0	0	Up	NA	GO:0046872//metal ion binding;GO:0016491//oxidoreductase activity	GO:0055114//oxidation-reduction process	K06892//feruloyl-CoA ortho-hydroxylase [EC:1.14.11.-];K13229//2,4-dihydroxy-1,4-benzoxazin-3-one-glucoside dioxygenase [EC:1.14.20.2]	gi|449449240|ref|XP_004142373.1|//PREDICTED: 1-aminocyclopropane-1-carboxylate oxidase homolog 6-like isoform X1 [Cucumis sativus]
Csa1G403660	2127	0.80	2.91	1.86294724802092	3.25306e-06	1.17637127921234e-05	Up	NA	NA	NA	K12662//U4/U6 small nuclear ribonucleoprotein PRP4;K14963//COMPASS component SWD3	gi|700210294|gb|KGN65390.1|//hypothetical protein Csa_1G403660 [Cucumis sativus]
Csa7G432520	1314	112.33	407.77	1.86001235879807	0	0	Up	NA	NA	NA	NA	gi|449436136|ref|XP_004135850.1|//PREDICTED: early nodulin-like protein 2 [Cucumis sativus]
Csa1G025150	522	2.56	9.27	1.85642552862553	0.0001090246	0.000328830626526185	Up	GO:0016020//membrane;GO:0043231//intracellular membrane-bounded organelle;GO:0015934//large ribosomal subunit	GO:0005198//structural molecule activity	GO:0022613//ribonucleoprotein complex biogenesis;GO:0010467//gene expression	K02885//large subunit ribosomal protein L19e	gi|449439153|ref|XP_004137352.1|//PREDICTED: 60S ribosomal protein L19-3-like [Cucumis sativus]
Csa1G068570	1725	1.00	3.62	1.85598969730848	3.25306e-06	1.17658985432925e-05	Up	NA	NA	NA	K15086//(3S)-linalool synthase [EC:4.2.3.25]	gi|700209493|gb|KGN64589.1|//hypothetical protein Csa_1G068570 [Cucumis sativus]
Csa5G593440	2170	22.36	80.91	1.85539783411357	1.14184e-178	9.37850524894514e-177	Up	GO:0016020//membrane	GO:0046872//metal ion binding;GO:0016491//oxidoreductase activity	NA	K00517;K00512//steroid 17alpha-monooxygenase / 17alpha-hydroxyprogesterone aldolase [EC:1.14.14.19 4.1.2.30]	gi|700196554|gb|KGN51731.1|//Cytochrome P450 [Cucumis sativus];gi|449435432|ref|XP_004135499.1|//PREDICTED: cytochrome P450 71B19-like [Cucumis sativus]
Csa3G734050	2121	3.85	13.93	1.85526490701899	1.661054e-24	1.79136161573407e-23	Up	NA	NA	NA	K04730//interleukin-1 receptor-associated kinase 1 [EC:2.7.11.1]	gi|778688795|ref|XP_004137931.2|//PREDICTED: uncharacterized protein LOC101204442 [Cucumis sativus]
Csa6G091830	954	10.37	37.50	1.85447470145738	3.66348e-23	3.76721086529319e-22	Up	NA	NA	NA	K09286//EREBP-like factor	gi|700191206|gb|KGN46410.1|//hypothetical protein Csa_6G091830 [Cucumis sativus];gi|778722055|ref|XP_011658395.1|//PREDICTED: ethylene-responsive transcription factor ERF113 [Cucumis sativus]
Csa4G280500	1044	55.12	198.59	1.84914518462767	1.257352e-155	8.96542638534798e-154	Up	NA	NA	NA	K10442//kelch-like protein 1/4/5;K10457//kelch-like protein 20;K10443//kelch-like protein 2/3	gi|449448824|ref|XP_004142165.1|//PREDICTED: F-box/kelch-repeat protein At2g44130-like [Cucumis sativus]
Csa5G601560	1477	45.36	163.20	1.84714851191663	6.41988e-123	3.51037595730337e-121	Up	NA	GO:0016836//hydro-lyase activity;GO:0046914//transition metal ion binding;GO:0004089//carbonate dehydratase activity;GO:0008270//zinc ion binding	GO:0015976//carbon utilization	K01673//carbonic anhydrase [EC:4.2.1.1]	gi|449434923|ref|XP_004135245.1|//PREDICTED: carbonic anhydrase 2-like isoform X2 [Cucumis sativus];gi|449434921|ref|XP_004135244.1|//PREDICTED: carbonic anhydrase 2-like isoform X1 [Cucumis sativus]
Csa6G452010	1059	1.78	6.40	1.84619466392096	1.919078e-06	7.11015842177389e-06	Up	NA	NA	NA	K00679//phospholipid:diacylglycerol acyltransferase [EC:2.3.1.158];K01206//alpha-L-fucosidase [EC:3.2.1.51];K10960//geranylgeranyl reductase [EC:1.3.1.83]	gi|449451124|ref|XP_004143312.1|//PREDICTED: GDSL esterase/lipase At5g03610-like [Cucumis sativus]
Csa3G183960	808	5.44	19.51	1.84253522135869	4.07744e-13	2.58286518190693e-12	Up	NA	NA	NA	K12134//circadian clock associated 1;K12133//MYB-related transcription factor LHY	gi|778679712|ref|XP_011651186.1|//PREDICTED: protein REVEILLE 6 isoform X3 [Cucumis sativus];gi|778679707|ref|XP_011651185.1|//PREDICTED: protein REVEILLE 6 isoform X1 [Cucumis sativus]
Csa6G382950	891	19.23	68.89	1.84093581535395	1.770272e-46	3.38175807183513e-45	Up	NA	GO:0003676//nucleic acid binding	NA	K02437//glycine cleavage system H protein;K13126//polyadenylate-binding protein;K00162//pyruvate dehydrogenase E1 component beta subunit [EC:1.2.4.1];K05941//glutathione gamma-glutamylcysteinyltransferase [EC:2.3.2.15]	gi|449464170|ref|XP_004149802.1|//PREDICTED: NAC domain-containing protein 2-like [Cucumis sativus]
Csa7G184670	420	17.03	60.97	1.84002111097793	1.835134e-18	1.51367451033898e-17	Up	NA	NA	NA	K03696//ATP-dependent Clp protease ATP-binding subunit ClpC	gi|700188863|gb|KGN44096.1|//hypothetical protein Csa_7G184670 [Cucumis sativus]
Csa3G143510	1659	11.34	40.51	1.83685744474421	1.444472e-52	3.1035421580574e-51	Up	NA	NA	NA	NA	gi|700201777|gb|KGN56910.1|//hypothetical protein Csa_3G143510 [Cucumis sativus]
Csa5G602180	3694	13.06	46.61	1.83548461599251	3.42908e-132	2.03507534390244e-130	Up	NA	GO:0019203//carbohydrate phosphatase activity;GO:0003824//catalytic activity;GO:0035251//UDP-glucosyltransferase activity	GO:0005992//trehalose biosynthetic process;GO:0005991//trehalose metabolic process	K16055//trehalose 6-phosphate synthase/phosphatase [EC:2.4.1.15 3.1.3.12]	gi|449434901|ref|XP_004135234.1|//PREDICTED: probable alpha,alpha-trehalose-phosphate synthase [UDP-forming] 9 [Cucumis sativus]
Csa4G410830	2043	5.26	18.77	1.83529394553857	6.83048e-31	8.93562659139785e-30	Up	NA	NA	NA	K04733//interleukin-1 receptor-associated kinase 4 [EC:2.7.11.1]	gi|700199472|gb|KGN54630.1|//hypothetical protein Csa_4G410830 [Cucumis sativus]
Csa3G900960	1047	2.76	9.84	1.83399004856107	4.73424e-09	2.25763635080843e-08	Up	NA	NA	NA	K08235//xyloglucan:xyloglucosyl transferase [EC:2.4.1.207]	gi|449436850|ref|XP_004136205.1|//PREDICTED: probable xyloglucan endotransglucosylase/hydrolase protein 30 [Cucumis sativus]
Csa2G379880	1302	15.83	56.40	1.83303390714897	2.14932e-56	4.93380461320755e-55	Up	NA	GO:0016491//oxidoreductase activity	GO:0008152//metabolic process	K09838//zeaxanthin epoxidase [EC:1.14.13.90]	gi|449442198|ref|XP_004138869.1|//PREDICTED: zeaxanthin epoxidase, chloroplastic [Cucumis sativus]
BGI_novel_G000481	824	34.86	124.17	1.83267217982576	2.3575e-75	7.3425752e-74	Up	NA	GO:0003676//nucleic acid binding	NA	K11593//eukaryotic translation initiation factor 2C	gi|659071857|ref|XP_008462248.1|//PREDICTED: protein argonaute 5 [Cucumis melo]
Csa5G434550	471	11.49	40.87	1.83066344537455	1.979498e-14	1.34871921834092e-13	Up	NA	GO:0004871//signal transducer activity	GO:0007165//signal transduction;GO:0006351//transcription, DNA-templated	K14492//two-component response regulator ARR-A family	gi|449445057|ref|XP_004140290.1|//PREDICTED: two-component response regulator ARR9-like [Cucumis sativus]
Csa3G853140	1700	3.61	12.83	1.82945042820251	5.12052e-18	4.14798345068664e-17	Up	GO:0016021//integral component of membrane	GO:0016705//oxidoreductase activity, acting on paired donors, with incorporation or reduction of molecular oxygen;GO:0020037//heme binding;GO:0005506//iron ion binding;GO:0004497//monooxygenase activity	GO:0055114//oxidation-reduction process	K00517	gi|778686472|ref|XP_011652397.1|//PREDICTED: cytochrome P450 CYP82D47-like [Cucumis sativus];gi|700204783|gb|KGN59916.1|//hypothetical protein Csa_3G853140 [Cucumis sativus]
Csa2G334540	1098	1.83	6.50	1.82859606963177	1.131892e-06	4.29752480436903e-06	Up	NA	NA	NA	K10260//F-box and WD-40 domain protein 7;K01876//aspartyl-tRNA synthetase [EC:6.1.1.12];K08332//vacuolar protein 8	gi|700207084|gb|KGN62203.1|//hypothetical protein Csa_2G334540 [Cucumis sativus]
Csa7G432490	618	6.78	24.06	1.82727946403973	7.35094e-12	4.29580900750525e-11	Up	NA	NA	NA	NA	gi|778729055|ref|XP_011659524.1|//PREDICTED: cucumber peeling cupredoxin-like [Cucumis sativus]
Csa2G357240	3173	0.99	3.51	1.82597060022495	2.40384e-09	1.17629837707391e-08	Up	NA	NA	NA	K05387//glutamate receptor, ionotropic, plant	gi|700207382|gb|KGN62501.1|//hypothetical protein Csa_2G357240 [Cucumis sativus];gi|778674308|ref|XP_011650184.1|//PREDICTED: glutamate receptor 2.5-like [Cucumis sativus]
Csa1G525300	1588	7.29	25.77	1.82170181753268	6.93464e-19	5.8563862143167e-18	Up	NA	NA	NA	K06700//proteasome inhibitor subunit 1 (PI31)	gi|449473730|ref|XP_004153966.1|//PREDICTED: uncharacterized protein LOC101213402 [Cucumis sativus]
Csa2G338830	900	42.00	148.44	1.82141867314404	9.11148e-98	3.85574064521739e-96	Up	NA	GO:0003676//nucleic acid binding	NA	K02437//glycine cleavage system H protein;K00162//pyruvate dehydrogenase E1 component beta subunit [EC:1.2.4.1];K13126//polyadenylate-binding protein;K05941//glutathione gamma-glutamylcysteinyltransferase [EC:2.3.2.15]	gi|449459190|ref|XP_004147329.1|//PREDICTED: NAC domain-containing protein 2 [Cucumis sativus]
Csa6G007440	1402	6.69	23.55	1.81564894385868	1.263334e-20	1.16826886669834e-19	Up	NA	NA	NA	K14488//SAUR family protein	gi|700190506|gb|KGN45710.1|//hypothetical protein Csa_6G007440 [Cucumis sativus];gi|778709238|ref|XP_011656369.1|//PREDICTED: uncharacterized protein LOC105435730 [Cucumis sativus]
Csa2G354690	1026	5.50	19.33	1.81333811379921	4.2459e-16	3.15581097365407e-15	Up	NA	NA	NA	K13169//splicing factor, arginine/serine-rich 17	gi|449450287|ref|XP_004142895.1|//PREDICTED: A-kinase anchor protein 17A [Cucumis sativus];gi|700207324|gb|KGN62443.1|//hypothetical protein Csa_2G354690 [Cucumis sativus]
Csa5G600370	2609	5.86	20.52	1.80805816118481	5.43604e-42	9.45647494548704e-41	Up	GO:0016021//integral component of membrane	GO:0004674//protein serine/threonine kinase activity;GO:0005524//ATP binding;GO:0004715//non-membrane spanning protein tyrosine kinase activity;GO:0000166//nucleotide binding;GO:0004672//protein kinase activity	GO:0018108//peptidyl-tyrosine phosphorylation	K04733//interleukin-1 receptor-associated kinase 4 [EC:2.7.11.1];K04730//interleukin-1 receptor-associated kinase 1 [EC:2.7.11.1]	gi|449434953|ref|XP_004135260.1|//PREDICTED: cysteine-rich receptor-like protein kinase 3 [Cucumis sativus];gi|700196607|gb|KGN51784.1|//hypothetical protein Csa_5G600370 [Cucumis sativus]
Csa3G739050	540	9.35	32.72	1.80713447816675	2.10516e-13	1.35692200529801e-12	Up	NA	NA	NA	NA	gi|449440101|ref|XP_004137823.1|//PREDICTED: uncharacterized protein LOC101217342 [Cucumis sativus]
Csa5G603920	2457	4.30	15.03	1.8054364443269	2.53038e-29	3.15543735297886e-28	Up	NA	NA	NA	K18875//enhanced disease susceptibility 1 protein;K02184//formin 2	gi|449435372|ref|XP_004135469.1|//PREDICTED: formin-like protein 4 [Cucumis sativus]
Csa2G351800	1473	14.51	50.64	1.8032298853616	2.0882e-56	4.79916188902007e-55	Up	GO:0009536//plastid	GO:0016829//lyase activity	GO:0006779//porphyrin-containing compound biosynthetic process	K01772//ferrochelatase [EC:4.99.1.1]	gi|778670825|ref|XP_011649543.1|//PREDICTED: ferrochelatase-2, chloroplastic [Cucumis sativus]
Csa2G404760	2121	54.47	189.15	1.79599700409629	2.97814e-298	4.79111349090909e-296	Up	NA	NA	GO:0006810//transport	NA	gi|449442074|ref|XP_004138807.1|//PREDICTED: probable metal-nicotianamine transporter YSL7 [Cucumis sativus]
Csa1G470240	756	3.74	12.96	1.79295554299699	3.05968e-08	1.36043240931932e-07	Up	NA	NA	NA	NA	gi|700210512|gb|KGN65608.1|//hypothetical protein Csa_1G470240 [Cucumis sativus]
Csa6G500400	624	5.24	18.12	1.78994423850878	4.06182e-09	1.9469930588525e-08	Up	NA	GO:0032561//guanyl ribonucleotide binding;GO:0003824//catalytic activity	GO:0006810//transport;GO:0035556//intracellular signal transduction	K07893//Ras-related protein Rab-6A	gi|449451431|ref|XP_004143465.1|//PREDICTED: ras-related protein RABH1e [Cucumis sativus]
Csa1G574870	1776	163.83	566.43	1.78969811468359	0	0	Up	GO:0044424//intracellular part	GO:0043169//cation binding;GO:0000166//nucleotide binding;GO:0004470//malic enzyme activity	GO:0043648//dicarboxylic acid metabolic process	K00029//malate dehydrogenase (oxaloacetate-decarboxylating)(NADP+) [EC:1.1.1.40]	gi|449435772|ref|XP_004135668.1|//PREDICTED: NADP-dependent malic enzyme [Cucumis sativus]
Csa7G407550	2956	13.21	45.66	1.78930039297787	2.1874e-98	9.31727098468271e-97	Up	GO:0016020//membrane	NA	NA	NA	gi|778728215|ref|XP_011659388.1|//PREDICTED: uncharacterized protein LOC101220023 [Cucumis sativus];gi|700189769|gb|KGN45002.1|//hypothetical protein Csa_7G407550 [Cucumis sativus]
Csa1G572390	1827	9.54	32.87	1.7847102850748	2.15164e-43	3.86738912650046e-42	Up	GO:0005634//nucleus	GO:0003677//DNA binding	GO:0006355//regulation of transcription, DNA-templated	K12581//CCR4-NOT transcription complex subunit 7/8;K13126//polyadenylate-binding protein;K05941//glutathione gamma-glutamylcysteinyltransferase [EC:2.3.2.15];K01054//acylglycerol lipase [EC:3.1.1.23]	gi|778662593|ref|XP_011659914.1|//PREDICTED: NAC transcription factor 25-like [Cucumis sativus]
Csa3G829270	1932	5.57	19.13	1.78008764100608	1.36042e-28	1.66448370333124e-27	Up	NA	NA	NA	K10529//alpha-dioxygenase [EC:1.-.-.-]	gi|778685730|ref|XP_004147441.2|//PREDICTED: alpha-dioxygenase 1 [Cucumis sativus]
Csa3G845500	2781	16.60	56.84	1.77572331300849	7.98622e-118	4.11269202433862e-116	Up	NA	NA	NA	K13447//respiratory burst oxidase [EC:1.6.3.- 1.11.1.-]	gi|449446795|ref|XP_004141156.1|//PREDICTED: respiratory burst oxidase homolog protein C [Cucumis sativus]
Csa7G433350	1137	1.21	4.14	1.77462372022473	0.000157192	0.00046327016987131	Up	NA	NA	NA	NA	gi|778729165|ref|XP_011659542.1|//PREDICTED: uncharacterized protein LOC101203701 isoform X1 [Cucumis sativus]
Csa5G139730	888	5.15	17.61	1.77375057176063	2.22902e-12	1.34751873664596e-11	Up	GO:0005576//extracellular region	GO:0004553//hydrolase activity, hydrolyzing O-glycosyl compounds	GO:0000272//polysaccharide catabolic process	K01183//chitinase [EC:3.2.1.14]	gi|449456357|ref|XP_004145916.1|//PREDICTED: acidic endochitinase-like [Cucumis sativus]
Csa3G651820	1287	7.63	26.06	1.7720821217336	1.904978e-25	2.11536233588135e-24	Up	NA	NA	NA	K05280//flavonoid 3'-monooxygenase [EC:1.14.13.21];K07408//cytochrome P450, family 1, subfamily A, polypeptide 1 [EC:1.14.14.1]	gi|778682573|ref|XP_004148565.2|//PREDICTED: cytochrome P450 71A1-like, partial [Cucumis sativus]
Csa7G278230	1044	22.75	77.63	1.77074774224589	1.932792e-58	4.60510759755202e-57	Up	NA	NA	NA	K13148//integrator complex subunit 11 [EC:3.1.27.-]	gi|778726317|ref|XP_011659087.1|//PREDICTED: E3 ubiquitin-protein ligase At4g11680-like isoform X1 [Cucumis sativus]
Csa2G308350	2869	46.69	158.87	1.7666612273599	5.78852e-266	7.82495349444444e-264	Up	NA	NA	NA	K12602//WD repeat-containing protein 61;K14963//COMPASS component SWD3	gi|778670230|ref|XP_011649409.1|//PREDICTED: uncharacterized WD repeat-containing protein C2A9.03 [Cucumis sativus]
Csa2G404780	2634	3.39	11.53	1.76603533451543	3.26038e-21	3.08090082912621e-20	Up	GO:0016021//integral component of membrane	NA	GO:0055085//transmembrane transport	K01807//ribose 5-phosphate isomerase A [EC:5.3.1.6]	gi|700208007|gb|KGN63126.1|//hypothetical protein Csa_2G404780 [Cucumis sativus];gi|449441738|ref|XP_004138639.1|//PREDICTED: probable metal-nicotianamine transporter YSL8 [Cucumis sativus]
Csa6G516930	1903	4.14	14.07	1.76491965573721	1.243952e-20	1.15089209277567e-19	Up	GO:0031224//intrinsic component of membrane;GO:0016021//integral component of membrane	GO:0015291//secondary active transmembrane transporter activity;GO:0016628//oxidoreductase activity, acting on the CH-CH group of donors, NAD or NADP as acceptor;GO:0022891//substrate-specific transmembrane transporter activity	GO:0055085//transmembrane transport;GO:0071702//organic substance transport;GO:0008152//metabolic process	K08145//MFS transporter, SP family, solute carrier family 2 (facilitated glucose transporter), member 8;K08150//MFS transporter, SP family, solute carrier family 2 (myo-inositol transporter), member 13	gi|449434356|ref|XP_004134962.1|//PREDICTED: sugar carrier protein C-like [Cucumis sativus]
Csa7G037590	480	36.52	124.10	1.7647444450335	8.18712e-40	1.354039744435e-38	Up	NA	NA	NA	K01213//galacturan 1,4-alpha-galacturonidase [EC:3.2.1.67]	gi|778723597|ref|XP_011658677.1|//PREDICTED: exopolygalacturonase-like [Cucumis sativus]
Csa2G263850	960	1.32	4.48	1.76296080269915	0.000271558	0.000770800237386993	Up	NA	NA	NA	K09866//aquaporin-4	gi|449464720|ref|XP_004150077.1|//PREDICTED: aquaporin TIP1-2-like [Cucumis sativus]
Csa1G089490	858	9.34	31.65	1.76071104460604	3.66186e-20	3.30314025764597e-19	Up	GO:0031224//intrinsic component of membrane	NA	NA	K17345//tetraspanin-5	gi|449459074|ref|XP_004147271.1|//PREDICTED: tetraspanin-3-like [Cucumis sativus]
BGI_novel_G000098	1568	2.19	7.42	1.76048831701963	5.8755e-10	3.00821891109942e-09	Up	NA	NA	NA	K13081//leucoanthocyanidin reductase [EC:1.17.1.3]	gi|778669354|ref|XP_004148840.2|//PREDICTED: isoflavone reductase-like protein [Cucumis sativus]
Csa3G874380	1233	19.39	65.68	1.76014132367101	1.523412e-58	3.63415906764706e-57	Up	NA	GO:0043169//cation binding	GO:0007165//signal transduction	K17609//nucleoredoxin [EC:1.8.1.8]	gi|449437178|ref|XP_004136369.1|//PREDICTED: probable nucleoredoxin 2 [Cucumis sativus]
Csa1G073050	1458	1.10	3.72	1.75779909758337	3.39648e-05	0.000109754116334661	Up	NA	GO:0004180//carboxypeptidase activity	GO:0019538//protein metabolic process	K16297//serine carboxypeptidase-like clade II [EC:3.4.16.-]	gi|449457710|ref|XP_004146591.1|//PREDICTED: serine carboxypeptidase-like 31 [Cucumis sativus]
Csa7G029930	2076	4.23	14.30	1.7572855785458	6.17804e-23	6.28983925941423e-22	Up	NA	GO:0004672//protein kinase activity;GO:0005488//binding	NA	K04733//interleukin-1 receptor-associated kinase 4 [EC:2.7.11.1];K04730//interleukin-1 receptor-associated kinase 1 [EC:2.7.11.1]	gi|449453642|ref|XP_004144565.1|//PREDICTED: probable L-type lectin-domain containing receptor kinase S.5 [Cucumis sativus]
Csa2G094380	2243	33.05	111.67	1.7565194828845	7.62824e-180	6.2920050779661e-178	Up	NA	GO:0032561//guanyl ribonucleotide binding;GO:0017111//nucleoside-triphosphatase activity	GO:0009207//purine ribonucleoside triphosphate catabolic process	K14754//interferon-induced GTP-binding protein Mx1	gi|700206228|gb|KGN61347.1|//Interferon-induced GTP-binding protein mx [Cucumis sativus]
Csa4G129600	2679	7.02	23.71	1.75595272717745	1.124012e-47	2.20787261271443e-46	Up	NA	NA	NA	K04733//interleukin-1 receptor-associated kinase 4 [EC:2.7.11.1];K04730//interleukin-1 receptor-associated kinase 1 [EC:2.7.11.1]	gi|449438963|ref|XP_004137257.1|//PREDICTED: receptor-like protein kinase FERONIA [Cucumis sativus]
Csa3G646010	417	64.74	218.54	1.75516809382634	9.40408e-58	2.21890692460606e-56	Up	NA	NA	NA	NA	gi|700203330|gb|KGN58463.1|//hypothetical protein Csa_3G646010 [Cucumis sativus]
Csa6G516770	3218	7.10	23.96	1.75473697839674	1.092188e-57	2.57391423825666e-56	Up	NA	GO:0004672//protein kinase activity;GO:0005488//binding	NA	K04733//interleukin-1 receptor-associated kinase 4 [EC:2.7.11.1];K04730//interleukin-1 receptor-associated kinase 1 [EC:2.7.11.1]	gi|700193965|gb|KGN49169.1|//hypothetical protein Csa_6G516770 [Cucumis sativus];gi|778720590|ref|XP_011658179.1|//PREDICTED: G-type lectin S-receptor-like serine/threonine-protein kinase B120 isoform X1 [Cucumis sativus]
Csa1G569400	396	96.81	326.49	1.75381082075824	3.02526e-80	1.01011511423671e-78	Up	NA	NA	NA	NA	gi|449435651|ref|XP_004135608.1|//PREDICTED: uncharacterized protein LOC101205077 isoform X1 [Cucumis sativus]
Csa1G045650	1575	9.54	32.15	1.7527575662098	1.683506e-37	2.607090516786e-36	Up	NA	NA	NA	K08900//mitochondrial chaperone BCS1	gi|449469669|ref|XP_004152541.1|//PREDICTED: probable mitochondrial chaperone BCS1-B [Cucumis sativus]
Csa5G647470	1689	39.87	134.32	1.7522986249397	2.16582e-162	1.62153277384615e-160	Up	NA	GO:0016668//oxidoreductase activity, acting on a sulfur group of donors, NAD(P) as acceptor	GO:0019725//cellular homeostasis;GO:0008152//metabolic process	K17609//nucleoredoxin [EC:1.8.1.8]	gi|449447547|ref|XP_004141529.1|//PREDICTED: probable nucleoredoxin 1 [Cucumis sativus]
Csa2G369740	1116	14.58	49.11	1.75202610286837	1.161742e-39	1.9083940735865e-38	Up	GO:0016020//membrane	NA	NA	K08695//anthocyanidin reductase [EC:1.3.1.77];K15272//solute carrier family 35 (UDP-sugar transporter), member A1/2/3	gi|449469825|ref|XP_004152619.1|//PREDICTED: purine permease 3-like [Cucumis sativus]
Csa4G017050	3905	12.52	42.09	1.74924294740844	1.485704e-120	7.94525111648351e-119	Up	NA	GO:0005199//structural constituent of cell wall	GO:0009664//plant-type cell wall organization	K02184//formin 2	gi|778697480|ref|XP_011654331.1|//PREDICTED: extensin-2-like [Cucumis sativus]
Csa5G157310	1600	4.17	14.01	1.74833766698615	9.47654e-20	8.35463440398551e-19	Up	GO:0016020//membrane	GO:0046872//metal ion binding;GO:0016491//oxidoreductase activity	NA	K00517;K16084//ent-cassa-12,15-diene 11-hydroxylase [EC:1.14.13.145];K00512//steroid 17alpha-monooxygenase / 17alpha-hydroxyprogesterone aldolase [EC:1.14.14.19 4.1.2.30]	gi|700194995|gb|KGN50172.1|//hypothetical protein Csa_5G157310 [Cucumis sativus];gi|778699842|ref|XP_011654780.1|//PREDICTED: geraniol 8-hydroxylase-like [Cucumis sativus]
Csa4G000820	596	45.28	152.03	1.74741017473282	9.47476e-67	2.58675565441795e-65	Up	NA	NA	NA	NA	gi|700197604|gb|KGN52762.1|//hypothetical protein Csa_4G000820 [Cucumis sativus]
Csa6G052700	992	5.28	17.68	1.74350844003298	4.35254e-13	2.75354382970426e-12	Up	NA	NA	NA	K15730//cytosolic prostaglandin-E synthase [EC:5.3.99.3]	gi|449446367|ref|XP_004140943.1|//PREDICTED: uncharacterized protein At3g03773-like isoform X1 [Cucumis sativus]
Csa1G039200	2072	2.29	7.66	1.74199679382801	5.41604e-17	4.19532967130919e-16	Up	NA	NA	NA	K07195//exocyst complex component 7	gi|700208958|gb|KGN64054.1|//hypothetical protein Csa_1G039200 [Cucumis sativus];gi|449439653|ref|XP_004137600.1|//PREDICTED: exocyst complex component EXO70A1 [Cucumis sativus]
Csa3G823070	948	5.60	18.68	1.7379957227647	1.510288e-13	9.82267497761443e-13	Up	NA	NA	NA	K01090//protein phosphatase [EC:3.1.3.16];K14501//serine/threonine-protein phosphatase BSU1 [EC:3.1.3.16]	gi|449437787|ref|XP_004136672.1|//PREDICTED: uncharacterized protein LOC101207810 [Cucumis sativus]
Csa6G526280	1942	21.92	72.85	1.73268117399135	3.05564e-89	1.16858719528487e-87	Up	NA	GO:0016857//racemase and epimerase activity, acting on carbohydrates and derivatives;GO:0048037//cofactor binding;GO:0003978//UDP-glucose 4-epimerase activity	GO:0006012//galactose metabolic process;GO:0019318//hexose metabolic process	K12448//UDP-arabinose 4-epimerase [EC:5.1.3.5]	gi|449433525|ref|XP_004134548.1|//PREDICTED: UDP-arabinose 4-epimerase 1 [Cucumis sativus]
Csa1G071280	2887	3.04	10.09	1.73078294566277	1.337252e-23	1.40026613405056e-22	Up	NA	GO:0016301//kinase activity	GO:0009987//cellular process	K04733//interleukin-1 receptor-associated kinase 4 [EC:2.7.11.1];K00276//primary-amine oxidase [EC:1.4.3.21];K04730//interleukin-1 receptor-associated kinase 1 [EC:2.7.11.1];K05349//beta-glucosidase [EC:3.2.1.21]	gi|700209518|gb|KGN64614.1|//hypothetical protein Csa_1G071280 [Cucumis sativus];gi|659068839|ref|XP_008446571.1|//PREDICTED: uncharacterized protein LOC103489262 [Cucumis melo];gi|778658598|ref|XP_011652948.1|//PREDICTED: G-type lectin S-receptor-like serine/threonine-protein kinase At1g11330 [Cucumis sativus]
Csa2G074190	4173	19.46	64.55	1.72990538541344	6.33888e-186	5.36489730782608e-184	Up	GO:0016021//integral component of membrane	GO:0005524//ATP binding;GO:0042626//ATPase activity, coupled to transmembrane movement of substances	GO:0055085//transmembrane transport	K05658//ATP-binding cassette, subfamily B (MDR/TAP), member 1 [EC:3.6.3.44]	gi|778667858|ref|XP_004152829.2|//PREDICTED: ABC transporter B family member 4-like [Cucumis sativus]
Csa2G298280	1602	4.30	14.26	1.72956541685443	1.842524e-17	1.45385375695176e-16	Up	NA	GO:0005506//iron ion binding;GO:0004497//monooxygenase activity	NA	K00517	gi|778670158|ref|XP_011649386.1|//PREDICTED: cytochrome P450 78A7 [Cucumis sativus]
Csa2G348950	555	7.55	25.01	1.72795650796853	1.745974e-10	9.26837466157622e-10	Up	NA	GO:0000166//nucleotide binding;GO:0004672//protein kinase activity	NA	K04733//interleukin-1 receptor-associated kinase 4 [EC:2.7.11.1]	gi|700207190|gb|KGN62309.1|//hypothetical protein Csa_2G348950 [Cucumis sativus]
Csa4G361850	1233	2.32	7.67	1.72510177237536	6.74352e-08	2.90290491640867e-07	Up	NA	NA	NA	K00924;K11450//lysine-specific histone demethylase 1A [EC:1.-.-.-]	gi|449449906|ref|XP_004142705.1|//PREDICTED: aspartic proteinase Asp1-like [Cucumis sativus]
Csa5G517130	936	15.68	51.81	1.72430502413487	4.17158e-34	5.94900925128205e-33	Up	NA	NA	NA	NA	gi|778703422|ref|XP_004142760.2|//PREDICTED: uncharacterized protein LOC101214727 [Cucumis sativus]
Csa3G852470	960	14.47	47.66	1.71971402965855	3.32416e-32	4.50927516097561e-31	Up	NA	NA	NA	K02437//glycine cleavage system H protein;K00162//pyruvate dehydrogenase E1 component beta subunit [EC:1.2.4.1];K13126//polyadenylate-binding protein;K05941//glutathione gamma-glutamylcysteinyltransferase [EC:2.3.2.15]	gi|449460145|ref|XP_004147806.1|//PREDICTED: NAC domain-containing protein 72-like isoform X2 [Cucumis sativus]
Csa5G550230	2478	2.30	7.57	1.71865943904136	1.113096e-14	7.68352011914894e-14	Up	NA	GO:0004672//protein kinase activity;GO:0005488//binding	NA	K04733//interleukin-1 receptor-associated kinase 4 [EC:2.7.11.1];K00276//primary-amine oxidase [EC:1.4.3.21]	gi|778703897|ref|XP_004142824.2|//PREDICTED: G-type lectin S-receptor-like serine/threonine-protein kinase SD2-2 [Cucumis sativus]
Csa3G872740	1684	4.24	13.95	1.71812895215335	6.62618e-17	5.11440205709754e-16	Up	NA	NA	NA	K14297//nuclear pore complex protein Nup98-Nup96;K12173//BRCA1-A complex subunit BRE	gi|449437194|ref|XP_004136377.1|//PREDICTED: thaumatin-like protein 1b [Cucumis sativus]
Csa3G835770	375	4.76	15.63	1.71528429969172	5.83186e-05	0.000182395544280206	Up	NA	NA	NA	NA	gi|778685742|ref|XP_011652265.1|//PREDICTED: WAT1-related protein At5g40240 [Cucumis sativus]
Csa7G413890	831	2.30	7.54	1.71293066232429	1.7925e-05	5.97274991441287e-05	Up	NA	NA	NA	K09422//myb proto-oncogene protein, plant	gi|778728329|ref|XP_004136147.2|//PREDICTED: transcription factor MYB108-like [Cucumis sativus]
Csa6G525670	1845	37.09	121.58	1.71280375094363	5.119e-145	3.4720018815331e-143	Up	NA	GO:0016614//oxidoreductase activity, acting on CH-OH group of donors;GO:0050660//flavin adenine dinucleotide binding;GO:0003824//catalytic activity;GO:0050662//coenzyme binding	GO:0008152//metabolic process;GO:0055114//oxidation-reduction process	K00102//D-lactate dehydrogenase (cytochrome) [EC:1.1.2.4];K00279//cytokinin dehydrogenase [EC:1.5.99.12]	gi|449433535|ref|XP_004134553.1|//PREDICTED: reticuline oxidase-like protein [Cucumis sativus];gi|700194278|gb|KGN49482.1|//hypothetical protein Csa_6G525670 [Cucumis sativus]
Csa6G499800	1596	24.38	79.90	1.71249737719513	5.48664e-89	2.08192854269006e-87	Up	NA	GO:0016765//transferase activity, transferring alkyl or aryl (other than methyl) groups	GO:0008652//cellular amino acid biosynthetic process	K01626//3-deoxy-7-phosphoheptulonate synthase [EC:2.5.1.54]	gi|449451419|ref|XP_004143459.1|//PREDICTED: phospho-2-dehydro-3-deoxyheptonate aldolase 2, chloroplastic [Cucumis sativus]
Csa5G610370	2200	5.82	19.05	1.7106999394724	3.4424e-29	4.28177369968051e-28	Up	GO:0016021//integral component of membrane	GO:0004674//protein serine/threonine kinase activity;GO:0005524//ATP binding	GO:0006468//protein phosphorylation	K04733//interleukin-1 receptor-associated kinase 4 [EC:2.7.11.1];K04730//interleukin-1 receptor-associated kinase 1 [EC:2.7.11.1]	gi|778706037|ref|XP_011655784.1|//PREDICTED: probable receptor-like protein kinase At5g39030 [Cucumis sativus];gi|700196926|gb|KGN52103.1|//hypothetical protein Csa_5G610370 [Cucumis sativus]
Csa6G080330	2973	3.74	12.24	1.71049338280502	4.72218e-27	5.48787796298507e-26	Up	NA	NA	NA	K10406//kinesin family member C2/C3;K13420//LRR receptor-like serine/threonine-protein kinase FLS2 [EC:2.7.11.1]	gi|778711362|ref|XP_004153416.2|//PREDICTED: receptor-like protein 12 [Cucumis sativus]
Csa3G651800	1446	6.51	21.30	1.71012398194757	1.251356e-11	7.21745063585185e-11	Up	NA	NA	NA	K07410//cytochrome P450, family 1, subfamily B, polypeptide 1 [EC:1.14.14.1];K07409//cytochrome P450, family 1, subfamily A, polypeptide 2 [EC:1.14.14.1];K05280//flavonoid 3'-monooxygenase [EC:1.14.13.21];K07408//cytochrome P450, family 1, subfamily A, polypeptide 1 [EC:1.14.14.1]	gi|778682570|ref|XP_004148586.2|//PREDICTED: cytochrome P450 71A1-like [Cucumis sativus];gi|700203363|gb|KGN58496.1|//hypothetical protein Csa_3G651800 [Cucumis sativus]
Csa6G008740	1881	2.60	8.50	1.70895121799661	1.56333e-12	9.53675392666876e-12	Up	NA	GO:0000166//nucleotide binding;GO:0004672//protein kinase activity	NA	K04733//interleukin-1 receptor-associated kinase 4 [EC:2.7.11.1];K04730//interleukin-1 receptor-associated kinase 1 [EC:2.7.11.1]	gi|778709362|ref|XP_011656392.1|//PREDICTED: wall-associated receptor kinase-like 20 [Cucumis sativus]
Csa6G152350	1650	0.82	2.68	1.70853718583969	0.00024519	0.000701376714180749	Up	NA	GO:0005488//binding	NA	K14431//transcription factor TGA	gi|700191745|gb|KGN46949.1|//hypothetical protein Csa_6G152350 [Cucumis sativus]
Csa6G082030	1392	1.69	5.51	1.70502907228897	1.351942e-06	5.08834164191802e-06	Up	NA	NA	NA	NA	gi|778722033|ref|XP_004153114.2|//PREDICTED: uncharacterized protein LOC101207511 [Cucumis sativus]
Csa6G010030	1446	23.00	74.84	1.70217569740905	8.37212e-75	2.57866594810127e-73	Up	NA	NA	NA	NA	gi|778709480|ref|XP_011656406.1|//PREDICTED: nematode resistance protein-like HSPRO2 [Cucumis sativus]
Csa5G409710	438	71.78	233.41	1.70121254358136	2.06176e-62	5.30174638837517e-61	Up	NA	GO:0016765//transferase activity, transferring alkyl or aryl (other than methyl) groups	NA	K00799//glutathione S-transferase [EC:2.5.1.18]	gi|449445098|ref|XP_004140310.1|//PREDICTED: microsomal glutathione S-transferase 3 [Cucumis sativus]
Csa5G598610	1506	5.43	17.65	1.70064408035418	1.563232e-19	1.36151562022371e-18	Up	NA	NA	NA	K19613//leucine-rich repeat protein SHOC2	gi|449434977|ref|XP_004135272.1|//PREDICTED: plant intracellular Ras-group-related LRR protein 3 [Cucumis sativus]
Csa7G066270	1083	4.43	14.39	1.69968798818528	6.84356e-12	4.0101366333534e-11	Up	NA	NA	NA	K16189//phytochrome-interacting factor 4	gi|449438234|ref|XP_004136894.1|//PREDICTED: transcription factor bHLH143 [Cucumis sativus]
Csa4G269770	1161	10.54	34.19	1.69769955579618	4.94018e-28	5.92882514673243e-27	Up	NA	NA	NA	K04733//interleukin-1 receptor-associated kinase 4 [EC:2.7.11.1]	gi|778692870|ref|XP_011653538.1|//PREDICTED: protein kinase 2B, chloroplastic-like [Cucumis sativus]
Csa3G635870	1594	17.15	55.58	1.69635725814039	7.9822e-60	1.94957973902133e-58	Up	NA	GO:0016757//transferase activity, transferring glycosyl groups;GO:0016758//transferase activity, transferring hexosyl groups	GO:0008152//metabolic process	K13691//pathogen-inducible salicylic acid glucosyltransferase [EC:2.4.1.-]	gi|449453306|ref|XP_004144399.1|//PREDICTED: UDP-glycosyltransferase 74F2 [Cucumis sativus]
Csa7G407710	2905	1.13	3.65	1.69157369135219	1.746048e-06	6.49504497764189e-06	Up	NA	NA	GO:0006355//regulation of transcription, DNA-templated	K14494//DELLA protein	gi|449436743|ref|XP_004136152.1|//PREDICTED: DELLA protein RGL2 [Cucumis sativus];gi|700189785|gb|KGN45018.1|//hypothetical protein Csa_7G407710 [Cucumis sativus]
Csa4G500830	754	147.68	476.96	1.69139382234539	2.41946e-230	2.63112895865922e-228	Up	NA	GO:0030246//carbohydrate binding	NA	K16219//protein N-terminal methyltransferase [EC:2.1.1.244]	gi|700199641|gb|KGN54799.1|//hypothetical protein Csa_4G500830 [Cucumis sativus]
Csa3G389850	675	2.88	9.27	1.68650052718322	2.76872e-05	9.04445435811378e-05	Up	GO:0043231//intracellular membrane-bounded organelle	GO:0001071//nucleic acid binding transcription factor activity;GO:0003676//nucleic acid binding	GO:0006351//transcription, DNA-templated	K14516//ethylene-responsive transcription factor 1	gi|449468546|ref|XP_004151982.1|//PREDICTED: ethylene-responsive transcription factor 1B-like [Cucumis sativus]
Csa5G158540	654	6.13	19.72	1.68570057268713	1.501036e-09	7.45957793617564e-09	Up	NA	NA	NA	NA	gi|449459682|ref|XP_004147575.1|//PREDICTED: uncharacterized protein LOC101211926 isoform X2 [Cucumis sativus];gi|778699901|ref|XP_011654785.1|//PREDICTED: uncharacterized protein LOC101211926 isoform X1 [Cucumis sativus]
Csa7G129380	2226	21.95	70.51	1.68360694083332	5.48368e-108	2.56599314615385e-106	Up	NA	NA	NA	K10999//cellulose synthase A [EC:2.4.1.12]	gi|778725395|ref|XP_004148922.2|//PREDICTED: cellulose synthase-like protein E6 [Cucumis sativus]
Csa3G556210	1173	7.88	25.31	1.68343997265431	3.72794e-21	3.51249177347531e-20	Up	NA	GO:0008081//phosphoric diester hydrolase activity	GO:0019400//alditol metabolic process	K18696//glycerophosphodiester phosphodiesterase [EC:3.1.4.46]	gi|449460535|ref|XP_004148001.1|//PREDICTED: glycerophosphodiester phosphodiesterase GDPD1, chloroplastic [Cucumis sativus]
Csa5G151530	957	1.85	5.94	1.68293766028445	4.76436e-05	0.000150752652405722	Up	NA	NA	NA	K13434//pathogenesis-related genes transcriptional activator PTI6	gi|449452420|ref|XP_004143957.1|//PREDICTED: ethylene-responsive transcription factor CRF2-like [Cucumis sativus]
BGI_novel_G000197	1006	7.88	25.27	1.6811581294884	2.93012e-18	2.3945304752309e-17	Up	NA	GO:0046872//metal ion binding;GO:0004222//metalloendopeptidase activity	GO:0006508//proteolysis	K01408//insulysin [EC:3.4.24.56]	gi|778684988|ref|XP_011652139.1|//PREDICTED: zinc-metallopeptidase, peroxisomal-like isoform X2 [Cucumis sativus]
Csa3G134770	1749	8.63	27.64	1.6793251512093	5.06182e-34	7.2027330497076e-33	Up	GO:0044464//cell part	NA	GO:0015833//peptide transport	K14638//solute carrier family 15 (peptide/histidine transporter), member 3/4	gi|449433235|ref|XP_004134403.1|//PREDICTED: protein NRT1/ PTR FAMILY 5.2-like [Cucumis sativus]
Csa3G144210	453	5.40	17.29	1.67890655659145	5.47596e-06	1.93387223076923e-05	Up	NA	GO:0046872//metal ion binding;GO:0016628//oxidoreductase activity, acting on the CH-CH group of donors, NAD or NADP as acceptor	GO:0008152//metabolic process	K13448//calcium-binding protein CML	gi|449432650|ref|XP_004134112.1|//PREDICTED: calmodulin-like protein 11 [Cucumis sativus]
Csa7G253800	1548	1.19	3.81	1.67882942418538	2.76872e-05	9.04293683221477e-05	Up	GO:0016020//membrane	GO:0005215//transporter activity;GO:0016491//oxidoreductase activity	GO:0006810//transport	K08150//MFS transporter, SP family, solute carrier family 2 (myo-inositol transporter), member 13	gi|449461166|ref|XP_004148313.1|//PREDICTED: putative polyol transporter 1 isoform X1 [Cucumis sativus]
Csa5G599830	4753	9.18	29.39	1.67875930023752	4.15484e-98	1.7620504453159e-96	Up	GO:0009536//plastid;GO:0009941//chloroplast envelope;GO:0005739//mitochondrion;GO:0009570//chloroplast stroma	GO:0005524//ATP binding;GO:0016301//kinase activity;GO:0004673//protein histidine kinase activity;GO:0043169//cation binding;GO:0050521//alpha-glucan, water dikinase activity;GO:0004672//protein kinase activity;GO:0032559//adenyl ribonucleotide binding;GO:0000166//nucleotide binding	GO:0018106//peptidyl-histidine phosphorylation;GO:0008152//metabolic process;GO:0044238//primary metabolic process;GO:0006796//phosphate-containing compound metabolic process;GO:0005983//starch catabolic process;GO:0009631//cold acclimation	K08244//alpha-glucan, water dikinase [EC:2.7.9.4]	gi|778704983|ref|XP_011655614.1|//PREDICTED: alpha-glucan water dikinase, chloroplastic [Cucumis sativus]
Csa1G073640	1734	4.39	14.05	1.67827728557293	6.83292e-18	5.50992629328915e-17	Up	GO:0009536//plastid	NA	NA	K00422//polyphenol oxidase [EC:1.10.3.1]	gi|449457817|ref|XP_004146644.1|//PREDICTED: polyphenol oxidase, chloroplastic-like [Cucumis sativus]
Csa5G597510	2583	12.17	38.89	1.67607006672048	1.221792e-69	3.52869481780415e-68	Up	NA	NA	NA	K04459//dual specificity MAP kinase phosphatase [EC:3.1.3.16 3.1.3.48]	gi|449434993|ref|XP_004135280.1|//PREDICTED: protein-tyrosine-phosphatase MKP1-like [Cucumis sativus]
Csa7G432350	423	14.94	47.65	1.67329606600807	3.66808e-13	2.33190219725669e-12	Up	NA	NA	NA	NA	gi|778729019|ref|XP_004154113.2|//PREDICTED: VQ motif-containing protein 11 [Cucumis sativus]
BGI_novel_G000344	2135	1.48	4.72	1.67318968373289	2.33718e-08	1.05143392373469e-07	Up	GO:0016021//integral component of membrane	NA	GO:0055085//transmembrane transport	K14794//ribosomal RNA-processing protein 12	gi|778706491|ref|XP_004142500.2|//PREDICTED: protein NUCLEAR FUSION DEFECTIVE 4-like [Cucumis sativus]
Csa6G405910	1226	1.56	4.96	1.66879409152463	8.38608e-06	2.90727396758682e-05	Up	NA	NA	NA	K03648//uracil-DNA glycosylase [EC:3.2.2.27];K18173//cytochrome c oxidase assembly factor 1	gi|700192625|gb|KGN47829.1|//hypothetical protein Csa_6G405910 [Cucumis sativus];gi|778722290|ref|XP_004149919.2|//PREDICTED: uncharacterized protein LOC101207616 [Cucumis sativus]
Csa6G076830	537	28.48	90.54	1.66860616028144	9.10336e-31	1.18611784310576e-29	Up	NA	NA	NA	K13448//calcium-binding protein CML	gi|449470826|ref|XP_004153117.1|//PREDICTED: calmodulin-beta-like [Cucumis sativus]
Csa7G448900	1782	42.44	134.90	1.66839378692087	2.0366e-149	1.41083471886121e-147	Up	GO:0005829//cytosol	GO:0004029//aldehyde dehydrogenase (NAD) activity	GO:0055114//oxidation-reduction process	K14085//aldehyde dehydrogenase family 7 member A1 [EC:1.2.1.31 1.2.1.8 1.2.1.3]	gi|449447906|ref|XP_004141707.1|//PREDICTED: aldehyde dehydrogenase family 7 member B4 [Cucumis sativus]
Csa1G011510	3300	2.82	8.96	1.66780356965881	1.193344e-21	1.14431696078818e-20	Up	GO:0016020//membrane	GO:0016787//hydrolase activity;GO:0000166//nucleotide binding;GO:0004672//protein kinase activity	NA	K04730//interleukin-1 receptor-associated kinase 1 [EC:2.7.11.1]	gi|778656010|ref|XP_011660222.1|//PREDICTED: probable LRR receptor-like serine/threonine-protein kinase At1g74360 [Cucumis sativus]
Csa6G501320	1576	15.28	48.53	1.66723231672845	1.722214e-46	3.29318445225933e-45	Up	NA	NA	NA	K07409//cytochrome P450, family 1, subfamily A, polypeptide 2 [EC:1.14.14.1];K09755//ferulate-5-hydroxylase [EC:1.14.-.-];K14985//26-hydroxylase [EC:1.14.-.-];K00512//steroid 17alpha-monooxygenase / 17alpha-hydroxyprogesterone aldolase [EC:1.14.14.19 4.1.2.30];K05280//flavonoid 3'-monooxygenase [EC:1.14.13.21];K07408//cytochrome P450, family 1, subfamily A, polypeptide 1 [EC:1.14.14.1]	gi|659080206|ref|XP_008440668.1|//PREDICTED: cytochrome P450 CYP736A12-like [Cucumis melo];gi|700193587|gb|KGN48791.1|//hypothetical protein Csa_6G501320 [Cucumis sativus]
Csa2G006000	277	9.77	30.92	1.66210985195646	6.7502e-06	2.36287346160762e-05	Up	NA	NA	NA	NA	gi|778666021|ref|XP_004139325.2|//PREDICTED: uncharacterized protein LOC101204118 [Cucumis sativus]
Csa3G839790	720	2.03	6.39	1.65433620376182	0.00021932	0.000631737662030186	Up	NA	NA	NA	K01227//mannosyl-glycoprotein endo-beta-N-acetylglucosaminidase [EC:3.2.1.96];K13944	gi|700204568|gb|KGN59701.1|//hypothetical protein Csa_3G839790 [Cucumis sativus]
Csa6G363530	579	3.64	11.45	1.65333724278561	2.47404e-05	8.12684148498144e-05	Up	NA	NA	NA	NA	gi|778715279|ref|XP_011657373.1|//PREDICTED: uncharacterized protein LOC105435852 [Cucumis sativus]
Csa7G428890	1784	34.36	108.01	1.65236294748988	6.20962e-126	3.46350896618911e-124	Up	NA	GO:0046983//protein dimerization activity	NA	K16189//phytochrome-interacting factor 4;K11253//histone H3;K12126//phytochrome-interacting factor 3	gi|778728699|ref|XP_011659462.1|//PREDICTED: transcription factor bHLH130 isoform X3 [Cucumis sativus];gi|778728696|ref|XP_011659461.1|//PREDICTED: transcription factor bHLH130 isoform X2 [Cucumis sativus];gi|778728688|ref|XP_011659459.1|//PREDICTED: transcription factor bHLH130 isoform X1 [Cucumis sativus]
Csa1G002860	1932	13.87	43.49	1.64871592114047	1.108296e-56	2.55617179336493e-55	Up	NA	GO:0004674//protein serine/threonine kinase activity;GO:0032559//adenyl ribonucleotide binding;GO:0004871//signal transducer activity	GO:0006464//cellular protein modification process	K04733//interleukin-1 receptor-associated kinase 4 [EC:2.7.11.1];K04730//interleukin-1 receptor-associated kinase 1 [EC:2.7.11.1]	gi|449440606|ref|XP_004138075.1|//PREDICTED: leucine-rich repeat receptor-like serine/threonine/tyrosine-protein kinase SOBIR1 [Cucumis sativus]
Csa4G618460	582	8.15	25.51	1.64619093448403	2.48444e-10	1.3042639978425e-09	Up	NA	NA	NA	NA	gi|778695480|ref|XP_011654003.1|//PREDICTED: VQ motif-containing protein 22-like [Cucumis sativus]
Csa3G435010	1590	19.13	59.73	1.64261884809555	5.70456e-63	1.47079423788079e-61	Up	NA	NA	NA	K00850//6-phosphofructokinase 1 [EC:2.7.1.11]	gi|778681260|ref|XP_011651478.1|//PREDICTED: ATP-dependent 6-phosphofructokinase 6-like [Cucumis sativus]
Csa6G501980	813	26.33	82.04	1.63961997043379	1.174688e-42	2.07499787731397e-41	Up	NA	NA	NA	K03809//NAD(P)H dehydrogenase (quinone) [EC:1.6.5.2]	gi|449451499|ref|XP_004143499.1|//PREDICTED: probable NAD(P)H dehydrogenase (quinone) FQR1-like 2 [Cucumis sativus]
Csa4G431960	495	12.49	38.87	1.63788363073124	1.281596e-12	7.86492677679697e-12	Up	NA	NA	NA	NA	gi|778694743|ref|XP_011653858.1|//PREDICTED: sigma factor binding protein 2, chloroplastic-like [Cucumis sativus]
Csa6G484580	657	15.05	46.75	1.6352028780153	5.63054e-20	5.03463902802021e-19	Up	NA	NA	NA	K19040//E3 ubiquitin-protein ligase ATL10/75/76/77/78 [EC:2.3.2.27]	gi|449461825|ref|XP_004148642.1|//PREDICTED: RING-H2 finger protein ATL78-like [Cucumis sativus]
Csa2G023850	1913	0.85	2.64	1.63500318322075	3.71368e-05	0.000119488421289256	Up	NA	GO:0016702//oxidoreductase activity, acting on single donors with incorporation of molecular oxygen, incorporation of two atoms of oxygen;GO:0046872//metal ion binding	GO:0006633//fatty acid biosynthetic process;GO:0055114//oxidation-reduction process;GO:0031408//oxylipin biosynthetic process	K15718//linoleate 9S-lipoxygenase [EC:1.13.11.58]	gi|700205799|gb|KGN60918.1|//hypothetical protein Csa_2G023850 [Cucumis sativus];gi|449442807|ref|XP_004139172.1|//PREDICTED: probable linoleate 9S-lipoxygenase 5 [Cucumis sativus]
Csa2G406070	336	16.62	51.57	1.63361166342887	1.169982e-10	6.29140044530387e-10	Up	NA	NA	NA	NA	gi|700208038|gb|KGN63157.1|//hypothetical protein Csa_2G406070 [Cucumis sativus]
Csa1G076100	933	6.92	21.45	1.63213370475018	6.1303e-14	4.0534109986413e-13	Up	NA	NA	NA	NA	gi|778658830|ref|XP_011653355.1|//PREDICTED: NAC domain-containing protein 8-like [Cucumis sativus]
Csa7G420160	1036	5.21	16.14	1.63128530099927	1.476324e-16	1.12302160937866e-15	Up	NA	GO:0004674//protein serine/threonine kinase activity;GO:0005524//ATP binding;GO:0032559//adenyl ribonucleotide binding;GO:0004702//receptor signaling protein serine/threonine kinase activity	GO:0006464//cellular protein modification process;GO:0006468//protein phosphorylation	K13436//pto-interacting protein 1 [EC:2.7.11.1]	gi|778728406|ref|XP_011659415.1|//PREDICTED: probable receptor-like protein kinase At2g47060 [Cucumis sativus]
Csa2G024440	2769	62.27	192.90	1.63124395905919	0	0	Up	NA	GO:0016702//oxidoreductase activity, acting on single donors with incorporation of molecular oxygen, incorporation of two atoms of oxygen;GO:0046872//metal ion binding;GO:0046914//transition metal ion binding	GO:0006633//fatty acid biosynthetic process;GO:0055114//oxidation-reduction process;GO:0031408//oxylipin biosynthetic process	K15718//linoleate 9S-lipoxygenase [EC:1.13.11.58]	gi|793422123|ref|NP_001292695.1|//linoleate 9S-lipoxygenase 6-like [Cucumis sativus];gi|700205809|gb|KGN60928.1|//hypothetical protein Csa_2G024440 [Cucumis sativus]
Csa6G109740	1395	3.55	10.99	1.63030045655719	3.01304e-11	1.6897676934601e-10	Up	NA	NA	NA	K12338//anthocyanidin 3-O-glucoside 5-O-glucosyltransferase [EC:2.4.1.298]	gi|778712288|ref|XP_004140604.2|//PREDICTED: crocetin glucosyltransferase, chloroplastic-like [Cucumis sativus]
Csa1G045670	1566	25.49	78.90	1.63009392687862	1.940184e-80	6.50045124681583e-79	Up	NA	NA	NA	K08900//mitochondrial chaperone BCS1	gi|449469482|ref|XP_004152449.1|//PREDICTED: putative cell division cycle ATPase [Cucumis sativus]
Csa2G176690	321	37.38	115.53	1.62792905477298	7.54274e-21	7.02521420287081e-20	Up	NA	NA	NA	NA	gi|700206487|gb|KGN61606.1|//hypothetical protein Csa_2G176690 [Cucumis sativus]
Csa2G428380	882	17.14	52.92	1.62644595216618	3.12214e-30	3.98789876902887e-29	Up	NA	GO:0003677//DNA binding;GO:0001071//nucleic acid binding transcription factor activity	GO:0010467//gene expression	K13425//WRKY transcription factor 22;K13424//WRKY transcription factor 33	gi|525507250|ref|NP_001267663.1|//probable WRKY transcription factor 15-like [Cucumis sativus]
Csa5G611100	1458	37.72	116.24	1.62370502695774	1.154546e-108	5.46822200389294e-107	Up	NA	NA	NA	K03327//multidrug resistance protein, MATE family	gi|449434574|ref|XP_004135071.1|//PREDICTED: MATE efflux family protein 7-like [Cucumis sativus]
Csa5G366670	753	2.39	7.36	1.62269514807626	0.0001125476	0.000338721642176871	Up	GO:0009536//plastid	GO:0009975//cyclase activity	NA	K10525//allene oxide cyclase [EC:5.3.99.6]	gi|449445152|ref|XP_004140337.1|//PREDICTED: allene oxide cyclase 3, chloroplastic [Cucumis sativus]
Csa5G080790	1239	9.65	29.71	1.62234775767997	1.676e-24	1.80647929125138e-23	Up	GO:0044424//intracellular part	GO:0032559//adenyl ribonucleotide binding;GO:0004812//aminoacyl-tRNA ligase activity	GO:0006418//tRNA aminoacylation for protein translation	K01868//threonyl-tRNA synthetase [EC:6.1.1.3]	gi|700194536|gb|KGN49713.1|//hypothetical protein Csa_5G080790 [Cucumis sativus]
Csa3G598900	1587	4.81	14.79	1.62051325332903	1.92809e-16	1.46096535383418e-15	Up	NA	NA	NA	K16190//glucuronokinase [EC:2.7.1.43];K13422//transcription factor MYC2	gi|778681821|ref|XP_011651587.1|//PREDICTED: transcription factor ICE1 [Cucumis sativus]
Csa5G517750	570	4.17	12.82	1.62027697317408	1.27932e-05	4.33778838529873e-05	Up	NA	NA	NA	NA	gi|778703495|ref|XP_011655376.1|//PREDICTED: uncharacterized protein LOC105435520 [Cucumis sativus]
Csa3G566330	1242	50.21	153.68	1.61388279399766	1.648262e-99	7.16184555625e-98	Up	NA	GO:0003824//catalytic activity	GO:0008152//metabolic process	K02934//large subunit ribosomal protein L6e;K00065;K10256//omega-6 fatty acid desaturase / acyl-lipid omega-6 desaturase (Delta-12 desaturase) [EC:1.14.19.6 1.14.19.22];K13237//peroxisomal 2,4-dienoyl-CoA reductase [EC:1.3.1.34];K09841//xanthoxin dehydrogenase [EC:1.1.1.288]	gi|778681622|ref|XP_011651549.1|//PREDICTED: carbonyl reductase [NADPH] 2 [Cucumis sativus]
Csa7G072740	1419	2.88	8.79	1.60979435370109	2.79186e-09	1.35797967916042e-08	Up	NA	GO:0016740//transferase activity	NA	K08236//limonoid glucosyltransferase [EC:2.4.1.210];K13068//sinapate 1-glucosyltransferase [EC:2.4.1.120]	gi|449438647|ref|XP_004137099.1|//PREDICTED: limonoid UDP-glucosyltransferase-like [Cucumis sativus]
Csa2G354820	693	9.16	27.95	1.60942877963361	6.04478e-13	3.79450781941309e-12	Up	NA	NA	NA	NA	gi|700207337|gb|KGN62456.1|//hypothetical protein Csa_2G354820 [Cucumis sativus]
Csa2G370580	861	10.79	32.86	1.60663761546206	1.394802e-18	1.15684770907542e-17	Up	NA	NA	NA	K07374//tubulin alpha	gi|449461381|ref|XP_004148420.1|//PREDICTED: AT-hook motif nuclear-localized protein 17 [Cucumis sativus]
BGI_novel_G000013	4050	4.64	14.13	1.60656475520637	2.13646e-38	3.3866718534202e-37	Up	GO:0016021//integral component of membrane	GO:0000287//magnesium ion binding;GO:0005524//ATP binding;GO:0004012//phospholipid-translocating ATPase activity	GO:0045332//phospholipid translocation	K01530//phospholipid-translocating ATPase [EC:3.6.3.1]	gi|778657179|ref|XP_004137458.2|//PREDICTED: putative phospholipid-transporting ATPase 9 [Cucumis sativus]
Csa4G332090	2070	6.55	19.93	1.60537489841425	1.029138e-27	1.22228189798658e-26	Up	NA	NA	NA	K08332//vacuolar protein 8	gi|449466526|ref|XP_004150977.1|//PREDICTED: U-box domain-containing protein 16 [Cucumis sativus]
Csa6G133710	2136	96.00	291.86	1.60417018918481	0	0	Up	NA	GO:0016709//oxidoreductase activity, acting on paired donors, with incorporation or reduction of molecular oxygen, NAD(P)H as one donor, and incorporation of one atom of oxygen;GO:0020037//heme binding;GO:0005506//iron ion binding;GO:0016710//trans-cinnamate 4-monooxygenase activity	GO:0008152//metabolic process;GO:0055114//oxidation-reduction process	K00487//trans-cinnamate 4-monooxygenase [EC:1.14.13.11]	gi|700191558|gb|KGN46762.1|//hypothetical protein Csa_6G133710 [Cucumis sativus];gi|793422639|ref|NP_001292707.1|//trans-cinnamate 4-monooxygenase [Cucumis sativus]
Csa1G025180	255	48.56	147.48	1.60267899483814	2.43658e-19	2.09962223461709e-18	Up	NA	NA	NA	K06972//presequence protease [EC:3.4.24.-]	gi|700208790|gb|KGN63886.1|//hypothetical protein Csa_1G025180 [Cucumis sativus]
Csa1G033140	705	3.60	10.93	1.60222458934223	4.8911e-06	1.73424685974499e-05	Up	NA	NA	NA	K00799//glutathione S-transferase [EC:2.5.1.18]	gi|778656832|ref|XP_011649756.1|//PREDICTED: glutathione S-transferase U9-like [Cucumis sativus]
Csa6G187970	1827	18.78	56.98	1.60125855867008	7.9347e-67	2.16933806460674e-65	Up	GO:0031224//intrinsic component of membrane	NA	GO:0015833//peptide transport	K14638//solute carrier family 15 (peptide/histidine transporter), member 3/4	gi|700191900|gb|KGN47104.1|//hypothetical protein Csa_6G187970 [Cucumis sativus]
Csa3G304140	1058	233.12	706.87	1.60037213181185	0	0	Up	NA	GO:0016211//ammonia ligase activity;GO:0032559//adenyl ribonucleotide binding	GO:0006541//glutamine metabolic process	K01915//glutamine synthetase [EC:6.3.1.2]	gi|525507210|ref|NP_001267644.1|//glutamine synthetase cytosolic isozyme-like [Cucumis sativus]
Csa5G590160	4386	3.65	11.05	1.59807800051141	1.113256e-32	1.53474796713881e-31	Up	GO:0031224//intrinsic component of membrane	GO:0015405//P-P-bond-hydrolysis-driven transmembrane transporter activity;GO:0032559//adenyl ribonucleotide binding;GO:0016628//oxidoreductase activity, acting on the CH-CH group of donors, NAD or NADP as acceptor;GO:0017111//nucleoside-triphosphatase activity	GO:0006810//transport;GO:0009207//purine ribonucleoside triphosphate catabolic process	K05665//ATP-binding cassette, subfamily C (CFTR/MRP), member 1	gi|778704735|ref|XP_004135511.2|//PREDICTED: putative ABC transporter C family member 15 [Cucumis sativus]
Csa7G043020	1578	9.68	29.29	1.59732924060477	2.69886e-30	3.45859175510204e-29	Up	NA	NA	NA	K13424//WRKY transcription factor 33	gi|778723759|ref|XP_011658698.1|//PREDICTED: probable WRKY transcription factor 31 [Cucumis sativus]
BGI_novel_G000246	2013	1.94	5.87	1.59730385092292	7.17498e-09	3.36793249770919e-08	Up	NA	NA	NA	K14297//nuclear pore complex protein Nup98-Nup96;K12173//BRCA1-A complex subunit BRE	gi|778694700|ref|XP_004144327.2|//PREDICTED: protein P21-like [Cucumis sativus]
Csa3G824920	3408	0.78	2.36	1.59724083049959	1.484078e-06	5.56629332331406e-06	Up	NA	NA	NA	K19613//leucine-rich repeat protein SHOC2	gi|778688906|ref|XP_011652862.1|//PREDICTED: TMV resistance protein N-like [Cucumis sativus]
Csa3G645940	630	19.50	58.99	1.59699628519163	5.49882e-23	5.60712572655841e-22	Up	NA	NA	NA	K13464//jasmonate ZIM domain-containing protein	gi|449453375|ref|XP_004144433.1|//PREDICTED: protein TIFY 11A [Cucumis sativus]
Csa5G100000	1305	6.71	20.27	1.59496141726672	6.68776e-18	5.39958258647864e-17	Up	NA	GO:0016831//carboxy-lyase activity;GO:0048037//cofactor binding	GO:0009064//glutamine family amino acid metabolic process	K01580//glutamate decarboxylase [EC:4.1.1.15]	gi|700194572|gb|KGN49749.1|//Glutamate decarboxylase [Cucumis sativus]
Csa7G373520	1033	11.14	33.63	1.59399954618655	1.409684e-20	1.29805623197729e-19	Up	GO:0016021//integral component of membrane	GO:0005524//ATP binding;GO:0004672//protein kinase activity	GO:0006468//protein phosphorylation	K04730//interleukin-1 receptor-associated kinase 1 [EC:2.7.11.1];K13415//protein brassinosteroid insensitive 1 [EC:2.7.10.1 2.7.11.1]	gi|778727270|ref|XP_004148961.2|//PREDICTED: probably inactive leucine-rich repeat receptor-like protein kinase At5g48380 [Cucumis sativus]
Csa4G290150	2401	4.62	13.92	1.59119445443267	1.86027e-20	1.70089318083607e-19	Up	NA	NA	NA	K04733//interleukin-1 receptor-associated kinase 4 [EC:2.7.11.1];K00276//primary-amine oxidase [EC:1.4.3.21]	gi|778693119|ref|XP_011653581.1|//PREDICTED: G-type lectin S-receptor-like serine/threonine-protein kinase RLK1 [Cucumis sativus];gi|700198990|gb|KGN54148.1|//hypothetical protein Csa_4G290150 [Cucumis sativus]
Csa6G355960	1734	3.96	11.93	1.59102170761562	2.30806e-14	1.56600543604043e-13	Up	NA	NA	NA	NA	gi|449453089|ref|XP_004144291.1|//PREDICTED: UPF0392 protein At1g27200 [Cucumis sativus]
Csa4G056840	5354	1.97	5.93	1.58983647508963	6.31766e-21	5.89547313326942e-20	Up	NA	GO:0016769//transferase activity, transferring nitrogenous groups;GO:0008483//transaminase activity;GO:0048037//cofactor binding;GO:0030170//pyridoxal phosphate binding	NA	K16871//4-aminobutyrate---pyruvate transaminase [EC:2.6.1.96]	gi|449460080|ref|XP_004147774.1|//PREDICTED: gamma aminobutyrate transaminase 2-like [Cucumis sativus]
Csa7G449420	2724	12.24	36.83	1.58927783920709	1.202564e-64	3.16339335459459e-63	Up	NA	NA	NA	K00454//lipoxygenase [EC:1.13.11.12]	gi|449447902|ref|XP_004141705.1|//PREDICTED: linoleate 13S-lipoxygenase 3-1, chloroplastic-like [Cucumis sativus]
Csa1G042490	2908	1.68	5.04	1.58496250072116	1.449758e-11	8.32968985478158e-11	Up	GO:0016021//integral component of membrane	GO:0004674//protein serine/threonine kinase activity;GO:0005524//ATP binding;GO:0030247//polysaccharide binding	GO:0006468//protein phosphorylation	K04730//interleukin-1 receptor-associated kinase 1 [EC:2.7.11.1]	gi|778657273|ref|XP_011650581.1|//PREDICTED: probable receptor-like protein kinase At1g67000 [Cucumis sativus];gi|700209041|gb|KGN64137.1|//hypothetical protein Csa_1G042490 [Cucumis sativus]
Csa6G040580	1251	2.49	7.45	1.58109468328144	4.50542e-07	1.77895549127789e-06	Up	NA	NA	NA	K00889//1-phosphatidylinositol-4-phosphate 5-kinase [EC:2.7.1.68]	gi|778710148|ref|XP_004140865.2|//PREDICTED: MORN repeat-containing protein 1-like [Cucumis sativus]
Csa7G049260	876	16.10	48.09	1.57867623787372	2.64516e-26	3.01467708196721e-25	Up	NA	GO:0016791//phosphatase activity	NA	K17506//protein phosphatase 1L [EC:3.1.3.16]	gi|449438129|ref|XP_004136842.1|//PREDICTED: probable protein phosphatase 2C 58 [Cucumis sativus]
Csa1G073890	1794	2.67	7.97	1.57773998230292	2.66116e-10	1.39215642461704e-09	Up	NA	NA	NA	K04730//interleukin-1 receptor-associated kinase 1 [EC:2.7.11.1]	gi|700209586|gb|KGN64682.1|//hypothetical protein Csa_1G073890 [Cucumis sativus]
CsaUNG031640	954	13.64	40.69	1.57683063604954	1.70212e-24	1.83260331415929e-23	Up	NA	NA	NA	K09287//RAV-like factor	gi|449466693|ref|XP_004151060.1|//PREDICTED: AP2/ERF and B3 domain-containing transcription factor RAV1-like [Cucumis sativus]
Csa1G023060	735	15.95	47.47	1.5734596257772	1.321822e-21	1.26564619045745e-20	Up	NA	NA	NA	NA	gi|449440939|ref|XP_004138241.1|//PREDICTED: LOB domain-containing protein 41-like [Cucumis sativus]
Csa5G139250	318	27.66	82.28	1.57274063737444	1.433624e-14	9.84024146121298e-14	Up	NA	NA	NA	NA	gi|449456413|ref|XP_004145944.1|//PREDICTED: protein yippee-like At4g27740 [Cucumis sativus]
Csa4G038810	1218	11.76	34.95	1.57140439542643	4.93646e-27	5.72323587611674e-26	Up	NA	NA	NA	K12309//beta-galactosidase [EC:3.2.1.23]	gi|449462892|ref|XP_004149169.1|//PREDICTED: protein indeterminate-domain 1-like [Cucumis sativus]
Csa5G512900	717	4.50	13.37	1.57100255887632	6.79588e-07	2.63996408062263e-06	Up	NA	NA	NA	K18880//very-long-chain (3R)-3-hydroxyacyl-CoA dehydratase [EC:4.2.1.134]	gi|449449978|ref|XP_004142741.1|//PREDICTED: methylglutaconyl-CoA hydratase, mitochondrial [Cucumis sativus]
BGI_novel_G000358	1805	1.98	5.88	1.57031572475675	8.03602e-08	3.43422975455543e-07	Up	NA	NA	NA	K03847//alpha-1,6-mannosyltransferase [EC:2.4.1.260]	gi|645252998|ref|XP_008232378.1|//PREDICTED: dol-P-Man:Man(7)GlcNAc(2)-PP-Dol alpha-1,6-mannosyltransferase [Prunus mume]
Csa5G623470	2250	297.91	884.37	1.56977353461791	0	0	Up	GO:0016021//integral component of membrane	GO:0005516//calmodulin binding	GO:0006952//defense response;GO:0009607//response to biotic stimulus	K08472//mlo protein	gi|449449280|ref|XP_004142393.1|//PREDICTED: MLO-like protein 2 [Cucumis sativus]
Csa3G822320	282	27.46	81.48	1.56911435481879	2.12722e-12	1.28757663308458e-11	Up	NA	NA	NA	NA	gi|700204348|gb|KGN59481.1|//hypothetical protein Csa_3G822320 [Cucumis sativus]
Csa3G893950	2946	19.64	58.25	1.56846312011431	1.878458e-107	8.70620557809524e-106	Up	GO:0016020//membrane	GO:0000166//nucleotide binding;GO:0004672//protein kinase activity;GO:0004871//signal transducer activity;GO:0016491//oxidoreductase activity	GO:0008152//metabolic process	K00924	gi|449437264|ref|XP_004136412.1|//PREDICTED: receptor-like protein kinase HAIKU2 [Cucumis sativus]
Csa3G824990	861	7.09	21.02	1.56790513672266	5.22068e-12	3.07956839030303e-11	Up	NA	NA	NA	K00162//pyruvate dehydrogenase E1 component beta subunit [EC:1.2.4.1];K13126//polyadenylate-binding protein;K05941//glutathione gamma-glutamylcysteinyltransferase [EC:2.3.2.15]	gi|449437840|ref|XP_004136698.1|//PREDICTED: NAC domain-containing protein 100 isoform X1 [Cucumis sativus]
Csa2G072990	1884	4.09	12.12	1.5672169505312	1.989522e-15	1.43224982440828e-14	Up	NA	GO:0004553//hydrolase activity, hydrolyzing O-glycosyl compounds	GO:0008152//metabolic process	K01179//endoglucanase [EC:3.2.1.4];K08472//mlo protein	gi|449470269|ref|XP_004152840.1|//PREDICTED: endoglucanase 7 [Cucumis sativus]
Csa7G184660	2268	39.41	116.46	1.56320086929699	2.6969e-162	2.01141208429119e-160	Up	NA	GO:0032559//adenyl ribonucleotide binding;GO:0016462//pyrophosphatase activity	GO:0043170//macromolecule metabolic process	K03696//ATP-dependent Clp protease ATP-binding subunit ClpC	gi|778725486|ref|XP_011658949.1|//PREDICTED: chaperone protein ClpD, chloroplastic [Cucumis sativus]
Csa6G538660	1893	8.99	26.50	1.55959933882348	6.2793e-32	8.43566968944099e-31	Up	NA	GO:0046872//metal ion binding	NA	NA	gi|449433467|ref|XP_004134519.1|//PREDICTED: vacuolar-sorting receptor 6 [Cucumis sativus]
Csa5G583370	2642	25.20	74.16	1.55721751023825	6.208e-106	2.83673539906103e-104	Up	GO:0016021//integral component of membrane	GO:0016705//oxidoreductase activity, acting on paired donors, with incorporation or reduction of molecular oxygen;GO:0020037//heme binding;GO:0005506//iron ion binding;GO:0004497//monooxygenase activity	GO:0055114//oxidation-reduction process	K07428//cytochrome P450, family 4, subfamily X [EC:1.14.14.1];K10717//cytokinin trans-hydroxylase;K15639//PHYB activation tagged suppressor 1 [EC:1.14.-.-];K00512//steroid 17alpha-monooxygenase / 17alpha-hydroxyprogesterone aldolase [EC:1.14.14.19 4.1.2.30];K07408//cytochrome P450, family 1, subfamily A, polypeptide 1 [EC:1.14.14.1]	gi|449458696|ref|XP_004147083.1|//PREDICTED: cytochrome P450 714C3-like isoform X2 [Cucumis sativus];gi|778704391|ref|XP_011655532.1|//PREDICTED: tabersonine 16-hydroxylase-like isoform X1 [Cucumis sativus]
Csa1G042510	5602	0.65	1.91	1.55506101500729	4.7194e-08	2.06537410971223e-07	Up	GO:0016020//membrane	GO:0000166//nucleotide binding;GO:0004672//protein kinase activity	NA	K04733//interleukin-1 receptor-associated kinase 4 [EC:2.7.11.1];K04730//interleukin-1 receptor-associated kinase 1 [EC:2.7.11.1]	gi|700209044|gb|KGN64140.1|//hypothetical protein Csa_1G042510 [Cucumis sativus]
Csa3G002390	1167	16.48	48.33	1.55220275224451	1.284602e-34	1.86057012886905e-33	Up	NA	NA	NA	K01757//strictosidine synthase [EC:4.3.3.2]	gi|778674645|ref|XP_011650265.1|//PREDICTED: protein STRICTOSIDINE SYNTHASE-LIKE 4-like [Cucumis sativus]
Csa6G327430	981	8.87	25.98	1.55039542114682	2.87318e-16	2.15444229121726e-15	Up	NA	NA	NA	K18835//WRKY transcription factor 2;K13424//WRKY transcription factor 33	gi|778714810|ref|XP_011657294.1|//PREDICTED: probable WRKY transcription factor 48 [Cucumis sativus]
Csa1G240590	876	3.92	11.48	1.55019708256048	3.50806e-07	1.39905543863962e-06	Up	GO:0043231//intracellular membrane-bounded organelle	GO:0003677//DNA binding;GO:0001071//nucleic acid binding transcription factor activity	GO:0006351//transcription, DNA-templated	K09419//heat shock transcription factor, other eukaryote	gi|449465338|ref|XP_004150385.1|//PREDICTED: heat stress transcription factor C-1-like [Cucumis sativus]
Csa2G360800	885	5.60	16.38	1.54843662469604	8.99142e-10	4.54379495638629e-09	Up	NA	NA	NA	NA	gi|778671219|ref|XP_011649594.1|//PREDICTED: uncharacterized protein LOC101218655 isoform X1 [Cucumis sativus]
Csa1G042280	315	10.60	30.98	1.54727287933901	4.4765e-06	1.5936274506218e-05	Up	NA	NA	NA	NA	gi|700209020|gb|KGN64116.1|//hypothetical protein Csa_1G042280 [Cucumis sativus]
Csa3G135670	459	5.32	15.53	1.54555967888611	4.43272e-05	0.000141130728688256	Up	NA	NA	NA	NA	gi|449432568|ref|XP_004134071.1|//PREDICTED: CASP-like protein 5B3 [Cucumis sativus]
Csa7G259370	225	20.45	59.49	1.54054633512089	4.0276e-07	1.59546726902727e-06	Up	NA	NA	NA	NA	gi|700189104|gb|KGN44337.1|//hypothetical protein Csa_7G259370 [Cucumis sativus]
Csa7G238400	384	5.45	15.85	1.54015470536248	0.000227378	0.000653787318759232	Up	NA	NA	GO:0009725//response to hormone	K14488//SAUR family protein	gi|449444132|ref|XP_004139829.1|//PREDICTED: uncharacterized protein LOC101213583 [Cucumis sativus]
Csa6G487750	1920	4.21	12.20	1.53498900938385	2.05796e-15	1.47932974002954e-14	Up	NA	GO:0016301//kinase activity	NA	K04733//interleukin-1 receptor-associated kinase 4 [EC:2.7.11.1];K04730//interleukin-1 receptor-associated kinase 1 [EC:2.7.11.1]	gi|449448550|ref|XP_004142029.1|//PREDICTED: lysM domain receptor-like kinase 4 [Cucumis sativus]
Csa1G569470	858	5.34	15.45	1.53269519110418	6.56918e-09	3.09476422749274e-08	Up	NA	NA	NA	NA	gi|778662469|ref|XP_011659891.1|//PREDICTED: ribonucleoprotein RB97D-like isoform X2 [Cucumis sativus]
Csa6G446380	2093	5.60	16.16	1.52892846580683	3.11582e-21	2.94572861194755e-20	Up	NA	NA	NA	K13717//OTU domain-containing protein 3 [EC:3.4.19.12];K16743//abnormal spindle-like microcephaly-associated protein	gi|659125006|ref|XP_008462460.1|//PREDICTED: uncharacterized protein LOC103500810 isoform X1 [Cucumis melo];gi|700192973|gb|KGN48177.1|//hypothetical protein Csa_6G446380 [Cucumis sativus]
Csa6G518190	396	11.58	33.39	1.52778084007388	4.80328e-08	2.09972262474736e-07	Up	NA	NA	NA	K03676//glutaredoxin 3	gi|566006109|ref|NP_001274395.1|//glutaredoxin [Cucumis sativus]
BGI_novel_G000385	784	2.45	7.05	1.52484150828359	0.000227378	0.000653883904269464	Up	NA	NA	NA	NA	gi|700192405|gb|KGN47609.1|//hypothetical protein Csa_6G364115 [Cucumis sativus]
Csa3G064180	1262	2.99	8.60	1.52419117539136	1.368408e-05	4.62214647371161e-05	Up	GO:0016021//integral component of membrane	NA	GO:0016192//vesicle-mediated transport	K08503//syntaxin of plants SYP5	gi|700200936|gb|KGN56069.1|//hypothetical protein Csa_3G064180 [Cucumis sativus];gi|449463737|ref|XP_004149588.1|//PREDICTED: syntaxin-52-like [Cucumis sativus]
Csa4G290190	2114	4.07	11.69	1.52217423026541	6.67164e-15	4.65484387956989e-14	Up	NA	GO:0003677//DNA binding	NA	K17046//protein DEK	gi|449448952|ref|XP_004142229.1|//PREDICTED: bromodomain-containing protein DDB_G0270170 isoform X1 [Cucumis sativus]
Csa3G101810	891	81.63	233.92	1.5188438539816	6.40584e-117	3.26429532565445e-115	Up	NA	NA	NA	K02437//glycine cleavage system H protein;K00162//pyruvate dehydrogenase E1 component beta subunit [EC:1.2.4.1];K13126//polyadenylate-binding protein;K05941//glutathione gamma-glutamylcysteinyltransferase [EC:2.3.2.15]	gi|449431824|ref|XP_004133700.1|//PREDICTED: NAC domain-containing protein 72-like [Cucumis sativus]
Csa1G532340	2691	11.00	31.42	1.51417965688217	7.65122e-53	1.65855956035635e-51	Up	NA	NA	NA	K03549//KUP system potassium uptake protein	gi|700210730|gb|KGN65826.1|//hypothetical protein Csa_1G532340 [Cucumis sativus];gi|778661761|ref|XP_011658682.1|//PREDICTED: potassium transporter 1 isoform X4 [Cucumis sativus];gi|778661755|ref|XP_011658676.1|//PREDICTED: potassium transporter 1 isoform X2 [Cucumis sativus]
Csa3G630280	1584	3.27	9.34	1.51413191421158	1.862472e-06	6.91227453803623e-06	Up	GO:0005634//nucleus	GO:0003677//DNA binding;GO:0003700//transcription factor activity, sequence-specific DNA binding	GO:0006355//regulation of transcription, DNA-templated;GO:0007275//multicellular organism development	NA	gi|778682164|ref|XP_011651656.1|//PREDICTED: ethylene-responsive transcription factor-like protein At4g13040 isoform X1 [Cucumis sativus]
Csa3G603030	2296	28.67	81.82	1.51291163264752	2.73546e-113	1.35148386700508e-111	Up	GO:0009536//plastid	GO:0032559//adenyl ribonucleotide binding;GO:0016301//kinase activity	GO:0006464//cellular protein modification process	K02206//cyclin-dependent kinase 2 [EC:2.7.11.22];K08818//cell division cycle 2-like [EC:2.7.11.22]	gi|700203132|gb|KGN58265.1|//hypothetical protein Csa_3G603030 [Cucumis sativus];gi|449455940|ref|XP_004145708.1|//PREDICTED: probable plastid-lipid-associated protein 14, chloroplastic [Cucumis sativus]
Csa1G596520	1071	235.93	672.78	1.51177594056678	0	0	Up	NA	GO:0004175//endopeptidase activity	GO:0019538//protein metabolic process	K01366//cathepsin H [EC:3.4.22.16]	gi|449452572|ref|XP_004144033.1|//PREDICTED: thiol protease aleurain-like [Cucumis sativus]
Csa3G881860	687	20.94	59.65	1.51026069565178	1.512408e-23	1.58027558389694e-22	Up	NA	NA	NA	NA	gi|778687234|ref|XP_004136309.2|//PREDICTED: uncharacterized protein LOC101218277 [Cucumis sativus]
Csa6G517180	945	22.88	65.07	1.50790550161504	1.544366e-35	2.28613144912548e-34	Up	NA	NA	NA	K08726//soluble epoxide hydrolase / lipid-phosphate phosphatase [EC:3.3.2.10 3.1.3.76]	gi|449433871|ref|XP_004134720.1|//PREDICTED: bifunctional epoxide hydrolase 2-like [Cucumis sativus]
Csa6G014830	870	183.55	521.17	1.50558092630495	3.2525e-248	3.90822006172839e-246	Up	NA	NA	NA	NA	gi|449441220|ref|XP_004138380.1|//PREDICTED: glycine-rich cell wall structural protein 1.8-like [Cucumis sativus]
Csa1G425940	726	25.76	73.07	1.50414661389048	5.0287e-30	6.40213696533682e-29	Up	NA	NA	NA	K13422//transcription factor MYC2	gi|449457201|ref|XP_004146337.1|//PREDICTED: transcription factor bHLH35-like [Cucumis sativus]
Csa5G633290	1416	4.46	12.65	1.50402176966137	1.182966e-11	6.83312052106825e-11	Up	NA	NA	NA	K08900//mitochondrial chaperone BCS1	gi|449461949|ref|XP_004148704.1|//PREDICTED: mitochondrial chaperone BCS1-like [Cucumis sativus]
Csa1G528590	2075	2.70	7.62	1.49683159044249	3.4266e-16	2.55858057537399e-15	Up	GO:0009570//chloroplast stroma	GO:0080041//ADP-ribose pyrophosphohydrolase activity;GO:0051536//iron-sulfur cluster binding	GO:0009228//thiamine biosynthetic process	K03147//phosphomethylpyrimidine synthase [EC:4.1.99.17]	gi|778661672|ref|XP_011658531.1|//PREDICTED: phosphomethylpyrimidine synthase, chloroplastic isoform X3 [Cucumis sativus]
Csa7G270590	3879	3.19	8.99	1.49476469174958	4.42866e-22	4.34298718186398e-21	Up	NA	NA	NA	K18730//PERQ amino acid-rich with GYF domain-containing protein	gi|700189132|gb|KGN44365.1|//hypothetical protein Csa_7G270590 [Cucumis sativus]
Csa6G343690	756	66.69	187.40	1.4905785987984	5.48284e-77	1.74393731111111e-75	Up	GO:0031224//intrinsic component of membrane	NA	GO:0071702//organic substance transport	K15382//solute carrier family 50 (sugar transporter)	gi|449466016|ref|XP_004150723.1|//PREDICTED: bidirectional sugar transporter SWEET1 [Cucumis sativus]
Csa2G352410	819	3.57	10.02	1.48888652916611	7.92144e-07	3.05646681942517e-06	Up	GO:0043231//intracellular membrane-bounded organelle	GO:0003677//DNA binding;GO:0003676//nucleic acid binding	NA	K09422//myb proto-oncogene protein, plant	gi|449450324|ref|XP_004142913.1|//PREDICTED: transcription factor RAX3 [Cucumis sativus]
Csa6G014490	1737	9.82	27.56	1.4887809583896	1.662602e-28	2.02656296380714e-27	Up	NA	NA	NA	K06901//putative MFS transporter, AGZA family, xanthine/uracil permease	gi|449441564|ref|XP_004138552.1|//PREDICTED: adenine/guanine permease AZG1 [Cucumis sativus]
Csa1G570120	1293	1.44	4.03	1.48471102708566	0.000341364	0.000954328827229642	Up	NA	NA	NA	K02433//aspartyl-tRNA(Asn)/glutamyl-tRNA(Gln) amidotransferase subunit A [EC:6.3.5.6 6.3.5.7]	gi|449435685|ref|XP_004135625.1|//PREDICTED: amidase 1-like [Cucumis sativus]
Csa3G778290	822	2.95	8.25	1.48367916488397	5.77728e-05	0.000180775650988587	Up	NA	NA	NA	K13070//momilactone-A synthase [EC:1.1.1.295];K09841//xanthoxin dehydrogenase [EC:1.1.1.288]	gi|449437438|ref|XP_004136499.1|//PREDICTED: tropinone reductase-like 1 [Cucumis sativus]
Csa3G912320	1101	7.85	21.95	1.48345638064373	9.99332e-15	6.90802440056818e-14	Up	NA	GO:0032559//adenyl ribonucleotide binding;GO:0004672//protein kinase activity	GO:0006464//cellular protein modification process	K00924	gi|449461283|ref|XP_004148371.1|//PREDICTED: probable receptor-like protein kinase At5g47070 [Cucumis sativus]
Csa7G063920	813	6.37	17.80	1.48251196359746	2.19582e-19	1.89467340957447e-18	Up	NA	NA	NA	K13493//cytokinin-N-glucosyltransferase [EC:2.4.1.-];K00699//glucuronosyltransferase [EC:2.4.1.17];K13030//cyanohydrin beta-glucosyltransferase [EC:2.4.1.85]	gi|700188495|gb|KGN43728.1|//hypothetical protein Csa_7G063920 [Cucumis sativus];gi|778724429|ref|XP_011658802.1|//PREDICTED: 7-deoxyloganetin glucosyltransferase-like [Cucumis sativus]
Csa4G009350	1296	62.78	175.27	1.48120214503633	4.9872e-126	2.79771859365994e-124	Up	NA	NA	NA	K08057//calreticulin	gi|449468886|ref|XP_004152152.1|//PREDICTED: calreticulin-3 [Cucumis sativus]
Csa3G730920	2004	10.18	28.38	1.47913702798486	1.850166e-33	2.59476450691643e-32	Up	NA	NA	NA	K04730//interleukin-1 receptor-associated kinase 1 [EC:2.7.11.1]	gi|449440251|ref|XP_004137898.1|//PREDICTED: probable L-type lectin-domain containing receptor kinase VI.1 [Cucumis sativus]
Csa7G060160	1291	9.30	25.80	1.47206844431522	1.121132e-14	7.73350655988661e-14	Up	GO:0016021//integral component of membrane	GO:0019199//transmembrane receptor protein kinase activity;GO:0004672//protein kinase activity	GO:0007165//signal transduction;GO:0006468//protein phosphorylation	K13416//brassinosteroid insensitive 1-associated receptor kinase 1 [EC:2.7.10.1 2.7.11.1]	gi|778724296|ref|XP_011658779.1|//PREDICTED: BRASSINOSTEROID INSENSITIVE 1-associated receptor kinase 1 isoform X1 [Cucumis sativus]
Csa6G525220	2178	117.42	325.60	1.47142253780565	0	0	Up	NA	NA	NA	K03021//DNA-directed RNA polymerase III subunit RPC2 [EC:2.7.7.6];K15601//lysine-specific demethylase 3 [EC:1.14.11.-]	gi|449433557|ref|XP_004134564.1|//PREDICTED: CSC1-like protein ERD4 [Cucumis sativus]
Csa6G406010	1968	7.57	20.99	1.47133696130642	1.382846e-31	1.83368393978202e-30	Up	NA	GO:0005524//ATP binding;GO:0032559//adenyl ribonucleotide binding;GO:0016301//kinase activity;GO:0004672//protein kinase activity	GO:0006464//cellular protein modification process;GO:0006468//protein phosphorylation	K04733//interleukin-1 receptor-associated kinase 4 [EC:2.7.11.1];K04730//interleukin-1 receptor-associated kinase 1 [EC:2.7.11.1]	gi|700192634|gb|KGN47838.1|//hypothetical protein Csa_6G406010 [Cucumis sativus]
Csa3G730960	3126	0.66	1.83	1.47130571892559	0.000171056	0.000501094973062453	Up	NA	NA	NA	K19613//leucine-rich repeat protein SHOC2;K10406//kinesin family member C2/C3;K13420//LRR receptor-like serine/threonine-protein kinase FLS2 [EC:2.7.11.1]	gi|778683155|ref|XP_011651852.1|//PREDICTED: receptor-like protein 12 [Cucumis sativus]
Csa7G433930	1413	3.85	10.67	1.47062982524216	1.026554e-09	5.17155801345756e-09	Up	NA	NA	GO:0006810//transport	NA	gi|449436100|ref|XP_004135832.1|//PREDICTED: molybdate transporter 2 [Cucumis sativus]
Csa5G097960	1164	2.36	6.54	1.47050377613624	1.703764e-05	5.6907120837337e-05	Up	NA	GO:0005525//GTP binding	NA	NA	gi|700194564|gb|KGN49741.1|//hypothetical protein Csa_5G097960 [Cucumis sativus];gi|778698401|ref|XP_011654528.1|//PREDICTED: protein AIG1-like [Cucumis sativus]
Csa5G551250	1955	9.41	26.07	1.47012395480702	9.04466e-32	1.21088962558459e-30	Up	NA	NA	NA	K07119//uncharacterized protein;K01183//chitinase [EC:3.2.1.14];K14638//solute carrier family 15 (peptide/histidine transporter), member 3/4	gi|449450151|ref|XP_004142827.1|//PREDICTED: MACPF domain-containing protein At1g14780 [Cucumis sativus]
Csa3G782680	924	21.10	58.29	1.46600540271195	4.87356e-30	6.20868579581152e-29	Up	GO:0044464//cell part	GO:0005515//protein binding	GO:0015031//protein transport	K08486//syntaxin 1B/2/3	gi|449437478|ref|XP_004136519.1|//PREDICTED: syntaxin-121 [Cucumis sativus]
Csa7G068600	1632	6.56	18.12	1.46581523542815	8.60924e-18	6.89093198355263e-17	Up	GO:0009536//plastid	GO:0016620//oxidoreductase activity, acting on the aldehyde or oxo group of donors, NAD or NADP as acceptor;GO:0016616//oxidoreductase activity, acting on the CH-OH group of donors, NAD or NADP as acceptor;GO:0000166//nucleotide binding	GO:0006779//porphyrin-containing compound biosynthetic process	K02492//glutamyl-tRNA reductase [EC:1.2.1.70]	gi|700188574|gb|KGN43807.1|//hypothetical protein Csa_7G068600 [Cucumis sativus]
Csa5G168740	3250	14.65	40.45	1.46523903800773	3.73798e-75	1.16050269027113e-73	Up	NA	NA	NA	K13466//EIX receptor 1/2;K03021//DNA-directed RNA polymerase III subunit RPC2 [EC:2.7.7.6];K10406//kinesin family member C2/C3	gi|700195158|gb|KGN50335.1|//hypothetical protein Csa_5G168740 [Cucumis sativus];gi|778700366|ref|XP_004143731.2|//PREDICTED: receptor-like protein 12 [Cucumis sativus]
Csa2G354780	804	26.25	72.37	1.46307434882901	7.63328e-32	1.02475467917241e-30	Up	NA	NA	NA	K05605//3-hydroxyisobutyryl-CoA hydrolase [EC:3.1.2.4]	gi|449450277|ref|XP_004142890.1|//PREDICTED: probable strigolactone esterase D14 homolog [Cucumis sativus]
Csa4G056830	2001	45.01	123.93	1.46120799619173	2.56158e-129	1.47090608495575e-127	Up	NA	GO:0016769//transferase activity, transferring nitrogenous groups;GO:0042802//identical protein binding;GO:0008483//transaminase activity;GO:0048037//cofactor binding;GO:0030170//pyridoxal phosphate binding	NA	K16871//4-aminobutyrate---pyruvate transaminase [EC:2.6.1.96]	gi|449460004|ref|XP_004147736.1|//PREDICTED: gamma aminobutyrate transaminase 1, mitochondrial-like [Cucumis sativus]
Csa4G269210	780	9.04	24.88	1.46059180771541	1.50426e-11	8.63264303066038e-11	Up	NA	NA	NA	NA	gi|449463889|ref|XP_004149663.1|//PREDICTED: protein YLS9-like [Cucumis sativus]
Csa3G686210	879	7.95	21.86	1.45926663550019	1.50426e-11	8.63009877984085e-11	Up	NA	NA	NA	NA	gi|700203434|gb|KGN58567.1|//hypothetical protein Csa_3G686210 [Cucumis sativus]
Csa6G446310	1389	2.23	6.13	1.45884336377048	7.47956e-06	2.60506557452138e-05	Up	NA	NA	NA	K14768//U3 small nucleolar RNA-associated protein 7	gi|449451215|ref|XP_004143357.1|//PREDICTED: uncharacterized protein LOC101222329 [Cucumis sativus]
Csa3G730930	1431	75.28	206.53	1.45601282574236	3.5357e-160	2.57775041947565e-158	Up	GO:0031224//intrinsic component of membrane	GO:0015101//organic cation transmembrane transporter activity	GO:0015696//ammonium transport	K03320//ammonium transporter, Amt family	gi|449439849|ref|XP_004137698.1|//PREDICTED: ammonium transporter 2 [Cucumis sativus]
Csa6G319770	2178	27.98	76.74	1.45558280243804	4.76342e-93	1.90009700245902e-91	Up	GO:0005777//peroxisome	GO:0016616//oxidoreductase activity, acting on the CH-OH group of donors, NAD or NADP as acceptor;GO:0016836//hydro-lyase activity;GO:0016856//racemase and epimerase activity, acting on hydroxy acids and derivatives;GO:0048037//cofactor binding;GO:0016863//intramolecular oxidoreductase activity, transposing C=C bonds	GO:0009062//fatty acid catabolic process	K10527//enoyl-CoA hydratase/3-hydroxyacyl-CoA dehydrogenase [EC:4.2.1.17 1.1.1.35 1.1.1.211]	gi|778714769|ref|XP_011657290.1|//PREDICTED: glyoxysomal fatty acid beta-oxidation multifunctional protein MFP-a [Cucumis sativus]
Csa5G136900	495	7.60	20.80	1.45251220469751	2.22754e-06	8.18600974891448e-06	Up	NA	NA	NA	NA	gi|700194629|gb|KGN49806.1|//hypothetical protein Csa_5G136900 [Cucumis sativus]
Csa4G007010	687	31.69	86.73	1.45250344981597	1.086374e-31	1.44944182892392e-30	Up	GO:0031224//intrinsic component of membrane;GO:0012505//endomembrane system;GO:0044431//Golgi apparatus part	NA	GO:0048193//Golgi vesicle transport	K08495//golgi SNAP receptor complex member 1	gi|778689689|ref|XP_011652999.1|//PREDICTED: Golgi SNAP receptor complex member 1-1 [Cucumis sativus]
Csa2G237140	888	8.58	23.48	1.45238285561051	2.37686e-12	1.43333199380421e-11	Up	NA	NA	NA	K08233//polyneuridine-aldehyde esterase [EC:3.1.1.78]	gi|449472695|ref|XP_004153671.1|//PREDICTED: salicylic acid-binding protein 2 [Cucumis sativus]
Csa3G183380	2112	3.81	10.42	1.45149237478519	1.523322e-13	9.90413695791583e-13	Up	NA	NA	NA	K13411;K13447//respiratory burst oxidase [EC:1.6.3.- 1.11.1.-]	gi|778679675|ref|XP_011651177.1|//PREDICTED: ferric reduction oxidase 4-like [Cucumis sativus]
Csa6G495020	702	16.58	45.30	1.45006704343785	1.228824e-17	9.7434981604888e-17	Up	NA	NA	NA	K01227//mannosyl-glycoprotein endo-beta-N-acetylglucosaminidase [EC:3.2.1.96]	gi|449448242|ref|XP_004141875.1|//PREDICTED: LOB domain-containing protein 37-like [Cucumis sativus]
Csa4G640970	1407	4.31	11.77	1.44935454594935	2.37094e-10	1.24636019551715e-09	Up	NA	NA	NA	K13065//shikimate O-hydroxycinnamoyltransferase [EC:2.3.1.133];K11714//rhamnogalacturonan II specific xylosyltransferase [EC:2.4.2.-]	gi|778696191|ref|XP_004141386.2|//PREDICTED: uncharacterized acetyltransferase At3g50280-like [Cucumis sativus]
Csa7G211090	903	9.69	26.43	1.44760785422649	6.85958e-14	4.52792757816209e-13	Up	NA	NA	NA	K13789//geranylgeranyl diphosphate synthase, type II [EC:2.5.1.1 2.5.1.10 2.5.1.29]	gi|449444204|ref|XP_004139865.1|//PREDICTED: heterodimeric geranylgeranyl pyrophosphate synthase small subunit, chloroplastic-like [Cucumis sativus]
Csa1G038320	849	16.50	44.93	1.44521303739026	3.7924e-21	3.56977071566731e-20	Up	NA	NA	NA	K03671//thioredoxin 1	gi|449439285|ref|XP_004137416.1|//PREDICTED: thioredoxin-like 1-2, chloroplastic [Cucumis sativus]
Csa5G601620	2052	1.07	2.91	1.44340835650714	0.000147694	0.000436931824316109	Up	GO:0043234//protein complex	GO:0019787//ubiquitin-like protein transferase activity	GO:0032446//protein modification by small protein conjugation	K08332//vacuolar protein 8	gi|449434911|ref|XP_004135239.1|//PREDICTED: U-box domain-containing protein 19-like [Cucumis sativus]
Csa3G842070	2203	9.02	24.52	1.4427596404354	1.8215e-30	2.34661277299801e-29	Up	NA	GO:0015926//glucosidase activity;GO:0004553//hydrolase activity, hydrolyzing O-glycosyl compounds	GO:0044238//primary metabolic process;GO:0005975//carbohydrate metabolic process	K05349//beta-glucosidase [EC:3.2.1.21]	gi|449446738|ref|XP_004141128.1|//PREDICTED: lysosomal beta glucosidase-like [Cucumis sativus]
Csa2G228380	450	8.77	23.84	1.44273548801743	1.926404e-06	7.13594296175071e-06	Up	NA	GO:0046872//metal ion binding;GO:0016628//oxidoreductase activity, acting on the CH-CH group of donors, NAD or NADP as acceptor	GO:0008152//metabolic process	K13448//calcium-binding protein CML;K02183//calmodulin	gi|449455254|ref|XP_004145368.1|//PREDICTED: calmodulin-like [Cucumis sativus]
Csa2G379300	1119	3.58	9.73	1.44248021751686	3.92278e-07	1.55552730657975e-06	Up	NA	NA	NA	K04124//gibberellin 3-beta-dioxygenase [EC:1.14.11.15]	gi|700207780|gb|KGN62899.1|//hypothetical protein Csa_2G379300 [Cucumis sativus]
Csa6G008710	2357	14.97	40.61	1.43976080586591	1.133592e-39	1.86530024277261e-38	Up	NA	NA	NA	K08176//MFS transporter, PHS family, inorganic phosphate transporter;K03509//DNA polymerase eta [EC:2.7.7.7]	gi|700190536|gb|KGN45740.1|//hypothetical protein Csa_6G008710 [Cucumis sativus];gi|778709356|ref|XP_011656391.1|//PREDICTED: uncharacterized protein LOC105435737 [Cucumis sativus]
Csa4G025140	1236	14.51	39.35	1.4393161163281	3.91386e-27	4.55665064354067e-26	Up	NA	GO:0016639//oxidoreductase activity, acting on the CH-NH2 group of donors, NAD or NADP as acceptor	GO:0019752//carboxylic acid metabolic process	K00261//glutamate dehydrogenase (NAD(P)+) [EC:1.4.1.3]	gi|449458315|ref|XP_004146893.1|//PREDICTED: glutamate dehydrogenase 2 [Cucumis sativus]
Csa5G149330	1998	107.77	292.03	1.43816095349751	0	0	Up	NA	GO:0032559//adenyl ribonucleotide binding;GO:0016628//oxidoreductase activity, acting on the CH-CH group of donors, NAD or NADP as acceptor	GO:0008152//metabolic process;GO:0050896//response to stimulus	K09490//heat shock 70kDa protein 5	gi|700194836|gb|KGN50013.1|//hypothetical protein Csa_5G149330 [Cucumis sativus]
Csa3G359120	5605	46.85	126.88	1.43734372315743	0	0	Up	GO:0031224//intrinsic component of membrane;GO:0016021//integral component of membrane	GO:0015405//P-P-bond-hydrolysis-driven transmembrane transporter activity;GO:0005524//ATP binding;GO:0032559//adenyl ribonucleotide binding;GO:0016628//oxidoreductase activity, acting on the CH-CH group of donors, NAD or NADP as acceptor;GO:0017111//nucleoside-triphosphatase activity;GO:0042626//ATPase activity, coupled to transmembrane movement of substances	GO:0006810//transport;GO:0055085//transmembrane transport;GO:0009207//purine ribonucleoside triphosphate catabolic process	K05666//ATP-binding cassette, subfamily C (CFTR/MRP), member 2	gi|778680929|ref|XP_004149463.2|//PREDICTED: ABC transporter C family member 10 [Cucumis sativus]
Csa2G368880	2454	70.62	191.10	1.43617905210522	1.712724e-253	2.16492762233766e-251	Up	NA	NA	NA	K09487//heat shock protein 90kDa beta	gi|449469875|ref|XP_004152644.1|//PREDICTED: endoplasmin homolog [Cucumis sativus]
Csa1G021900	2599	30.49	82.48	1.43570818235836	2.09348e-111	1.0239116e-109	Up	GO:0016021//integral component of membrane	GO:0046872//metal ion binding;GO:0008270//zinc ion binding	NA	K11498//centromeric protein E	gi|778656288|ref|XP_011648761.1|//PREDICTED: uncharacterized protein LOC101215825 [Cucumis sativus];gi|700208704|gb|KGN63800.1|//hypothetical protein Csa_1G021900 [Cucumis sativus]
Csa6G446370	1912	14.78	39.97	1.4352713032743	6.22642e-35	9.08571901949025e-34	Up	NA	GO:0005524//ATP binding;GO:0004672//protein kinase activity	GO:0006468//protein phosphorylation	K00924;K04733//interleukin-1 receptor-associated kinase 4 [EC:2.7.11.1];K04730//interleukin-1 receptor-associated kinase 1 [EC:2.7.11.1]	gi|700192972|gb|KGN48176.1|//hypothetical protein Csa_6G446370 [Cucumis sativus]
Csa5G174640	924	61.39	165.96	1.43475998736931	8.31252e-80	2.74256803932203e-78	Up	NA	NA	NA	K14563//rRNA 2'-O-methyltransferase fibrillarin [EC:2.1.1.-]	gi|778700668|ref|XP_004143621.2|//PREDICTED: probable mediator of RNA polymerase II transcription subunit 36b [Cucumis sativus]
Csa7G433330	4685	4.75	12.83	1.43352175187137	4.9584e-39	7.99008397350993e-38	Up	NA	NA	NA	K04733//interleukin-1 receptor-associated kinase 4 [EC:2.7.11.1];K03327//multidrug resistance protein, MATE family;K04382//serine/threonine-protein phosphatase 2A catalytic subunit [EC:3.1.3.16];K07573//exosome complex component CSL4;K01183//chitinase [EC:3.2.1.14]	gi|778729159|ref|XP_011659540.1|//PREDICTED: G-type lectin S-receptor-like serine/threonine-protein kinase CES101 isoform X1 [Cucumis sativus];gi|700190071|gb|KGN45304.1|//hypothetical protein Csa_7G433330 [Cucumis sativus]
Csa2G173050	552	24.98	67.45	1.43304496622767	1.79881e-19	1.55902205966162e-18	Up	GO:0031224//intrinsic component of membrane	NA	NA	K13347//peroxisomal membrane protein 2	gi|449458842|ref|XP_004147155.1|//PREDICTED: peroxisomal membrane protein PMP22 [Cucumis sativus]
Csa2G292840	1497	13.44	36.29	1.43303891870057	3.05012e-30	3.89846591726855e-29	Up	NA	NA	NA	K16815//calcium-independent phospholipase A2-gamma	gi|700206935|gb|KGN62054.1|//hypothetical protein Csa_2G292840 [Cucumis sativus];gi|449460680|ref|XP_004148073.1|//PREDICTED: patatin-like protein 2 [Cucumis sativus]
Csa7G432250	2413	98.15	264.93	1.43255104727426	2.73164e-297	4.35853313442623e-295	Up	NA	NA	NA	K10280//F-box and leucine-rich repeat protein 14	gi|449436168|ref|XP_004135866.1|//PREDICTED: F-box/LRR-repeat protein 20 [Cucumis sativus]
Csa5G167050	3285	6.34	17.10	1.43144157963385	2.24448e-27	2.64313658076225e-26	Up	NA	NA	NA	K17609//nucleoredoxin [EC:1.8.1.8];K04730//interleukin-1 receptor-associated kinase 1 [EC:2.7.11.1]	gi|778700267|ref|XP_011654846.1|//PREDICTED: U-box domain-containing protein 35-like isoform X1 [Cucumis sativus];gi|700195136|gb|KGN50313.1|//hypothetical protein Csa_5G167050 [Cucumis sativus]
Csa3G728010	2929	19.58	52.67	1.42760069455026	5.87388e-71	1.7377043781155e-69	Up	GO:0016021//integral component of membrane	GO:0046872//metal ion binding;GO:0005509//calcium ion binding;GO:0004871//signal transducer activity	NA	K09597//signal peptide peptidase-like 2B [EC:3.4.23.-];K04730//interleukin-1 receptor-associated kinase 1 [EC:2.7.11.1];K03935//NADH dehydrogenase (ubiquinone) Fe-S protein 2 [EC:1.6.5.3 1.6.99.3]	gi|449439799|ref|XP_004137673.1|//PREDICTED: vacuolar-sorting receptor 1 [Cucumis sativus];gi|700203550|gb|KGN58683.1|//hypothetical protein Csa_3G728010 [Cucumis sativus]
Csa1G250150	2706	22.93	61.65	1.42686453970941	2.09852e-86	7.62122953731343e-85	Up	GO:0016021//integral component of membrane	GO:0004674//protein serine/threonine kinase activity;GO:0005524//ATP binding	GO:0006468//protein phosphorylation	K04733//interleukin-1 receptor-associated kinase 4 [EC:2.7.11.1];K04730//interleukin-1 receptor-associated kinase 1 [EC:2.7.11.1]	gi|449464670|ref|XP_004150052.1|//PREDICTED: proline-rich receptor-like protein kinase PERK1 [Cucumis sativus];gi|700210056|gb|KGN65152.1|//hypothetical protein Csa_1G250150 [Cucumis sativus]
Csa2G237150	630	24.89	66.91	1.42665561391504	4.415e-22	4.33177368951613e-21	Up	NA	NA	NA	NA	gi|449471271|ref|XP_004153261.1|//PREDICTED: uncharacterized protein LOC101222441 [Cucumis sativus]
Csa3G135120	687	12.83	34.47	1.42582012827759	3.60484e-13	2.29394623864008e-12	Up	NA	NA	GO:0006351//transcription, DNA-templated	K14516//ethylene-responsive transcription factor 1	gi|449432562|ref|XP_004134068.1|//PREDICTED: ethylene-responsive transcription factor 1B [Cucumis sativus]
Csa3G123720	1191	30.48	81.84	1.42494324225201	8.12758e-52	1.72908712874317e-50	Up	NA	GO:0016741//transferase activity, transferring one-carbon groups	GO:0006730//one-carbon metabolic process	K16302//metal transporter CNNM	gi|778677304|ref|XP_011650766.1|//PREDICTED: probable methyltransferase PMT16 [Cucumis sativus]
Csa2G000350	2184	13.39	35.93	1.42403297467785	3.3128e-43	5.92711073529412e-42	Up	NA	GO:0003824//catalytic activity	NA	K04733//interleukin-1 receptor-associated kinase 4 [EC:2.7.11.1];K17609//nucleoredoxin [EC:1.8.1.8]	gi|778665605|ref|XP_004141173.2|//PREDICTED: U-box domain-containing protein 34 isoform X1 [Cucumis sativus]
Csa3G200710	1434	8.28	22.21	1.42350672004766	3.64344e-18	2.96874018585182e-17	Up	NA	GO:0016758//transferase activity, transferring hexosyl groups	NA	K13496//UDP-glucosyl transferase 73C [EC:2.4.1.-];K14595//abscisate beta-glucosyltransferase [EC:2.4.1.263]	gi|449445896|ref|XP_004140708.1|//PREDICTED: UDP-glucose flavonoid 3-O-glucosyltransferase 7-like [Cucumis sativus]
BGI_novel_G000397	1770	1.75	4.69	1.42223300068305	1.10223e-05	3.77016502899315e-05	Up	GO:0043234//protein complex;GO:0016021//integral component of membrane;GO:0005741//mitochondrial outer membrane	NA	GO:0019375//galactolipid biosynthetic process;GO:0050665//hydrogen peroxide biosynthetic process	K18158//nuclear control of ATPase protein 2	gi|778716798|ref|XP_011657598.1|//PREDICTED: uncharacterized protein LOC101204845 [Cucumis sativus]
Csa5G607970	441	6.19	16.58	1.42143269228149	0.0001093328	0.000329555943759678	Up	NA	NA	NA	NA	gi|700196832|gb|KGN52009.1|//hypothetical protein Csa_5G607970 [Cucumis sativus]
Csa1G042370	1838	1.73	4.63	1.42024015562351	3.27724e-06	1.18445513999257e-05	Up	GO:0009506//plasmodesma;GO:0005622//intracellular;GO:0005886//plasma membrane	GO:0004709//MAP kinase kinase kinase activity;GO:0005524//ATP binding;GO:0004672//protein kinase activity	GO:0006952//defense response;GO:0000186//activation of MAPKK activity	K04733//interleukin-1 receptor-associated kinase 4 [EC:2.7.11.1]	gi|700209029|gb|KGN64125.1|//hypothetical protein Csa_1G042370 [Cucumis sativus];gi|449439411|ref|XP_004137479.1|//PREDICTED: cysteine-rich receptor-like protein kinase 10 isoform X1 [Cucumis sativus]
Csa4G099750	1455	32.19	86.14	1.42007074676418	1.496352e-66	4.06248089707113e-65	Up	GO:0044464//cell part	GO:0015291//secondary active transmembrane transporter activity	GO:0015893//drug transport	K03327//multidrug resistance protein, MATE family	gi|449438809|ref|XP_004137180.1|//PREDICTED: protein TRANSPARENT TESTA 12-like [Cucumis sativus]
Csa3G123730	735	14.72	39.38	1.41968543984454	8.566e-16	6.27571531802785e-15	Up	NA	NA	NA	K16302//metal transporter CNNM;K15449//tRNA wybutosine-synthesizing protein 1 [EC:4.1.3.44]	gi|700201418|gb|KGN56551.1|//ATP binding protein [Cucumis sativus]
Csa2G009450	3315	5.83	15.59	1.41905313949729	2.42664e-13	1.56052111793855e-12	Up	NA	GO:0005509//calcium ion binding	NA	NA	gi|449443259|ref|XP_004139397.1|//PREDICTED: calcium uptake protein 1, mitochondrial-like isoform X1 [Cucumis sativus];gi|659070767|ref|XP_008456564.1|//PREDICTED: calcium uptake protein 1, mitochondrial-like isoform X1 [Cucumis melo]
Csa6G148170	762	5.06	13.52	1.41788586158787	1.663492e-06	6.20811642484663e-06	Up	NA	NA	NA	NA	gi|778713318|ref|XP_011657021.1|//PREDICTED: uncharacterized protein LOC101221076 [Cucumis sativus]
Csa2G058660	748	37.42	99.80	1.41523025698384	9.91824e-43	1.75516781672727e-41	Up	GO:0016021//integral component of membrane;GO:0009534//chloroplast thylakoid	NA	NA	NA	gi|778667440|ref|XP_011648927.1|//PREDICTED: uncharacterized protein LOC101212671 [Cucumis sativus]
Csa4G289650	2136	1.32	3.52	1.41503749927884	3.21062e-05	0.000104093818987342	Up	NA	NA	NA	K04733//interleukin-1 receptor-associated kinase 4 [EC:2.7.11.1];K00276//primary-amine oxidase [EC:1.4.3.21]	gi|700198989|gb|KGN54147.1|//hypothetical protein Csa_4G289650 [Cucumis sativus]
Csa3G094510	1554	6.50	17.33	1.41476003124435	1.657932e-15	1.19752520638219e-14	Up	GO:0031224//intrinsic component of membrane	NA	GO:0006810//transport	K08202//MFS transporter, OCT family, solute carrier family 22 (organic cation transporter), member 4/5	gi|449464442|ref|XP_004149938.1|//PREDICTED: organic cation/carnitine transporter 4-like [Cucumis sativus]
Csa4G165850	741	3.47	9.24	1.4129571888378	0.0001093328	0.000329606982313768	Up	NA	NA	NA	K09955//uncharacterized protein	gi|449463356|ref|XP_004149400.1|//PREDICTED: DTW domain-containing protein 2 [Cucumis sativus]
Csa2G047780	315	8.29	22.06	1.41198878409563	0.000321794	0.000903511034761286	Up	NA	NA	NA	NA	gi|700205965|gb|KGN61084.1|//hypothetical protein Csa_2G047780 [Cucumis sativus]
Csa6G128660	951	5.45	14.50	1.41172476523801	2.30938e-08	1.03940788624277e-07	Up	NA	NA	NA	K18643//katanin p80 WD40 repeat-containing subunit B1	gi|449444342|ref|XP_004139934.1|//PREDICTED: uncharacterized protein LOC101222318 [Cucumis sativus]
Csa4G050830	1488	12.12	32.13	1.40653128199846	4.09952e-26	4.6396079255814e-25	Up	NA	GO:0016616//oxidoreductase activity, acting on the CH-OH group of donors, NAD or NADP as acceptor;GO:0000166//nucleotide binding;GO:0048037//cofactor binding	GO:0006007//glucose catabolic process	K00033//6-phosphogluconate dehydrogenase [EC:1.1.1.44 1.1.1.343]	gi|778690984|ref|XP_011653205.1|//PREDICTED: 6-phosphogluconate dehydrogenase, decarboxylating 2, chloroplastic [Cucumis sativus]
Csa6G085110	1425	10.50	27.81	1.4052144167932	8.0919e-22	7.82109857994042e-21	Up	NA	NA	NA	NA	gi|778711472|ref|XP_004140598.2|//PREDICTED: uncharacterized protein LOC101212067 [Cucumis sativus]
Csa6G501970	2600	12.30	32.57	1.4048854041693	6.68708e-46	1.26012293591481e-44	Up	NA	GO:0010181//FMN binding;GO:0016491//oxidoreductase activity	GO:0045892//negative regulation of transcription, DNA-templated;GO:0055114//oxidation-reduction process	K03809//NAD(P)H dehydrogenase (quinone) [EC:1.6.5.2]	gi|700193604|gb|KGN48808.1|//hypothetical protein Csa_6G501970 [Cucumis sativus];gi|449451499|ref|XP_004143499.1|//PREDICTED: probable NAD(P)H dehydrogenase (quinone) FQR1-like 2 [Cucumis sativus]
Csa5G638310	447	8.03	21.23	1.40263247838806	1.390738e-05	4.69268606482926e-05	Up	NA	NA	NA	K09549//prefoldin subunit 2	gi|449447400|ref|XP_004141456.1|//PREDICTED: probable prefoldin subunit 2 [Cucumis sativus]
Csa7G308910	2161	43.29	114.32	1.40097211588346	2.17406e-115	1.08792421491003e-113	Up	NA	GO:0033926//glycopeptide alpha-N-acetylgalactosaminidase activity	NA	K02986//small subunit ribosomal protein S4;K11593//eukaryotic translation initiation factor 2C	gi|778726568|ref|XP_011659122.1|//PREDICTED: probable alkaline/neutral invertase D [Cucumis sativus]
BGI_novel_G000424	1282	43.72	115.42	1.40052792999932	4.15844e-76	1.30772525105008e-74	Up	GO:0005576//extracellular region	NA	NA	K13449//pathogenesis-related protein 1	gi|778724780|ref|XP_011658860.1|//PREDICTED: pathogenesis-related protein 1-like [Cucumis sativus]
Csa3G710230	1551	24.88	65.66	1.40002826444238	1.757046e-53	3.86034508306998e-52	Up	NA	NA	NA	NA	gi|449439751|ref|XP_004137649.1|//PREDICTED: uncharacterized protein LOC101216149 [Cucumis sativus]
Csa1G002670	804	10.78	28.42	1.39854937649027	9.60986e-15	6.6524016628734e-14	Up	GO:0016021//integral component of membrane;GO:0005743//mitochondrial inner membrane	NA	GO:0006850//mitochondrial pyruvate transport	NA	gi|449440578|ref|XP_004138061.1|//PREDICTED: mitochondrial pyruvate carrier 1-like [Cucumis sativus]
Csa2G247040	795	406.83	1072.47	1.39843931822959	0	0	Up	NA	GO:1901363//heterocyclic compound binding;GO:0097159//organic cyclic compound binding	NA	K13195//cold-inducible RNA-binding protein;K13098//RNA-binding protein FUS;K12885//heterogeneous nuclear ribonucleoprotein G	gi|700206673|gb|KGN61792.1|//hypothetical protein Csa_2G247040 [Cucumis sativus];gi|778669320|ref|XP_004148845.2|//PREDICTED: LOW QUALITY PROTEIN: glycine-rich RNA-binding, abscisic acid-inducible protein-like [Cucumis sativus]
Csa1G071870	1557	40.06	105.60	1.39837550843311	4.16364e-85	1.48442154285714e-83	Up	GO:0031224//intrinsic component of membrane	GO:0015291//secondary active transmembrane transporter activity;GO:0016628//oxidoreductase activity, acting on the CH-CH group of donors, NAD or NADP as acceptor	GO:0071702//organic substance transport;GO:0008152//metabolic process	K08150//MFS transporter, SP family, solute carrier family 2 (myo-inositol transporter), member 13	gi|449457688|ref|XP_004146580.1|//PREDICTED: sugar carrier protein C [Cucumis sativus]
BGI_novel_G000024	1675	4.02	10.58	1.3960722209351	1.16647e-10	6.27424841668969e-10	Up	NA	NA	NA	K00512//steroid 17alpha-monooxygenase / 17alpha-hydroxyprogesterone aldolase [EC:1.14.14.19 4.1.2.30]	gi|778657940|ref|XP_011651837.1|//PREDICTED: cytochrome P450 71A1-like [Cucumis sativus]
Csa7G024130	1894	15.32	40.27	1.3942891750208	1.346834e-40	2.26598709109767e-39	Up	NA	GO:0004713//protein tyrosine kinase activity;GO:0004674//protein serine/threonine kinase activity;GO:0005524//ATP binding;GO:0032559//adenyl ribonucleotide binding	GO:0006464//cellular protein modification process;GO:0006468//protein phosphorylation	K00924;K04733//interleukin-1 receptor-associated kinase 4 [EC:2.7.11.1];K04730//interleukin-1 receptor-associated kinase 1 [EC:2.7.11.1]	gi|700188106|gb|KGN43339.1|//hypothetical protein Csa_7G024130 [Cucumis sativus]
Csa5G106010	1539	2.12	5.57	1.39361306277683	9.49874e-06	3.27203101822686e-05	Up	NA	GO:0016831//carboxy-lyase activity;GO:0048037//cofactor binding	GO:0009064//glutamine family amino acid metabolic process	K01580//glutamate decarboxylase [EC:4.1.1.15]	gi|778698422|ref|XP_004151335.2|//PREDICTED: glutamate decarboxylase 4-like [Cucumis sativus]
Csa2G416240	1893	4.91	12.90	1.39357613599592	8.22316e-14	5.41149535361731e-13	Up	NA	GO:0016740//transferase activity	NA	K10999//cellulose synthase A [EC:2.4.1.12]	gi|778673446|ref|XP_011649993.1|//PREDICTED: cellulose synthase-like protein H1 isoform X2 [Cucumis sativus];gi|449468376|ref|XP_004151897.1|//PREDICTED: cellulose synthase-like protein H1 isoform X1 [Cucumis sativus]
Csa1G046210	3338	6.65	17.45	1.39180079070846	3.66268e-28	4.42568149472377e-27	Up	GO:0016021//integral component of membrane	GO:0003824//catalytic activity	NA	K13420//LRR receptor-like serine/threonine-protein kinase FLS2 [EC:2.7.11.1]	gi|449469707|ref|XP_004152560.1|//PREDICTED: LRR receptor-like serine/threonine-protein kinase GSO1 [Cucumis sativus]
Csa4G013040	615	13.63	35.76	1.39156117437811	8.83606e-12	5.1374774181601e-11	Up	NA	GO:0004601//peroxidase activity	GO:0008152//metabolic process;GO:0006950//response to stress	K00432//glutathione peroxidase [EC:1.11.1.9]	gi|449468796|ref|XP_004152107.1|//PREDICTED: probable phospholipid hydroperoxide glutathione peroxidase [Cucumis sativus]
Csa2G296130	1478	21.00	55.04	1.39009114214861	2.87396e-33	4.01611668054558e-32	Up	NA	GO:0032559//adenyl ribonucleotide binding;GO:0016301//kinase activity	GO:0016310//phosphorylation;GO:0006796//phosphate-containing compound metabolic process	K00891//shikimate kinase [EC:2.7.1.71]	gi|778670141|ref|XP_011649381.1|//PREDICTED: shikimate kinase, chloroplastic [Cucumis sativus]
Csa4G664530	1056	28.78	75.41	1.38968925759344	9.51664e-41	1.60808085277778e-39	Up	NA	NA	NA	NA	gi|778697290|ref|XP_011654291.1|//PREDICTED: bZIP transcription factor 60 [Cucumis sativus]
Csa6G113500	2884	51.65	135.27	1.38900166160626	2.89342e-177	2.35662400502092e-175	Up	GO:0016021//integral component of membrane	NA	NA	K08869//aarF domain-containing kinase;K13457//disease resistance protein RPM1	gi|778712394|ref|XP_011656889.1|//PREDICTED: uncharacterized aarF domain-containing protein kinase At1g79600, chloroplastic [Cucumis sativus]
Csa6G403600	1452	45.88	120.14	1.38877927251064	6.60988e-89	2.50326700544747e-87	Up	NA	NA	NA	K03094//S-phase kinase-associated protein 1	gi|700192590|gb|KGN47794.1|//hypothetical protein Csa_6G403600 [Cucumis sativus]
Csa3G902190	945	85.35	223.33	1.3877140035611	5.54816e-104	2.50581166032483e-102	Up	NA	NA	NA	NA	gi|700205243|gb|KGN60376.1|//hypothetical protein Csa_3G902190 [Cucumis sativus]
Csa6G488880	2902	27.04	70.75	1.38763499632442	7.33022e-99	3.14295291894273e-97	Up	NA	NA	NA	K04733//interleukin-1 receptor-associated kinase 4 [EC:2.7.11.1];K04730//interleukin-1 receptor-associated kinase 1 [EC:2.7.11.1]	gi|778718165|ref|XP_004142024.2|//PREDICTED: wall-associated receptor kinase-like 14 isoform X2 [Cucumis sativus];gi|700193265|gb|KGN48469.1|//hypothetical protein Csa_6G488880 [Cucumis sativus]
Csa2G163170	1503	137.71	360.09	1.38672420868803	1.245686e-271	1.75713939681159e-269	Up	GO:0016020//membrane	NA	GO:0006810//transport	K03320//ammonium transporter, Amt family	gi|449458888|ref|XP_004147178.1|//PREDICTED: ammonium transporter 1 member 1 [Cucumis sativus]
Csa7G433940	3219	7.06	18.46	1.38666246437459	2.9276e-32	3.97687799023029e-31	Up	NA	NA	NA	K10581//ubiquitin-conjugating enzyme E2 O [EC:2.3.2.24]	gi|449436589|ref|XP_004136075.1|//PREDICTED: uncharacterized protein LOC101220341 [Cucumis sativus]
Csa7G449460	2205	44.93	117.41	1.38580432338205	5.20512e-133	3.10806337177914e-131	Up	NA	NA	NA	NA	gi|778729686|ref|XP_004141703.2|//PREDICTED: probable GTP diphosphokinase RSH2, chloroplastic [Cucumis sativus]
Csa3G229410	1227	2.33	6.08	1.38374136878931	4.70642e-05	0.000149040461558484	Up	NA	NA	NA	NA	gi|449457085|ref|XP_004146279.1|//PREDICTED: uncharacterized protein LOC101210037 [Cucumis sativus]
Csa1G042460	1762	37.97	99.03	1.3830056403246	4.7454e-90	1.8328165952381e-88	Up	NA	NA	NA	NA	gi|700209038|gb|KGN64134.1|//hypothetical protein Csa_1G042460 [Cucumis sativus];gi|449439417|ref|XP_004137482.1|//PREDICTED: uncharacterized protein LOC101215184 [Cucumis sativus]
Csa4G361780	1443	112.75	294.01	1.38273779200635	5.39408e-212	5.2239383721393e-210	Up	GO:0031224//intrinsic component of membrane	NA	GO:0006865//amino acid transport	K14209//solute carrier family 36 (proton-coupled amino acid transporter)	gi|778694297|ref|XP_011653779.1|//PREDICTED: amino acid permease 3-like [Cucumis sativus]
BGI_novel_G000196	3656	17.40	45.36	1.38233333420614	6.9372e-87	2.54311742372881e-85	Up	NA	NA	NA	K01408//insulysin [EC:3.4.24.56]	gi|778684988|ref|XP_011652139.1|//PREDICTED: zinc-metallopeptidase, peroxisomal-like isoform X2 [Cucumis sativus]
Csa4G648530	789	11.69	30.43	1.38021940398294	6.17986e-13	3.87305713972956e-12	Up	NA	NA	NA	NA	gi|449447177|ref|XP_004141345.1|//PREDICTED: vitellogenin-2-like [Cucumis sativus]
Csa1G597690	696	19.16	49.84	1.37920650728782	8.54212e-18	6.84002089345948e-17	Up	NA	NA	NA	K13464//jasmonate ZIM domain-containing protein	gi|449452598|ref|XP_004144046.1|//PREDICTED: protein TIFY 10A [Cucumis sativus]
BGI_novel_G000342	2321	1.73	4.50	1.37915296358031	1.06285e-06	4.04881371819961e-06	Up	GO:0016021//integral component of membrane	NA	GO:0071705//nitrogen compound transport	NA	gi|449434726|ref|XP_004135147.1|//PREDICTED: ureide permease 1-like [Cucumis sativus]
Csa4G642320	1920	24.60	63.97	1.37873716769895	2.73738e-63	7.09531811984021e-62	Up	NA	GO:0008233//peptidase activity	NA	K00924;K01381//saccharopepsin [EC:3.4.23.25]	gi|778696352|ref|XP_011654143.1|//PREDICTED: aspartic proteinase-like protein 2 [Cucumis sativus]
Csa3G149320	2088	30.28	78.64	1.37689811635485	4.26186e-84	1.49211091294964e-82	Up	NA	GO:0015645//fatty acid ligase activity	NA	K01897//long-chain acyl-CoA synthetase [EC:6.2.1.3]	gi|449432710|ref|XP_004134142.1|//PREDICTED: long chain acyl-CoA synthetase 6, peroxisomal-like [Cucumis sativus]
Csa4G637750	1270	12.47	32.35	1.3753042470502	3.09034e-19	2.65240557495591e-18	Up	GO:0016021//integral component of membrane	GO:0008270//zinc ion binding	NA	K10666//E3 ubiquitin-protein ligase RNF5 [EC:2.3.2.27]	gi|449446936|ref|XP_004141226.1|//PREDICTED: E3 ubiquitin-protein ligase RMA3 [Cucumis sativus]
Csa3G837040	807	14.58	37.79	1.37401379893302	5.6338e-16	4.15879980280622e-15	Up	NA	NA	NA	NA	gi|778685819|ref|XP_011652280.1|//PREDICTED: uncharacterized protein LOC105435007 [Cucumis sativus]
Csa7G343870	1728	1.42	3.68	1.37381483655233	0.000160514	0.000472131387730432	Up	NA	NA	NA	K01051//pectinesterase [EC:3.1.1.11]	gi|778727001|ref|XP_004139620.2|//PREDICTED: pectinesterase-like [Cucumis sativus]
Csa1G033190	1125	34.59	89.60	1.37314371857204	1.73998e-50	3.59177631813362e-49	Up	NA	NA	NA	NA	gi|449439268|ref|XP_004137408.1|//PREDICTED: uncharacterized protein LOC101217261 [Cucumis sativus]
Csa6G502690	855	10.42	26.99	1.37306969918834	1.737008e-12	1.05565400337184e-11	Up	NA	GO:0016798//hydrolase activity, acting on glycosyl bonds	GO:0006281//DNA repair	K01247//DNA-3-methyladenine glycosylase II [EC:3.2.2.21]	gi|449451521|ref|XP_004143510.1|//PREDICTED: DNA-3-methyladenine glycosylase 1 [Cucumis sativus]
Csa5G647530	5705	28.28	73.14	1.37087850653197	2.33232e-223	2.3895232168421e-221	Up	NA	NA	NA	K19613//leucine-rich repeat protein SHOC2	gi|659119228|ref|XP_008459543.1|//PREDICTED: TMV resistance protein N-like [Cucumis melo];gi|700197454|gb|KGN52631.1|//hypothetical protein Csa_5G647530 [Cucumis sativus]
Csa6G498960	729	15.92	41.16	1.37040264635032	1.576282e-15	1.14024174700855e-14	Up	NA	NA	NA	NA	gi|449451387|ref|XP_004143443.1|//PREDICTED: nicotinamidase 1 [Cucumis sativus]
Csa6G446400	678	4.98	12.87	1.36979440615262	2.0288e-05	6.72329261150834e-05	Up	NA	NA	NA	K13035//beta-cyano-L-alanine hydratase/nitrilase [EC:3.5.5.4 4.2.1.65];K16221//transcription factor TCP21 (protein CCA1 HIKING EXPEDITION)	gi|700192975|gb|KGN48179.1|//hypothetical protein Csa_6G446400 [Cucumis sativus]
Csa5G616390	2352	71.33	184.01	1.36720329281694	4.79178e-217	4.73486241015228e-215	Up	NA	NA	NA	K02367//glucuronyl/N-acetylglucosaminyl transferase EXT2 [EC:2.4.1.224 2.4.1.225]	gi|449449393|ref|XP_004142449.1|//PREDICTED: glycosyltransferase family protein 64 protein C5 [Cucumis sativus]
Csa1G532300	1179	9.21	23.69	1.3630051371489	5.11542e-15	3.59872662522588e-14	Up	NA	GO:0016787//hydrolase activity	NA	K17506//protein phosphatase 1L [EC:3.1.3.16]	gi|778661742|ref|XP_004145250.2|//PREDICTED: probable protein phosphatase 2C 25 [Cucumis sativus]
Csa4G310720	2538	28.08	72.20	1.36245590146997	1.04397e-92	4.15581186503068e-91	Up	GO:0005634//nucleus;GO:0005829//cytosol;GO:0031307//integral component of mitochondrial outer membrane	GO:0003876//AMP deaminase activity;GO:0043424//protein histidine kinase binding	GO:0032264//IMP salvage;GO:0009737//response to abscisic acid;GO:0009793//embryo development ending in seed dormancy	K01490//AMP deaminase [EC:3.5.4.6]	gi|449461767|ref|XP_004148613.1|//PREDICTED: AMP deaminase [Cucumis sativus]
Csa6G013350	423	60.10	154.44	1.36160956334331	3.2105e-29	3.99588190537084e-28	Up	NA	NA	NA	NA	gi|700190608|gb|KGN45812.1|//Poly(A)-binding protein C-terminal interacting protein 6 [Cucumis sativus]
Csa3G166330	549	4.83	12.41	1.36140802129458	0.000234558	0.0006731396178682	Up	NA	NA	NA	K01870//isoleucyl-tRNA synthetase [EC:6.1.1.5];K19027//zinc finger FYVE domain-containing protein 26	gi|449432918|ref|XP_004134245.1|//PREDICTED: dirigent protein 11-like [Cucumis sativus]
Csa6G022370	2405	16.34	41.96	1.36060669443158	1.41821e-42	2.4961008915009e-41	Up	GO:0016021//integral component of membrane	NA	NA	K07119//uncharacterized protein;K01183//chitinase [EC:3.2.1.14];K14638//solute carrier family 15 (peptide/histidine transporter), member 3/4	gi|778709990|ref|XP_004138354.2|//PREDICTED: MACPF domain-containing protein At4g24290-like [Cucumis sativus]
Csa6G092010	774	66.13	169.81	1.36054461407433	2.24632e-62	5.76871571503958e-61	Up	NA	GO:0003676//nucleic acid binding	NA	K13126//polyadenylate-binding protein;K00162//pyruvate dehydrogenase E1 component beta subunit [EC:1.2.4.1];K05941//glutathione gamma-glutamylcysteinyltransferase [EC:2.3.2.15]	gi|449445576|ref|XP_004140548.1|//PREDICTED: NAC domain-containing protein 18 [Cucumis sativus]
Csa2G377970	699	53.87	138.23	1.3595167869291	9.50082e-46	1.78688852289855e-44	Up	NA	NA	NA	NA	gi|778672187|ref|XP_011649757.1|//PREDICTED: serine/threonine-protein kinase STE20 [Cucumis sativus]
Csa1G008530	2269	14.56	37.35	1.3590978874779	2.79306e-45	5.19786863862333e-44	Up	GO:0044464//cell part	NA	GO:0015833//peptide transport	K14638//solute carrier family 15 (peptide/histidine transporter), member 3/4	gi|449440752|ref|XP_004138148.1|//PREDICTED: protein NRT1/ PTR FAMILY 2.11-like [Cucumis sativus];gi|700208551|gb|KGN63647.1|//hypothetical protein Csa_1G008530 [Cucumis sativus]
Csa1G023030	444	28.57	73.27	1.35872157940307	2.08388e-15	1.49630424492807e-14	Up	NA	NA	NA	NA	gi|700208719|gb|KGN63815.1|//hypothetical protein Csa_1G023030 [Cucumis sativus]
Csa6G448740	1848	7.89	20.22	1.35768579188956	6.23822e-20	5.55504073741995e-19	Up	NA	NA	NA	K01754//threonine dehydratase [EC:4.3.1.19]	gi|449451080|ref|XP_004143290.1|//PREDICTED: threonine dehydratase biosynthetic, chloroplastic-like [Cucumis sativus]
Csa4G000870	1428	33.87	86.72	1.35635676985971	2.15082e-61	5.38839924324324e-60	Up	NA	GO:0016769//transferase activity, transferring nitrogenous groups;GO:0016846//carbon-sulfur lyase activity;GO:0048037//cofactor binding	GO:0008652//cellular amino acid biosynthetic process	K15849//bifunctional aspartate aminotransferase and glutamate/aspartate-prephenate aminotransferase [EC:2.6.1.1 2.6.1.78 2.6.1.79]	gi|449469136|ref|XP_004152277.1|//PREDICTED: bifunctional aspartate aminotransferase and glutamate/aspartate-prephenate aminotransferase [Cucumis sativus]
Csa3G816090	5299	1.00	2.56	1.35614381022528	1.093246e-07	4.61930250401563e-07	Up	NA	GO:0005488//binding	NA	K10406//kinesin family member C2/C3	gi|700204263|gb|KGN59396.1|//hypothetical protein Csa_3G816090 [Cucumis sativus];gi|778685071|ref|XP_011652155.1|//PREDICTED: kinesin-4-like [Cucumis sativus]
Csa6G486860	1659	19.68	50.37	1.35583451031895	1.702784e-32	2.32933192860155e-31	Up	GO:0031224//intrinsic component of membrane;GO:0016021//integral component of membrane	GO:0005338//nucleotide-sugar transmembrane transporter activity	GO:0015780//nucleotide-sugar transport;GO:1901679//nucleotide transmembrane transport	K15285//solute carrier family 35, member E3	gi|449448436|ref|XP_004141972.1|//PREDICTED: UDP-galactose transporter 2 [Cucumis sativus]
Csa3G316280	498	49.61	126.95	1.35555753264219	5.34058e-29	6.60481132655654e-28	Up	NA	NA	NA	K12486//stromal membrane-associated protein;K01537//Ca2+-transporting ATPase [EC:3.6.3.8]	gi|449456194|ref|XP_004145835.1|//PREDICTED: probable ADP-ribosylation factor GTPase-activating protein AGD11 [Cucumis sativus]
Csa3G859650	2490	2.24	5.73	1.3550364066993	1.592974e-08	7.26202151850117e-08	Up	NA	NA	NA	K04730//interleukin-1 receptor-associated kinase 1 [EC:2.7.11.1];K16219//protein N-terminal methyltransferase [EC:2.1.1.244];K13457//disease resistance protein RPM1	gi|449460289|ref|XP_004147878.1|//PREDICTED: uncharacterized protein LOC101206314 [Cucumis sativus]
Csa4G658570	3145	109.49	279.45	1.35179106416251	0	0	Up	NA	NA	GO:0009987//cellular process	K10523//speckle-type POZ protein;K20285//Rab9 effector protein with kelch motifs	gi|449455597|ref|XP_004145539.1|//PREDICTED: BTB/POZ domain-containing protein At2g30600 [Cucumis sativus]
Csa4G540120	969	4.56	11.60	1.34701907585019	6.27606e-07	2.44633127673208e-06	Up	NA	NA	NA	K03593//ATP-binding protein involved in chromosome partitioning	gi|700199689|gb|KGN54847.1|//hypothetical protein Csa_4G540120 [Cucumis sativus]
Csa4G303160	675	25.58	65.07	1.34697628951179	2.61106e-21	2.48057071547096e-20	Up	NA	NA	NA	K00799//glutathione S-transferase [EC:2.5.1.18]	gi|778693596|ref|XP_011653661.1|//PREDICTED: glutathione S-transferase U8 [Cucumis sativus]
Csa4G629470	1239	32.45	82.50	1.34617564113404	1.585234e-49	3.21439219208333e-48	Up	NA	GO:0016846//carbon-sulfur lyase activity;GO:0048037//cofactor binding;GO:0070547//L-tyrosine aminotransferase activity	GO:0008652//cellular amino acid biosynthetic process	K00815//tyrosine aminotransferase [EC:2.6.1.5]	gi|449456617|ref|XP_004146045.1|//PREDICTED: probable aminotransferase TAT2 [Cucumis sativus]
Csa3G122470	246	13.18	33.50	1.34581072522445	0.000289686	0.000818317758815847	Up	NA	NA	NA	NA	NA
Csa4G653450	1653	36.23	92.02	1.34476265064996	1.407678e-74	4.30846854528302e-73	Up	NA	NA	NA	K10526//OPC-8:0 CoA ligase 1 [EC:6.2.1.-]	gi|449455583|ref|XP_004145532.1|//PREDICTED: 4-coumarate--CoA ligase-like 5 [Cucumis sativus]
Csa3G000170	1730	119.37	303.18	1.34473428092422	4.74506e-243	5.53097832095808e-241	Up	GO:0016021//integral component of membrane	NA	GO:0055085//transmembrane transport	K07088//uncharacterized protein	gi|449456887|ref|XP_004146180.1|//PREDICTED: uncharacterized transporter YBR287W-like [Cucumis sativus]
Csa6G046420	3636	5.94	15.05	1.3412286508463	1.612836e-28	1.96960260828105e-27	Up	GO:0031224//intrinsic component of membrane	GO:0046872//metal ion binding;GO:0042625//ATPase coupled ion transmembrane transporter activity;GO:0032559//adenyl ribonucleotide binding;GO:0005548//phospholipid transporter activity	GO:0006869//lipid transport;GO:0009206//purine ribonucleoside triphosphate biosynthetic process	K14802//phospholipid-transporting ATPase [EC:3.6.3.1]	gi|778710490|ref|XP_004140921.2|//PREDICTED: phospholipid-transporting ATPase 1 [Cucumis sativus]
Csa3G645980	1374	6.11	15.48	1.34116118632568	8.17944e-12	4.76566833403173e-11	Up	NA	GO:0003973//(S)-2-hydroxy-acid oxidase activity;GO:0000166//nucleotide binding	GO:0008152//metabolic process	K11517//(S)-2-hydroxy-acid oxidase [EC:1.1.3.15]	gi|700203327|gb|KGN58460.1|//hypothetical protein Csa_3G645980 [Cucumis sativus]
Csa4G411390	1557	4.43	11.22	1.34069407205377	8.02778e-10	4.0726808829815e-09	Up	NA	NA	NA	K18134//protein O-GlcNAc transferase [EC:2.4.1.255]	gi|778694574|ref|XP_004151727.2|//PREDICTED: EGF domain-specific O-linked N-acetylglucosamine transferase-like [Cucumis sativus]
Csa1G065410	1801	10.11	25.60	1.34036081298435	7.04996e-22	6.84803000798403e-21	Up	GO:0016021//integral component of membrane	NA	NA	NA	gi|449454696|ref|XP_004145090.1|//PREDICTED: uncharacterized protein LOC101208650 [Cucumis sativus]
Csa1G575040	237	44.14	111.66	1.33895392650069	1.02263e-10	5.52651737368129e-10	Up	NA	NA	NA	NA	gi|700211092|gb|KGN66188.1|//hypothetical protein Csa_1G575040 [Cucumis sativus]
Csa2G129150	1372	104.37	263.87	1.3381202518086	9.95038e-174	8.03709946390041e-172	Up	NA	GO:0016408//C-acyltransferase activity;GO:0016747//transferase activity, transferring acyl groups other than amino-acyl groups	NA	K07513//acetyl-CoA acyltransferase 1 [EC:2.3.1.16]	gi|449442365|ref|XP_004138952.1|//PREDICTED: 3-ketoacyl-CoA thiolase 2, peroxisomal-like [Cucumis sativus]
BGI_novel_G000562	263	28.25	71.42	1.33807726639615	2.97928e-08	1.32710902700229e-07	Up	NA	GO:0003743//translation initiation factor activity	GO:0006413//translational initiation	K11593//eukaryotic translation initiation factor 2C	gi|659071857|ref|XP_008462248.1|//PREDICTED: protein argonaute 5 [Cucumis melo]
Csa7G452210	2331	1.77	4.47	1.33652547110032	1.917622e-06	7.10611647667999e-06	Up	NA	NA	NA	K04733//interleukin-1 receptor-associated kinase 4 [EC:2.7.11.1];K16224//senescence-induced receptor-like serine/threonine-protein kinase	gi|700190333|gb|KGN45566.1|//hypothetical protein Csa_7G452210 [Cucumis sativus]
Csa5G608120	1185	2.21	5.58	1.33621875243776	0.0001998416	0.000579662730680972	Up	NA	NA	NA	NA	gi|449435268|ref|XP_004135417.1|//PREDICTED: uncharacterized protein LOC101216291 [Cucumis sativus]
Csa1G043190	1357	17.09	43.15	1.33620816239018	1.271952e-28	1.55918247052897e-27	Up	NA	NA	NA	K03868//RING-box protein 1	gi|449439517|ref|XP_004137532.1|//PREDICTED: putative GEM-like protein 8 isoform X1 [Cucumis sativus];gi|778657529|ref|XP_011651054.1|//PREDICTED: GEM-like protein 4 isoform X2 [Cucumis sativus]
Csa3G826700	2073	5.30	13.38	1.3360138511909	6.75268e-15	4.70801106303725e-14	Up	NA	NA	NA	NA	gi|778685572|ref|XP_011652238.1|//PREDICTED: uncharacterized protein LOC101211770 [Cucumis sativus]
Csa5G611730	798	13.63	34.39	1.33520355372158	6.0989e-14	4.03401927964662e-13	Up	NA	NA	GO:0008152//metabolic process	NA	gi|449434550|ref|XP_004135059.1|//PREDICTED: putative methyltransferase DDB_G0268948 [Cucumis sativus]
Csa3G856010	2649	8.05	20.31	1.33512955129417	8.62732e-28	1.02652451784841e-26	Up	NA	GO:0003824//catalytic activity	NA	K04733//interleukin-1 receptor-associated kinase 4 [EC:2.7.11.1];K13459//disease resistance protein RPS2	gi|449460094|ref|XP_004147781.1|//PREDICTED: probable LRR receptor-like serine/threonine-protein kinase At2g16250 [Cucumis sativus]
Csa1G267230	1137	23.76	59.91	1.33426199736436	2.93668e-33	4.09787905949821e-32	Up	NA	GO:0016798//hydrolase activity, acting on glycosyl bonds	GO:0008152//metabolic process	K01183//chitinase [EC:3.2.1.14]	gi|449457929|ref|XP_004146700.1|//PREDICTED: acidic mammalian chitinase-like [Cucumis sativus]
Csa4G097630	1599	14.40	36.26	1.33231011341448	4.87918e-29	6.04571087714831e-28	Up	NA	NA	NA	K00850//6-phosphofructokinase 1 [EC:2.7.1.11]	gi|449438819|ref|XP_004137185.1|//PREDICTED: ATP-dependent 6-phosphofructokinase 5, chloroplastic [Cucumis sativus]
Csa3G848860	546	5.35	13.46	1.33106761332181	0.0001700694	0.000498354800602138	Up	NA	NA	NA	K12638//3-epi-6-deoxocathasterone 23-monooxygenase [EC:1.14.13.112]	gi|778686245|ref|XP_011652356.1|//PREDICTED: PRA1 family protein F2 [Cucumis sativus]
Csa1G023070	938	358.26	900.22	1.32927064258677	0	0	Up	NA	NA	NA	NA	gi|449440941|ref|XP_004138242.1|//PREDICTED: uncharacterized protein LOC101219468 [Cucumis sativus]
Csa1G181380	618	5.51	13.84	1.32871971906557	4.26892e-05	0.00013624987165109	Up	NA	NA	NA	NA	gi|449443524|ref|XP_004139527.1|//PREDICTED: uncharacterized protein LOC101215830 [Cucumis sativus]
Csa3G523580	978	61.40	154.22	1.32867931239038	2.67406e-70	7.82755668571428e-69	Up	NA	NA	NA	K13126//polyadenylate-binding protein;K05941//glutathione gamma-glutamylcysteinyltransferase [EC:2.3.2.15]	gi|449466123|ref|XP_004150776.1|//PREDICTED: NAC domain-containing protein 21/22-like isoform X1 [Cucumis sativus]
Csa2G000730	774	16.08	40.38	1.32837350415255	1.627998e-15	1.17677716554029e-14	Up	NA	NA	NA	K02866//large subunit ribosomal protein L10e;K11340//actin-like protein 6A	gi|449446542|ref|XP_004141030.1|//PREDICTED: acid phosphatase 1-like [Cucumis sativus]
Csa1G522000	1470	21.01	52.76	1.3283684025785	5.89288e-38	9.21371904257028e-37	Up	NA	GO:0008422//beta-glucosidase activity;GO:0043167//ion binding	GO:0044238//primary metabolic process	K15429//tRNA (guanine37-N1)-methyltransferase [EC:2.1.1.228];K19619//tyrosyl-DNA phosphodiesterase 2 [EC:3.1.4.-];K13098//RNA-binding protein FUS	gi|778661465|ref|XP_011658156.1|//PREDICTED: glucan endo-1,3-beta-glucosidase [Cucumis sativus]
Csa1G613540	4419	17.39	43.59	1.32573927104741	6.0899e-88	2.26232811832061e-86	Up	NA	GO:0009055//electron carrier activity;GO:0016614//oxidoreductase activity, acting on CH-OH group of donors;GO:0051537//2 iron, 2 sulfur cluster binding;GO:0016727//oxidoreductase activity, acting on CH or CH2 groups, oxygen as acceptor;GO:0005506//iron ion binding;GO:0046914//transition metal ion binding;GO:0050660//flavin adenine dinucleotide binding;GO:0051536//iron-sulfur cluster binding;GO:00…	GO:0008152//metabolic process;GO:0055114//oxidation-reduction process	K00106//xanthine dehydrogenase/oxidase [EC:1.17.1.4 1.17.3.2]	gi|449442519|ref|XP_004139029.1|//PREDICTED: xanthine dehydrogenase 1 [Cucumis sativus]
Csa3G727960	606	29.01	72.70	1.32540506860896	1.342008e-20	1.23866892972973e-19	Up	NA	NA	NA	K13448//calcium-binding protein CML	gi|449439789|ref|XP_004137668.1|//PREDICTED: calcium-binding protein CML42 [Cucumis sativus]
Csa3G745000	1452	3.06	7.65	1.32192809488736	1.401608e-06	5.27017603399652e-06	Up	NA	NA	NA	K13496//UDP-glucosyl transferase 73C [EC:2.4.1.-]	gi|700203883|gb|KGN59016.1|//hypothetical protein Csa_3G745000 [Cucumis sativus]
Csa6G496990	795	156.50	390.54	1.31930766290271	1.697734e-138	1.05923365525641e-136	Up	NA	GO:0003677//DNA binding	GO:0006351//transcription, DNA-templated	K09338//homeobox-leucine zipper protein	gi|449451343|ref|XP_004143421.1|//PREDICTED: homeobox-leucine zipper protein HAT22-like [Cucumis sativus]
Csa6G507370	555	429.52	1070.77	1.31785140922766	6.49126e-249	7.8974291975e-247	Up	NA	NA	NA	K11996//adenylyltransferase and sulfurtransferase [EC:2.7.7.80];K15692//E3 ubiquitin-protein ligase RNF13 [EC:2.3.2.27]	gi|449434108|ref|XP_004134838.1|//PREDICTED: thiosulfate sulfurtransferase 16, chloroplastic [Cucumis sativus]
Csa2G403720	3165	5.80	14.45	1.31694468737311	2.47472e-23	2.56511712034079e-22	Up	GO:0005622//intracellular	GO:0015035//protein disulfide oxidoreductase activity;GO:0009055//electron carrier activity	GO:0035556//intracellular signal transduction;GO:0055114//oxidation-reduction process;GO:0045454//cell redox homeostasis	K17046//protein DEK;K20495;K11294//nucleolin	gi|449442078|ref|XP_004138809.1|//PREDICTED: uncharacterized protein LOC101216716 [Cucumis sativus]
Csa5G184280	1340	5.20	12.95	1.31636856954546	7.55522e-09	3.54214625529865e-08	Up	NA	GO:0016741//transferase activity, transferring one-carbon groups;GO:0008168//methyltransferase activity	GO:0006730//one-carbon metabolic process;GO:0032259//methylation	K19306//18S rRNA (guanine1575-N7)-methyltransferase [EC:2.1.1.309]	gi|449465850|ref|XP_004150640.1|//PREDICTED: probable 18S rRNA (guanine-N(7))-methyltransferase [Cucumis sativus]
Csa6G014640	3932	31.05	77.32	1.31624836910339	4.1514e-141	2.68475589368771e-139	Up	NA	NA	NA	K12472//epidermal growth factor receptor substrate 15	gi|778709716|ref|XP_011656443.1|//PREDICTED: uncharacterized protein LOC105435747 [Cucumis sativus]
Csa3G112770	1013	15.93	39.63	1.31484670044267	1.649406e-15	1.19180910155902e-14	Up	GO:0005840//ribosome;GO:0030529//intracellular ribonucleoprotein complex	GO:0005198//structural molecule activity;GO:0003735//structural constituent of ribosome	GO:0010467//gene expression;GO:0006412//translation	K02877//large subunit ribosomal protein L15e	gi|449458361|ref|XP_004146916.1|//PREDICTED: 60S ribosomal protein L15-1 [Cucumis sativus]
Csa7G017160	2190	9.31	23.16	1.31478218043044	4.86256e-28	5.83927161998766e-27	Up	NA	GO:0032559//adenyl ribonucleotide binding;GO:0004672//protein kinase activity;GO:0031406//carboxylic acid binding	GO:0006464//cellular protein modification process	K04424//sterile alpha motif and leucine zipper containing kinase AZK [EC:2.7.11.25];K14510//serine/threonine-protein kinase CTR1 [EC:2.7.11.1];K17535//serine/threonine-protein kinase TNNI3K [EC:2.7.11.1];K04365//B-Raf proto-oncogene serine/threonine-protein kinase [EC:2.7.11.1]	gi|700188049|gb|KGN43282.1|//hypothetical protein Csa_7G017160 [Cucumis sativus];gi|449454245|ref|XP_004144866.1|//PREDICTED: serine/threonine-protein kinase HT1 isoform X1 [Cucumis sativus]
Csa1G538280	2177	10.17	25.29	1.31424735780574	9.31192e-30	1.17552421997406e-28	Up	GO:0016021//integral component of membrane	GO:0015171//amino acid transmembrane transporter activity	GO:0003333//amino acid transmembrane transport	K03294//basic amino acid/polyamine antiporter, APA family	gi|449435540|ref|XP_004135553.1|//PREDICTED: cationic amino acid transporter 1-like [Cucumis sativus]
BGI_novel_G000264	792	30.72	76.32	1.31288295528436	3.72902e-28	4.50025439057657e-27	Up	NA	NA	GO:0006952//defense response;GO:0009607//response to biotic stimulus	NA	gi|449449130|ref|XP_004142318.1|//PREDICTED: MLP-like protein 34 [Cucumis sativus]
Csa3G510960	1014	6.70	16.64	1.31242243279596	4.64218e-09	2.21590671603727e-08	Up	NA	NA	NA	K09338//homeobox-leucine zipper protein	gi|778681455|ref|XP_004149840.2|//PREDICTED: homeobox-leucine zipper protein HAT22 [Cucumis sativus]
Csa3G849900	3541	7.87	19.54	1.3119949264609	8.79464e-34	1.24597134090247e-32	Up	NA	NA	NA	K05387//glutamate receptor, ionotropic, plant	gi|700204701|gb|KGN59834.1|//hypothetical protein Csa_3G849900 [Cucumis sativus];gi|778686263|ref|XP_004146855.2|//PREDICTED: glutamate receptor 2.7-like [Cucumis sativus]
Csa2G010250	1353	22.63	56.18	1.31182003985951	2.26056e-36	3.42177767962675e-35	Up	NA	NA	NA	NA	gi|700205670|gb|KGN60789.1|//hypothetical protein Csa_2G010250 [Cucumis sativus]
Csa1G589720	1602	2.84	7.05	1.31173232778147	1.197032e-06	4.53335115019455e-06	Up	NA	NA	NA	K08790//serine/threonine kinase 38 [EC:2.7.11.1]	gi|449452743|ref|XP_004144118.1|//PREDICTED: serine/threonine-protein kinase tricorner isoform X1 [Cucumis sativus]
Csa7G262900	801	5.65	14.02	1.31116357670807	2.36136e-06	8.6516532580463e-06	Up	NA	NA	NA	NA	gi|700189108|gb|KGN44341.1|//hypothetical protein Csa_7G262900 [Cucumis sativus]
Csa2G354950	3174	1.56	3.87	1.31078753728216	3.08784e-07	1.23959359538049e-06	Up	NA	GO:0016301//kinase activity	NA	K13428//LRR receptor-like serine/threonine-protein kinase EFR [EC:2.7.11.1]	gi|778671043|ref|XP_004143019.2|//PREDICTED: probable LRR receptor-like serine/threonine-protein kinase At3g47570 [Cucumis sativus]
Csa4G001910	957	23.50	58.25	1.30959729297664	1.939014e-26	2.21897980740741e-25	Up	NA	GO:0003824//catalytic activity	NA	K01259//proline iminopeptidase [EC:3.4.11.5];K08726//soluble epoxide hydrolase / lipid-phosphate phosphatase [EC:3.3.2.10 3.1.3.76]	gi|449469068|ref|XP_004152243.1|//PREDICTED: bifunctional epoxide hydrolase 2-like [Cucumis sativus]
Csa1G025020	567	75.52	187.18	1.30949562278912	4.7095e-46	8.90914742468416e-45	Up	NA	NA	NA	K13448//calcium-binding protein CML	gi|449439129|ref|XP_004137340.1|//PREDICTED: probable calcium-binding protein CML27 [Cucumis sativus]
Csa3G681130	672	35.17	87.12	1.3086586190916	1.050644e-26	1.20873735839244e-25	Up	NA	NA	NA	K06950//uncharacterized protein	gi|449464036|ref|XP_004149735.1|//PREDICTED: uncharacterized protein LOC101220469 [Cucumis sativus]
Csa3G852460	957	13.99	34.61	1.30679297900069	2.8657e-16	2.1496615105973e-15	Up	NA	GO:0003676//nucleic acid binding	NA	K02437//glycine cleavage system H protein;K13126//polyadenylate-binding protein;K00162//pyruvate dehydrogenase E1 component beta subunit [EC:1.2.4.1];K05941//glutathione gamma-glutamylcysteinyltransferase [EC:2.3.2.15]	gi|449460147|ref|XP_004147807.1|//PREDICTED: NAC domain-containing protein 18-like [Cucumis sativus]
Csa4G056750	2231	156.27	386.18	1.3052326071042	0	0	Up	NA	NA	NA	K03294//basic amino acid/polyamine antiporter, APA family;K15095//(+)-neomenthol dehydrogenase [EC:1.1.1.208]	gi|659101974|ref|XP_008451887.1|//PREDICTED: root phototropism protein 2 isoform X1 [Cucumis melo];gi|700198329|gb|KGN53487.1|//hypothetical protein Csa_4G056750 [Cucumis sativus]
Csa3G077600	1560	55.78	137.71	1.30381348707157	1.757828e-99	7.62090865211581e-98	Up	NA	GO:0046872//metal ion binding;GO:0004674//protein serine/threonine kinase activity;GO:0032559//adenyl ribonucleotide binding	GO:0006464//cellular protein modification process	K13412//calcium-dependent protein kinase [EC:2.7.11.1]	gi|449470453|ref|XP_004152931.1|//PREDICTED: calcium-dependent protein kinase-like [Cucumis sativus]
Csa1G085390	1598	63.09	155.62	1.30254422888471	7.40976e-122	4.02900525586592e-120	Up	NA	NA	NA	K14794//ribosomal RNA-processing protein 12;K12309//beta-galactosidase [EC:3.2.1.23]	gi|449462075|ref|XP_004148767.1|//PREDICTED: protein indeterminate-domain 2 [Cucumis sativus];gi|700209647|gb|KGN64743.1|//hypothetical protein Csa_1G085390 [Cucumis sativus]
Csa3G728100	1653	7.60	18.73	1.3012795759121	1.078438e-15	7.85955601198053e-15	Up	NA	GO:0032559//adenyl ribonucleotide binding;GO:0016301//kinase activity	GO:0006464//cellular protein modification process	K04733//interleukin-1 receptor-associated kinase 4 [EC:2.7.11.1];K04730//interleukin-1 receptor-associated kinase 1 [EC:2.7.11.1]	gi|449439805|ref|XP_004137676.1|//PREDICTED: probable serine/threonine-protein kinase NAK isoform X2 [Cucumis sativus]
Csa5G606830	1137	14.87	36.63	1.30062105365614	3.32864e-20	3.00953582164422e-19	Up	NA	NA	NA	K15639//PHYB activation tagged suppressor 1 [EC:1.14.-.-]	gi|700196816|gb|KGN51993.1|//hypothetical protein Csa_5G606830 [Cucumis sativus]
Csa3G698470	669	8.16	20.09	1.2998365067618	3.77634e-07	1.50112792403512e-06	Up	NA	GO:0032561//guanyl ribonucleotide binding	GO:0006810//transport;GO:0035556//intracellular signal transduction	K07904//Ras-related protein Rab-11A	gi|449463769|ref|XP_004149604.1|//PREDICTED: ras-related protein RABA4c [Cucumis sativus]
Csa5G429990	1911	5.19	12.77	1.29895208134484	9.62978e-13	5.96794961731933e-12	Up	NA	NA	NA	K04733//interleukin-1 receptor-associated kinase 4 [EC:2.7.11.1];K04730//interleukin-1 receptor-associated kinase 1 [EC:2.7.11.1]	gi|449445182|ref|XP_004140352.1|//PREDICTED: probable inactive receptor kinase At3g02880 [Cucumis sativus]
Csa5G150390	2411	40.62	99.79	1.29670501006424	8.97296e-94	3.60883552396694e-92	Up	NA	GO:0003824//catalytic activity	GO:0008152//metabolic process	K01897//long-chain acyl-CoA synthetase [EC:6.2.1.3]	gi|700194844|gb|KGN50021.1|//hypothetical protein Csa_5G150390 [Cucumis sativus];gi|449452241|ref|XP_004143868.1|//PREDICTED: long chain acyl-CoA synthetase 4-like [Cucumis sativus]
Csa2G138740	1746	4.71	11.57	1.29658989949471	1.02263e-10	5.52805209108581e-10	Up	NA	NA	NA	K04730//interleukin-1 receptor-associated kinase 1 [EC:2.7.11.1]	gi|700206351|gb|KGN61470.1|//hypothetical protein Csa_2G138740 [Cucumis sativus]
Csa6G046240	702	11.61	28.48	1.29458117410083	5.54702e-10	2.84527776864295e-09	Up	NA	NA	NA	K05674//ATP-binding cassette, subfamily C (CFTR/MRP), member 10;K08869//aarF domain-containing kinase;K01184//polygalacturonase [EC:3.2.1.15];K17613//calcineurin-binding protein cabin-1	gi|449446301|ref|XP_004140910.1|//PREDICTED: transcription factor DIVARICATA [Cucumis sativus]
Csa1G002810	585	7.20	17.66	1.29441653131879	1.128228e-05	3.85232174144887e-05	Up	NA	GO:0016671//oxidoreductase activity, acting on a sulfur group of donors, disulfide as acceptor	GO:0043412//macromolecule modification	K07304//peptide-methionine (S)-S-oxide reductase [EC:1.8.4.11]	gi|449440600|ref|XP_004138072.1|//PREDICTED: peptide methionine sulfoxide reductase-like [Cucumis sativus]
Csa3G736750	1218	62.06	152.08	1.29309483511983	6.68758e-84	2.33717113608618e-82	Up	NA	NA	NA	K02930//large subunit ribosomal protein L4e	gi|449440055|ref|XP_004137800.1|//PREDICTED: 60S ribosomal protein L4 [Cucumis sativus]
Csa3G889170	333	23.26	56.96	1.29209804949318	1.917322e-08	8.67967210511628e-08	Up	GO:0044464//cell part	NA	NA	NA	gi|449437024|ref|XP_004136292.1|//PREDICTED: uncharacterized protein LOC101214135 [Cucumis sativus]
Csa7G432280	1572	23.28	56.93	1.29009804148286	7.9416e-42	1.37659114514693e-40	Up	NA	GO:0016301//kinase activity	GO:0006071//glycerol metabolic process;GO:0006796//phosphate-containing compound metabolic process	K00864//glycerol kinase [EC:2.7.1.30]	gi|449436162|ref|XP_004135863.1|//PREDICTED: glycerol kinase [Cucumis sativus]
Csa2G372800	1942	74.92	183.21	1.29007544632136	1.66622e-138	1.04291442186495e-136	Up	NA	GO:0003950//NAD+ ADP-ribosyltransferase activity	NA	K13459//disease resistance protein RPS2	gi|449461341|ref|XP_004148400.1|//PREDICTED: probable inactive poly [ADP-ribose] polymerase SRO3 [Cucumis sativus]
Csa6G507310	3455	29.76	72.70	1.28858083769893	1.786032e-110	8.60566804752475e-109	Up	NA	GO:0003994//aconitate hydratase activity;GO:0016836//hydro-lyase activity;GO:0051539//4 iron, 4 sulfur cluster binding;GO:0051536//iron-sulfur cluster binding	GO:0008152//metabolic process	K01681//aconitate hydratase [EC:4.2.1.3]	gi|700193754|gb|KGN48958.1|//Aconitase [Cucumis sativus];gi|449434116|ref|XP_004134842.1|//PREDICTED: aconitate hydratase [Cucumis sativus]
Csa6G513470	1149	7.61	18.59	1.28855841141594	6.38874e-11	3.50714080203046e-10	Up	NA	NA	NA	K12471//epsin;K17710//pentatricopeptide repeat domain-containing protein 1	gi|449433986|ref|XP_004134777.1|//PREDICTED: uncharacterized protein LOC101222689 [Cucumis sativus]
Csa2G286490	1092	23.41	57.14	1.28737610182436	6.1514e-29	7.60273983492063e-28	Up	NA	GO:0032559//adenyl ribonucleotide binding;GO:0004672//protein kinase activity	GO:0006464//cellular protein modification process	K14498//serine/threonine-protein kinase SRK2 [EC:2.7.11.1]	gi|659115935|ref|XP_008457815.1|//PREDICTED: serine/threonine-protein kinase SRK2I [Cucumis melo]
Csa4G011770	717	182.94	446.42	1.28703110641232	8.33168e-136	5.10014097106918e-134	Up	NA	NA	NA	K13126//polyadenylate-binding protein;K00162//pyruvate dehydrogenase E1 component beta subunit [EC:1.2.4.1];K05941//glutathione gamma-glutamylcysteinyltransferase [EC:2.3.2.15]	gi|449468834|ref|XP_004152126.1|//PREDICTED: NAC transcription factor 25 [Cucumis sativus]
Csa3G001760	1218	6.04	14.72	1.28515721673193	2.1153e-09	1.03823574886536e-08	Up	NA	GO:0004713//protein tyrosine kinase activity;GO:0032559//adenyl ribonucleotide binding	GO:0006464//cellular protein modification process	K00924;K04733//interleukin-1 receptor-associated kinase 4 [EC:2.7.11.1]	gi|778674595|ref|XP_004146212.2|//PREDICTED: probable serine/threonine-protein kinase Cx32, chloroplastic isoform X1 [Cucumis sativus]
Csa1G633410	1134	9.82	23.92	1.28442245988341	1.942818e-13	1.25435804935323e-12	Up	NA	GO:0003824//catalytic activity	NA	K11108//RNA 3'-terminal phosphate cyclase-like protein	gi|449442617|ref|XP_004139077.1|//PREDICTED: probable RNA 3'-terminal phosphate cyclase-like protein [Cucumis sativus]
Csa3G126870	477	14.93	36.36	1.28413803405957	1.854344e-08	8.40238833891992e-08	Up	NA	NA	NA	NA	NA
Csa2G348970	6162	4.19	10.20	1.28354700315951	9.786e-31	1.27250685370741e-29	Up	GO:0016021//integral component of membrane	GO:0004674//protein serine/threonine kinase activity;GO:0005524//ATP binding;GO:0032559//adenyl ribonucleotide binding;GO:0004672//protein kinase activity	GO:0006464//cellular protein modification process;GO:0006468//protein phosphorylation	K04733//interleukin-1 receptor-associated kinase 4 [EC:2.7.11.1]	gi|778670540|ref|XP_011649491.1|//PREDICTED: cysteine-rich receptor-like protein kinase 2 [Cucumis sativus];gi|778670543|ref|XP_011649492.1|//PREDICTED: cysteine-rich receptor-like protein kinase 2 isoform X1 [Cucumis sativus]
Csa2G021720	2188	1.36	3.31	1.28322456555688	6.87088e-05	0.000212941490335934	Up	NA	NA	NA	K03283//heat shock 70kDa protein 1/8;K19613//leucine-rich repeat protein SHOC2	gi|700205782|gb|KGN60901.1|//hypothetical protein Csa_2G021720 [Cucumis sativus];gi|778666797|ref|XP_011648811.1|//PREDICTED: toll/interleukin-1 receptor-like protein isoform X2 [Cucumis sativus]
Csa7G073780	1101	13.88	33.78	1.28316176022312	8.33476e-18	6.67947460518732e-17	Up	NA	NA	NA	NA	gi|449438426|ref|XP_004136989.1|//PREDICTED: uncharacterized protein LOC101207472 [Cucumis sativus]
Csa4G017160	1796	10.44	25.33	1.27872536514262	1.56344e-14	1.0716170084507e-13	Up	NA	NA	NA	NA	gi|449468740|ref|XP_004152079.1|//PREDICTED: protein CMSS1 [Cucumis sativus]
Csa2G382490	2392	25.83	62.61	1.27734545776299	3.3753e-69	9.61985209370424e-68	Up	NA	NA	NA	K16670//homeobox protein Meis2;K15613//homeobox protein Meis1	gi|700207857|gb|KGN62976.1|//hypothetical protein Csa_2G382490 [Cucumis sativus];gi|778672603|ref|XP_011649837.1|//PREDICTED: homeobox protein knotted-1-like 3 isoform X2 [Cucumis sativus];gi|449441886|ref|XP_004138713.1|//PREDICTED: homeobox protein knotted-1-like 3 isoform X1 [Cucumis sativus]
Csa4G008790	1342	69.95	169.42	1.27620823210636	1.042522e-64	2.74610734127199e-63	Up	NA	NA	NA	K16297//serine carboxypeptidase-like clade II [EC:3.4.16.-]	gi|778689763|ref|XP_011653014.1|//PREDICTED: uncharacterized protein LOC101204328 isoform X1 [Cucumis sativus];gi|449468896|ref|XP_004152157.1|//PREDICTED: uncharacterized protein LOC101204328 isoform X2 [Cucumis sativus]
Csa6G538800	2365	8.01	19.40	1.27618250466578	4.53652e-23	4.64778412210526e-22	Up	NA	GO:0016879//ligase activity, forming carbon-nitrogen bonds;GO:0005524//ATP binding;GO:0003883//CTP synthase activity	GO:0006541//glutamine metabolic process;GO:0006220//pyrimidine nucleotide metabolic process;GO:0044210//'de novo' CTP biosynthetic process	K01937//CTP synthase [EC:6.3.4.2]	gi|778721929|ref|XP_011658374.1|//PREDICTED: CTP synthase [Cucumis sativus]
Csa1G051810	1620	124.05	300.26	1.27529055969362	1.264574e-215	1.24324229717172e-213	Up	GO:0043231//intracellular membrane-bounded organelle;GO:0044425//membrane part	GO:0046872//metal ion binding	NA	K08054//calnexin	gi|449473880|ref|XP_004154010.1|//PREDICTED: calnexin homolog [Cucumis sativus]
Csa7G259360	765	49.51	119.82	1.27507688420297	6.93258e-40	1.14948553901193e-38	Up	NA	NA	NA	K06699//proteasome activator subunit 4;K12472//epidermal growth factor receptor substrate 15	gi|700189103|gb|KGN44336.1|//hypothetical protein Csa_7G259360 [Cucumis sativus]
Csa3G639040	1599	38.81	93.72	1.27192852107769	1.910318e-67	5.27464541673759e-66	Up	NA	GO:0032559//adenyl ribonucleotide binding;GO:0042623//ATPase activity, coupled	NA	K14811//ATP-dependent RNA helicase DBP3 [EC:3.6.4.13]	gi|449453334|ref|XP_004144413.1|//PREDICTED: DEAD-box ATP-dependent RNA helicase 5 [Cucumis sativus]
BGI_novel_G000026	1342	8.52	20.57	1.2716164582991	1.718492e-13	1.1154439903968e-12	Up	NA	NA	NA	K00512//steroid 17alpha-monooxygenase / 17alpha-hydroxyprogesterone aldolase [EC:1.14.14.19 4.1.2.30]	gi|778664798|ref|XP_011660355.1|//PREDICTED: cytochrome P450 71A1-like [Cucumis sativus]
Csa3G168930	1956	7.75	18.70	1.2707700546134	8.63436e-18	6.90819777065351e-17	Up	NA	NA	NA	K02986//small subunit ribosomal protein S4;K11593//eukaryotic translation initiation factor 2C	gi|778679111|ref|XP_011651089.1|//PREDICTED: alkaline/neutral invertase A, mitochondrial [Cucumis sativus]
Csa2G234520	957	19.14	46.10	1.26817592083067	2.83314e-20	2.56869600558919e-19	Up	NA	NA	NA	K02923//large subunit ribosomal protein L38e;K03575//A/G-specific adenine glycosylase [EC:3.2.2.-];K14493//gibberellin receptor GID1 [EC:3.-.-.-];K17872//NADH:ubiquinone reductase (non-electrogenic) [EC:1.6.5.9];K13258//2-hydroxyisoflavanone dehydratase [EC:4.2.1.105]	gi|449474681|ref|XP_004154254.1|//PREDICTED: probable carboxylesterase 13 [Cucumis sativus]
Csa7G447160	1878	1.47	3.54	1.26793320524663	0.000245784	0.000702662849757674	Up	NA	NA	NA	K19626//inversin;K19044//E3 ubiquitin-protein ligase XBAT32/33 [EC:2.3.2.27];K06694//26S proteasome non-ATPase regulatory subunit 10	gi|449448162|ref|XP_004141835.1|//PREDICTED: ankyrin repeat-containing protein At5g02620-like [Cucumis sativus]
BGI_novel_G000442	2220	2.06	4.96	1.26769578320366	2.45738e-06	8.98485332081142e-06	Up	NA	NA	NA	K01148//poly(A)-specific ribonuclease [EC:3.1.13.4]	gi|449462471|ref|XP_004148964.1|//PREDICTED: poly(A)-specific ribonuclease PARN-like [Cucumis sativus]
Csa6G187390	1964	18.45	44.38	1.26628885124925	3.21356e-46	6.10294233756098e-45	Up	NA	NA	NA	NA	gi|449450800|ref|XP_004143150.1|//PREDICTED: uncharacterized protein LOC101211174 [Cucumis sativus]
Csa4G427270	861	25.71	61.72	1.26340845173708	9.48464e-24	9.99610190795885e-23	Up	NA	GO:0004312//fatty acid synthase activity	GO:0008152//metabolic process	K02934//large subunit ribosomal protein L6e;K00059//3-oxoacyl-[acyl-carrier protein] reductase [EC:1.1.1.100];K10256//omega-6 fatty acid desaturase / acyl-lipid omega-6 desaturase (Delta-12 desaturase) [EC:1.14.19.6 1.14.19.22]	gi|449453159|ref|XP_004144326.1|//PREDICTED: L-xylulose reductase-like [Cucumis sativus]
Csa3G914060	1506	5.08	12.19	1.26279772384805	1.864822e-09	9.18770565730195e-09	Up	NA	GO:0016787//hydrolase activity	NA	K16818//phospholipase A1 [EC:3.1.1.32]	gi|449461243|ref|XP_004148351.1|//PREDICTED: phospholipase A1-Ibeta2, chloroplastic [Cucumis sativus]
Csa4G289640	2424	2.11	5.05	1.25904038893197	7.68076e-07	2.96830800397062e-06	Up	NA	GO:0005488//binding	NA	K04733//interleukin-1 receptor-associated kinase 4 [EC:2.7.11.1];K00276//primary-amine oxidase [EC:1.4.3.21]	gi|700198988|gb|KGN54146.1|//hypothetical protein Csa_4G289640 [Cucumis sativus]
Csa6G109780	444	66.06	158.02	1.2582582917345	4.82414e-28	5.79671044691358e-27	Up	NA	NA	NA	NA	NA
Csa1G045490	1668	33.68	80.50	1.25709664482295	1.195636e-59	2.909281297e-58	Up	NA	NA	NA	K00294//1-pyrroline-5-carboxylate dehydrogenase [EC:1.2.1.88]	gi|449469464|ref|XP_004152440.1|//PREDICTED: probable aldehyde dehydrogenase [Cucumis sativus]
Csa3G073920	1377	29.33	70.06	1.25621391704511	6.97846e-43	1.23718308160291e-41	Up	GO:0044464//cell part	GO:0043167//ion binding;GO:0016798//hydrolase activity, acting on glycosyl bonds	GO:0044238//primary metabolic process	K15429//tRNA (guanine37-N1)-methyltransferase [EC:2.1.1.228];K19619//tyrosyl-DNA phosphodiesterase 2 [EC:3.1.4.-];K13098//RNA-binding protein FUS	gi|449463248|ref|XP_004149346.1|//PREDICTED: glucan endo-1,3-beta-glucosidase 13 [Cucumis sativus]
Csa6G517040	1552	4.28	10.21	1.25430016447665	5.66726e-11	3.12606639727968e-10	Up	NA	GO:0046914//transition metal ion binding;GO:0008270//zinc ion binding;GO:0003824//catalytic activity;GO:0016491//oxidoreductase activity	GO:0008152//metabolic process;GO:0055114//oxidation-reduction process	K00344//NADPH2:quinone reductase [EC:1.6.5.5];K10133//tumor protein p53-inducible protein 3 [EC:1.-.-.-]	gi|700193992|gb|KGN49196.1|//hypothetical protein Csa_6G517040 [Cucumis sativus]
Csa4G286400	2316	2.04	4.86	1.25238716163429	2.09076e-06	7.70663400113615e-06	Up	NA	NA	NA	K18999//RNA polymerase II C-terminal domain phosphatase-like 3/4 [EC:3.1.3.16]	gi|449448772|ref|XP_004142139.1|//PREDICTED: multiple C2 and transmembrane domain-containing protein 2-like [Cucumis sativus]
Csa3G750910	1065	9.85	23.45	1.251392293059	1.781578e-12	1.0820654398752e-11	Up	NA	NA	NA	K10406//kinesin family member C2/C3	gi|778684129|ref|XP_004138008.2|//PREDICTED: uncharacterized protein LOC101203134 [Cucumis sativus];gi|700203932|gb|KGN59065.1|//hypothetical protein Csa_3G750910 [Cucumis sativus]
Csa1G467120	3836	4.96	11.79	1.24915169259289	4.41532e-13	2.79053958181818e-12	Up	NA	GO:0005524//ATP binding;GO:0032559//adenyl ribonucleotide binding;GO:0004672//protein kinase activity;GO:0008270//zinc ion binding	GO:0007165//signal transduction;GO:0006464//cellular protein modification process;GO:0006468//protein phosphorylation	K06272//integrin-linked kinase [EC:2.7.11.1];K03070//preprotein translocase subunit SecA	gi|449459316|ref|XP_004147392.1|//PREDICTED: serine/threonine-protein kinase HT1 [Cucumis sativus];gi|778661108|ref|XP_011657533.1|//PREDICTED: uncharacterized protein LOC101212974 [Cucumis sativus]
Csa3G854250	543	12.96	30.79	1.24839614916019	6.39638e-08	2.76386088967813e-07	Up	NA	NA	NA	K13448//calcium-binding protein CML	gi|449460169|ref|XP_004147818.1|//PREDICTED: probable calcium-binding protein CML41 [Cucumis sativus]
Csa6G095290	1164	23.73	56.31	1.24667905035808	7.625e-27	8.80879821958457e-26	Up	GO:0016021//integral component of membrane	NA	NA	NA	gi|449467041|ref|XP_004151234.1|//PREDICTED: uncharacterized protein LOC101208751 [Cucumis sativus]
Csa6G190990	1344	39.95	94.53	1.24257675192336	6.5359e-55	1.46744901268743e-53	Up	NA	NA	NA	K19044//E3 ubiquitin-protein ligase XBAT32/33 [EC:2.3.2.27]	gi|449450716|ref|XP_004143108.1|//PREDICTED: putative E3 ubiquitin-protein ligase XBAT31 [Cucumis sativus]
Csa4G097120	2247	3.56	8.42	1.2419429921	1.152678e-09	5.78448825676721e-09	Up	NA	NA	NA	K05677//ATP-binding cassette, subfamily D (ALD), member 3	gi|700198496|gb|KGN53654.1|//hypothetical protein Csa_4G097120 [Cucumis sativus]
Csa5G622650	312	11.65	27.55	1.24172236391688	0.0003033	0.000855161906141367	Up	NA	NA	NA	NA	gi|700197073|gb|KGN52250.1|//hypothetical protein Csa_5G622650 [Cucumis sativus]
Csa3G881750	1483	20.08	47.48	1.24156066569113	1.746242e-31	2.30926268831522e-30	Up	GO:0016021//integral component of membrane	GO:0004674//protein serine/threonine kinase activity;GO:0005524//ATP binding	GO:0006468//protein phosphorylation	K04733//interleukin-1 receptor-associated kinase 4 [EC:2.7.11.1];K04730//interleukin-1 receptor-associated kinase 1 [EC:2.7.11.1]	gi|778687202|ref|XP_004136314.2|//PREDICTED: G-type lectin S-receptor-like serine/threonine-protein kinase At1g34300 [Cucumis sativus]
Csa5G165830	3549	3.03	7.16	1.24064179379131	1.55731e-12	9.50300829467085e-12	Up	NA	NA	NA	K06685//MOB kinase activator 1	gi|700195111|gb|KGN50288.1|//hypothetical protein Csa_5G165830 [Cucumis sativus];gi|778700180|ref|XP_011654825.1|//PREDICTED: putative disease resistance protein At4g19050 [Cucumis sativus]
BGI_novel_G000290	1761	2.73	6.45	1.24039820939076	3.58622e-06	1.28966115869204e-05	Up	NA	NA	NA	K00430//peroxidase [EC:1.11.1.7];K20000//maturase K;K11816//indole-3-pyruvate monooxygenase [EC:1.14.13.168];K01255//leucyl aminopeptidase [EC:3.4.11.1];K11252//histone H2B	gi|778701533|ref|XP_011655042.1|//PREDICTED: uncharacterized protein LOC101209878 [Cucumis sativus]
Csa3G183360	930	34.84	82.27	1.23962181957145	8.90402e-33	1.23188097597726e-31	Up	NA	NA	NA	K14563//rRNA 2'-O-methyltransferase fibrillarin [EC:2.1.1.-]	gi|449446011|ref|XP_004140765.1|//PREDICTED: mediator of RNA polymerase II transcription subunit 36a-like [Cucumis sativus]
Csa4G004870	363	41.97	98.98	1.23777857898109	3.70074e-14	2.47810818163055e-13	Up	NA	NA	NA	NA	gi|778697409|ref|XP_011654316.1|//PREDICTED: uncharacterized protein At1g15400-like [Cucumis sativus]
Csa7G051410	1374	2.52	5.94	1.23703919730085	9.04788e-05	0.000275713888666249	Up	NA	NA	NA	K13691//pathogen-inducible salicylic acid glucosyltransferase [EC:2.4.1.-]	gi|778724192|ref|XP_011658756.1|//PREDICTED: UDP-glycosyltransferase 74F2-like [Cucumis sativus]
Csa5G156180	771	141.80	333.89	1.23551535277793	1.121938e-103	5.05547340462963e-102	Up	NA	NA	NA	K18213//proteinaceous RNase P [EC:3.1.26.5]	gi|449452386|ref|XP_004143940.1|//PREDICTED: protein STAY-GREEN, chloroplastic-like [Cucumis sativus]
Csa6G031440	1116	3.81	8.97	1.23531698742594	1.647834e-05	5.51146677731959e-05	Up	NA	NA	NA	K14491//two-component response regulator ARR-B family	gi|778710070|ref|XP_011656513.1|//PREDICTED: probable transcription factor GLK2 [Cucumis sativus]
Csa4G064120	657	43.98	103.45	1.2340141358924	4.3682e-28	5.25858881880025e-27	Up	NA	GO:0016765//transferase activity, transferring alkyl or aryl (other than methyl) groups	GO:0009755//hormone-mediated signaling pathway	K00799//glutathione S-transferase [EC:2.5.1.18]	gi|449460054|ref|XP_004147761.1|//PREDICTED: probable glutathione S-transferase [Cucumis sativus]
Csa4G638320	765	45.82	107.71	1.23310283487968	3.04832e-34	4.36955796170839e-33	Up	GO:0043231//intracellular membrane-bounded organelle;GO:0016020//membrane;GO:0044444//cytoplasmic part	NA	NA	NA	gi|449446945|ref|XP_004141230.1|//PREDICTED: stem-specific protein TSJT1 [Cucumis sativus]
Csa3G149910	1031	59.32	139.40	1.23264005830115	1.66179e-44	3.05173623962264e-43	Up	NA	NA	NA	NA	gi|449432722|ref|XP_004134148.1|//PREDICTED: uncharacterized protein LOC101209089 [Cucumis sativus]
Csa6G404180	1188	11.03	25.92	1.23263292729324	3.05284e-14	2.05415082751469e-13	Up	NA	GO:0004713//protein tyrosine kinase activity;GO:0032559//adenyl ribonucleotide binding	GO:0006464//cellular protein modification process	K04733//interleukin-1 receptor-associated kinase 4 [EC:2.7.11.1]	gi|449458031|ref|XP_004146751.1|//PREDICTED: protein kinase 2B, chloroplastic [Cucumis sativus]
Csa2G382440	1449	2.90	6.81	1.23160189799714	1.647834e-05	5.51051995258547e-05	Up	NA	NA	NA	K07192//flotillin	gi|778672592|ref|XP_011649835.1|//PREDICTED: flotillin-like protein 4 [Cucumis sativus]
Csa4G665090	2681	2.77	6.50	1.23055374186663	1.020856e-16	7.80824475284872e-16	Up	NA	NA	NA	K04733//interleukin-1 receptor-associated kinase 4 [EC:2.7.11.1];K04730//interleukin-1 receptor-associated kinase 1 [EC:2.7.11.1]	gi|449455742|ref|XP_004145610.1|//PREDICTED: putative wall-associated receptor kinase-like 16 [Cucumis sativus];gi|700200395|gb|KGN55553.1|//hypothetical protein Csa_4G665090 [Cucumis sativus]
BGI_novel_G000083	3570	237.97	558.29	1.23023500527499	0	0	Up	GO:0016021//integral component of membrane	GO:0046872//metal ion binding;GO:0005524//ATP binding;GO:0008553//hydrogen-exporting ATPase activity, phosphorylative mechanism	GO:0006754//ATP biosynthetic process;GO:1902600//hydrogen ion transmembrane transport	K01535//H+-transporting ATPase [EC:3.6.3.6]	gi|793422870|ref|NP_001292696.1|//plasma membrane ATPase 4 [Cucumis sativus]
Csa4G038760	906	4.48	10.51	1.23019203190457	3.2604e-05	0.000105619814278582	Up	NA	NA	NA	K01870//isoleucyl-tRNA synthetase [EC:6.1.1.5]	gi|449462866|ref|XP_004149156.1|//PREDICTED: transcription repressor OFP7 [Cucumis sativus]
BGI_novel_G000382	5500	1.19	2.79	1.22930354852124	3.84776e-08	1.69496483729351e-07	Up	NA	NA	NA	K10357//myosin V	gi|778715235|ref|XP_011657369.1|//PREDICTED: myosin-15 isoform X2 [Cucumis sativus]
Csa5G175820	3214	1.90	4.45	1.22780591752281	5.85938e-06	2.06030872615607e-05	Up	GO:0016021//integral component of membrane	GO:0019139//cytokinin dehydrogenase activity;GO:0016614//oxidoreductase activity, acting on CH-OH group of donors;GO:0016645//oxidoreductase activity, acting on the CH-NH group of donors;GO:0050660//flavin adenine dinucleotide binding;GO:0050662//coenzyme binding	GO:0009690//cytokinin metabolic process;GO:0006725//cellular aromatic compound metabolic process;GO:0055114//oxidation-reduction process	K00279//cytokinin dehydrogenase [EC:1.5.99.12]	gi|449451894|ref|XP_004143695.1|//PREDICTED: cytokinin dehydrogenase 6-like [Cucumis sativus];gi|700195281|gb|KGN50458.1|//hypothetical protein Csa_5G175820 [Cucumis sativus]
Csa1G045690	864	7.51	17.55	1.22458621767765	1.764604e-07	7.29294723227176e-07	Up	GO:0015630//microtubule cytoskeleton	NA	GO:0009987//cellular process	K10418//dynein light chain LC8-type	gi|778657659|ref|XP_004152543.2|//PREDICTED: uncharacterized protein LOC101220241 [Cucumis sativus]
Csa1G039230	951	42.68	99.67	1.22359915229066	5.07604e-39	8.17288623986766e-38	Up	NA	NA	NA	K05747//Wiskott-Aldrich syndrome protein	gi|778657058|ref|XP_011650217.1|//PREDICTED: ninja-family protein 6-like [Cucumis sativus]
Csa7G343300	1131	19.97	46.59	1.22218599766448	4.2091e-22	4.13809801010101e-21	Up	NA	NA	GO:0009987//cellular process;GO:0045087//innate immune response	K13456//RPM1-interacting protein 4	gi|778726982|ref|XP_004139625.2|//PREDICTED: RPM1-interacting protein 4 [Cucumis sativus]
Csa5G139820	806	5.69	13.27	1.22166781306361	2.33152e-05	7.67682143437077e-05	Up	NA	NA	NA	NA	gi|700194727|gb|KGN49904.1|//hypothetical protein Csa_5G139820 [Cucumis sativus];gi|778698994|ref|XP_011654636.1|//PREDICTED: uncharacterized protein LOC105435427 [Cucumis sativus]
Csa6G181560	1344	10.43	24.32	1.22140407092382	6.00694e-15	4.2016203392023e-14	Up	NA	NA	NA	K11820//N-hydroxythioamide S-beta-glucosyltransferase [EC:2.4.1.195];K13691//pathogen-inducible salicylic acid glucosyltransferase [EC:2.4.1.-]	gi|449450838|ref|XP_004143169.1|//PREDICTED: UDP-glycosyltransferase 87A1-like [Cucumis sativus]
Csa5G150970	1350	7.99	18.62	1.22058566463082	8.3996e-12	4.88955184210526e-11	Up	GO:0016020//membrane	NA	NA	K13946//auxin influx carrier (AUX1 LAX family);K14209//solute carrier family 36 (proton-coupled amino acid transporter)	gi|449452255|ref|XP_004143875.1|//PREDICTED: probable GABA transporter 2 [Cucumis sativus]
Csa5G587730	2004	2.15	5.01	1.22047394360575	2.34232e-05	7.70716719405003e-05	Up	NA	NA	NA	K00655//1-acyl-sn-glycerol-3-phosphate acyltransferase [EC:2.3.1.51];K13210//far upstream element-binding protein;K01148//poly(A)-specific ribonuclease [EC:3.1.13.4]	gi|778704521|ref|XP_011655549.1|//PREDICTED: uncharacterized protein At3g15000, mitochondrial-like [Cucumis sativus];gi|700196476|gb|KGN51653.1|//hypothetical protein Csa_5G587730 [Cucumis sativus]
Csa1G039020	1292	11.56	26.93	1.22007283200099	4.30882e-17	3.35636214965986e-16	Up	NA	NA	NA	K18211//synaptosomal-associated protein 25	gi|449439301|ref|XP_004137424.1|//PREDICTED: SNAP25 homologous protein SNAP33 [Cucumis sativus]
Csa7G071520	1149	5.98	13.91	1.21790503034413	6.4951e-08	2.80402786870703e-07	Up	GO:0043234//protein complex	GO:0043169//cation binding;GO:0004721//phosphoprotein phosphatase activity	GO:0006464//cellular protein modification process	K01102//pyruvate dehydrogenase phosphatase [EC:3.1.3.43]	gi|778724905|ref|XP_011658882.1|//PREDICTED: probable protein phosphatase 2C 63 [Cucumis sativus]
BGI_novel_G000371	1751	3.85	8.95	1.21702923656935	6.4951e-08	2.80340613303769e-07	Up	NA	NA	NA	K16196//eukaryotic translation initiation factor 2-alpha kinase 4 [EC:2.7.11.1];K03942//NADH dehydrogenase (ubiquinone) flavoprotein 1 [EC:1.6.5.3 1.6.99.3];K00566//tRNA-specific 2-thiouridylase [EC:2.8.1.-];K17756//long-chain-alcohol oxidase [EC:1.1.3.20]	gi|659093726|ref|XP_008447685.1|//PREDICTED: uncharacterized protein LOC103490096 [Cucumis melo]
Csa2G301450	1101	11.60	26.96	1.21669569116692	1.91592e-13	1.23822372908367e-12	Up	NA	NA	NA	K02940//large subunit ribosomal protein L9e;K01623//fructose-bisphosphate aldolase, class I [EC:4.1.2.13]	gi|778670182|ref|XP_004147384.2|//PREDICTED: WAT1-related protein At5g64700-like [Cucumis sativus]
Csa3G731830	4599	2.02	4.69	1.21523262976358	1.05587e-07	4.47302838302503e-07	Up	NA	NA	NA	K13428//LRR receptor-like serine/threonine-protein kinase EFR [EC:2.7.11.1]	gi|700203640|gb|KGN58773.1|//hypothetical protein Csa_3G731830 [Cucumis sativus]
Csa5G239640	4020	40.33	93.61	1.21480924991738	1.459894e-153	1.01857693921147e-151	Up	NA	GO:0005488//binding;GO:0003968//RNA-directed RNA polymerase activity	GO:0001172//transcription, RNA-templated	K11699//RNA-dependent RNA polymerase [EC:2.7.7.48]	gi|525507284|ref|NP_001267682.1|//RNA-dependent RNA polymerase 1-like [Cucumis sativus]
Csa5G589260	1173	127.18	294.91	1.21340292912616	8.91416e-140	5.68927995278688e-138	Up	NA	GO:0048037//cofactor binding;GO:0016835//carbon-oxygen lyase activity	GO:0000097//sulfur amino acid biosynthetic process;GO:0006563//L-serine metabolic process	K01738//cysteine synthase A [EC:2.5.1.47]	gi|449435103|ref|XP_004135335.1|//PREDICTED: cysteine synthase [Cucumis sativus]
Csa7G069690	2958	11.05	25.62	1.21322410606285	2.62774e-33	3.67732471890726e-32	Up	NA	GO:0016301//kinase activity	NA	K00924	gi|778724724|ref|XP_011658857.1|//PREDICTED: receptor-like protein kinase HAIKU2 [Cucumis sativus]
Csa4G618410	216	32.74	75.90	1.21304556382868	4.3138e-06	1.53767498260392e-05	Up	NA	NA	NA	NA	gi|700199818|gb|KGN54976.1|//hypothetical protein Csa_4G618410 [Cucumis sativus]
Csa2G264570	438	43.69	101.25	1.21254689710249	2.7858e-17	2.18310719806763e-16	Up	NA	NA	NA	K03686//molecular chaperone DnaJ	gi|778674187|ref|XP_004147068.2|//PREDICTED: chaperone protein dnaJ 11, chloroplastic-like [Cucumis sativus]
Csa6G517070	1774	6.09	14.09	1.2101574784033	2.16184e-10	1.14044383306233e-09	Up	NA	GO:0001727//lipid kinase activity;GO:0016301//kinase activity	GO:0007186//G-protein coupled receptor signaling pathway;GO:0016310//phosphorylation;GO:0006796//phosphate-containing compound metabolic process	K04718//sphingosine kinase [EC:2.7.1.91]	gi|449434352|ref|XP_004134960.1|//PREDICTED: sphingosine kinase 1 isoform X1 [Cucumis sativus]
Csa2G223160	1786	2.36	5.46	1.21011409155801	0.000246658	0.00070485094362889	Up	GO:0016020//membrane	GO:0008168//methyltransferase activity;GO:0008172//S-methyltransferase activity	GO:0006730//one-carbon metabolic process;GO:0032259//methylation	K00547//homocysteine S-methyltransferase [EC:2.1.1.10]	gi|449455288|ref|XP_004145385.1|//PREDICTED: homocysteine S-methyltransferase 3 [Cucumis sativus]
Csa1G042500	2046	1.86	4.30	1.20903403848143	7.70572e-05	0.000236928677175802	Up	GO:0016021//integral component of membrane	GO:0004674//protein serine/threonine kinase activity;GO:0005524//ATP binding;GO:0030247//polysaccharide binding	GO:0006468//protein phosphorylation	K04733//interleukin-1 receptor-associated kinase 4 [EC:2.7.11.1];K04730//interleukin-1 receptor-associated kinase 1 [EC:2.7.11.1]	gi|778657279|ref|XP_011650595.1|//PREDICTED: probable receptor-like protein kinase At1g67000 [Cucumis sativus]
Csa3G112250	2063	2.77	6.40	1.20818592883817	1.332112e-06	5.01758749845201e-06	Up	GO:0016020//membrane	NA	NA	K14638//solute carrier family 15 (peptide/histidine transporter), member 3/4	gi|645223465|ref|XP_008218643.1|//PREDICTED: protein NRT1/ PTR FAMILY 4.3-like [Prunus mume];gi|449431892|ref|XP_004133734.1|//PREDICTED: protein NRT1/ PTR FAMILY 4.3 [Cucumis sativus]
Csa7G440550	585	15.98	36.91	1.20774432931763	1.695394e-09	8.37840558618939e-09	Up	NA	NA	NA	K14484//auxin-responsive protein IAA	gi|449436092|ref|XP_004135828.1|//PREDICTED: auxin-induced protein IAA6 [Cucumis sativus]
BGI_novel_G000187	5927	2.81	6.49	1.20764834777821	7.25138e-18	5.83286624297521e-17	Up	NA	GO:0005086//ARF guanyl-nucleotide exchange factor activity	GO:0032012//regulation of ARF protein signal transduction;GO:0043547//positive regulation of GTPase activity	K18443//golgi-specific brefeldin A-resistance guanine nucleotide exchange factor 1	gi|778682679|ref|XP_011651757.1|//PREDICTED: ARF guanine-nucleotide exchange factor GNOM-like [Cucumis sativus]
Csa6G318710	735	22.61	52.22	1.20764146556131	3.2295e-16	2.41418767281106e-15	Up	NA	NA	NA	K19038//E3 ubiquitin-protein ligase ATL41 [EC:2.3.2.27];K19041//E3 ubiquitin-protein ligase RNF38/44 [EC:2.3.2.27];K10664//E3 ubiquitin-protein ligase ATL6/9/15/31/42/55 [EC:2.3.2.27]	gi|449465577|ref|XP_004150504.1|//PREDICTED: RING-H2 finger protein ATL2-like [Cucumis sativus]
Csa1G426980	846	15.81	36.51	1.20745430107651	1.64577e-13	1.06859769246164e-12	Up	NA	GO:0003677//DNA binding;GO:0001071//nucleic acid binding transcription factor activity	GO:0010467//gene expression	K13425//WRKY transcription factor 22	gi|700210401|gb|KGN65497.1|//hypothetical protein Csa_1G426980 [Cucumis sativus]
Csa3G146340	1941	8.19	18.91	1.20721400630875	1.409362e-16	1.07376284508806e-15	Up	GO:0031224//intrinsic component of membrane	GO:0015291//secondary active transmembrane transporter activity	GO:0015698//inorganic anion transport	K17471//sulfate transporter 3	gi|778678394|ref|XP_004134124.2|//PREDICTED: sulfate transporter 3.1 [Cucumis sativus]
Csa1G570220	1193	12.00	27.64	1.20372320989238	1.668246e-29	2.08702292005141e-28	Up	NA	GO:0016876//ligase activity, forming aminoacyl-tRNA and related compounds;GO:0032559//adenyl ribonucleotide binding	GO:0010467//gene expression	K14820//ribosome biogenesis protein BRX1	gi|778662534|ref|XP_011659901.1|//PREDICTED: LOW QUALITY PROTEIN: ribosome biogenesis protein BRX1-like [Cucumis sativus]
Csa2G033930	524	19.46	44.82	1.20363093872928	2.31334e-10	1.21772516062737e-09	Up	NA	NA	GO:0050896//response to stimulus	NA	gi|449454030|ref|XP_004144759.1|//PREDICTED: universal stress protein A-like protein isoform X2 [Cucumis sativus];gi|449454028|ref|XP_004144758.1|//PREDICTED: universal stress protein A-like protein isoform X1 [Cucumis sativus]
Csa5G586000	1268	26.00	59.85	1.20283962391505	1.959544e-31	2.58256489532837e-30	Up	GO:0005840//ribosome	GO:0003735//structural constituent of ribosome	GO:0006412//translation	K02925//large subunit ribosomal protein L3e	gi|449435140|ref|XP_004135353.1|//PREDICTED: 60S ribosomal protein L3-2 [Cucumis sativus]
Csa1G264580	1539	4.17	9.59	1.20148343157347	2.10306e-07	8.61674720269417e-07	Up	NA	NA	GO:0006810//transport	K13783//MFS transporter, OPA family, solute carrier family 37 (glycerol-3-phosphate transporter), member 1/2	gi|449458003|ref|XP_004146737.1|//PREDICTED: putative glycerol-3-phosphate transporter 5 [Cucumis sativus]
Csa6G524050	1377	13.40	30.81	1.20116568169422	1.71618e-18	1.41796094567063e-17	Up	NA	NA	NA	K10950//ERO1-like protein alpha [EC:1.8.4.-]	gi|778721442|ref|XP_011658299.1|//PREDICTED: endoplasmic reticulum oxidoreductin-1-like [Cucumis sativus]
Csa3G183950	2112	9.19	21.13	1.20115600064591	9.00312e-20	7.94806049523809e-19	Up	GO:0044424//intracellular part	GO:0005515//protein binding;GO:0032559//adenyl ribonucleotide binding	GO:0044267//cellular protein metabolic process;GO:0050896//response to stimulus	K04079//molecular chaperone HtpG	gi|449445987|ref|XP_004140753.1|//PREDICTED: heat shock protein 83 [Cucumis sativus]
Csa6G289740	801	20.12	46.26	1.20113496083066	1.022044e-15	7.45693722038981e-15	Up	NA	NA	NA	K16222//Dof zinc finger protein DOF5.5	gi|449463677|ref|XP_004149558.1|//PREDICTED: dof zinc finger protein DOF5.3-like [Cucumis sativus]
Csa3G153740	792	17.72	40.72	1.20035895752068	1.056522e-09	5.31702617683557e-09	Up	GO:0043231//intracellular membrane-bounded organelle;GO:0005634//nucleus	GO:0003723//RNA binding;GO:0003676//nucleic acid binding	GO:0042254//ribosome biogenesis;GO:0042255//ribosome assembly	K07565//60S ribosome subunit biogenesis protein NIP7	gi|449432838|ref|XP_004134205.1|//PREDICTED: 60S ribosome subunit biogenesis protein NIP7 homolog [Cucumis sativus]
Csa7G290540	1845	6.63	15.22	1.19888758339096	2.71198e-12	1.62936428024691e-11	Up	GO:0016021//integral component of membrane	GO:0015238//drug transmembrane transporter activity;GO:0015297//antiporter activity	GO:0006855//drug transmembrane transport	K03327//multidrug resistance protein, MATE family	gi|778726413|ref|XP_011659097.1|//PREDICTED: MATE efflux family protein 5 [Cucumis sativus]
Csa1G042290	2106	20.55	47.17	1.19873120696055	1.565728e-51	3.29853476709957e-50	Up	GO:0005634//nucleus	GO:0003677//DNA binding;GO:0003700//transcription factor activity, sequence-specific DNA binding	GO:0006355//regulation of transcription, DNA-templated	K13434//pathogenesis-related genes transcriptional activator PTI6	gi|449439397|ref|XP_004137472.1|//PREDICTED: ethylene-responsive transcription factor CRF3-like [Cucumis sativus]
Csa1G420320	1128	306.31	702.20	1.19688952933106	0	0	Up	NA	NA	NA	K12135//zinc finger protein CONSTANS;K12129//pseudo-response regulator 7	gi|778660656|ref|XP_011656660.1|//PREDICTED: zinc finger protein CONSTANS-LIKE 5-like isoform X2 [Cucumis sativus]
Csa4G022920	1542	10.87	24.89	1.19521428995373	7.43302e-17	5.72127984657968e-16	Up	GO:0031224//intrinsic component of membrane	GO:0015291//secondary active transmembrane transporter activity;GO:0016628//oxidoreductase activity, acting on the CH-CH group of donors, NAD or NADP as acceptor	GO:0071702//organic substance transport;GO:0008152//metabolic process	K08150//MFS transporter, SP family, solute carrier family 2 (myo-inositol transporter), member 13	gi|449458415|ref|XP_004146943.1|//PREDICTED: hexose carrier protein HEX6-like [Cucumis sativus]
Csa7G066300	1083	11.58	26.51	1.19490141687802	1.010904e-12	6.25898767938931e-12	Up	NA	NA	NA	K19041//E3 ubiquitin-protein ligase RNF38/44 [EC:2.3.2.27];K10664//E3 ubiquitin-protein ligase ATL6/9/15/31/42/55 [EC:2.3.2.27]	gi|449438582|ref|XP_004137067.1|//PREDICTED: RING-H2 finger protein ATL54 [Cucumis sativus]
Csa3G733880	2421	1.66	3.80	1.19481617698402	3.89392e-05	0.000124936618955002	Up	NA	NA	NA	K04733//interleukin-1 receptor-associated kinase 4 [EC:2.7.11.1]	gi|449440309|ref|XP_004137927.1|//PREDICTED: putative receptor protein kinase ZmPK1 [Cucumis sativus]
Csa2G008690	1671	17.58	40.21	1.19361926565696	2.10102e-28	2.55296225468165e-27	Up	NA	NA	NA	NA	gi|449443021|ref|XP_004139279.1|//PREDICTED: NEDD8 ultimate buster 1 [Cucumis sativus]
Csa4G639190	2466	13.61	31.08	1.19131943690372	2.9052e-16	2.17761352329611e-15	Up	NA	NA	NA	K15891//farnesol dehydrogenase [EC:1.1.1.216]	gi|449446981|ref|XP_004141248.1|//PREDICTED: uncharacterized protein LOC101212227 [Cucumis sativus]
Csa2G116250	4322	10.91	24.89	1.18991512865743	4.5973e-44	8.37147257249766e-43	Up	GO:0016021//integral component of membrane	GO:0000287//magnesium ion binding;GO:0005524//ATP binding;GO:0004012//phospholipid-translocating ATPase activity	GO:0045332//phospholipid translocation	K01530//phospholipid-translocating ATPase [EC:3.6.3.1]	gi|700206282|gb|KGN61401.1|//hypothetical protein Csa_2G116250 [Cucumis sativus]
Csa7G056470	1631	78.88	179.94	1.18978447121198	2.97128e-108	1.39370931277108e-106	Up	GO:0016020//membrane;GO:0031981//nuclear lumen;GO:0043232//intracellular non-membrane-bounded organelle;GO:0030312//external encapsulating structure	GO:0005524//ATP binding;GO:0032559//adenyl ribonucleotide binding;GO:0005198//structural molecule activity;GO:0004386//helicase activity	GO:0009913//epidermal cell differentiation;GO:0009314//response to radiation;GO:0006950//response to stress;GO:0009725//response to hormone;GO:0048588//developmental cell growth	K10355//actin, other eukaryote	gi|449438155|ref|XP_004136855.1|//PREDICTED: actin-like [Cucumis sativus]
Csa3G354480	1388	1.82	4.15	1.18917288603559	3.86766e-05	0.000124155457717678	Up	NA	NA	NA	NA	gi|700202721|gb|KGN57854.1|//hypothetical protein Csa_3G354480 [Cucumis sativus]
Csa1G002950	1943	2.41	5.49	1.18777300277524	1.189212e-05	4.04635567068694e-05	Up	NA	NA	NA	K02923//large subunit ribosomal protein L38e;K04422//mitogen-activated protein kinase kinase kinase 13 [EC:2.7.11.25];K03255//protein TIF31	gi|449440620|ref|XP_004138082.1|//PREDICTED: uncharacterized protein LOC101222072 [Cucumis sativus];gi|700208430|gb|KGN63526.1|//hypothetical protein Csa_1G002950 [Cucumis sativus]
Csa1G064800	2256	4.49	10.22	1.18660784619647	1.08481e-11	6.28292515917882e-11	Up	NA	NA	NA	K04733//interleukin-1 receptor-associated kinase 4 [EC:2.7.11.1];K04730//interleukin-1 receptor-associated kinase 1 [EC:2.7.11.1]	gi|700209462|gb|KGN64558.1|//hypothetical protein Csa_1G064800 [Cucumis sativus];gi|778658511|ref|XP_011652851.1|//PREDICTED: putative receptor-like protein kinase At4g00960 [Cucumis sativus]
BGI_novel_G000035	2165	3.08	7.01	1.18648409331572	1.509488e-07	6.28125126293288e-07	Up	NA	NA	NA	K13024//inositol-hexakisphosphate/diphosphoinositol-pentakisphosphate 1-kinase [EC:2.7.4.24];K01537//Ca2+-transporting ATPase [EC:3.6.3.8];K13116//ATP-dependent RNA helicase DDX41 [EC:3.6.4.13];K01507//inorganic pyrophosphatase [EC:3.6.1.1];K00574//cyclopropane-fatty-acyl-phospholipid synthase [EC:2.1.1.79]	gi|659111573|ref|XP_008455798.1|//PREDICTED: uncharacterized protein LOC103495894 [Cucumis melo]
Csa7G058530	2652	32.04	72.92	1.18644041363042	5.05142e-80	1.68087079863248e-78	Up	GO:0016020//membrane	GO:0005509//calcium ion binding;GO:0004609//phosphatidylserine decarboxylase activity	GO:0006646//phosphatidylethanolamine biosynthetic process;GO:0016540//protein autoprocessing	K01613//phosphatidylserine decarboxylase [EC:4.1.1.65]	gi|778724254|ref|XP_011658767.1|//PREDICTED: phosphatidylserine decarboxylase proenzyme 2 [Cucumis sativus];gi|700188445|gb|KGN43678.1|//hypothetical protein Csa_7G058530 [Cucumis sativus]
Csa7G127380	2193	18.23	41.48	1.18610133277409	6.2528e-38	9.76078627105052e-37	Up	GO:0031224//intrinsic component of membrane	GO:0016759//cellulose synthase activity	GO:0045229//external encapsulating structure organization;GO:0009250//glucan biosynthetic process	K10999//cellulose synthase A [EC:2.4.1.12]	gi|449462403|ref|XP_004148930.1|//PREDICTED: cellulose synthase-like protein E1 [Cucumis sativus]
Csa7G066840	2239	4.20	9.55	1.18511140525699	5.1034e-09	2.4271386366968e-08	Up	NA	NA	NA	K04733//interleukin-1 receptor-associated kinase 4 [EC:2.7.11.1];K04730//interleukin-1 receptor-associated kinase 1 [EC:2.7.11.1]	gi|700188545|gb|KGN43778.1|//hypothetical protein Csa_7G066840 [Cucumis sativus]
Csa3G878180	1821	1.95	4.43	1.18383257480541	0.0001527678	0.000451119234648058	Up	NA	GO:0000166//nucleotide binding;GO:0004672//protein kinase activity	NA	K14962//COMPASS component SWD2;K00276//primary-amine oxidase [EC:1.4.3.21]	gi|700204965|gb|KGN60098.1|//hypothetical protein Csa_3G878180 [Cucumis sativus]
Csa2G020870	3634	3.15	7.15	1.18259141327847	3.43632e-13	2.18957136235679e-12	Up	NA	GO:0000166//nucleotide binding	NA	K06758;K03283//heat shock 70kDa protein 1/8;K19613//leucine-rich repeat protein SHOC2	gi|700205745|gb|KGN60864.1|//hypothetical protein Csa_2G020870 [Cucumis sativus]
Csa5G647380	2149	5.68	12.89	1.18228942885697	3.06308e-13	1.95623081627297e-12	Up	NA	NA	NA	K14793//ribosomal RNA-processing protein 9	gi|778707751|ref|XP_011656049.1|//PREDICTED: U3 small nucleolar RNA-interacting protein 2 [Cucumis sativus]
Csa7G373530	2421	14.48	32.86	1.18227087786687	1.45474e-32	1.99562852995067e-31	Up	GO:0016020//membrane;GO:0016021//integral component of membrane	GO:0005524//ATP binding;GO:0016301//kinase activity;GO:0004672//protein kinase activity	GO:0006468//protein phosphorylation	K04730//interleukin-1 receptor-associated kinase 1 [EC:2.7.11.1];K13415//protein brassinosteroid insensitive 1 [EC:2.7.10.1 2.7.11.1]	gi|449462467|ref|XP_004148962.1|//PREDICTED: probably inactive leucine-rich repeat receptor-like protein kinase At5g48380 [Cucumis sativus]
CsaUNG031630	672	14.11	32.02	1.18225531991899	2.36958e-09	1.16040866113208e-08	Up	NA	NA	NA	K07198//5'-AMP-activated protein kinase, catalytic alpha subunit [EC:2.7.11.11]	gi|449439771|ref|XP_004137659.1|//PREDICTED: CBL-interacting serine/threonine-protein kinase 25-like [Cucumis sativus]
Csa4G295480	1332	92.77	210.47	1.18188436231409	6.05112e-110	2.90125866798029e-108	Up	NA	NA	NA	K19044//E3 ubiquitin-protein ligase XBAT32/33 [EC:2.3.2.27]	gi|449448637|ref|XP_004142072.1|//PREDICTED: putative E3 ubiquitin-protein ligase XBAT31 [Cucumis sativus]
Csa1G056920	1767	26.94	61.07	1.18071399438095	5.46838e-44	9.92980271268657e-43	Up	GO:0031224//intrinsic component of membrane	GO:0005275//amine transmembrane transporter activity	GO:0015837//amine transport	K03294//basic amino acid/polyamine antiporter, APA family	gi|778658250|ref|XP_004145133.2|//PREDICTED: cationic amino acid transporter 5 [Cucumis sativus]
Csa6G290790	603	9.58	21.67	1.17760159235749	4.3138e-06	1.53795660805861e-05	Up	NA	NA	NA	K13944;K01227//mannosyl-glycoprotein endo-beta-N-acetylglucosaminidase [EC:3.2.1.96]	gi|449463671|ref|XP_004149555.1|//PREDICTED: LOB domain-containing protein 1-like [Cucumis sativus]
Csa3G142980	515	17.45	39.41	1.17533471304082	5.8291e-08	2.52940839500669e-07	Up	NA	GO:0004867//serine-type endopeptidase inhibitor activity;GO:0008233//peptidase activity	GO:0009611//response to wounding;GO:0010951//negative regulation of endopeptidase activity	K18151//ureidoglycolate amidohydrolase [EC:3.5.1.116]	gi|449432610|ref|XP_004134092.1|//PREDICTED: ureidoglycolate hydrolase [Cucumis sativus];gi|449432606|ref|XP_004134090.1|//PREDICTED: glu S.griseus protease inhibitor-like [Cucumis sativus]
Csa1G163160	846	7.01	15.83	1.17517490612656	7.32756e-05	0.000226122832847178	Up	NA	GO:0009055//electron carrier activity;GO:0043169//cation binding;GO:0051537//2 iron, 2 sulfur cluster binding;GO:0046872//metal ion binding;GO:0051536//iron-sulfur cluster binding	GO:0022900//electron transport chain;GO:0006091//generation of precursor metabolites and energy	K02639//ferredoxin	gi|700209835|gb|KGN64931.1|//hypothetical protein Csa_1G163160 [Cucumis sativus]
Csa7G343340	1299	9.56	21.58	1.17461234150727	2.72386e-12	1.63599687627276e-11	Up	NA	NA	NA	K14329//agmatine coumaroyltransferase [EC:2.3.1.64 2.3.1.-];K13264//isoflavone 7-O-glucoside-6''-O-malonyltransferase [EC:2.3.1.115]	gi|778726993|ref|XP_004139706.2|//PREDICTED: malonyl-CoA:anthocyanidin 5-O-glucoside-6''-O-malonyltransferase-like [Cucumis sativus]
Csa5G155590	1041	24.99	56.38	1.17383257648372	9.92422e-24	1.04480728242293e-22	Up	GO:0031224//intrinsic component of membrane	NA	GO:0006810//transport	K15277//solute carrier family 35 (adenosine 3'-phospho 5'-phosphosulfate transporter), member B3	gi|700194971|gb|KGN50148.1|//hypothetical protein Csa_5G155590 [Cucumis sativus]
Csa3G734200	1447	2.27	5.12	1.17345151270909	0.000213394	0.000616035533738692	Up	NA	NA	NA	K07059//uncharacterized protein;K09651//rhomboid domain-containing protein 1 [EC:3.4.21.-];K01240//uridine nucleosidase [EC:3.2.2.3]	gi|700203734|gb|KGN58867.1|//hypothetical protein Csa_3G734200 [Cucumis sativus]
Csa7G387710	1919	3.69	8.32	1.1729627120807	0.000189195	0.000550750690892777	Up	NA	GO:0051213//dioxygenase activity	GO:0019748//secondary metabolic process	K06890//uncharacterized protein	gi|778727609|ref|XP_011659286.1|//PREDICTED: uncharacterized protein LOC101222496 isoform X1 [Cucumis sativus]
Csa3G778360	705	11.19	25.21	1.17178608188215	6.55698e-08	2.8276068382809e-07	Up	NA	NA	NA	NA	gi|778684415|ref|XP_004136703.2|//PREDICTED: transcription repressor OFP15-like [Cucumis sativus]
Csa1G015740	2742	25.48	57.37	1.17093124039567	1.827068e-56	4.20398412387707e-55	Up	GO:0016021//integral component of membrane	GO:0003824//catalytic activity;GO:0016405//CoA-ligase activity	GO:0008152//metabolic process	K15164//mediator of RNA polymerase II transcription subunit 13;K01895//acetyl-CoA synthetase [EC:6.2.1.1]	gi|778656236|ref|XP_011648674.1|//PREDICTED: probable acyl-activating enzyme 17, peroxisomal [Cucumis sativus]
Csa2G237740	339	53.12	119.59	1.17076970601968	2.67766e-14	1.80670119792028e-13	Up	NA	NA	NA	NA	gi|700206637|gb|KGN61756.1|//hypothetical protein Csa_2G237740 [Cucumis sativus]
Csa6G495830	1803	1.84	4.14	1.16992500144231	0.000303494	0.000855584967994207	Up	NA	NA	NA	K03978//GTP-binding protein	gi|700193425|gb|KGN48629.1|//hypothetical protein Csa_6G495830 [Cucumis sativus]
Csa4G110050	918	74.65	167.96	1.16990352781311	1.05567e-58	2.52763495940959e-57	Up	NA	NA	NA	K14299//nucleoporin SEH1	gi|449438771|ref|XP_004137161.1|//PREDICTED: protein EXORDIUM-like 2 [Cucumis sativus]
Csa5G218780	1305	22.36	50.27	1.16877750085218	1.467846e-26	1.68672315442739e-25	Up	GO:0031224//intrinsic component of membrane	NA	NA	K14993//solute carrier family 38 (sodium-coupled neutral amino acid transporter), member 6;K14207//solute carrier family 38 (sodium-coupled neutral amino acid transporter), member 2	gi|449457431|ref|XP_004146452.1|//PREDICTED: probable sodium-coupled neutral amino acid transporter 6 [Cucumis sativus]
Csa1G025940	1740	21.94	49.32	1.16860927399965	9.4419e-35	1.37366237219731e-33	Up	GO:0031224//intrinsic component of membrane	GO:0022857//transmembrane transporter activity	GO:0006810//transport	K08150//MFS transporter, SP family, solute carrier family 2 (myo-inositol transporter), member 13	gi|778656600|ref|XP_011649369.1|//PREDICTED: probable inositol transporter 2 [Cucumis sativus]
Csa6G135470	1626	43.14	96.93	1.16791707482607	3.78066e-62	9.64539024377457e-61	Up	NA	NA	NA	K17761//succinate-semialdehyde dehydrogenase, mitochondrial [EC:1.2.1.24]	gi|449444298|ref|XP_004139912.1|//PREDICTED: succinate-semialdehyde dehydrogenase, mitochondrial [Cucumis sativus]
Csa1G066530	1847	118.93	266.93	1.16634877797555	5.9235e-191	5.14762727678571e-189	Up	NA	NA	NA	NA	gi|449473345|ref|XP_004153855.1|//PREDICTED: uncharacterized protein LOC101208164 [Cucumis sativus]
Csa2G005330	1807	2.87	6.43	1.16376800065226	0.0001854736	0.000540888254322097	Up	NA	NA	NA	NA	gi|778665966|ref|XP_011648664.1|//PREDICTED: uncharacterized protein LOC101206989 isoform X1 [Cucumis sativus];gi|449443137|ref|XP_004139337.1|//PREDICTED: uncharacterized protein LOC101206989 isoform X2 [Cucumis sativus]
Csa3G710780	820	94.98	212.75	1.16346347060235	1.468634e-57	3.45270887004831e-56	Up	NA	NA	NA	K09517//DnaJ homolog subfamily B member 11;K03686//molecular chaperone DnaJ	gi|778682937|ref|XP_011651813.1|//PREDICTED: chaperone protein dnaJ 8, chloroplastic-like [Cucumis sativus]
Csa2G000160	3076	31.20	69.82	1.16209432780314	1.01502e-69	2.94023501785714e-68	Up	NA	NA	NA	K20161//DENN domain-containing protein 2	gi|778665533|ref|XP_004141070.2|//PREDICTED: uncharacterized protein LOC101208952 [Cucumis sativus]
Csa3G035840	444	214.76	480.57	1.16202127977562	4.17892e-72	1.25729299412674e-70	Up	NA	NA	NA	K14998//surfeit locus 1 family protein	gi|449460411|ref|XP_004147939.1|//PREDICTED: lipid transfer-like protein VAS [Cucumis sativus]
Csa3G209460	903	4.21	9.42	1.16190682654639	0.00018045	0.000526948649864987	Up	NA	NA	NA	NA	gi|659112197|ref|XP_008456109.1|//PREDICTED: proline-rich receptor-like protein kinase PERK10 [Cucumis melo]
Csa5G610520	1989	32.75	73.27	1.16172770902726	1.044328e-51	2.21931100960699e-50	Up	GO:0005622//intracellular	GO:0008270//zinc ion binding	NA	K12135//zinc finger protein CONSTANS	gi|778706088|ref|XP_011655796.1|//PREDICTED: zinc finger protein CONSTANS-LIKE 9 [Cucumis sativus]
Csa6G517220	771	23.13	51.73	1.16123592556756	6.23608e-16	4.59294488384412e-15	Up	NA	NA	NA	K01953//asparagine synthase (glutamine-hydrolysing) [EC:6.3.5.4]	gi|449433863|ref|XP_004134716.1|//PREDICTED: stem-specific protein TSJT1 [Cucumis sativus]
Csa1G164660	1266	21.32	47.68	1.16117679770299	2.67742e-24	2.86366251208791e-23	Up	NA	GO:0043167//ion binding;GO:0016798//hydrolase activity, acting on glycosyl bonds	GO:0044238//primary metabolic process	K10761//tRNA(His) guanylyltransferase [EC:2.7.7.79];K15429//tRNA (guanine37-N1)-methyltransferase [EC:2.1.1.228];K19619//tyrosyl-DNA phosphodiesterase 2 [EC:3.1.4.-]	gi|700209836|gb|KGN64932.1|//hypothetical protein Csa_1G164660 [Cucumis sativus]
Csa6G094720	1623	35.26	78.82	1.16052927481765	2.93064e-50	6.02405894825765e-49	Up	NA	GO:0016832//aldehyde-lyase activity;GO:0048037//cofactor binding	GO:0043436//oxoacid metabolic process	K01634//sphinganine-1-phosphate aldolase [EC:4.1.2.27]	gi|449445558|ref|XP_004140539.1|//PREDICTED: sphingosine-1-phosphate lyase [Cucumis sativus]
Csa2G047820	702	7.55	16.83	1.15648662711751	1.396092e-05	4.70911919459366e-05	Up	NA	NA	NA	K19041//E3 ubiquitin-protein ligase RNF38/44 [EC:2.3.2.27]	gi|700205970|gb|KGN61089.1|//hypothetical protein Csa_2G047820 [Cucumis sativus]
Csa3G842710	1350	350.94	782.24	1.15638691554632	0	0	Up	GO:0030312//external encapsulating structure;GO:0015630//microtubule cytoskeleton;GO:0043234//protein complex;GO:0044444//cytoplasmic part	GO:0032561//guanyl ribonucleotide binding;GO:0017111//nucleoside-triphosphatase activity	GO:0007017//microtubule-based process;GO:0010038//response to metal ion;GO:0009207//purine ribonucleoside triphosphate catabolic process;GO:0043623//cellular protein complex assembly	K07374//tubulin alpha	gi|659130026|ref|XP_008464962.1|//PREDICTED: tubulin alpha-3 chain-like [Cucumis melo]
Csa1G064750	723	8.92	19.87	1.15547625732937	1.560392e-06	5.84126743692308e-06	Up	NA	NA	NA	NA	gi|700209457|gb|KGN64553.1|//hypothetical protein Csa_1G064750 [Cucumis sativus]
Csa3G851770	1533	70.31	156.54	1.15472955039511	1.077598e-91	4.22913763467742e-90	Up	NA	NA	NA	K12486//stromal membrane-associated protein	gi|449464762|ref|XP_004150098.1|//PREDICTED: probable ADP-ribosylation factor GTPase-activating protein AGD5 [Cucumis sativus]
Csa3G777680	1044	4.33	9.63	1.15316877311673	4.58476e-05	0.00014556669084978	Up	NA	NA	NA	NA	gi|449462992|ref|XP_004149218.1|//PREDICTED: probable F-box protein At1g60180 [Cucumis sativus]
Csa1G002770	1695	32.76	72.80	1.15200309344505	4.37686e-48	8.65853219105691e-47	Up	NA	GO:0051540//metal cluster binding;GO:0004468//lysine N-acetyltransferase activity, acting on acetyl phosphate as donor	NA	K07739//elongator complex protein 3 [EC:2.3.1.48]	gi|449440592|ref|XP_004138068.1|//PREDICTED: elongator complex protein 3 [Cucumis sativus]
Csa6G093640	879	50.41	111.99	1.15158805501486	4.28672e-37	6.58085895268139e-36	Up	NA	NA	NA	K13035//beta-cyano-L-alanine hydratase/nitrilase [EC:3.5.5.4 4.2.1.65];K16221//transcription factor TCP21 (protein CCA1 HIKING EXPEDITION)	gi|778711824|ref|XP_011656799.1|//PREDICTED: transcription factor TCP20-like [Cucumis sativus]
Csa3G646000	2809	2.22	4.93	1.15102797002781	2.08002e-07	8.52773153327717e-07	Up	GO:0016020//membrane;GO:0044464//cell part	NA	NA	K08517//vesicle transport protein SEC22	gi|700203329|gb|KGN58462.1|//hypothetical protein Csa_3G646000 [Cucumis sativus]
Csa3G740800	1347	3.35	7.43	1.14920111519346	4.58476e-05	0.000145542951989563	Up	NA	NA	NA	K09422//myb proto-oncogene protein, plant	gi|449440407|ref|XP_004137976.1|//PREDICTED: transcription factor RAX2 [Cucumis sativus];gi|700203855|gb|KGN58988.1|//hypothetical protein Csa_3G740800 [Cucumis sativus]
Csa2G070840	1791	12.94	28.68	1.1482074067094	6.62236e-21	6.17685001245807e-20	Up	NA	NA	NA	K16280//E3 ubiquitin-protein ligase RGLG [EC:2.3.2.27]	gi|449470289|ref|XP_004152850.1|//PREDICTED: protein BONZAI 3 [Cucumis sativus]
Csa5G622580	1239	10.45	23.09	1.14376523080587	5.15568e-12	3.04399353594176e-11	Up	NA	GO:0031406//carboxylic acid binding	NA	NA	gi|449449320|ref|XP_004142413.1|//PREDICTED: ACT domain-containing protein ACR10-like [Cucumis sativus]
Csa3G337350	468	63.93	140.75	1.13856992335109	6.35834e-23	6.46663774503657e-22	Up	NA	NA	NA	NA	gi|449464140|ref|XP_004149787.1|//PREDICTED: kirola-like [Cucumis sativus]
Csa2G100580	1333	27.26	59.92	1.13625206165354	1.828404e-24	1.96639294276243e-23	Up	GO:0016021//integral component of membrane	GO:0008270//zinc ion binding	NA	K10661//E3 ubiquitin-protein ligase MARCH6 [EC:2.3.2.27]	gi|449442293|ref|XP_004138916.1|//PREDICTED: uncharacterized protein LOC101203306 [Cucumis sativus]
Csa5G606770	1342	33.47	73.55	1.13585679045566	1.06984e-39	1.7633789534293e-38	Up	GO:0005829//cytosol	GO:0017057//6-phosphogluconolactonase activity	GO:0006098//pentose-phosphate shunt;GO:0006007//glucose catabolic process;GO:0005975//carbohydrate metabolic process	K01057//6-phosphogluconolactonase [EC:3.1.1.31]	gi|449434716|ref|XP_004135142.1|//PREDICTED: probable 6-phosphogluconolactonase 1 [Cucumis sativus]
Csa3G710790	471	76.85	168.84	1.13553956937956	2.55664e-27	3.00166189626056e-26	Up	NA	GO:0005515//protein binding	NA	K03686//molecular chaperone DnaJ	gi|778682940|ref|XP_004137653.2|//PREDICTED: chaperone protein dnaJ 8, chloroplastic-like [Cucumis sativus]
Csa3G122360	2634	56.94	124.92	1.13349007627831	5.08736e-111	2.475763744e-109	Up	NA	NA	NA	K15216//RNA polymerase I-specific transcription initiation factor RRN3	gi|449432152|ref|XP_004133864.1|//PREDICTED: RNA polymerase I-specific transcription initiation factor RRN3 [Cucumis sativus]
Csa1G611820	1721	12.15	26.63	1.13209611471747	9.08064e-20	8.01286211423391e-19	Up	NA	NA	NA	K01188//beta-glucosidase [EC:3.2.1.21]	gi|778663590|ref|XP_011660116.1|//PREDICTED: cyanogenic beta-glucosidase-like [Cucumis sativus];gi|700211360|gb|KGN66456.1|//hypothetical protein Csa_1G611820 [Cucumis sativus]
Csa5G167110	483	75.08	164.44	1.13106072173306	3.43834e-27	4.01263347961631e-26	Up	GO:0043231//intracellular membrane-bounded organelle	GO:0001071//nucleic acid binding transcription factor activity;GO:0003676//nucleic acid binding	GO:0006351//transcription, DNA-templated	K09286//EREBP-like factor	gi|449451860|ref|XP_004143678.1|//PREDICTED: ethylene-responsive transcription factor ERF106 [Cucumis sativus]
Csa1G470310	1195	25.91	56.73	1.13060284849082	1.182024e-18	9.84986266438356e-18	Up	GO:0031981//nuclear lumen;GO:0005840//ribosome;GO:0015934//large ribosomal subunit;GO:0009536//plastid	GO:0005198//structural molecule activity;GO:0003735//structural constituent of ribosome	GO:0010467//gene expression;GO:0006412//translation	K02868//large subunit ribosomal protein L11e	gi|659068234|ref|XP_008443441.1|//PREDICTED: 60S ribosomal protein L11-1 [Cucumis melo]
BGI_novel_G000146	2280	4.61	10.09	1.13008751867702	5.19236e-10	2.67180755379329e-09	Up	NA	NA	NA	K15032//mTERF domain-containing protein, mitochondrial	gi|778678818|ref|XP_011651040.1|//PREDICTED: uncharacterized protein LOC101221269 isoform X2 [Cucumis sativus]
Csa5G630930	1017	43.06	94.19	1.12922557986343	1.924416e-35	2.83793044363636e-34	Up	NA	NA	NA	K02940//large subunit ribosomal protein L9e;K01623//fructose-bisphosphate aldolase, class I [EC:4.1.2.13]	gi|700197214|gb|KGN52391.1|//hypothetical protein Csa_5G630930 [Cucumis sativus]
Csa2G351610	1510	29.06	63.55	1.12885742225948	2.08726e-39	3.38870751959967e-38	Up	GO:0031224//intrinsic component of membrane;GO:0016021//integral component of membrane;GO:0005739//mitochondrion;GO:0019866//organelle inner membrane	GO:0015228//coenzyme A transmembrane transporter activity;GO:0003735//structural constituent of ribosome	GO:0006810//transport;GO:0035349//coenzyme A transmembrane transport;GO:0006412//translation	K15084//solute carrier family 25 (mitochondrial carrier protein), member 16	gi|449450363|ref|XP_004142932.1|//PREDICTED: graves disease carrier protein [Cucumis sativus]
Csa4G420210	1266	10.02	21.88	1.12673022959735	1.880822e-11	1.0717822322014e-10	Up	NA	NA	NA	K02940//large subunit ribosomal protein L9e;K01623//fructose-bisphosphate aldolase, class I [EC:4.1.2.13]	gi|700199522|gb|KGN54680.1|//hypothetical protein Csa_4G420210 [Cucumis sativus]
Csa3G781040	1022	20.93	45.69	1.12630613095274	1.550126e-06	5.80506977991535e-06	Up	NA	GO:0016787//hydrolase activity	NA	K08311//putative (di)nucleoside polyphosphate hydrolase [EC:3.6.1.-]	gi|700204070|gb|KGN59203.1|//hypothetical protein Csa_3G781040 [Cucumis sativus];gi|659085774|ref|XP_008443595.1|//PREDICTED: nudix hydrolase 26, chloroplastic-like, partial [Cucumis melo];gi|778684462|ref|XP_011652033.1|//PREDICTED: nudix hydrolase 26, chloroplastic-like [Cucumis sativus]
BGI_novel_G000143	1308	4.20	9.16	1.12495827043082	1.157858e-05	3.94726161611208e-05	Up	GO:0016021//integral component of membrane	NA	NA	K06119//sulfoquinovosyltransferase [EC:2.4.1.-]	gi|449432737|ref|XP_004134155.1|//PREDICTED: transmembrane protein 64-like [Cucumis sativus]
Csa2G360650	2115	19.84	43.23	1.12362081050903	5.09394e-35	7.4555365443609e-34	Up	NA	NA	NA	K04421//mitogen-activated protein kinase kinase kinase 3 [EC:2.7.11.25];K11229//mitogen-activated protein kinase kinase kinase [EC:2.7.11.1]	gi|778671190|ref|XP_004152792.2|//PREDICTED: mitogen-activated protein kinase kinase kinase YODA-like isoform X2 [Cucumis sativus]
Csa1G042920	1023	19.68	42.80	1.12088057594927	6.88362e-17	5.30889647068146e-16	Up	NA	NA	NA	K13464//jasmonate ZIM domain-containing protein	gi|449439473|ref|XP_004137510.1|//PREDICTED: protein TIFY 6B isoform X1 [Cucumis sativus]
Csa3G895090	1077	6.64	14.44	1.12081559554025	6.56568e-07	2.55257692989814e-06	Up	NA	NA	NA	K14484//auxin-responsive protein IAA	gi|449436896|ref|XP_004136228.1|//PREDICTED: auxin-responsive protein IAA26-like [Cucumis sativus]
Csa3G128960	1281	8.93	19.38	1.11783649029386	2.6103e-10	1.36628394191987e-09	Up	NA	GO:0032559//adenyl ribonucleotide binding;GO:0004672//protein kinase activity	GO:0006464//cellular protein modification process	K04733//interleukin-1 receptor-associated kinase 4 [EC:2.7.11.1];K00924;K04730//interleukin-1 receptor-associated kinase 1 [EC:2.7.11.1]	gi|449432360|ref|XP_004133967.1|//PREDICTED: probable receptor-like protein kinase At5g47070 [Cucumis sativus]
Csa1G042980	963	62.15	134.75	1.11645897658738	2.30312e-46	4.38674500195695e-45	Up	NA	NA	NA	K04463//mitogen-activated protein kinase kinase 5 [EC:2.7.12.2];K04368//mitogen-activated protein kinase kinase 1 [EC:2.7.12.2];K13413//mitogen-activated protein kinase kinase 4/5, plant [EC:2.7.12.2]	gi|449439485|ref|XP_004137516.1|//PREDICTED: mitogen-activated protein kinase kinase 9 [Cucumis sativus]
Csa5G610450	2127	39.11	84.76	1.11584605163922	1.176424e-66	3.20732067002801e-65	Up	NA	NA	NA	K04422//mitogen-activated protein kinase kinase kinase 13 [EC:2.7.11.25];K03255//protein TIF31	gi|449434590|ref|XP_004135079.1|//PREDICTED: RNA polymerase II degradation factor 1 [Cucumis sativus]
Csa1G008500	3086	13.37	28.96	1.11506213698985	1.174576e-32	1.61813845831564e-31	Up	NA	NA	NA	K17964//leucine-rich PPR motif-containing protein, mitochondrial;K15710//E3 ubiquitin-protein ligase SHPRH [EC:3.6.4.- 2.3.2.27];K17710//pentatricopeptide repeat domain-containing protein 1	gi|449440748|ref|XP_004138146.1|//PREDICTED: pentatricopeptide repeat-containing protein At1g18900 [Cucumis sativus]
Csa3G889860	1002	21.47	46.50	1.11490852502398	4.87602e-21	4.56769034263715e-20	Up	NA	NA	NA	K14800//pre-rRNA-processing protein TSR2	gi|449436990|ref|XP_004136275.1|//PREDICTED: pre-rRNA-processing protein TSR2 homolog [Cucumis sativus]
Csa4G646220	1921	5.98	12.95	1.11473470837581	3.61174e-09	1.74154398910082e-08	Up	NA	NA	NA	K00599//methyltransferase-like protein 6 [EC:2.1.1.-]	gi|449447139|ref|XP_004141326.1|//PREDICTED: uncharacterized protein LOC101211005 [Cucumis sativus];gi|700200190|gb|KGN55348.1|//hypothetical protein Csa_4G646220 [Cucumis sativus]
Csa6G361410	690	25.35	54.84	1.11324282388852	4.00686e-14	2.67848683928571e-13	Up	NA	NA	NA	NA	gi|449452937|ref|XP_004144215.1|//PREDICTED: uncharacterized protein LOC101211014 [Cucumis sativus]
Csa3G732470	1464	17.72	38.33	1.1130953942455	1.890234e-21	1.8019243410382e-20	Up	NA	GO:0016746//transferase activity, transferring acyl groups	NA	K13065//shikimate O-hydroxycinnamoyltransferase [EC:2.3.1.133]	gi|449439912|ref|XP_004137729.1|//PREDICTED: uncharacterized acetyltransferase At3g50280 [Cucumis sativus]
Csa1G590300	2136	13.13	28.40	1.11302401349916	1.960338e-23	2.03845830705128e-22	Up	NA	NA	NA	K10775//phenylalanine ammonia-lyase [EC:4.3.1.24]	gi|449452542|ref|XP_004144018.1|//PREDICTED: phenylalanine ammonia-lyase isoform X1 [Cucumis sativus]
Csa5G622560	3428	1.97	4.26	1.11265780076946	4.16764e-05	0.000133235802660535	Up	NA	NA	NA	K17964//leucine-rich PPR motif-containing protein, mitochondrial;K03452//magnesium/proton exchanger;K17285//selenium-binding protein 1	gi|700197064|gb|KGN52241.1|//hypothetical protein Csa_5G622560 [Cucumis sativus]
Csa2G370550	1194	16.61	35.90	1.11193177074804	1.52387e-16	1.1582840070285e-15	Up	NA	NA	GO:0006351//transcription, DNA-templated	K09264//MADS-box transcription factor, plant;K09260//MADS-box transcription enhancer factor 2A	gi|700207637|gb|KGN62756.1|//hypothetical protein Csa_2G370550 [Cucumis sativus];gi|449469781|ref|XP_004152597.1|//PREDICTED: MADS-box protein JOINTLESS-like [Cucumis sativus]
Csa2G404870	1275	15.50	33.50	1.1118928800709	1.52387e-16	1.15873646171875e-15	Up	NA	GO:0003824//catalytic activity	GO:0009064//glutamine family amino acid metabolic process	NA	gi|778673113|ref|XP_004138805.2|//PREDICTED: uncharacterized protein LOC101215742 [Cucumis sativus]
Csa3G081930	968	50.47	109.04	1.11135947550678	2.70244e-31	3.5496421754386e-30	Up	NA	GO:0000166//nucleotide binding;GO:0010181//FMN binding;GO:0003824//catalytic activity;GO:0016491//oxidoreductase activity	GO:0045892//negative regulation of transcription, DNA-templated;GO:0055114//oxidation-reduction process	K03809//NAD(P)H dehydrogenase (quinone) [EC:1.6.5.2]	gi|449466103|ref|XP_004150766.1|//PREDICTED: probable NAD(P)H dehydrogenase (quinone) FQR1-like 1 [Cucumis sativus]
Csa3G543170	1884	106.38	229.73	1.11071232572564	1.661724e-155	1.18055180233577e-153	Up	GO:0031224//intrinsic component of membrane	GO:0032559//adenyl ribonucleotide binding	GO:0051234//establishment of localization	K03301//ATP:ADP antiporter, AAA family	gi|449460531|ref|XP_004147999.1|//PREDICTED: plastidic ATP/ADP-transporter [Cucumis sativus]
Csa1G615160	1566	35.49	76.63	1.11049673130329	4.85326e-44	8.82930459439252e-43	Up	GO:0044424//intracellular part	GO:0043169//cation binding;GO:0016301//kinase activity	GO:0006796//phosphate-containing compound metabolic process	K00858//NAD+ kinase [EC:2.7.1.23]	gi|449442539|ref|XP_004139039.1|//PREDICTED: NAD(H) kinase 1 [Cucumis sativus]
Csa5G623730	1282	11.95	25.79	1.1098011549211	1.125592e-09	5.65439325729032e-09	Up	GO:0043231//intracellular membrane-bounded organelle;GO:0005634//nucleus	GO:0019787//ubiquitin-like protein transferase activity;GO:0046914//transition metal ion binding;GO:0008270//zinc ion binding;GO:0004842//ubiquitin-protein transferase activity;GO:0016874//ligase activity	GO:0006511//ubiquitin-dependent protein catabolic process;GO:0007275//multicellular organism development;GO:0032446//protein modification by small protein conjugation;GO:0016567//protein ubiquitination;GO:0032501//multicellular organismal process;GO:0019941//modification-dependent protein catabolic process	K04506//E3 ubiquitin-protein ligase SIAH1 [EC:2.3.2.27]	gi|778706762|ref|XP_011655908.1|//PREDICTED: E3 ubiquitin-protein ligase SINAT5 [Cucumis sativus]
Csa4G031000	1533	367.25	792.47	1.10959383037529	0	0	Up	NA	GO:0016872//intramolecular lyase activity	GO:0006644//phospholipid metabolic process;GO:0006020//inositol metabolic process	K01858//myo-inositol-1-phosphate synthase [EC:5.5.1.4]	gi|778690463|ref|XP_004149141.2|//PREDICTED: inositol-3-phosphate synthase-like [Cucumis sativus]
Csa2G021560	1428	28.84	62.16	1.10791533916689	9.75962e-33	1.34833756508162e-31	Up	NA	NA	NA	K10664//E3 ubiquitin-protein ligase ATL6/9/15/31/42/55 [EC:2.3.2.27]	gi|700205766|gb|KGN60885.1|//hypothetical protein Csa_2G021560 [Cucumis sativus]
Csa3G234000	891	50.71	109.26	1.10742314863136	1.589414e-34	2.29521757596439e-33	Up	NA	GO:0016616//oxidoreductase activity, acting on the CH-OH group of donors, NAD or NADP as acceptor;GO:0051287//NAD binding	GO:0032787//monocarboxylic acid metabolic process	K00074//3-hydroxybutyryl-CoA dehydrogenase [EC:1.1.1.157]	gi|449457019|ref|XP_004146246.1|//PREDICTED: hydroxyacyl-coenzyme A dehydrogenase, mitochondrial [Cucumis sativus]
Csa3G844870	1307	437.40	941.81	1.10648282065642	0	0	Up	NA	GO:0004197//cysteine-type endopeptidase activity	GO:0006508//proteolysis;GO:0050790//regulation of catalytic activity	K01363//cathepsin B [EC:3.4.22.1]	gi|449446774|ref|XP_004141146.1|//PREDICTED: cathepsin B-like isoform X2 [Cucumis sativus];gi|778686074|ref|XP_011652326.1|//PREDICTED: cathepsin B-like isoform X1 [Cucumis sativus]
Csa1G025830	1335	22.67	48.81	1.1063923606529	2.62602e-24	2.81023118856515e-23	Up	NA	NA	GO:0016070//RNA metabolic process	K06173//tRNA pseudouridine38-40 synthase [EC:5.4.99.12]	gi|449439176|ref|XP_004137363.1|//PREDICTED: uncharacterized protein LOC101205562 [Cucumis sativus]
[truncated: 1,478 more rows]

## Sheet: Gy13_3 dpi
Gene	Length	Gy14_0-Expression	Gy14_3-Expression	log2FoldChange(Gy14_3/Gy14_0)	Pvalue	FDR	Up/Down-Regulation	Cellular Component	Molecular Function	Biological Process	Kegg Orthology	Nr Description
[truncated: 3,141 more rows]

## Sheet: B10_1 dpi
Gene	Length	B10_0-Expression	B10_1-Expression	log2FoldChange(B10_1/B10_0)	Pvalue	FDR	Up/Down-Regulation	Cellular Component	Molecular Function	Biological Process	Kegg Orthology	Nr Description
[truncated: 1,648 more rows]

[truncated: 1 more sheets: B10_3 dpi]
