# Supplementary material for: Transcriptome Profiling of Cucumber (Cucumis sativus L.) Early Response to Pseudomonas syringae pv. lachrymans
Source: Int J Mol Sci. 2021 Apr 18;22(8):4192. doi: 10.3390/ijms22084192 (PMC8072787; doi:10.3390/ijms22084192)
Supplement: Supplementary file 1 [file ijms-22-04192-s001.zip › Suppl_tableS6.xlsx]

## Sheet: Gy14_1 dpi
GeneID	Length	Gy14_0-Expression	Gy14_1-Expression	log2FoldChange(Gy14_1/Gy14_0)	Up/Down-Regulation	TF_family	Included_domain	Excluded_domain	Cellular Component	Molecular Function	Biological Process	Kegg Orthology	Nr Description
Csa6G133770	846	0.01	63.85	12.6404709045901	Up	AP2-EREBP	AP2	-	NA	NA	NA	K13434//pathogenesis-related genes transcriptional activator PTI6	gi|778712954|ref|XP_004140026.2|//PREDICTED: ethylene-responsive transcription factor ERF069-like [Cucumis sativus];gi|700191564|gb|KGN46768.1|//hypothetical protein Csa_6G133770 [Cucumis sativus]
Csa3G822450	759	0.01	4.75	8.89178370321831	Up	HSF	HSF_DNA-bind	-	NA	NA	NA	K09419//heat shock transcription factor, other eukaryote	gi|449438018|ref|XP_004136787.1|//PREDICTED: heat stress transcription factor B-3-like [Cucumis sativus]
Csa6G303740	420	0.01	3.98	8.63662462054365	Up	C2H2	zf-C2H2	PHD	NA	NA	NA	K14841//ribosome biogenesis protein NSA1	gi|449461007|ref|XP_004148235.1|//PREDICTED: zinc finger protein ZAT11 [Cucumis sativus]
Csa1G088450	498	0.01	3.26	8.34872815423108	Up	LOB	DUF260	-	NA	NA	NA	K13944;K01227//mannosyl-glycoprotein endo-beta-N-acetylglucosaminidase [EC:3.2.1.96];K14491//two-component response regulator ARR-B family	gi|700209659|gb|KGN64755.1|//hypothetical protein Csa_1G088450 [Cucumis sativus]
Csa6G017030	933	0.01	2.17	7.76155123244448	Up	AP2-EREBP	AP2	-	NA	NA	NA	K09286//EREBP-like factor	gi|778709855|ref|XP_004138542.2|//PREDICTED: ethylene-responsive transcription factor ERF110-like [Cucumis sativus]
Csa7G432410	1215	0.01	1.62	7.33985000288462	Up	FAR1	FAR1	-	NA	NA	NA	K17604//zinc finger SWIM domain-containing protein 3	gi|700190026|gb|KGN45259.1|//hypothetical protein Csa_7G432410 [Cucumis sativus]
Csa1G024160	1193	0.17	12.95	6.25127354132358	Up	MYB	Myb_DNA-binding	ARID,Response_reg,SNF2_N	NA	NA	NA	K09422//myb proto-oncogene protein, plant	gi|700208734|gb|KGN63830.1|//hypothetical protein Csa_1G024160 [Cucumis sativus];gi|449439539|ref|XP_004137543.1|//PREDICTED: myb-related protein 305-like [Cucumis sativus]
Csa2G174670	1371	0.12	7.23	5.91288933622996	Up	MYB	Myb_DNA-binding	ARID,Response_reg,SNF2_N	GO:0043231//intracellular membrane-bounded organelle	GO:0001071//nucleic acid binding transcription factor activity;GO:0003676//nucleic acid binding	GO:0009743//response to carbohydrate;GO:0006970//response to osmotic stress;GO:0009725//response to hormone;GO:0006351//transcription, DNA-templated;GO:0010038//response to metal ion	K09422//myb proto-oncogene protein, plant	gi|700206482|gb|KGN61601.1|//hypothetical protein Csa_2G174670 [Cucumis sativus];gi|449458822|ref|XP_004147145.1|//PREDICTED: myb-related protein Myb4-like [Cucumis sativus]
Csa4G012390	648	0.6	30.1	5.64865717603855	Up	WRKY	WRKY	-	NA	NA	NA	K18835//WRKY transcription factor 2;K13424//WRKY transcription factor 33	gi|778689952|ref|XP_004152302.2|//PREDICTED: probable WRKY transcription factor 75 [Cucumis sativus]
Csa1G042350	1276	1.7	50.89	5.57169948957605	Up	MYB	Myb_DNA-binding	ARID,Response_reg,SNF2_N	NA	NA	NA	K09422//myb proto-oncogene protein, plant	gi|700209027|gb|KGN64123.1|//hypothetical protein Csa_1G042350 [Cucumis sativus];gi|449439407|ref|XP_004137477.1|//PREDICTED: transcription factor MYB108-like [Cucumis sativus]
Csa1G589140	1739	0.38	15.83	5.3805180266936	Up	bHLH	HLH	-	NA	NA	NA	K13422//transcription factor MYC2	gi|778663004|ref|XP_011659992.1|//PREDICTED: putative transcription factor bHLH041 isoform X1 [Cucumis sativus];gi|700211160|gb|KGN66256.1|//hypothetical protein Csa_1G589140 [Cucumis sativus];gi|778663007|ref|XP_011659993.1|//PREDICTED: putative transcription factor bHLH041 isoform X2 [Cucumis sativus]
Csa6G518170	693	0.56	18.57	5.05140317787782	Up	NAC	NAM	-	GO:0043231//intracellular membrane-bounded organelle	GO:0001071//nucleic acid binding transcription factor activity	NA	NA	gi|778720964|ref|XP_004134944.2|//PREDICTED: NAC domain-containing protein 8-like [Cucumis sativus]
Csa6G055940	1215	0.31	10.14	5.03164562661647	Up	AP2-EREBP	AP2	-	NA	NA	NA	K09286//EREBP-like factor	gi|449446496|ref|XP_004141007.1|//PREDICTED: ethylene-responsive transcription factor ABR1-like [Cucumis sativus]
Csa2G177210	687	0.75	23.86	4.99155963719935	Up	AP2-EREBP	AP2	-	NA	NA	NA	K14516//ethylene-responsive transcription factor 1	gi|449466538|ref|XP_004150983.1|//PREDICTED: ethylene-responsive transcription factor 1B-like [Cucumis sativus]
Csa4G051470	1806	0.95	29.51	4.95713259710106	Up	WRKY	WRKY	-	NA	GO:0043565//sequence-specific DNA binding;GO:0003700//transcription factor activity, sequence-specific DNA binding	GO:0006355//regulation of transcription, DNA-templated	K18835//WRKY transcription factor 2;K13426//WRKY transcription factor 29;K13425//WRKY transcription factor 22;K16225//probable WRKY transcription factor 52	gi|449464068|ref|XP_004149751.1|//PREDICTED: probable WRKY transcription factor 41 [Cucumis sativus]
Csa6G517310	594	0.22	5.57	4.66210189870273	Up	HSF	HSF_DNA-bind	-	NA	NA	NA	K09419//heat shock transcription factor, other eukaryote	gi|778720797|ref|XP_011658207.1|//PREDICTED: heat stress transcription factor B-2a-like [Cucumis sativus]
Csa3G199590	660	0.2	4.95	4.62935662007961	Up	MYB	Myb_DNA-binding	ARID,Response_reg,SNF2_N	NA	NA	NA	K09422//myb proto-oncogene protein, plant	gi|449446099|ref|XP_004140809.1|//PREDICTED: transcription factor MYB44-like [Cucumis sativus]
Csa3G386830	1323	0.09	2.15	4.57826784814715	Up	MYB	Myb_DNA-binding	ARID,Response_reg,SNF2_N	GO:0043231//intracellular membrane-bounded organelle	GO:0003676//nucleic acid binding	NA	K09422//myb proto-oncogene protein, plant	gi|449468552|ref|XP_004151985.1|//PREDICTED: myb-related protein Myb4-like [Cucumis sativus];gi|700202777|gb|KGN57910.1|//hypothetical protein Csa_3G386830 [Cucumis sativus]
Csa2G297760	858	0.3	6.98	4.54019263060113	Up	AP2-EREBP	AP2	-	NA	NA	NA	K09286//EREBP-like factor	gi|700206984|gb|KGN62103.1|//hypothetical protein Csa_2G297760 [Cucumis sativus]
Csa4G608170	1352	0.11	2.16	4.29545588352617	Up	NAC	NAM	-	NA	NA	NA	K12581//CCR4-NOT transcription complex subunit 7/8;K02437//glycine cleavage system H protein;K00162//pyruvate dehydrogenase E1 component beta subunit [EC:1.2.4.1];K13126//polyadenylate-binding protein;K01054//acylglycerol lipase [EC:3.1.1.23]	gi|449453868|ref|XP_004144678.1|//PREDICTED: transcription factor JUNGBRUNNEN 1 [Cucumis sativus];gi|700199783|gb|KGN54941.1|//hypothetical protein Csa_4G608170 [Cucumis sativus]
Csa4G641590	450	1.51	29.3	4.26492411730158	Up	AP2-EREBP	AP2	-	GO:0043231//intracellular membrane-bounded organelle	GO:0001071//nucleic acid binding transcription factor activity;GO:0003676//nucleic acid binding	GO:0006351//transcription, DNA-templated	K09286//EREBP-like factor	gi|449447039|ref|XP_004141277.1|//PREDICTED: ethylene-responsive transcription factor ERF011-like [Cucumis sativus]
Csa2G000420	1444	0.27	5.12	4.24511249783653	Up	bHLH	HLH	-	NA	NA	NA	K13422//transcription factor MYC2	gi|700205415|gb|KGN60534.1|//hypothetical protein Csa_2G000420 [Cucumis sativus];gi|659071355|ref|XP_008459381.1|//PREDICTED: putative transcription factor bHLH041 isoform X1 [Cucumis melo]
Csa1G481720	468	0.29	5.26	4.18093799416473	Up	C2H2	zf-C2H2	PHD	NA	NA	NA	K14841//ribosome biogenesis protein NSA1	gi|700210574|gb|KGN65670.1|//hypothetical protein Csa_1G481720 [Cucumis sativus]
Csa5G608390	1071	0.94	16.16	4.10362263107416	Up	G2-like	G2-like	Response_reg	NA	NA	NA	K14491//two-component response regulator ARR-B family	gi|449434656|ref|XP_004135112.1|//PREDICTED: uncharacterized protein LOC101203539 [Cucumis sativus]
Csa2G406060	399	1.4	13.73	3.72267619200601	Up	WRKY	WRKY	-	NA	GO:0003677//DNA binding;GO:0001071//nucleic acid binding transcription factor activity	GO:0010467//gene expression	K18835//WRKY transcription factor 2;K13424//WRKY transcription factor 33	gi|778673213|ref|XP_004138624.2|//PREDICTED: probable WRKY transcription factor 45 [Cucumis sativus]
Csa3G710870	928	2.53	32.74	3.69384503177984	Up	WRKY	WRKY	-	NA	GO:0003677//DNA binding;GO:0001071//nucleic acid binding transcription factor activity	GO:0010467//gene expression	K18835//WRKY transcription factor 2;K13424//WRKY transcription factor 33;K18834//WRKY transcription factor 1	gi|700203527|gb|KGN58660.1|//hypothetical protein Csa_3G710870 [Cucumis sativus]
Csa1G573650	1137	4.51	57.27	3.66658026486971	Up	bZIP	bZIP_1,bZIP_2,bZIP_Maf	HLH	NA	NA	NA	K09060//plant G-box-binding factor;K14432//ABA responsive element binding factor	gi|449435740|ref|XP_004135652.1|//PREDICTED: light-inducible protein CPRF2-like [Cucumis sativus]
Novel_G000415	1209	0.31	3.81	3.61945087710645	Up	MYB	Myb_DNA-binding	ARID,Response_reg,SNF2_N	NA	NA	NA	K09422//myb proto-oncogene protein, plant	gi|449438468|ref|XP_004137010.1|//PREDICTED: transcription repressor MYB6-like [Cucumis sativus]
Csa3G731130	924	0.96	11.66	3.60238957247934	Up	Trihelix	trihelix	-	NA	NA	NA	NA	gi|778683209|ref|XP_004137715.2|//PREDICTED: trihelix transcription factor GT-3b [Cucumis sativus]
Csa3G730800	1431	5.62	57.54	3.35592318551836	Up	WRKY	WRKY	-	NA	GO:0003677//DNA binding;GO:0001071//nucleic acid binding transcription factor activity	GO:0010467//gene expression	K10268//F-box and leucine-rich repeat protein 2/20;K13424//WRKY transcription factor 33	gi|700203583|gb|KGN58716.1|//hypothetical protein Csa_3G730800 [Cucumis sativus]
Novel_G000153	2013	0.15	1.48	3.30256277002043	Up	mTERF	mTERF	-	NA	NA	NA	K15032//mTERF domain-containing protein, mitochondrial	gi|778678867|ref|XP_011651053.1|//PREDICTED: uncharacterized protein LOC101209993 [Cucumis sativus]
Csa6G121970	810	0.47	4.43	3.23657403687738	Up	MYB	Myb_DNA-binding	ARID,Response_reg,SNF2_N	NA	NA	NA	K09422//myb proto-oncogene protein, plant	gi|778712704|ref|XP_004140052.2|//PREDICTED: transcription repressor MYB6-like [Cucumis sativus]
Csa6G495100	1392	0.53	4.97	3.22918158699909	Up	TAZ	zf-TAZ	PHD	GO:0043231//intracellular membrane-bounded organelle	GO:0000989//transcription factor activity, transcription factor binding;GO:0046914//transition metal ion binding;GO:0004468//lysine N-acetyltransferase activity, acting on acetyl phosphate as donor	GO:0006351//transcription, DNA-templated	K00517	gi|700193401|gb|KGN48605.1|//hypothetical protein Csa_6G495100 [Cucumis sativus]
Csa6G486790	1017	0.37	3.22	3.12146351248567	Up	AP2-EREBP	AP2	-	NA	NA	GO:0010033//response to organic substance;GO:0009987//cellular process	K09286//EREBP-like factor	gi|449448584|ref|XP_004142046.1|//PREDICTED: ethylene-responsive transcription factor ABR1 [Cucumis sativus]
Csa6G363560	462	2.64	21.94	3.05495369104474	Up	FAR1	FAR1	-	NA	NA	NA	K13424//WRKY transcription factor 33	gi|449453049|ref|XP_004144271.1|//PREDICTED: probable WRKY transcription factor 50 isoform X1 [Cucumis sativus]
Csa7G020910	852	1.67	12.53	2.90746640684781	Up	NAC	NAM	-	NA	NA	NA	K13126//polyadenylate-binding protein	gi|449454271|ref|XP_004144879.1|//PREDICTED: protein FEZ-like [Cucumis sativus]
Csa6G513530	1656	6.61	48.52	2.87585737361282	Up	WRKY	WRKY	-	NA	NA	NA	K10268//F-box and leucine-rich repeat protein 2/20;K13424//WRKY transcription factor 33	gi|700193885|gb|KGN49089.1|//hypothetical protein Csa_6G513530 [Cucumis sativus];gi|449433982|ref|XP_004134775.1|//PREDICTED: probable WRKY transcription factor 31 [Cucumis sativus]
Csa2G297180	706	18.15	125.68	2.79171363241108	Up	FAR1	FAR1	-	NA	GO:0043565//sequence-specific DNA binding;GO:0003700//transcription factor activity, sequence-specific DNA binding	GO:0006355//regulation of transcription, DNA-templated	K18835//WRKY transcription factor 2;K13424//WRKY transcription factor 33	gi|700206975|gb|KGN62094.1|//hypothetical protein Csa_2G297180 [Cucumis sativus];gi|449461443|ref|XP_004148451.1|//PREDICTED: probable WRKY transcription factor 51 [Cucumis sativus]
Csa6G518290	534	4.24	28.62	2.75488750216347	Up	AP2-EREBP	AP2	-	NA	NA	NA	K09286//EREBP-like factor;K13433//pathogenesis-related genes transcriptional activator PTI5;K14516//ethylene-responsive transcription factor 1	gi|778721013|ref|XP_004134941.2|//PREDICTED: pathogenesis-related genes transcriptional activator PTI5-like [Cucumis sativus]
Csa5G223070	849	29.25	193.7	2.72731542413249	Up	WRKY	WRKY	-	NA	GO:0003677//DNA binding;GO:0001071//nucleic acid binding transcription factor activity	GO:0010467//gene expression	K18835//WRKY transcription factor 2;K16225//probable WRKY transcription factor 52	gi|700195571|gb|KGN50748.1|//hypothetical protein Csa_5G223070 [Cucumis sativus]
Csa3G567330	513	3.39	20.5	2.59626673125646	Up	WRKY	WRKY	-	NA	GO:0003677//DNA binding;GO:0001071//nucleic acid binding transcription factor activity	GO:0010467//gene expression	K18835//WRKY transcription factor 2;K13424//WRKY transcription factor 33	gi|659098396|ref|XP_008450119.1|//PREDICTED: probable WRKY transcription factor 75 [Cucumis melo]
Csa1G025960	1731	15.53	91.74	2.56249307769466	Up	WRKY	WRKY	-	NA	NA	NA	K13424//WRKY transcription factor 33	gi|525507238|ref|NP_001267657.1|//uncharacterized protein LOC101207158 [Cucumis sativus]
Csa7G071440	762	2.53	14.54	2.52281797922528	Up	C2H2	zf-C2H2	PHD	NA	NA	NA	NA	gi|449438625|ref|XP_004137088.1|//PREDICTED: zinc finger protein ZAT10 [Cucumis sativus]
Csa2G006070	1044	1.44	8.6	2.48471102708566	Up	C3H	zf-CCCH	PHD,SNF2_N,zf-C2H2	NA	GO:0005488//binding	NA	K18753//butyrate response factor 1;K15308//tristetraprolin	gi|449443305|ref|XP_004139420.1|//PREDICTED: zinc finger CCCH domain-containing protein 39-like [Cucumis sativus]
Csa6G522650	786	0.65	3.59	2.4654722207946	Up	WRKY	WRKY	-	NA	GO:0003677//DNA binding;GO:0001071//nucleic acid binding transcription factor activity	GO:0010467//gene expression	K18835//WRKY transcription factor 2;K08819//cyclin-dependent kinase 12/13 [EC:2.7.11.22 2.7.11.23]	gi|700194167|gb|KGN49371.1|//hypothetical protein Csa_6G522650 [Cucumis sativus]
Csa4G614170	711	0.91	4.92	2.43471986514054	Up	G2-like	G2-like	Response_reg	NA	NA	NA	K12741//heterogeneous nuclear ribonucleoprotein A1/A3;K14491//two-component response regulator ARR-B family;K14317//nuclear pore complex protein Nup214	gi|778695370|ref|XP_011653983.1|//PREDICTED: uncharacterized protein LOC105435279 [Cucumis sativus]
Csa1G045480	2047	0.57	3.6	2.42449782852791	Up	WRKY	WRKY	-	NA	NA	NA	K18835//WRKY transcription factor 2;K13424//WRKY transcription factor 33	gi|449469657|ref|XP_004152535.1|//PREDICTED: probable WRKY transcription factor 61 [Cucumis sativus];gi|700209154|gb|KGN64250.1|//hypothetical protein Csa_1G045480 [Cucumis sativus]
Novel_G000104	1047	1.32	6.48	2.29545588352617	Up	MYB	Myb_DNA-binding	ARID,Response_reg,SNF2_N	NA	NA	NA	K09422//myb proto-oncogene protein, plant	gi|778670368|ref|XP_004147356.2|//PREDICTED: myb-related protein 330-like [Cucumis sativus]
Csa3G727990	990	65.44	320.36	2.29144937137002	Up	WRKY	WRKY	-	NA	GO:0003677//DNA binding;GO:0001071//nucleic acid binding transcription factor activity	GO:0010467//gene expression	K18835//WRKY transcription factor 2;K13424//WRKY transcription factor 33;K16225//probable WRKY transcription factor 52	gi|700203548|gb|KGN58681.1|//WRKY transcription factor [Cucumis sativus]
Csa1G009580	1989	0.53	2.43	2.19689204904258	Up	WRKY	WRKY	-	NA	GO:0043565//sequence-specific DNA binding;GO:0003700//transcription factor activity, sequence-specific DNA binding	GO:0006355//regulation of transcription, DNA-templated	K18835//WRKY transcription factor 2;K13424//WRKY transcription factor 33;K01892//histidyl-tRNA synthetase [EC:6.1.1.21];K18834//WRKY transcription factor 1	gi|778655906|ref|XP_011660002.1|//PREDICTED: probable WRKY transcription factor 61 isoform X2 [Cucumis sativus];gi|778655903|ref|XP_011659995.1|//PREDICTED: probable WRKY transcription factor 61 isoform X1 [Cucumis sativus]
Csa3G119700	1014	16.26	72.88	2.16419570172702	Up	WRKY	WRKY	-	NA	NA	NA	K13425//WRKY transcription factor 22;K16225//probable WRKY transcription factor 52	gi|778676947|ref|XP_011650695.1|//PREDICTED: probable WRKY transcription factor 46 [Cucumis sativus]
Csa4G193250	993	2.3	8.89	2.13070369164459	Up	NAC	NAM	-	NA	GO:0003676//nucleic acid binding	NA	K00162//pyruvate dehydrogenase E1 component beta subunit [EC:1.2.4.1];K13126//polyadenylate-binding protein;K05941//glutathione gamma-glutamylcysteinyltransferase [EC:2.3.2.15]	gi|449459638|ref|XP_004147553.1|//PREDICTED: NAC domain-containing protein 100-like [Cucumis sativus]
Csa6G486960	925	40.28	176.35	2.13030598730683	Up	FAR1	FAR1	-	NA	GO:0043565//sequence-specific DNA binding;GO:0003700//transcription factor activity, sequence-specific DNA binding	GO:0006355//regulation of transcription, DNA-templated	K18835//WRKY transcription factor 2;K13424//WRKY transcription factor 33	gi|449448420|ref|XP_004141964.1|//PREDICTED: probable WRKY transcription factor 51 [Cucumis sativus]
Csa2G382650	1083	13.51	57.81	2.09729139769119	Up	WRKY	WRKY	-	NA	GO:0003677//DNA binding;GO:0043565//sequence-specific DNA binding;GO:0003700//transcription factor activity, sequence-specific DNA binding;GO:0001071//nucleic acid binding transcription factor activity	GO:0010467//gene expression;GO:0006355//regulation of transcription, DNA-templated	K18835//WRKY transcription factor 2;K10268//F-box and leucine-rich repeat protein 2/20;K18834//WRKY transcription factor 1	gi|700207873|gb|KGN62992.1|//hypothetical protein Csa_2G382650 [Cucumis sativus];gi|525506965|ref|NP_001267528.1|//probable WRKY transcription factor 40-like [Cucumis sativus]
Csa5G165850	753	1.54	6.51	2.07972719247073	Up	AP2-EREBP	AP2	-	NA	NA	NA	K09286//EREBP-like factor	gi|449469359|ref|XP_004152388.1|//PREDICTED: ethylene-responsive transcription factor 1A-like [Cucumis sativus]
Csa3G146290	1092	2.18	8.61	1.98168510261992	Up	HSF	HSF_DNA-bind	-	NA	NA	NA	K09419//heat shock transcription factor, other eukaryote	gi|449433295|ref|XP_004134433.1|//PREDICTED: heat stress transcription factor A-6b [Cucumis sativus]
Csa5G606310	873	44.12	172.2	1.96458044669282	Up	NAC	NAM	-	NA	NA	NA	K02437//glycine cleavage system H protein;K13126//polyadenylate-binding protein;K00162//pyruvate dehydrogenase E1 component beta subunit [EC:1.2.4.1];K05941//glutathione gamma-glutamylcysteinyltransferase [EC:2.3.2.15]	gi|449434768|ref|XP_004135168.1|//PREDICTED: NAC transcription factor 29-like [Cucumis sativus]
Csa3G018320	1035	6.68	25.39	1.92634038717345	Up	AP2-EREBP	AP2	-	NA	NA	NA	K09286//EREBP-like factor	gi|449458980|ref|XP_004147224.1|//PREDICTED: ethylene-responsive transcription factor 6 [Cucumis sativus]
Csa3G017320	840	18.82	70.23	1.89982080710463	Up	AP2-EREBP	AP2	-	NA	NA	NA	K09286//EREBP-like factor	gi|449458984|ref|XP_004147226.1|//PREDICTED: ethylene-responsive transcription factor 2 [Cucumis sativus]
Csa6G190300	2155	8.73	32.57	1.89949016076646	Up	GRAS	GRAS	-	NA	NA	NA	K14494//DELLA protein	gi|449450910|ref|XP_004143205.1|//PREDICTED: scarecrow-like protein 34 [Cucumis sativus]
Csa2G369200	924	3.29	12.21	1.89190371125216	Up	bHLH	HLH	-	NA	NA	NA	K18485//myogenic factor 6;K13422//transcription factor MYC2	gi|449469829|ref|XP_004152621.1|//PREDICTED: transcription factor bHLH96 [Cucumis sativus]
Csa7G049170	897	8.63	31.72	1.87796030652502	Up	WRKY	WRKY	-	NA	GO:0003677//DNA binding;GO:0001071//nucleic acid binding transcription factor activity	GO:0010467//gene expression	K13425//WRKY transcription factor 22	gi|525507180|ref|NP_001267628.1|//probable WRKY transcription factor 69-like [Cucumis sativus]
Csa6G091830	954	10.37	37.5	1.85447470145738	Up	AP2-EREBP	AP2	-	NA	NA	NA	K09286//EREBP-like factor	gi|700191206|gb|KGN46410.1|//hypothetical protein Csa_6G091830 [Cucumis sativus];gi|778722055|ref|XP_011658395.1|//PREDICTED: ethylene-responsive transcription factor ERF113 [Cucumis sativus]
Csa3G183960	808	5.44	19.51	1.84253522135869	Up	MYB	Myb_DNA-binding	ARID,Response_reg,SNF2_N	NA	NA	NA	K12134//circadian clock associated 1;K12133//MYB-related transcription factor LHY	gi|778679712|ref|XP_011651186.1|//PREDICTED: protein REVEILLE 6 isoform X3 [Cucumis sativus];gi|778679707|ref|XP_011651185.1|//PREDICTED: protein REVEILLE 6 isoform X1 [Cucumis sativus]
Csa6G382950	891	19.23	68.89	1.84093581535395	Up	NAC	NAM	-	NA	GO:0003676//nucleic acid binding	NA	K02437//glycine cleavage system H protein;K13126//polyadenylate-binding protein;K00162//pyruvate dehydrogenase E1 component beta subunit [EC:1.2.4.1];K05941//glutathione gamma-glutamylcysteinyltransferase [EC:2.3.2.15]	gi|449464170|ref|XP_004149802.1|//PREDICTED: NAC domain-containing protein 2-like [Cucumis sativus]
Csa2G338830	900	42	148.44	1.82141867314404	Up	NAC	NAM	-	NA	GO:0003676//nucleic acid binding	NA	K02437//glycine cleavage system H protein;K00162//pyruvate dehydrogenase E1 component beta subunit [EC:1.2.4.1];K13126//polyadenylate-binding protein;K05941//glutathione gamma-glutamylcysteinyltransferase [EC:2.3.2.15]	gi|449459190|ref|XP_004147329.1|//PREDICTED: NAC domain-containing protein 2 [Cucumis sativus]
Csa1G572390	1827	9.54	32.87	1.7847102850748	Up	NAC	NAM	-	GO:0005634//nucleus	GO:0003677//DNA binding	GO:0006355//regulation of transcription, DNA-templated	K12581//CCR4-NOT transcription complex subunit 7/8;K13126//polyadenylate-binding protein;K05941//glutathione gamma-glutamylcysteinyltransferase [EC:2.3.2.15];K01054//acylglycerol lipase [EC:3.1.1.23]	gi|778662593|ref|XP_011659914.1|//PREDICTED: NAC transcription factor 25-like [Cucumis sativus]
Csa3G852470	960	14.47	47.66	1.71971402965855	Up	NAC	NAM	-	NA	NA	NA	K02437//glycine cleavage system H protein;K00162//pyruvate dehydrogenase E1 component beta subunit [EC:1.2.4.1];K13126//polyadenylate-binding protein;K05941//glutathione gamma-glutamylcysteinyltransferase [EC:2.3.2.15]	gi|449460145|ref|XP_004147806.1|//PREDICTED: NAC domain-containing protein 72-like isoform X2 [Cucumis sativus]
Csa7G413890	831	2.3	7.54	1.71293066232429	Up	MYB	Myb_DNA-binding	ARID,Response_reg,SNF2_N	NA	NA	NA	K09422//myb proto-oncogene protein, plant	gi|778728329|ref|XP_004136147.2|//PREDICTED: transcription factor MYB108-like [Cucumis sativus]
Csa7G407710	2905	1.13	3.65	1.69157369135219	Up	GRAS	GRAS	-	NA	NA	GO:0006355//regulation of transcription, DNA-templated	K14494//DELLA protein	gi|449436743|ref|XP_004136152.1|//PREDICTED: DELLA protein RGL2 [Cucumis sativus];gi|700189785|gb|KGN45018.1|//hypothetical protein Csa_7G407710 [Cucumis sativus]
Csa3G389850	675	2.88	9.27	1.68650052718322	Up	AP2-EREBP	AP2	-	GO:0043231//intracellular membrane-bounded organelle	GO:0001071//nucleic acid binding transcription factor activity;GO:0003676//nucleic acid binding	GO:0006351//transcription, DNA-templated	K14516//ethylene-responsive transcription factor 1	gi|449468546|ref|XP_004151982.1|//PREDICTED: ethylene-responsive transcription factor 1B-like [Cucumis sativus]
Csa5G151530	957	1.85	5.94	1.68293766028445	Up	AP2-EREBP	AP2	-	NA	NA	NA	K13434//pathogenesis-related genes transcriptional activator PTI6	gi|449452420|ref|XP_004143957.1|//PREDICTED: ethylene-responsive transcription factor CRF2-like [Cucumis sativus]
Csa3G839790	720	2.3	6.39	1.65433620376182	Up	LOB	DUF260	-	NA	NA	NA	K01227//mannosyl-glycoprotein endo-beta-N-acetylglucosaminidase [EC:3.2.1.96];K13944	gi|700204568|gb|KGN59701.1|//hypothetical protein Csa_3G839790 [Cucumis sativus]
Csa7G428890	1784	34.36	108.01	1.65236294748988	Up	bHLH	HLH	-	NA	GO:0046983//protein dimerization activity	NA	K16189//phytochrome-interacting factor 4;K11253//histone H3;K12126//phytochrome-interacting factor 3	gi|778728699|ref|XP_011659462.1|//PREDICTED: transcription factor bHLH130 isoform X3 [Cucumis sativus];gi|778728696|ref|XP_011659461.1|//PREDICTED: transcription factor bHLH130 isoform X2 [Cucumis sativus];gi|778728688|ref|XP_011659459.1|//PREDICTED: transcription factor bHLH130 isoform X1 [Cucumis sativus]
Csa1G076100	933	6.92	21.45	1.63213370475018	Up	NAC	NAM	-	NA	NA	NA	NA	gi|778658830|ref|XP_011653355.1|//PREDICTED: NAC domain-containing protein 8-like [Cucumis sativus]
Csa2G428380	882	17.14	52.92	1.62644595216618	Up	WRKY	WRKY	-	NA	GO:0003677//DNA binding;GO:0001071//nucleic acid binding transcription factor activity	GO:0010467//gene expression	K13425//WRKY transcription factor 22;K13424//WRKY transcription factor 33	gi|525507250|ref|NP_001267663.1|//probable WRKY transcription factor 15-like [Cucumis sativus]
Csa3G598900	1587	4.81	14.79	1.62051325332903	Up	bHLH	HLH	-	NA	NA	NA	K16190//glucuronokinase [EC:2.7.1.43];K13422//transcription factor MYC2	gi|778681821|ref|XP_011651587.1|//PREDICTED: transcription factor ICE1 [Cucumis sativus]
Csa2G354820	693	9.16	27.95	1.60942877963361	Up	C2H2	zf-C2H2	PHD	NA	NA	NA	NA	gi|700207337|gb|KGN62456.1|//hypothetical protein Csa_2G354820 [Cucumis sativus]
Csa7G043020	1578	9.68	29.29	1.59732924060477	Up	WRKY	WRKY	-	NA	NA	NA	K13424//WRKY transcription factor 33	gi|778723759|ref|XP_011658698.1|//PREDICTED: probable WRKY transcription factor 31 [Cucumis sativus]
Csa3G645940	630	19.5	58.99	1.59699628519163	Up	Tify	tify	GATA	NA	NA	NA	K13464//jasmonate ZIM domain-containing protein	gi|449453375|ref|XP_004144433.1|//PREDICTED: protein TIFY 11A [Cucumis sativus]
CsaUNG031640	954	13.64	40.69	1.57683063604954	Up	AP2-EREBP	AP2	-	NA	NA	NA	K09287//RAV-like factor	gi|449466693|ref|XP_004151060.1|//PREDICTED: AP2/ERF and B3 domain-containing transcription factor RAV1-like [Cucumis sativus]
Csa1G023060	735	15.95	47.47	1.5734596257772	Up	LOB	DUF260	-	NA	NA	NA	NA	gi|449440939|ref|XP_004138241.1|//PREDICTED: LOB domain-containing protein 41-like [Cucumis sativus]
Csa4G038810	1218	11.76	34.95	1.57140439542643	Up	C2H2	zf-C2H2	PHD	NA	NA	NA	K12309//beta-galactosidase [EC:3.2.1.23]	gi|449462892|ref|XP_004149169.1|//PREDICTED: protein indeterminate-domain 1-like [Cucumis sativus]
Csa3G824990	861	7.9	21.2	1.56790513672266	Up	NAC	NAM	-	NA	NA	NA	K00162//pyruvate dehydrogenase E1 component beta subunit [EC:1.2.4.1];K13126//polyadenylate-binding protein;K05941//glutathione gamma-glutamylcysteinyltransferase [EC:2.3.2.15]	gi|449437840|ref|XP_004136698.1|//PREDICTED: NAC domain-containing protein 100 isoform X1 [Cucumis sativus]
Csa6G327430	981	8.87	25.98	1.55039542114682	Up	WRKY	WRKY	-	NA	NA	NA	K18835//WRKY transcription factor 2;K13424//WRKY transcription factor 33	gi|778714810|ref|XP_011657294.1|//PREDICTED: probable WRKY transcription factor 48 [Cucumis sativus]
Csa1G240590	876	3.92	11.48	1.55019708256048	Up	HSF	HSF_DNA-bind	-	GO:0043231//intracellular membrane-bounded organelle	GO:0003677//DNA binding;GO:0001071//nucleic acid binding transcription factor activity	GO:0006351//transcription, DNA-templated	K09419//heat shock transcription factor, other eukaryote	gi|449465338|ref|XP_004150385.1|//PREDICTED: heat stress transcription factor C-1-like [Cucumis sativus]
Csa4G290190	2114	4.7	11.69	1.52217423026541	Up	MYB	Myb_DNA-binding	ARID,Response_reg,SNF2_N	NA	GO:0003677//DNA binding	NA	K17046//protein DEK	gi|449448952|ref|XP_004142229.1|//PREDICTED: bromodomain-containing protein DDB_G0270170 isoform X1 [Cucumis sativus]
Csa3G101810	891	81.63	233.92	1.5188438539816	Up	NAC	NAM	-	NA	NA	NA	K02437//glycine cleavage system H protein;K00162//pyruvate dehydrogenase E1 component beta subunit [EC:1.2.4.1];K13126//polyadenylate-binding protein;K05941//glutathione gamma-glutamylcysteinyltransferase [EC:2.3.2.15]	gi|449431824|ref|XP_004133700.1|//PREDICTED: NAC domain-containing protein 72-like [Cucumis sativus]
Csa3G630280	1584	3.27	9.34	1.51413191421158	Up	AP2-EREBP	AP2	-	GO:0005634//nucleus	GO:0003677//DNA binding;GO:0003700//transcription factor activity, sequence-specific DNA binding	GO:0006355//regulation of transcription, DNA-templated;GO:0007275//multicellular organism development	NA	gi|778682164|ref|XP_011651656.1|//PREDICTED: ethylene-responsive transcription factor-like protein At4g13040 isoform X1 [Cucumis sativus]
Csa1G425940	726	25.76	73.07	1.50414661389048	Up	bHLH	HLH	-	NA	NA	NA	K13422//transcription factor MYC2	gi|449457201|ref|XP_004146337.1|//PREDICTED: transcription factor bHLH35-like [Cucumis sativus]
Csa2G352410	819	3.57	10.2	1.48888652916611	Up	MYB	Myb_DNA-binding	ARID,Response_reg,SNF2_N	GO:0043231//intracellular membrane-bounded organelle	GO:0003677//DNA binding;GO:0003676//nucleic acid binding	NA	K09422//myb proto-oncogene protein, plant	gi|449450324|ref|XP_004142913.1|//PREDICTED: transcription factor RAX3 [Cucumis sativus]
Csa6G495020	702	16.58	45.3	1.45006704343785	Up	LOB	DUF260	-	NA	NA	NA	K01227//mannosyl-glycoprotein endo-beta-N-acetylglucosaminidase [EC:3.2.1.96]	gi|449448242|ref|XP_004141875.1|//PREDICTED: LOB domain-containing protein 37-like [Cucumis sativus]
Csa3G135120	687	12.83	34.47	1.42582012827759	Up	AP2-EREBP	AP2	-	NA	NA	GO:0006351//transcription, DNA-templated	K14516//ethylene-responsive transcription factor 1	gi|449432562|ref|XP_004134068.1|//PREDICTED: ethylene-responsive transcription factor 1B [Cucumis sativus]
Csa4G664530	1056	28.78	75.41	1.38968925759344	Up	bZIP	bZIP_1,bZIP_2,bZIP_Maf	HLH	NA	NA	NA	NA	gi|778697290|ref|XP_011654291.1|//PREDICTED: bZIP transcription factor 60 [Cucumis sativus]
Csa3G902190	945	85.35	223.33	1.3877140035611	Up	PLATZ	PLATZ	-	NA	NA	NA	NA	gi|700205243|gb|KGN60376.1|//hypothetical protein Csa_3G902190 [Cucumis sativus]
Csa1G597690	696	19.16	49.84	1.37920650728782	Up	Tify	tify	GATA	NA	NA	NA	K13464//jasmonate ZIM domain-containing protein	gi|449452598|ref|XP_004144046.1|//PREDICTED: protein TIFY 10A [Cucumis sativus]
Csa6G446400	678	4.98	12.87	1.36979440615262	Up	TCP	TCP	-	NA	NA	NA	K13035//beta-cyano-L-alanine hydratase/nitrilase [EC:3.5.5.4 4.2.1.65];K16221//transcription factor TCP21 (protein CCA1 HIKING EXPEDITION)	gi|700192975|gb|KGN48179.1|//hypothetical protein Csa_6G446400 [Cucumis sativus]
Csa6G092010	774	66.13	169.81	1.36054461407433	Up	NAC	NAM	-	NA	GO:0003676//nucleic acid binding	NA	K13126//polyadenylate-binding protein;K00162//pyruvate dehydrogenase E1 component beta subunit [EC:1.2.4.1];K05941//glutathione gamma-glutamylcysteinyltransferase [EC:2.3.2.15]	gi|449445576|ref|XP_004140548.1|//PREDICTED: NAC domain-containing protein 18 [Cucumis sativus]
Csa3G523580	978	61.4	154.22	1.32867931239038	Up	NAC	NAM	-	NA	NA	NA	K13126//polyadenylate-binding protein;K05941//glutathione gamma-glutamylcysteinyltransferase [EC:2.3.2.15]	gi|449466123|ref|XP_004150776.1|//PREDICTED: NAC domain-containing protein 21/22-like isoform X1 [Cucumis sativus]
Csa6G014640	3932	31.5	77.32	1.31624836910339	Up	C2C2-YABBY	YABBY	-	NA	NA	NA	K12472//epidermal growth factor receptor substrate 15	gi|778709716|ref|XP_011656443.1|//PREDICTED: uncharacterized protein LOC105435747 [Cucumis sativus]
Csa3G852460	957	13.99	34.61	1.30679297900069	Up	NAC	NAM	-	NA	GO:0003676//nucleic acid binding	NA	K02437//glycine cleavage system H protein;K13126//polyadenylate-binding protein;K00162//pyruvate dehydrogenase E1 component beta subunit [EC:1.2.4.1];K05941//glutathione gamma-glutamylcysteinyltransferase [EC:2.3.2.15]	gi|449460147|ref|XP_004147807.1|//PREDICTED: NAC domain-containing protein 18-like [Cucumis sativus]
Csa1G085390	1598	63.09	155.62	1.30254422888471	Up	C2H2	zf-C2H2	PHD	NA	NA	NA	K14794//ribosomal RNA-processing protein 12;K12309//beta-galactosidase [EC:3.2.1.23]	gi|449462075|ref|XP_004148767.1|//PREDICTED: protein indeterminate-domain 2 [Cucumis sativus];gi|700209647|gb|KGN64743.1|//hypothetical protein Csa_1G085390 [Cucumis sativus]
Csa6G046240	702	11.61	28.48	1.29458117410083	Up	MYB	Myb_DNA-binding	ARID,Response_reg,SNF2_N	NA	NA	NA	K05674//ATP-binding cassette, subfamily C (CFTR/MRP), member 10;K08869//aarF domain-containing kinase;K01184//polygalacturonase [EC:3.2.1.15];K17613//calcineurin-binding protein cabin-1	gi|449446301|ref|XP_004140910.1|//PREDICTED: transcription factor DIVARICATA [Cucumis sativus]
Csa4G011770	717	182.94	446.42	1.28703110641232	Up	NAC	NAM	-	NA	NA	NA	K13126//polyadenylate-binding protein;K00162//pyruvate dehydrogenase E1 component beta subunit [EC:1.2.4.1];K05941//glutathione gamma-glutamylcysteinyltransferase [EC:2.3.2.15]	gi|449468834|ref|XP_004152126.1|//PREDICTED: NAC transcription factor 25 [Cucumis sativus]
Csa2G382490	2392	25.83	62.61	1.27734545776299	Up	HB	Homeobox,KNOX1,KNOX2	-	NA	NA	NA	K16670//homeobox protein Meis2;K15613//homeobox protein Meis1	gi|700207857|gb|KGN62976.1|//hypothetical protein Csa_2G382490 [Cucumis sativus];gi|778672603|ref|XP_011649837.1|//PREDICTED: homeobox protein knotted-1-like 3 isoform X2 [Cucumis sativus];gi|449441886|ref|XP_004138713.1|//PREDICTED: homeobox protein knotted-1-like 3 isoform X1 [Cucumis sativus]
Csa6G031440	1116	3.81	8.97	1.23531698742594	Up	G2-like	G2-like	Response_reg	NA	NA	NA	K14491//two-component response regulator ARR-B family	gi|778710070|ref|XP_011656513.1|//PREDICTED: probable transcription factor GLK2 [Cucumis sativus]
Csa4G038760	906	4.48	10.51	1.23019203190457	Up	OFP	Ovate	-	NA	NA	NA	K01870//isoleucyl-tRNA synthetase [EC:6.1.1.5]	gi|449462866|ref|XP_004149156.1|//PREDICTED: transcription repressor OFP7 [Cucumis sativus]
Csa1G426980	846	15.81	36.51	1.20745430107651	Up	WRKY	WRKY	-	NA	GO:0003677//DNA binding;GO:0001071//nucleic acid binding transcription factor activity	GO:0010467//gene expression	K13425//WRKY transcription factor 22	gi|700210401|gb|KGN65497.1|//hypothetical protein Csa_1G426980 [Cucumis sativus]
Csa6G289740	801	20.12	46.26	1.20113496083066	Up	C2C2-Dof	zf-Dof	-	NA	NA	NA	K16222//Dof zinc finger protein DOF5.5	gi|449463677|ref|XP_004149558.1|//PREDICTED: dof zinc finger protein DOF5.3-like [Cucumis sativus]
Csa1G042290	2106	20.55	47.17	1.19873120696055	Up	AP2-EREBP	AP2	-	GO:0005634//nucleus	GO:0003677//DNA binding;GO:0003700//transcription factor activity, sequence-specific DNA binding	GO:0006355//regulation of transcription, DNA-templated	K13434//pathogenesis-related genes transcriptional activator PTI6	gi|449439397|ref|XP_004137472.1|//PREDICTED: ethylene-responsive transcription factor CRF3-like [Cucumis sativus]
Csa1G420320	1128	306.31	702.2	1.19688952933106	Up	C2C2-CO-like	CCT,zf-B_box	GATA,PLATZ	NA	NA	NA	K12135//zinc finger protein CONSTANS;K12129//pseudo-response regulator 7	gi|778660656|ref|XP_011656660.1|//PREDICTED: zinc finger protein CONSTANS-LIKE 5-like isoform X2 [Cucumis sativus]
Csa6G290790	603	9.58	21.67	1.17760159235749	Up	LOB	DUF260	-	NA	NA	NA	K13944;K01227//mannosyl-glycoprotein endo-beta-N-acetylglucosaminidase [EC:3.2.1.96]	gi|449463671|ref|XP_004149555.1|//PREDICTED: LOB domain-containing protein 1-like [Cucumis sativus]
Csa3G778360	705	11.19	25.21	1.17178608188215	Up	OFP	Ovate	-	NA	NA	NA	NA	gi|778684415|ref|XP_004136703.2|//PREDICTED: transcription repressor OFP15-like [Cucumis sativus]
Csa6G093640	879	50.41	111.99	1.15158805501486	Up	TCP	TCP	-	NA	NA	NA	K13035//beta-cyano-L-alanine hydratase/nitrilase [EC:3.5.5.4 4.2.1.65];K16221//transcription factor TCP21 (protein CCA1 HIKING EXPEDITION)	gi|778711824|ref|XP_011656799.1|//PREDICTED: transcription factor TCP20-like [Cucumis sativus]
Csa3G740800	1347	3.35	7.43	1.14920111519346	Up	MYB	Myb_DNA-binding	ARID,Response_reg,SNF2_N	NA	NA	NA	K09422//myb proto-oncogene protein, plant	gi|449440407|ref|XP_004137976.1|//PREDICTED: transcription factor RAX2 [Cucumis sativus];gi|700203855|gb|KGN58988.1|//hypothetical protein Csa_3G740800 [Cucumis sativus]
Csa5G167110	483	75.08	164.44	1.13106072173306	Up	AP2-EREBP	AP2	-	GO:0043231//intracellular membrane-bounded organelle	GO:0001071//nucleic acid binding transcription factor activity;GO:0003676//nucleic acid binding	GO:0006351//transcription, DNA-templated	K09286//EREBP-like factor	gi|449451860|ref|XP_004143678.1|//PREDICTED: ethylene-responsive transcription factor ERF106 [Cucumis sativus]
Novel_G000146	2280	4.61	10.9	1.13008751867702	Up	mTERF	mTERF	-	NA	NA	NA	K15032//mTERF domain-containing protein, mitochondrial	gi|778678818|ref|XP_011651040.1|//PREDICTED: uncharacterized protein LOC101221269 isoform X2 [Cucumis sativus]
Csa1G042920	1023	19.68	42.8	1.12088057594927	Up	Tify	tify	GATA	NA	NA	NA	K13464//jasmonate ZIM domain-containing protein	gi|449439473|ref|XP_004137510.1|//PREDICTED: protein TIFY 6B isoform X1 [Cucumis sativus]
Csa2G370550	1194	16.61	35.9	1.11193177074804	Up	MADS	SRF-TF	-	NA	NA	GO:0006351//transcription, DNA-templated	K09264//MADS-box transcription factor, plant;K09260//MADS-box transcription enhancer factor 2A	gi|700207637|gb|KGN62756.1|//hypothetical protein Csa_2G370550 [Cucumis sativus];gi|449469781|ref|XP_004152597.1|//PREDICTED: MADS-box protein JOINTLESS-like [Cucumis sativus]
Csa4G166950	870	14.18	30	1.08110496814373	Up	C2H2	zf-C2H2	PHD	GO:0044464//cell part	GO:0046914//transition metal ion binding	NA	NA	gi|700198693|gb|KGN53851.1|//hypothetical protein Csa_4G166950 [Cucumis sativus]
Csa3G062590	1779	15.83	33.24	1.07025912663316	Up	NAC	NAM	-	GO:0005634//nucleus;GO:0016021//integral component of membrane	GO:0003677//DNA binding	GO:0006355//regulation of transcription, DNA-templated	K12581//CCR4-NOT transcription complex subunit 7/8;K13126//polyadenylate-binding protein;K01054//acylglycerol lipase [EC:3.1.1.23]	gi|778675916|ref|XP_004149581.2|//PREDICTED: protein NTM1-like 8 isoform X2 [Cucumis sativus];gi|778675913|ref|XP_011650496.1|//PREDICTED: protein NTM1-like 8 isoform X1 [Cucumis sativus]
Csa4G011750	1476	25.52	53.53	1.06871932355012	Up	C2C2-CO-like	CCT,zf-B_box	GATA,PLATZ	NA	NA	NA	K12128//pseudo-response regulator 9;K12135//zinc finger protein CONSTANS;K12129//pseudo-response regulator 7	gi|449468832|ref|XP_004152125.1|//PREDICTED: zinc finger protein CONSTANS-LIKE 14-like [Cucumis sativus]
Csa3G278920	909	6.27	12.98	1.0497530351971	Up	LOB	DUF260	-	NA	NA	NA	K13945	gi|700202618|gb|KGN57751.1|//hypothetical protein Csa_3G278920 [Cucumis sativus]
Csa6G499870	1131	7.96	16.47	1.04900021918271	Up	C2H2	zf-C2H2	PHD	NA	GO:0005488//binding	NA	K09201//transcription factor YY;K09191//general transcription factor IIIA;K12309//beta-galactosidase [EC:3.2.1.23]	gi|449451615|ref|XP_004143557.1|//PREDICTED: protein SENSITIVE TO PROTON RHIZOTOXICITY 1-like [Cucumis sativus]
Csa3G009510	1359	186.66	386.08	1.04848701996021	Up	PLATZ	PLATZ	-	NA	NA	NA	NA	gi|778675037|ref|XP_004148761.2|//PREDICTED: uncharacterized protein LOC101210628 [Cucumis sativus]
Csa6G421660	645	66.5	137.27	1.04559011697384	Up	AP2-EREBP	AP2	-	NA	NA	NA	K09286//EREBP-like factor	gi|449444731|ref|XP_004140127.1|//PREDICTED: ethylene-responsive transcription factor 3-like [Cucumis sativus]
Csa6G039540	1005	55.76	114.44	1.03728893645476	Up	C2C2-CO-like	CCT,zf-B_box	GATA,PLATZ	GO:0044464//cell part	GO:0046914//transition metal ion binding	NA	K12130//pseudo-response regulator 5;K12135//zinc finger protein CONSTANS	gi|449446203|ref|XP_004140861.1|//PREDICTED: zinc finger protein CONSTANS-LIKE 6 [Cucumis sativus]
Csa7G328830	891	7.12	14.55	1.03107000682925	Up	WRKY	WRKY	-	NA	GO:0003677//DNA binding;GO:0001071//nucleic acid binding transcription factor activity	GO:0010467//gene expression	K13425//WRKY transcription factor 22;K16225//probable WRKY transcription factor 52	gi|525507306|ref|NP_001267693.1|//probable WRKY transcription factor 46-like [Cucumis sativus]
Csa6G076720	1220	10.88	22.17	1.02693021361697	Up	MADS	SRF-TF	-	NA	NA	NA	K09260//MADS-box transcription enhancer factor 2A	gi|700191019|gb|KGN46223.1|//hypothetical protein Csa_6G076720 [Cucumis sativus];gi|449471671|ref|XP_004153376.1|//PREDICTED: MADS-box protein SOC1-like [Cucumis sativus]
Csa1G005660	561	18.4	37.27	1.01830905278447	Up	LIM	LIM	-	NA	GO:0046914//transition metal ion binding	NA	K09377//cysteine and glycine-rich protein	gi|449440708|ref|XP_004138126.1|//PREDICTED: LIM domain-containing protein WLIM1-like [Cucumis sativus]
Csa6G057150	1092	6.89	13.88	1.01043167987397	Up	bZIP	bZIP_1,bZIP_2,bZIP_Maf	HLH	NA	GO:0005488//binding	NA	K09060//plant G-box-binding factor;K16241//transcription factor HY5;K14432//ABA responsive element binding factor	gi|449446510|ref|XP_004141014.1|//PREDICTED: transcription factor VIP1 [Cucumis sativus]
Csa6G051520	1296	8.46	0.01	-9.72451385311995	Down	EIL	EIN3	-	GO:0043231//intracellular membrane-bounded organelle	GO:0001071//nucleic acid binding transcription factor activity	GO:0010467//gene expression	K14514//ethylene-insensitive protein 3	gi|700190871|gb|KGN46075.1|//hypothetical protein Csa_6G051520 [Cucumis sativus]
Novel_G000437	772	5.15	0.01	-9.00842862207058	Down	MYB	Myb_DNA-binding	ARID,Response_reg,SNF2_N	GO:0005634//nucleus	GO:0003677//DNA binding	NA	NA	gi|778726246|ref|XP_011659078.1|//PREDICTED: protein RADIALIS-like 2 [Cucumis sativus]
Novel_G000326	1981	4.71	0.01	-8.87958324961278	Down	mTERF	mTERF	-	NA	NA	NA	K15032//mTERF domain-containing protein, mitochondrial	gi|778704338|ref|XP_011655521.1|//PREDICTED: uncharacterized protein LOC101219984 [Cucumis sativus]
Novel_G000317	1674	2.69	0.01	-8.07146236255663	Down	mTERF	mTERF	-	NA	NA	NA	K15032//mTERF domain-containing protein, mitochondrial	gi|659090428|ref|XP_008446011.1|//PREDICTED: uncharacterized protein LOC103488865 [Cucumis melo]
Csa3G165690	1178	2.6	0.01	-8.02236781302845	Down	MYB	Myb_DNA-binding	ARID,Response_reg,SNF2_N	NA	NA	NA	K09422//myb proto-oncogene protein, plant	gi|700202019|gb|KGN57152.1|//hypothetical protein Csa_3G165690 [Cucumis sativus];gi|449433427|ref|XP_004134499.1|//PREDICTED: myb-related protein 308 [Cucumis sativus]
Csa7G169070	655	110.71	0.8	-7.11256982565079	Down	MYB	Myb_DNA-binding	ARID,Response_reg,SNF2_N	GO:0043231//intracellular membrane-bounded organelle;GO:0005634//nucleus	GO:0003677//DNA binding;GO:0003676//nucleic acid binding	NA	K01184//polygalacturonase [EC:3.2.1.15];K09522//DnaJ homolog subfamily C member 2	gi|449466805|ref|XP_004151116.1|//PREDICTED: protein RADIALIS-like 1 [Cucumis sativus]
Csa7G168060	531	88.54	3.54	-4.64450810801487	Down	MYB	Myb_DNA-binding	ARID,Response_reg,SNF2_N	GO:0005634//nucleus	GO:0003677//DNA binding	NA	K01184//polygalacturonase [EC:3.2.1.15];K09522//DnaJ homolog subfamily C member 2	gi|778725452|ref|XP_011658943.1|//PREDICTED: protein RADIALIS-like 1 [Cucumis sativus]
Csa7G170600	726	28.42	1.27	-4.48400615247061	Down	MYB	Myb_DNA-binding	ARID,Response_reg,SNF2_N	GO:0005634//nucleus	GO:0003677//DNA binding;GO:0003676//nucleic acid binding	NA	K09522//DnaJ homolog subfamily C member 2;K01184//polygalacturonase [EC:3.2.1.15]	gi|778725458|ref|XP_004151125.2|//PREDICTED: protein RADIALIS-like 1 [Cucumis sativus]
Csa7G169590	3361	12.72	1.27	-3.32419826851219	Down	MYB	Myb_DNA-binding	ARID,Response_reg,SNF2_N	NA	GO:0003676//nucleic acid binding	NA	K03006//DNA-directed RNA polymerase II subunit RPB1 [EC:2.7.7.6];K01184//polygalacturonase [EC:3.2.1.15];K12447//UDP-sugar pyrophosphorylase [EC:2.7.7.64];K05658//ATP-binding cassette, subfamily B (MDR/TAP), member 1 [EC:3.6.3.44]	gi|700188845|gb|KGN44078.1|//hypothetical protein Csa_7G169590 [Cucumis sativus];gi|147768020|emb|CAN69396.1|//hypothetical protein VITISV_021034 [Vitis vinifera]
Csa7G000020	291	19.3	2.59	-2.89757684446889	Down	MYB	Myb_DNA-binding	ARID,Response_reg,SNF2_N	NA	GO:0003676//nucleic acid binding	NA	K01184//polygalacturonase [EC:3.2.1.15]	gi|449466753|ref|XP_004151090.1|//PREDICTED: protein RADIALIS-like 3 [Cucumis sativus]
Csa1G004120	1479	6.18	0.83	-2.89642359655745	Down	MYB	Myb_DNA-binding	ARID,Response_reg,SNF2_N	NA	NA	NA	K09422//myb proto-oncogene protein, plant	gi|700208450|gb|KGN63546.1|//hypothetical protein Csa_1G004120 [Cucumis sativus];gi|449440991|ref|XP_004138267.1|//PREDICTED: transcription factor MYB32-like [Cucumis sativus]
Csa3G164580	678	4.4	0.77	-2.51457317282976	Down	AP2-EREBP	AP2	-	NA	NA	NA	K09286//EREBP-like factor	gi|449432884|ref|XP_004134228.1|//PREDICTED: ethylene-responsive transcription factor RAP2-3-like [Cucumis sativus]
Csa3G882960	1720	2.69	0.54	-2.31657486039316	Down	Trihelix	trihelix	-	NA	NA	NA	K11842//ubiquitin carboxyl-terminal hydrolase 12/46 [EC:3.4.19.12];K04730//interleukin-1 receptor-associated kinase 1 [EC:2.7.11.1];K13420//LRR receptor-like serine/threonine-protein kinase FLS2 [EC:2.7.11.1]	gi|449437322|ref|XP_004136441.1|//PREDICTED: uncharacterized protein LOC101210084 [Cucumis sativus]
Csa4G003090	1234	7.18	1.45	-2.30793094380812	Down	MYB	Myb_DNA-binding	ARID,Response_reg,SNF2_N	NA	NA	NA	K09422//myb proto-oncogene protein, plant	gi|700197685|gb|KGN52843.1|//hypothetical protein Csa_4G003090 [Cucumis sativus];gi|778689398|ref|XP_004152356.2|//PREDICTED: myb-related protein P-like [Cucumis sativus]
Csa6G491000	1248	2.39	0.5	-2.25701061820602	Down	bHLH	HLH	-	NA	NA	NA	K12126//phytochrome-interacting factor 3	gi|778718426|ref|XP_004142005.2|//PREDICTED: transcription factor SPATULA [Cucumis sativus]
Csa3G122580	1003	7.77	1.68	-2.20945336562895	Down	LIM	LIM	-	NA	GO:0008270//zinc ion binding	NA	K09377//cysteine and glycine-rich protein	gi|449432173|ref|XP_004133874.1|//PREDICTED: LIM domain-containing protein PLIM2b-like [Cucumis sativus]
Csa2G367240	1498	14.54	3.22	-2.17489467580498	Down	E2F-DP	E2F_TDP	-	GO:0005634//nucleus;GO:0005667//transcription factor complex	GO:0003677//DNA binding;GO:0003700//transcription factor activity, sequence-specific DNA binding	GO:0006355//regulation of transcription, DNA-templated	K06620//transcription factor E2F3	gi|449470106|ref|XP_004152759.1|//PREDICTED: transcription factor E2FC isoform X1 [Cucumis sativus]
Csa3G895680	684	55.35	12.37	-2.16173781669255	Down	AP2-EREBP	AP2	-	NA	NA	NA	K09286//EREBP-like factor	gi|449436878|ref|XP_004136219.1|//PREDICTED: ethylene-responsive transcription factor ERF043-like [Cucumis sativus]
Csa5G527900	906	18.61	4.2	-2.14761682239303	Down	zf-HD	ZF-HD_dimer	-	NA	NA	NA	NA	gi|449450205|ref|XP_004142854.1|//PREDICTED: zinc-finger homeodomain protein 4 [Cucumis sativus]
Csa3G878800	474	23.9	6.33	-1.86699076834577	Down	bZIP	bZIP_1,bZIP_2,bZIP_Maf	HLH	GO:0043231//intracellular membrane-bounded organelle	GO:0043566//structure-specific DNA binding	GO:0009411//response to UV;GO:0010476//gibberellin mediated signaling pathway;GO:0006351//transcription, DNA-templated;GO:0009640//photomorphogenesis;GO:0031325//positive regulation of cellular metabolic process	K16241//transcription factor HY5	gi|449437128|ref|XP_004136344.1|//PREDICTED: transcription factor HY5 [Cucumis sativus]
Csa3G002970	2319	4.67	1.36	-1.77981589845932	Down	bHLH	HLH	-	NA	NA	NA	K08867//WNK lysine deficient protein kinase [EC:2.7.11.1]	gi|449456927|ref|XP_004146200.1|//PREDICTED: transcription factor bHLH157 [Cucumis sativus]
Csa3G687740	1546	46.55	14.2	-1.71289023805411	Down	Sigma70-like	Sigma70_r2,Sigma70_r3,Sigma70_r4	-	NA	GO:0003677//DNA binding;GO:0016987//sigma factor activity;GO:0003700//transcription factor activity, sequence-specific DNA binding	GO:0006355//regulation of transcription, DNA-templated;GO:0006352//DNA-templated transcription, initiation	K01872//alanyl-tRNA synthetase [EC:6.1.1.7];K03086//RNA polymerase primary sigma factor	gi|449464016|ref|XP_004149725.1|//PREDICTED: RNA polymerase sigma factor sigD, chloroplastic [Cucumis sativus]
Csa4G631590	609	23.4	7.14	-1.69014473741321	Down	SBP	SBP	-	NA	NA	NA	K13415//protein brassinosteroid insensitive 1 [EC:2.7.10.1 2.7.11.1]	gi|449456643|ref|XP_004146058.1|//PREDICTED: squamosa promoter-binding protein 1 [Cucumis sativus]
Csa5G604000	939	35.69	11.32	-1.65664594321714	Down	MYB	Myb_DNA-binding	ARID,Response_reg,SNF2_N	NA	GO:0005488//binding	NA	K08869//aarF domain-containing kinase;K17613//calcineurin-binding protein cabin-1	gi|449434861|ref|XP_004135214.1|//PREDICTED: transcription factor MYB1R1 [Cucumis sativus]
Csa2G351640	1886	47.54	15.14	-1.6507766979567	Down	HSF	HSF_DNA-bind	-	GO:0005634//nucleus	GO:0003677//DNA binding;GO:0043565//sequence-specific DNA binding;GO:0003700//transcription factor activity, sequence-specific DNA binding	GO:0006355//regulation of transcription, DNA-templated;GO:0006351//transcription, DNA-templated	K09419//heat shock transcription factor, other eukaryote	gi|778670757|ref|XP_011649528.1|//PREDICTED: heat stress transcription factor A-2 [Cucumis sativus]
Csa1G077150	802	7.9	2.29	-1.63043802914257	Down	TCP	TCP	-	NA	NA	NA	NA	gi|778658856|ref|XP_011653401.1|//PREDICTED: transcription factor PCF8-like [Cucumis sativus]
Csa2G351740	885	39.32	13.7	-1.58900418054515	Down	MYB	Myb_DNA-binding	ARID,Response_reg,SNF2_N	NA	GO:0005488//binding	NA	K08869//aarF domain-containing kinase;K17613//calcineurin-binding protein cabin-1	gi|449450578|ref|XP_004143039.1|//PREDICTED: transcription factor MYB1R1-like [Cucumis sativus]
Csa1G570740	1041	12.7	4.1	-1.55772986124958	Down	bHLH	HLH	-	NA	NA	NA	K18485//myogenic factor 6	gi|778662547|ref|XP_004135630.2|//PREDICTED: transcription factor bHLH94 [Cucumis sativus]
Csa1G587970	978	28.63	9.94	-1.52620991343707	Down	C2C2-GATA	GATA	-	NA	NA	NA	K17894	gi|449436072|ref|XP_004135818.1|//PREDICTED: putative GATA transcription factor 22 [Cucumis sativus]
Csa7G431340	1578	7.52	2.65	-1.50474030222708	Down	TUB	Tub	-	NA	NA	NA	K19600//tubby-related protein 1	gi|778728871|ref|XP_011659490.1|//PREDICTED: tubby-like protein 8 isoform X1 [Cucumis sativus];gi|449436213|ref|XP_004135888.1|//PREDICTED: tubby-like protein 8 isoform X2 [Cucumis sativus]
Csa7G047220	708	14.97	5.31	-1.49529045525426	Down	ULT	ULT	-	GO:0043231//intracellular membrane-bounded organelle	GO:0003676//nucleic acid binding	NA	NA	gi|449438068|ref|XP_004136812.1|//PREDICTED: protein ULTRAPETALA 1-like [Cucumis sativus]
Novel_G000180	1889	4.73	1.68	-1.49337895056063	Down	WRKY	WRKY	-	NA	GO:0043565//sequence-specific DNA binding;GO:0003700//transcription factor activity, sequence-specific DNA binding	GO:0006355//regulation of transcription, DNA-templated	K13424//WRKY transcription factor 33;K18834//WRKY transcription factor 1	gi|778681548|ref|XP_011651538.1|//PREDICTED: probable WRKY transcription factor 68 isoform X1 [Cucumis sativus]
Csa3G043910	2573	16.51	5.91	-1.48211008473573	Down	GRAS	GRAS	-	GO:0005634//nucleus	GO:0043565//sequence-specific DNA binding;GO:0003700//transcription factor activity, sequence-specific DNA binding	GO:0006355//regulation of transcription, DNA-templated	K14494//DELLA protein	gi|778675691|ref|XP_004148280.2|//PREDICTED: scarecrow-like protein 28 [Cucumis sativus]
Csa6G516850	1096	11.85	4.32	-1.45578384162215	Down	MYB	Myb_DNA-binding	ARID,Response_reg,SNF2_N	NA	NA	NA	K09422//myb proto-oncogene protein, plant	gi|700193973|gb|KGN49177.1|//hypothetical protein Csa_6G516850 [Cucumis sativus];gi|449434358|ref|XP_004134963.1|//PREDICTED: myb-related protein 315-like [Cucumis sativus]
Csa2G402090	1181	57.49	21.99	-1.38646342655854	Down	mTERF	mTERF	-	GO:0005739//mitochondrion;GO:0009507//chloroplast	GO:0003690//double-stranded DNA binding	GO:0006355//regulation of transcription, DNA-templated	NA	gi|778672961|ref|XP_011649898.1|//PREDICTED: uncharacterized protein LOC101218603 isoform X1 [Cucumis sativus]
Csa4G038690	1770	9.22	3.53	-1.38509856715816	Down	GRAS	GRAS	-	NA	NA	NA	K14494//DELLA protein	gi|449462860|ref|XP_004149153.1|//PREDICTED: scarecrow-like protein 4 [Cucumis sativus]
Csa6G489970	1227	14.1	5.37	-1.38346296244541	Down	ABI3VP1	B3	AP2,Auxin_resp	NA	NA	NA	K14328//regulator of nonsense transcripts 3;K09287//RAV-like factor	gi|778718250|ref|XP_011657840.1|//PREDICTED: B3 domain-containing transcription factor VRN1-like [Cucumis sativus]
Csa7G387720	2266	19.89	7.76	-1.35791471864662	Down	HSF	HSF_DNA-bind	-	NA	GO:0003677//DNA binding	GO:0006351//transcription, DNA-templated	K09419//heat shock transcription factor, other eukaryote	gi|778727619|ref|XP_011659289.1|//PREDICTED: heat stress transcription factor A-6b-like isoform X1 [Cucumis sativus];gi|700189555|gb|KGN44788.1|//hypothetical protein Csa_7G387720 [Cucumis sativus]
Csa3G238150	678	11.29	4.42	-1.35292721138157	Down	C2C2-Dof	zf-Dof	-	NA	NA	NA	K16222//Dof zinc finger protein DOF5.5	gi|449457069|ref|XP_004146271.1|//PREDICTED: dof zinc finger protein DOF1.8-like [Cucumis sativus]
Csa4G015740	831	8.55	3.41	-1.32615268074909	Down	FAR1	FAR1	-	NA	NA	GO:0006355//regulation of transcription, DNA-templated	K17604//zinc finger SWIM domain-containing protein 3	gi|449468782|ref|XP_004152100.1|//PREDICTED: protein FAR1-RELATED SEQUENCE 5 [Cucumis sativus]
Csa3G122510	1775	15.54	6.32	-1.29799004023061	Down	MYB	Myb_DNA-binding	ARID,Response_reg,SNF2_N	NA	GO:0003677//DNA binding	GO:0009909//regulation of flower development	K09422//myb proto-oncogene protein, plant	gi|659077729|ref|XP_008439352.1|//PREDICTED: transcription factor MYB34-like [Cucumis melo];gi|449432165|ref|XP_004133870.1|//PREDICTED: transcription repressor MYB6 [Cucumis sativus];gi|700201394|gb|KGN56527.1|//hypothetical protein Csa_3G122510 [Cucumis sativus]
Csa1G145960	1411	71.2	29.43	-1.27458969891337	Down	C3H	zf-CCCH	PHD,SNF2_N,zf-C2H2	GO:0089701//U2AF	GO:0003723//RNA binding;GO:0046872//metal ion binding;GO:0000166//nucleotide binding;GO:0003676//nucleic acid binding	GO:0000398//mRNA splicing, via spliceosome	K12836//splicing factor U2AF 35 kDa subunit	gi|449443402|ref|XP_004139466.1|//PREDICTED: splicing factor U2af small subunit B-like [Cucumis sativus]
Csa4G628890	1017	6.56	2.72	-1.27008916336774	Down	bZIP	bZIP_1,bZIP_2,bZIP_Maf	HLH	NA	NA	NA	NA	gi|778695798|ref|XP_004146037.2|//PREDICTED: basic leucine zipper 34 [Cucumis sativus]
Csa2G030020	2822	5.33	2.22	-1.26357585640907	Down	MYB	Myb_DNA-binding	ARID,Response_reg,SNF2_N	NA	NA	NA	NA	gi|778666893|ref|XP_011648836.1|//PREDICTED: protein ALWAYS EARLY 3-like isoform X3 [Cucumis sativus]
Csa2G249260	480	36.54	15.31	-1.2550023511277	Down	bZIP	bZIP_1,bZIP_2,bZIP_Maf	HLH	NA	GO:0003677//DNA binding	GO:0006351//transcription, DNA-templated	K09060//plant G-box-binding factor	gi|778669403|ref|XP_011649241.1|//PREDICTED: ocs element-binding factor 1-like [Cucumis sativus]
Csa7G154490	1566	26.52	11.23	-1.23972284771199	Down	mTERF	mTERF	-	NA	NA	NA	K15032//mTERF domain-containing protein, mitochondrial	gi|449467351|ref|XP_004151387.1|//PREDICTED: uncharacterized protein LOC101207692 [Cucumis sativus]
Csa1G616330	1287	17.38	7.52	-1.20862351513676	Down	GRAS	GRAS	-	NA	NA	NA	K14494//DELLA protein	gi|700211419|gb|KGN66515.1|//hypothetical protein Csa_1G616330 [Cucumis sativus]
Csa5G092930	1200	8.1	3.53	-1.19825372450081	Down	C2H2	zf-C2H2	PHD	NA	GO:0005488//binding	NA	K12309//beta-galactosidase [EC:3.2.1.23]	gi|778698389|ref|XP_004150157.2|//PREDICTED: protein SHOOT GRAVITROPISM 5 [Cucumis sativus]
Csa5G622830	1527	87.04	38.03	-1.19454061761975	Down	C2C2-GATA	GATA	-	GO:0005634//nucleus	GO:0043565//sequence-specific DNA binding;GO:0008270//zinc ion binding;GO:0005488//binding;GO:0003700//transcription factor activity, sequence-specific DNA binding	GO:0045893//positive regulation of transcription, DNA-templated	K19027//zinc finger FYVE domain-containing protein 26;K17895//GATA-binding protein 3;K17894	gi|449449346|ref|XP_004142426.1|//PREDICTED: GATA transcription factor 8 [Cucumis sativus]
Csa1G586860	1856	22.4	9.67	-1.18853642909432	Down	MYB	Myb_DNA-binding	ARID,Response_reg,SNF2_N	NA	NA	NA	K08869//aarF domain-containing kinase;K07574//RNA-binding protein;K17613//calcineurin-binding protein cabin-1	gi|700211128|gb|KGN66224.1|//hypothetical protein Csa_1G586860 [Cucumis sativus];gi|778662917|ref|XP_011659976.1|//PREDICTED: putative uncharacterized protein DDB_G0277255 [Cucumis sativus]
Csa2G361700	963	21.9	9.71	-1.17338766906934	Down	zf-HD	ZF-HD_dimer	-	NA	NA	NA	NA	gi|778671364|ref|XP_011649626.1|//PREDICTED: zinc-finger homeodomain protein 5 [Cucumis sativus]
Csa3G182040	1244	22.21	9.89	-1.16716696678787	Down	MYB	Myb_DNA-binding	ARID,Response_reg,SNF2_N	NA	NA	NA	K09422//myb proto-oncogene protein, plant	gi|700202235|gb|KGN57368.1|//hypothetical protein Csa_3G182040 [Cucumis sativus]
Csa6G108570	1669	79.13	35.37	-1.16169853818525	Down	bHLH	HLH	-	GO:0016021//integral component of membrane	GO:0046983//protein dimerization activity	NA	K16189//phytochrome-interacting factor 4;K12126//phytochrome-interacting factor 3	gi|778712228|ref|XP_011656866.1|//PREDICTED: transcription factor UNE10 [Cucumis sativus]
Csa3G843820	873	31.3	14	-1.16073582998765	Down	C2C2-GATA	GATA	-	NA	NA	NA	K17894	gi|449446764|ref|XP_004141141.1|//PREDICTED: GATA transcription factor 9-like [Cucumis sativus]
Csa1G070590	1080	6.97	3.13	-1.1549959989358	Down	bHLH	HLH	-	NA	NA	NA	K05765//cofilin	gi|778658567|ref|XP_011652899.1|//PREDICTED: uncharacterized protein LOC105435148 isoform X1 [Cucumis sativus]
Csa1G051590	1784	27.19	12.55	-1.11538878718663	Down	SBP	SBP	-	GO:0005634//nucleus	GO:0003677//DNA binding	NA	K13415//protein brassinosteroid insensitive 1 [EC:2.7.10.1 2.7.11.1]	gi|778658165|ref|XP_011652208.1|//PREDICTED: squamosa promoter-binding-like protein 13A [Cucumis sativus]
Csa3G889150	3745	15.75	7.31	-1.1074085173222	Down	MYB	Myb_DNA-binding	ARID,Response_reg,SNF2_N	NA	GO:0003677//DNA binding	NA	K09420//myb proto-oncogene protein	gi|778687344|ref|XP_011652549.1|//PREDICTED: myb-related protein 3R-1 [Cucumis sativus]
Csa6G525490	3275	31.83	14.93	-1.09217299150138	Down	FAR1	FAR1	-	NA	NA	NA	K14760//acyl-activating enzyme 14 [EC:6.2.1.26]	gi|449433565|ref|XP_004134568.1|//PREDICTED: 2-succinylbenzoate--CoA ligase, chloroplastic/peroxisomal isoform X2 [Cucumis sativus];gi|700194259|gb|KGN49463.1|//hypothetical protein Csa_6G525490 [Cucumis sativus];gi|778721580|ref|XP_011658323.1|//PREDICTED: 2-succinylbenzoate--CoA ligase, chloroplastic/peroxisomal isoform X1 [Cucumis sativus]
Csa1G043040	534	52.84	24.85	-1.08838461479718	Down	zf-HD	ZF-HD_dimer	-	NA	NA	NA	NA	gi|449439493|ref|XP_004137520.1|//PREDICTED: zinc-finger homeodomain protein 9-like [Cucumis sativus]
Csa1G690370	1857	31.7	14.67	-1.08265337044845	Down	MYB	Myb_DNA-binding	ARID,Response_reg,SNF2_N	NA	NA	NA	NA	gi|449449541|ref|XP_004142523.1|//PREDICTED: trihelix transcription factor GTL2 [Cucumis sativus]
Csa6G513430	1056	8.8	4.16	-1.08091999538357	Down	HB	Homeobox,KNOX1,KNOX2	-	GO:0043231//intracellular membrane-bounded organelle	GO:0003677//DNA binding;GO:0001071//nucleic acid binding transcription factor activity	GO:0006351//transcription, DNA-templated	K16670//homeobox protein Meis2;K15613//homeobox protein Meis1	gi|778720257|ref|XP_004134981.2|//PREDICTED: homeobox protein knotted-1-like LET6 [Cucumis sativus]
Csa3G117960	1412	28.15	13.33	-1.07845814187862	Down	SBP	SBP	-	GO:0005634//nucleus	GO:0003677//DNA binding	NA	K13415//protein brassinosteroid insensitive 1 [EC:2.7.10.1 2.7.11.1]	gi|449431972|ref|XP_004133774.1|//PREDICTED: squamosa promoter-binding-like protein 7 isoform X1 [Cucumis sativus]
Csa7G452370	2332	21.35	10.17	-1.06991639065035	Down	MYB	Myb_DNA-binding	ARID,Response_reg,SNF2_N	GO:0005634//nucleus	GO:0003677//DNA binding;GO:0060089//molecular transducer activity;GO:0016628//oxidoreductase activity, acting on the CH-CH group of donors, NAD or NADP as acceptor	GO:0007165//signal transduction;GO:0008152//metabolic process;GO:0006355//regulation of transcription, DNA-templated	K14490//histidine-containing phosphotransfer peotein	gi|449447821|ref|XP_004141666.1|//PREDICTED: histidine-containing phosphotransfer protein 4 [Cucumis sativus];gi|449447817|ref|XP_004141664.1|//PREDICTED: uncharacterized protein LOC101214316 [Cucumis sativus]
Csa6G403070	897	16.83	8.7	-1.06039459805217	Down	bHLH	HLH	-	NA	NA	NA	K16189//phytochrome-interacting factor 4;K11253//histone H3;K12126//phytochrome-interacting factor 3	gi|449458041|ref|XP_004146756.1|//PREDICTED: transcription factor bHLH79 [Cucumis sativus]
Csa3G354500	2230	83.28	40.44	-1.0421870713964	Down	Sigma70-like	Sigma70_r2,Sigma70_r3,Sigma70_r4	-	GO:0043231//intracellular membrane-bounded organelle;GO:0044444//cytoplasmic part	GO:0003677//DNA binding;GO:0003700//transcription factor activity, sequence-specific DNA binding;GO:0016987//sigma factor activity	GO:0016043//cellular component organization;GO:0006355//regulation of transcription, DNA-templated;GO:0006351//transcription, DNA-templated;GO:0006352//DNA-templated transcription, initiation	K03093//RNA polymerase sigma factor	gi|778680888|ref|XP_011651413.1|//PREDICTED: RNA polymerase sigma factor sigE, chloroplastic/mitochondrial [Cucumis sativus]
Csa1G065960	708	45.82	22.72	-1.01201462379999	Down	bHLH	HLH	-	NA	NA	NA	K13422//transcription factor MYC2	gi|449454698|ref|XP_004145091.1|//PREDICTED: transcription factor ILR3-like [Cucumis sativus]
Csa6G454440	1393	23.91	11.89	-1.00786541496597	Down	mTERF	mTERF	-	NA	NA	NA	K15032//mTERF domain-containing protein, mitochondrial;K06620//transcription factor E2F3	gi|700193092|gb|KGN48296.1|//hypothetical protein Csa_6G454440 [Cucumis sativus];gi|778717628|ref|XP_011657727.1|//PREDICTED: transcription factor E2FA-like isoform X3 [Cucumis sativus]

## Sheet: Gy14_3 dpi
GeneID	Length	Gy14_0-Expression	Gy14_3-Expression	log2FoldChange(Gy14_3/Gy14_0)	Up/Down-Regulation	TF_family	Included_domain	Excluded_domain	Cellular Component	Molecular Function	Biological Process	Kegg Orthology	Nr Description
Csa3G207390	825	0.01	45.9	12.1642784383012	Up	AP2-EREBP	AP2	-	NA	NA	NA	K09286//EREBP-like factor	gi|449446085|ref|XP_004140802.1|//PREDICTED: ethylene-responsive transcription factor ERF109 [Cucumis sativus]
Csa3G822450	759	0.01	13.43	10.3912435894274	Up	HSF	HSF_DNA-bind	-	NA	NA	NA	K09419//heat shock transcription factor, other eukaryote	gi|449438018|ref|XP_004136787.1|//PREDICTED: heat stress transcription factor B-3-like [Cucumis sativus]
Csa1G088450	498	0.01	12.53	10.2911706993219	Up	LOB	DUF260	-	NA	NA	NA	K13944;K01227//mannosyl-glycoprotein endo-beta-N-acetylglucosaminidase [EC:3.2.1.96];K14491//two-component response regulator ARR-B family	gi|700209659|gb|KGN64755.1|//hypothetical protein Csa_1G088450 [Cucumis sativus]
Csa5G155570	678	0.01	9.67	9.91737207947684	Up	AP2-EREBP	AP2	-	NA	NA	NA	K09286//EREBP-like factor	gi|449452372|ref|XP_004143933.1|//PREDICTED: dehydration-responsive element-binding protein 1E [Cucumis sativus]
Csa2G174670	1371	0.12	45.84	8.57742882803575	Up	MYB	Myb_DNA-binding	ARID,Response_reg,SNF2_N	GO:0043231//intracellular membrane-bounded organelle	GO:0001071//nucleic acid binding transcription factor activity;GO:0003676//nucleic acid binding	GO:0009743//response to carbohydrate;GO:0006970//response to osmotic stress;GO:0009725//response to hormone;GO:0006351//transcription, DNA-templated;GO:0010038//response to metal ion	K09422//myb proto-oncogene protein, plant	gi|700206482|gb|KGN61601.1|//hypothetical protein Csa_2G174670 [Cucumis sativus];gi|449458822|ref|XP_004147145.1|//PREDICTED: myb-related protein Myb4-like [Cucumis sativus]
Csa5G174570	603	0.01	3.37	8.39660478118186	Up	AP2-EREBP	AP2	-	NA	NA	GO:0006351//transcription, DNA-templated	K09286//EREBP-like factor	gi|449451912|ref|XP_004143704.1|//PREDICTED: dehydration-responsive element-binding protein 1B-like [Cucumis sativus]
Csa5G466880	1575	0.01	2.87	8.16490692667569	Up	mTERF	mTERF	-	NA	NA	NA	K15032//mTERF domain-containing protein, mitochondrial	gi|449452140|ref|XP_004143818.1|//PREDICTED: uncharacterized protein LOC101216006 [Cucumis sativus]
Csa4G645310	1201	0.01	2.78	8.11894107272351	Up	MYB	Myb_DNA-binding	ARID,Response_reg,SNF2_N	NA	GO:0003677//DNA binding	NA	K09422//myb proto-oncogene protein, plant	gi|449447315|ref|XP_004141414.1|//PREDICTED: transcription factor RAX1-like [Cucumis sativus];gi|700200147|gb|KGN55305.1|//hypothetical protein Csa_4G645310 [Cucumis sativus]
Csa6G139770	921	0.01	2.69	8.07146236255663	Up	WRKY	WRKY	-	NA	NA	NA	K18835//WRKY transcription factor 2;K13424//WRKY transcription factor 33	gi|778713152|ref|XP_011656990.1|//PREDICTED: probable WRKY transcription factor 12 [Cucumis sativus]
Csa7G045590	765	0.01	2.59	8.01680828768655	Up	MYB	Myb_DNA-binding	ARID,Response_reg,SNF2_N	NA	NA	NA	K09422//myb proto-oncogene protein, plant	gi|449453652|ref|XP_004144570.1|//PREDICTED: transcription factor WER-like [Cucumis sativus]
Csa1G023580	1041	0.01	2.49	7.96000193206808	Up	NAC	NAM	-	NA	GO:0003676//nucleic acid binding	NA	K13126//polyadenylate-binding protein;K05941//glutathione gamma-glutamylcysteinyltransferase [EC:2.3.2.15]	gi|449440943|ref|XP_004138243.1|//PREDICTED: protein CUP-SHAPED COTYLEDON 1 [Cucumis sativus]
Csa1G024160	1193	0.17	40.56	7.898379095753	Up	MYB	Myb_DNA-binding	ARID,Response_reg,SNF2_N	NA	NA	NA	K09422//myb proto-oncogene protein, plant	gi|700208734|gb|KGN63830.1|//hypothetical protein Csa_1G024160 [Cucumis sativus];gi|449439539|ref|XP_004137543.1|//PREDICTED: myb-related protein 305-like [Cucumis sativus]
Csa6G497110	990	0.01	2.23	7.8008998999203	Up	bHLH	HLH	-	NA	NA	NA	K13422//transcription factor MYC2	gi|449451351|ref|XP_004143425.1|//PREDICTED: transcription factor bHLH18-like [Cucumis sativus]
Csa2G439230	1192	0.01	2.5	7.67948009950545	Up	MYB	Myb_DNA-binding	ARID,Response_reg,SNF2_N	NA	NA	NA	K09422//myb proto-oncogene protein, plant	gi|700208296|gb|KGN63415.1|//hypothetical protein Csa_2G439230 [Cucumis sativus]
Csa4G608170	1352	0.11	17.45	7.30957970245972	Up	NAC	NAM	-	NA	NA	NA	K12581//CCR4-NOT transcription complex subunit 7/8;K02437//glycine cleavage system H protein;K00162//pyruvate dehydrogenase E1 component beta subunit [EC:1.2.4.1];K13126//polyadenylate-binding protein;K01054//acylglycerol lipase [EC:3.1.1.23]	gi|449453868|ref|XP_004144678.1|//PREDICTED: transcription factor JUNGBRUNNEN 1 [Cucumis sativus];gi|700199783|gb|KGN54941.1|//hypothetical protein Csa_4G608170 [Cucumis sativus]
Csa4G012390	648	0.6	88.96	7.21205047711499	Up	WRKY	WRKY	-	NA	NA	NA	K18835//WRKY transcription factor 2;K13424//WRKY transcription factor 33	gi|778689952|ref|XP_004152302.2|//PREDICTED: probable WRKY transcription factor 75 [Cucumis sativus]
Csa1G042350	1276	1.7	158.29	7.20881550897645	Up	MYB	Myb_DNA-binding	ARID,Response_reg,SNF2_N	NA	NA	NA	K09422//myb proto-oncogene protein, plant	gi|700209027|gb|KGN64123.1|//hypothetical protein Csa_1G042350 [Cucumis sativus];gi|449439407|ref|XP_004137477.1|//PREDICTED: transcription factor MYB108-like [Cucumis sativus]
Csa3G180260	642	0.61	62.64	6.68213115972815	Up	AP2-EREBP	AP2	-	NA	NA	NA	K09286//EREBP-like factor	gi|449446069|ref|XP_004140794.1|//PREDICTED: dehydration-responsive element-binding protein 1A [Cucumis sativus]
Csa6G425720	594	0.22	18.4	6.35755200461808	Up	NAC	NAM	-	NA	NA	NA	K13126//polyadenylate-binding protein	gi|449444999|ref|XP_004140261.1|//PREDICTED: NAC domain-containing protein 90 [Cucumis sativus]
Csa2G177210	687	0.75	57.37	6.25726211215609	Up	AP2-EREBP	AP2	-	NA	NA	NA	K14516//ethylene-responsive transcription factor 1	gi|449466538|ref|XP_004150983.1|//PREDICTED: ethylene-responsive transcription factor 1B-like [Cucumis sativus]
Csa2G406060	399	1.4	72.26	6.11854182129135	Up	WRKY	WRKY	-	NA	GO:0003677//DNA binding;GO:0001071//nucleic acid binding transcription factor activity	GO:0010467//gene expression	K18835//WRKY transcription factor 2;K13424//WRKY transcription factor 33	gi|778673213|ref|XP_004138624.2|//PREDICTED: probable WRKY transcription factor 45 [Cucumis sativus]
Csa1G597730	612	0.64	43.07	6.07246760824186	Up	AP2-EREBP	AP2	-	NA	NA	NA	K09286//EREBP-like factor	gi|449452608|ref|XP_004144051.1|//PREDICTED: ethylene-responsive transcription factor ERF017 [Cucumis sativus]
Csa1G481720	468	0.29	14.94	5.68698343766167	Up	C2H2	zf-C2H2	PHD	NA	NA	NA	K14841//ribosome biogenesis protein NSA1	gi|700210574|gb|KGN65670.1|//hypothetical protein Csa_1G481720 [Cucumis sativus]
Csa6G517310	594	0.22	10.96	5.63860046432323	Up	HSF	HSF_DNA-bind	-	NA	NA	NA	K09419//heat shock transcription factor, other eukaryote	gi|778720797|ref|XP_011658207.1|//PREDICTED: heat stress transcription factor B-2a-like [Cucumis sativus]
Csa3G386830	1323	0.09	3.86	5.42253203582577	Up	MYB	Myb_DNA-binding	ARID,Response_reg,SNF2_N	GO:0043231//intracellular membrane-bounded organelle	GO:0003676//nucleic acid binding	NA	K09422//myb proto-oncogene protein, plant	gi|449468552|ref|XP_004151985.1|//PREDICTED: myb-related protein Myb4-like [Cucumis sativus];gi|700202777|gb|KGN57910.1|//hypothetical protein Csa_3G386830 [Cucumis sativus]
Csa7G073700	771	0.17	5.66	5.05719540158154	Up	AP2-EREBP	AP2	-	NA	NA	NA	K09286//EREBP-like factor	gi|778725119|ref|XP_004137113.2|//PREDICTED: ethylene-responsive transcription factor ERF109-like [Cucumis sativus]
Csa6G055940	1215	0.31	9.92	5	Up	AP2-EREBP	AP2	-	NA	NA	NA	K09286//EREBP-like factor	gi|449446496|ref|XP_004141007.1|//PREDICTED: ethylene-responsive transcription factor ABR1-like [Cucumis sativus]
Csa6G518170	693	0.56	17.91	4.99919469992836	Up	NAC	NAM	-	GO:0043231//intracellular membrane-bounded organelle	GO:0001071//nucleic acid binding transcription factor activity	NA	NA	gi|778720964|ref|XP_004134944.2|//PREDICTED: NAC domain-containing protein 8-like [Cucumis sativus]
Csa1G589140	1739	0.38	10.6	4.80192103600698	Up	bHLH	HLH	-	NA	NA	NA	K13422//transcription factor MYC2	gi|778663004|ref|XP_011659992.1|//PREDICTED: putative transcription factor bHLH041 isoform X1 [Cucumis sativus];gi|700211160|gb|KGN66256.1|//hypothetical protein Csa_1G589140 [Cucumis sativus];gi|778663007|ref|XP_011659993.1|//PREDICTED: putative transcription factor bHLH041 isoform X2 [Cucumis sativus]
Csa2G000420	1444	0.27	7.22	4.7409675247237	Up	bHLH	HLH	-	NA	NA	NA	K13422//transcription factor MYC2	gi|700205415|gb|KGN60534.1|//hypothetical protein Csa_2G000420 [Cucumis sativus];gi|659071355|ref|XP_008459381.1|//PREDICTED: putative transcription factor bHLH041 isoform X1 [Cucumis melo]
Csa3G710870	928	2.53	67.54	4.73853288931317	Up	WRKY	WRKY	-	NA	GO:0003677//DNA binding;GO:0001071//nucleic acid binding transcription factor activity	GO:0010467//gene expression	K18835//WRKY transcription factor 2;K13424//WRKY transcription factor 33;K18834//WRKY transcription factor 1	gi|700203527|gb|KGN58660.1|//hypothetical protein Csa_3G710870 [Cucumis sativus]
Csa4G051470	1806	0.95	23.59	4.63410409490851	Up	WRKY	WRKY	-	NA	GO:0043565//sequence-specific DNA binding;GO:0003700//transcription factor activity, sequence-specific DNA binding	GO:0006355//regulation of transcription, DNA-templated	K18835//WRKY transcription factor 2;K13426//WRKY transcription factor 29;K13425//WRKY transcription factor 22;K16225//probable WRKY transcription factor 52	gi|449464068|ref|XP_004149751.1|//PREDICTED: probable WRKY transcription factor 41 [Cucumis sativus]
Csa4G641590	450	1.51	33.76	4.48269444938211	Up	AP2-EREBP	AP2	-	GO:0043231//intracellular membrane-bounded organelle	GO:0001071//nucleic acid binding transcription factor activity;GO:0003676//nucleic acid binding	GO:0006351//transcription, DNA-templated	K09286//EREBP-like factor	gi|449447039|ref|XP_004141277.1|//PREDICTED: ethylene-responsive transcription factor ERF011-like [Cucumis sativus]
Csa4G614170	711	0.91	19.1	4.39156228272441	Up	G2-like	G2-like	Response_reg	NA	NA	NA	K12741//heterogeneous nuclear ribonucleoprotein A1/A3;K14491//two-component response regulator ARR-B family;K14317//nuclear pore complex protein Nup214	gi|778695370|ref|XP_011653983.1|//PREDICTED: uncharacterized protein LOC105435279 [Cucumis sativus]
Novel_G000368	1125	0.11	2.29	4.37977216945965	Up	MYB	Myb_DNA-binding	ARID,Response_reg,SNF2_N	NA	NA	NA	K09422//myb proto-oncogene protein, plant	gi|778713300|ref|XP_011657019.1|//PREDICTED: transcription factor RAX1-like [Cucumis sativus]
Csa6G169310	903	0.14	2.89	4.36757076044307	Up	HSF	HSF_DNA-bind	-	NA	GO:0003677//DNA binding	GO:0006351//transcription, DNA-templated	K09419//heat shock transcription factor, other eukaryote	gi|449450958|ref|XP_004143229.1|//PREDICTED: heat stress transcription factor A-4d [Cucumis sativus]
Csa3G731130	924	0.96	18.6	4.2336196767597	Up	Trihelix	trihelix	-	NA	NA	NA	NA	gi|778683209|ref|XP_004137715.2|//PREDICTED: trihelix transcription factor GT-3b [Cucumis sativus]
Csa6G486960	925	40.28	720.72	4.16130329227152	Up	FAR1	FAR1	-	NA	GO:0043565//sequence-specific DNA binding;GO:0003700//transcription factor activity, sequence-specific DNA binding	GO:0006355//regulation of transcription, DNA-templated	K18835//WRKY transcription factor 2;K13424//WRKY transcription factor 33	gi|449448420|ref|XP_004141964.1|//PREDICTED: probable WRKY transcription factor 51 [Cucumis sativus]
Csa1G088440	552	0.48	7.93	4.04621455498282	Up	LOB	DUF260	-	NA	NA	NA	K13944;K01227//mannosyl-glycoprotein endo-beta-N-acetylglucosaminidase [EC:3.2.1.96]	gi|449459128|ref|XP_004147298.1|//PREDICTED: LOB domain-containing protein 1-like [Cucumis sativus]
Csa3G119700	1014	16.26	256.74	3.98090892226962	Up	WRKY	WRKY	-	NA	NA	NA	K13425//WRKY transcription factor 22;K16225//probable WRKY transcription factor 52	gi|778676947|ref|XP_011650695.1|//PREDICTED: probable WRKY transcription factor 46 [Cucumis sativus]
Csa7G071440	762	2.53	38.38	3.92314542150107	Up	C2H2	zf-C2H2	PHD	NA	NA	NA	NA	gi|449438625|ref|XP_004137088.1|//PREDICTED: zinc finger protein ZAT10 [Cucumis sativus]
Csa2G354820	693	9.16	132.14	3.85057584128033	Up	C2H2	zf-C2H2	PHD	NA	NA	NA	NA	gi|700207337|gb|KGN62456.1|//hypothetical protein Csa_2G354820 [Cucumis sativus]
Csa3G567330	513	3.39	46.83	3.78807585956272	Up	WRKY	WRKY	-	NA	GO:0003677//DNA binding;GO:0001071//nucleic acid binding transcription factor activity	GO:0010467//gene expression	K18835//WRKY transcription factor 2;K13424//WRKY transcription factor 33	gi|659098396|ref|XP_008450119.1|//PREDICTED: probable WRKY transcription factor 75 [Cucumis melo]
Csa1G075060	636	3.9	49.96	3.67922744785835	Up	AP2-EREBP	AP2	-	NA	NA	NA	K09286//EREBP-like factor	gi|449457841|ref|XP_004146656.1|//PREDICTED: ethylene-responsive transcription factor 11 [Cucumis sativus]
Csa1G009580	1989	0.53	6.7	3.66009683078194	Up	WRKY	WRKY	-	NA	GO:0043565//sequence-specific DNA binding;GO:0003700//transcription factor activity, sequence-specific DNA binding	GO:0006355//regulation of transcription, DNA-templated	K18835//WRKY transcription factor 2;K13424//WRKY transcription factor 33;K01892//histidyl-tRNA synthetase [EC:6.1.1.21];K18834//WRKY transcription factor 1	gi|778655906|ref|XP_011660002.1|//PREDICTED: probable WRKY transcription factor 61 isoform X2 [Cucumis sativus];gi|778655903|ref|XP_011659995.1|//PREDICTED: probable WRKY transcription factor 61 isoform X1 [Cucumis sativus]
Csa7G020910	852	1.67	20.77	3.6365812083706	Up	NAC	NAM	-	NA	NA	NA	K13126//polyadenylate-binding protein	gi|449454271|ref|XP_004144879.1|//PREDICTED: protein FEZ-like [Cucumis sativus]
Csa5G165850	753	1.54	19	3.62499716252341	Up	AP2-EREBP	AP2	-	NA	NA	NA	K09286//EREBP-like factor	gi|449469359|ref|XP_004152388.1|//PREDICTED: ethylene-responsive transcription factor 1A-like [Cucumis sativus]
Csa2G382540	528	1.1	12.24	3.59917635994086	Up	AP2-EREBP	AP2	-	NA	NA	GO:0050794//regulation of cellular process;GO:0010467//gene expression	K09286//EREBP-like factor	gi|449441876|ref|XP_004138708.1|//PREDICTED: ethylene-responsive transcription factor ERF003-like [Cucumis sativus]
Csa6G363560	462	2.64	30.33	3.52213566326572	Up	FAR1	FAR1	-	NA	NA	NA	K13424//WRKY transcription factor 33	gi|449453049|ref|XP_004144271.1|//PREDICTED: probable WRKY transcription factor 50 isoform X1 [Cucumis sativus]
Csa6G040640	861	3.84	43.84	3.51306958223937	Up	MYB	Myb_DNA-binding	ARID,Response_reg,SNF2_N	NA	NA	NA	K09422//myb proto-oncogene protein, plant	gi|778710158|ref|XP_004140978.2|//PREDICTED: transcription factor MYB108-like [Cucumis sativus]
Csa7G413890	831	2.3	24.51	3.41366471792246	Up	MYB	Myb_DNA-binding	ARID,Response_reg,SNF2_N	NA	NA	NA	K09422//myb proto-oncogene protein, plant	gi|778728329|ref|XP_004136147.2|//PREDICTED: transcription factor MYB108-like [Cucumis sativus]
Csa5G223070	849	29.25	307.82	3.39557844117984	Up	WRKY	WRKY	-	NA	GO:0003677//DNA binding;GO:0001071//nucleic acid binding transcription factor activity	GO:0010467//gene expression	K18835//WRKY transcription factor 2;K16225//probable WRKY transcription factor 52	gi|700195571|gb|KGN50748.1|//hypothetical protein Csa_5G223070 [Cucumis sativus]
Csa7G049230	630	19.29	201.29	3.38335045307522	Up	AP2-EREBP	AP2	-	NA	NA	NA	K09286//EREBP-like factor	gi|449438123|ref|XP_004136839.1|//PREDICTED: ethylene-responsive transcription factor 4-like [Cucumis sativus]
Csa6G513530	1656	6.61	68.51	3.37359240827062	Up	WRKY	WRKY	-	NA	NA	NA	K10268//F-box and leucine-rich repeat protein 2/20;K13424//WRKY transcription factor 33	gi|700193885|gb|KGN49089.1|//hypothetical protein Csa_6G513530 [Cucumis sativus];gi|449433982|ref|XP_004134775.1|//PREDICTED: probable WRKY transcription factor 31 [Cucumis sativus]
Csa4G630010	582	15.17	156.49	3.36677747852834	Up	AP2-EREBP	AP2	-	NA	NA	NA	K09286//EREBP-like factor	gi|449456627|ref|XP_004146050.1|//PREDICTED: ethylene-responsive transcription factor 4 [Cucumis sativus]
Novel_G000104	1047	1.32	12.97	3.29656864489325	Up	MYB	Myb_DNA-binding	ARID,Response_reg,SNF2_N	NA	NA	NA	K09422//myb proto-oncogene protein, plant	gi|778670368|ref|XP_004147356.2|//PREDICTED: myb-related protein 330-like [Cucumis sativus]
Csa3G727990	990	65.44	642.74	3.29599060582822	Up	WRKY	WRKY	-	NA	GO:0003677//DNA binding;GO:0001071//nucleic acid binding transcription factor activity	GO:0010467//gene expression	K18835//WRKY transcription factor 2;K13424//WRKY transcription factor 33;K16225//probable WRKY transcription factor 52	gi|700203548|gb|KGN58681.1|//WRKY transcription factor [Cucumis sativus]
Csa6G091830	954	10.37	101.17	3.28629375096963	Up	AP2-EREBP	AP2	-	NA	NA	NA	K09286//EREBP-like factor	gi|700191206|gb|KGN46410.1|//hypothetical protein Csa_6G091830 [Cucumis sativus];gi|778722055|ref|XP_011658395.1|//PREDICTED: ethylene-responsive transcription factor ERF113 [Cucumis sativus]
Csa2G382650	1083	13.51	131.74	3.28559387546046	Up	WRKY	WRKY	-	NA	GO:0003677//DNA binding;GO:0043565//sequence-specific DNA binding;GO:0003700//transcription factor activity, sequence-specific DNA binding;GO:0001071//nucleic acid binding transcription factor activity	GO:0010467//gene expression;GO:0006355//regulation of transcription, DNA-templated	K18835//WRKY transcription factor 2;K10268//F-box and leucine-rich repeat protein 2/20;K18834//WRKY transcription factor 1	gi|700207873|gb|KGN62992.1|//hypothetical protein Csa_2G382650 [Cucumis sativus];gi|525506965|ref|NP_001267528.1|//probable WRKY transcription factor 40-like [Cucumis sativus]
Csa6G518290	534	4.24	40.9	3.26996467326591	Up	AP2-EREBP	AP2	-	NA	NA	NA	K09286//EREBP-like factor;K13433//pathogenesis-related genes transcriptional activator PTI5;K14516//ethylene-responsive transcription factor 1	gi|778721013|ref|XP_004134941.2|//PREDICTED: pathogenesis-related genes transcriptional activator PTI5-like [Cucumis sativus]
Csa5G608390	1071	0.94	8.32	3.14585086646346	Up	G2-like	G2-like	Response_reg	NA	NA	NA	K14491//two-component response regulator ARR-B family	gi|449434656|ref|XP_004135112.1|//PREDICTED: uncharacterized protein LOC101203539 [Cucumis sativus]
Csa3G018320	1035	6.68	59.02	3.14328391295795	Up	AP2-EREBP	AP2	-	NA	NA	NA	K09286//EREBP-like factor	gi|449458980|ref|XP_004147224.1|//PREDICTED: ethylene-responsive transcription factor 6 [Cucumis sativus]
Csa3G730800	1431	5.62	48.63	3.11320455601777	Up	WRKY	WRKY	-	NA	GO:0003677//DNA binding;GO:0001071//nucleic acid binding transcription factor activity	GO:0010467//gene expression	K10268//F-box and leucine-rich repeat protein 2/20;K13424//WRKY transcription factor 33	gi|700203583|gb|KGN58716.1|//hypothetical protein Csa_3G730800 [Cucumis sativus]
Csa2G297180	706	18.15	150.54	3.05210542324722	Up	FAR1	FAR1	-	NA	GO:0043565//sequence-specific DNA binding;GO:0003700//transcription factor activity, sequence-specific DNA binding	GO:0006355//regulation of transcription, DNA-templated	K18835//WRKY transcription factor 2;K13424//WRKY transcription factor 33	gi|700206975|gb|KGN62094.1|//hypothetical protein Csa_2G297180 [Cucumis sativus];gi|449461443|ref|XP_004148451.1|//PREDICTED: probable WRKY transcription factor 51 [Cucumis sativus]
Csa6G382950	891	19.23	159.04	3.04795899422239	Up	NAC	NAM	-	NA	GO:0003676//nucleic acid binding	NA	K02437//glycine cleavage system H protein;K13126//polyadenylate-binding protein;K00162//pyruvate dehydrogenase E1 component beta subunit [EC:1.2.4.1];K05941//glutathione gamma-glutamylcysteinyltransferase [EC:2.3.2.15]	gi|449464170|ref|XP_004149802.1|//PREDICTED: NAC domain-containing protein 2-like [Cucumis sativus]
Csa5G209490	855	1.19	9.82	3.04476145100675	Up	MYB	Myb_DNA-binding	ARID,Response_reg,SNF2_N	NA	NA	NA	K09422//myb proto-oncogene protein, plant	gi|449460939|ref|XP_004148201.1|//PREDICTED: transcription factor MYB44-like [Cucumis sativus]
Csa6G452770	1031	1.5	8.54	3.02384674195437	Up	NAC	NAM	-	NA	NA	NA	K12581//CCR4-NOT transcription complex subunit 7/8;K13126//polyadenylate-binding protein	gi|700193072|gb|KGN48276.1|//hypothetical protein Csa_6G452770 [Cucumis sativus]
Csa6G522650	786	0.65	5.21	3.00277174925005	Up	WRKY	WRKY	-	NA	GO:0003677//DNA binding;GO:0001071//nucleic acid binding transcription factor activity	GO:0010467//gene expression	K18835//WRKY transcription factor 2;K08819//cyclin-dependent kinase 12/13 [EC:2.7.11.22 2.7.11.23]	gi|700194167|gb|KGN49371.1|//hypothetical protein Csa_6G522650 [Cucumis sativus]
Csa3G645940	630	19.5	148.24	2.92638875739029	Up	Tify	tify	GATA	NA	NA	NA	K13464//jasmonate ZIM domain-containing protein	gi|449453375|ref|XP_004144433.1|//PREDICTED: protein TIFY 11A [Cucumis sativus]
Csa1G025960	1731	15.53	116.05	2.90161678784454	Up	WRKY	WRKY	-	NA	NA	NA	K13424//WRKY transcription factor 33	gi|525507238|ref|NP_001267657.1|//uncharacterized protein LOC101207158 [Cucumis sativus]
Csa3G852470	960	14.47	102	2.8174323252145	Up	NAC	NAM	-	NA	NA	NA	K02437//glycine cleavage system H protein;K00162//pyruvate dehydrogenase E1 component beta subunit [EC:1.2.4.1];K13126//polyadenylate-binding protein;K05941//glutathione gamma-glutamylcysteinyltransferase [EC:2.3.2.15]	gi|449460145|ref|XP_004147806.1|//PREDICTED: NAC domain-containing protein 72-like isoform X2 [Cucumis sativus]
CsaUNG031640	954	13.64	92.73	2.76519251055521	Up	AP2-EREBP	AP2	-	NA	NA	NA	K09287//RAV-like factor	gi|449466693|ref|XP_004151060.1|//PREDICTED: AP2/ERF and B3 domain-containing transcription factor RAV1-like [Cucumis sativus]
Csa7G452040	1182	0.32	2.17	2.76155123244448	Up	bHLH	HLH	-	NA	NA	NA	K10863//aprataxin [EC:3.-.-.-]	gi|449448090|ref|XP_004141799.1|//PREDICTED: transcription factor bHLH87 [Cucumis sativus]
Csa3G017320	840	18.82	127.39	2.75891349860158	Up	AP2-EREBP	AP2	-	NA	NA	NA	K09286//EREBP-like factor	gi|449458984|ref|XP_004147226.1|//PREDICTED: ethylene-responsive transcription factor 2 [Cucumis sativus]
Csa4G193250	993	2.3	13.33	2.7151251479038	Up	NAC	NAM	-	NA	GO:0003676//nucleic acid binding	NA	K00162//pyruvate dehydrogenase E1 component beta subunit [EC:1.2.4.1];K13126//polyadenylate-binding protein;K05941//glutathione gamma-glutamylcysteinyltransferase [EC:2.3.2.15]	gi|449459638|ref|XP_004147553.1|//PREDICTED: NAC domain-containing protein 100-like [Cucumis sativus]
Csa7G328830	891	7.12	42.99	2.5940519640169	Up	WRKY	WRKY	-	NA	GO:0003677//DNA binding;GO:0001071//nucleic acid binding transcription factor activity	GO:0010467//gene expression	K13425//WRKY transcription factor 22;K16225//probable WRKY transcription factor 52	gi|525507306|ref|NP_001267693.1|//probable WRKY transcription factor 46-like [Cucumis sativus]
Csa1G045480	2047	0.57	3.43	2.58917475200807	Up	WRKY	WRKY	-	NA	NA	NA	K18835//WRKY transcription factor 2;K13424//WRKY transcription factor 33	gi|449469657|ref|XP_004152535.1|//PREDICTED: probable WRKY transcription factor 61 [Cucumis sativus];gi|700209154|gb|KGN64250.1|//hypothetical protein Csa_1G045480 [Cucumis sativus]
Csa7G407710	2905	1.13	6.79	2.58708880182954	Up	GRAS	GRAS	-	NA	NA	GO:0006355//regulation of transcription, DNA-templated	K14494//DELLA protein	gi|449436743|ref|XP_004136152.1|//PREDICTED: DELLA protein RGL2 [Cucumis sativus];gi|700189785|gb|KGN45018.1|//hypothetical protein Csa_7G407710 [Cucumis sativus]
Csa7G407820	729	0.88	5.1	2.53492181822156	Up	WRKY	WRKY	-	NA	GO:0003677//DNA binding;GO:0001071//nucleic acid binding transcription factor activity	GO:0010467//gene expression	K13424//WRKY transcription factor 33;K18834//WRKY transcription factor 1	gi|525507288|ref|NP_001267684.1|//probable WRKY transcription factor 68-like [Cucumis sativus]
Csa3G168940	918	0.55	3.13	2.50865913340796	Up	MYB	Myb_DNA-binding	ARID,Response_reg,SNF2_N	NA	NA	NA	K09422//myb proto-oncogene protein, plant	gi|778679114|ref|XP_011651090.1|//PREDICTED: transcription factor MYB108 [Cucumis sativus]
Csa5G180920	546	10.21	57.95	2.50482579501603	Up	C2H2	zf-C2H2	PHD	NA	NA	NA	K14841//ribosome biogenesis protein NSA1	gi|449459930|ref|XP_004147699.1|//PREDICTED: zinc finger protein ZAT12-like [Cucumis sativus]
Csa2G338830	900	42	220.91	2.3949974940815	Up	NAC	NAM	-	NA	GO:0003676//nucleic acid binding	NA	K02437//glycine cleavage system H protein;K00162//pyruvate dehydrogenase E1 component beta subunit [EC:1.2.4.1];K13126//polyadenylate-binding protein;K05941//glutathione gamma-glutamylcysteinyltransferase [EC:2.3.2.15]	gi|449459190|ref|XP_004147329.1|//PREDICTED: NAC domain-containing protein 2 [Cucumis sativus]
Csa7G049170	897	8.63	44.72	2.37348772366424	Up	WRKY	WRKY	-	NA	GO:0003677//DNA binding;GO:0001071//nucleic acid binding transcription factor activity	GO:0010467//gene expression	K13425//WRKY transcription factor 22	gi|525507180|ref|NP_001267628.1|//probable WRKY transcription factor 69-like [Cucumis sativus]
Csa3G405510	2332	10.24	51.87	2.34068465436344	Up	GRAS	GRAS	-	NA	NA	GO:0006355//regulation of transcription, DNA-templated	K14494//DELLA protein	gi|449468516|ref|XP_004151967.1|//PREDICTED: scarecrow-like protein 21 [Cucumis sativus]
Csa1G572390	1827	9.54	47.86	2.32675922553299	Up	NAC	NAM	-	GO:0005634//nucleus	GO:0003677//DNA binding	GO:0006355//regulation of transcription, DNA-templated	K12581//CCR4-NOT transcription complex subunit 7/8;K13126//polyadenylate-binding protein;K05941//glutathione gamma-glutamylcysteinyltransferase [EC:2.3.2.15];K01054//acylglycerol lipase [EC:3.1.1.23]	gi|778662593|ref|XP_011659914.1|//PREDICTED: NAC transcription factor 25-like [Cucumis sativus]
Csa4G293330	489	1.65	8.24	2.3201783129374	Up	C2H2	zf-C2H2	PHD	NA	NA	NA	NA	gi|449448667|ref|XP_004142087.1|//PREDICTED: zinc finger protein ZAT11 [Cucumis sativus]
Csa5G167120	708	39.8	197.94	2.31422284785508	Up	AP2-EREBP	AP2	-	NA	NA	NA	K09286//EREBP-like factor	gi|778700301|ref|XP_004143677.2|//PREDICTED: ethylene-responsive transcription factor ERF105 [Cucumis sativus]
Csa6G290790	603	9.58	46.26	2.27166770490001	Up	LOB	DUF260	-	NA	NA	NA	K13944;K01227//mannosyl-glycoprotein endo-beta-N-acetylglucosaminidase [EC:3.2.1.96]	gi|449463671|ref|XP_004149555.1|//PREDICTED: LOB domain-containing protein 1-like [Cucumis sativus]
Csa2G006070	1044	1.44	6.69	2.21593739919915	Up	C3H	zf-CCCH	PHD,SNF2_N,zf-C2H2	NA	GO:0005488//binding	NA	K18753//butyrate response factor 1;K15308//tristetraprolin	gi|449443305|ref|XP_004139420.1|//PREDICTED: zinc finger CCCH domain-containing protein 39-like [Cucumis sativus]
Csa3G740800	1347	3.35	15.36	2.19694521537602	Up	MYB	Myb_DNA-binding	ARID,Response_reg,SNF2_N	NA	NA	NA	K09422//myb proto-oncogene protein, plant	gi|449440407|ref|XP_004137976.1|//PREDICTED: transcription factor RAX2 [Cucumis sativus];gi|700203855|gb|KGN58988.1|//hypothetical protein Csa_3G740800 [Cucumis sativus]
Csa4G038810	1218	11.76	53.48	2.18511140525699	Up	C2H2	zf-C2H2	PHD	NA	NA	NA	K12309//beta-galactosidase [EC:3.2.1.23]	gi|449462892|ref|XP_004149169.1|//PREDICTED: protein indeterminate-domain 1-like [Cucumis sativus]
Csa6G190300	2155	8.73	38.68	2.1475342358474	Up	GRAS	GRAS	-	NA	NA	NA	K14494//DELLA protein	gi|449450910|ref|XP_004143205.1|//PREDICTED: scarecrow-like protein 34 [Cucumis sativus]
Csa6G490870	873	26.35	114.72	2.12224206217733	Up	HSF	HSF_DNA-bind	-	NA	NA	NA	K09419//heat shock transcription factor, other eukaryote	gi|449448324|ref|XP_004141916.1|//PREDICTED: heat shock factor protein HSF24 [Cucumis sativus]
Csa2G382490	2392	25.83	107.63	2.05896071165658	Up	HB	Homeobox,KNOX1,KNOX2	-	NA	NA	NA	K16670//homeobox protein Meis2;K15613//homeobox protein Meis1	gi|700207857|gb|KGN62976.1|//hypothetical protein Csa_2G382490 [Cucumis sativus];gi|778672603|ref|XP_011649837.1|//PREDICTED: homeobox protein knotted-1-like 3 isoform X2 [Cucumis sativus];gi|449441886|ref|XP_004138713.1|//PREDICTED: homeobox protein knotted-1-like 3 isoform X1 [Cucumis sativus]
Csa6G446400	678	4.98	20.52	2.04281308353897	Up	TCP	TCP	-	NA	NA	NA	K13035//beta-cyano-L-alanine hydratase/nitrilase [EC:3.5.5.4 4.2.1.65];K16221//transcription factor TCP21 (protein CCA1 HIKING EXPEDITION)	gi|700192975|gb|KGN48179.1|//hypothetical protein Csa_6G446400 [Cucumis sativus]
Csa5G175870	522	3.32	13.46	2.01942326326339	Up	LOB	DUF260	-	NA	NA	NA	K13944;K01227//mannosyl-glycoprotein endo-beta-N-acetylglucosaminidase [EC:3.2.1.96]	gi|700195287|gb|KGN50464.1|//hypothetical protein Csa_5G175870 [Cucumis sativus]
Csa7G353010	783	1.96	7.93	2.01646721158877	Up	NAC	NAM	-	NA	NA	NA	K13126//polyadenylate-binding protein;K05941//glutathione gamma-glutamylcysteinyltransferase [EC:2.3.2.15]	gi|778727061|ref|XP_011659202.1|//PREDICTED: NAC domain-containing protein 21/22-like [Cucumis sativus]
Csa7G043020	1578	9.68	39.11	2.01445858345835	Up	WRKY	WRKY	-	NA	NA	NA	K13424//WRKY transcription factor 33	gi|778723759|ref|XP_011658698.1|//PREDICTED: probable WRKY transcription factor 31 [Cucumis sativus]
Csa7G022420	711	3.79	15.19	2.00285211633099	Up	NAC	NAM	-	NA	NA	NA	K13126//polyadenylate-binding protein	gi|700188082|gb|KGN43315.1|//hypothetical protein Csa_7G022420 [Cucumis sativus]
Csa1G020890	1259	1.59	6.3	1.98632506310292	Up	TCP	TCP	-	NA	NA	NA	NA	gi|700208702|gb|KGN63798.1|//hypothetical protein Csa_1G020890 [Cucumis sativus];gi|778656282|ref|XP_011648749.1|//PREDICTED: transcription factor DICHOTOMA-like [Cucumis sativus]
Csa3G630280	1584	3.27	12.56	1.94147392339354	Up	AP2-EREBP	AP2	-	GO:0005634//nucleus	GO:0003677//DNA binding;GO:0003700//transcription factor activity, sequence-specific DNA binding	GO:0006355//regulation of transcription, DNA-templated;GO:0007275//multicellular organism development	NA	gi|778682164|ref|XP_011651656.1|//PREDICTED: ethylene-responsive transcription factor-like protein At4g13040 isoform X1 [Cucumis sativus]
Csa3G135120	687	12.83	47.84	1.89869621910842	Up	AP2-EREBP	AP2	-	NA	NA	GO:0006351//transcription, DNA-templated	K14516//ethylene-responsive transcription factor 1	gi|449432562|ref|XP_004134068.1|//PREDICTED: ethylene-responsive transcription factor 1B [Cucumis sativus]
Csa5G606310	873	44.12	161.21	1.86943654225907	Up	NAC	NAM	-	NA	NA	NA	K02437//glycine cleavage system H protein;K13126//polyadenylate-binding protein;K00162//pyruvate dehydrogenase E1 component beta subunit [EC:1.2.4.1];K05941//glutathione gamma-glutamylcysteinyltransferase [EC:2.3.2.15]	gi|449434768|ref|XP_004135168.1|//PREDICTED: NAC transcription factor 29-like [Cucumis sativus]
Csa4G664530	1056	28.78	102.45	1.83178148715831	Up	bZIP	bZIP_1,bZIP_2,bZIP_Maf	HLH	NA	NA	NA	NA	gi|778697290|ref|XP_011654291.1|//PREDICTED: bZIP transcription factor 60 [Cucumis sativus]
Csa7G074870	1725	1.97	6.59	1.74208283555168	Up	G2-like	G2-like	Response_reg	GO:0005634//nucleus	GO:0003677//DNA binding	GO:0006355//regulation of transcription, DNA-templated	K14491//two-component response regulator ARR-B family;K14317//nuclear pore complex protein Nup214	gi|449438687|ref|XP_004137119.1|//PREDICTED: uncharacterized protein LOC101221044 [Cucumis sativus]
Csa5G637160	978	3.48	11.55	1.73073364045469	Up	NAC	NAM	-	NA	NA	NA	K00162//pyruvate dehydrogenase E1 component beta subunit [EC:1.2.4.1];K13126//polyadenylate-binding protein;K05941//glutathione gamma-glutamylcysteinyltransferase [EC:2.3.2.15]	gi|700197298|gb|KGN52475.1|//hypothetical protein Csa_5G637160 [Cucumis sativus]
Csa1G042290	2106	20.55	68.14	1.7293635535273	Up	AP2-EREBP	AP2	-	GO:0005634//nucleus	GO:0003677//DNA binding;GO:0003700//transcription factor activity, sequence-specific DNA binding	GO:0006355//regulation of transcription, DNA-templated	K13434//pathogenesis-related genes transcriptional activator PTI6	gi|449439397|ref|XP_004137472.1|//PREDICTED: ethylene-responsive transcription factor CRF3-like [Cucumis sativus]
Csa2G428380	882	17.14	56.66	1.7249634922656	Up	WRKY	WRKY	-	NA	GO:0003677//DNA binding;GO:0001071//nucleic acid binding transcription factor activity	GO:0010467//gene expression	K13425//WRKY transcription factor 22;K13424//WRKY transcription factor 33	gi|525507250|ref|NP_001267663.1|//probable WRKY transcription factor 15-like [Cucumis sativus]
Csa6G518040	741	88.08	286.64	1.70235357464637	Up	AP2-EREBP	AP2	-	NA	NA	NA	K09286//EREBP-like factor	gi|525506959|ref|NP_001267525.1|//ethylene-responsive transcription factor 4-like [Cucumis sativus]
Csa1G023060	735	15.95	51.3	1.68540240184218	Up	LOB	DUF260	-	NA	NA	NA	NA	gi|449440939|ref|XP_004138241.1|//PREDICTED: LOB domain-containing protein 41-like [Cucumis sativus]
Csa6G499870	1131	7.96	25.38	1.67285173329746	Up	C2H2	zf-C2H2	PHD	NA	GO:0005488//binding	NA	K09201//transcription factor YY;K09191//general transcription factor IIIA;K12309//beta-galactosidase [EC:3.2.1.23]	gi|449451615|ref|XP_004143557.1|//PREDICTED: protein SENSITIVE TO PROTON RHIZOTOXICITY 1-like [Cucumis sativus]
Csa6G511040	696	52.08	159.5	1.61475507037396	Up	BBR/BPC	GAGA_bind	-	NA	GO:0043169//cation binding	GO:0006812//cation transport	NA	gi|778720120|ref|XP_004134803.2|//PREDICTED: protein PXR1-like [Cucumis sativus]
Csa6G327430	981	8.87	27.14	1.61341471111779	Up	WRKY	WRKY	-	NA	NA	NA	K18835//WRKY transcription factor 2;K13424//WRKY transcription factor 33	gi|778714810|ref|XP_011657294.1|//PREDICTED: probable WRKY transcription factor 48 [Cucumis sativus]
Csa3G011620	1986	59.82	181.75	1.60325554857497	Up	bHLH	HLH	-	NA	NA	NA	K13422//transcription factor MYC2	gi|449462019|ref|XP_004148739.1|//PREDICTED: transcription factor MYC2-like [Cucumis sativus]
Csa3G181940	882	18.58	56.21	1.59707631319227	Up	HSF	HSF_DNA-bind	-	NA	NA	NA	K09419//heat shock transcription factor, other eukaryote	gi|449446047|ref|XP_004140783.1|//PREDICTED: heat stress transcription factor B-2b-like [Cucumis sativus]
Csa3G062590	1779	15.83	47.69	1.59102552725718	Up	NAC	NAM	-	GO:0005634//nucleus;GO:0016021//integral component of membrane	GO:0003677//DNA binding	GO:0006355//regulation of transcription, DNA-templated	K12581//CCR4-NOT transcription complex subunit 7/8;K13126//polyadenylate-binding protein;K01054//acylglycerol lipase [EC:3.1.1.23]	gi|778675916|ref|XP_004149581.2|//PREDICTED: protein NTM1-like 8 isoform X2 [Cucumis sativus];gi|778675913|ref|XP_011650496.1|//PREDICTED: protein NTM1-like 8 isoform X1 [Cucumis sativus]
Csa5G207940	2372	93.24	260.26	1.48093268784822	Up	C3H	zf-CCCH	PHD,SNF2_N,zf-C2H2	NA	GO:0046872//metal ion binding	NA	K15172//transcription elongation factor SPT5;K07560//D-tyrosyl-tRNA(Tyr) deacylase [EC:3.1.-.-]	gi|700195488|gb|KGN50665.1|//hypothetical protein Csa_5G207940 [Cucumis sativus];gi|449460904|ref|XP_004148184.1|//PREDICTED: zinc finger CCCH domain-containing protein 29 [Cucumis sativus]
Csa3G598900	1587	4.81	13.25	1.46188356056788	Up	bHLH	HLH	-	NA	NA	NA	K16190//glucuronokinase [EC:2.7.1.43];K13422//transcription factor MYC2	gi|778681821|ref|XP_011651587.1|//PREDICTED: transcription factor ICE1 [Cucumis sativus]
Csa4G305350	1973	6.8	18.53	1.44625622988956	Up	MYB	Myb_DNA-binding	ARID,Response_reg,SNF2_N	GO:0043231//intracellular membrane-bounded organelle	GO:0003677//DNA binding;GO:0003676//nucleic acid binding	NA	K09422//myb proto-oncogene protein, plant	gi|449460333|ref|XP_004147900.1|//PREDICTED: transcription factor MYB86 [Cucumis sativus]
Csa2G327500	1668	41.79	112.64	1.43048957531489	Up	NAC	NAM	-	NA	NA	NA	K13459//disease resistance protein RPS2;K13126//polyadenylate-binding protein	gi|449465328|ref|XP_004150380.1|//PREDICTED: NAC domain-containing protein 78-like isoform X2 [Cucumis sativus]
Csa1G032450	1728	1.87	5.4	1.43038546361228	Up	TAZ	zf-TAZ	PHD	GO:0043231//intracellular membrane-bounded organelle;GO:0005634//nucleus	GO:0000989//transcription factor activity, transcription factor binding;GO:0004402//histone acetyltransferase activity;GO:0046914//transition metal ion binding;GO:0008270//zinc ion binding;GO:0003712//transcription cofactor activity;GO:0004468//lysine N-acetyltransferase activity, acting on acetyl phosphate as donor	GO:0006355//regulation of transcription, DNA-templated;GO:0006351//transcription, DNA-templated;GO:0016573//histone acetylation	K00517	gi|449439605|ref|XP_004137576.1|//PREDICTED: BTB/POZ and TAZ domain-containing protein 1-like [Cucumis sativus]
Csa6G104640	642	9.75	26.19	1.42554193571362	Up	AP2-EREBP	AP2	-	GO:0043231//intracellular membrane-bounded organelle	GO:0001071//nucleic acid binding transcription factor activity;GO:0003676//nucleic acid binding	GO:0006351//transcription, DNA-templated	K09286//EREBP-like factor	gi|449445736|ref|XP_004140628.1|//PREDICTED: ethylene-responsive transcription factor ERF039-like [Cucumis sativus]
Csa3G278920	909	6.27	16.66	1.40985105256351	Up	LOB	DUF260	-	NA	NA	NA	K13945	gi|700202618|gb|KGN57751.1|//hypothetical protein Csa_3G278920 [Cucumis sativus]
Csa1G425940	726	25.76	67.74	1.39487539337954	Up	bHLH	HLH	-	NA	NA	NA	K13422//transcription factor MYC2	gi|449457201|ref|XP_004146337.1|//PREDICTED: transcription factor bHLH35-like [Cucumis sativus]
Csa4G192190	825	5.11	12.59	1.30088308678139	Up	ABI3VP1	B3	AP2,Auxin_resp	NA	NA	NA	K05275//pyridoxine 4-dehydrogenase [EC:1.1.1.65]	gi|449459644|ref|XP_004147556.1|//PREDICTED: B3 domain-containing protein At2g31420-like [Cucumis sativus]
Csa4G290190	2114	4.7	9.97	1.29256471013195	Up	MYB	Myb_DNA-binding	ARID,Response_reg,SNF2_N	NA	GO:0003677//DNA binding	NA	K17046//protein DEK	gi|449448952|ref|XP_004142229.1|//PREDICTED: bromodomain-containing protein DDB_G0270170 isoform X1 [Cucumis sativus]
Csa1G168870	1101	3.19	7.73	1.27691199015998	Up	NAC	NAM	-	NA	NA	NA	K13126//polyadenylate-binding protein	gi|449443648|ref|XP_004139589.1|//PREDICTED: protein NTM1-like 8 isoform X1 [Cucumis sativus]
Csa1G426980	846	15.81	38.16	1.27122380364714	Up	WRKY	WRKY	-	NA	GO:0003677//DNA binding;GO:0001071//nucleic acid binding transcription factor activity	GO:0010467//gene expression	K13425//WRKY transcription factor 22	gi|700210401|gb|KGN65497.1|//hypothetical protein Csa_1G426980 [Cucumis sativus]
Csa3G910660	930	14.7	35.17	1.25852917990158	Up	MYB	Myb_DNA-binding	ARID,Response_reg,SNF2_N	NA	NA	NA	K09522//DnaJ homolog subfamily C member 2	gi|449461543|ref|XP_004148501.1|//PREDICTED: dnaJ homolog subfamily C member 2 [Cucumis sativus]
Csa6G500550	816	46.5	110.8	1.25265526005379	Up	AP2-EREBP	AP2	-	NA	NA	NA	K09286//EREBP-like factor	gi|700193559|gb|KGN48763.1|//AP2/ERF domain-containing transcription factor [Cucumis sativus]
Csa6G185260	2258	39.15	92.65	1.24277866873623	Up	C3H	zf-CCCH	PHD,SNF2_N,zf-C2H2	NA	GO:0046872//metal ion binding	NA	K07560//D-tyrosyl-tRNA(Tyr) deacylase [EC:3.1.-.-];K15172//transcription elongation factor SPT5	gi|700191872|gb|KGN47076.1|//hypothetical protein Csa_6G185260 [Cucumis sativus];gi|449450822|ref|XP_004143161.1|//PREDICTED: zinc finger CCCH domain-containing protein 66 [Cucumis sativus]
Csa4G639950	1637	9.56	22.41	1.22906012552964	Up	NAC	NAM	-	GO:0005634//nucleus	GO:0003677//DNA binding	GO:0006355//regulation of transcription, DNA-templated	K13126//polyadenylate-binding protein	gi|778696183|ref|XP_004141384.2|//PREDICTED: protein CUP-SHAPED COTYLEDON 3-like [Cucumis sativus]
Csa7G433210	1408	3.32	7.77	1.22673135706079	Up	C3H	zf-CCCH	PHD,SNF2_N,zf-C2H2	NA	GO:0046872//metal ion binding	NA	NA	gi|449436118|ref|XP_004135841.1|//PREDICTED: zinc finger CCCH domain-containing protein 39-like isoform X1 [Cucumis sativus]
Novel_G000180	1889	4.73	11.6	1.22543929689531	Up	WRKY	WRKY	-	NA	GO:0043565//sequence-specific DNA binding;GO:0003700//transcription factor activity, sequence-specific DNA binding	GO:0006355//regulation of transcription, DNA-templated	K13424//WRKY transcription factor 33;K18834//WRKY transcription factor 1	gi|778681548|ref|XP_011651538.1|//PREDICTED: probable WRKY transcription factor 68 isoform X1 [Cucumis sativus]
Csa3G826690	942	4.7	10.92	1.21624019435485	Up	MYB	Myb_DNA-binding	ARID,Response_reg,SNF2_N	NA	NA	NA	K09422//myb proto-oncogene protein, plant	gi|449459472|ref|XP_004147470.1|//PREDICTED: myb-related protein 306-like [Cucumis sativus]
Csa6G046240	702	11.61	26.78	1.20578798845874	Up	MYB	Myb_DNA-binding	ARID,Response_reg,SNF2_N	NA	NA	NA	K05674//ATP-binding cassette, subfamily C (CFTR/MRP), member 10;K08869//aarF domain-containing kinase;K01184//polygalacturonase [EC:3.2.1.15];K17613//calcineurin-binding protein cabin-1	gi|449446301|ref|XP_004140910.1|//PREDICTED: transcription factor DIVARICATA [Cucumis sativus]
Csa6G495020	702	16.58	37.6	1.18128865506925	Up	LOB	DUF260	-	NA	NA	NA	K01227//mannosyl-glycoprotein endo-beta-N-acetylglucosaminidase [EC:3.2.1.96]	gi|449448242|ref|XP_004141875.1|//PREDICTED: LOB domain-containing protein 37-like [Cucumis sativus]
Csa6G483360	2455	24.8	55.92	1.1730242401012	Up	NAC	NAM	-	GO:0005634//nucleus	GO:0003677//DNA binding	GO:0006355//regulation of transcription, DNA-templated	K12581//CCR4-NOT transcription complex subunit 7/8;K00162//pyruvate dehydrogenase E1 component beta subunit [EC:1.2.4.1];K13126//polyadenylate-binding protein;K13459//disease resistance protein RPS2;K01054//acylglycerol lipase [EC:3.1.1.23]	gi|449461851|ref|XP_004148655.1|//PREDICTED: NAC domain-containing protein 19 [Cucumis sativus]
Csa6G366370	1708	7.25	16.34	1.17235508324339	Up	WRKY	WRKY	-	NA	NA	NA	K18835//WRKY transcription factor 2;K10268//F-box and leucine-rich repeat protein 2/20;K13424//WRKY transcription factor 33	gi|659089366|ref|XP_008445469.1|//PREDICTED: probable WRKY transcription factor 57 isoform X2 [Cucumis melo];gi|778722260|ref|XP_011658445.1|//PREDICTED: probable WRKY transcription factor 57, partial [Cucumis sativus]
Csa1G269350	1575	18.42	40.61	1.14056196583299	Up	bHLH	HLH	-	NA	GO:0046983//protein dimerization activity	NA	K16189//phytochrome-interacting factor 4;K12126//phytochrome-interacting factor 3	gi|449457905|ref|XP_004146688.1|//PREDICTED: transcription factor bHLH82 [Cucumis sativus]
Csa6G491080	885	26.55	58.37	1.13651520719072	Up	WRKY	WRKY	-	NA	NA	NA	K13425//WRKY transcription factor 22	gi|449448302|ref|XP_004141905.1|//PREDICTED: probable WRKY transcription factor 15 [Cucumis sativus]
Csa5G651640	885	23.53	51.58	1.13231045256492	Up	MYB	Myb_DNA-binding	ARID,Response_reg,SNF2_N	NA	NA	NA	K09422//myb proto-oncogene protein, plant	gi|449447787|ref|XP_004141649.1|//PREDICTED: transcription repressor MYB6 [Cucumis sativus]
Csa2G360820	1853	14.57	31.81	1.126479494475	Up	LIM	LIM	-	NA	GO:0008270//zinc ion binding	NA	K05760//paxillin	gi|449470017|ref|XP_004152715.1|//PREDICTED: protein DA1 isoform X1 [Cucumis sativus]
Csa1G597690	696	19.16	41.41	1.1118816416337	Up	Tify	tify	GATA	NA	NA	NA	K13464//jasmonate ZIM domain-containing protein	gi|449452598|ref|XP_004144046.1|//PREDICTED: protein TIFY 10A [Cucumis sativus]
Csa4G017190	1113	46.45	99.91	1.10495048810033	Up	bHLH	HLH	-	NA	NA	NA	K16189//phytochrome-interacting factor 4;K11253//histone H3;K12126//phytochrome-interacting factor 3	gi|449468734|ref|XP_004152076.1|//PREDICTED: transcription factor bHLH128 [Cucumis sativus]
Csa7G378570	1329	17.74	37.94	1.09671366911041	Up	bZIP	bZIP_1,bZIP_2,bZIP_Maf	HLH	NA	NA	NA	NA	gi|778727519|ref|XP_011659270.1|//PREDICTED: light-inducible protein CPRF2-like [Cucumis sativus]
Csa7G322080	2774	11.4	24.26	1.08954572606841	Up	GRAS	GRAS	-	NA	NA	GO:0006355//regulation of transcription, DNA-templated	K14777//ATP-dependent RNA helicase DDX47/RRP3 [EC:3.6.4.13];K14494//DELLA protein	gi|449443762|ref|XP_004139646.1|//PREDICTED: scarecrow-like protein 1 [Cucumis sativus];gi|700189278|gb|KGN44511.1|//hypothetical protein Csa_7G322080 [Cucumis sativus]
Csa2G251490	1513	69.19	146.92	1.08639535521507	Up	C2C2-GATA	GATA	-	GO:0005634//nucleus	GO:0043565//sequence-specific DNA binding;GO:0008270//zinc ion binding;GO:0003700//transcription factor activity, sequence-specific DNA binding	GO:0045893//positive regulation of transcription, DNA-templated	K19027//zinc finger FYVE domain-containing protein 26;K17895//GATA-binding protein 3;K17894	gi|449464846|ref|XP_004150140.1|//PREDICTED: GATA transcription factor 5-like [Cucumis sativus]
Csa4G166950	870	14.18	30.1	1.08590595440755	Up	C2H2	zf-C2H2	PHD	GO:0044464//cell part	GO:0046914//transition metal ion binding	NA	NA	gi|700198693|gb|KGN53851.1|//hypothetical protein Csa_4G166950 [Cucumis sativus]
Csa1G085390	1598	63.09	131.87	1.06363313754131	Up	C2H2	zf-C2H2	PHD	NA	NA	NA	K14794//ribosomal RNA-processing protein 12;K12309//beta-galactosidase [EC:3.2.1.23]	gi|449462075|ref|XP_004148767.1|//PREDICTED: protein indeterminate-domain 2 [Cucumis sativus];gi|700209647|gb|KGN64743.1|//hypothetical protein Csa_1G085390 [Cucumis sativus]
Csa2G445270	1124	22.6	47.19	1.06215839883429	Up	PLATZ	PLATZ	-	NA	NA	NA	NA	gi|449460690|ref|XP_004148078.1|//PREDICTED: uncharacterized protein LOC101216747 [Cucumis sativus]
Csa3G902190	945	85.35	177.57	1.05692480425077	Up	PLATZ	PLATZ	-	NA	NA	NA	NA	gi|700205243|gb|KGN60376.1|//hypothetical protein Csa_3G902190 [Cucumis sativus]
Csa3G750350	2629	2.72	5.64	1.05208851114845	Up	HSF	HSF_DNA-bind	-	GO:0005634//nucleus	GO:0043565//sequence-specific DNA binding;GO:0003700//transcription factor activity, sequence-specific DNA binding	GO:0006355//regulation of transcription, DNA-templated	K09419//heat shock transcription factor, other eukaryote	gi|778684107|ref|XP_011651989.1|//PREDICTED: heat stress transcription factor A-3 [Cucumis sativus]
Csa6G014640	3932	31.5	64.33	1.05089842023879	Up	C2C2-YABBY	YABBY	-	NA	NA	NA	K12472//epidermal growth factor receptor substrate 15	gi|778709716|ref|XP_011656443.1|//PREDICTED: uncharacterized protein LOC105435747 [Cucumis sativus]
Csa4G361820	888	70.34	144.3	1.03665405975325	Up	NAC	NAM	-	NA	GO:0003676//nucleic acid binding	NA	K02437//glycine cleavage system H protein;K00162//pyruvate dehydrogenase E1 component beta subunit [EC:1.2.4.1];K13126//polyadenylate-binding protein;K05941//glutathione gamma-glutamylcysteinyltransferase [EC:2.3.2.15]	gi|449449759|ref|XP_004142632.1|//PREDICTED: NAC domain-containing protein 2-like [Cucumis sativus]
Csa6G052680	2066	41.6	84.51	1.02253853606763	Up	NAC	NAM	-	GO:0005634//nucleus;GO:0016021//integral component of membrane	GO:0003677//DNA binding	GO:0006355//regulation of transcription, DNA-templated	K12581//CCR4-NOT transcription complex subunit 7/8;K02437//glycine cleavage system H protein;K13126//polyadenylate-binding protein;K13459//disease resistance protein RPS2;K01054//acylglycerol lipase [EC:3.1.1.23]	gi|449446361|ref|XP_004140940.1|//PREDICTED: uncharacterized protein LOC101217428 [Cucumis sativus]
Csa6G511620	1626	14.64	29.43	1.00737198865635	Up	GRAS	GRAS	-	NA	NA	NA	K14494//DELLA protein	gi|449434034|ref|XP_004134801.1|//PREDICTED: scarecrow-like protein 13 [Cucumis sativus]
Csa1G523610	2097	53.6	107.46	1.00349483736198	Up	GRAS	GRAS	-	NA	NA	NA	K14494//DELLA protein	gi|449455094|ref|XP_004145288.1|//PREDICTED: scarecrow-like protein 34 [Cucumis sativus]
Csa6G051520	1296	8.46	0.01	-9.72451385311995	Down	EIL	EIN3	-	GO:0043231//intracellular membrane-bounded organelle	GO:0001071//nucleic acid binding transcription factor activity	GO:0010467//gene expression	K14514//ethylene-insensitive protein 3	gi|700190871|gb|KGN46075.1|//hypothetical protein Csa_6G051520 [Cucumis sativus]
Csa2G138780	1203	3.83	0.43	-3.15493582722286	Down	AP2-EREBP	AP2	-	NA	NA	NA	K09286//EREBP-like factor	gi|449442477|ref|XP_004139008.1|//PREDICTED: ethylene-responsive transcription factor ERF062 [Cucumis sativus]
Csa1G011540	1332	2.3	0.29	-2.9875090558168	Down	bHLH	HLH	-	NA	NA	NA	K16189//phytochrome-interacting factor 4;K12126//phytochrome-interacting factor 3	gi|778656018|ref|XP_004138310.2|//PREDICTED: transcription factor UNE10 [Cucumis sativus];gi|700208606|gb|KGN63702.1|//hypothetical protein Csa_1G011540 [Cucumis sativus]
Novel_G000317	1674	2.69	0.48	-2.48649986183547	Down	mTERF	mTERF	-	NA	NA	NA	K15032//mTERF domain-containing protein, mitochondrial	gi|659090428|ref|XP_008446011.1|//PREDICTED: uncharacterized protein LOC103488865 [Cucumis melo]
Csa3G822390	669	5.5	1	-2.33628338786443	Down	LOB	DUF260	-	NA	NA	NA	K13944;K13945//null	gi|449438012|ref|XP_004136784.1|//PREDICTED: LOB domain-containing protein 20 [Cucumis sativus]
Csa4G124910	1035	152.43	32.14	-2.24570503584378	Down	C2C2-CO-like	CCT,zf-B_box	GATA,PLATZ	NA	NA	NA	K12135//zinc finger protein CONSTANS	gi|449438975|ref|XP_004137263.1|//PREDICTED: zinc finger protein CONSTANS-LIKE 2-like [Cucumis sativus]
Csa6G157640	1719	3.45	0.73	-2.24062799278551	Down	G2-like	G2-like	Response_reg	GO:0005634//nucleus	GO:0003677//DNA binding	GO:0006355//regulation of transcription, DNA-templated	K12741//heterogeneous nuclear ribonucleoprotein A1/A3;K06236//collagen, type I, alpha;K14491//two-component response regulator ARR-B family;K14317//nuclear pore complex protein Nup214	gi|449466077|ref|XP_004150753.1|//PREDICTED: two-component response regulator ARR10-like isoform X1 [Cucumis sativus]
Csa3G303630	804	4.61	0.98	-2.23391309631413	Down	MYB	Myb_DNA-binding	ARID,Response_reg,SNF2_N	NA	NA	NA	K09422//myb proto-oncogene protein, plant	gi|449456221|ref|XP_004145848.1|//PREDICTED: protein ODORANT1-like [Cucumis sativus]
Csa4G628890	1017	6.56	1.4	-2.22826898767312	Down	bZIP	bZIP_1,bZIP_2,bZIP_Maf	HLH	NA	NA	NA	NA	gi|778695798|ref|XP_004146037.2|//PREDICTED: basic leucine zipper 34 [Cucumis sativus]
Csa5G156220	756	6.46	1.4	-2.20610733774896	Down	bHLH	HLH	-	NA	NA	NA	K18486//heart-and neural crest derivatives-expressed protein 2	gi|821595469|ref|NP_001295816.1|//transcription factor bHLH118-like [Cucumis sativus]
Novel_G000084	993	126.54	29.1	-2.12497130031685	Down	bHLH	HLH	-	NA	NA	NA	K13422//transcription factor MYC2	gi|778667623|ref|XP_011648963.1|//PREDICTED: transcription factor bHLH35-like [Cucumis sativus]
Csa3G019400	645	8.69	2.8	-2.06277264867331	Down	AP2-EREBP	AP2	-	GO:0043231//intracellular membrane-bounded organelle	GO:0001071//nucleic acid binding transcription factor activity;GO:0003676//nucleic acid binding	GO:0006351//transcription, DNA-templated	K09286//EREBP-like factor	gi|449458972|ref|XP_004147220.1|//PREDICTED: ethylene-responsive transcription factor ERF039-like [Cucumis sativus]
Csa6G039540	1005	55.76	15.9	-1.88563775534174	Down	C2C2-CO-like	CCT,zf-B_box	GATA,PLATZ	GO:0044464//cell part	GO:0046914//transition metal ion binding	NA	K12130//pseudo-response regulator 5;K12135//zinc finger protein CONSTANS	gi|449446203|ref|XP_004140861.1|//PREDICTED: zinc finger protein CONSTANS-LIKE 6 [Cucumis sativus]
Csa7G169070	655	110.71	30.53	-1.85848604633137	Down	MYB	Myb_DNA-binding	ARID,Response_reg,SNF2_N	GO:0043231//intracellular membrane-bounded organelle;GO:0005634//nucleus	GO:0003677//DNA binding;GO:0003676//nucleic acid binding	NA	K01184//polygalacturonase [EC:3.2.1.15];K09522//DnaJ homolog subfamily C member 2	gi|449466805|ref|XP_004151116.1|//PREDICTED: protein RADIALIS-like 1 [Cucumis sativus]
Novel_G000326	1981	4.71	1.35	-1.80276765256195	Down	mTERF	mTERF	-	NA	NA	NA	K15032//mTERF domain-containing protein, mitochondrial	gi|778704338|ref|XP_011655521.1|//PREDICTED: uncharacterized protein LOC101219984 [Cucumis sativus]
Csa3G100800	1062	19.3	5.6	-1.76477682932906	Down	NAC	NAM	-	NA	NA	NA	K02437//glycine cleavage system H protein;K13126//polyadenylate-binding protein;K00162//pyruvate dehydrogenase E1 component beta subunit [EC:1.2.4.1];K05941//glutathione gamma-glutamylcysteinyltransferase [EC:2.3.2.15]	gi|449463130|ref|XP_004149287.1|//PREDICTED: NAC transcription factor 25 [Cucumis sativus]
Csa3G895680	684	55.35	16.41	-1.7540080781552	Down	AP2-EREBP	AP2	-	NA	NA	NA	K09286//EREBP-like factor	gi|449436878|ref|XP_004136219.1|//PREDICTED: ethylene-responsive transcription factor ERF043-like [Cucumis sativus]
Csa2G374590	696	43.52	14.38	-1.59761488081104	Down	AP2-EREBP	AP2	-	NA	NA	NA	K09286//EREBP-like factor	gi|778672054|ref|XP_004150289.2|//PREDICTED: ethylene-responsive transcription factor TINY-like [Cucumis sativus]
Csa2G351740	885	39.32	13.6	-1.53165667020288	Down	MYB	Myb_DNA-binding	ARID,Response_reg,SNF2_N	NA	GO:0005488//binding	NA	K08869//aarF domain-containing kinase;K17613//calcineurin-binding protein cabin-1	gi|449450578|ref|XP_004143039.1|//PREDICTED: transcription factor MYB1R1-like [Cucumis sativus]
Csa1G573650	1137	4.51	1.58	-1.51320287507828	Down	bZIP	bZIP_1,bZIP_2,bZIP_Maf	HLH	NA	NA	NA	K09060//plant G-box-binding factor;K14432//ABA responsive element binding factor	gi|449435740|ref|XP_004135652.1|//PREDICTED: light-inducible protein CPRF2-like [Cucumis sativus]
Csa3G734180	2283	3.49	1.24	-1.49288691582278	Down	GRAS	GRAS	-	NA	NA	NA	K14494//DELLA protein	gi|449440329|ref|XP_004137937.1|//PREDICTED: scarecrow-like protein 9 [Cucumis sativus]
Csa3G033810	1090	29.54	10.77	-1.45565157622058	Down	C2C2-YABBY	YABBY	-	NA	NA	GO:0007275//multicellular organism development	NA	gi|778675499|ref|XP_011650422.1|//PREDICTED: protein YABBY 4 isoform X1 [Cucumis sativus];gi|449465864|ref|XP_004150647.1|//PREDICTED: protein YABBY 4 isoform X2 [Cucumis sativus]
Csa2G006820	1111	74.72	27.26	-1.45470889290445	Down	C2C2-YABBY	YABBY	-	NA	NA	GO:0007275//multicellular organism development	NA	gi|700205568|gb|KGN60687.1|//hypothetical protein Csa_2G006820 [Cucumis sativus];gi|449443073|ref|XP_004139305.1|//PREDICTED: axial regulator YABBY 5-like [Cucumis sativus]
Csa3G113370	1299	18.26	6.79	-1.42720328573949	Down	NAC	NAM	-	NA	NA	NA	K13126//polyadenylate-binding protein	gi|778676468|ref|XP_011650588.1|//PREDICTED: NAC domain-containing protein 55 [Cucumis sativus]
Csa3G843820	873	31.3	12	-1.3831282513241	Down	C2C2-GATA	GATA	-	NA	NA	NA	K17894	gi|449446764|ref|XP_004141141.1|//PREDICTED: GATA transcription factor 9-like [Cucumis sativus]
Csa3G893390	978	6.19	2.39	-1.37292879123352	Down	bHLH	HLH	-	NA	NA	NA	K16190//glucuronokinase [EC:2.7.1.43];K13422//transcription factor MYC2	gi|449436924|ref|XP_004136242.1|//PREDICTED: transcription factor bHLH93-like [Cucumis sativus]
Csa2G004690	915	212.41	82.71	-1.3607180148566	Down	HSF	HSF_DNA-bind	-	NA	NA	NA	K09419//heat shock transcription factor, other eukaryote	gi|449443329|ref|XP_004139432.1|//PREDICTED: heat stress transcription factor C-1 [Cucumis sativus]
Csa4G631590	609	23.4	9.11	-1.33861775764026	Down	SBP	SBP	-	NA	NA	NA	K13415//protein brassinosteroid insensitive 1 [EC:2.7.10.1 2.7.11.1]	gi|449456643|ref|XP_004146058.1|//PREDICTED: squamosa promoter-binding protein 1 [Cucumis sativus]
Csa2G408430	1368	85.6	33.92	-1.33547462672531	Down	G2-like	G2-like	Response_reg	NA	NA	NA	K14491//two-component response regulator ARR-B family	gi|449442040|ref|XP_004138790.1|//PREDICTED: transcription activator GLK1-like [Cucumis sativus]
Csa5G613560	834	12.69	5.4	-1.33219643034119	Down	OFP	Ovate	-	NA	NA	NA	K01870//isoleucyl-tRNA synthetase [EC:6.1.1.5]	gi|449435170|ref|XP_004135368.1|//PREDICTED: transcription repressor OFP13-like [Cucumis sativus]
Csa1G051760	1653	21.8	8.8	-1.30875270613963	Down	bHLH	HLH	-	NA	NA	NA	K16190//glucuronokinase [EC:2.7.1.43];K13422//transcription factor MYC2	gi|449473864|ref|XP_004154005.1|//PREDICTED: transcription factor ICE1-like isoform X1 [Cucumis sativus]
Csa6G108570	1669	79.13	31.96	-1.30795734895819	Down	bHLH	HLH	-	GO:0016021//integral component of membrane	GO:0046983//protein dimerization activity	NA	K16189//phytochrome-interacting factor 4;K12126//phytochrome-interacting factor 3	gi|778712228|ref|XP_011656866.1|//PREDICTED: transcription factor UNE10 [Cucumis sativus]
Csa3G207940	2137	11.74	4.75	-1.30543298989174	Down	ABI3VP1	B3	AP2,Auxin_resp	GO:0005634//nucleus	GO:0003677//DNA binding	GO:0006355//regulation of transcription, DNA-templated	NA	gi|778680100|ref|XP_011651246.1|//PREDICTED: B3 domain-containing protein Os01g0234100-like [Cucumis sativus]
Csa3G778360	705	11.19	4.54	-1.30144583368548	Down	OFP	Ovate	-	NA	NA	NA	NA	gi|778684415|ref|XP_004136703.2|//PREDICTED: transcription repressor OFP15-like [Cucumis sativus]
Csa6G489970	1227	14.1	5.75	-1.28482309459908	Down	ABI3VP1	B3	AP2,Auxin_resp	NA	NA	NA	K14328//regulator of nonsense transcripts 3;K09287//RAV-like factor	gi|778718250|ref|XP_011657840.1|//PREDICTED: B3 domain-containing transcription factor VRN1-like [Cucumis sativus]
Csa2G228420	1827	23.57	9.72	-1.27792353964439	Down	HSF	HSF_DNA-bind	-	GO:0005634//nucleus	GO:0043565//sequence-specific DNA binding;GO:0003700//transcription factor activity, sequence-specific DNA binding	GO:0006355//regulation of transcription, DNA-templated	K09419//heat shock transcription factor, other eukaryote	gi|449474405|ref|XP_004154162.1|//PREDICTED: heat stress transcription factor A-7a [Cucumis sativus]
Csa4G269160	552	38.43	15.86	-1.27684020535882	Down	FHA	FHA	-	NA	NA	NA	K09578//peptidyl-prolyl cis-trans isomerase NIMA-interacting 1 [EC:5.2.1.8];K00326//cytochrome-b5 reductase [EC:1.6.2.2]	gi|449463863|ref|XP_004149650.1|//PREDICTED: uncharacterized protein LOC101219513 isoform X1 [Cucumis sativus]
Csa2G402090	1181	57.49	23.8	-1.2723494572182	Down	mTERF	mTERF	-	GO:0005739//mitochondrion;GO:0009507//chloroplast	GO:0003690//double-stranded DNA binding	GO:0006355//regulation of transcription, DNA-templated	NA	gi|778672961|ref|XP_011649898.1|//PREDICTED: uncharacterized protein LOC101218603 isoform X1 [Cucumis sativus]
Csa1G039000	1298	50.71	21.45	-1.24129262667973	Down	bHLH	HLH	-	NA	NA	NA	K12126//phytochrome-interacting factor 3	gi|778656983|ref|XP_011650055.1|//PREDICTED: transcription factor PIF7 isoform X2 [Cucumis sativus];gi|449439645|ref|XP_004137596.1|//PREDICTED: transcription factor PIF7 isoform X1 [Cucumis sativus]
Csa1G535790	1135	48.12	20.39	-1.23877486715948	Down	mTERF	mTERF	-	GO:0005739//mitochondrion;GO:0009507//chloroplast	GO:0003690//double-stranded DNA binding	GO:0006355//regulation of transcription, DNA-templated	K15032//mTERF domain-containing protein, mitochondrial	gi|449475105|ref|XP_004154376.1|//PREDICTED: transcription termination factor 3, mitochondrial [Cucumis sativus]
Csa3G687740	1546	46.55	19.84	-1.23036914205928	Down	Sigma70-like	Sigma70_r2,Sigma70_r3,Sigma70_r4	-	NA	GO:0003677//DNA binding;GO:0016987//sigma factor activity;GO:0003700//transcription factor activity, sequence-specific DNA binding	GO:0006355//regulation of transcription, DNA-templated;GO:0006352//DNA-templated transcription, initiation	K01872//alanyl-tRNA synthetase [EC:6.1.1.7];K03086//RNA polymerase primary sigma factor	gi|449464016|ref|XP_004149725.1|//PREDICTED: RNA polymerase sigma factor sigD, chloroplastic [Cucumis sativus]
Csa1G043040	534	52.84	23.15	-1.19061827309923	Down	zf-HD	ZF-HD_dimer	-	NA	NA	NA	NA	gi|449439493|ref|XP_004137520.1|//PREDICTED: zinc-finger homeodomain protein 9-like [Cucumis sativus]
Csa3G878210	1053	36.4	15.96	-1.18947779886371	Down	AP2-EREBP	AP2	-	GO:0005634//nucleus	GO:0003677//DNA binding;GO:0003700//transcription factor activity, sequence-specific DNA binding	GO:0006355//regulation of transcription, DNA-templated	K13434//pathogenesis-related genes transcriptional activator PTI6;K09286//EREBP-like factor	gi|449437136|ref|XP_004136348.1|//PREDICTED: ethylene-responsive transcription factor SHINE 2 [Cucumis sativus]
Csa5G429450	2862	34.32	15.9	-1.18545674697286	Down	S1Fa-like	S1FA	-	GO:0016020//membrane	GO:0000166//nucleotide binding;GO:0004672//protein kinase activity	NA	K00924	gi|778702671|ref|XP_011655243.1|//PREDICTED: probable receptor protein kinase TMK1 [Cucumis sativus]
Csa3G179160	1367	8.21	3.63	-1.17741267378205	Down	MADS	SRF-TF	-	NA	NA	GO:0008152//metabolic process	K09260//MADS-box transcription enhancer factor 2A	gi|449465182|ref|XP_004150307.1|//PREDICTED: agamous-like MADS-box protein AGL19 isoform X1 [Cucumis sativus];gi|778679435|ref|XP_011651130.1|//PREDICTED: MADS-box protein SOC1-like isoform X3 [Cucumis sativus];gi|700202193|gb|KGN57326.1|//hypothetical protein Csa_3G179160 [Cucumis sativus]
Csa1G023050	1083	42.03	18.71	-1.16760989791119	Down	C2C2-CO-like	CCT,zf-B_box	GATA,PLATZ	NA	NA	NA	K12130//pseudo-response regulator 5;K12135//zinc finger protein CONSTANS;K12129//pseudo-response regulator 7	gi|778656334|ref|XP_011648856.1|//PREDICTED: zinc finger protein CONSTANS-LIKE 16 [Cucumis sativus]
Csa3G622450	3641	27.74	12.38	-1.16395647310934	Down	bHLH	HLH	-	NA	GO:0046983//protein dimerization activity	NA	K16189//phytochrome-interacting factor 4;K12126//phytochrome-interacting factor 3	gi|778682039|ref|XP_011651631.1|//PREDICTED: transcription factor PIF1-like [Cucumis sativus]
Csa1G065960	708	45.82	20.51	-1.15964996682482	Down	bHLH	HLH	-	NA	NA	NA	K13422//transcription factor MYC2	gi|449454698|ref|XP_004145091.1|//PREDICTED: transcription factor ILR3-like [Cucumis sativus]
Csa3G901180	966	11.24	5.11	-1.1372468392833	Down	bHLH	HLH	-	NA	NA	NA	K18485//myogenic factor 6;K13422//transcription factor MYC2	gi|449436822|ref|XP_004136191.1|//PREDICTED: transcription factor bHLH71 [Cucumis sativus]
Csa6G426940	1024	50.12	23.26	-1.10753531784864	Down	C2C2-YABBY	YABBY	-	NA	NA	GO:0007275//multicellular organism development;GO:0010158//abaxial cell fate specification	NA	gi|449444829|ref|XP_004140176.1|//PREDICTED: putative axial regulator YABBY 2 [Cucumis sativus]
Csa3G122580	1003	7.77	3.62	-1.1019249013245	Down	LIM	LIM	-	NA	GO:0008270//zinc ion binding	NA	K09377//cysteine and glycine-rich protein	gi|449432173|ref|XP_004133874.1|//PREDICTED: LIM domain-containing protein PLIM2b-like [Cucumis sativus]
Csa1G269870	1020	35.74	16.66	-1.10115123367594	Down	AP2-EREBP	AP2	-	NA	NA	GO:0044238//primary metabolic process;GO:0009987//cellular process	K09287//RAV-like factor	gi|449457911|ref|XP_004146691.1|//PREDICTED: AP2/ERF and B3 domain-containing transcription factor At1g50680-like [Cucumis sativus]
Csa6G516850	1096	11.85	5.53	-1.09953567355091	Down	MYB	Myb_DNA-binding	ARID,Response_reg,SNF2_N	NA	NA	NA	K09422//myb proto-oncogene protein, plant	gi|700193973|gb|KGN49177.1|//hypothetical protein Csa_6G516850 [Cucumis sativus];gi|449434358|ref|XP_004134963.1|//PREDICTED: myb-related protein 315-like [Cucumis sativus]
Csa2G174080	534	18.19	8.49	-1.09930908409845	Down	C2H2	zf-C2H2	PHD	NA	NA	NA	NA	gi|700206472|gb|KGN61591.1|//hypothetical protein Csa_2G174080 [Cucumis sativus]
Csa7G352440	1367	24.4	11.46	-1.06882985195428	Down	AP2-EREBP	AP2	-	GO:0005634//nucleus	GO:0003677//DNA binding;GO:0003700//transcription factor activity, sequence-specific DNA binding	GO:0006355//regulation of transcription, DNA-templated;GO:0007275//multicellular organism development	K09284//AP2-like factor, euAP2 lineage	gi|449464126|ref|XP_004149780.1|//PREDICTED: ethylene-responsive transcription factor-like protein At4g13040 [Cucumis sativus]
Csa1G015610	1017	48.88	23.31	-1.06829528068986	Down	C2C2-Dof	zf-Dof	-	NA	NA	NA	K16222//Dof zinc finger protein DOF5.5	gi|778656191|ref|XP_011648588.1|//PREDICTED: dof zinc finger protein DOF5.4 [Cucumis sativus]
Csa1G269860	4387	25.17	12.8	-1.0590847618359	Down	AP2-EREBP	AP2	-	GO:0005634//nucleus	GO:0003677//DNA binding;GO:0003700//transcription factor activity, sequence-specific DNA binding	GO:0006355//regulation of transcription, DNA-templated	K09287//RAV-like factor	gi|449457911|ref|XP_004146691.1|//PREDICTED: AP2/ERF and B3 domain-containing transcription factor At1g50680-like [Cucumis sativus];gi|700210148|gb|KGN65244.1|//hypothetical protein Csa_1G269860 [Cucumis sativus]
Csa5G622830	1527	87.04	41.86	-1.05610624499463	Down	C2C2-GATA	GATA	-	GO:0005634//nucleus	GO:0043565//sequence-specific DNA binding;GO:0008270//zinc ion binding;GO:0005488//binding;GO:0003700//transcription factor activity, sequence-specific DNA binding	GO:0045893//positive regulation of transcription, DNA-templated	K19027//zinc finger FYVE domain-containing protein 26;K17895//GATA-binding protein 3;K17894	gi|449449346|ref|XP_004142426.1|//PREDICTED: GATA transcription factor 8 [Cucumis sativus]
Csa1G051590	1784	27.19	13.15	-1.0480133518451	Down	SBP	SBP	-	GO:0005634//nucleus	GO:0003677//DNA binding	NA	K13415//protein brassinosteroid insensitive 1 [EC:2.7.10.1 2.7.11.1]	gi|778658165|ref|XP_011652208.1|//PREDICTED: squamosa promoter-binding-like protein 13A [Cucumis sativus]
Csa6G497260	1029	20.25	9.81	-1.04559686644011	Down	bHLH	HLH	-	NA	NA	NA	K16190//glucuronokinase [EC:2.7.1.43];K13422//transcription factor MYC2	gi|778718916|ref|XP_004143539.2|//PREDICTED: transcription factor bHLH93 isoform X2 [Cucumis sativus]
Csa1G690370	1857	31.7	15.13	-1.0381102539051	Down	MYB	Myb_DNA-binding	ARID,Response_reg,SNF2_N	NA	NA	NA	NA	gi|449449541|ref|XP_004142523.1|//PREDICTED: trihelix transcription factor GTL2 [Cucumis sativus]
Csa7G168060	531	88.54	43.23	-1.03429653720196	Down	MYB	Myb_DNA-binding	ARID,Response_reg,SNF2_N	GO:0005634//nucleus	GO:0003677//DNA binding	NA	K01184//polygalacturonase [EC:3.2.1.15];K09522//DnaJ homolog subfamily C member 2	gi|778725452|ref|XP_011658943.1|//PREDICTED: protein RADIALIS-like 1 [Cucumis sativus]
Csa6G446410	1689	80.9	39.66	-1.02845502508849	Down	Sigma70-like	Sigma70_r2,Sigma70_r3,Sigma70_r4	-	NA	NA	NA	K03086//RNA polymerase primary sigma factor	gi|700192976|gb|KGN48180.1|//hypothetical protein Csa_6G446410 [Cucumis sativus]
Csa5G175170	771	59.08	28.98	-1.02761223120786	Down	TCP	TCP	-	NA	NA	NA	K13035//beta-cyano-L-alanine hydratase/nitrilase [EC:3.5.5.4 4.2.1.65];K16221//transcription factor TCP21 (protein CCA1 HIKING EXPEDITION)	gi|449451743|ref|XP_004143620.1|//PREDICTED: transcription factor TCP7-like [Cucumis sativus]
Csa1G051740	1119	17.34	8.52	-1.025178562996	Down	bHLH	HLH	-	NA	NA	NA	K16189//phytochrome-interacting factor 4;K11253//histone H3;K12126//phytochrome-interacting factor 3	gi|449473858|ref|XP_004154003.1|//PREDICTED: transcription factor bHLH137 [Cucumis sativus]
Csa6G078550	1743	36.9	18.18	-1.02126861675365	Down	Sigma70-like	Sigma70_r2,Sigma70_r3,Sigma70_r4	-	NA	NA	NA	K03086//RNA polymerase primary sigma factor	gi|449473951|ref|XP_004154029.1|//PREDICTED: RNA polymerase sigma factor sigB isoform X1 [Cucumis sativus]
Csa4G643070	540	80.73	40.13	-1.00842373558158	Down	LIM	LIM	-	NA	GO:0046914//transition metal ion binding	NA	K09377//cysteine and glycine-rich protein	gi|449447067|ref|XP_004141291.1|//PREDICTED: LIM domain-containing protein WLIM1 [Cucumis sativus]

## Sheet: B10_1 dpi
GeneID	Length	B10_0-Expression	B10_1-Expression	log2FoldChange(B10_1/B10_0)	Up/Down-Regulation	TF_family	Included_domain	Excluded_domain	Cellular Component	Molecular Function	Biological Process	Kegg Orthology	Nr Description
Csa6G133770	846	0.01	30.72	11.5849625007212	Up	AP2-EREBP	AP2	-	NA	NA	NA	K13434//pathogenesis-related genes transcriptional activator PTI6	gi|778712954|ref|XP_004140026.2|//PREDICTED: ethylene-responsive transcription factor ERF069-like [Cucumis sativus];gi|700191564|gb|KGN46768.1|//hypothetical protein Csa_6G133770 [Cucumis sativus]
Csa6G303740	420	0.01	5.89	9.20212382383046	Up	C2H2	zf-C2H2	PHD	NA	NA	NA	K14841//ribosome biogenesis protein NSA1	gi|449461007|ref|XP_004148235.1|//PREDICTED: zinc finger protein ZAT11 [Cucumis sativus]
Csa6G055940	1215	0.01	5.87	9.19721669311005	Up	AP2-EREBP	AP2	-	NA	NA	NA	K09286//EREBP-like factor	gi|449446496|ref|XP_004141007.1|//PREDICTED: ethylene-responsive transcription factor ABR1-like [Cucumis sativus]
Csa1G000550	651	0.01	3.66	8.51569983828404	Up	AP2-EREBP	AP2	-	NA	NA	GO:0006351//transcription, DNA-templated	K09286//EREBP-like factor	gi|700208335|gb|KGN63431.1|//hypothetical protein Csa_1G000550 [Cucumis sativus]
Csa1G481720	468	0.01	3.47	8.43879185257826	Up	C2H2	zf-C2H2	PHD	NA	NA	NA	K14841//ribosome biogenesis protein NSA1	gi|700210574|gb|KGN65670.1|//hypothetical protein Csa_1G481720 [Cucumis sativus]
Csa7G022420	711	0.01	2.52	7.97727992349992	Up	NAC	NAM	-	NA	NA	NA	K13126//polyadenylate-binding protein	gi|700188082|gb|KGN43315.1|//hypothetical protein Csa_7G022420 [Cucumis sativus]
Csa6G121970	810	0.01	2.37	7.88874324889826	Up	MYB	Myb_DNA-binding	ARID,Response_reg,SNF2_N	NA	NA	NA	K09422//myb proto-oncogene protein, plant	gi|778712704|ref|XP_004140052.2|//PREDICTED: transcription repressor MYB6-like [Cucumis sativus]
Csa3G822450	759	0.01	2.21	7.78790255939143	Up	HSF	HSF_DNA-bind	-	NA	NA	NA	K09419//heat shock transcription factor, other eukaryote	gi|449438018|ref|XP_004136787.1|//PREDICTED: heat stress transcription factor B-3-like [Cucumis sativus]
Novel_G000415	1209	0.01	2.17	7.76155123244448	Up	MYB	Myb_DNA-binding	ARID,Response_reg,SNF2_N	NA	NA	NA	K09422//myb proto-oncogene protein, plant	gi|449438468|ref|XP_004137010.1|//PREDICTED: transcription repressor MYB6-like [Cucumis sativus]
Novel_G000421	1074	0.01	1.98	7.62935662007961	Up	MADS	SRF-TF	-	NA	NA	NA	K09260//MADS-box transcription enhancer factor 2A	gi|778724526|ref|XP_004136891.2|//PREDICTED: MADS-box protein SVP-like [Cucumis sativus]
Csa2G297760	858	0.15	6.69	5.47897180503294	Up	AP2-EREBP	AP2	-	NA	NA	NA	K09286//EREBP-like factor	gi|700206984|gb|KGN62103.1|//hypothetical protein Csa_2G297760 [Cucumis sativus]
Csa1G042350	1276	0.69	28.64	5.37529132048609	Up	MYB	Myb_DNA-binding	ARID,Response_reg,SNF2_N	NA	NA	NA	K09422//myb proto-oncogene protein, plant	gi|700209027|gb|KGN64123.1|//hypothetical protein Csa_1G042350 [Cucumis sativus];gi|449439407|ref|XP_004137477.1|//PREDICTED: transcription factor MYB108-like [Cucumis sativus]
Csa1G589140	1739	0.31	8.39	4.75833069005295	Up	bHLH	HLH	-	NA	NA	NA	K13422//transcription factor MYC2	gi|778663004|ref|XP_011659992.1|//PREDICTED: putative transcription factor bHLH041 isoform X1 [Cucumis sativus];gi|700211160|gb|KGN66256.1|//hypothetical protein Csa_1G589140 [Cucumis sativus];gi|778663007|ref|XP_011659993.1|//PREDICTED: putative transcription factor bHLH041 isoform X2 [Cucumis sativus]
Csa5G608390	1071	0.48	12.81	4.73809225962049	Up	G2-like	G2-like	Response_reg	NA	NA	NA	K14491//two-component response regulator ARR-B family	gi|449434656|ref|XP_004135112.1|//PREDICTED: uncharacterized protein LOC101203539 [Cucumis sativus]
Csa3G731130	924	0.7	14.43	4.36557256754623	Up	Trihelix	trihelix	-	NA	NA	NA	NA	gi|778683209|ref|XP_004137715.2|//PREDICTED: trihelix transcription factor GT-3b [Cucumis sativus]
Csa6G495100	1392	0.36	5.9	3.82159684463338	Up	TAZ	zf-TAZ	PHD	GO:0043231//intracellular membrane-bounded organelle	GO:0000989//transcription factor activity, transcription factor binding;GO:0046914//transition metal ion binding;GO:0004468//lysine N-acetyltransferase activity, acting on acetyl phosphate as donor	GO:0006351//transcription, DNA-templated	K00517	gi|700193401|gb|KGN48605.1|//hypothetical protein Csa_6G495100 [Cucumis sativus]
Csa6G486960	925	3.46	43.49	3.65183976582734	Up	FAR1	FAR1	-	NA	GO:0043565//sequence-specific DNA binding;GO:0003700//transcription factor activity, sequence-specific DNA binding	GO:0006355//regulation of transcription, DNA-templated	K18835//WRKY transcription factor 2;K13424//WRKY transcription factor 33	gi|449448420|ref|XP_004141964.1|//PREDICTED: probable WRKY transcription factor 51 [Cucumis sativus]
Csa4G012390	648	1.2	12.69	3.63705101186961	Up	WRKY	WRKY	-	NA	NA	NA	K18835//WRKY transcription factor 2;K13424//WRKY transcription factor 33	gi|778689952|ref|XP_004152302.2|//PREDICTED: probable WRKY transcription factor 75 [Cucumis sativus]
Csa6G517310	594	0.45	5.54	3.62188906971951	Up	HSF	HSF_DNA-bind	-	NA	NA	NA	K09419//heat shock transcription factor, other eukaryote	gi|778720797|ref|XP_011658207.1|//PREDICTED: heat stress transcription factor B-2a-like [Cucumis sativus]
Csa6G363560	462	1.19	13.21	3.47259698793888	Up	FAR1	FAR1	-	NA	NA	NA	K13424//WRKY transcription factor 33	gi|449453049|ref|XP_004144271.1|//PREDICTED: probable WRKY transcription factor 50 isoform X1 [Cucumis sativus]
Csa4G051470	1806	2.2	18.96	3.23053176614646	Up	WRKY	WRKY	-	NA	GO:0043565//sequence-specific DNA binding;GO:0003700//transcription factor activity, sequence-specific DNA binding	GO:0006355//regulation of transcription, DNA-templated	K18835//WRKY transcription factor 2;K13426//WRKY transcription factor 29;K13425//WRKY transcription factor 22;K16225//probable WRKY transcription factor 52	gi|449464068|ref|XP_004149751.1|//PREDICTED: probable WRKY transcription factor 41 [Cucumis sativus]
Csa2G000420	1444	0.38	3.51	3.20739970686098	Up	bHLH	HLH	-	NA	NA	NA	K13422//transcription factor MYC2	gi|700205415|gb|KGN60534.1|//hypothetical protein Csa_2G000420 [Cucumis sativus];gi|659071355|ref|XP_008459381.1|//PREDICTED: putative transcription factor bHLH041 isoform X1 [Cucumis melo]
Csa3G199590	660	0.6	5.33	3.15110112715066	Up	MYB	Myb_DNA-binding	ARID,Response_reg,SNF2_N	NA	NA	NA	K09422//myb proto-oncogene protein, plant	gi|449446099|ref|XP_004140809.1|//PREDICTED: transcription factor MYB44-like [Cucumis sativus]
Csa3G168410	972	0.53	4.69	3.14552365795218	Up	WRKY	WRKY	-	NA	NA	NA	K13424//WRKY transcription factor 33	gi|778679105|ref|XP_011651087.1|//PREDICTED: probable WRKY transcription factor 48 [Cucumis sativus]
Csa6G486790	1017	0.38	3.35	3.14008977190155	Up	AP2-EREBP	AP2	-	NA	NA	GO:0010033//response to organic substance;GO:0009987//cellular process	K09286//EREBP-like factor	gi|449448584|ref|XP_004142046.1|//PREDICTED: ethylene-responsive transcription factor ABR1 [Cucumis sativus]
Csa2G177210	687	1.72	13.8	3.00418779696343	Up	AP2-EREBP	AP2	-	NA	NA	NA	K14516//ethylene-responsive transcription factor 1	gi|449466538|ref|XP_004150983.1|//PREDICTED: ethylene-responsive transcription factor 1B-like [Cucumis sativus]
Csa2G174670	1371	0.45	3.46	2.94277513130705	Up	MYB	Myb_DNA-binding	ARID,Response_reg,SNF2_N	GO:0043231//intracellular membrane-bounded organelle	GO:0001071//nucleic acid binding transcription factor activity;GO:0003676//nucleic acid binding	GO:0009743//response to carbohydrate;GO:0006970//response to osmotic stress;GO:0009725//response to hormone;GO:0006351//transcription, DNA-templated;GO:0010038//response to metal ion	K09422//myb proto-oncogene protein, plant	gi|700206482|gb|KGN61601.1|//hypothetical protein Csa_2G174670 [Cucumis sativus];gi|449458822|ref|XP_004147145.1|//PREDICTED: myb-related protein Myb4-like [Cucumis sativus]
Csa2G406060	399	3.19	24.32	2.93051489967872	Up	WRKY	WRKY	-	NA	GO:0003677//DNA binding;GO:0001071//nucleic acid binding transcription factor activity	GO:0010467//gene expression	K18835//WRKY transcription factor 2;K13424//WRKY transcription factor 33	gi|778673213|ref|XP_004138624.2|//PREDICTED: probable WRKY transcription factor 45 [Cucumis sativus]
Csa3G567330	513	2.92	19.83	2.76364440334883	Up	WRKY	WRKY	-	NA	GO:0003677//DNA binding;GO:0001071//nucleic acid binding transcription factor activity	GO:0010467//gene expression	K18835//WRKY transcription factor 2;K13424//WRKY transcription factor 33	gi|659098396|ref|XP_008450119.1|//PREDICTED: probable WRKY transcription factor 75 [Cucumis melo]
Csa5G150420	915	0.56	3.47	2.63143693052066	Up	AP2-EREBP	AP2	-	NA	NA	NA	K09286//EREBP-like factor	gi|449452245|ref|XP_004143870.1|//PREDICTED: ethylene-responsive transcription factor ERF061-like [Cucumis sativus]
Csa3G710870	928	4.74	27.57	2.54014030311193	Up	WRKY	WRKY	-	NA	GO:0003677//DNA binding;GO:0001071//nucleic acid binding transcription factor activity	GO:0010467//gene expression	K18835//WRKY transcription factor 2;K13424//WRKY transcription factor 33;K18834//WRKY transcription factor 1	gi|700203527|gb|KGN58660.1|//hypothetical protein Csa_3G710870 [Cucumis sativus]
Csa6G518170	693	1.71	8.61	2.33201691251095	Up	NAC	NAM	-	GO:0043231//intracellular membrane-bounded organelle	GO:0001071//nucleic acid binding transcription factor activity	NA	NA	gi|778720964|ref|XP_004134944.2|//PREDICTED: NAC domain-containing protein 8-like [Cucumis sativus]
Csa4G641590	450	5.85	27.54	2.2350200296642	Up	AP2-EREBP	AP2	-	GO:0043231//intracellular membrane-bounded organelle	GO:0001071//nucleic acid binding transcription factor activity;GO:0003676//nucleic acid binding	GO:0006351//transcription, DNA-templated	K09286//EREBP-like factor	gi|449447039|ref|XP_004141277.1|//PREDICTED: ethylene-responsive transcription factor ERF011-like [Cucumis sativus]
Csa5G606310	873	31.34	147.29	2.23258239948903	Up	NAC	NAM	-	NA	NA	NA	K02437//glycine cleavage system H protein;K13126//polyadenylate-binding protein;K00162//pyruvate dehydrogenase E1 component beta subunit [EC:1.2.4.1];K05941//glutathione gamma-glutamylcysteinyltransferase [EC:2.3.2.15]	gi|449434768|ref|XP_004135168.1|//PREDICTED: NAC transcription factor 29-like [Cucumis sativus]
Csa3G740800	1347	1.68	7.47	2.15264701001048	Up	MYB	Myb_DNA-binding	ARID,Response_reg,SNF2_N	NA	NA	NA	K09422//myb proto-oncogene protein, plant	gi|449440407|ref|XP_004137976.1|//PREDICTED: transcription factor RAX2 [Cucumis sativus];gi|700203855|gb|KGN58988.1|//hypothetical protein Csa_3G740800 [Cucumis sativus]
Csa2G297180	706	11.8	49.25	2.15216584318191	Up	FAR1	FAR1	-	NA	GO:0043565//sequence-specific DNA binding;GO:0003700//transcription factor activity, sequence-specific DNA binding	GO:0006355//regulation of transcription, DNA-templated	K18835//WRKY transcription factor 2;K13424//WRKY transcription factor 33	gi|700206975|gb|KGN62094.1|//hypothetical protein Csa_2G297180 [Cucumis sativus];gi|449461443|ref|XP_004148451.1|//PREDICTED: probable WRKY transcription factor 51 [Cucumis sativus]
Csa3G730800	1431	8.42	36.69	2.12349476618215	Up	WRKY	WRKY	-	NA	GO:0003677//DNA binding;GO:0001071//nucleic acid binding transcription factor activity	GO:0010467//gene expression	K10268//F-box and leucine-rich repeat protein 2/20;K13424//WRKY transcription factor 33	gi|700203583|gb|KGN58716.1|//hypothetical protein Csa_3G730800 [Cucumis sativus]
Csa2G382650	1083	7.65	30.51	1.99575052699864	Up	WRKY	WRKY	-	NA	GO:0003677//DNA binding;GO:0043565//sequence-specific DNA binding;GO:0003700//transcription factor activity, sequence-specific DNA binding;GO:0001071//nucleic acid binding transcription factor activity	GO:0010467//gene expression;GO:0006355//regulation of transcription, DNA-templated	K18835//WRKY transcription factor 2;K10268//F-box and leucine-rich repeat protein 2/20;K18834//WRKY transcription factor 1	gi|700207873|gb|KGN62992.1|//hypothetical protein Csa_2G382650 [Cucumis sativus];gi|525506965|ref|NP_001267528.1|//probable WRKY transcription factor 40-like [Cucumis sativus]
Csa1G009580	1989	0.74	2.79	1.91466794620024	Up	WRKY	WRKY	-	NA	GO:0043565//sequence-specific DNA binding;GO:0003700//transcription factor activity, sequence-specific DNA binding	GO:0006355//regulation of transcription, DNA-templated	K18835//WRKY transcription factor 2;K13424//WRKY transcription factor 33;K01892//histidyl-tRNA synthetase [EC:6.1.1.21];K18834//WRKY transcription factor 1	gi|778655906|ref|XP_011660002.1|//PREDICTED: probable WRKY transcription factor 61 isoform X2 [Cucumis sativus];gi|778655903|ref|XP_011659995.1|//PREDICTED: probable WRKY transcription factor 61 isoform X1 [Cucumis sativus]
Csa6G518290	534	6.59	24.7	1.90616067146399	Up	AP2-EREBP	AP2	-	NA	NA	NA	K09286//EREBP-like factor;K13433//pathogenesis-related genes transcriptional activator PTI5;K14516//ethylene-responsive transcription factor 1	gi|778721013|ref|XP_004134941.2|//PREDICTED: pathogenesis-related genes transcriptional activator PTI5-like [Cucumis sativus]
Csa5G167110	483	65.85	226.74	1.78378357883724	Up	AP2-EREBP	AP2	-	GO:0043231//intracellular membrane-bounded organelle	GO:0001071//nucleic acid binding transcription factor activity;GO:0003676//nucleic acid binding	GO:0006351//transcription, DNA-templated	K09286//EREBP-like factor	gi|449451860|ref|XP_004143678.1|//PREDICTED: ethylene-responsive transcription factor ERF106 [Cucumis sativus]
Csa1G573650	1137	10.49	35.86	1.77336081029111	Up	bZIP	bZIP_1,bZIP_2,bZIP_Maf	HLH	NA	NA	NA	K09060//plant G-box-binding factor;K14432//ABA responsive element binding factor	gi|449435740|ref|XP_004135652.1|//PREDICTED: light-inducible protein CPRF2-like [Cucumis sativus]
Csa1G425940	726	21.65	72.63	1.74619855510601	Up	bHLH	HLH	-	NA	NA	NA	K13422//transcription factor MYC2	gi|449457201|ref|XP_004146337.1|//PREDICTED: transcription factor bHLH35-like [Cucumis sativus]
Csa1G024160	1193	2.1	7.3	1.74313536140641	Up	MYB	Myb_DNA-binding	ARID,Response_reg,SNF2_N	NA	NA	NA	K09422//myb proto-oncogene protein, plant	gi|700208734|gb|KGN63830.1|//hypothetical protein Csa_1G024160 [Cucumis sativus];gi|449439539|ref|XP_004137543.1|//PREDICTED: myb-related protein 305-like [Cucumis sativus]
Csa6G446400	678	7.19	23.78	1.72568503930636	Up	TCP	TCP	-	NA	NA	NA	K13035//beta-cyano-L-alanine hydratase/nitrilase [EC:3.5.5.4 4.2.1.65];K16221//transcription factor TCP21 (protein CCA1 HIKING EXPEDITION)	gi|700192975|gb|KGN48179.1|//hypothetical protein Csa_6G446400 [Cucumis sativus]
Csa3G727990	990	36.06	118.75	1.71945621156069	Up	WRKY	WRKY	-	NA	GO:0003677//DNA binding;GO:0001071//nucleic acid binding transcription factor activity	GO:0010467//gene expression	K18835//WRKY transcription factor 2;K13424//WRKY transcription factor 33;K16225//probable WRKY transcription factor 52	gi|700203548|gb|KGN58681.1|//WRKY transcription factor [Cucumis sativus]
Csa6G513530	1656	10.47	33.84	1.69246812618914	Up	WRKY	WRKY	-	NA	NA	NA	K10268//F-box and leucine-rich repeat protein 2/20;K13424//WRKY transcription factor 33	gi|700193885|gb|KGN49089.1|//hypothetical protein Csa_6G513530 [Cucumis sativus];gi|449433982|ref|XP_004134775.1|//PREDICTED: probable WRKY transcription factor 31 [Cucumis sativus]
Csa5G223070	849	31.84	100.01	1.6512320212969	Up	WRKY	WRKY	-	NA	GO:0003677//DNA binding;GO:0001071//nucleic acid binding transcription factor activity	GO:0010467//gene expression	K18835//WRKY transcription factor 2;K16225//probable WRKY transcription factor 52	gi|700195571|gb|KGN50748.1|//hypothetical protein Csa_5G223070 [Cucumis sativus]
Csa6G091830	954	11.69	34.78	1.57298300277493	Up	AP2-EREBP	AP2	-	NA	NA	NA	K09286//EREBP-like factor	gi|700191206|gb|KGN46410.1|//hypothetical protein Csa_6G091830 [Cucumis sativus];gi|778722055|ref|XP_011658395.1|//PREDICTED: ethylene-responsive transcription factor ERF113 [Cucumis sativus]
Csa2G166180	1657	2.66	7.78	1.548343909485	Up	VOZ	VOZ	-	NA	NA	NA	K10773//endonuclease III [EC:4.2.99.18]	gi|700206421|gb|KGN61540.1|//hypothetical protein Csa_2G166180 [Cucumis sativus]
Csa1G076100	933	7.71	20.94	1.44145867701577	Up	NAC	NAM	-	NA	NA	NA	NA	gi|778658830|ref|XP_011653355.1|//PREDICTED: NAC domain-containing protein 8-like [Cucumis sativus]
Csa1G005660	561	12.47	33.53	1.42699101796411	Up	LIM	LIM	-	NA	GO:0046914//transition metal ion binding	NA	K09377//cysteine and glycine-rich protein	gi|449440708|ref|XP_004138126.1|//PREDICTED: LIM domain-containing protein WLIM1-like [Cucumis sativus]
Csa1G025960	1731	25.68	68.84	1.4226018949179	Up	WRKY	WRKY	-	NA	NA	NA	K13424//WRKY transcription factor 33	gi|525507238|ref|NP_001267657.1|//uncharacterized protein LOC101207158 [Cucumis sativus]
Csa3G119420	516	6.58	17.63	1.42187298558494	Up	C2C2-Dof	zf-Dof	-	NA	NA	NA	K16222//Dof zinc finger protein DOF5.5	gi|778676830|ref|XP_011650669.1|//PREDICTED: dof zinc finger protein DOF3.7 [Cucumis sativus]
Csa3G119700	1014	11.47	30.62	1.41660889148396	Up	WRKY	WRKY	-	NA	NA	NA	K13425//WRKY transcription factor 22;K16225//probable WRKY transcription factor 52	gi|778676947|ref|XP_011650695.1|//PREDICTED: probable WRKY transcription factor 46 [Cucumis sativus]
Csa3G852470	960	15.9	40.24	1.41503749927884	Up	NAC	NAM	-	NA	NA	NA	K02437//glycine cleavage system H protein;K00162//pyruvate dehydrogenase E1 component beta subunit [EC:1.2.4.1];K13126//polyadenylate-binding protein;K05941//glutathione gamma-glutamylcysteinyltransferase [EC:2.3.2.15]	gi|449460145|ref|XP_004147806.1|//PREDICTED: NAC domain-containing protein 72-like isoform X2 [Cucumis sativus]
Csa3G778360	705	12.48	33.08	1.40634130030903	Up	OFP	Ovate	-	NA	NA	NA	NA	gi|778684415|ref|XP_004136703.2|//PREDICTED: transcription repressor OFP15-like [Cucumis sativus]
Csa3G852460	957	14.34	36.8	1.35966074224247	Up	NAC	NAM	-	NA	GO:0003676//nucleic acid binding	NA	K02437//glycine cleavage system H protein;K13126//polyadenylate-binding protein;K00162//pyruvate dehydrogenase E1 component beta subunit [EC:1.2.4.1];K05941//glutathione gamma-glutamylcysteinyltransferase [EC:2.3.2.15]	gi|449460147|ref|XP_004147807.1|//PREDICTED: NAC domain-containing protein 18-like [Cucumis sativus]
Csa4G193250	993	2.45	6.24	1.34876427985968	Up	NAC	NAM	-	NA	GO:0003676//nucleic acid binding	NA	K00162//pyruvate dehydrogenase E1 component beta subunit [EC:1.2.4.1];K13126//polyadenylate-binding protein;K05941//glutathione gamma-glutamylcysteinyltransferase [EC:2.3.2.15]	gi|449459638|ref|XP_004147553.1|//PREDICTED: NAC domain-containing protein 100-like [Cucumis sativus]
Csa3G101810	891	60.89	153.54	1.33433733515603	Up	NAC	NAM	-	NA	NA	NA	K02437//glycine cleavage system H protein;K00162//pyruvate dehydrogenase E1 component beta subunit [EC:1.2.4.1];K13126//polyadenylate-binding protein;K05941//glutathione gamma-glutamylcysteinyltransferase [EC:2.3.2.15]	gi|449431824|ref|XP_004133700.1|//PREDICTED: NAC domain-containing protein 72-like [Cucumis sativus]
Csa3G018320	1035	7.27	18.15	1.31994227896352	Up	AP2-EREBP	AP2	-	NA	NA	NA	K09286//EREBP-like factor	gi|449458980|ref|XP_004147224.1|//PREDICTED: ethylene-responsive transcription factor 6 [Cucumis sativus]
Novel_G000317	1674	1.63	3.97	1.28426704291188	Up	mTERF	mTERF	-	NA	NA	NA	K15032//mTERF domain-containing protein, mitochondrial	gi|659090428|ref|XP_008446011.1|//PREDICTED: uncharacterized protein LOC103488865 [Cucumis melo]
Csa6G031440	1116	3.98	9.68	1.28223861673095	Up	G2-like	G2-like	Response_reg	NA	NA	NA	K14491//two-component response regulator ARR-B family	gi|778710070|ref|XP_011656513.1|//PREDICTED: probable transcription factor GLK2 [Cucumis sativus]
Csa7G431330	1104	2.65	6.37	1.26530101280574	Up	AP2-EREBP	AP2	-	NA	NA	NA	K09285//AP2-like factor, ANT lineage	gi|778728861|ref|XP_011659487.1|//PREDICTED: AP2-like ethylene-responsive transcription factor At1g16060 [Cucumis sativus]
Csa1G033200	1536	10.42	24.8	1.25098484299573	Up	MYB	Myb_DNA-binding	ARID,Response_reg,SNF2_N	NA	NA	NA	K09422//myb proto-oncogene protein, plant	gi|700208904|gb|KGN64000.1|//hypothetical protein Csa_1G033200 [Cucumis sativus];gi|449439270|ref|XP_004137409.1|//PREDICTED: myb-related protein 306 [Cucumis sativus]
Csa4G011770	717	193.5	455.58	1.23537084763386	Up	NAC	NAM	-	NA	NA	NA	K13126//polyadenylate-binding protein;K00162//pyruvate dehydrogenase E1 component beta subunit [EC:1.2.4.1];K05941//glutathione gamma-glutamylcysteinyltransferase [EC:2.3.2.15]	gi|449468834|ref|XP_004152126.1|//PREDICTED: NAC transcription factor 25 [Cucumis sativus]
Csa3G824990	861	6.3	14.67	1.21944513728611	Up	NAC	NAM	-	NA	NA	NA	K00162//pyruvate dehydrogenase E1 component beta subunit [EC:1.2.4.1];K13126//polyadenylate-binding protein;K05941//glutathione gamma-glutamylcysteinyltransferase [EC:2.3.2.15]	gi|449437840|ref|XP_004136698.1|//PREDICTED: NAC domain-containing protein 100 isoform X1 [Cucumis sativus]
Csa6G490870	873	21.88	50.36	1.20266554492646	Up	HSF	HSF_DNA-bind	-	NA	NA	NA	K09419//heat shock transcription factor, other eukaryote	gi|449448324|ref|XP_004141916.1|//PREDICTED: heat shock factor protein HSF24 [Cucumis sativus]
Csa1G023060	735	19.58	44.61	1.18798638316988	Up	LOB	DUF260	-	NA	NA	NA	NA	gi|449440939|ref|XP_004138241.1|//PREDICTED: LOB domain-containing protein 41-like [Cucumis sativus]
Csa6G014640	3932	27.68	62.69	1.179391386799	Up	C2C2-YABBY	YABBY	-	NA	NA	NA	K12472//epidermal growth factor receptor substrate 15	gi|778709716|ref|XP_011656443.1|//PREDICTED: uncharacterized protein LOC105435747 [Cucumis sativus]
Csa6G289740	801	31.14	70.12	1.1710570516805	Up	C2C2-Dof	zf-Dof	-	NA	NA	NA	K16222//Dof zinc finger protein DOF5.5	gi|449463677|ref|XP_004149558.1|//PREDICTED: dof zinc finger protein DOF5.3-like [Cucumis sativus]
Csa4G664530	1056	27.68	62.03	1.16412218193503	Up	bZIP	bZIP_1,bZIP_2,bZIP_Maf	HLH	NA	NA	NA	NA	gi|778697290|ref|XP_011654291.1|//PREDICTED: bZIP transcription factor 60 [Cucumis sativus]
Csa3G598900	1587	5.43	12.15	1.16193221068878	Up	bHLH	HLH	-	NA	NA	NA	K16190//glucuronokinase [EC:2.7.1.43];K13422//transcription factor MYC2	gi|778681821|ref|XP_011651587.1|//PREDICTED: transcription factor ICE1 [Cucumis sativus]
Csa7G328830	891	6.94	15	1.11195493280498	Up	WRKY	WRKY	-	NA	GO:0003677//DNA binding;GO:0001071//nucleic acid binding transcription factor activity	GO:0010467//gene expression	K13425//WRKY transcription factor 22;K16225//probable WRKY transcription factor 52	gi|525507306|ref|NP_001267693.1|//probable WRKY transcription factor 46-like [Cucumis sativus]
Csa6G511620	1626	13.8	28.23	1.10986658795161	Up	GRAS	GRAS	-	NA	NA	NA	K14494//DELLA protein	gi|449434034|ref|XP_004134801.1|//PREDICTED: scarecrow-like protein 13 [Cucumis sativus]
Csa5G341040	2011	9.98	21.45	1.10386592704965	Up	MYB	Myb_DNA-binding	ARID,Response_reg,SNF2_N	GO:0005634//nucleus	GO:0003677//DNA binding	GO:0006355//regulation of transcription, DNA-templated	K12133//MYB-related transcription factor LHY	gi|778702140|ref|XP_011655141.1|//PREDICTED: protein REVEILLE 1-like isoform X1 [Cucumis sativus]
Csa7G428890	1784	43.6	93.29	1.09739430809399	Up	bHLH	HLH	-	NA	GO:0046983//protein dimerization activity	NA	K16189//phytochrome-interacting factor 4;K11253//histone H3;K12126//phytochrome-interacting factor 3	gi|778728699|ref|XP_011659462.1|//PREDICTED: transcription factor bHLH130 isoform X3 [Cucumis sativus];gi|778728696|ref|XP_011659461.1|//PREDICTED: transcription factor bHLH130 isoform X2 [Cucumis sativus];gi|778728688|ref|XP_011659459.1|//PREDICTED: transcription factor bHLH130 isoform X1 [Cucumis sativus]
Csa6G499870	1131	13.2	27.62	1.08498387109242	Up	C2H2	zf-C2H2	PHD	NA	GO:0005488//binding	NA	K09201//transcription factor YY;K09191//general transcription factor IIIA;K12309//beta-galactosidase [EC:3.2.1.23]	gi|449451615|ref|XP_004143557.1|//PREDICTED: protein SENSITIVE TO PROTON RHIZOTOXICITY 1-like [Cucumis sativus]
Csa2G334550	1046	8.88	18.69	1.07363498739505	Up	NAC	NAM	-	GO:0005634//nucleus	GO:0003677//DNA binding	GO:0006355//regulation of transcription, DNA-templated	NA	gi|449459228|ref|XP_004147348.1|//PREDICTED: NAC transcription factor 29-like [Cucumis sativus]
Csa6G091850	1068	7.87	16.5	1.06803048362569	Up	Trihelix	trihelix	-	NA	NA	NA	NA	gi|449445594|ref|XP_004140557.1|//PREDICTED: uncharacterized protein LOC101222632 isoform X1 [Cucumis sativus]
Csa3G902190	945	90.59	188.49	1.0570642771855	Up	PLATZ	PLATZ	-	NA	NA	NA	NA	gi|700205243|gb|KGN60376.1|//hypothetical protein Csa_3G902190 [Cucumis sativus]
Csa1G572390	1827	9.52	19.57	1.03961027731886	Up	NAC	NAM	-	GO:0005634//nucleus	GO:0003677//DNA binding	GO:0006355//regulation of transcription, DNA-templated	K12581//CCR4-NOT transcription complex subunit 7/8;K13126//polyadenylate-binding protein;K05941//glutathione gamma-glutamylcysteinyltransferase [EC:2.3.2.15];K01054//acylglycerol lipase [EC:3.1.1.23]	gi|778662593|ref|XP_011659914.1|//PREDICTED: NAC transcription factor 25-like [Cucumis sativus]
Csa2G382490	2392	23.93	48.92	1.03160400698889	Up	HB	Homeobox,KNOX1,KNOX2	-	NA	NA	NA	K16670//homeobox protein Meis2;K15613//homeobox protein Meis1	gi|700207857|gb|KGN62976.1|//hypothetical protein Csa_2G382490 [Cucumis sativus];gi|778672603|ref|XP_011649837.1|//PREDICTED: homeobox protein knotted-1-like 3 isoform X2 [Cucumis sativus];gi|449441886|ref|XP_004138713.1|//PREDICTED: homeobox protein knotted-1-like 3 isoform X1 [Cucumis sativus]
Novel_G000326	1981	2.37	4.84	1.03011998837634	Up	mTERF	mTERF	-	NA	NA	NA	K15032//mTERF domain-containing protein, mitochondrial	gi|778704338|ref|XP_011655521.1|//PREDICTED: uncharacterized protein LOC101219984 [Cucumis sativus]
Csa3G523580	978	77.64	157.55	1.02093773119124	Up	NAC	NAM	-	NA	NA	NA	K13126//polyadenylate-binding protein;K05941//glutathione gamma-glutamylcysteinyltransferase [EC:2.3.2.15]	gi|449466123|ref|XP_004150776.1|//PREDICTED: NAC domain-containing protein 21/22-like isoform X1 [Cucumis sativus]
Csa3G750350	2629	3.28	6.63	1.0153130554945	Up	HSF	HSF_DNA-bind	-	GO:0005634//nucleus	GO:0043565//sequence-specific DNA binding;GO:0003700//transcription factor activity, sequence-specific DNA binding	GO:0006355//regulation of transcription, DNA-templated	K09419//heat shock transcription factor, other eukaryote	gi|778684107|ref|XP_011651989.1|//PREDICTED: heat stress transcription factor A-3 [Cucumis sativus]
Novel_G000318	1604	3.46	0.01	-8.43462822763672	Down	mTERF	mTERF	-	NA	NA	NA	K15032//mTERF domain-containing protein, mitochondrial	gi|659090428|ref|XP_008446011.1|//PREDICTED: uncharacterized protein LOC103488865 [Cucumis melo]
Csa7G169070	655	98.54	2.79	-5.142372444483	Down	MYB	Myb_DNA-binding	ARID,Response_reg,SNF2_N	GO:0043231//intracellular membrane-bounded organelle;GO:0005634//nucleus	GO:0003677//DNA binding;GO:0003676//nucleic acid binding	NA	K01184//polygalacturonase [EC:3.2.1.15];K09522//DnaJ homolog subfamily C member 2	gi|449466805|ref|XP_004151116.1|//PREDICTED: protein RADIALIS-like 1 [Cucumis sativus]
Csa7G168060	531	78.28	4.2	-4.28337634944788	Down	MYB	Myb_DNA-binding	ARID,Response_reg,SNF2_N	GO:0005634//nucleus	GO:0003677//DNA binding	NA	K01184//polygalacturonase [EC:3.2.1.15];K09522//DnaJ homolog subfamily C member 2	gi|778725452|ref|XP_011658943.1|//PREDICTED: protein RADIALIS-like 1 [Cucumis sativus]
Csa7G170600	726	42.58	4.76	-3.16114247114435	Down	MYB	Myb_DNA-binding	ARID,Response_reg,SNF2_N	GO:0005634//nucleus	GO:0003677//DNA binding;GO:0003676//nucleic acid binding	NA	K09522//DnaJ homolog subfamily C member 2;K01184//polygalacturonase [EC:3.2.1.15]	gi|778725458|ref|XP_004151125.2|//PREDICTED: protein RADIALIS-like 1 [Cucumis sativus]
Csa7G000020	291	30.5	4.56	-2.72025926143381	Down	MYB	Myb_DNA-binding	ARID,Response_reg,SNF2_N	NA	GO:0003676//nucleic acid binding	NA	K01184//polygalacturonase [EC:3.2.1.15]	gi|449466753|ref|XP_004151090.1|//PREDICTED: protein RADIALIS-like 3 [Cucumis sativus]
Csa4G629480	1080	3.89	0.82	-2.24607434036811	Down	NAC	NAM	-	NA	NA	NA	K00162//pyruvate dehydrogenase E1 component beta subunit [EC:1.2.4.1];K13126//polyadenylate-binding protein;K05941//glutathione gamma-glutamylcysteinyltransferase [EC:2.3.2.15]	gi|449456725|ref|XP_004146099.1|//PREDICTED: protein CUP-SHAPED COTYLEDON 2-like [Cucumis sativus]
Novel_G000437	772	15.19	3.5	-2.11769504266975	Down	MYB	Myb_DNA-binding	ARID,Response_reg,SNF2_N	GO:0005634//nucleus	GO:0003677//DNA binding	NA	NA	gi|778726246|ref|XP_011659078.1|//PREDICTED: protein RADIALIS-like 2 [Cucumis sativus]
Csa2G382550	495	9.39	2.17	-2.1134301152093	Down	AP2-EREBP	AP2	-	NA	NA	NA	K09286//EREBP-like factor	gi|449442154|ref|XP_004138847.1|//PREDICTED: ethylene-responsive transcription factor ERF003-like [Cucumis sativus]
Csa2G359980	877	6.1	1.41	-2.11311408005146	Down	ABI3VP1	B3	AP2,Auxin_resp	GO:0005634//nucleus	GO:0003677//DNA binding	GO:0006355//regulation of transcription, DNA-templated	NA	gi|449470057|ref|XP_004152735.1|//PREDICTED: B3 domain-containing protein At5g42700-like [Cucumis sativus]
Csa2G228420	1827	43.3	10.47	-2.04810558268328	Down	HSF	HSF_DNA-bind	-	GO:0005634//nucleus	GO:0043565//sequence-specific DNA binding;GO:0003700//transcription factor activity, sequence-specific DNA binding	GO:0006355//regulation of transcription, DNA-templated	K09419//heat shock transcription factor, other eukaryote	gi|449474405|ref|XP_004154162.1|//PREDICTED: heat stress transcription factor A-7a [Cucumis sativus]
Csa7G169590	3361	25.4	6.7	-2.04446614067694	Down	MYB	Myb_DNA-binding	ARID,Response_reg,SNF2_N	NA	GO:0003676//nucleic acid binding	NA	K03006//DNA-directed RNA polymerase II subunit RPB1 [EC:2.7.7.6];K01184//polygalacturonase [EC:3.2.1.15];K12447//UDP-sugar pyrophosphorylase [EC:2.7.7.64];K05658//ATP-binding cassette, subfamily B (MDR/TAP), member 1 [EC:3.6.3.44]	gi|700188845|gb|KGN44078.1|//hypothetical protein Csa_7G169590 [Cucumis sativus];gi|147768020|emb|CAN69396.1|//hypothetical protein VITISV_021034 [Vitis vinifera]
Csa2G367240	1498	11.16	2.82	-1.98456995943039	Down	E2F-DP	E2F_TDP	-	GO:0005634//nucleus;GO:0005667//transcription factor complex	GO:0003677//DNA binding;GO:0003700//transcription factor activity, sequence-specific DNA binding	GO:0006355//regulation of transcription, DNA-templated	K06620//transcription factor E2F3	gi|449470106|ref|XP_004152759.1|//PREDICTED: transcription factor E2FC isoform X1 [Cucumis sativus]
Csa3G122580	1003	6.62	1.7	-1.96129647066952	Down	LIM	LIM	-	NA	GO:0008270//zinc ion binding	NA	K09377//cysteine and glycine-rich protein	gi|449432173|ref|XP_004133874.1|//PREDICTED: LIM domain-containing protein PLIM2b-like [Cucumis sativus]
Csa4G631590	609	29.76	8.41	-1.82319682085289	Down	SBP	SBP	-	NA	NA	NA	K13415//protein brassinosteroid insensitive 1 [EC:2.7.10.1 2.7.11.1]	gi|449456643|ref|XP_004146058.1|//PREDICTED: squamosa promoter-binding protein 1 [Cucumis sativus]
Csa1G364460	753	7.11	2.5	-1.79422565011397	Down	AP2-EREBP	AP2	-	NA	NA	NA	K09286//EREBP-like factor	gi|778660525|ref|XP_004148719.2|//PREDICTED: ethylene-responsive transcription factor TINY-like [Cucumis sativus]
Csa3G850530	816	6.36	1.88	-1.75829410360672	Down	bHLH	HLH	-	NA	NA	NA	K10863//aprataxin [EC:3.-.-.-]	gi|449458249|ref|XP_004146860.1|//PREDICTED: transcription factor bHLH87-like [Cucumis sativus]
Csa4G009880	717	6.49	1.96	-1.72736482388393	Down	Tify	tify	GATA	NA	NA	GO:0050789//regulation of biological process;GO:0050896//response to stimulus;GO:0065007//biological regulation	K13464//jasmonate ZIM domain-containing protein	gi|449468880|ref|XP_004152149.1|//PREDICTED: protein TIFY 9 [Cucumis sativus]
Csa4G638510	690	12.21	3.76	-1.69925863330977	Down	MYB	Myb_DNA-binding	ARID,Response_reg,SNF2_N	NA	NA	NA	K09422//myb proto-oncogene protein, plant	gi|449446967|ref|XP_004141241.1|//PREDICTED: transcriptional activator Myb-like [Cucumis sativus]
Csa7G290470	2847	3.41	1.7	-1.67216094262303	Down	FHA	FHA	-	NA	NA	NA	K13216//nuclear inhibitor of protein phosphatase 1 [EC:3.1.4.-]	gi|778726389|ref|XP_004139758.2|//PREDICTED: uncharacterized protein LOC101215438 [Cucumis sativus]
Csa2G351740	885	33.22	10.5	-1.66166274540889	Down	MYB	Myb_DNA-binding	ARID,Response_reg,SNF2_N	NA	GO:0005488//binding	NA	K08869//aarF domain-containing kinase;K17613//calcineurin-binding protein cabin-1	gi|449450578|ref|XP_004143039.1|//PREDICTED: transcription factor MYB1R1-like [Cucumis sativus]
Csa1G570740	1041	15.56	4.96	-1.64943003459932	Down	bHLH	HLH	-	NA	NA	NA	K18485//myogenic factor 6	gi|778662547|ref|XP_004135630.2|//PREDICTED: transcription factor bHLH94 [Cucumis sativus]
Csa3G115040	774	24.7	7.97	-1.59458451248403	Down	C2C2-Dof	zf-Dof	-	NA	GO:0005488//binding	NA	K16222//Dof zinc finger protein DOF5.5	gi|449432966|ref|XP_004134269.1|//PREDICTED: dof zinc finger protein DOF5.7 [Cucumis sativus]
Csa3G146670	1386	7.9	2.39	-1.56877500925877	Down	OFP	Ovate	-	NA	NA	NA	K11855//ubiquitin carboxyl-terminal hydrolase 36/42 [EC:3.4.19.12]	gi|700201849|gb|KGN56982.1|//hypothetical protein Csa_3G146670 [Cucumis sativus]
Csa4G628890	1017	6.15	2.11	-1.54334341151942	Down	bZIP	bZIP_1,bZIP_2,bZIP_Maf	HLH	NA	NA	NA	NA	gi|778695798|ref|XP_004146037.2|//PREDICTED: basic leucine zipper 34 [Cucumis sativus]
Csa3G778370	504	16.23	5.59	-1.53774281170478	Down	OFP	Ovate	-	NA	NA	NA	K01870//isoleucyl-tRNA synthetase [EC:6.1.1.5]	gi|449437852|ref|XP_004136704.1|//PREDICTED: transcription repressor OFP6-like [Cucumis sativus]
Csa3G895680	684	52.18	19.18	-1.44389422379932	Down	AP2-EREBP	AP2	-	NA	NA	NA	K09286//EREBP-like factor	gi|449436878|ref|XP_004136219.1|//PREDICTED: ethylene-responsive transcription factor ERF043-like [Cucumis sativus]
Csa2G351640	1886	44.64	16.42	-1.44288290005138	Down	HSF	HSF_DNA-bind	-	GO:0005634//nucleus	GO:0003677//DNA binding;GO:0043565//sequence-specific DNA binding;GO:0003700//transcription factor activity, sequence-specific DNA binding	GO:0006355//regulation of transcription, DNA-templated;GO:0006351//transcription, DNA-templated	K09419//heat shock transcription factor, other eukaryote	gi|778670757|ref|XP_011649528.1|//PREDICTED: heat stress transcription factor A-2 [Cucumis sativus]
Csa6G157640	1719	6.38	2.55	-1.32305917690601	Down	G2-like	G2-like	Response_reg	GO:0005634//nucleus	GO:0003677//DNA binding	GO:0006355//regulation of transcription, DNA-templated	K12741//heterogeneous nuclear ribonucleoprotein A1/A3;K06236//collagen, type I, alpha;K14491//two-component response regulator ARR-B family;K14317//nuclear pore complex protein Nup214	gi|449466077|ref|XP_004150753.1|//PREDICTED: two-component response regulator ARR10-like isoform X1 [Cucumis sativus]
Csa2G372830	2332	14.86	6	-1.30839971004272	Down	Sigma70-like	Sigma70_r2,Sigma70_r3,Sigma70_r4	-	NA	GO:0003677//DNA binding;GO:0003700//transcription factor activity, sequence-specific DNA binding;GO:0016987//sigma factor activity	GO:0006355//regulation of transcription, DNA-templated;GO:0006352//DNA-templated transcription, initiation	K03093//RNA polymerase sigma factor	gi|778671949|ref|XP_004148429.2|//PREDICTED: RNA polymerase sigma factor sigC [Cucumis sativus]
Csa2G381650	477	16.76	6.87	-1.28664014488125	Down	bZIP	bZIP_1,bZIP_2,bZIP_Maf	HLH	GO:0043231//intracellular membrane-bounded organelle	GO:0003677//DNA binding;GO:0005515//protein binding;GO:0046914//transition metal ion binding;GO:0001071//nucleic acid binding transcription factor activity	GO:0006351//transcription, DNA-templated	K16241//transcription factor HY5	gi|663070919|ref|NP_001284656.1|//uncharacterized protein LOC103488299 [Cucumis melo]
Csa7G431340	1578	6.34	2.79	-1.18421771831022	Down	TUB	Tub	-	NA	NA	NA	K19600//tubby-related protein 1	gi|778728871|ref|XP_011659490.1|//PREDICTED: tubby-like protein 8 isoform X1 [Cucumis sativus];gi|449436213|ref|XP_004135888.1|//PREDICTED: tubby-like protein 8 isoform X2 [Cucumis sativus]
Csa6G075180	978	32.86	14.62	-1.16838916899764	Down	TCP	TCP	-	NA	NA	NA	K13035//beta-cyano-L-alanine hydratase/nitrilase [EC:3.5.5.4 4.2.1.65];K16221//transcription factor TCP21 (protein CCA1 HIKING EXPEDITION)	gi|449454616|ref|XP_004145050.1|//PREDICTED: transcription factor TCP9 [Cucumis sativus]
Csa1G467200	984	10.15	4.63	-1.1323956288123	Down	BES1	DUF822	-	NA	NA	NA	K14503//brassinosteroid resistant 1/2	gi|449459312|ref|XP_004147390.1|//PREDICTED: BES1/BZR1 homolog protein 4-like [Cucumis sativus]
Csa7G452370	2332	20.95	9.58	-1.12885268285053	Down	MYB	Myb_DNA-binding	ARID,Response_reg,SNF2_N	GO:0005634//nucleus	GO:0003677//DNA binding;GO:0060089//molecular transducer activity;GO:0016628//oxidoreductase activity, acting on the CH-CH group of donors, NAD or NADP as acceptor	GO:0007165//signal transduction;GO:0008152//metabolic process;GO:0006355//regulation of transcription, DNA-templated	K14490//histidine-containing phosphotransfer peotein	gi|449447821|ref|XP_004141666.1|//PREDICTED: histidine-containing phosphotransfer protein 4 [Cucumis sativus];gi|449447817|ref|XP_004141664.1|//PREDICTED: uncharacterized protein LOC101214316 [Cucumis sativus]
Csa6G051520	1296	12.59	5.82	-1.11318722481073	Down	EIL	EIN3	-	GO:0043231//intracellular membrane-bounded organelle	GO:0001071//nucleic acid binding transcription factor activity	GO:0010467//gene expression	K14514//ethylene-insensitive protein 3	gi|700190871|gb|KGN46075.1|//hypothetical protein Csa_6G051520 [Cucumis sativus]
Csa1G587970	978	18.98	8.8	-1.10890456349645	Down	C2C2-GATA	GATA	-	NA	NA	NA	K17894	gi|449436072|ref|XP_004135818.1|//PREDICTED: putative GATA transcription factor 22 [Cucumis sativus]
Csa6G094760	1784	20.74	9.69	-1.09784732339814	Down	SBP	SBP	-	GO:0005634//nucleus	GO:0003677//DNA binding	NA	K13415//protein brassinosteroid insensitive 1 [EC:2.7.10.1 2.7.11.1]	gi|449445550|ref|XP_004140535.1|//PREDICTED: squamosa promoter-binding-like protein 16 [Cucumis sativus]
Csa5G622830	1527	80.1	37.92	-1.07884327839781	Down	C2C2-GATA	GATA	-	GO:0005634//nucleus	GO:0043565//sequence-specific DNA binding;GO:0008270//zinc ion binding;GO:0005488//binding;GO:0003700//transcription factor activity, sequence-specific DNA binding	GO:0045893//positive regulation of transcription, DNA-templated	K19027//zinc finger FYVE domain-containing protein 26;K17895//GATA-binding protein 3;K17894	gi|449449346|ref|XP_004142426.1|//PREDICTED: GATA transcription factor 8 [Cucumis sativus]
Csa1G616330	1287	15.9	7.27	-1.05356553660709	Down	GRAS	GRAS	-	NA	NA	NA	K14494//DELLA protein	gi|700211419|gb|KGN66515.1|//hypothetical protein Csa_1G616330 [Cucumis sativus]
Csa3G354500	2230	68.45	33.33	-1.03822922403501	Down	Sigma70-like	Sigma70_r2,Sigma70_r3,Sigma70_r4	-	GO:0043231//intracellular membrane-bounded organelle;GO:0044444//cytoplasmic part	GO:0003677//DNA binding;GO:0003700//transcription factor activity, sequence-specific DNA binding;GO:0016987//sigma factor activity	GO:0016043//cellular component organization;GO:0006355//regulation of transcription, DNA-templated;GO:0006351//transcription, DNA-templated;GO:0006352//DNA-templated transcription, initiation	K03093//RNA polymerase sigma factor	gi|778680888|ref|XP_011651413.1|//PREDICTED: RNA polymerase sigma factor sigE, chloroplastic/mitochondrial [Cucumis sativus]
Csa6G108570	1669	58.55	28.61	-1.03314967306539	Down	bHLH	HLH	-	GO:0016021//integral component of membrane	GO:0046983//protein dimerization activity	NA	K16189//phytochrome-interacting factor 4;K12126//phytochrome-interacting factor 3	gi|778712228|ref|XP_011656866.1|//PREDICTED: transcription factor UNE10 [Cucumis sativus]
Csa2G361700	963	25.2	12.36	-1.01740304626145	Down	zf-HD	ZF-HD_dimer	-	NA	NA	NA	NA	gi|778671364|ref|XP_011649626.1|//PREDICTED: zinc-finger homeodomain protein 5 [Cucumis sativus]

## Sheet: B10_3 dpi
GeneID	Length	B10_0-Expression	B10_3-Expression	log2FoldChange(B10_3/B10_0)	Up/Down-Regulation	TF_family	Included_domain	Excluded_domain	Cellular Component	Molecular Function	Biological Process	Kegg Orthology	Nr Description
Csa3G180260	642	0.01	36.23	11.8229690904533	Up	AP2-EREBP	AP2	-	NA	NA	NA	K09286//EREBP-like factor	gi|449446069|ref|XP_004140794.1|//PREDICTED: dehydration-responsive element-binding protein 1A [Cucumis sativus]
Csa1G481720	468	0.01	16.78	10.7125270004398	Up	C2H2	zf-C2H2	PHD	NA	NA	NA	K14841//ribosome biogenesis protein NSA1	gi|700210574|gb|KGN65670.1|//hypothetical protein Csa_1G481720 [Cucumis sativus]
Csa7G022420	711	0.01	13.47	10.3955341354623	Up	NAC	NAM	-	NA	NA	NA	K13126//polyadenylate-binding protein	gi|700188082|gb|KGN43315.1|//hypothetical protein Csa_7G022420 [Cucumis sativus]
Csa3G822450	759	0.01	12.99	10.3431857154479	Up	HSF	HSF_DNA-bind	-	NA	NA	NA	K09419//heat shock transcription factor, other eukaryote	gi|449438018|ref|XP_004136787.1|//PREDICTED: heat stress transcription factor B-3-like [Cucumis sativus]
Csa6G055940	1215	0.01	8.62	9.7515440590891	Up	AP2-EREBP	AP2	-	NA	NA	NA	K09286//EREBP-like factor	gi|449446496|ref|XP_004141007.1|//PREDICTED: ethylene-responsive transcription factor ABR1-like [Cucumis sativus]
Csa5G155570	678	0.01	6.15	9.2644426002266	Up	AP2-EREBP	AP2	-	NA	NA	NA	K09286//EREBP-like factor	gi|449452372|ref|XP_004143933.1|//PREDICTED: dehydration-responsive element-binding protein 1E [Cucumis sativus]
Csa4G645310	1201	0.01	4.38	8.77478705960117	Up	MYB	Myb_DNA-binding	ARID,Response_reg,SNF2_N	NA	GO:0003677//DNA binding	NA	K09422//myb proto-oncogene protein, plant	gi|449447315|ref|XP_004141414.1|//PREDICTED: transcription factor RAX1-like [Cucumis sativus];gi|700200147|gb|KGN55305.1|//hypothetical protein Csa_4G645310 [Cucumis sativus]
Csa7G073700	771	0.01	4.31	8.7515440590891	Up	AP2-EREBP	AP2	-	NA	NA	NA	K09286//EREBP-like factor	gi|778725119|ref|XP_004137113.2|//PREDICTED: ethylene-responsive transcription factor ERF109-like [Cucumis sativus]
Novel_G000415	1209	0.01	3.64	8.5077946401987	Up	MYB	Myb_DNA-binding	ARID,Response_reg,SNF2_N	NA	NA	NA	K09422//myb proto-oncogene protein, plant	gi|449438468|ref|XP_004137010.1|//PREDICTED: transcription repressor MYB6-like [Cucumis sativus]
Csa3G354510	1101	0.01	2.24	7.8073549220576	Up	WRKY	WRKY	-	NA	NA	NA	K13425//WRKY transcription factor 22;K16225//probable WRKY transcription factor 52	gi|778680891|ref|XP_011651414.1|//PREDICTED: probable WRKY transcription factor 53 [Cucumis sativus]
Csa1G042350	1276	0.69	154.53	7.80707486866628	Up	MYB	Myb_DNA-binding	ARID,Response_reg,SNF2_N	NA	NA	NA	K09422//myb proto-oncogene protein, plant	gi|700209027|gb|KGN64123.1|//hypothetical protein Csa_1G042350 [Cucumis sativus];gi|449439407|ref|XP_004137477.1|//PREDICTED: transcription factor MYB108-like [Cucumis sativus]
Csa2G439230	1192	0.01	2.17	7.76155123244448	Up	MYB	Myb_DNA-binding	ARID,Response_reg,SNF2_N	NA	NA	NA	K09422//myb proto-oncogene protein, plant	gi|700208296|gb|KGN63415.1|//hypothetical protein Csa_2G439230 [Cucumis sativus]
Csa1G023580	1041	0.01	2	7.64385618977472	Up	NAC	NAM	-	NA	GO:0003676//nucleic acid binding	NA	K13126//polyadenylate-binding protein;K05941//glutathione gamma-glutamylcysteinyltransferase [EC:2.3.2.15]	gi|449440943|ref|XP_004138243.1|//PREDICTED: protein CUP-SHAPED COTYLEDON 1 [Cucumis sativus]
Csa7G407700	1731	0.01	1.81	7.49984588708321	Up	GRAS	GRAS	-	NA	NA	NA	K14494//DELLA protein	gi|449436743|ref|XP_004136152.1|//PREDICTED: DELLA protein RGL2 [Cucumis sativus]
Csa1G051580	893	0.01	1.77	7.467605550083	Up	MADS	SRF-TF	-	GO:0043231//intracellular membrane-bounded organelle;GO:0005634//nucleus	GO:0003677//DNA binding;GO:0003700//transcription factor activity, sequence-specific DNA binding;GO:0001071//nucleic acid binding transcription factor activity;GO:0046983//protein dimerization activity	GO:0006355//regulation of transcription, DNA-templated;GO:0006351//transcription, DNA-templated	K09264//MADS-box transcription factor, plant;K09260//MADS-box transcription enhancer factor 2A	gi|449454816|ref|XP_004145150.1|//PREDICTED: truncated transcription factor CAULIFLOWER D-like isoform X2 [Cucumis sativus]
Csa4G608170	1352	0.11	16.39	7.21916852046216	Up	NAC	NAM	-	NA	NA	NA	K12581//CCR4-NOT transcription complex subunit 7/8;K02437//glycine cleavage system H protein;K00162//pyruvate dehydrogenase E1 component beta subunit [EC:1.2.4.1];K13126//polyadenylate-binding protein;K01054//acylglycerol lipase [EC:3.1.1.23]	gi|449453868|ref|XP_004144678.1|//PREDICTED: transcription factor JUNGBRUNNEN 1 [Cucumis sativus];gi|700199783|gb|KGN54941.1|//hypothetical protein Csa_4G608170 [Cucumis sativus]
Csa2G174670	1371	0.45	37.24	6.37078426122912	Up	MYB	Myb_DNA-binding	ARID,Response_reg,SNF2_N	GO:0043231//intracellular membrane-bounded organelle	GO:0001071//nucleic acid binding transcription factor activity;GO:0003676//nucleic acid binding	GO:0009743//response to carbohydrate;GO:0006970//response to osmotic stress;GO:0009725//response to hormone;GO:0006351//transcription, DNA-templated;GO:0010038//response to metal ion	K09422//myb proto-oncogene protein, plant	gi|700206482|gb|KGN61601.1|//hypothetical protein Csa_2G174670 [Cucumis sativus];gi|449458822|ref|XP_004147145.1|//PREDICTED: myb-related protein Myb4-like [Cucumis sativus]
Csa3G207390	825	0.31	22.78	6.19935572132124	Up	AP2-EREBP	AP2	-	NA	NA	NA	K09286//EREBP-like factor	gi|449446085|ref|XP_004140802.1|//PREDICTED: ethylene-responsive transcription factor ERF109 [Cucumis sativus]
Csa4G012390	648	1.2	52.33	5.68099720164322	Up	WRKY	WRKY	-	NA	NA	NA	K18835//WRKY transcription factor 2;K13424//WRKY transcription factor 33	gi|778689952|ref|XP_004152302.2|//PREDICTED: probable WRKY transcription factor 75 [Cucumis sativus]
Csa6G486960	925	3.46	176.17	5.67005242046068	Up	FAR1	FAR1	-	NA	GO:0043565//sequence-specific DNA binding;GO:0003700//transcription factor activity, sequence-specific DNA binding	GO:0006355//regulation of transcription, DNA-templated	K18835//WRKY transcription factor 2;K13424//WRKY transcription factor 33	gi|449448420|ref|XP_004141964.1|//PREDICTED: probable WRKY transcription factor 51 [Cucumis sativus]
Csa2G406060	399	3.19	122.38	5.26166757006989	Up	WRKY	WRKY	-	NA	GO:0003677//DNA binding;GO:0001071//nucleic acid binding transcription factor activity	GO:0010467//gene expression	K18835//WRKY transcription factor 2;K13424//WRKY transcription factor 33	gi|778673213|ref|XP_004138624.2|//PREDICTED: probable WRKY transcription factor 45 [Cucumis sativus]
Csa5G608390	1071	0.48	16.77	5.12670447284319	Up	G2-like	G2-like	Response_reg	NA	NA	NA	K14491//two-component response regulator ARR-B family	gi|449434656|ref|XP_004135112.1|//PREDICTED: uncharacterized protein LOC101203539 [Cucumis sativus]
Csa3G731130	924	0.7	24.16	5.10912172238011	Up	Trihelix	trihelix	-	NA	NA	NA	NA	gi|778683209|ref|XP_004137715.2|//PREDICTED: trihelix transcription factor GT-3b [Cucumis sativus]
Csa1G597730	612	0.65	21.31	5.03494706475425	Up	AP2-EREBP	AP2	-	NA	NA	NA	K09286//EREBP-like factor	gi|449452608|ref|XP_004144051.1|//PREDICTED: ethylene-responsive transcription factor ERF017 [Cucumis sativus]
Csa1G589140	1739	0.31	9.95	5.00435640504414	Up	bHLH	HLH	-	NA	NA	NA	K13422//transcription factor MYC2	gi|778663004|ref|XP_011659992.1|//PREDICTED: putative transcription factor bHLH041 isoform X1 [Cucumis sativus];gi|700211160|gb|KGN66256.1|//hypothetical protein Csa_1G589140 [Cucumis sativus];gi|778663007|ref|XP_011659993.1|//PREDICTED: putative transcription factor bHLH041 isoform X2 [Cucumis sativus]
Csa2G177210	687	1.72	53.98	4.97194450676475	Up	AP2-EREBP	AP2	-	NA	NA	NA	K14516//ethylene-responsive transcription factor 1	gi|449466538|ref|XP_004150983.1|//PREDICTED: ethylene-responsive transcription factor 1B-like [Cucumis sativus]
Csa6G169310	903	0.14	3.64	4.70043971814109	Up	HSF	HSF_DNA-bind	-	NA	GO:0003677//DNA binding	GO:0006351//transcription, DNA-templated	K09419//heat shock transcription factor, other eukaryote	gi|449450958|ref|XP_004143229.1|//PREDICTED: heat stress transcription factor A-4d [Cucumis sativus]
Csa6G363560	462	1.19	27.97	4.55484677516825	Up	FAR1	FAR1	-	NA	NA	NA	K13424//WRKY transcription factor 33	gi|449453049|ref|XP_004144271.1|//PREDICTED: probable WRKY transcription factor 50 isoform X1 [Cucumis sativus]
Csa6G517310	594	0.45	9.64	4.42103623990029	Up	HSF	HSF_DNA-bind	-	NA	NA	NA	K09419//heat shock transcription factor, other eukaryote	gi|778720797|ref|XP_011658207.1|//PREDICTED: heat stress transcription factor B-2a-like [Cucumis sativus]
Csa6G139170	969	0.13	2.43	4.22437278546469	Up	NAC	NAM	-	NA	NA	NA	K02437//glycine cleavage system H protein;K13126//polyadenylate-binding protein	gi|449464660|ref|XP_004150047.1|//PREDICTED: transcription factor JUNGBRUNNEN 1-like [Cucumis sativus]
Csa1G088440	552	0.24	4.48	4.22239242133645	Up	LOB	DUF260	-	NA	NA	NA	K13944;K01227//mannosyl-glycoprotein endo-beta-N-acetylglucosaminidase [EC:3.2.1.96]	gi|449459128|ref|XP_004147298.1|//PREDICTED: LOB domain-containing protein 1-like [Cucumis sativus]
Csa3G567330	513	2.92	50.24	4.10479619001161	Up	WRKY	WRKY	-	NA	GO:0003677//DNA binding;GO:0001071//nucleic acid binding transcription factor activity	GO:0010467//gene expression	K18835//WRKY transcription factor 2;K13424//WRKY transcription factor 33	gi|659098396|ref|XP_008450119.1|//PREDICTED: probable WRKY transcription factor 75 [Cucumis melo]
Novel_G000156	2147	0.08	1.36	4.08746284125034	Up	mTERF	mTERF	-	NA	NA	NA	K15032//mTERF domain-containing protein, mitochondrial	gi|659076753|ref|XP_008438849.1|//PREDICTED: uncharacterized protein LOC103483822 isoform X1 [Cucumis melo]
Csa2G000420	1444	0.38	6.22	4.03284325668702	Up	bHLH	HLH	-	NA	NA	NA	K13422//transcription factor MYC2	gi|700205415|gb|KGN60534.1|//hypothetical protein Csa_2G000420 [Cucumis sativus];gi|659071355|ref|XP_008459381.1|//PREDICTED: putative transcription factor bHLH041 isoform X1 [Cucumis melo]
Csa5G209490	855	0.76	12.2	4.00473791900666	Up	MYB	Myb_DNA-binding	ARID,Response_reg,SNF2_N	NA	NA	NA	K09422//myb proto-oncogene protein, plant	gi|449460939|ref|XP_004148201.1|//PREDICTED: transcription factor MYB44-like [Cucumis sativus]
Csa2G382650	1083	7.65	121.78	3.99267366002456	Up	WRKY	WRKY	-	NA	GO:0003677//DNA binding;GO:0043565//sequence-specific DNA binding;GO:0003700//transcription factor activity, sequence-specific DNA binding;GO:0001071//nucleic acid binding transcription factor activity	GO:0010467//gene expression;GO:0006355//regulation of transcription, DNA-templated	K18835//WRKY transcription factor 2;K10268//F-box and leucine-rich repeat protein 2/20;K18834//WRKY transcription factor 1	gi|700207873|gb|KGN62992.1|//hypothetical protein Csa_2G382650 [Cucumis sativus];gi|525506965|ref|NP_001267528.1|//probable WRKY transcription factor 40-like [Cucumis sativus]
Csa1G132120	1128	0.45	7.2	3.96347412397489	Up	C2H2	zf-C2H2	PHD	NA	NA	NA	K09191//general transcription factor IIIA;K12309//beta-galactosidase [EC:3.2.1.23]	gi|700209755|gb|KGN64851.1|//hypothetical protein Csa_1G132120 [Cucumis sativus]
Csa3G727990	990	36.06	515.26	3.83682929751368	Up	WRKY	WRKY	-	NA	GO:0003677//DNA binding;GO:0001071//nucleic acid binding transcription factor activity	GO:0010467//gene expression	K18835//WRKY transcription factor 2;K13424//WRKY transcription factor 33;K16225//probable WRKY transcription factor 52	gi|700203548|gb|KGN58681.1|//WRKY transcription factor [Cucumis sativus]
Csa1G024160	1193	2.1	29.29	3.80194696021324	Up	MYB	Myb_DNA-binding	ARID,Response_reg,SNF2_N	NA	NA	NA	K09422//myb proto-oncogene protein, plant	gi|700208734|gb|KGN63830.1|//hypothetical protein Csa_1G024160 [Cucumis sativus];gi|449439539|ref|XP_004137543.1|//PREDICTED: myb-related protein 305-like [Cucumis sativus]
Csa3G119700	1014	11.47	155.43	3.76032769295541	Up	WRKY	WRKY	-	NA	NA	NA	K13425//WRKY transcription factor 22;K16225//probable WRKY transcription factor 52	gi|778676947|ref|XP_011650695.1|//PREDICTED: probable WRKY transcription factor 46 [Cucumis sativus]
Csa6G040640	861	3.6	48.13	3.7408676116352	Up	MYB	Myb_DNA-binding	ARID,Response_reg,SNF2_N	NA	NA	NA	K09422//myb proto-oncogene protein, plant	gi|778710158|ref|XP_004140978.2|//PREDICTED: transcription factor MYB108-like [Cucumis sativus]
Csa4G051470	1806	2.2	26.44	3.7102949787559	Up	WRKY	WRKY	-	NA	GO:0043565//sequence-specific DNA binding;GO:0003700//transcription factor activity, sequence-specific DNA binding	GO:0006355//regulation of transcription, DNA-templated	K18835//WRKY transcription factor 2;K13426//WRKY transcription factor 29;K13425//WRKY transcription factor 22;K16225//probable WRKY transcription factor 52	gi|449464068|ref|XP_004149751.1|//PREDICTED: probable WRKY transcription factor 41 [Cucumis sativus]
Csa2G297180	706	11.8	142.37	3.68361538922209	Up	FAR1	FAR1	-	NA	GO:0043565//sequence-specific DNA binding;GO:0003700//transcription factor activity, sequence-specific DNA binding	GO:0006355//regulation of transcription, DNA-templated	K18835//WRKY transcription factor 2;K13424//WRKY transcription factor 33	gi|700206975|gb|KGN62094.1|//hypothetical protein Csa_2G297180 [Cucumis sativus];gi|449461443|ref|XP_004148451.1|//PREDICTED: probable WRKY transcription factor 51 [Cucumis sativus]
Csa2G382540	528	0.77	9.68	3.65207669657969	Up	AP2-EREBP	AP2	-	NA	NA	GO:0050794//regulation of cellular process;GO:0010467//gene expression	K09286//EREBP-like factor	gi|449441876|ref|XP_004138708.1|//PREDICTED: ethylene-responsive transcription factor ERF003-like [Cucumis sativus]
Csa3G710870	928	4.74	59.38	3.6470181290884	Up	WRKY	WRKY	-	NA	GO:0003677//DNA binding;GO:0001071//nucleic acid binding transcription factor activity	GO:0010467//gene expression	K18835//WRKY transcription factor 2;K13424//WRKY transcription factor 33;K18834//WRKY transcription factor 1	gi|700203527|gb|KGN58660.1|//hypothetical protein Csa_3G710870 [Cucumis sativus]
Csa6G518170	693	1.71	21.12	3.62654160447256	Up	NAC	NAM	-	GO:0043231//intracellular membrane-bounded organelle	GO:0001071//nucleic acid binding transcription factor activity	NA	NA	gi|778720964|ref|XP_004134944.2|//PREDICTED: NAC domain-containing protein 8-like [Cucumis sativus]
Csa7G071440	762	3.8	36.18	3.55419015192634	Up	C2H2	zf-C2H2	PHD	NA	NA	NA	NA	gi|449438625|ref|XP_004137088.1|//PREDICTED: zinc finger protein ZAT10 [Cucumis sativus]
Csa1G009580	1989	0.74	8.58	3.5353804718706	Up	WRKY	WRKY	-	NA	GO:0043565//sequence-specific DNA binding;GO:0003700//transcription factor activity, sequence-specific DNA binding	GO:0006355//regulation of transcription, DNA-templated	K18835//WRKY transcription factor 2;K13424//WRKY transcription factor 33;K01892//histidyl-tRNA synthetase [EC:6.1.1.21];K18834//WRKY transcription factor 1	gi|778655906|ref|XP_011660002.1|//PREDICTED: probable WRKY transcription factor 61 isoform X2 [Cucumis sativus];gi|778655903|ref|XP_011659995.1|//PREDICTED: probable WRKY transcription factor 61 isoform X1 [Cucumis sativus]
Csa7G328830	891	6.94	75.8	3.44919028048019	Up	WRKY	WRKY	-	NA	GO:0003677//DNA binding;GO:0001071//nucleic acid binding transcription factor activity	GO:0010467//gene expression	K13425//WRKY transcription factor 22;K16225//probable WRKY transcription factor 52	gi|525507306|ref|NP_001267693.1|//probable WRKY transcription factor 46-like [Cucumis sativus]
Csa3G740800	1347	1.68	17.63	3.39149933654142	Up	MYB	Myb_DNA-binding	ARID,Response_reg,SNF2_N	NA	NA	NA	K09422//myb proto-oncogene protein, plant	gi|449440407|ref|XP_004137976.1|//PREDICTED: transcription factor RAX2 [Cucumis sativus];gi|700203855|gb|KGN58988.1|//hypothetical protein Csa_3G740800 [Cucumis sativus]
Csa5G223070	849	31.84	331.88	3.38174945027737	Up	WRKY	WRKY	-	NA	GO:0003677//DNA binding;GO:0001071//nucleic acid binding transcription factor activity	GO:0010467//gene expression	K18835//WRKY transcription factor 2;K16225//probable WRKY transcription factor 52	gi|700195571|gb|KGN50748.1|//hypothetical protein Csa_5G223070 [Cucumis sativus]
Csa6G091830	954	11.69	117.14	3.32488696457786	Up	AP2-EREBP	AP2	-	NA	NA	NA	K09286//EREBP-like factor	gi|700191206|gb|KGN46410.1|//hypothetical protein Csa_6G091830 [Cucumis sativus];gi|778722055|ref|XP_011658395.1|//PREDICTED: ethylene-responsive transcription factor ERF113 [Cucumis sativus]
Csa4G193250	993	2.45	24.9	3.2975807392359	Up	NAC	NAM	-	NA	GO:0003676//nucleic acid binding	NA	K00162//pyruvate dehydrogenase E1 component beta subunit [EC:1.2.4.1];K13126//polyadenylate-binding protein;K05941//glutathione gamma-glutamylcysteinyltransferase [EC:2.3.2.15]	gi|449459638|ref|XP_004147553.1|//PREDICTED: NAC domain-containing protein 100-like [Cucumis sativus]
Csa2G177220	381	0.75	6.84	3.18903382439002	Up	AP2-EREBP	AP2	-	NA	NA	NA	K09286//EREBP-like factor;K14516//ethylene-responsive transcription factor 1	gi|449455946|ref|XP_004145711.1|//PREDICTED: ethylene-responsive transcription factor ERF098-like [Cucumis sativus]
Csa6G452770	1031	0.62	5.61	3.17766065022192	Up	NAC	NAM	-	NA	NA	NA	K12581//CCR4-NOT transcription complex subunit 7/8;K13126//polyadenylate-binding protein	gi|700193072|gb|KGN48276.1|//hypothetical protein Csa_6G452770 [Cucumis sativus]
Csa6G518290	534	6.59	59.14	3.16578387311227	Up	AP2-EREBP	AP2	-	NA	NA	NA	K09286//EREBP-like factor;K13433//pathogenesis-related genes transcriptional activator PTI5;K14516//ethylene-responsive transcription factor 1	gi|778721013|ref|XP_004134941.2|//PREDICTED: pathogenesis-related genes transcriptional activator PTI5-like [Cucumis sativus]
Csa7G413890	831	2.3	18.15	3.16041791569794	Up	MYB	Myb_DNA-binding	ARID,Response_reg,SNF2_N	NA	NA	NA	K09422//myb proto-oncogene protein, plant	gi|778728329|ref|XP_004136147.2|//PREDICTED: transcription factor MYB108-like [Cucumis sativus]
Csa3G168410	972	0.53	4.58	3.11128333353374	Up	WRKY	WRKY	-	NA	NA	NA	K13424//WRKY transcription factor 33	gi|778679105|ref|XP_011651087.1|//PREDICTED: probable WRKY transcription factor 48 [Cucumis sativus]
Csa3G386830	1323	0.27	2.24	3.05246741989414	Up	MYB	Myb_DNA-binding	ARID,Response_reg,SNF2_N	GO:0043231//intracellular membrane-bounded organelle	GO:0003676//nucleic acid binding	NA	K09422//myb proto-oncogene protein, plant	gi|449468552|ref|XP_004151985.1|//PREDICTED: myb-related protein Myb4-like [Cucumis sativus];gi|700202777|gb|KGN57910.1|//hypothetical protein Csa_3G386830 [Cucumis sativus]
Csa2G354820	693	13.1	106.75	3.0265973529704	Up	C2H2	zf-C2H2	PHD	NA	NA	NA	NA	gi|700207337|gb|KGN62456.1|//hypothetical protein Csa_2G354820 [Cucumis sativus]
Novel_G000104	1047	2.8	22.16	2.98445914910422	Up	MYB	Myb_DNA-binding	ARID,Response_reg,SNF2_N	NA	NA	NA	K09422//myb proto-oncogene protein, plant	gi|778670368|ref|XP_004147356.2|//PREDICTED: myb-related protein 330-like [Cucumis sativus]
Csa4G614170	711	2.77	21.29	2.94221806840311	Up	G2-like	G2-like	Response_reg	NA	NA	NA	K12741//heterogeneous nuclear ribonucleoprotein A1/A3;K14491//two-component response regulator ARR-B family;K14317//nuclear pore complex protein Nup214	gi|778695370|ref|XP_011653983.1|//PREDICTED: uncharacterized protein LOC105435279 [Cucumis sativus]
Csa1G088450	498	1.37	10.33	2.91459245590453	Up	LOB	DUF260	-	NA	NA	NA	K13944;K01227//mannosyl-glycoprotein endo-beta-N-acetylglucosaminidase [EC:3.2.1.96];K14491//two-component response regulator ARR-B family	gi|700209659|gb|KGN64755.1|//hypothetical protein Csa_1G088450 [Cucumis sativus]
Csa7G407710	2905	1.27	9.49	2.90157959024894	Up	GRAS	GRAS	-	NA	NA	GO:0006355//regulation of transcription, DNA-templated	K14494//DELLA protein	gi|449436743|ref|XP_004136152.1|//PREDICTED: DELLA protein RGL2 [Cucumis sativus];gi|700189785|gb|KGN45018.1|//hypothetical protein Csa_7G407710 [Cucumis sativus]
Csa6G513530	1656	10.47	75.84	2.85669752196745	Up	WRKY	WRKY	-	NA	NA	NA	K10268//F-box and leucine-rich repeat protein 2/20;K13424//WRKY transcription factor 33	gi|700193885|gb|KGN49089.1|//hypothetical protein Csa_6G513530 [Cucumis sativus];gi|449433982|ref|XP_004134775.1|//PREDICTED: probable WRKY transcription factor 31 [Cucumis sativus]
Csa3G852470	960	15.9	109.18	2.85504389121973	Up	NAC	NAM	-	NA	NA	NA	K02437//glycine cleavage system H protein;K00162//pyruvate dehydrogenase E1 component beta subunit [EC:1.2.4.1];K13126//polyadenylate-binding protein;K05941//glutathione gamma-glutamylcysteinyltransferase [EC:2.3.2.15]	gi|449460145|ref|XP_004147806.1|//PREDICTED: NAC domain-containing protein 72-like isoform X2 [Cucumis sativus]
Csa4G630010	582	18.64	134.46	2.85070328957727	Up	AP2-EREBP	AP2	-	NA	NA	NA	K09286//EREBP-like factor	gi|449456627|ref|XP_004146050.1|//PREDICTED: ethylene-responsive transcription factor 4 [Cucumis sativus]
Csa6G495100	1392	0.36	2.58	2.84130225398094	Up	TAZ	zf-TAZ	PHD	GO:0043231//intracellular membrane-bounded organelle	GO:0000989//transcription factor activity, transcription factor binding;GO:0046914//transition metal ion binding;GO:0004468//lysine N-acetyltransferase activity, acting on acetyl phosphate as donor	GO:0006351//transcription, DNA-templated	K00517	gi|700193401|gb|KGN48605.1|//hypothetical protein Csa_6G495100 [Cucumis sativus]
Csa3G018320	1035	7.27	51.28	2.81836899269915	Up	AP2-EREBP	AP2	-	NA	NA	NA	K09286//EREBP-like factor	gi|449458980|ref|XP_004147224.1|//PREDICTED: ethylene-responsive transcription factor 6 [Cucumis sativus]
Csa6G522650	786	0.99	6.93	2.8073549220576	Up	WRKY	WRKY	-	NA	GO:0003677//DNA binding;GO:0001071//nucleic acid binding transcription factor activity	GO:0010467//gene expression	K18835//WRKY transcription factor 2;K08819//cyclin-dependent kinase 12/13 [EC:2.7.11.22 2.7.11.23]	gi|700194167|gb|KGN49371.1|//hypothetical protein Csa_6G522650 [Cucumis sativus]
Csa4G641590	450	5.85	40.42	2.78856079190897	Up	AP2-EREBP	AP2	-	GO:0043231//intracellular membrane-bounded organelle	GO:0001071//nucleic acid binding transcription factor activity;GO:0003676//nucleic acid binding	GO:0006351//transcription, DNA-templated	K09286//EREBP-like factor	gi|449447039|ref|XP_004141277.1|//PREDICTED: ethylene-responsive transcription factor ERF011-like [Cucumis sativus]
Csa7G047400	1194	0.32	2.17	2.76155123244448	Up	AP2-EREBP	AP2	-	NA	NA	NA	K09286//EREBP-like factor	gi|449438084|ref|XP_004136820.1|//PREDICTED: ethylene-responsive transcription factor ERF053 [Cucumis sativus]
Csa6G382950	891	19.96	133.28	2.73927668002829	Up	NAC	NAM	-	NA	GO:0003676//nucleic acid binding	NA	K02437//glycine cleavage system H protein;K13126//polyadenylate-binding protein;K00162//pyruvate dehydrogenase E1 component beta subunit [EC:1.2.4.1];K05941//glutathione gamma-glutamylcysteinyltransferase [EC:2.3.2.15]	gi|449464170|ref|XP_004149802.1|//PREDICTED: NAC domain-containing protein 2-like [Cucumis sativus]
Csa6G425720	594	1.12	7.34	2.71228133078561	Up	NAC	NAM	-	NA	NA	NA	K13126//polyadenylate-binding protein	gi|449444999|ref|XP_004140261.1|//PREDICTED: NAC domain-containing protein 90 [Cucumis sativus]
Csa7G353010	783	1.83	11.2	2.61358317866092	Up	NAC	NAM	-	NA	NA	NA	K13126//polyadenylate-binding protein;K05941//glutathione gamma-glutamylcysteinyltransferase [EC:2.3.2.15]	gi|778727061|ref|XP_011659202.1|//PREDICTED: NAC domain-containing protein 21/22-like [Cucumis sativus]
Csa3G730800	1431	8.42	51.21	2.6045334206825	Up	WRKY	WRKY	-	NA	GO:0003677//DNA binding;GO:0001071//nucleic acid binding transcription factor activity	GO:0010467//gene expression	K10268//F-box and leucine-rich repeat protein 2/20;K13424//WRKY transcription factor 33	gi|700203583|gb|KGN58716.1|//hypothetical protein Csa_3G730800 [Cucumis sativus]
Csa1G045480	2047	0.47	2.84	2.59515826782705	Up	WRKY	WRKY	-	NA	NA	NA	K18835//WRKY transcription factor 2;K13424//WRKY transcription factor 33	gi|449469657|ref|XP_004152535.1|//PREDICTED: probable WRKY transcription factor 61 [Cucumis sativus];gi|700209154|gb|KGN64250.1|//hypothetical protein Csa_1G045480 [Cucumis sativus]
Csa1G075060	636	4.8	26.39	2.45888503971775	Up	AP2-EREBP	AP2	-	NA	NA	NA	K09286//EREBP-like factor	gi|449457841|ref|XP_004146656.1|//PREDICTED: ethylene-responsive transcription factor 11 [Cucumis sativus]
Csa3G405510	2332	7.74	41.16	2.41083751074956	Up	GRAS	GRAS	-	NA	NA	GO:0006355//regulation of transcription, DNA-templated	K14494//DELLA protein	gi|449468516|ref|XP_004151967.1|//PREDICTED: scarecrow-like protein 21 [Cucumis sativus]
Csa5G165850	753	5.2	27.26	2.39020203377676	Up	AP2-EREBP	AP2	-	NA	NA	NA	K09286//EREBP-like factor	gi|449469359|ref|XP_004152388.1|//PREDICTED: ethylene-responsive transcription factor 1A-like [Cucumis sativus]
Csa6G499870	1131	13.2	67.7	2.37842638529672	Up	C2H2	zf-C2H2	PHD	NA	GO:0005488//binding	NA	K09201//transcription factor YY;K09191//general transcription factor IIIA;K12309//beta-galactosidase [EC:3.2.1.23]	gi|449451615|ref|XP_004143557.1|//PREDICTED: protein SENSITIVE TO PROTON RHIZOTOXICITY 1-like [Cucumis sativus]
Csa7G020910	852	4.4	22.55	2.35755200461808	Up	NAC	NAM	-	NA	NA	NA	K13126//polyadenylate-binding protein	gi|449454271|ref|XP_004144879.1|//PREDICTED: protein FEZ-like [Cucumis sativus]
Csa6G490870	873	21.88	110.85	2.34092412696211	Up	HSF	HSF_DNA-bind	-	NA	NA	NA	K09419//heat shock transcription factor, other eukaryote	gi|449448324|ref|XP_004141916.1|//PREDICTED: heat shock factor protein HSF24 [Cucumis sativus]
Csa1G572390	1827	9.52	47.21	2.31005900429605	Up	NAC	NAM	-	GO:0005634//nucleus	GO:0003677//DNA binding	GO:0006355//regulation of transcription, DNA-templated	K12581//CCR4-NOT transcription complex subunit 7/8;K13126//polyadenylate-binding protein;K05941//glutathione gamma-glutamylcysteinyltransferase [EC:2.3.2.15];K01054//acylglycerol lipase [EC:3.1.1.23]	gi|778662593|ref|XP_011659914.1|//PREDICTED: NAC transcription factor 25-like [Cucumis sativus]
Csa2G166180	1657	2.66	13.11	2.30116953472056	Up	VOZ	VOZ	-	NA	NA	NA	K10773//endonuclease III [EC:4.2.99.18]	gi|700206421|gb|KGN61540.1|//hypothetical protein Csa_2G166180 [Cucumis sativus]
Csa5G606310	873	31.34	153.13	2.28867986683248	Up	NAC	NAM	-	NA	NA	NA	K02437//glycine cleavage system H protein;K13126//polyadenylate-binding protein;K00162//pyruvate dehydrogenase E1 component beta subunit [EC:1.2.4.1];K05941//glutathione gamma-glutamylcysteinyltransferase [EC:2.3.2.15]	gi|449434768|ref|XP_004135168.1|//PREDICTED: NAC transcription factor 29-like [Cucumis sativus]
Csa7G049230	630	30.77	148.37	2.26960306375033	Up	AP2-EREBP	AP2	-	NA	NA	NA	K09286//EREBP-like factor	gi|449438123|ref|XP_004136839.1|//PREDICTED: ethylene-responsive transcription factor 4-like [Cucumis sativus]
CsaUNG031640	954	15.86	76.11	2.26269324908112	Up	AP2-EREBP	AP2	-	NA	NA	NA	K09287//RAV-like factor	gi|449466693|ref|XP_004151060.1|//PREDICTED: AP2/ERF and B3 domain-containing transcription factor RAV1-like [Cucumis sativus]
Csa3G017320	840	20.49	98.21	2.26094994666626	Up	AP2-EREBP	AP2	-	NA	NA	NA	K09286//EREBP-like factor	gi|449458984|ref|XP_004147226.1|//PREDICTED: ethylene-responsive transcription factor 2 [Cucumis sativus]
Csa5G175870	522	3.12	14.4	2.16992500144231	Up	LOB	DUF260	-	NA	NA	NA	K13944;K01227//mannosyl-glycoprotein endo-beta-N-acetylglucosaminidase [EC:3.2.1.96]	gi|700195287|gb|KGN50464.1|//hypothetical protein Csa_5G175870 [Cucumis sativus]
Csa1G025960	1731	25.68	111.23	2.11482884428382	Up	WRKY	WRKY	-	NA	NA	NA	K13424//WRKY transcription factor 33	gi|525507238|ref|NP_001267657.1|//uncharacterized protein LOC101207158 [Cucumis sativus]
Csa2G382490	2392	23.93	102.09	2.09294925514767	Up	HB	Homeobox,KNOX1,KNOX2	-	NA	NA	NA	K16670//homeobox protein Meis2;K15613//homeobox protein Meis1	gi|700207857|gb|KGN62976.1|//hypothetical protein Csa_2G382490 [Cucumis sativus];gi|778672603|ref|XP_011649837.1|//PREDICTED: homeobox protein knotted-1-like 3 isoform X2 [Cucumis sativus];gi|449441886|ref|XP_004138713.1|//PREDICTED: homeobox protein knotted-1-like 3 isoform X1 [Cucumis sativus]
Csa5G180920	546	11.37	47.86	2.07358814264625	Up	C2H2	zf-C2H2	PHD	NA	NA	NA	K14841//ribosome biogenesis protein NSA1	gi|449459930|ref|XP_004147699.1|//PREDICTED: zinc finger protein ZAT12-like [Cucumis sativus]
Csa7G049170	897	8.9	37.12	2.06031946927381	Up	WRKY	WRKY	-	NA	GO:0003677//DNA binding;GO:0001071//nucleic acid binding transcription factor activity	GO:0010467//gene expression	K13425//WRKY transcription factor 22	gi|525507180|ref|NP_001267628.1|//probable WRKY transcription factor 69-like [Cucumis sativus]
Csa6G190300	2155	8.51	33.6	1.98123019598016	Up	GRAS	GRAS	-	NA	NA	NA	K14494//DELLA protein	gi|449450910|ref|XP_004143205.1|//PREDICTED: scarecrow-like protein 34 [Cucumis sativus]
Csa3G181940	882	16.23	61.99	1.93337250409754	Up	HSF	HSF_DNA-bind	-	NA	NA	NA	K09419//heat shock transcription factor, other eukaryote	gi|449446047|ref|XP_004140783.1|//PREDICTED: heat stress transcription factor B-2b-like [Cucumis sativus]
Csa6G446400	678	7.19	26.98	1.90782667250897	Up	TCP	TCP	-	NA	NA	NA	K13035//beta-cyano-L-alanine hydratase/nitrilase [EC:3.5.5.4 4.2.1.65];K16221//transcription factor TCP21 (protein CCA1 HIKING EXPEDITION)	gi|700192975|gb|KGN48179.1|//hypothetical protein Csa_6G446400 [Cucumis sativus]
Csa4G664530	1056	27.68	103.19	1.8983873198693	Up	bZIP	bZIP_1,bZIP_2,bZIP_Maf	HLH	NA	NA	NA	NA	gi|778697290|ref|XP_011654291.1|//PREDICTED: bZIP transcription factor 60 [Cucumis sativus]
Csa7G433210	1408	3.2	11.24	1.81249822533356	Up	C3H	zf-CCCH	PHD,SNF2_N,zf-C2H2	NA	GO:0046872//metal ion binding	NA	NA	gi|449436118|ref|XP_004135841.1|//PREDICTED: zinc finger CCCH domain-containing protein 39-like isoform X1 [Cucumis sativus]
Csa1G425940	726	21.65	72.75	1.74858022306892	Up	bHLH	HLH	-	NA	NA	NA	K13422//transcription factor MYC2	gi|449457201|ref|XP_004146337.1|//PREDICTED: transcription factor bHLH35-like [Cucumis sativus]
Csa1G009870	1125	3.61	12.12	1.74731895658578	Up	NAC	NAM	-	NA	NA	NA	K00162//pyruvate dehydrogenase E1 component beta subunit [EC:1.2.4.1];K13126//polyadenylate-binding protein;K05941//glutathione gamma-glutamylcysteinyltransferase [EC:2.3.2.15]	gi|778655982|ref|XP_011660158.1|//PREDICTED: NAC domain-containing protein 100-like [Cucumis sativus]
Csa3G598900	1587	5.43	18.12	1.73855885224187	Up	bHLH	HLH	-	NA	NA	NA	K16190//glucuronokinase [EC:2.7.1.43];K13422//transcription factor MYC2	gi|778681821|ref|XP_011651587.1|//PREDICTED: transcription factor ICE1 [Cucumis sativus]
Csa3G630280	1584	5.4	16.66	1.72489276186563	Up	AP2-EREBP	AP2	-	GO:0005634//nucleus	GO:0003677//DNA binding;GO:0003700//transcription factor activity, sequence-specific DNA binding	GO:0006355//regulation of transcription, DNA-templated;GO:0007275//multicellular organism development	NA	gi|778682164|ref|XP_011651656.1|//PREDICTED: ethylene-responsive transcription factor-like protein At4g13040 isoform X1 [Cucumis sativus]
Csa5G167120	708	49.14	155.96	1.66620629703547	Up	AP2-EREBP	AP2	-	NA	NA	NA	K09286//EREBP-like factor	gi|778700301|ref|XP_004143677.2|//PREDICTED: ethylene-responsive transcription factor ERF105 [Cucumis sativus]
Csa6G290790	603	12.39	38.81	1.64725224564485	Up	LOB	DUF260	-	NA	NA	NA	K13944;K01227//mannosyl-glycoprotein endo-beta-N-acetylglucosaminidase [EC:3.2.1.96]	gi|449463671|ref|XP_004149555.1|//PREDICTED: LOB domain-containing protein 1-like [Cucumis sativus]
Csa3G645940	630	22.55	69.88	1.63175217477402	Up	Tify	tify	GATA	NA	NA	NA	K13464//jasmonate ZIM domain-containing protein	gi|449453375|ref|XP_004144433.1|//PREDICTED: protein TIFY 11A [Cucumis sativus]
Csa2G338830	900	86.71	266.49	1.61981110729419	Up	NAC	NAM	-	NA	GO:0003676//nucleic acid binding	NA	K02437//glycine cleavage system H protein;K00162//pyruvate dehydrogenase E1 component beta subunit [EC:1.2.4.1];K13126//polyadenylate-binding protein;K05941//glutathione gamma-glutamylcysteinyltransferase [EC:2.3.2.15]	gi|449459190|ref|XP_004147329.1|//PREDICTED: NAC domain-containing protein 2 [Cucumis sativus]
Csa4G639950	1637	7.6	23.34	1.6187332373764	Up	NAC	NAM	-	GO:0005634//nucleus	GO:0003677//DNA binding	GO:0006355//regulation of transcription, DNA-templated	K13126//polyadenylate-binding protein	gi|778696183|ref|XP_004141384.2|//PREDICTED: protein CUP-SHAPED COTYLEDON 3-like [Cucumis sativus]
Csa6G511040	696	61.97	188.2	1.60262475464429	Up	BBR/BPC	GAGA_bind	-	NA	GO:0043169//cation binding	GO:0006812//cation transport	NA	gi|778720120|ref|XP_004134803.2|//PREDICTED: protein PXR1-like [Cucumis sativus]
Novel_G000180	1889	4.27	12.85	1.58946038446075	Up	WRKY	WRKY	-	NA	GO:0043565//sequence-specific DNA binding;GO:0003700//transcription factor activity, sequence-specific DNA binding	GO:0006355//regulation of transcription, DNA-templated	K13424//WRKY transcription factor 33;K18834//WRKY transcription factor 1	gi|778681548|ref|XP_011651538.1|//PREDICTED: probable WRKY transcription factor 68 isoform X1 [Cucumis sativus]
Csa1G004900	1416	1.24	3.63	1.54962942760888	Up	MYB	Myb_DNA-binding	ARID,Response_reg,SNF2_N	NA	NA	NA	K09422//myb proto-oncogene protein, plant	gi|700208478|gb|KGN63574.1|//hypothetical protein Csa_1G004900 [Cucumis sativus]
Csa2G327500	1668	43.59	127.37	1.54695640467751	Up	NAC	NAM	-	NA	NA	NA	K13459//disease resistance protein RPS2;K13126//polyadenylate-binding protein	gi|449465328|ref|XP_004150380.1|//PREDICTED: NAC domain-containing protein 78-like isoform X2 [Cucumis sativus]
Csa1G005660	561	12.47	36.42	1.54626945714717	Up	LIM	LIM	-	NA	GO:0046914//transition metal ion binding	NA	K09377//cysteine and glycine-rich protein	gi|449440708|ref|XP_004138126.1|//PREDICTED: LIM domain-containing protein WLIM1-like [Cucumis sativus]
Csa4G166950	870	9.79	26.37	1.42951680626087	Up	C2H2	zf-C2H2	PHD	GO:0044464//cell part	GO:0046914//transition metal ion binding	NA	NA	gi|700198693|gb|KGN53851.1|//hypothetical protein Csa_4G166950 [Cucumis sativus]
Csa6G014640	3932	27.68	73.33	1.40555959640376	Up	C2C2-YABBY	YABBY	-	NA	NA	NA	K12472//epidermal growth factor receptor substrate 15	gi|778709716|ref|XP_011656443.1|//PREDICTED: uncharacterized protein LOC105435747 [Cucumis sativus]
Csa1G168870	1101	4.85	12.75	1.39444059467173	Up	NAC	NAM	-	NA	NA	NA	K13126//polyadenylate-binding protein	gi|449443648|ref|XP_004139589.1|//PREDICTED: protein NTM1-like 8 isoform X1 [Cucumis sativus]
Csa3G865440	1089	2.78	7.26	1.38488466527224	Up	MADS	SRF-TF	-	GO:0043231//intracellular membrane-bounded organelle;GO:0005634//nucleus	GO:0003677//DNA binding;GO:0003700//transcription factor activity, sequence-specific DNA binding;GO:0001071//nucleic acid binding transcription factor activity;GO:0046983//protein dimerization activity	GO:0006355//regulation of transcription, DNA-templated;GO:0006351//transcription, DNA-templated	K09264//MADS-box transcription factor, plant	gi|700204876|gb|KGN60009.1|//hypothetical protein Csa_3G865440 [Cucumis sativus];gi|778686714|ref|XP_011652440.1|//PREDICTED: floral homeotic protein DEFICIENS [Cucumis sativus]
Csa3G062590	1779	19.6	51.08	1.38190487070015	Up	NAC	NAM	-	GO:0005634//nucleus;GO:0016021//integral component of membrane	GO:0003677//DNA binding	GO:0006355//regulation of transcription, DNA-templated	K12581//CCR4-NOT transcription complex subunit 7/8;K13126//polyadenylate-binding protein;K01054//acylglycerol lipase [EC:3.1.1.23]	gi|778675916|ref|XP_004149581.2|//PREDICTED: protein NTM1-like 8 isoform X2 [Cucumis sativus];gi|778675913|ref|XP_011650496.1|//PREDICTED: protein NTM1-like 8 isoform X1 [Cucumis sativus]
Csa6G519620	1477	4.5	11.72	1.38097566320521	Up	G2-like	G2-like	Response_reg	GO:0005634//nucleus	GO:0003677//DNA binding	GO:0006355//regulation of transcription, DNA-templated	K12741//heterogeneous nuclear ribonucleoprotein A1/A3;K06236//collagen, type I, alpha;K14491//two-component response regulator ARR-B family;K14317//nuclear pore complex protein Nup214	gi|778721124|ref|XP_011658250.1|//PREDICTED: myb-like protein H isoform X1 [Cucumis sativus]
Csa4G038810	1218	19.72	50.53	1.35748062824004	Up	C2H2	zf-C2H2	PHD	NA	NA	NA	K12309//beta-galactosidase [EC:3.2.1.23]	gi|449462892|ref|XP_004149169.1|//PREDICTED: protein indeterminate-domain 1-like [Cucumis sativus]
Csa1G042290	2106	25.2	63.55	1.3448103357265	Up	AP2-EREBP	AP2	-	GO:0005634//nucleus	GO:0003677//DNA binding;GO:0003700//transcription factor activity, sequence-specific DNA binding	GO:0006355//regulation of transcription, DNA-templated	K13434//pathogenesis-related genes transcriptional activator PTI6	gi|449439397|ref|XP_004137472.1|//PREDICTED: ethylene-responsive transcription factor CRF3-like [Cucumis sativus]
Csa6G511620	1626	13.8	33.13	1.34077566258293	Up	GRAS	GRAS	-	NA	NA	NA	K14494//DELLA protein	gi|449434034|ref|XP_004134801.1|//PREDICTED: scarecrow-like protein 13 [Cucumis sativus]
Csa2G445270	1124	22.1	55.95	1.34009176158496	Up	PLATZ	PLATZ	-	NA	NA	NA	NA	gi|449460690|ref|XP_004148078.1|//PREDICTED: uncharacterized protein LOC101216747 [Cucumis sativus]
Csa2G006070	1044	2.57	6.49	1.33645011880526	Up	C3H	zf-CCCH	PHD,SNF2_N,zf-C2H2	NA	GO:0005488//binding	NA	K18753//butyrate response factor 1;K15308//tristetraprolin	gi|449443305|ref|XP_004139420.1|//PREDICTED: zinc finger CCCH domain-containing protein 39-like [Cucumis sativus]
Csa2G428380	882	24.27	59.75	1.29976460460434	Up	WRKY	WRKY	-	NA	GO:0003677//DNA binding;GO:0001071//nucleic acid binding transcription factor activity	GO:0010467//gene expression	K13425//WRKY transcription factor 22;K13424//WRKY transcription factor 33	gi|525507250|ref|NP_001267663.1|//probable WRKY transcription factor 15-like [Cucumis sativus]
Csa7G103280	1886	1.65	4.4	1.29188926850598	Up	C3H	zf-CCCH	PHD,SNF2_N,zf-C2H2	NA	NA	NA	K18753//butyrate response factor 1;K15308//tristetraprolin	gi|700188780|gb|KGN44013.1|//hypothetical protein Csa_7G103280 [Cucumis sativus];gi|449462413|ref|XP_004148935.1|//PREDICTED: uncharacterized protein LOC101215865 [Cucumis sativus]
Csa5G523000	2051	3.26	7.85	1.26782068954791	Up	NAC	NAM	-	GO:0005634//nucleus	GO:0003677//DNA binding	GO:0006355//regulation of transcription, DNA-templated	NA	gi|778703598|ref|XP_011655393.1|//PREDICTED: NAC domain-containing protein 8 [Cucumis sativus]
Csa4G361820	888	53.13	124.42	1.22761979344217	Up	NAC	NAM	-	NA	GO:0003676//nucleic acid binding	NA	K02437//glycine cleavage system H protein;K00162//pyruvate dehydrogenase E1 component beta subunit [EC:1.2.4.1];K13126//polyadenylate-binding protein;K05941//glutathione gamma-glutamylcysteinyltransferase [EC:2.3.2.15]	gi|449449759|ref|XP_004142632.1|//PREDICTED: NAC domain-containing protein 2-like [Cucumis sativus]
Csa7G322070	1713	15.6	35.13	1.22198180655044	Up	GRAS	GRAS	-	NA	NA	NA	K14777//ATP-dependent RNA helicase DDX47/RRP3 [EC:3.6.4.13];K14494//DELLA protein	gi|449443762|ref|XP_004139646.1|//PREDICTED: scarecrow-like protein 1 [Cucumis sativus]
Csa3G119420	516	6.58	15.3	1.21737216384477	Up	C2C2-Dof	zf-Dof	-	NA	NA	NA	K16222//Dof zinc finger protein DOF5.5	gi|778676830|ref|XP_011650669.1|//PREDICTED: dof zinc finger protein DOF3.7 [Cucumis sativus]
Csa1G426980	846	19.27	44.2	1.19768979798307	Up	WRKY	WRKY	-	NA	GO:0003677//DNA binding;GO:0001071//nucleic acid binding transcription factor activity	GO:0010467//gene expression	K13425//WRKY transcription factor 22	gi|700210401|gb|KGN65497.1|//hypothetical protein Csa_1G426980 [Cucumis sativus]
Csa7G043020	1578	17.34	38.32	1.14399366251435	Up	WRKY	WRKY	-	NA	NA	NA	K13424//WRKY transcription factor 33	gi|778723759|ref|XP_011658698.1|//PREDICTED: probable WRKY transcription factor 31 [Cucumis sativus]
Csa1G076100	933	7.71	17.2	1.14242827177093	Up	NAC	NAM	-	NA	NA	NA	NA	gi|778658830|ref|XP_011653355.1|//PREDICTED: NAC domain-containing protein 8-like [Cucumis sativus]
Csa6G491080	885	27.1	56.41	1.05765808536363	Up	WRKY	WRKY	-	NA	NA	NA	K13425//WRKY transcription factor 22	gi|449448302|ref|XP_004141905.1|//PREDICTED: probable WRKY transcription factor 15 [Cucumis sativus]
Csa3G736950	676	113.13	233.89	1.04784862406522	Up	S1Fa-like	S1FA	-	GO:0005634//nucleus;GO:0016021//integral component of membrane	GO:0003677//DNA binding	GO:0006355//regulation of transcription, DNA-templated	NA	gi|449440079|ref|XP_004137812.1|//PREDICTED: DNA-binding protein S1FA-like [Cucumis sativus]
Csa4G314390	1119	17.37	35.86	1.04577773415798	Up	AP2-EREBP	AP2	-	NA	NA	NA	K09286//EREBP-like factor	gi|449461791|ref|XP_004148625.1|//PREDICTED: dehydration-responsive element-binding protein 2A-like [Cucumis sativus]
Csa6G012810	1612	12.69	26	1.03481955407471	Up	AP2-EREBP	AP2	-	GO:0005634//nucleus	GO:0003677//DNA binding;GO:0003700//transcription factor activity, sequence-specific DNA binding	GO:0006355//regulation of transcription, DNA-templated	K09286//EREBP-like factor	gi|778709569|ref|XP_011656418.1|//PREDICTED: dehydration-responsive element-binding protein 2C isoform X1 [Cucumis sativus];gi|449441576|ref|XP_004138558.1|//PREDICTED: dehydration-responsive element-binding protein 2C isoform X2 [Cucumis sativus]
Csa6G518040	741	131.28	268.96	1.03474448572245	Up	AP2-EREBP	AP2	-	NA	NA	NA	K09286//EREBP-like factor	gi|525506959|ref|NP_001267525.1|//ethylene-responsive transcription factor 4-like [Cucumis sativus]
Csa6G091850	1068	7.87	15.97	1.02092877190375	Up	Trihelix	trihelix	-	NA	NA	NA	NA	gi|449445594|ref|XP_004140557.1|//PREDICTED: uncharacterized protein LOC101222632 isoform X1 [Cucumis sativus]
Csa3G011620	1986	53.81	108.6	1.01307789123695	Up	bHLH	HLH	-	NA	NA	NA	K13422//transcription factor MYC2	gi|449462019|ref|XP_004148739.1|//PREDICTED: transcription factor MYC2-like [Cucumis sativus]
Csa2G251490	1513	73.09	147.47	1.01267555644316	Up	C2C2-GATA	GATA	-	GO:0005634//nucleus	GO:0043565//sequence-specific DNA binding;GO:0008270//zinc ion binding;GO:0003700//transcription factor activity, sequence-specific DNA binding	GO:0045893//positive regulation of transcription, DNA-templated	K19027//zinc finger FYVE domain-containing protein 26;K17895//GATA-binding protein 3;K17894	gi|449464846|ref|XP_004150140.1|//PREDICTED: GATA transcription factor 5-like [Cucumis sativus]
Csa1G023060	735	19.58	39.44	1.01027878677422	Up	LOB	DUF260	-	NA	NA	NA	NA	gi|449440939|ref|XP_004138241.1|//PREDICTED: LOB domain-containing protein 41-like [Cucumis sativus]
Csa3G734180	2283	2.43	0.01	-7.92481250360578	Down	GRAS	GRAS	-	NA	NA	NA	K14494//DELLA protein	gi|449440329|ref|XP_004137937.1|//PREDICTED: scarecrow-like protein 9 [Cucumis sativus]
Csa5G466880	1575	2.23	0.01	-7.8008998999203	Down	mTERF	mTERF	-	NA	NA	NA	K15032//mTERF domain-containing protein, mitochondrial	gi|449452140|ref|XP_004143818.1|//PREDICTED: uncharacterized protein LOC101216006 [Cucumis sativus]
Csa5G609670	1212	1.45	0.01	-7.17990909001493	Down	C2C2-CO-like	CCT,zf-B_box	GATA,PLATZ	NA	NA	NA	K12135//zinc finger protein CONSTANS	gi|778705989|ref|XP_004135402.2|//PREDICTED: zinc finger protein CONSTANS-LIKE 6-like [Cucumis sativus]
Novel_G000318	1604	3.46	0.22	-3.97519660899943	Down	mTERF	mTERF	-	NA	NA	NA	K15032//mTERF domain-containing protein, mitochondrial	gi|659090428|ref|XP_008446011.1|//PREDICTED: uncharacterized protein LOC103488865 [Cucumis melo]
Csa3G165690	1178	2.15	0.19	-3.50026533614587	Down	MYB	Myb_DNA-binding	ARID,Response_reg,SNF2_N	NA	NA	NA	K09422//myb proto-oncogene protein, plant	gi|700202019|gb|KGN57152.1|//hypothetical protein Csa_3G165690 [Cucumis sativus];gi|449433427|ref|XP_004134499.1|//PREDICTED: myb-related protein 308 [Cucumis sativus]
Novel_G000152	1657	1.69	0.21	-3.00856201350342	Down	mTERF	mTERF	-	NA	NA	NA	K15032//mTERF domain-containing protein, mitochondrial	gi|778678824|ref|XP_004134480.2|//PREDICTED: uncharacterized protein LOC101209260 [Cucumis sativus]
Csa5G157220	783	4.99	0.68	-2.87543316408692	Down	bHLH	HLH	-	NA	NA	NA	K18486//heart-and neural crest derivatives-expressed protein 2	gi|449459720|ref|XP_004147594.1|//PREDICTED: transcription factor bHLH36-like [Cucumis sativus]
Csa2G408970	894	3.3	0.44	-2.78374236483565	Down	NAC	NAM	-	NA	NA	NA	NA	gi|778673371|ref|XP_004138789.2|//PREDICTED: NAC domain-containing protein 8-like [Cucumis sativus]
Csa5G156220	756	4.49	0.71	-2.66082451523646	Down	bHLH	HLH	-	NA	NA	NA	K18486//heart-and neural crest derivatives-expressed protein 2	gi|821595469|ref|NP_001295816.1|//transcription factor bHLH118-like [Cucumis sativus]
Csa6G157640	1719	6.38	1.5	-2.60316709609875	Down	G2-like	G2-like	Response_reg	GO:0005634//nucleus	GO:0003677//DNA binding	GO:0006355//regulation of transcription, DNA-templated	K12741//heterogeneous nuclear ribonucleoprotein A1/A3;K06236//collagen, type I, alpha;K14491//two-component response regulator ARR-B family;K14317//nuclear pore complex protein Nup214	gi|449466077|ref|XP_004150753.1|//PREDICTED: two-component response regulator ARR10-like isoform X1 [Cucumis sativus]
Csa3G778370	504	16.23	2.76	-2.5559228277698	Down	OFP	Ovate	-	NA	NA	NA	K01870//isoleucyl-tRNA synthetase [EC:6.1.1.5]	gi|449437852|ref|XP_004136704.1|//PREDICTED: transcription repressor OFP6-like [Cucumis sativus]
Csa4G124910	1035	134.99	23.44	-2.52580806214578	Down	C2C2-CO-like	CCT,zf-B_box	GATA,PLATZ	NA	NA	NA	K12135//zinc finger protein CONSTANS	gi|449438975|ref|XP_004137263.1|//PREDICTED: zinc finger protein CONSTANS-LIKE 2-like [Cucumis sativus]
Csa1G011540	1332	3.21	0.58	-2.46844849199473	Down	bHLH	HLH	-	NA	NA	NA	K16189//phytochrome-interacting factor 4;K12126//phytochrome-interacting factor 3	gi|778656018|ref|XP_004138310.2|//PREDICTED: transcription factor UNE10 [Cucumis sativus];gi|700208606|gb|KGN63702.1|//hypothetical protein Csa_1G011540 [Cucumis sativus]
Csa6G039540	1005	48.21	9.62	-2.32522363062621	Down	C2C2-CO-like	CCT,zf-B_box	GATA,PLATZ	GO:0044464//cell part	GO:0046914//transition metal ion binding	NA	K12130//pseudo-response regulator 5;K12135//zinc finger protein CONSTANS	gi|449446203|ref|XP_004140861.1|//PREDICTED: zinc finger protein CONSTANS-LIKE 6 [Cucumis sativus]
Novel_G000084	993	135.01	27.91	-2.274212240101	Down	bHLH	HLH	-	NA	NA	NA	K13422//transcription factor MYC2	gi|778667623|ref|XP_011648963.1|//PREDICTED: transcription factor bHLH35-like [Cucumis sativus]
Csa6G103520	928	6.46	1.61	-2.00447347657931	Down	C2C2-Dof	zf-Dof	-	NA	GO:0003677//DNA binding;GO:0005488//binding	GO:0006355//regulation of transcription, DNA-templated	K16222//Dof zinc finger protein DOF5.5	gi|449445517|ref|XP_004140519.1|//PREDICTED: dof zinc finger protein DOF3.7-like [Cucumis sativus]
Csa1G573650	1137	10.49	2.62	-2.00137596103982	Down	bZIP	bZIP_1,bZIP_2,bZIP_Maf	HLH	NA	NA	NA	K09060//plant G-box-binding factor;K14432//ABA responsive element binding factor	gi|449435740|ref|XP_004135652.1|//PREDICTED: light-inducible protein CPRF2-like [Cucumis sativus]
Csa3G850530	816	6.36	1.62	-1.97303295239973	Down	bHLH	HLH	-	NA	NA	NA	K10863//aprataxin [EC:3.-.-.-]	gi|449458249|ref|XP_004146860.1|//PREDICTED: transcription factor bHLH87-like [Cucumis sativus]
Csa4G628890	1017	6.15	1.67	-1.88073830775255	Down	bZIP	bZIP_1,bZIP_2,bZIP_Maf	HLH	NA	NA	NA	NA	gi|778695798|ref|XP_004146037.2|//PREDICTED: basic leucine zipper 34 [Cucumis sativus]
Csa3G901180	966	11.28	3.12	-1.85414913353655	Down	bHLH	HLH	-	NA	NA	NA	K18485//myogenic factor 6;K13422//transcription factor MYC2	gi|449436822|ref|XP_004136191.1|//PREDICTED: transcription factor bHLH71 [Cucumis sativus]
Csa4G631590	609	29.76	8.7	-1.77428722037194	Down	SBP	SBP	-	NA	NA	NA	K13415//protein brassinosteroid insensitive 1 [EC:2.7.10.1 2.7.11.1]	gi|449456643|ref|XP_004146058.1|//PREDICTED: squamosa promoter-binding protein 1 [Cucumis sativus]
Csa3G115040	774	24.7	7.5	-1.77154097918834	Down	C2C2-Dof	zf-Dof	-	NA	GO:0005488//binding	NA	K16222//Dof zinc finger protein DOF5.5	gi|449432966|ref|XP_004134269.1|//PREDICTED: dof zinc finger protein DOF5.7 [Cucumis sativus]
Csa7G168060	531	78.28	24.17	-1.69542628286122	Down	MYB	Myb_DNA-binding	ARID,Response_reg,SNF2_N	GO:0005634//nucleus	GO:0003677//DNA binding	NA	K01184//polygalacturonase [EC:3.2.1.15];K09522//DnaJ homolog subfamily C member 2	gi|778725452|ref|XP_011658943.1|//PREDICTED: protein RADIALIS-like 1 [Cucumis sativus]
Csa3G622450	3641	18.79	5.88	-1.67607700658369	Down	bHLH	HLH	-	NA	GO:0046983//protein dimerization activity	NA	K16189//phytochrome-interacting factor 4;K12126//phytochrome-interacting factor 3	gi|778682039|ref|XP_011651631.1|//PREDICTED: transcription factor PIF1-like [Cucumis sativus]
Csa7G000020	291	30.5	9.45	-1.66897875649011	Down	MYB	Myb_DNA-binding	ARID,Response_reg,SNF2_N	NA	GO:0003676//nucleic acid binding	NA	K01184//polygalacturonase [EC:3.2.1.15]	gi|449466753|ref|XP_004151090.1|//PREDICTED: protein RADIALIS-like 3 [Cucumis sativus]
Csa3G895680	684	52.18	16.51	-1.66015682390419	Down	AP2-EREBP	AP2	-	NA	NA	NA	K09286//EREBP-like factor	gi|449436878|ref|XP_004136219.1|//PREDICTED: ethylene-responsive transcription factor ERF043-like [Cucumis sativus]
Csa3G843820	873	22.77	7.25	-1.65108139123433	Down	C2C2-GATA	GATA	-	NA	NA	NA	K17894	gi|449446764|ref|XP_004141141.1|//PREDICTED: GATA transcription factor 9-like [Cucumis sativus]
Novel_G000155	1707	3.84	1.25	-1.61917821605907	Down	mTERF	mTERF	-	NA	NA	NA	K15032//mTERF domain-containing protein, mitochondrial	gi|659076753|ref|XP_008438849.1|//PREDICTED: uncharacterized protein LOC103483822 isoform X1 [Cucumis melo]
Csa3G113370	1299	26.49	8.63	-1.61801537919067	Down	NAC	NAM	-	NA	NA	NA	K13126//polyadenylate-binding protein	gi|778676468|ref|XP_011650588.1|//PREDICTED: NAC domain-containing protein 55 [Cucumis sativus]
Csa2G374590	696	34.57	11.57	-1.57913173915491	Down	AP2-EREBP	AP2	-	NA	NA	NA	K09286//EREBP-like factor	gi|778672054|ref|XP_004150289.2|//PREDICTED: ethylene-responsive transcription factor TINY-like [Cucumis sativus]
Csa3G146670	1386	7.9	2.39	-1.56877500925877	Down	OFP	Ovate	-	NA	NA	NA	K11855//ubiquitin carboxyl-terminal hydrolase 36/42 [EC:3.4.19.12]	gi|700201849|gb|KGN56982.1|//hypothetical protein Csa_3G146670 [Cucumis sativus]
Csa6G497260	1029	27.95	9.5	-1.55684886451224	Down	bHLH	HLH	-	NA	NA	NA	K16190//glucuronokinase [EC:2.7.1.43];K13422//transcription factor MYC2	gi|778718916|ref|XP_004143539.2|//PREDICTED: transcription factor bHLH93 isoform X2 [Cucumis sativus]
Csa7G169070	655	98.54	33.58	-1.55310724137515	Down	MYB	Myb_DNA-binding	ARID,Response_reg,SNF2_N	GO:0043231//intracellular membrane-bounded organelle;GO:0005634//nucleus	GO:0003677//DNA binding;GO:0003676//nucleic acid binding	NA	K01184//polygalacturonase [EC:3.2.1.15];K09522//DnaJ homolog subfamily C member 2	gi|449466805|ref|XP_004151116.1|//PREDICTED: protein RADIALIS-like 1 [Cucumis sativus]
Csa2G004690	915	124.27	42.66	-1.54252218686221	Down	HSF	HSF_DNA-bind	-	NA	NA	NA	K09419//heat shock transcription factor, other eukaryote	gi|449443329|ref|XP_004139432.1|//PREDICTED: heat stress transcription factor C-1 [Cucumis sativus]
Csa7G169590	3361	25.4	8.82	-1.5053840013751	Down	MYB	Myb_DNA-binding	ARID,Response_reg,SNF2_N	NA	GO:0003676//nucleic acid binding	NA	K03006//DNA-directed RNA polymerase II subunit RPB1 [EC:2.7.7.6];K01184//polygalacturonase [EC:3.2.1.15];K12447//UDP-sugar pyrophosphorylase [EC:2.7.7.64];K05658//ATP-binding cassette, subfamily B (MDR/TAP), member 1 [EC:3.6.3.44]	gi|700188845|gb|KGN44078.1|//hypothetical protein Csa_7G169590 [Cucumis sativus];gi|147768020|emb|CAN69396.1|//hypothetical protein VITISV_021034 [Vitis vinifera]
Csa2G228420	1827	43.3	15.39	-1.49237379328588	Down	HSF	HSF_DNA-bind	-	GO:0005634//nucleus	GO:0043565//sequence-specific DNA binding;GO:0003700//transcription factor activity, sequence-specific DNA binding	GO:0006355//regulation of transcription, DNA-templated	K09419//heat shock transcription factor, other eukaryote	gi|449474405|ref|XP_004154162.1|//PREDICTED: heat stress transcription factor A-7a [Cucumis sativus]
Csa2G351740	885	33.22	12.65	-1.3929146883807	Down	MYB	Myb_DNA-binding	ARID,Response_reg,SNF2_N	NA	GO:0005488//binding	NA	K08869//aarF domain-containing kinase;K17613//calcineurin-binding protein cabin-1	gi|449450578|ref|XP_004143039.1|//PREDICTED: transcription factor MYB1R1-like [Cucumis sativus]
Csa1G023050	1083	47.59	18.14	-1.39148399863197	Down	C2C2-CO-like	CCT,zf-B_box	GATA,PLATZ	NA	NA	NA	K12130//pseudo-response regulator 5;K12135//zinc finger protein CONSTANS;K12129//pseudo-response regulator 7	gi|778656334|ref|XP_011648856.1|//PREDICTED: zinc finger protein CONSTANS-LIKE 16 [Cucumis sativus]
Csa3G852530	810	10.9	4.25	-1.35879338863922	Down	G2-like	G2-like	Response_reg	NA	NA	NA	K12741//heterogeneous nuclear ribonucleoprotein A1/A3;K14491//two-component response regulator ARR-B family;K14317//nuclear pore complex protein Nup214	gi|778686444|ref|XP_011652394.1|//PREDICTED: probable transcription factor KAN4 [Cucumis sativus]
Csa5G604000	939	37.19	14.53	-1.35588004497915	Down	MYB	Myb_DNA-binding	ARID,Response_reg,SNF2_N	NA	GO:0005488//binding	NA	K08869//aarF domain-containing kinase;K17613//calcineurin-binding protein cabin-1	gi|449434861|ref|XP_004135214.1|//PREDICTED: transcription factor MYB1R1 [Cucumis sativus]
Csa2G402090	1181	55.89	22.43	-1.31716055457652	Down	mTERF	mTERF	-	GO:0005739//mitochondrion;GO:0009507//chloroplast	GO:0003690//double-stranded DNA binding	GO:0006355//regulation of transcription, DNA-templated	NA	gi|778672961|ref|XP_011649898.1|//PREDICTED: uncharacterized protein LOC101218603 isoform X1 [Cucumis sativus]
Csa2G408430	1368	99.53	39.95	-1.31693594037023	Down	G2-like	G2-like	Response_reg	NA	NA	NA	K14491//two-component response regulator ARR-B family	gi|449442040|ref|XP_004138790.1|//PREDICTED: transcription activator GLK1-like [Cucumis sativus]
Csa1G535790	1135	47.44	19.26	-1.30049630670254	Down	mTERF	mTERF	-	GO:0005739//mitochondrion;GO:0009507//chloroplast	GO:0003690//double-stranded DNA binding	GO:0006355//regulation of transcription, DNA-templated	K15032//mTERF domain-containing protein, mitochondrial	gi|449475105|ref|XP_004154376.1|//PREDICTED: transcription termination factor 3, mitochondrial [Cucumis sativus]
Csa1G071840	1181	15.87	6.47	-1.29446451084267	Down	MYB	Myb_DNA-binding	ARID,Response_reg,SNF2_N	NA	NA	NA	K09422//myb proto-oncogene protein, plant	gi|659067927|ref|XP_008441942.1|//PREDICTED: transcription factor MYB86-like [Cucumis melo];gi|700209525|gb|KGN64621.1|//hypothetical protein Csa_1G071840 [Cucumis sativus]
Csa3G061520	2139	26.65	10.87	-1.29378359261923	Down	C3H	zf-CCCH	PHD,SNF2_N,zf-C2H2	NA	GO:1901363//heterocyclic compound binding;GO:0097159//organic cyclic compound binding	NA	NA	gi|700200916|gb|KGN56049.1|//hypothetical protein Csa_3G061520 [Cucumis sativus]
Csa3G778360	705	12.48	5.13	-1.28258720325519	Down	OFP	Ovate	-	NA	NA	NA	NA	gi|778684415|ref|XP_004136703.2|//PREDICTED: transcription repressor OFP15-like [Cucumis sativus]
Csa1G043040	534	55.24	22.73	-1.2811156354402	Down	zf-HD	ZF-HD_dimer	-	NA	NA	NA	NA	gi|449439493|ref|XP_004137520.1|//PREDICTED: zinc-finger homeodomain protein 9-like [Cucumis sativus]
Csa2G356600	429	20.82	8.61	-1.27388492590257	Down	AP2-EREBP	AP2	-	GO:0043231//intracellular membrane-bounded organelle	GO:0001071//nucleic acid binding transcription factor activity;GO:0003676//nucleic acid binding	GO:0006351//transcription, DNA-templated	K09286//EREBP-like factor	gi|449450247|ref|XP_004142875.1|//PREDICTED: ethylene-responsive transcription factor RAP2-1 [Cucumis sativus]
Csa4G269160	552	38.57	16.18	-1.25326753819878	Down	FHA	FHA	-	NA	NA	NA	K09578//peptidyl-prolyl cis-trans isomerase NIMA-interacting 1 [EC:5.2.1.8];K00326//cytochrome-b5 reductase [EC:1.6.2.2]	gi|449463863|ref|XP_004149650.1|//PREDICTED: uncharacterized protein LOC101219513 isoform X1 [Cucumis sativus]
Csa5G429450	2862	37.46	15.77	-1.24816823945254	Down	S1Fa-like	S1FA	-	GO:0016020//membrane	GO:0000166//nucleotide binding;GO:0004672//protein kinase activity	NA	K00924	gi|778702671|ref|XP_011655243.1|//PREDICTED: probable receptor protein kinase TMK1 [Cucumis sativus]
Csa6G454440	1393	23.81	10.5	-1.24437211920404	Down	mTERF	mTERF	-	NA	NA	NA	K15032//mTERF domain-containing protein, mitochondrial;K06620//transcription factor E2F3	gi|700193092|gb|KGN48296.1|//hypothetical protein Csa_6G454440 [Cucumis sativus];gi|778717628|ref|XP_011657727.1|//PREDICTED: transcription factor E2FA-like isoform X3 [Cucumis sativus]
Csa1G269860	4387	36.77	15.55	-1.24161459618533	Down	AP2-EREBP	AP2	-	GO:0005634//nucleus	GO:0003677//DNA binding;GO:0003700//transcription factor activity, sequence-specific DNA binding	GO:0006355//regulation of transcription, DNA-templated	K09287//RAV-like factor	gi|449457911|ref|XP_004146691.1|//PREDICTED: AP2/ERF and B3 domain-containing transcription factor At1g50680-like [Cucumis sativus];gi|700210148|gb|KGN65244.1|//hypothetical protein Csa_1G269860 [Cucumis sativus]
Csa3G560210	732	12.7	5.48	-1.212580698699	Down	NAC	NAM	-	NA	NA	NA	K00162//pyruvate dehydrogenase E1 component beta subunit [EC:1.2.4.1];K05941//glutathione gamma-glutamylcysteinyltransferase [EC:2.3.2.15]	gi|449460537|ref|XP_004148002.1|//PREDICTED: NAC domain-containing protein 68-like isoform X2 [Cucumis sativus]
Csa1G051740	1119	16.69	7.43	-1.167549838824	Down	bHLH	HLH	-	NA	NA	NA	K16189//phytochrome-interacting factor 4;K11253//histone H3;K12126//phytochrome-interacting factor 3	gi|449473858|ref|XP_004154003.1|//PREDICTED: transcription factor bHLH137 [Cucumis sativus]
Csa6G490190	1107	10.79	4.81	-1.16558606571797	Down	G2-like	G2-like	Response_reg	NA	NA	NA	K14491//two-component response regulator ARR-B family	gi|449448344|ref|XP_004141926.1|//PREDICTED: uncharacterized protein LOC101218926 [Cucumis sativus]
Csa1G051760	1653	19.32	8.65	-1.15932305631169	Down	bHLH	HLH	-	NA	NA	NA	K16190//glucuronokinase [EC:2.7.1.43];K13422//transcription factor MYC2	gi|449473864|ref|XP_004154005.1|//PREDICTED: transcription factor ICE1-like isoform X1 [Cucumis sativus]
Csa2G080170	969	16.4	7.43	-1.14226169896685	Down	bHLH	HLH	-	NA	NA	NA	K13422//transcription factor MYC2	gi|700206198|gb|KGN61317.1|//hypothetical protein Csa_2G080170 [Cucumis sativus]
Csa1G269870	1020	46.14	21.9	-1.12945890888929	Down	AP2-EREBP	AP2	-	NA	NA	GO:0044238//primary metabolic process;GO:0009987//cellular process	K09287//RAV-like factor	gi|449457911|ref|XP_004146691.1|//PREDICTED: AP2/ERF and B3 domain-containing transcription factor At1g50680-like [Cucumis sativus]
Csa3G207940	2137	11.7	5.8	-1.12375482000939	Down	ABI3VP1	B3	AP2,Auxin_resp	GO:0005634//nucleus	GO:0003677//DNA binding	GO:0006355//regulation of transcription, DNA-templated	NA	gi|778680100|ref|XP_011651246.1|//PREDICTED: B3 domain-containing protein Os01g0234100-like [Cucumis sativus]
Csa7G170600	726	42.58	19.75	-1.10832329650047	Down	MYB	Myb_DNA-binding	ARID,Response_reg,SNF2_N	GO:0005634//nucleus	GO:0003677//DNA binding;GO:0003676//nucleic acid binding	NA	K09522//DnaJ homolog subfamily C member 2;K01184//polygalacturonase [EC:3.2.1.15]	gi|778725458|ref|XP_004151125.2|//PREDICTED: protein RADIALIS-like 1 [Cucumis sativus]
Csa2G005920	1590	18.54	8.68	-1.09487429618105	Down	G2-like	G2-like	Response_reg	NA	NA	NA	K14491//two-component response regulator ARR-B family	gi|778666000|ref|XP_011648670.1|//PREDICTED: homeobox protein 5 [Cucumis sativus]
Csa3G687740	1546	35.12	16.47	-1.092452289809	Down	Sigma70-like	Sigma70_r2,Sigma70_r3,Sigma70_r4	-	NA	GO:0003677//DNA binding;GO:0016987//sigma factor activity;GO:0003700//transcription factor activity, sequence-specific DNA binding	GO:0006355//regulation of transcription, DNA-templated;GO:0006352//DNA-templated transcription, initiation	K01872//alanyl-tRNA synthetase [EC:6.1.1.7];K03086//RNA polymerase primary sigma factor	gi|449464016|ref|XP_004149725.1|//PREDICTED: RNA polymerase sigma factor sigD, chloroplastic [Cucumis sativus]
Csa3G100800	1062	14.16	6.74	-1.07100076890114	Down	NAC	NAM	-	NA	NA	NA	K02437//glycine cleavage system H protein;K13126//polyadenylate-binding protein;K00162//pyruvate dehydrogenase E1 component beta subunit [EC:1.2.4.1];K05941//glutathione gamma-glutamylcysteinyltransferase [EC:2.3.2.15]	gi|449463130|ref|XP_004149287.1|//PREDICTED: NAC transcription factor 25 [Cucumis sativus]
Csa6G446410	1689	68.26	32.7	-1.06174977871342	Down	Sigma70-like	Sigma70_r2,Sigma70_r3,Sigma70_r4	-	NA	NA	NA	K03086//RNA polymerase primary sigma factor	gi|700192976|gb|KGN48180.1|//hypothetical protein Csa_6G446410 [Cucumis sativus]
Csa6G291920	2409	44.22	21.27	-1.05587899185555	Down	ARF	Auxin_resp	-	NA	GO:0005488//binding	GO:0050794//regulation of cellular process;GO:0009725//response to hormone	K14486//auxin response factor	gi|778714345|ref|XP_011657217.1|//PREDICTED: auxin response factor 4 [Cucumis sativus]
Csa5G622830	1527	80.1	38.85	-1.043887644001	Down	C2C2-GATA	GATA	-	GO:0005634//nucleus	GO:0043565//sequence-specific DNA binding;GO:0008270//zinc ion binding;GO:0005488//binding;GO:0003700//transcription factor activity, sequence-specific DNA binding	GO:0045893//positive regulation of transcription, DNA-templated	K19027//zinc finger FYVE domain-containing protein 26;K17895//GATA-binding protein 3;K17894	gi|449449346|ref|XP_004142426.1|//PREDICTED: GATA transcription factor 8 [Cucumis sativus]
Csa3G878210	1053	43.51	21.24	-1.03456325073638	Down	AP2-EREBP	AP2	-	GO:0005634//nucleus	GO:0003677//DNA binding;GO:0003700//transcription factor activity, sequence-specific DNA binding	GO:0006355//regulation of transcription, DNA-templated	K13434//pathogenesis-related genes transcriptional activator PTI6;K09286//EREBP-like factor	gi|449437136|ref|XP_004136348.1|//PREDICTED: ethylene-responsive transcription factor SHINE 2 [Cucumis sativus]
Csa5G187320	1711	22.56	11.2	-1.03364284382764	Down	LIM	LIM	-	NA	GO:0046914//transition metal ion binding;GO:0008270//zinc ion binding	NA	NA	gi|778701116|ref|XP_011654967.1|//PREDICTED: protein DA1-related 2 [Cucumis sativus]
Csa6G502620	2028	37.08	18.2	-1.02670279353947	Down	GRAS	GRAS	-	NA	NA	GO:0006355//regulation of transcription, DNA-templated	K14494//DELLA protein	gi|449451515|ref|XP_004143507.1|//PREDICTED: scarecrow-like protein 4 [Cucumis sativus]
Csa6G095910	3094	699.95	347.2	-1.01148492094891	Down	MYB	Myb_DNA-binding	ARID,Response_reg,SNF2_N	GO:0005634//nucleus	GO:0003677//DNA binding	GO:0006355//regulation of transcription, DNA-templated	K12133//MYB-related transcription factor LHY	gi|449445533|ref|XP_004140527.1|//PREDICTED: protein LHY-like isoform X2 [Cucumis sativus]
Csa1G467200	984	10.15	5.5	-1.00712443443338	Down	BES1	DUF822	-	NA	NA	NA	K14503//brassinosteroid resistant 1/2	gi|449459312|ref|XP_004147390.1|//PREDICTED: BES1/BZR1 homolog protein 4-like [Cucumis sativus]
Csa5G162030	792	13.13	6.54	-1.0055043753948	Down	C2H2	zf-C2H2	PHD	NA	NA	NA	NA	gi|449469444|ref|XP_004152430.1|//PREDICTED: zinc finger protein ZAT9 isoform X1 [Cucumis sativus]
Csa4G312300	1306	15.24	7.62	-1	Down	G2-like	G2-like	Response_reg	NA	NA	NA	K12741//heterogeneous nuclear ribonucleoprotein A1/A3;K06236//collagen, type I, alpha;K14491//two-component response regulator ARR-B family;K14317//nuclear pore complex protein Nup214	gi|700199239|gb|KGN54397.1|//hypothetical protein Csa_4G312300 [Cucumis sativus]
