# Supplementary material for: Transcriptome Profiling of Cucumber (Cucumis sativus L.) Early Response to Pseudomonas syringae pv. lachrymans
Source: Int J Mol Sci. 2021 Apr 18;22(8):4192. doi: 10.3390/ijms22084192 (PMC8072787; doi:10.3390/ijms22084192)
Supplement: Supplementary file 1 [file ijms-22-04192-s001.zip › Suppl_tableS7.xlsx]

## Sheet: Arkusz1
Gene name	Transcript name	Sequence
Novel_G000001	Novel_T000023	CGAGAAACGAATCGTGAAGGCCTCTGTTATCTTATCTCAACTCTTTTCGGAGTTTCTTTCTTCCATTTTCATCACTTCAAACATTTCTTCACATTCCCCAAATCTCTTCATTCTTCTTCCATTTGGGTCAACCGACGCCGTTCCCGGCTGATGGACGCCAACAATCAAGCCCAATCCTCTCCTTACCCTCCTCCTCAGGCCCCTGTTCCGGCTCCTCCCTTCCATCACCTCCTTCAGCAGCAACAACAACAGCTTCAGATGTTCTGGTCCTTTCAACGTCAAGAAATCGAACAGGTTAACGATTTTAAAAACCACCAGCTTCCTCTTGCCCGCATTAAGAAGATCATGAAAGCCGACGAGGACGTTCGTATGATCTCTGCCGAGGCCCCCATTTTGTTC…
Novel_G000002	Novel_T000049	ATACAATTGAGGAACAAAAGAAAAAGCAGAGGAAAGCCCGAAAAATAATGCAGAGAGCATGTAGTGGCAGTAAGGGAGCAGCTTTTTTCATTAAACCCATTTTGATTTTCATGTGGTTATGATTTGTCTGTCTAATGTGCGTGTATATACAAAGCAAACCTGTATCCTTTGCATATGAATTATGAAACAGTGAATCTTAACAGTTTTGAAGTTGGAGAAGATATTACTTCTTAAGATCCAGCATCGAAAGTCTTCAAAATTTCCCCGGAAAATCGTGGTGGGATTTCTTGATTCTTGAGAAAAAGAAGAAGAAGAAAAATTCTCTTGTTGGATTTGTTTTCAAGACTGTTCTTCCTTTTCTATTCTGTTTTGCCAATTCTTGCCTCATCAGTCATCGCC…
Novel_G000003	Novel_T000066	CTCGCACCACTTCTCAAGAGTCATAGCCCCTTTTCACTGCCAGACCTTTCCCTCTCTTTTTCCCGCCATTACAATGTCTTCAACCGCCAGTTTGAGCTCTCCCATCCATTACTGACATCATACTATAGCAATCGGAGCACCCAACGCCGGCATGATCACCTCCAGAGATGTCCAAGATATCATTTCAAAGCTATCTTCTGATAAAGCTAAAACTCGCGAGGAAGGGATAAAGTTGTTGAATACATGGCTAGAGGGAGAAAAAGCAATAGATTTCTGTAAATTTATTGGACAGAACACTGCTAAGCTCAAGCCAGAAGAAATTCCATCTCCTGAAACGTGGCCTTTCATCACAAAACTGTTGATTCAATGTGTGTCTATGGAGATATCTTCAAGCAAGCG…
Novel_G000004	Novel_T000191	TTTAAGAAGAGTGAGTTCAATCAGAACTCACACCTATTAACATAAGCAAGGCAGCTACACATCCAACCTTCATTAATCTTCTCAAACATAGTAAAATAATGTTGCTTCCTTTGGTACTTGTAATGATGACAATGATCTCATGCTTGGAAGCTGTTGGAACAAACAATAACAACAATCTCATGAATATGGTCATAAAAACTCAAACCTTTTTATCTCCATCATTCACCATGACACCTGGTTTAGTAATCGAGAAATTCTTCTACAATATCAACTTCCCAAAATCCCACATTGCCATAAAAAGCTTTCATGTTGAAGTTGTAGATGAATCAGGCAATCAAATCCCACTTTCACAAACTTACCTTCATCACTGGGTACTTGTGAGATATTACCAACACAAAA…
Novel_G000005	Novel_T000192	TTTTACTATATTTATAAATCTTTTAAAATGATGTTATATACTTAATTATTTTGAATCTAATTGCTAAATTTGTTGCTATCCATTTGTTTTCCTAAATTTTCTCTCATCTATATAATATCAAAAATTACAAAGTCAAAATGAAAAAAAACCATCAAAATATATATACTAAGTGTATTAAGAGAGGAGGAGGAGAAGAAGTGTGGAAATCATAGTAATGATAATAGTAAGAAGAAATGTTGATGATAATTATAATAGTAATAATATATATTTAAAAATAATAATTTGTATGGAATAGAGTCGAGTCTACGTAATGTTGACCCATTTTACTAAAATAGTTTTGAAAGTATCCATTTTTCTCAAATTTCTTTAAAACCAACCCTTTTCAGATCTCACAATATT…
Novel_G000006	Novel_T000193	ATATATAAATCCTCTATTATCTCAGCAACCATTGATATCTACAATCTCTTTTTCCTTCTCTCTCTCTCTGCTTCGGTTTCTCCTTTCATGTCTACGATAAAAACAATGTTATTCCATCATTGGTTTCTCCAATTTACACTCATAGTGACACTATTCCTAAACTTGGAAGCCATTCAAATAAACCACCAAACCCTAAAGACCCAATCTTTTCTCTCCCCATTATTCACTTTAACTCCTGGCTCAGTAATTGAAAAATTCTACTACAATCTCAACTTTCCCAAAGGCCATATTGCAATAAAGAGCTTTGATGCTGAAGTTGTCGATGAACAAGGTAACCCCGTCTCGCTTTTCGACACATATCTCCATCATTGGACACTCGTAAGATATTACCAACACAAC…
Novel_G000007	Novel_T000203	CCGTTTTTAGGTTGGAAACATGGTCTCATCCTCCTCTATAAAAAGCTGCACCAACTGCAATGCCCATTGTCTTACCATTGCACTCAAAATCGAGCCAATTACGCCACTAATACTTCTTTTTTTTTTTTCTCTCTTCGGCTAAAATGGCTACTCCCACTCCGGCTCCGGCTCTTAACGACGAAGAGCGATTGATTCAAAAGAAATACTGGATTGAACATTCAGCCAGATTAACGGTAGAGGCTATGCTGCTGGATTCGAACGCCTCTGATCTCGACAAAGAAGAACGACCTGAAGTGCTTTCTCTGCTTCCGCCTTACGAAGGAAAATCGGTACTGGAACTTGGAGCCGGCATTGGTCGTTTCACCGGTGATTTAGCGGTGAAGGCTGGGCAGGTTCTGG…
Novel_G000008	Novel_T000247	CTTCGCAGTCGCTGCGTTGCCTTGGTCACCTCTTTTACTATTACAACCTCCTCTTCATTCTCACAATGAAGTTGCAGTTGCCGACTTCAACTCTTCACACTTTCACTTTCTCCCTCTCTCTTCTTTCTCTATGGAATTCGCTTTGGAGTCCAGTCCTAAGTAGCCTTCTCCATCTCCATCTCTCTCACTCTCAGGTCTAGATTCTTAGGCATGGCTGCTTTTGAAAAAGACGATATACCAATGCTATCAAACACTGATCCACCAATGTTTGACGAACAAGTGGATTCTTATTTTCCTTCATATGCATCCTTGGGCCGGAGTTCGTCACTATCAATTCCAGAAAATTCTTCTGGGATGTATGGTAGCGAAGCAAATCTTGTTGGTCATACTGGTCCCCTA…
Novel_G000009	Novel_T000268	GAAAAACCCTAAGTTGAGAGCTCTGTCTCATTTGAGAAATAATCTCAAGAGAGTCCCCAACGAAGAGAAAGAAAGCAAAAGGGTTTTAGAGACACTCTTCTTCTGGGTTTTACCGCTTCTTCCCCCACAACGCCGAGATGATTACTGATAAGGGCAAGAAGGCCAAGCTCTCTGAAAAGCCCGAAGACGACAATTCTGAGGTCATCGATGAGAAACTCGTTATGTCGATCGAGAAGTTGCAGGAAATTCAAGACGAGCTCGAGAAGATCAACGAGGAGGCCAGTGATAAAGTATTGGAAGTGGAACAGAAGTACAATGAAGTACGAAAACCTGTCTATGACAAGCGGAATGAGATCATCAAATCAATTCCTGACTTCTGGTTAACAGCGTTCTTGAGCC…
Novel_G000010	Novel_T000271	ATTTGGAAAAAAGGATTGATATTTGGAGCATATTCAGTAGGATCTCAATTAAAAAGAATTGAAAAAAAGAAAGAAAAAAGTTTGGTGGTGTGAGATTGAAAATAAAGTAGCAAAGAATTTTTTTTGAAAAATGCAAGTCCTAAAGATTTGTGGTAAAGCACGTAGCTTTCTGAATTCAACCCAAAACTTAAGACTTGTTCTTTGTTCTTTTTGTTATTCTTCCCTTGTTTTTGAATGGATTTTCAATGATTTCTGTGAGGGTAGGGATGCTAGGAAGGAAATAGAGCTAAAAGGTGCCAGGAGAGAGATGGAACTGGAAGATACTGAGCTTGGAGAAGGAGAAGCTTGGTCCTACTAGAACAATGAAGATTTTGATTTAAATATCGACACTGATATTGC…
Novel_G000011	Novel_T000275	AGGGCTTCAAAACAGAGATAAAGCCATTCTCACTTCTTTTTTCTCTTCTCTTCTTTTCTTGATATAGAGTGAGAGAAGATCATCAAAAGATCAACACACACACAAACTCTTCAAATCTTTGACAAATTAACCCATTTCATCAGATCTTCATCTCATAAAGAAAAGAGAAAAAAGGGTAAGGTTTTTTCTTTTTAGTTTCAATGATGATGAAGAAACGTCAAGTAGTAGTAAAAAGATCATCAGAAGGAGGGGGATCATCTTCATCATCATCAGCAAATAATAATAACAGAAACATTAGTTCATCTTCAAGAGTGAGAAGTGTTGTAAGATATGGAGAATGCCAAAAGAATCATGCTGCAAATATTGGTGGATATGCTGTTGATGGGTGCAGAGAATTTC…
Novel_G000012	Novel_T000333	CTCTGATTTGCCGTCTTGGAGGTATTAGTCAAATCCGAGGGCTTGTAAATGGAAAGAGGGAAGATATGAACAGTATTAAACTGCTCTGTTTCATAGAATCTGCCTTTTGTATCCTGAGCGGCTATCTGTTCTTACATAATCATTTTTGGAGGTTTCAAATTGTCTTTAAGACCCCATTTCTGCTTCTACATTCTATTTTAGCTCTCTATACTTTTTCCTTCTTTTCACTTTTAACCCCTTTTGTGTCCTGAGCAGCTATCTATTCTTACATAATCATTTTTGGGGGTTTCAGATTGTCTCTAAGACCCCATTTCTGCTTCTACATTCTATTTTAGCTCTCTATACTTTTTCCCTATTTTCTTCTTCTTCTTCTTCTTCTACATCTGTTTCATCTATTTC…
Novel_G000013	Novel_T000334	CTCTGATTTGCCGTCTTGGAGGTATTAGTCAAATCCGAGGGCTTGTAAATGGAAAGAGGGAAGATATGAACAGTATTAAACTGCTCTGTTTCATAGAATCTGCCTTTTGTATCCTGAGCGGCTATCTGTTCTTACATAATCATTTTTGGAGCAACGGAAGGGTTTGAACTAGAAGGTATAGTTGGATTTATAAATGGGGAGTGGTAGAAAAAGGAGGAAGCAACATTTCAGAAGGATTCACGCTTTTCCTTGTGGTAGAGCTTCATTCAAAGATGAACACTCTTTAATTGGAGGGCCCGGATTCTCAAGGGTAGTTTACTGTAACGATCCAGATAGTTTTGAGGCTAATCTACTTAACTATGGAGGCAATTATGTCAAAACTTCCAAGTATACCGTTGC…
Novel_G000014	Novel_T000335	CCGCCATCTTCTTCTTCTTCAATATTTTTAACAATTTTAAGTTTTGTAAATGAATAAATAAATAATAGATATTCCCTAGATCCTCTCCTTCTCTTCCTCCATCTCACCCTCACTTGCACTTTAACTGTCATTTTCTTTTAACTATTTACGTCTCCATTTCTAACACGAAGCATCTCATGATTCGCTTGTTTTTAGGAAAAAAACAGTGTGTTATTTTTCTTTTGATTTTTTTTTTTTATAAAATTTAATTTTGTAATCTTGACAGGAAATTTCTAACTGGGTTAGAGAGTCAGATCATAAATTTTTCTACTCACTAGTCAATACTACTCAATCTGTAGTGAACTTTTTTTAACTTTTAAAGGAAACCTTCATTTATTAGATTGCTTTCAGTTTCTTCAA…
Novel_G000015	Novel_T000336	GGGTCATCGTCTTTTTTCTTCCTTCATTCCCTCCACCATCACGCAAACACATCACTACCCACCCCCACGCCCCACGCTAAAGGGGGAGCATCATCGGCGCAGTCACCATCTCCGGCACAGTTCTCAAAAGCATCGTTCCCACAGCCCACCTAATCTCCACTGCCCAGTACCGAAGAAGAACAGAGCGAAACAAAGACCAATATGCTCAACCCAGATTTACTATTGTGGTTTCATCTGCAAAATCTTTATCCTTTTGAGCTAAGATAAAAAAATTTGACTTGAAGAAGAAGGCAAAAAAGGCTTTGTCAACGCTTCTGAAAAGTCTTTGGTTTGGCCGTTGACGTGAGGTTCCAGCTCTTTCGTTTTTGTTTTAGCAGCAGCCAGAGGGAAAAGAAAAAT…
Novel_G000016	Novel_T000337	CTTTTCCTTTTCTAATACAAAAAGATCCAATCCTTAGAACTTAGAACCCATGCCTGCAAACCCTCCAAACAATAAAATTTTGAAAACTATATATATAAATGGAATTTAGGGTCATCGTCTTTTTTCTTCCTTCATTCCCTCCACCATCACGCAAACACATCACTACCCACCCCCACGCCCCACGCTAAAGGGGGAGCATCATCGGCGCAGTCACCATCTCCGGCACAGTTCTCAAAAGCATCGTTCCCACAGCCCACCTAATCTCCACTGCCCAGTACCGCAACGGAAGGGTTTGAACTAGAAGGTATAGTTGGATTTATAAATGGGGAGTGGTAGAAAAAGGAGGAAGCAACATTTCAGAAGGATTCACGCTTTTCCTTGTGGTAGAGCTTCATTCAA…
Novel_G000017	Novel_T000352	ACAATAGTAAATTTGATCGAACTTTTATAGTTGCTGAAAATGGTTTTTCAGATCGATTTTGTTCACCAGATAAAAATATTTCGTCGAGTTCCATGTATTTGACAATTTCTTTATATTCTGACTGTGAGTCTGTACCACCATACACCCCTGCTTGTTCTGAAGCTGCATATAGCTACATCCCAGAAAAAAGTAACGTAGTTCTGATGAATGATATGTGTTGAATAAGTGTAGTAGCGCCAATTCCACAATGGTTGCTAAAACAAGTTGGTGATGATTTTCAAAAGGTAGCGCAACATATCACCGCTCAGTTTACGTCAGGGCGGACGGTAAATGTTCAAGTATGTAACAATTGCAAAGATTCTGGTGGTGGTGGTGTTTATGTTTATGACTTGGAATTGA…
Novel_G000018	Novel_T000387	ATTAGCGCCGTCTCATACTGAGGCTATCTTCTACCTCTTCAAACCACTGAGACTCAAAAACCTCAATATCACCTTCAAGATGGATCATACGAAGCTCCAGAAAATGGCTGGTGCAGTTCGCACTGGTGGAAAAGGTAGCGTGAGAAGGAAGAAGAAGGCTGTCCACAAGACAACTACCACAGACGATAAACGGCTTCAAAGTACCTTGAAGAGAATAGGAGTTAATGCAATCCCTGCTATTGAGGAAGTCAACATTTTCAAGGATGATGTAGTTATTCAATTTACTAACCCAAAGGTTCAGGCTTCTATTGCGGCAAACACATGGGTTGTTAGTGGTTCTCCTCAAACGAAAAAATTGCAGGATATTCTGCCCGGAATTATCAACCAATTGGGACCCGA…
Novel_G000019	Novel_T000432	AAAAAACCCTAAAAATTAACTTTGTGTCATTTTCTCCTTTTCCTTCTCCCTCACGTTCTCTTCTTGCGGCTTTCTCCTTCTCCCTCACTTTCTCTTCTACTAAGACAAAGGGCAGCCCGACTTCAACTCTTCTCCTTTCTCAGTTGCTGTCGCATCTCATTTACCGTTGTCAACCGTTCAGGCATCCATTGGTGGTCAGTTTGTACGCGTCGTGCAAGATTCTCCATCGAAGATGCGGCATGCAAGATTCTCCTTTCTCAGTCTTTTTTTTATAACCACGCACTTTCTGTTTAGGGATTGTTTTGATCGGATTGCTTTTGTTGTTGTGCATTTTCATTGAATGGTTGAAGGCACGTATCTCGTACACATCTCGCACCTATCTTGCACATTTCAAAACTT…
Novel_G000020	Novel_T000433	GTGAAAAGTCTATATTACCCTTTAATTTAAAAAACCCTAAAAATTAACTTTGTGTCATTTTCTCCTTTTCCTTCTCCCTCACGTTCTCTTCTTGCGGCTTTCTCCTTCTCCCTCACTTTCTCTTCTACTAAGACAAAGGGCAGCCCGACTTCAACTCTTCTCCTTTCTCAGTTGCTGTCGCATCTCATTTACCGTTGTCAACCGTTCAGGCATCCATTGGTGGTCAGTTTGTACGCGTCGTGCAAGATTCTCCATCGAAGATGCGGCATGCAAGATTCTCCTTTCTCAGTCTTTTTTTTATAACCACGCACTTTCTGTTTAGGGATTGTTTTGATCGGATTGCTTTTGTTGTTGTGCATTTTCATTGAATGGTTGAAGGCACGTATCTCGTACACATCT…
Novel_G000021	Novel_T000434	GTGAAAAGTCTATATTACCCTTTAATTTAAAAAACCCTAAAAATTAACTTTGTGTCATTTTCTCCTTTTCCTTCTCCCTCACGTTCTCTTCTTGCGGCTTTCTCCTTCTCCCTCACTTTCTCTTCTACTAAGACAAAGGGCAGCCCGACTTCAACTCTTCTCCTTTCTCAGTTGCTGTCGCATCTCATTTACCGTTGTCAACCGTTCAGGCATCCATTGGTGGTCAGTTTGTACGCGTCGTGCAAGATTCTCCATCGAAGATGCGGCATGCAAGATTCTCCTTTCTCAGTCTTTTTTTTATAACCACGCACTTTCTGTTTAGGGATTGTTTTGATCGGATTGCTTTTGTTGTTGTGCATTTTCATTGAATGGTTGAAGGCACGTATCTCGTACACATCT…
Novel_G000022	Novel_T000435	TTTTAAGCGTCCTTTCTAGTTCTTCATTCTATTTCTTGCAATTTGCATTGCGCCACCAACCACTGCTTCTTCCTTCACCAACCTTTTCTCCTCGGCGGACGCTCCGAGGCCTTTCTCTTTTGCTTCGTTCTCTTCTCCGATCTCAGATCTCGAGCTCAATCCTTCGAAATGCAGAGCTCTGCGTTCACCTTCTCCTCTTCTCTTCCTCTTCTCAAGCCTCGCCGGCCTCATACTTCCTCCTTCACTTCTCCCTCCAACTCAATTCGGTTATCTTCTTCGTCTTCCACAAATTCCAGAGATCTTGGAGACCTTAACAATGTTGGCATCCCTTCCTCTTGGCCCCGCCGATCTTGGACTCTCTCTTCATCTCCTTTTTCGTCATCCAAACTCCGGCCATGG…
Novel_G000023	Novel_T000447	TTTTTCTCTATGAAGAGAGTTCACTTTGATCAGAAAATTGAAGAGACCATATATGAGTTCTTCATTCATCTAATTTTAAGTTATTCTTGAGTGTTTTTTAGTATAAATTAGTTCCTTATAACTCTACTAAGAATATATGTCAAGAAAGCAAGGATCTTGAAAACTGACAGCCCTAAGCAGCAATCCAAAAGATCAAAATGGGATCAACAACAACAAGCAACCATTATTACAGCCCTTGTGCAGCTTGCAAATTCCTAAGAAGAAAATGCTTAGCAGGCTGTGTTTTTGCACCCTATTTTCCGCCTGAAGAACCCCAAAAATTTGCCAATGTCCACAAGGTATTTGGAGCGAGTAACGTGGCGAAGCTCTTGAACGAAGTTCTTCCTCATCAACGACAAG…
Novel_G000024	Novel_T000459	ATTCAAAAGAAATGGATCCCATCTCATCTTTGCTCTTCTTCATCTCCATCTTCTTACTTTTACTAAAACTATTCTTCTTCAAACCGAAAACCCCCAACTTCCCTCCTTCGCCTCCAAAACTTCCCCTAATTGGCAACCTTCACCAACTAGGCTCCCTACCACACCAATCCTTGGCCACTCTTTCCCAAAAATATGGCCCTCTAATGCTCTTAAAGCTAGGCCAAGCTCCTGTCCTCATAATTTCCTCTGTGAAAATAGCCGAACAAGTCATGAAAACCCATGTCCTCGTATTCTCTAACCGACCCCAAACGACTGCGGCAAAAACCTTGCTTTACGGATGTCAAGATGTGGGTTTTGCCCCTTATGGCGAGTACTGGCGCCAAGCAAGAAAAATATGTG…
Novel_G000025	Novel_T000460	TTTTCCAAACATCAAATAATATCGTTGCAAGATGTGTTATGGGAGAGAAATTTGAGGATGAAGATGGGAAGAGTAGATTTGAGGAGATATCAAGAAAGGCTATGGTGATAGTGACAGCGTTTTGTGTTGAGGATTTTTTCCCTTCATTTGGTTGGATTATTGATGTTATTAGAGGATTTCATTGGGATTTGAAGAATTGTTTCAAAACATTGGATGAGTTTTTTAGTAAAGTTGTTGAAGAACATAAGGAGAAGATCAAGAGATCAGGAGGTGTAATTAATATCGATGATTATGAATCGAAAAAGGATTTTGTGGATATTATGCTACAACTTCAACAAGATGACAAGCTTGACTATCATTTCTCTCTTGATAACCTCAAAGCAATTGTTTTGGACATGT…
Novel_G000026	Novel_T000461	ATGGATCCCATCTCATCTTTACTCTTCTTTATCTTCATCTTCTTACTTTCACTAAAACTATTCTTCTTCAAACCCAAAACCCCCAACTTCCCTCCTTCACCTCTAAGACTTCCCCTAATTGGCAACCTTCACCAACTAGGCTCCCTACCACACCAATCCTTGGCCACTCTTTCCCAAAAATATGGCCCTCTAATGCTCTTAAAGCTAGGCCAAGCTCCTGTCCTCGTAATTTCCTCGGCGAAAATGGCCGAACAAGTCATGAAAACCCATGACCTTGTATTCTCTAACCGACCCCAAACGACTGCGGCAAAAACCTTGCTTTATGGATGCCAAGATATGGGTTTTGCCCCATATGGTGAGTACTGGCGCCAAGCAAGAAAAATATGTGCTCTTGAGCTT…
Novel_G000027	Novel_T000462	CTCTCATGCTCCTCAAACTAGGTCAAACCCCAACTCTTGTTGTCTCATCAACAAAACTAGCTAAAGAAGTAATTAAGTCCCATGATACCATCTGCTCAAACAGAGTCCAAAACACAGCTGCAAAATCCATATTCTATGGATGTCATGATGTGGCCTTTGCTTCCTATGGAGAACATTGGAGACAGGCAAGAAAATTATGTGTTTTGGAGCTCTTGAGTTCCAAAAAAGTTCAGTCTTTCCAACATGTTAGAGATGAAGAAGTTGCAAGGCTAGTGAAAAAGATTGAAAAATGTAATAAGGATAACCCATTATTGTGTGTGATCAATCTCAAGGAGCTCTTGTTGTCAACTTCAAACAATATTGTGGGGAGATGTGTTTTGGGAGAGAAGTTTGTGGAAG…
Novel_G000028	Novel_T000469	TTTCAACCGAAGAACAATGCCTATCCTTCCTTGTTTCAATGAGTCCTTCTCCTCATTCTTCACATTCATCTTCTTCATTTCTCTTCTCATTCTCCTTCTAATCCCCAATCTCAAATCAAAACCCAACAAAAATCTCCCACCCTCTCCACCAAAACTTCCCATAATCGGCAACCTCCACCAACTCGGTCGCCATCCCCATCTCTCTTTCTGCCGCCTCTCCCAAAAGTTCGGCCCCATCATCCTCCTTCAACTCGGACAAATCCCAACTCTCATTATTTCATCTCCAAAAATTGCTAAACAAGCCTTCAAAACCCACGACCTCGCTTTCTCAAGCCGCCCTTTTCTCTTCTCCGCCCAACACATCTTCTACAACTGCACCGACATCGTTTTTTCCCCTTA…
Novel_G000029	Novel_T000470	TTTCAACCGAAGAACAATGCCTATCCTTCCTTGTTTCAATGAGTCCTTCTCCTCATTCTTCACATTCATCTTCTTCATTTCTCTTCTCATTCTCCTTCTAATCCCCAATCTCAAATCAAAACCCAACAAAAATCTCCCACCCTCTCCACCAAAACTTCCCATAATCGGCAACCTCCACCAACTCGGTCGCCATCCCCATCTCTCTTTCTGCCGCCTCTCCCAAAAGTTCGGCCCCATCATCCTCCTTCAACTCGGACAAATCCCAACTCTCATTATTTCATCTCCAAAAATTGCTAAACAAGCCTTCAAAACCCACGACCTCGCTTTCTCAAGCCGCCCTTTTCTCTTCTCCGCCCAACACATCTTCTACAACTGCACCGACATCGTTTTTTCCCCTTA…
Novel_G000030	Novel_T000472	ATTGCAGGAACTGACACCACTTTCATAGCTCTTGATTGGGGGATGACGGAGCTCATAACACACCCAAATGCCATGAAAAGAGCACAAAGTGAAATTCGAAGAGTGGTTGGTGATAGAAGAAATGTAACAGAGAGTGATGTTTTAGAAATGCCTTATTTGAAAGCTGTGGTTAAAGAGGTGCTCCGATTGCATCCACCAGTGCCGGTTTCGACTCCAAGAGAAACTATAGAAGATGTGAGGATTGAAGGGTATGATATTCCAGCTAAAACAAGGGTTTTTGTGAATGTTTGGGCAATTGGGAGAGACCCAGAATCATGGAAGGATCCAGAAACTTTTGAGCCAGAAAGGTTTTTGGAGAGTGAAGTTGATTACAAAGGGTTGAATTTTGAATTCATACCA…
Novel_G000031	Novel_T000473	TTTTTTTTCCACATGAACAACTAACTGGTGCTTTAATGCATTTTAGTTTTTTCTTAAAAGAAATACATTTTAATTTGAAAAAAAAATGGTAATATATAAAATTGATAAAAAGATATTTACAAAAATATAGGAAGACATAGTAAAAAAATTTAACCATCTTAATCACGTGTGCCTAAAATAAAAATCCTCAACAGGCTCACGGCCGTGTAGCAGAGTATGGAGACAAGCTGGCGAAGGACAGTCTTGAGCAATGAGAAATTTTAAAACACTCCTAATTCTTCTCTGAATTATCCAAGAAATTTCACAACCAACTTTTTATAAACATTGGAACAACGTTATCAAATTTATATGTGAGATTGATAGAGAGAAGGAGAAGGAAGAAAGGAGCGTACCCAATGT…
Novel_G000032	Novel_T000474	CGGAAGTCTTGAGCAATCATAAATTTTAAGATCCTCCTATATAAACATTGAAACAACGTTACAAAACATAAAGAATTAAGGAGAAGGAAGAAAGGAGGGTGTACACAATGTTCATCCTTCCATATCTCAACCAATCTCTCACTACTTCATTCTCCACATTCATCTTCTTCGTTTCTCTTCTCCTTCTCCTTCTCATTCCCAAACTCATATCAAAACCCAACCAAAATCTCCCACCATCCCCACCTAAACTTCCTCTAATCGGCAACCTCCACCAGCTAAGTCGTCATCCCCACCTCTGTTTCCACCGCCTCTACCAAAAGTTCGGCCCCATCATCCTCCTTCAACTCGGACAAATCCCAACTCTCATAATCTCATCACCAAAAATCGCCAAAGAAGCTT…
Novel_G000033	Novel_T000538	CAAACACACAGGGGTCCACTATCTCCTTTCCCTAAATTTCCTTTATCACTATTGTTTTTAATTAATTAATTGTTTTTGTCTTTATCATCATGAACGCAACAAGCATTGGCTTGATCTGAGAAATTACCTTTTTTATTTCCCATCTTAAATCCCCAAAGTTAGTTTCTCACACCACATCAGAAAGAAAGCTTAAGGTTGCAAATCGAAAATGGAACCGAGAGGGATTATCAGTCCGAGAAGATCTAAACCCAAAAAGACGCCACCCGCCCATCTTCCTGGCAGCACATCTGCCCCTGAATTAACCATTCAGTCAGAAATTCCCAGTACCACATCCAATCGGCGCACAACTAAATCAGCAAGTCAACCTTCGCCTTCAACCAAGAAAGGCAAAGCAGGTGG…
Novel_G000034	Novel_T000566	GTCGATTCTAAAATTGGGTCCAAAGAAAAGATTCATTTAATAGGAAACCAAACGGCAAATGCGTGGCCAAAAAGTAATGGATAATTCTGACCACATTGCCCTTCCCTCTCACTATAAATACACCCCTTCTATCCCTTCGGTTCTTCGCAACATTTTCTCTTCTCATTCACTTCGTAGCGAACCAATTCCCTCTCTTCCAAGATGCAAATCTTCGTTAAGACCCTCACAGGAAAGACCATCACCCTTGAGGTGGAGTCTTCCGACACCATCGACAACGTTAAGGCTAAAATCCAGGATAAGGAAGGGATTCCACCGGATCAGCAACGATTGATCTTCGCCGGCAAGCAACTTGAGGATGGCCGAACTCTTGCAGACTACAACATCCAGAAAGAATCAACT…
Novel_G000035	Novel_T000580	CCACTTTGAAGACATTTGTTGAAGGTGAGTTACGCGAACTCTATTCTAGGTATATTTCCCTAGATGCAAAGGTAGATACTCTTTGCATGGAATGTCGTTCCAAGCACTTTGGTGGAGACGGTCCATCCACCAGTACACACACCGCTGTGCAAGGCACTACTCACATAAAAGTGCCGAAACCTGACACATACAATGGGGTGAGGAATGCCACGGTTGTGGAAAACTTCCTCTTTGGCCTTGACCGATACTATGTAGCTGTCGGTGTTCGAGATGATGAGGCCAAGATAAACAATGCCCCGACATTCCTAAGGGATGCCGCACAACTTTGGTGGCGTCGAAGATACGCTGACCAAAATGGGAATGCCATCCAGACGTGGGAACAATTCAAGGCCGAGCTAA…
Novel_G000036	Novel_T000581	CCACTTTGAAGACATTTGTTGAAGGTGAGTTACGCGAACTCTATTCTAGGTATATTTCCCTAGATGCAAAGGTAGATACTCTTTGCATGGAATGTCGTTCCAAGCACTTTGGTGGAGACGGTCCATCCACCAGTACACACACCGCTGTGCAAGGCACTACTCACATAAAAGTGCCGAAACCTGACACATACAATGGGGTGAGGAATGCCACGGTTGTGGAAAACTTCCTCTTTGGCCTTGACCGATACTATGTAGCTGTCGGTGTTCGAGATGATGAGGCCAAGATAAACAATGCCCCGACATTCCTAAGGGATGCCGCACAACTTTGGTGGCGTCGAAGATACGCTGACCAAAATGGGAATGCCATCCAGACGTGGGAACAATTCAAGGCCGAGCTAA…
Novel_G000037	Novel_T000592	AGTGAGACTGATTTCTAAACTACAACATAGGAATCTTGTGCGTTTGTTTGGGTATTGCATCGAAAGAGAAGAGCAAATGCTAATATATGAGTACATGCCCAATCTAAGTTTGAATGCTTTAATCTTTGGCTCTTCCAAACGTGAAGTACTTTTGAATTGGAGACAGAGATTTAACATTATTGATGGAATTGCTCGAGGCCTTCTTTATCTTCATAGAGATTCAAGAGTAAAAATCATTCATAGAGATCTTAAAGCAAGTAATATTTTGTTAGACCAAGATTTTAACCCTAAAATTTCAGACTTTGGCTTGGCAAGAATTTTGTTTGACAATGAAATCCAAGCCAACACTCAAAGATTCGCTGGAACTTTTGGATATGTGTCTCCTGAATATGCAATGGA…
Novel_G000038	Novel_T000724	CCCTATTTGGTCAGAATATGGTTATCTACATTTCAATGGTCAGTTAGGCCATTTTCAAACTGTGCAAAACCAAAACCATGTGAACCGTCGATCTCGCTCCACTTGGAGCATTTCATTTTGTGAAGGACTACTGCTACACTCGAAGTGAAGGAGTACTGCTAAACTCGAGTGTAGCAGTTCAGGCAGTGATCGGAGACCTTGGTAAACGAATTTATCTTCCTTTGGATCTTCTCAGGAAATGATTACACCAATAGGAGTAGCATTTGCAGTGGGTTTTCTTGGATGGGTTTATCAATCACTGAAACCTTCACCTCCAAAGATATGTGGATCAGAAAATGGCCCTCCAGTGACTTCACCTAGAGTAATGCTCAATGATGGAAGGCATTTGGCCTACAGAAT…
Novel_G000039	Novel_T000725	TTTCAAACTGTGCAAAACCAAAACCATGTGAACCGTCGATCTCGCTCCACTTGGAGCATTTCATTTTGGACTACTGCTACACTCGAAGTGAAGGAGTACTGCTAAACTCGAGTGTAGCAGTTCAGGCAGTGATCGGAGACCTTGGTAAACGAATTTATCTTCCTTTGGATCTTCTCAGGAAATGATTACACCAATAGGAGTAGCATTTGCAGTGGGTTTTCTTGGATGGGTTTATCAATCACTGAAACCTTCACCTCCAAAGATATGTGGATCAGAAAATGGCCCTCCAGTGACTTCACCTAGAGTAATGCTCAATGATGGAAGGCATTTGGCCTACAGAATATTTGGAGTTTCAAATGAAGAGGCTGAATACAAAATCATTATGTGCCATGGCTTCAA…
Novel_G000040	Novel_T000825	ATTTCATTCCCAATTTTTTCTTATGTTTCTATTTTCATTCTCATTTATTCGACTTCTCTCTTCCTCACTTCATTCTTCTTCACGATTTTTCCCATACGTTTCTCCTCCTCAGTTTCTTTTAATTCCTCTTCTTTTCTCTTCATTTTTGTCCATCGTTTTTCGACAAGGGTGTGCCTCTCTAGCGGCTTTTTGGTCCTCTTCGCTTTTCTTCGGCCAAAGCGTTCCTCTCCGACGACTCCTTTCTTCAGCTCTCCTCACTTTTCTTAAAGGTCATACTATTTCTCTAGCTTTTAATCGGGTTTTGAGAAAGGTTTGCAAGCTTGGACTAGAAATTATTAGTCCAACCAATATGTACACTATACCAATGGAGATTATATCAAATTCAAAATATTACCCTTT…
Novel_G000041	Novel_T000826	CTTATGTTTCTATTTTCATTCTCATTTATTCGACTTCTCTCTTCCTCACTTCATTCTTCTTCACGATTTTTCCCATACGTTTCTCCTCCTCAGTTTCTTTTAATTCCTCTTCTTTTCTCTTCATTTTTGTCCATCGTTTTTCGACAAGGGTGTGCCTCTCTAGCGGCTTTTTGGTCCTCTTCGCTTTTCTTCGGCCAAAGCGTTCCTCTCCGACGACTCCTTTCTTCAGCTCTCCTCACTTTTCTTAAAGGTCATACTATTTCTCTAGCTTTTAATCGGGTTTTGAGAAAGGTTTGCAAGCTTGGACTAGAAATTATTAGTCCAACCAATATGTACACTATACCAATGGAGATTATATCAAATTCAAAATATTACCCTTTCTTTAAGGATTGTATTGGT…
Novel_G000042	Novel_T000827	TTTCATTCTCATTTATTCGACTTCTCTCTTCCTCACTTCATTCTTCTTCACGATTTTTCCCATACGTTTCTCCTCCTCAGTTTCTTTTAATTCCTCTTCTTTTCTCTTCATTTTTGTCCATCGTTTTTCGACAAGGGTGTGCCTCTCTAGCGGCTTTTTGGTCCTCTTCGCTTTTCTTCGGCCAAAGCGTTCCTCTCCGACGACTCCTTTCTTCAGCTCTCCTCACTTTTCTTAAAGGTATGTGTTTGTTCTATTTTTTTTATTGATCTGTTTGCTGCCATTCTCTTCCTCCCTTAAATTTAGAGTTTTGGGTAAATTATAGTGAAAATTTATGGGTAAATCTTTGATCTTCTGTTTGTAGTCTTCTCTATCTTTCTTTTAATTGGGTGTGGAACAAAT…
Novel_G000043	Novel_T000828	GGTGGGGGGGGCTCCGTTTCCGTGATTTATAAATTAAGCAGGAATTGATGTTGTTCACTTTGTGAAGTTGCATTGTGTACTGTATGCATATACGAGAAATTGTTATTAGAAGTACATCTCATTTTGCAAAATACTTTAATCATGGCTATTGAAACTTCAACCTGAAATTCTCCTTGATTTGATCTTGGATATACTTTGTTCCTTTGTGCCGATCTTAATTTACTTCTAAACATCAACAGAGGATATTATAAGTTGATTCAGTAAAACCAACAGAAATATAGACCCTTGTGGAAACCCAATGCTTTCTTCCACCCATATTCATTACTAATTATATGATCTTTATTTTTCTTAACATATATGTATAATTAAGGCTTTAATATAATCACCATCATATATAGC…
Novel_G000044	Novel_T000837	CTTTGAAACCGATCCCGACCATCTCAGATATAAACCAAAAGGAAAGAATCGATATGCCTCTGCAGAATTCTACTCCAATTCCTGTTCTTGACTTAAACCAGAAGGCAAAGACTTCTTCTAGGAAGAAAGCCAGTCAACATAACTCGACCCCGGTTTTCGACTTGAACCAGAAGGAAAGAATGTGCAGTGGGAGAGATGCTAGCGAGAGAAACATCACTCCATTTTTTGACTTGAACCAAATTTCGATAGAGGAAGAGGAATTGCAGACCCATTACGAGCCGCTGAGAGTTGATGAGCTGAAGAAAAGCCTTCTTCGAGGAGGGAACGATGAGCAGCAAAACGATATCAAGATTTCTGCATGCAGGAGTATTGGAGATGGTCCAAGTCGAGCTGGTAAAA…
Novel_G000045	Novel_T000865	ATCGATCATGGGCCTTTACACAACACTTTCTTATTCTCTATCTTTATTTATATCTCTCCTTATCTTTCATCCAAATAATGTTTCAATCGCAACCCAAACCACATACTTTCTCGCATTTCCAAGAGCTTCCACGATAGCATTCGGTGATGAAAATCGGTATTGGAATTGGACCCACGTGGAATATGGCGGCTACACAATTGAAGAAGCCCATCTTCATCCAATATCTTGGCTCGATTGTCGTTGGAACTTGCATTCATCTAATTTCAAACTAAATACTTGGTACAAAGCACACATTGATGTAAAGTTAACAAGTGATGCCTTTGGATGGACTTCTCCCGTGAACGCTAAAATTGAGATGCCAGATGGGAGTAAGCAAGAGAGTCTAATAAAATTAGATAG…
Novel_G000046	Novel_T000885	GCGTCTTTAAAGGCCAAACCGCCACGTGTCCGCTCTTATCCGTTCACAGTTTCTTCCATTTTTAAATCCCCACCCAAAAGGTACTCTAAAAAAGCAACACCCTATTTCCTCTCTTTTTCTACAAACCACCTTCCCATCCTCTCTCTCTCTCTAAAATGGCCACTAATCTCCTCACTTTCCCCCCTGCCGGAATCCGTGCCTGTGCCTCCTCCGCCGACCGCCGCTCAGACCATAGCCGTCGCAAAACCTCATCCTCTTCCAACTGGTGGGCCCCCGTCTTCGGCTGGTCCTCCGAACCCGACTATATTGACTCCGGCAACAAGGCTGAACCTCAGAACCTTGCCGGCGGTTCTTCCAAGCCAGATCTGGAGACGAAATCCCTCAGGGGTCGATTTTCCC…
Novel_G000047	Novel_T000887	AAATATTCCCGGTTGTACTTCGTTGTTGCTCTAGCACATTTTCCTCATTTCTGTAGGGAGCTTTTTTCCCTCCTGCAACAATGTTAAATTTCTATTTTCTTTTTGTACATTTATTTGATCTGATAGATTATTTTATCTTTACAATCTTGTTATCCCTTGGTAGTATTTTTACGATGGTCCTTTATTTCTGTTAAGTACTGTTCTGATTTCAATTTCCTCCTACTGATGAAGTTCCTTATTTTGTGTCTTAATTCATGATTGCAGCATCCATGGGCAATGTGCAATCATCATGTTTGATGTTACTGCTAGATTGACATACAAAAACGTCCCTACATGGCATCGTGATCTTTGCAGGGTGTGTGAGAATATTCCAATTGTTCTTTGTGGAAACAAGGTGGA…
Novel_G000048	Novel_T000897	TTTGGAACCAAACGCCCGCCGTCGACGTTGGAGACATTTACTAAGGTACGTTTAAGTTGTATTTGAAGTCATTAGAGCCATTGAAGGCTTTGGTGATTGATGAAGCAGCACAGTTGAAAGAGTGTGAGTGTGTTATTCCAATGCAACTGGCTGACATAAAGCATGCAATCCTCATAGGTGATGAGTGCCAATTGCCAGCATTGGTTTAGAGCAATAATGCATCCATCCATAAGCCTTTTCCCAAACTCAAAATTCTACTCAAGTCAGATCTCAGATGGTCCTAATGTCAAACCTAAAGCCTATGAAAAGACGTTTATTCTCGGACCGATGTTCGGTTCGTATTCTTTCATAAACATAAATGGTGCACGAGAAGAAAAGGATGAAATTGGACACAGTTTG…
Novel_G000049	Novel_T000898	CTTTGGAACCAAACGCCCGCCGTCGACGTTGGAGACATTTACTAAGGTACGTTTAAGTTGTATTTGAAGTCATTAGAGCCATTGAAGGCTTTGGTGATTGATGAAGCAGCACAGTTGAAAGAGTGTGAGTGTGTTATTCCAATGCAACTGGCTGACATAAAGCATGCAATCCTCATAGGTGATGAGTGCCAATTGCCAGCATTGGTTTAGAGCAATCATGTGTTGACTCAAAAGGAAAGATGAGCATTGGTGTAGTGTCCCCATATTCAGCTCAAGTCGTTACCATTCAACGCAAAATTGGGAAGAAGTACAATTGTAATGGATTTAATGTGAAGGTGAGTTCAGTTGATGGCTTTCAAGGAGGGGTGGAAGATATCATTATTATTTCCACTGTTTGGT…
Novel_G000050	Novel_T000899	GTCCATCTTTGGAACCAAACGCCCGCCGTCGACGTTGGAGACATTTACTAAGGTACGTTTAAGTTGTATTTGAAGTCATTAGAGCCATTGAAGGCTTTGGTGATTGATGAAGCAGCACAGTTGAAAGAGTGTGAGTGTGTTATTCCAATGCAACTGGCTGACATAAAGCATGCAATCCTCATAGGTGATGAGTGCCAATTGCCAGCATTGGTTTAGAGCAATGTAAGAAAGTTTCTCCCTTTATTTAATCATATTTGTTTTAACATATATTGACACTTCGATACACATTTGTTAAACATGATAAATACCTTTTGAACACTCACGTACACATATGGATAACCTAAACATTTCATAGACTTAAAATTCCCATACCCTATTTGAGAGGCTAAGCTCATTGGG…
Novel_G000051	Novel_T000909	CTTGTTGGCTTCTTGATCAAAATGGTGAGTATGCATCACAGTTACTATCAAGAACACTCTGTCAATCCTCGTGATTCTGCTGTTCGTTCCAACATACACCCGGTCTGAATGCGTGGTAAGCGGGTTAAGATTGTTCCTTCACGCCGTCCGTATGTTCGCCTTGCTGATCGAGGTAATAACAAAGTACCAGTTCCTTCATTTTTGAAAGGAAAAGGGCCTGTGACTTCGAGCAGCCTCAGAGTTTATCTGACTCTTCTAGTAGTTCATCAGATCCTTTGCCCCAACAGCATCCCTGGACCCCTCATTCTGGGCACATTTCGACTATTTGTCCATCTCATGATATTCCAACTGGGCCCACTGCTCCTTCCCCATCCATGGGTCGTGAATCTGTCCTTCCTC…
Novel_G000052	Novel_T000973	ATTTCACTAAAAAATGACACAAACCAAAGATATTTTCAAAATTAAGTCACATTTTCTTTGGACATCTTGAAATATCGATCATAAGCCAAATCAACGGTGTCACGTTCCATCAAAGCCTCCCTTCAATCTCTCACCAGCGTCCCTCCATGGATGAAAGCGATAGCTATAGCACATGGGACCTTTTTTCTCTGAAAAGAACGGTCATGGCTGAAGCAACGAGTTCCCTGTTTCCTCACTTTCACTGTTAATCACTGCGAAATGCCTTGAACGAGAGTTCATACATTTTCACTGAACTAGGCTATGGTTTTCGTTTTTCTTTAGCTTTTCACGAACAGGCGATGAAGCTAATTCTCTAAGCTAATGGAGCTGGTTACACATAGTGCTGCATCGTTGTTTTCA…
Novel_G000053	Novel_T001012	CAAAACTTGAATTCATGTTTCTCCAAACTTCTCCTTTCAGTTTTGCTTCAACAATGGACATCTCCTCCATTGCCCTCCAATTTTCATCTCAACCATCATCCTCATCCCTTCTTCTTAAGACTCCTACATCCTCACCCACTGCCACTACTAGAAGGAACTTCTTGCCATCATCTCAACTTCCTAACCCATTTCTCCAAATTTTCCCTGGAAACCACTCTTTTCTCCACTTAAGCATCCCAAAATCCTGCTCCCTCAGACTCCCTAAAGAACCCATTTCTGCAGAAGCTTGGGATCTTGGTAGGTTTTTGAGAACATTGTACTTTTTCAACGTGCCTCCATCTCCATCCAAGTTTTTTGAGGCTCTGATTGCTCAACTGTCGGGTCCATCGCCGACCAAAC…
Novel_G000054	Novel_T001013	GGCTCTGATTGCTCAACTGTCGGGTCCATCGCCGACCAAACCTGTTGAAGAAATGGAAACTTCTGGGTTCATTCTAGTCGCTGGAGCAACAGGTGGCGTTGGGAGAAGGGTGGTTGATATCCTGAGGAAAAAAGGCTTGCCAGTTCGAGCTTTAGTATATCAGTCTTCCCATTTTCAGCTTATTGGTTTTCTATTTGTTGTGCTTTCATCAAATTCAAACCGCATGCTATTTGTACAACTTTTGAGAAGAGACAGAATAAGTATTGATAATGATGTCTTTTTTCTTTTTCTCAACGGTTAGTTTTATTTTATTTTATCTTTCAGGTCAGAAATGAAGAGAAAGCGAGGAAGATGTTAGGCCCAGACATTGGATTGATTGTTGGGGATGTTACGAAGGGG…
Novel_G000055	Novel_T001014	GCGCTTTTTTGTGGTCTCTATTTGTTTCTAATTCTCAGTTATCAAATATCAACAACAGACCTTGAACTCTCTTCTTTCATTTTTGCTTCAATCAATAATGGAAATCTCTTCCCTTGCCCTCCAACTTTCATCTCTACCGTCCTCCTCCTCCCTTCTTCTTAAGACTCCTTCGTCATCACCCACTACCACTACTAGAAGGAGTTTCTTCCTATCATCTCAACTTCCTAACCCATTTCTCCAAATTCTCGCCGGAAACCACTCTTTTCTCCACTTGAGCATCCCACAATCCTGCTCCCTCAGACTCCCAACAAAACCCGTTTCTGCAGAAGCTTGGGATTTTGGTAGGTTTTTGAGAACCTTGTACTTTTTCAATGGCCCCCCATCTCCATCCAAGTTTTT…
Novel_G000056	Novel_T001015	GCGCTTTTTTGTGGTCTCTATTTGTTTCTAATTCTCAGTTATCAAATATCAACAACAGACCTTGAACTCTCTTCTTTCATTTTTGCTTCAATCAATAATGGAAATCTCTTCCCTTGCCCTCCAACTTTCATCTCTACCGTCCTCCTCCTCCCTTCTTCTTAAGACTCCTTCGTCATCACCCACTACCACTACTAGAAGGAGTTTCTTCCTATCATCTCAACTTCCTAACCCATTTCTCCAAATTCTCGCCGGAAACCACTCTTTTCTCCACTTGAGCATCCCACAATCCTGCTCCCTCAGACTCCCAACAAAACCCGTTTCTGCAGAAGCTTGGGATTTTGGTAGGTTTTTGAGAACCTTGTACTTTTTCAATGGCCCCCCATCTCCATCCAAGTTTTT…
Novel_G000057	Novel_T001016	GCGCTTTTTTGTGGTCTCTATTTGTTTCTAATTCTCAGTTATCAAATATCAACAACAGACCTTGAACTCTCTTCTTTCATTTTTGCTTCAATCAATAATGGAAATCTCTTCCCTTGCCCTCCAACTTTCATCTCTACCGTCCTCCTCCTCCCTTCTTCTTAAGACTCCTTCGTCATCACCCACTACCACTACTAGAAGGAGTTTCTTCCTATCATCTCAACTTCCTAACCCATTTCTCCAAATTCTCGCCGGAAACCACTCTTTTCTCCACTTGAGCATCCCACAATCCTGCTCCCTCAGACTCCCAACAAAACCCGTTTCTGCAGAAGCTTGGGATTTTGGTAGGTTTTTGAGAACCTTGTACTTTTTCAATGGCCCCCCATCTCCATCCAAGTTTTT…
Novel_G000058	Novel_T001017	TTTTTGTGGTCTCTATTTGTTTCTAATTCTCAGTTATCAAATATCAACAACAGACCTTGAACTCTCTTCTTTCATTTTTGCTTCAATCAATAATGGAAATCTCTTCCCTTGCCCTCCAACTTTCATCTCTACCGTCCTCCTCCTCCCTTCTTCTTAAGACTCCTTCGTCATCACCCACTACCACTACTAGAAGGAGTTTCTTCCTATCATCTCAACTTCCTAACCCATTTCTCCAAATTCTCGCCGGAAACCACTCTTTTCTCCACTTGAGCATCCCACAATCCTGCTCCCTCAGACTCCCAACAAAACCCGTTTCTGCAGAAGCTTGGGATTTTGGTAGGTTTTTGAGAACCTTGTACTTTTTCAATGGCCCCCCATCTCCATCCAAGTTTTTTGCGT…
Novel_G000059	Novel_T001034	TTTTAACCTTCAAAATTTCCAACTTTATTAATTATTTTTCTCTTTCTTTTTTATCAATTTGTCATTTCTTGCCAATTTTGCTTAAGAATTTCTAGGCTTCCTTCTCCTATTTCTTTCTCTCTCTCTCTCTCGATCTGAGAATTGATCATATCATGTCAACCGAAGGAAGAAAAGATCCGACTGAAGCCGGGTCATCGTCGAGGGCGACGACGACGACGGCGGCGTTGAGTCGGTACGAATCACAAAAGCGACGTGATTGGAACACGTTCGGACAGTATCTGAAGAATCAAACGCCGGCGGTATCACTGTCGCAGTGTAACTGCAACCACGTGCTTGAATTCTTGAGGTATTTGGACCAGTTCGGAAAAACTAAGGTTCATTTACATGGCTGTGTTTTTT…
Novel_G000060	Novel_T001087	TGGTAGTACACTCACAACTTTATTTGATAGTACAATTTCAACTTCATTATTTCATTGCAATCCAAACAAAATGTACCAAAAAGAAAATGGAAACTCACATGACATTTTATTGGGGAAAGACGATAGAGATCCTCTTCCCCGGTTGGCCTGGTCGGAGCTTTTTCTCCTCAGTCATCGTTTTAATTTTTGTTTTTCTCCTTGCCTTCACCGTGGAGTGGCTCTCACACACTAAATTCACCACCTCCGCCATGGACAACCTCACTGCCGGCCTGGTTCAGACCATTCTTTACGGCATTCGAGTGGGGTTGGCTTTCATCGTTATGTTGGCGGTCATGTCATATAACGTGGGAATTTTGCTAGCGGCAGTGACTGGATATTCGATCGGGTTCTTGGTTTATG…
Novel_G000061	Novel_T001088	ATCCTCTTTCCTGGTTGCTTTTTCTCCTCAGTCATCGCTTTAATTTTTGTTTTTCTCCTTGCCTTCATCGTGGAGTGGCTCTCACACACTAAATTCCCCACATCCGCCATGGGCAACCTCACTGCCAGCCTGGTTCATACCACTCTTTACTACGTTAGAGTGGGGTTGGCTTTCATCATTACGTTGGCGGTCATGTAATATAATGTGGGAATTTTGCTAGAGGCGGTGATCGGATATTCGATTGGGTTCTTGGTTTATGGGAGTAAGATATCTAGTCGATCGAAAATTGATCTGTATCTAAATTTAGATTCTCTCGATCTTCCACCACTCAATTGTTAGTATAGAGAATTAATTAAGATAGCTTGTTTTGTTTTAATTTATATGAATTTCAATTTTTTA…
Novel_G000062	Novel_T001203	TTTTGAAAAAGGCAAACAAAGTTATGAATGTGTGTGTGTGTATGTATGTATATATAGTAACCCCACCTTCATCACTACCCATTACTTCATTCCCATCAAATTCTCTCTCTCTCTCTCTCTCTTTGTTTGTTTTGTGTAAATCAGAAGAAGAAGAAGAAAGAAAGAAAGAAAAAGAAAAATGGCAGACGAAGGAACAACAAATTGCATCGATATCCTCCTCGCTATTCTCCTCCCTCCTCTTGGTGTCTTTCTCAAATTTGGATGCCAAGTTGAGTTTTGGATCTGCTTGGTCTTAACTTTCTTTGGTTACATCCCTGGCATTATTTATGCTGTTTATGCCATCACCAAGTGATCATCCAATTCAAAGGATTGATGCAAGAAATTATTGGAACTCATCAT…
Novel_G000063	Novel_T001204	GACATTTTAGTATATGTAAGTGTATCAAATGGATTTTTTTTGGACATTTCATTAGCTTGGACTTGTTTTGGAATGAAGTAATACTTTGGTGGTAAGAACGCTTTGCTATCGGAGAGCGTGAAAGGAGACTTCTATACCGTACTGAGTTATCGCGGAGGAACTGCTACACACTTCTCCTCATTTTGGCGGGAGAATCAGATGTTATCATTTTCCTCCCGCTCGGTCCACCGTAGTGTGTTGTTTGTATAATTTTCCGTCCATCTTCTTCTTCCTCTTCTTCTTCTTCTTCTTTCCCGCTGTTCTGGCCAAAATTTGTGTGCAAGATCTATCAAATTGGAAACTGCTAGCGGTTATCGCTTAATAGGACAGTGTCGAGTGGGGAAGTCGGCGTAAGCAACC…
Novel_G000064	Novel_T001217	CGAGGATGTGGTGAAGATTGAAGTTGATTCTCACCGAAGATCCATTCTGCCAAGGTTTGCTTCTTAAAAATTAAATTTATTTTTCATTCACATTGTTTTCCTGATCAATATAATTTTAATTTATTCATCATTATCAATCAATTTTTTCTTTCTTTCATGATCCAGAAGCAGCCAACTTAGTAACCAATTAGGATTAGAAAGAACTGTAATTGGATATAAAAATTTGAAGCTCAAGCTATCTTTCATTAATCAAATAGCTCCCACCATTTTCACCAACAATGAAATAAAAGCCAAAAATGGAAAACCACTAGTAGTTGCAATTTGTGATAATACTACCAACTCCAAAGCTATCATCAAGACAGGTATGTTGTCGAGGGCCTTGGTTGAGTTCGTCGTCCT…
Novel_G000065	Novel_T001218	TCTCACCAAACCCAAAAAGCACTTCCTCTTCTATATACATACTACTTTCTTCCTGATCTTCATATACATACCTTGTTGTTTCAATTATAAAGACATCAGTCATGGACTACCTAAATACAAAAACCTTCTTCCGTCCTGATCAAAATTATCAGACAACCTCCTCCCACTTCTCTTTTCCATTTGGGTTTGGGGTTGGAGATAATCATGAGGTTTTGTCTCCTAATTCTGTGGCTTATGTTGAGAATTACTTTCGCCCCATGATACGAGAGGAAGTGGAGGCAAAGATTAATGCTCGCTTTAACGTCTCTACCAATTACCAATCATGTTCTAATTCAAGTACTAGTAGGGAAGGAGTACTTGGTGAAGATCGTGCAGTTGTTATTGTTGGTGGAGGCCGAT…
Novel_G000066	Novel_T001261	GGGAGAGTTCAATTTGTTTTTCATTGTTACTCACAAATTTTGATGGCCAATTCTCTCTTTAGATTGTTCACTTTATTCTTCTTTGTTCTCATTTCCATCTTCCTCCTTCATCCCAATGTTGTTCTCTGTGATGTGAAAGATGATAACATTCTAAATGCCATTAACGAATATAGGGAATCAAAGAATCTATCAAGGCTTTCTTATAACAGAAATGCAGCATGTTTGGCTGGTAAACTCGTTTATAAGCTAAGAGATGAGCCTTGTTCAAGTGCTGAAAATTTCAACAAAGAAATTAGCTCAGAAACTAAGCTTGCAGATTTCCCTAAGCTCTTACGAAAATGTCACATAGCCTACAACTCCTCCGTTGACGGCATCATTCTCCCCTCTTGCGTCCGTGGA…
Novel_G000067	Novel_T001384	CTTCTCTTCCACTTCTTCTTCAATTTCTTTTGATTTACATTTCTCGTTGCTCCCGGAGAAGAGAGACTGTCAGGAGCTCGACGTTTTCCGGCGAACGATCCTGGGCTTTTCTTCCCCTCCTCCGACTGCCTTGCCTTTTCGTTTCGAAGGAAAAAGCATGGCTTGTGTATACATACCGGTACAGAACTCGGAGGAGGAGGTCAGGGTAGCTCTCGATCAACTTCCCAGAGATGCTTCCGACATTCTCGACATACTTAAAGCCGAGCAAGCTCCGTTAGATCTTTGGCTAATCATCGCGAGGGAATACTTCAAGCAAGGAAAACTAGAACAATTCCGCCAAATTCTGGAGGAAGGGTCCAGTCCAGAAATTGATGAATACTATGCTGATGTTAGATATGA…
Novel_G000068	Novel_T001415	TTAATGCGCCAAACGAAATGAGGGAATCGAAGCTTTTGGACTTTCCCACTGGAGAAGAAGAATAAGCTTGTGCGTGTGCCTGTGCTTGCAACTCCTCTCTTCAACCCGACACCACCGATTACTCGAAAGGGGGTGTATTCTGCTCATTCGTATGCTGCTGCTTCTGGATCCTTGCAGGTCAGCAAATGGATGCTTTGGTGGTGGTTTTCTAGCACAGGGAATTTGGTTGTTTGGAAACTGGTATCGTCGTGGAAGTTGAACTCTTAGTTATCTGAAGTGATGTGGACGAATATTTTCAAAATTGGTGGTCTACATCAAATATCATGGTTCCAGTTTCTTCCTAACGAATCTGATTTGATTACCTTACCAGACAAAAGTGCGAAGGTTGAGCACAATGAT…
Novel_G000069	Novel_T001416	AAAAAATTATAATGTTGAAGGCTTAATGCGCCAAACGAAATGAGGGAATCGAAGCTTTTGGACTTTCCCACTGGAGAAGAAGAATAAGCTTGTGCGTGTGCCTGTGCTTGCAACTCCTCTCTTCAACCCGACACCACCGATTACTCGAAAGGGTCAGCAAATGGATGCTTTGGTGGTGGTTTTCTAGCACAGGGAATTTGGTTGTTTGGAAACTGGTATCGTCGTGGAAGTTGAACTCTTAGTTATCTGAAGTGATGTGGACGAATATTTTCAAAATTGGTGGTCTACATCAAATATCATGGTTCCAGTTTCTTCCTAACGAATCTGATTTGATTACCTTACCAGACAAAAGTGCGAAGGTTGAGCACAATGATGCTGCCACATTCTTGGTTCTTTCAT…
Novel_G000070	Novel_T001440	CAAATCCATCAATCCATCAATCCATCAATCTCTCTCTGATTTTTAACTGAAGAGATCCTAATGGCCACTGTTGGAGGTATTAAGGAAGTCCCTTCAAACGAGAACAGCATCGAGGTTGATGAACTTGCTCGTTTTGCTGTTGACGAACACAACAAGAAAGAGAATTCACTTCTGGAATTCAGCAAGGTTGTGAAGGTGAAGGAGCAGGTGGTCGCTGGCACAGTTTATTACATAACTGTTGAGGTAACTGAGGGAGGTCAGAAGAAGGTTTATGAAGCCAAGATCTGGGTCAAGCAGTGGCAGAATTTTAAGCAGCTTCAAGAGTTCAAGCTTGCTGGTGATGGCTCTGTGGGCTCCTCTGCTTAGTTTGCTAGGGTCCTAAAATCCACGATGATATGC…
Novel_G000071	Novel_T001515	GGAAAATAGCTTTCTCTTTTTCTTTGTTTCCAAACTTCCGAACTTGACAGCTTGTTTCTGTTCAGTGTTCACTCTTCAATGGCCGCCGACAACAAACCCTCCGCCGGTGGCAAGAAGAGGAAGCAGCGTTTTCTCCCCCACAACAAGCCAGTAAAGAAGAAGGGTCATTACCCATTACGCCCGGGGGTTCAAGGTTTCTTTATCACCTGTGATGGCGGCCGAGAGCGCCAAGCCTCCATTGAAGCAATCAACGTTATTGACTCCTTTTTTGACGAGTTAGCTCTTGGAAAGAACTGTGGTGTGAAGCTGACAGAATTAGCTGATAAACCTTTAAACAAAAAAATTAAGTTTTCAGATTCTGAGTCTTCTAGTTCAGATGATGATGATGATGATAATGAT…
Novel_G000072	Novel_T001535	TTTTTGCTTTACTCTATTCCAAATTTTCCGATTCATCTCTCTCTCCTCCGCTCCCATTGCTTCACTTCTCCAAATTCCAATTCCAATTCCAATTCCAATTCCACGGAGCTCAATCATCCCTTTCTTTTCCTCCTTTCTCCCACATTGTTCTTTGTTTTCTTCCTCTCAAGCTTTCTCCAGCTCCACGACCTCTTAACCATCTGATTGCTTAACTTTTCCCACAGTTTTTCGATCAATTGGGGTTTGCAGGAGGATTCAAGAAAAGGGTAGCAGCTGGTTTGCTGGAGTCTTCACTCTCTTAGTTTCCCTTCTTGCTTGACCTTTAGTGCTTGCTTTGTGGAGAGCTTGGACGATTAGTGTACGTGGACTGACGGAGTGGCTGTTGTGATGATTGATTGA…
Novel_G000073	Novel_T001590	TTCAAATCAGTTTTTTCTCCACTAGAACGCGCACAAACTCGTGATAGCGGCGCGCCATAGCGCCGTATATGGAAGCTTGAAAGAAAGTTCCCAGAAAAAAAGTTCACGGAAATACTCATCGCCAAGGAGAGATTGAGCGCGAAGCAAAATCTGGAATATAGGGGCAAAGAGTAATTATGCATTACAAGAAACAACCCTGCAGAGATTTTCAGCGTGGCACTTGTCAGTATGGTGAAAGGTGCAAATTTCTCCACGCCACTCAGCAAGCACAACAACAAAAACCTAATCCCTTTGGATTTGGAGTTCCTAACAACGGTCAATCTAAAGCGGTTGCTGATTTTGGATCCAAACAAAACCAATATAAGCCATTTGAAAACAAGTGGACTCGTCCTTCCACCC…
Novel_G000074	Novel_T001671	ACAACTCCGCCACTCACCCGTTTCCCCACCCCTCCTAACGGCGTGCGTTTCAATTCAATTTTGTTCATCCCGAGCGCCAAACACTTGCTACAACTCAAGAAAAAGGATAAAACATCAGAGAAGAGTTGATAGTAGAAAGAATCGGGTACATCATTCTTCAACTTTTGAATTTCATTTCTCTCATTCTTCTTTCGAAGTTTTCTTGAAAAATGGAGATTGGATCGGGTGCCATTGCCTCTTCCTCCAAAGAGCACCTTAAGATCTTTCACGAATGGTTCGGTTTGGCCGATTCAGATGGAGATGGTCGTGTTACTGGAAATGATGCCATACAGTTCTTCTCCATGTCTCATCTTTCTCGCGCCGAGCTCAAACAGGTTTGGGCTGTTGCAGACTCCAAAC…
Novel_G000075	Novel_T001739	TCTAGGTCCAAACAATGAGCTTCAAGCCCATAAGTCTGGGGCGCAATCATCGCAAGGCATGGAAATCCCGCCGCAAGGACGGAAAGAAAGAAACCAAAAGAAAAAGAAAAAGAGAAGGAAAAGAACCCTAAAAATGGCAGTGTTCAGCGCATAGTCTTAAATGGTCTCCCTGTCTTCTTCGTCTTTCGATATCCATTTCATAATTGCTCGTGCCTATGGCTTCTAGCAGCTCTTCTCCCCATTCTTCTTCTCCTTCTTCTTCTTCTTCTTCAGTTGCTATTTATTCAAGTCAGTTCTCCGTTTCTTTTGGTCCGGTGTTGCTCTTTCTGTTCTGCAGGGGAGGTTTTCAAGAGGTTTAATGGCGAGGCTTATTCGAAATGCATCTTTTCTTGGGCGCTC…
Novel_G000076	Novel_T001836	CCTAACTGGACTAAACCCAACTTTTCTTCCAAATCTCCCAAAAACCCATTTCCCTTTCTTCTTCTCTCTCTCACTGTCAGGCCCATCTCTCTCCTCGACCTTCCTTCTTCCTCTTCTTCTCCTTCTCCTTCTGCTCCTTCTCTCTCTATCTGCATTTCTGTTCTCCCTATTCTCTATTTCTCTTCACTTTTGAGCTCCTTTTTCCGGCAATGGAGTTGGACTGTGTAAGCTTCGTGGAGAGGACCATGTGGGTGCGCTCTGTTTTGGAAGCTATGGCGGTGGACACTGTTTTCACCACTGCAAACTCCCTTGCTTGCCTTCTGGCGGCGGCAGGAGCTATGTTAAATATTGCTAATGGTACACCAGGACTGGCAGCAATTGAGGAAAGGTTTCCTTTCT…
Novel_G000077	Novel_T001863	AATGAATTGTGAGATTCCAAATTGGTGTAGGTATAAGAGTATGAACAATTCATTAACGTTTCTTTTTCTAGTCATTGATTATCTAAGTTGGAAAAAGAAGACTTTTATTGCTCCTTGTGTCAAATTTCAAGTTACAACTATTGATCACGAGCGAGTTCAAATTGAATGTAGAGTGTTTATCAACGATATTGAAGTATGGGGTGGAATGTCAAGTTCCATTTTTGACTTACGACTTATATCTGGAAAAATATCACGAGGTGAGTATTTATGGATGACAGTACTTCATCCTTGTAGACATCGTCTCAACTCATGTGGTGATGATATTATGGACAGCTCACCCAATTCTTCAATAGGTATGTTGGATAAAATTAGAGTGTTATTTGAGATTAATTATCCAAA…
Novel_G000078	Novel_T001885	TCTTTCTCAAAAGTTTCGATAACTTTTTTATTATTACTATTAGCACGAAATGGAGTGCGATTCATGAGTGGCTGAAATGGAGCGCGAGCAAAGCAAGAGCTCATGGGTACCAGCAGCCGATTATTCTTCTCTCTCTCGTTCATGGACCCACATGAGCTCACAATTCTTCATAATTTTAAGCTCCAGGCTCGCCAATGTCCCACTGTAGTTTCTACTTTATCAGCACTTTTTCTGTTCGCTTTTTCCAATGCATTGTTTATTTATTATTATCTTTGATTAATACTAGCACGCGTATGGTTCTCATTGCTCAATTATGAATGAGTCTGTGGGACACTGTTCCCTTTTTACTCACCCTGCTTTTGTCTGATTCCTTCCGGACAGTTCTTTGATACGTGTTCC…
Novel_G000079	Novel_T001932	AAGGGATGCAATTATATGCAGCAACAGGCTTCACTTTTCTTCCAACAACTGCTATACCTTTGTTAGCCCTTTTTCGTTGGGATTCAGGTGAATCAGTTTCTCAATTTTGAAGCAAGAGTTCTCGAGCTTCGAGAAGGAAGAGATACTTCGGTCATTTTGCGGAATTGACCCATCAAAGCTTGATGAATTTGGATGCATCAGTTCACGTAACCAAGCTCTTCAATCTACAGCTTCATGCTCTGTGGGAAAAACTGGAAGGGCTAATAGACTGATGGAGCTCGGAAAGATATCCAGTTGATGAAGGTAGCTCCTTTATTGGAGTAAAACTCAAATCCAGAACGTTAAAGATTTCATGTTTTTTCATCAATTGCTGGCAAGCTTTCAAGCTTACTACTACAC…
Novel_G000080	Novel_T001944	CTGGTCATAAATGAAATTTGAGAATTGTTAGTTACCAAAATTTGAAAAAGTCTATACATGTTTGAAAATGAATGGTTAAATTATTTTTAAATAAATGTAATAAAATATTTAAATTGATATAAAAGTGTACGTTATAAATTAATATTTTTCTCTGAGTAGTAATTAAGTGTGGAAGTTTGAAAATTTTAACCTATAGCTTGGAAAGACGGTTATATGTTGTCAACTACTGCTAAACTATACTAATTTGGATTTGGATCATCAATTTTCTTTCTTAATTATGTGATAATAGGCAATGAAGCAAAACAAACTCTATATATTGGATCACCATGATTATGTGATTCCATTTCTTAGAAGAATAAACACAACAAGTTCTACCAAGATTTATGCAACAAGAACAAT…
Novel_G000081	Novel_T001945	AAAGAAATGATTGGGAAGATTATTCTAGGAGATGCCCTTAAAACCACCGGCGACGCCCTTAGAACGACTGGGGACATTGCCGGGTCCATCATAAATGCTGGAGGGAATTTTATAGACCGTGCTAGCGATATCGGCCGGCTCGGTAAGAAGACGATCAAAGGGAAGGTAATTTTGATTAGAAGCAATGTCTTGAACATCACTGGGTTTCATTCTAGTATTCTTGATGGTTTCACTGAGCTGTTGGGCAGTGGAATTGTACTGCAACTCGTGAGTGCAACTGAGATTGATAGCCATTCGAACGACACACGTGGGAAAGTTGGAAGGCGAGCTTATTTGGAGAAGTGGTTGACTTCATTCCCACCAATATTTGCTGAAGAGTCGGTGTTTGAAATAAACTTT…
Novel_G000082	Novel_T001990	TTTTCATAGCTTAAATCTCAACCCATCAAATTAACACAATGACATACTAAGAGGTAACCAAAAATATTATGGCTCATTTATTTCTTAATTATCTAAATGTAGATTCACTTTTCATATCAAAATTGTTTTTGATATTATGAGTAAGAGGTAACAAAATTATACTTTTTCTCTCTGTTTTGTTCATTATCCAAATTTGTAGTATAGCCCAAGTTGATGAGGCTATACAAAACATAAAATAACATAAGAAACCCAATTACTTTTTAATTCTCTCAGTAAAACTTTCCACATGTCTCTGCACAAACCTGTCTTCAACAGTTCTATGTGAATCATCTTTCTCTCTCTCTCTCTCTCTCTAATCCATTTCCACCAGCTATGGAAGGAGGAAGAAAAAGAAGAAAG…
Novel_G000083	Novel_T002054	TCACAATAAGAGTGGGGGGGTAAGCCTTAGGAGTTTTATATAAAAAGCCAATTGCATTTCGACGCCAATTCCTCACTCCTCTCTTTCTCTCTCACACACACACACACCCAAACTCTCTCTTTTCTCCCCTTCCATTTTTCCTTTCTCCCCAAACACCTCTTATTTTCCCGGGAATCTTATTATTTTCTCGGGAAAATCACCCCTCCTTCTTTCAATGCTTCTTCTTCTTCCTTAAAACACCAAACCCACAAAAACAAAGCCCCCCTCTGCTTCCATCTCCTTAAGCTACAACTAAAACAATCAGGATGGGAAACGACACCGCTTTAACTCTCGAAGAGATCAAGAATGAAACTGTTGATTTGGAGAAAATCCCCATTGAGGAAGTGTTTGAGCAGCTGA…
Novel_G000084	Novel_T002077	AGCCACTCCATTTCCTCTCCATTGCCGCCGTGTTCTCCAAACGTCCGCCCCCAATTCCCCGCCGATGGAGAACATTCTGGATGAGTATGGCTATTACTGGGAAACCAATATGTTTCTCCAAACCGAAGATTTGGACAGTTGGGGATTAGATGAAGCATTTTATGGTTCTTATGATTCGAGCTCACCGGACGGAACGTTGTCATTGTCAGAGGCGTCGAAGAATATCTTATCGGAGAGGAATCGGAGGAAGAAGCTTAATGATAGGCTTCTTGCTCTCAGAGCCGTCGTCCCTAATATCACCAAAATGGATAAGGCGTCAATAATAAAAGATGCGATCGGGTACATCCAAGAACTCCGTGCAGAAGAAAATCAAATCGAAACAGAGATTTCAAATCTAGA…
Novel_G000085	Novel_T002173	ATTCGAGTGCCTATTTATATGTAAAAAAGTGGAAACACAATCACTTTTTATTTTTAATTAATAATAGATATATATTTTTTTTTAAATAAAGAGATCTTGTTCCTCGTCTTCGTGACAGAGCATTGCCGGAGAAGAGAGCAAGACCGAGACAGAAAGGGCGATATTTTTCACCGATTGCCCTCTCCGTCTCGATCAACCCTTAATAATCACAATACAATTAATCTTCCTTCTTTTTCCGTTGCTTAATCTTTGATTTCTTGTGATGTATTTCCTTCCATTTCTCTTTCCGTTAATCCCCTGTATTTGATGCGACGGTTGAATGCCCGTAAAAGGGACGATTCTAAAATTACCAATATGGATCCGACCAAGCTGCACCTTCGACCCAGCACCAGACCCAAT…
Novel_G000086	Novel_T002195	TTGCAATCGGGGGTGAGGAATCTTTTGGTTTCGAGTGGAAAGTTTTACTGCTTTAGGAAAATTTTATAATTTGGAAATCCGATTCCAAGGTTCGAGAATCAAGCAGCAATGGCGGAGATGAGCAAATGTTTCCATTTCCAGTATCTCTAATGCTTGAACTTCAGGGAAAGAGACTATGAAGCAGCCTCTTTGCTGCATATCTCACGAGTTTCAAAGGGTTGCACTATCTCATCCTGGAAAAATAGCTGTAATTCATGCCTCCGGTGGAGTTCAACTTTTCCGCCAGTTACACGGCGCCGGCGGAGGCGGCGAAGCTGATGATTTCTTCCAGGGGCGCGCCACATCCTCTTTTCCTCCCATGTACGAAGCCGACCGGTGCTTCACTTACTCGCAGCTGTT…
Novel_G000087	Novel_T002233	CGGCGTTCTCCTTCTCCCTCACTCTCTTCTACTAACTAAAATGCAGTGACTTCAATTTTCTCCTTTTTCAGTCGTCGTCTCCTTTACCGTCGCCCCGATTGTTCAAGCCTCTGTGGTGGTCAGTCCATGTGTGGCGTGCAAGATTCTGCATCGGAGAAAACATCTCTTGAAGAAACTCGGGTAGGATTAGAACTGGAGCTGCCAAAAGAAGAATGGGTTCCAATTAATCATCTTCTGGTATGTAATGTTCTTTTACAAATAGTTGTTGCCCAAGGTACCATGATTGGATGAATTTGATGACACTATTTTCTTGTAAACATACATAACCATATATTTTACTCATACGCAACAATATTCTTACTCATAATTGTGCATTTCTATATCTATACATTCACATAC…
Novel_G000088	Novel_T002234	TTTCACGCCCATCATCTCTCTGACTCACCCATCGCCGGCGTTCATCTCCGATCGTCTCTCCTTCTCAGAAGTCTCTGATCGTCGCTCGCGCTTGGCTCTCCCTCATCTTGCGTTGCATTGTTGTGTTGCCGTCGGCTACTATACAACTTATCTCGAGGACAAACTAATCGGATTATTTTTCTCAAGCAAGGAAGAAAATTTTCATGGCGATTTTTCTTCTCATTTTCTTATTCCTATTCACTAATTTGAGAGCCGAAGAGCGACCTTTCGATGTAAAGCGACATCTGTCCACTGTTACCAGGCTAGGCACGGTACTTGTGCTCCAACCAAAAAACGGATCAAAGAGTTGAACAACTTAAAGAATCAATTAGGGATGCTTTTAAGTGCTGCTGCAGGAAA…
Novel_G000089	Novel_T002235	GCCCATCATCTCTCTGACTCACCCATCGCCGGCGTTCATCTCCGATCGTCTCTCCTTCTCAGAAGTCTCTGATCGTCGCTCGCGCTTGGCTCTCCCTCATCTTGCGTTGCATTGTTGTGTTGCCGTCGGCTACTATACAACTTATCTCGAGGACAAACTAATCGGATTATTTTTCTCAAGCAAGGAAGAAAATTTTCATGGCGATTTTTCTTCTCATTTTCTTATTCCTATTCACTAATTTGAGAGCCGAAGAGCGACCTTTCGATGTAAAGCGACATCTGTCCACTGTTACCAGGCTAGGCACGGTACTTGTGCTCCAACCAAAAAACGGATCAAAGAGTTGAACAACTTAAAGAATCAATTAGGGATGCTTTTAAGTGCTGCTGCAGGAAATGGTTT…
Novel_G000090	Novel_T002236	TTTCATTCCACTTGGTTTAAGTGAAAATGAGAGGGTTTCACTCCTTCTCATATTGGTCTTCTTCGTTTGTCTTCGAATCTTACTGTTGTCGGATTGTGAATACTATTAGACAGTTAATATGTTACGAATTAGTTATCAGTTTTCTTCAACTTCCAGCTTGTTAAAGTAGTTTCATTTCTGTTACAACCATTGTTAGAACTCTCATGTACAGACCTGTATAAATACCCTCACTTGTTCATAAATAAAATGAGTGAAAGCTTATTCAAAACTCTGTTCAATATGGTATCAGAGCACACCCTTTCCTCCAAAATTTTCTGGTGGCCGAATTCTGTTCATACTCTGCCACTAAAACCTTCCGCTGCAAGAATGACGACTCCGACCATCAATGTGTCACACACC…
Novel_G000091	Novel_T002298	TTTCAGTCTATAGTAAGCAGTTTATCTCATTTAGAAAACAGTACGCGTAAAATAAAGGCTAAATTGAAACCAGATCAATTAACTTTATTTAGAAATACAAAGTTTGGCAACTTTTTGGATCTTAATATAGTCTTTAATGGGCCGCTCATCCACTACTTATTGTTAAGGGAGGTGGAAGATGAAATGGTTGATCATATCAGTTTCATGATAGAGATTGATCATATCAGTTTCAAGATAGGGGAAGTCGTGTGCAGTTTTGGAAGGAGAGAATTTAATATGATGACGGGTCTATGGAGTTCTCAACCAGAGCCTATTGATTTGGTTGGGAATAGTAGGTTGTTGGAGAAGTTCTTCGAACAAAAAAAGTGTATTTATATAAGTGACTTAGAGGACACATTT…
Novel_G000092	Novel_T002315	CCCACCTCCTGGTTCGTCTTCCCCATTACTCTCCCATTCGTGCCCCACTACCTCCTCGTTCGTCACCATCCATCTAAGTCATATTCATGTTCAATGAAAATATTGAGCGAAGAGGAACAAGAGCCAGTAAGTTCATCCATGGCTTCTCTATGGTGGAGATGGAGACTTTAACCTTCGTCTGTTTTTAAATTAAATTAATTTTCAAAAGGTTACAAATTTTTTTTTAAAAAAACAAAACCCATCTTTTTCCTAAATGTCTTCCCTTTCCTTCTTTCAATTTCATCCCCAAATGCCTTTCCTTTCTCCTCCCAACACCATCCCTGACTTTCTCCATCACATTTCCTCTCTTTCCAATCCCTTAGATAGGGCTTCTAGACTCCATTCTCTTATCACCAACTT…
Novel_G000093	Novel_T002316	CCCACCTCCTGGTTCGTCTTCCCCATTACTCTCCCATTCGTGCCCCACTACCTCCTCGTTCGTCACCATCCATCTAAGTCATATTCATGTTCAATGAAAATATTGAGCGAAGAGGAACAAGAGCCAGTAAGTTCATCCATGGCTTCTCTATGGTGGAGATGGAGACTTTAACCTTCGTCTGTTTTTAAATTAAATTAATTTTCAAAAGGTTACAAATTTTTTTTTAAAAAAACAAAACCCATCTTTTTCCTAAATGTCTTCCCTTTCCTTCTTTCAATTTCATCCCCAAATGCCTTTCCTTTCTCCTCCCAACACCATCCCTGACTTTCTCCATCACATTTCCTCTCTTTCCAATCCCTTAGATAGGGCTTCTAGACTCCATTCTCTTATCACCAACTT…
Novel_G000094	Novel_T002317	CCCACCTCCTGGTTCGTCTTCCCCATTACTCTCCCATTCGTGCCCCACTACCTCCTCGTTCGTCACCATCCATCTAAGTCATATTCATGTTCAATGAAAATATTGAGCGAAGAGGAACAAGAGCCAGTAAGTTCATCCATGGCTTCTCTATGGTGGAGATGGAGACTTTAACCTTCGTCTGTTTTTAAATTAAATTAATTTTCAAAAGGTTACAAATTTTTTTTTAAAAAAACAAAACCCATCTTTTTCCTAAATGTCTTCCCTTTCCTTCTTTCAATTTCATCCCCAAATGCCTTTCCTTTCTCCTCCCAACACCATCCCTGACTTTCTCCATCACATTTCCTCTCTTTCCAATCCCTTAGATAGGGCTTCTAGACTCCATTCTCTTATCACCAACTT…
Novel_G000095	Novel_T002318	TTCGTCTTCCCCATTACTCTCCCATTCGTGCCCCACTACCTCCTCGTTCGTCACCATCCATCTAAGTCATATTCATGTTCAATGAAAATATTGAGCGAAGAGGAACAAGAGCCAGTAAGTTCATCCATGGCTTCTCTATGGTGGAGATGGAGACTTTAACCTTCGTCTGTTTTTAAATTAAATTAATTTTCAAAAGGTTACAAATTTTTTTTTAAAAAAACAAAACCCATCTTTTTCCTAAATGTCTTCCCTTTCCTTCTTTCAATTTCATCCCCAAATGCCTTTCCTTTCTCCTCCCAACACCATCCCTGACTTTCTCCATCACATTTCCTCTCTTTCCAATCCCTTAGATAGGGCTTCTAGACTCCATTCTCTTATCACCAACTTGGAGGATGAAAT…
Novel_G000096	Novel_T002319	TCCCACTGATGGTGTGCAGTACTCGAGAATTGAAGAGAATGACAGGATTTATGACTTTCTTGCTGGTCTTAATCCTAAGTTTGATGTAGTTCGAGGGCGTATACTAGGTCAAAGACCGATTCCCTCCCTGATGGAAGTTTGCTCTGAAATCCGCCTCGAGGAAGATCGCACAAGTGCTATGAATATTTCCGCAACCCCTACTATTGACTCTGCTGCTTTTAGTGCAAGATCTTCTAACAGTAGCAGTGACAAGCATAATGGAAAACCAATTCCTGTCTGCGAGCATTGCAAAAAACAATGGCATACCAAAGAACAATGTTGGAAGTTACATGGTCGTCCCCCAGGAAGTAAGAAACGCCCTTCCAACGACAAACAGAACACAGGGCGGGCGTATGTGAG…
Novel_G000097	Novel_T002322	AAGACAATGTAAAATGTAAAAATGGCAGTATGCATTGAGGAGGCGTGAAATCTATACTTCAGAGTGAGAGATTGAAATTTTAAAGGAAAATAATAAAATAATAAAGAAAAAGAATCTGAGATCCCGCCGTTAAATGCCGACGGAGGAATTGTATTCAGGGAGCGACGGAGCGATGGGGTGGGGGTGGTCGATCTTTGAGGGAGTCGTGGCTGTCGGTTCACTTTCTCTTCTTGGATGGGCTGGCTTATGGTTCTTGAATCGAAGGCTTTATAAAGAGTACGAAGAAAAGCAAGTCCTTGTTCAAATAATCTTCAGCGTCGTCTTCGCTTTCTCCTGCAATCTACTTCAGCTCGTTCTCTTCGAGATCATTCCTGTTCTTTCCAAAGAGGCAAGATGGAT…
Novel_G000098	Novel_T002356	CTCTTACCCATTTTATGAAATTTAAAGAACTACGAAGAAAGCTGTTAGAAATTTTTATGAAAATTGAAATTTGATATGAGAGTGATGACAACTTAAAAACAATGTGTCATTGTCTCCAGTCTCAACTTCCATCTAAAGTCTCACTTTTTGCTTAACATTTTAACTTAGTTCTATGAGATGTTTGAGTAATATTTTAACTTTCAATTTAATATGATCCTAAAATTATATTACAAAAAAATATATATATTGATGAATATCACATTTGTTATAATTAATAGTATACTTTAATTTCCCCATCGAAAACTATATATTTCCCACTCATAGATGTAGATATCATCTTCTTAGCTTAGTTGTTTCCATTTTGTAGCTCATCGTAACAACTCCGATCGGGTTTCATTC…
Novel_G000099	Novel_T002357	CTCTTACCCATTTTATGAAATTTAAAGAACTACGAAGAAAGCTGTTAGAAATTTTTATGAAAATTGAAATTTGATATGAGAGTGATGACAACTTAAAAACAATGTGTCATTGTCTCCAGTCTCAACTTCCATCTAAAGTCTCACTTTTTGCTTAACATTTTAACTTAGTTCTATGAGATGTTTGAGTAATATTTTAACTTTCAATTTAATATGATCCTAAAATTATATTACAAAAAAATATATATATTGATGAATATCACATTTGTTATAATTAATAGTATACTTTAATTTCCCCATCGAAAACTATATATTTCCCACTCATAGATGTAGATATCATCTTCTTAGCTTAGTTGTTTCCATTTTGTAGCTCATCGTAACAACTCCGATCGGGTTTCATTC…
Novel_G000100	Novel_T002421	TGTCACTCACGCTTGATATCGTATAACCCGACCCACCTATATAATTCCCTCTCTTTCTTCCCTCACTGGCCGCTTCCAACAAATTCTTTCTTTTATCATTGTTCTTCATTTTTCAATTCAATCAAATTGCGGCCCCTTTTGCCTATGCCCCTTAAAACCCTTTTTATCAAATACGATTTCCAGTTTTAGTTTTTTTTATTGGGTTTGTTTTGTTTTTGGATTCTAATCGATTGTTATGGCGGCGAGTGCATCTTGGCATCCTCAGGAAAATGGGTTCAACGAGATCTGTGGCTTGCTGGAGCAGCAAATTTCTCCTACTTCGAATCCGGATAAGTCCCAGATTTGGCAGCAACTTCAGCAATACTCTCAGTTCCCTGACTTCAATAATTATCTTGCGTT…
Novel_G000101	Novel_T002436	TGGATATCTTTGGAGCTCATAATCTTCAAACAACGTTGATAGAGCAATATGAAAATGATGTCAAATCATGGTTTATAAATGCTTTTTTTTCTCAACTCCTTTTCTTTGCTTCAAAGAAAATATACGATCAAGTGAATAACAACACCAGAGAGGAGAAGAGATGGAGTCGGCGGTGGAGATTGATCGGTTACCGATTGATCTATTGGCTCATATTTTTGCGATGATAACATACTTCAGCGATTTGGCTCAGGCGAGGGGAGTGTGTAGAAGATGGAAAGATGGAGTTAAAATGTCAATTGGTAGAAGAAAGAGTTTGAGCTTTGCTGGTTGGAAATTGGAGGATGATTCCACTGCTCATCTTATTCGCCATGAACACAGTCTTCGAGAGCTTGATTTCTC…
Novel_G000102	Novel_T002534	CTTATATATATATATATATATATATATTTGAAAAAGAATAATAGAAAAACCTTTTAAAATATAATGGAGGTTACCGGGAGCGGCAGAGCAAGGGACCGCGGCGGAAGTTCATCAATGGAGATAGAGCGTCGTTCCCTAAGAGCAATAACGACCTCCTTCTTCGTCGAAGTTCTAACCGGACCTTGGTTCATGGTATTCGCTTCATTCCTAATCATGTCCACCGCCGGAACGCCTTACATGTTCGGCCTTTACTCCGGCGCCATAAAATCAGTCCTCGGCTACGACCAGAGCACTCTGAATCTAATTAGCTTCTTCAAAGACCTAGGCACAAACGTGGGCATAATTGCCGGACTAATCGCGGAAATCATGCCACCGTGGGTGGTTTTGGCGATCGGAGCA…
Novel_G000103	Novel_T002535	AAAAAGAATAATAGAAAAACCTTTTAAAATATAATGGAGGTTACCGGGAGCGGCAGAGCAAGGGACCGCGGCGGAAGTTCATCAATGGAGATAGAGCGTCGTTCCCTAAGAGCAATAACGACCTCCTTCTTCGTCGAAGTTCTAACCGGACCTTGGTTCATGGTATTCGCTTCATTCCTAATCATGTCCACCGCCGGAACGCCTTACATGTTCGGCCTTTACTCCGGCGCCATAAAATCAGTCCTCGGCTACGACCAGAGCACTCTGAATCTAATTAGCTTCTTCAAAGACCTAGGCACAAACGTGGGCATAATTGCCGGACTAATCGCGGAAATCATGCCACCGTGGGTGGTTTTGGCGATCGGAGCAGGGATGAATTTCGTGGGATACTTCATGATT…
Novel_G000104	Novel_T002573	CCTCACCTTCCAAATATATATTTAATATAAATAAATAATGTGTCTTGTTCACCAACTCCCTTAGCTATTACACTTCTCAAGCTATTTCCATATATATATATATATGTATCTCTCTCTTCTCACCAACTCTGATCATATATTCTTCCATAATAATTGTAATTTCAATCTCACACACACAGTTCTCAATTAATTTGGTAATTTAGTTGTTAATTCTATGGGAAGATCTCCTTGCTGTGAGAAACAACACACCAACAAAGGTGCATGGACCAAAGAAGAAGATCAACGCCTTATTAATTACATCCAAATCCATGGCGATGGTTGTTGGAGATCTCTCCCTAAAGCTGCTGGGTTGCTTCGGTGTGGTAAAAGTTGTCGACTACGATGGATCAATTATCTTCG…
Novel_G000105	Novel_T002664	CCTACACGCACTTTTAAGTATTTTTCTTATTATAAATGAGTGTTACCCTCACCCTTTCCCCCTTCACACACACACACCCCTCTCTCAATCCCTCCCGTTGCAAAAAATGTGGCCAAAATTCTTCACTATCTTCTTGATTTTACATTCATTCTTCCTCCTACATGGTGTTGCCCAAACCGGACCTCCCCGACCAAACCCAACCATCACGCGAATCCGACCAAGGCCGCCCCTTATCCCACCCGGCACCAAGCTAAAGCCTCGACAACCAATCAACAACCCGGGACCTCTAGCCAACAGAGCCAGAATCCTATACATAACGCAAGAATTAAAAAGAAACATCACTTATGACCCAAAAGGGTACACCAAAACATGGGTTGGCAACAATTATTGCCTCTTCAA…
Novel_G000106	Novel_T002729	ATTTGGAAGACACGACATATTATGCTTTCACATTTTTGCCATATGCGCTCACGTATAGACAATTCAGTCCACACGGCCACCCCGCAATAAATGCCAAATATAAGGGTACTTCGGTAAAAGTGTATACCCTTTTGCTTTCTCTATATAAATCATCCTCCCCCTTCTCGTCCCTCTCCATCGCATCCTTTTCAAACGCAGCGTGGACTTTTTGGTGAAGAACACAGATTCTTGTTAGAATATCAATGGCTGAAGAAGGGCAAGTGATTGGAATTCACAATGTTAAGGAATTCGACGAGCAAGTACGCATAGGAAAGGAAGCGAGAAAACTGATTGTGGTGGATTTTACTGCTTCTTGGCGTCCACCATGCCGCTTCATAGCTCCAATATTCGCAGAGTTGG…
Novel_G000107	Novel_T002769	AATCGATGCGCAAATAATTATTCATGTAATTTTATTTGGGTGTCAATATGAACATAGTTCAAATTGATGCTCTAATGTCAATTTTCTCAACAAGCAAAATAAAAATCAAAACTTCAAAATATAAAATTGGACCAAATCTTACAAAATTTCAGATGGGTTAGTAACCTCTTGTAGAAACGTTTAAGTTCTAAAATTTATGGGGTGAGATTAAATTTTTTTTCTTCTGGTTATAATCTATATATCTTAATTGAAGCGAGGAGGTATGTAAATAAACAAAAAAAATTGAAACATTGGGAACTTAATTTAACATTTAGTTTAATATTTAAGAACAAGCTAAAGATGCTATGAAGTTAATTGGATTTGAAAAGAATTGGAGTACAACAATGGTTGAGTACCTGA…
Novel_G000108	Novel_T002770	AATCGATGCGCAAATAATTATTCATGTAATTTTATTTGGGTGTCAATATGAACATAGTTCAAATTGATGCTCTAATGTCAATTTTCTCAACAAGCAAAATAAAAATCAAAACTTCAAAATATAAAATTGGACCAAATCTTACAAAATTTCAGATGGGTTAGTAACCTCTTGTAGAAACGTTTAAGTTCTAAAATTTATGGGGTGAGATTAAATTTTTTTTCTTCTGGTTATAATCTATATATCTTAATTGAAGCGAGGAGGTATGTAAATAAACAAAAAAAATTGAAACATTGGGAACTTAATTTAACATTTAGTTTAATATTTAAGAACAAGCTAAAGATGCTATGAAGTTAATTGGATTTGAAAAGAATTGGAGTACAACAATGGTTGAGTACCTGA…
Novel_G000109	Novel_T002771	AATCGATGCGCAAATAATTATTCATGTAATTTTATTTGGGTGTCAATATGAACATAGTTCAAATTGATGCTCTAATGTCAATTTTCTCAACAAGCAAAATAAAAATCAAAACTTCAAAATATAAAATTGGACCAAATCTTACAAAATTTCAGATGGGTTAGTAACCTCTTGTAGAAACGTTTAAGTTCTAAAATTTATGGGGTGAGATTAAATTTTTTTTCTTCTGGTTATAATCTATATATCTTAATTGAAGCGAGGAGGTATGTAAATAAACAAAAAAAATTGAAACATTGGGAACTTAATTTAACATTTAGTTTAATATTTAAGAACAAGCTAAAGATGCTATGAAGTTAATTGGATTTGAAAAGAATTGGAGTACAACAATGGTTGAGTACCTGA…
Novel_G000110	Novel_T002916	TTGAGAGCTAGTTCAGGGGATCCTACCAGAAGTGGGAGCAATAACGAAACATTAAGTACTGTTAGTATTAGAGAGAGAGAAGCTGCATCTAATCAGTATGACAAAACAAACAGTAATAGTAGTGAAGCATCACACTTCCAAAGTGGAGTTCTGCGTACAAACTGCATTGATTGTTTGGATCGAACAAATGTTGCCCAATATGCCTATGGTCTTGCAGCTTTAGGCCGCCAACTCCATGCAATGGGTTTGACAAATATGCCTAAAGTGGATCCTGATAGTAGCATTGCTGCAGCCCTTATGGATATGTATCAGAGCATGGGGGATGCTCTTGCTCAACAATATGGTGGCTCTGCTGCTCACAACACTGTGTTCCCTGAAAGGCAGGGCAAATGGAAAGCT…
Novel_G000111	Novel_T002917	TTTGCAGGTTAGACTATCAATCTTTGGAAGAGACTTCACTGTCACCTTGATTTCTAGGCGTTCTCGACACTTTGCAGGGACACGATACTTAAAAAGAGGAGTGAATGATCGGGGACACGTTGCAAATGATGTTGAAACAAAGCAGATTGTTCTTGATGAAGAAGCTGGTTCGTGCAAGGGGAAAATGAGTTCTGTTGTGCAGATGCGCGGTTCAATTCCTCTCTTTTGGTCTCAAGAAGCTTCTAAATTTAGCCCAAAGCCAGATATTATCTTACAACGATACGATCCTACATATCAAGCTACAAAATTGCATTTTGAAGACCTTGCAGAAAGATATGGCAATCCAATTATTGTTCTCAATTTGATAAAGACTTTTGAGAAAAGGCCTAGAGAAATGAT…
Novel_G000112	Novel_T002918	AAACACTAACACGAAGCATCGACGCATACACGGTAGGTATTATAGCTATAATGCATAAACGGTGATGAGAACCAATTCCTGAACCCATCCACAGCCATCATCATCGCCAACGTCGAGAAATATGGGTAAGGCAGAAGGTTCCAATCCGCCTCCGCCACCCTATGCCAAAGTCCACCCCTCAAATGACCCCGACGTTGATCACAATTCATATTCTCTCGAGAAATTCAGACTTTACGAAACCAGAGCGAGGTATTATCTGATTGGGAGCGATCGCTACAAGAAATTCTTCCGAGTGTTGAAGATCGATCGCTCGGAACCATCGGAACTCAATATCAGTGAAGACCCGGTAGTGTATTCCCTGCAAGAAATCAGGAACCTCCGTCAGCGAATTGCTGAAGG…
Novel_G000113	Novel_T002923	CTCAGTGGTCAGTGCGCTATGGCGTCGGTCGGGGAGCAAATGTATAATTATGTCTATTTTGTTTCATTGTTGTCTAAAATTTATAAATACCCAAAGGAAGAGCAATAAACAAAGAAAGGAGCAAAGTTAAAGCAATAGAAATGGCTGACAACAACAATGGTGCGTCTGCTCAAACTCCTACCATTCCTGATCTCCTCACTCCTTACAAGATGGGGAAGTTCAATCTTTCTCACAGAATCGTACTGGCTCCATTGACAAGGCAGAGATCTTACAACAATGTTCCTCAGCAACATGCCATCTTGTATTACTCTCAGAGGTCTACCAAAGGGGGTTTCTTAATAACTGAGGCCACCGGAGTTTCTGACACTGCTCAAGGGTATCCTGATACACCTGGGATAT…
Novel_G000114	Novel_T002924	TTGTGCTCGAATTATCGGCCGAACCAGAATACATGTTCATACTCTGGATAATAGTTTCCTAACTTCTGAGTTCAGCTCAGTCTTTATTTGGAGCCGTTACTTGGCAAATCATTCCCGGCAAAAAAATTAAGCCCTAATCTATACTCTCCCCCGCTTTCCTCTGGTTGAGTTTTACCCTCGAGCTTTCCCAGCATGTCTACACTCGAAATCGAAGCTAGGGATGTCATCAAGATCGTGCTTCAGTTTTGTAAAGAAAATTCACTGCACCAAACGTTCCAGACGCTACAGAACGAGTGTCAGGTTTCTTTGAATACTGTAGACAGCATTGAAACTTTTGTTGCTGATATAAACTCTGGACGGTGGGATGCTATATTGCCTCAAGTATCTCAACTTAAGCTT…
Novel_G000115	Novel_T003008	GTTTGGGATTTTTGGCGTTTCAGGGTTGGAAAGAGCGACCGGTATTTGGGAAGATTCGATACATGAACTATGCTGGGTGCAAGAGGAAATTTGATGTGGATGGCTACATTGCCTATGTGAAGAGACTAGTGGGTGAAATCAAGAAAAGAAAACCAGAGGAAACTCTGGAGGATAGAAAGCCAAAGGGAATTCGGTGCTAGTTAATGAATTTCAAGGCGTTGAGAAGCCTAACAGTAGTGACAGTTTCATGAAAGGTAATACTAATACATTTTTACTATGAGTGTGATCTCCAGCCCCTTAACTAACTAACTTACATATTGTAATTTGTAACTTGTAAGCCGTAGTTCTTTGATAAGCTACTTTGTCGTGGCTTTATTTCAC
Novel_G000116	Novel_T003024	TCTAATTCTGCGCCTCTTGTTTGTTTGTTCCCTTTTCAATTTCCTCATGGCCTTCTTTTCCGTCCTTGCCCTAGATCATGGCACACTTTGCTGCCTACCTACATTTTTCCTTCTCACACTATATTTAATTTTTCCTAACTACTATCAACATCATTTTCATTTTCCCACTTCAAAAAACTAGTTGCCAAACATTTTTGGTTTACTCATCTGAACCTCTCGACACTTCCAAGGGATGTACCTAAGAATTGTAGGCGTCATTTTGATTGGATTATCGGCATGGGCATTTTCAGCTTTTCGTCCTCCAGCTCCTAAAGTCTGTGGTTCTGTTGGGGGTCCGCCGATAACTGCACCGAGAATAAAACTTAGAGATGGGAGGCATTTGGCTTATAAGGAGCATGG…
Novel_G000117	Novel_T003080	CTTGTTGTGTAATTACATAATTTTACATTTCCTGATGTAAAAAGAATATAATTAATATTGTCATGAGACACGTTTTTCTGTCATTTCTCATACAATTCAAAGATTCGAGTACCAATATATTTGTAAACTGAACTCATCAAGTTCCCATTGAAATAGGATCCACACAAGGAAAAGCACTTGCCATTCGTTGGTTATTAGGGGCATCCCGAAAACGTCCCGGTCGAAATATGGCTTTCAAATTCAGTTCCGAATTAGTGGATGCTGCCAAAGGGAGTGGCGATGCCATACGTAAAAAGGAAGAGACTCATA
Novel_G000118	Novel_T003155	TTCCGCCTCTTATTTTGGCATCCAAAGTTTCTCCCCCTTCTTTTTTTTCCACGTAAATTACGCCTTACTTTTCCTAATATTTCAATACTAAACAATAACCTCAAAAATTCAATTCAATACTTAAGTATTTTCTTCTTTCTCTCTGACTTTCTCATTCCTTTATCCAATCCAATCCCAACGGTAAAGTTGGTTTGTCTTTACCTCACCTATTAACTTCCAATTTGGCGCAGTTGATCCCGTGAACAATTTCTCTCTGAACCAACATTAAACTAAACTTCTTTCTCTATAAATAACACCCCACTTCACCTCTATTTCATTCATCATTCCAAGTGAGTGTGTTATATTACAACTTATAACGATATTACAATGTCTTTCTCAATCACTTTGGCTCTCTACTTC…
Novel_G000119	Novel_T003217	TTCAAGGGCTTAACATGGACCAAAAACTACATCCTTCCCCTCAACAATTCAATCCTTCCAGATGGGATAATTTTGGAAGAAATTCTGGAGTTTTTACTCCCTTTGGACTAGGAGTTTGGATGTGCCCGGGACGTGATCTTGCTAGAATGGAGATCTCAATTTTCCTTCATTATTTTGTCCTCAATTACAAGATAGAGCGACTTAATCCTAAATGCAAATTGAATTACTTGCCCATTCCTCGTCCGAGAGACAAATGCTTGGCAAGAGTGATAAAAACTCCATCAAAGTGACTAAAAAGTCATCCCTCATGTAACCTTCTTTGGTCCAACAAGTGTGAACTTTGTGATCATTATTGTATCCAACCTTCTACGTATATATGACATGTACTTGTGTGTGTGA…
Novel_G000120	Novel_T003218	TACCTTCAAAATTATTTGGAACATTTTTATGGGTTCAACTCCAATAAAAAGCACTTCTATAAGAGAAATGGAGACTTTGAATGAGAATATTGCACTTGCGTTCTTCACTCTGCCACTCAACTTTCCTGGCTTACCCTTCCATAAAGCACTCATGGTAAGAACAAAAATAATTTCTAATACAAATGTGACGAAGTGTCGATAACTTTTATCATATATGTGAAATATATTTTCAATTAATCTACTCTATAATAATTTTTATATTGTATGATTGGTGAAGAAAAGCAAAGGGGAAAATTGGGAAGCAAAAGATATGATGGATTTGTTGATGGAAGTGAGAGATGAAGATGGTGAAGGATTTGATGATGAGACCATTACAGAGATCATTTTTGGTATGCTATT…
Novel_G000121	Novel_T003219	TGATTACTGAATAAGTGAAATATATTGATCAGCGAATGCATAAAGCTATTGTGGTTAAGTAGAGAAAAATCATTTTTTCAATGGAATTGATGATAAATTGGTTGTTGTTGATTGTTCCTTTCTTGGGTTTTGTTTTAGGGTTTGGGGTTTTGAAGAGATTGAATAATTTGTATTATGCACTGAAATTAGGGAAGAAATGGGATGAACTTCCTCCTGGTGATCTATCTTGGCCACTTATTGGTTCTACTCTATCCTTTCTCAAATATTTCACTTTTGGTCCACCAGAACGTTTCATTGGTGACTTCTCAAGAAGATATGGGAAACTTGATATGTACAAGACTCACATATTTGGAAAACCAACTGTAATCGTCTGCAAACCTGAAATATGTCGTCAAGTAT…
Novel_G000122	Novel_T003263	TTTTAATATTGTTAATCTAACCATTGGCAATAACCTAGGTCCATGTTGTCAATTGATTCAAGGGCTAGTAGCTGCTGAGGTTGATATTTGTTTACAGACTGCCATAAGTAATGAACTTAGAGCAAGTCTTTCAGGCCTACCCCCTGTGAACCTATCCGTTGAGTCGTTCGTGCTCCGTATATTGCTCAGCAGATGCAACAGAGCTACCTGATTTAAGTTTATCTTCTAATTAGTCTATACAACTTCAAGATGAGAAAATAAAATAAAATAAGAAGTTGTAATGCTTTATTTTATGTATGCACTTATGTTCTTTTAGTTCAATAAGTTTGGAGCGTAAGTATGAAGGTTAGGATTGAAACACCATCAACCTTGAAGTTGAAGGTACATAGATATGGATAT…
Novel_G000123	Novel_T003374	NNNNNNNNCAAGAGAAAGTGGCAGAAACCAAATTACAGTAAAGAAGTTCTTGGACGCCCACATGAAAGAAGATTTGTTTGCTGTGTTAAAATTTCCACTTTTAATGATACGCACTCTATAATCGGAGATGAGAAGTCAAGAGTAAAAGAGGCGGAGAACTCTGCAGCCTCTTTGATGATTCGTGATTTACAGAAAAGAAAGTATCTCTAATTTCTATATTATTCAATTGGGCATAATCTAGCATAACTGTATAGTAAGTTTATGCTTTCTGATGCCCTCATTTTCCTTGAATATCTTGGAGGTGGGTATGTTGTAAACCATGATTCTACTTGCATTTCTGAGTACAAGTTATTGTATCAAAATAAGTATTGGTTGCAATGTAAAATTCAAGGCAACCAG…
Novel_G000124	Novel_T003375	NNNNNNNNCAAGAGAAAGTGGCAGAAACCAAATTACAGTGTGGAGAAAGATCTAGGACCTTCACATGAAAGGATATTTGTTTGCTCGGTTAAAATTGCCACTTGTTATGGTACGTTCTATATTGTGGGAGATGAGAAATCAAGAGTAAAAGATGCAGAGAACTCGGCAGCCTCATTGATGATTCGTGCTTTACAGGAAAGAAAGCATCTCTAATGCATATATATTTATTCAATTTGGGTTGAATCTAACATAATTGTACAGTGAGTTTATGCTTCCTGATGCCCTCATTTTCCTTAGATATCATGGAGGTAGGTATGTTGTAAATCATGATTCTACTTGCCTTTCCTAGTGAAGTTATGGTATCTAAATGATTATTTTTTGCTATGTAAAGTTCAAACC…
Novel_G000125	Novel_T003390	GTAAAATCTCATCCGATTTAAACCAAGACGGACGAAAAATCTTGAATTTCATTTTAATTTCTCTGGTGGCCGGCAAAATGAAACCACAAATATACGTTATTTTTGGGCTTTGCTCATAACTCTTCACCTCCAGGGTTTAACCTTCGTTTCAGTCTCTTCAAGCACCCCAACTATCTACCCTCTGCCATGGCCGTGCTCTCTACTGCTCCATTTTCAGACCCACTTGCCTCAATCAACATATAAAACAAACAAAGCCCTCTAAACTTTGGATTATCCCAGCACCCTTTCGAAACCTTTCAAAACGGCTCCTTCTTGCACCAAGTTGGGCAGAGTTGCAGAGAAGATGACTTTGGGAATCTCCACTTCCCAAGCCTCTTCGTTTAGAACTCATTGGCCTTC…
Novel_G000126	Novel_T003536	TATTTACAAACCCCATCAATTTGAAGCTGCCATTACAGGCACTCACTTTGTTTTCCATCTTGCTACTCCTTTACGTCACACCCATGGATCTCAGTTTAGGAACACCACTGAAGCATCAGTTACAACGACGAAGATGATAACCAAATTTTGCGTGGAATCGGGAACGGTGAGGCGGTTGATCTACACAGCCTCCATCGTGTCAATGTCGCCGATGAAAGACGACGGGAGTGGTTTCAAGGAGTTCTTTGATGAAAGCTGTTGGACCCCTCTTAATCTCTCCTATCCTTTTTCTGACTCACTTATATTGGAATACGTGGAATCAAAAACGGTAACAGAAAAAGAGTTGCTTAAGTTTAGGGAGAGCGAGGAATCAGAAAGGTTGGAAGTGGTTTCATTGGC…
Novel_G000127	Novel_T003537	ACCAGTATGAGAACACGACTGAAGCATCAGTTACAGCCCCGAAGATGATAGCCAAATTTTGTGTGGAATCGGGAACGGTGAGGCGGTTGATCTACACGGCCTCCATGGTGTCGATGTCACCGATGAAAGAGGACGGGAGTGGTTTCAAGGAGTTCGTTGATGAAAGCTGTTGGACCCCTCTTAATCTTTCATATCCTTTTTCTGACTCATTTCTACAGGAATACTTGGAATCAAAGACGAGAACAGAAAAAGAGTTGCTTAAGTTTGGAGAGAGTGAGGAATCAGAAAGGTTGGAAGTGGTTTCGTTGGTGTGCGGCCTTGTCGTTGGGGAGTCTCCTCATCCTTCTTCTATTCTAAGCACCATGGTCACATTCTCTCAGTTCATTGACGAAAGTGAAC…
Novel_G000128	Novel_T003538	ACCAGTATGAGAACACGACTGAAGCATCAGTTACAGCCCCGAAGATGATAGCCAAATTTTGTGTGGAATCGGGAACGGTGAGGCGGTTGATCTACACGGCCTCCATGGTGTCGATGTCACCGATGAAAGAGGACGGGAGTGGTTTCAAGGAGTTCGTTGATGAAAGCTGTTGGACCCCTCTTAATCTTTCATATCCTTTTTCTGACTCATTTCTACAGGAATACTTGGAATCAAAGACGAGAACAGAAAAAGAGTTGCTTAAGTTTGGAGAGAGTGAGGAATCAGAAAGGTTGGAAGTGGTTTCGTTGGTGTGCGGCCTTGTCGTTGGGGAGTCTCCTCATCCTTCTTCTATTCTAAGCACCATGGTCACATTCTCTCAGTTCATTGACGAAAGTGAAC…
Novel_G000129	Novel_T003539	GAAAAATGTCAGGTTGCTACAGAGTTTGTGTTACCGGAGGGTCTGGCTATGTAGCTGCTTCCCTCGTTAAGAACCTTCTTCAAAACGGCCATATCGTCCATACAACTCTACGAAACTTGGATGATGAATCAAAGGTTGGAATTTTAAAGAGCCTCCCAAATGCAACCACCAATTTGGTGTTGTTTGAAGCTGATATTTACAAACCCCATCAATTTGAAGCTGCCATTACAGGCACTCACTTTGTTTTCCATCTCGCTACTCCTATGCACCACATTCAAGGATCTCAGGTTTCTTTCCTTTTTTCTTTTTAGTGATTTTTTTTTTTACTGTTTGTTATTATATAAAATGTTAATTTATGGTAAAAAAACCAGTATGAGAACACGACTGAAGCATCAGTTA…
Novel_G000130	Novel_T003540	GGAATAAAGAAGAAAAATGTCAGGTTGCTACAGAGTTTGTGTTACCGGAGGGTCTGGCTATGTAGCTGCTTCCCTCGTTAAGAACCTTCTTCAAAACGGCCATATCGTCCATACAACTCTACGAAACTTGGATGATGAATCAAAGGTTGGAATTTTAAAGAGCCTCCCAAATGCAACCACCAATTTGGTGTTGTTTGAAGCTGATATTTACAAACCCCATCAATTTGAAGCTGCCATTACAGGCACTCACTTTGTTTTCCATCTCGCTACTCCTTTACGTCACACCCATGGATCTCAGTTTAGGAACACCACTGAAGCATCAGTTACAACGACGAAGATGATAACCAAATTTTGCGTGGAATCGGGAACGGTGAGGCGGTTGATCTACACAGCCTCCAT…
Novel_G000131	Novel_T003541	TTGAAAAGGGAATAAAGAAGAAAAATGTCAGGTTGCTACAGAGTTTGTGTTACCGGAGGGTCTGGCTATGTAGCTGCTTCACTCGTTAAAACCCTTCTTCAAAACGGCCATATCGACCATGCAACTCTGCGAAATTTGGATGATGAATCAAAGGTTGGGATTTTAAAGAGCCTCCCAAATGCAACCACCAATTTAGTGTTGTTTGAAGCCGATATTTACAAACCCCATCAATTTGAAGCTGCCATTACAGGCACTCACTTTGTTTTCCATCTCGCTACTCCTATGCACCACATTCAAGGATCTCAGTTTAGGAACACCACTGAAGCATCAGTTACAACGACGAAGATGATAACCAAATTTTGCGTGGAATCGGGAACGGTGAGGCGGTTGATCTACACA…
Novel_G000132	Novel_T003542	TTCATTATAGTATATATAAAGAAGAAAGAGATTTTGGGAATTATGAACAAGTTTACAAAGTGAATTAAAGATCAGAGGATAAGAATTTGAAGAGAAGGGCAAAGAAAATTAACTAAAATGGCAGTGTCGTCTGATTGCTTGAGAGTGTGCGTTACAGGTGGCTCCGGCTACGTCGCATCTTCCCTCATCAAAAAGCTTCTCCTAAATGGCCACATAGTTCATGCAACTCTTCGCAACTTAGGTGATGAATCAAAAGTGGGGATTTTGAAGAGGCTCCCAAATGCAACTAATAATTTAGTGTTGTTTAAAGCCGACATTTATGAACCACATCAGTTTGAAGCTGCCATCCGAGGCTGTCATATCGTTTTTCATGTCGCTACTCCTTTACACCACACTCAT…
Novel_G000133	Novel_T003543	TTCATTATAGTATATATAAAGAAGAAAGAGATTTTGGGAATTATGAACAAGTTTACAAAGTGAATTAAAGATCAGAGGATAAGAATTTGAAGAGAAGGGCAAAGAAAATTAACTAAAATGGCAGTGTCGTCTGATTGCTTGAGAGTGTGCGTTACAGGTGGCTCCGGCTACGTCGCATCTTCCCTCATCAAAAAGCTTCTCCTAAATGGCCACATAGTTCATGCAACTCTTCGCAACTTAGGTGATGAATCAAAAGTGGGGATTTTGAAGAGGCTCCCAAATGCAACTAATAATTTAGTGTTGTTTAAAGCCGACATTTATGAACCACATCAGTTTGAAGCTGCCATCCGAGGCTGTCATATCGTTTTTCATGTCGCTACTCCTTTACACCACACTCAT…
Novel_G000134	Novel_T003544	TTGAAAAGGGAATAAAGAAGAAAAATGTCAGGTTGCTACAGAGTTTGTGTTACCGGAGGGTCTGGCTATGTAGCTGCTTCCCTCGTTAAGAACCTTCTTCAAAACGGCCATATCGTCCATACAACTCTACGAAACTTGGATGATGAATCAAAGGTTGGAATTTTAAAGAGCCTCCCAAATGCAACCACCAATTTGGTGTTGTTTGAAGCTGATATTTACAAACCCCATCAATTTGAAGCTGCCATTACAGGCACTCACTTTGTTTTCCATCTCGCTACTCCTTTACGTCACACCCATGGATCTCAGTATGGGAACACGACTGAAGCATCAGTTACANNNNNNNNNNNNNNNNNNNNNNNNNNNNNNNNNNNNNNNNNNNNNNNNNNNNNNGCGGTGAGG…
Novel_G000135	Novel_T003545	ACCAGTATGAGAACACGACTGAAGCATCAGTTACAGCCCCGAAGATGATAGCCAAATTTTGTGTGGAATCGGGAACGGTGAGGCGGTTGATCTACACGGCCTCCATGGTGTCGATGTCACCGATGAAAGAGGACGGGAGTGGTTTCAAGGAGTTCGTTGATGAAAGCTGTTGGACCCCTCTTAATCTTTCATATCCTTTTTCTGACTCATTTCTACAGGTGTATCCAAAAACAAAATATTCTATCTTACGAAAAAAAATATATCAAAATTTTAACTCTCTCAAATACATAAATATATATACACATTATACATAATATATGTATATTTGGTAATTAGACTTTTAAAATTACTTCTTCCATGAACGTTTTATTATTTTAAGTATATAATAAATTAATCAAA…
Novel_G000136	Novel_T003546	GAAAAATGTCAGGTTGCTACAGAGTTTGTGTTACCGGAGGGTCTGGCTATGTAGCTGCTTCCCTCGTTAAGAACCTTCTTCAAAACGGCCATATCGTCCATACAACTCTACGAAACTTGGATGATGAATCAAAGGTTGGAATTTTAAAGAGCCTCCCAAATGCAACCACCAATTTGGTGTTGTTTGAAGCTGATATTTACAAACCCCATCAATTTGAAGCTGCCATTACAGGCACTCACTTTGTTTTCCATCTCGCTACTCCTATGCACCACATTCAAGGATCTCAGGTTTCTTTCCTTTTTTCTTTTTAGTGATTTTTTTTTTTACTGTTTGTTATTATATAAAATGTTAATTTATGGTAAAAAAACCAGTATGAGAACACGACTGAAGCATCAGTTA…
Novel_G000137	Novel_T003659	CTAAAGCATTGTGGAGGTGGCCGTTCTCAGCGGGAAAGGCGAGAGCTGGGTTTGAGAAAATGGAGGGAAAATTCAAGTCTCTCTCATTGGTGGGAGCTGGAGCTCTCTTCGGTTCTGTTTCTACCTTCTTCATCCTCAAGCTTCTTCACAGGCAAATCGCGGATCATGCTGAATCGAAGGCAACCAAGCTGCGTGGTAATGAGAATATGGTCGAGACTACTGTAAAGGGCAGTCCTGTTGTTGGGTGCACCAATCGTGGACTTTCTGATGTAGACCTTCTAACTGACGAAATTGTTTCTGAACAACTAACAAGGAACATTCAGTTCTTTGGCCTTAGCTCGCAGAAGAATGTGACTGCATCCTATGTTGTGGTAATTGGTCTTGGTGGTGTTGGGAGTC…
Novel_G000138	Novel_T003660	GGTCAGTTCATCAAAAGGCTAAAGCATTGTGGAGGTGGCCGTTCTCAGCGGGAAAGGCGAGAGCTGGGTTTGAGAAAATGGAGGGAAAATTCAAGTCTCTCTCATTGGTGGGAGCTGGAGCTCTCTTCGGTTCTGTTTCTACCTTCTTCATCCTCAAGCTTCTTCACAGGCAAATCGCGGATCATGCTGAATCGAAGGCAACCAAGCTGCGTGGTAATGAGAATATGGTCGAGACTACTGTAAAGGGCAGTCCTGTTGTTGGGTGCACCAATCGTGGACTTTCTGATGTAGACCTTCTAACTGACGAAATTGTTTCTGAACAACTAACAAGTTCTTTGGCCTTAGCTCGCAGAAGAATGTGACTGCATCCTATGTTGTGGTAATTGGTCTTGGTGGTGT…
Novel_G000139	Novel_T003661	GAACGGTCAGTTCATCAAAAGGCTAAAGCATTGTGGAGGTGGCCGTTCTCAGCGGGAAAGGCGAGAGCTGGGTTTGAGAAAATGGAGGGAAAATTCAAGTCTCTCTCATTGGTGGGAGCTGGAGCTCTCTTCGGTTCTGTTTCTACCTTCTTCATCCTCAAGCTTCTTCACAGGCAAATCGCGGATCATGCTGAATCGAAGGCAACCAAGCTGCGTGGTAATGAGAATATGGTCGAGACTACTGTAAAGGGCAGTCCTGTTGTTGGGTGCACCAATCGTGGACTTTCTGATGTAGACCTTCTAACTGACGAAATTGTTTCTGAACAACTAACAAGGAACATTCAGTTCTTTGGCCTTAGCTCGCAGAAGAATGTGACTGCATCCTATGTTGTGGTAATT…
Novel_G000140	Novel_T003662	GAACGGTCAGTTCATCAAAAGGCTAAAGCATTGTGGAGGTGGCCGTTCTCAGCGGGAAAGGCGAGAGCTGGGTTTGAGAAAATGGAGGGAAAATTCAAGTCTCTCTCATTGGTGGGAGCTGGAGCTCTCTTCGGTTCTGTTTCTACCTTCTTCATCCTCAAGCTTCTTCACAGGCAAATCGCGGATCATGCTGAATCGAAGGCAACCAAGCTGCGTGGTAATGAGAATATGGTCGAGACTACTGTAAAGGGCAGTCCTGTTGTTGGGTGCACCAATCGTGGACTTTCTGATGTAGACCTTCTAACTGACGAAATTGTTTCTGAACAACTAACAAGGAACATTCAGTTCTTTGGCCTTAGCTCGCAGAAGAATGTGACTGCATCCTATGTTGTGGTAATT…
Novel_G000141	Novel_T003793	CGTGGAGAAGAAATGGACGGAAGAGAAAAACGTTCACCGGAGGCGGGAGAGAGTTGAAGGGGGTAACTGCAGACGCGGGAGAGTTCAAATGCTCTGGTTTACGTTTTTCTTTTGAACGGCCTTCTGTCTTCGGGTTGAAGAAAAGGAAAAAGAAGAAAAGGAAAAAGAAGAAAAGGAAAAAGAAGAAAAGGAAAAAGAAGAAAAGGAAAAAGAAGAAAAGGAAAAAGAAGAAAAGGAAAAAGAAGAAAAGGAAAAAGAAGAAAAGGAAAAAGAAGAAAAGGAAAAAGAAGAAAAGAGGAAGGAAAATAAAAGAGGGTATTTTCGTCATTTCACCTCCAATTTATCCTAAATCTCAACTTTTTTACAATCAATCCTAAAACTCTATTTCTACCCCATTTT…
Novel_G000142	Novel_T003827	GTAAAATATTGCGTTTAAGGGTCGCTTCATTTTCTAATTCTATCTTTGCACCCCCATCCCCACCGGAATTTTATTTTATTTTTTCCTTGCGCTCCCAATTTCGACGGAGCTAGGGTTTTTCTTTTCTTTTCTTTACTTTCTCCGATCATGGCTTTGAGAATCGTCTTCCTCATCCTCCTCATCGCCGCCATAGCCGTCGCTTGCTTCACGCTCCCTCTCCAAAAGATTTTGAAGGATTTCTTGTTATGGGTTCATCGGGATCTTGGAGTCTGGGGTCCAGTCGTGCTGTGAGTCAACTCTCCTCATTTCTGACATGTTTGAGAGTGATTTTGAAATTGGTTTAATCACTTTTGTGATTGACCATATTCAAAATCACTTTGAAATATGAAATCCTTCAAA…
Novel_G000143	Novel_T003828	TTTGAGAAGTAAAAGGCAAGAAGAGTGGCAATGTAAAATATTGCGTTTAAGGGTCGCTTCATTTTCTAATTCTATCTTTGCACCCCCATCCCCACCGGAATTTTATTTTATTTTTTCCTTGCGCTCCCAATTTCGACGGAGCTAGGGTTTTTCTTTTCTTTTCTTTACTTTCTCCGATCATGGCTTTGAGAATCGTCTTCCTCATCCTCCTCATCGCCGCCATAGCCGTCGCTTGCTTCACGCTCCCTCTCCAAAAGATTTTGAAGGATTTCTTGTTATGGGTTCATCGGGATCTTGGAGTCTGGGGTCCAGTCGTGCTAGCTGTTGCATACATTCCATTGACAATCATGGCTGTTCCAGCCTCAATCTTGACACTTGGGGGTGGTTACTTATTTGGGT…
Novel_G000144	Novel_T003859	AGCACTTCCATGAGGATAGATCCCCATGAATCACTCTCTTTCGTCACTCCTCTACGGATGCTCACACCCAATCCCCATGCTCGACTCCATTCCCATCCCGCCACGTATTCCAACAACACGCGTTTTCTTCTCATAGGGTAAAGAAGAAGAAATTAAAAAAATAGATTCACAAACTTCTCTTTCTCTTCGCTTCTAACATTCTTTCTTTTTCTATACAAAATCCTTCTTTTTCTCTCTGCTCAAACACCAAATTCCCAAAAAGTAAACAAATAAAATATATCATTATATTTAATAAAAATTTCAAAATAGAATAAACCCATCTTCTTCTTCTTCTCTCTCTCAGTTCAGTGACTGAAGTTGAACTGAGGGAGACCCAAAAGTTGAGGATTTTGTTGTTTT…
Novel_G000145	Novel_T003868	TTAGTTTTGAAAAGTGGAAACTTGCAAGAGGGTATTGTCGACCATTTCCCTTCAAAAACCCTAACTCCCTTTCTTTCTTCCGTTTCTTTTGATTTCTCCGTCTCCCATCTTTACCGGCGGTCGCATGACCTCTCCGGTTCGCGCCGGTCATTTTCCTTCATAGCTTCATCCTCGTTTGAGGAATTTCTAGTTTCTCTAATTCTTCTTCTCTAGAAGGAGCCAACAGGTCAGTCTTCCTTCTCCTCGTACTTCTTACACTCATGTATAACTTGTTTCGCAGAATCATTCTACCTGGATCTCCATCCTCAGTCTTTACTCACGGATTTTCCGAAAGTCCGTTGAAATCTCTCAGATTCTTATCCACCTCTTCTGAGATTGTATCATCTCCGAAATCTGCTT…
Novel_G000146	Novel_T003869	TTAGTTTTGAAAAGTGGAAACTTGCAAGAGGGTATTGTCGACCATTTCCCTTCAAAAACCCTAACTCCCTTTCTTTCTTCCGTTTCTTTTGATTTCTCCGTCTCCCATCTTTACCGGCGGTCGCATGACCTCTCCGGTTCGCGCCGGTCATTTTCCTTCATAGCTTCATCCTCGTTTGAGGAATTTCTAGTTTCTCTAATTCTTCTTCTCTAGAAGGAGCCAACAGGTCAGTCTTCCTTCTCCTCGTACTTCTTACACTCATGTATAACTTGTTTCGCAGAATCATTCTACCTGGATCTCCATCCTCAGTCTTTACTCACGGATTTTCCGAAAGTCCGTTGAAATCTCTCAGATTCTTATCCACCTCTTCTGAGATTGTATCATCTCCGAAATCTGCTT…
Novel_G000147	Novel_T003870	CTTTCGACCATTTCCCTTTATAAACCCTAACCCCCTGCCTTTCTTCTGATTTCTCCGACTCCTACTCTTACCGGCGGCCGCATGACCTCTCCGGCTCGCGCAGCCATTTTCCTTCATAGCTTCATCCTCGTTTGAGGCATTTGTAGTTTCTCTCATTCTTCTTCTCTAGAAGGAAACAACAGGTCAGTCTTGCTTCTCCTCCTACTTCTTACACTCATGTATAACTTGTTTCGCAGAATCATTCTACTTAGATCTCCATCCTCAGTCTTTTCTCACGGATTTTCCGAATGTCCGTTGAAATCTCTCAGATACTTATCCACTTCTTCTGAGATTGTATCGTCTCCGAAATCTGCTTCGTTGCCTTCTAATGTTGTTCAGCTCATGAACAATCGGAAGGCA…
Novel_G000148	Novel_T003871	GGAAACTTAAAAGAGGGTACTTTCGACCATTTCCCTTTATAAACCCTAACCCCCTGCCTTTCTTCTGATTTCTCCGACTCCTACTCTTACCGGCGGCCGCATGACCTCTCCGGCTCGCGCAGCCATTTTCCTTCATAGCTTCATCCTCGTTTGAGGCATTTGTAGTTTCTCTCATTCTTCTTCTCTAGAAGGAAACAACAGACGCCGATGCACCGCTGATCGCCGATGCTTCGCTGCCGTTCGTTTTTCTTCTCTGTTCTCTCACAGCTTCATCCTCTTGTGACGCATTTGTAGTTTCTCCCATTCCCATTCTTCTTCTCAAGAAAGAACCAACAGGTCTGTCTTCCTTCTCCTCGCAGTTTTTACAGACATGTCTAACTTGTTTCGCAGAATCCTTCT…
Novel_G000149	Novel_T003872	CCCTAACCCCTTTTCCGTCCCATATGTTTTTCAACTAGTTTTCAAAATAAAAAGAAAGAAAAGGAAAAACCTAATTTCGACGATTTCCTTTCAAAAGCCCTAACCCCCTTCGTTCATTCCTTGTCTTATTTTCTTTGTTCTCTTTGTCTCCCACTCCGCCGATGTCCGATGCTCCGCCGCCCCCCATTTCCCTTATCTGTTCTCCCATAGCTTCATTCTCTTGTGAGGCATTTGTGGTTTCTCCCATTCTTCTTCTCAACAAGGAACCAACAGGTCTGGTTTCCTTCTCCTCCCAGTTCTTTCAGTAATGTCTAACTTGTTTTGCAGAATCCTTCTACTTAGATCTCCATCCTCTGTATTTTCTCACGGATTTTCCGAAAGTCCGTTTAAATCTCTCAG…
Novel_G000150	Novel_T003873	GTTTGTAGTTCATTGATTAATCTTTTGTTGGGGAGAATATTGAGATTTGTTGAAAAAACCAAAAATCCTAATTTTCTTAGGTAAATTTTGTGATTAATGTCAGTGCTATATCTACGAACAAAAATTATTTAACCCTAGATTTTAAAAAGGGGTTAATTTTGAAAATTAAAATCTTAGAAGAGGCTATTTTCGTCCATTTCCCTTCAAAAGCCCCAACCCCTTCTTTCTTTCCTTTTCCTAATCTCTTTGTTCTCTCGTACTATCCCACTCCGCCGATCGGTGATGCTCCGCCGGCCCCCATTTTTCTTCTCTCTTCTCTCTTCTCTCACAGCTTCATCCTCTTGTGAGGCATTTGTAGTTTCTCCCATTCTTCTTCTCAACAAGGAACCAACAGGTCTG…
Novel_G000151	Novel_T003874	TTTTCCTCTCTCCTATTTTCGCCGCCAGCCTCAGTGACCTCACCGGCCCCCATACTTTCTTCGTTCTGTTGTTGTTTCCCATTCCTCGGTTCCCTTACCATAAAGCCATTTTCGACTATTTCCCTCCCCCGCCGCCCATTTTTATTCCTTTTCTCTCATAGCTTCATCCTCTCGTGAGGCATCTGTAGTTTCTCCCATTCTTCTTCTCAACAAGGTACCAACACCTCACTCTTCCTTCTCCTCCCACTTCTTACACTCATGTCTATCTTCTTTCGCACACTCCTTCTCCTTAGATCTCCATCCTCAGTCTTTTCTCACGGATTTTCCGAAAGTCCGTTGAAATCTCTCACATACTTATCCACTTCTTCTGAGATTGTATCATCTCCGGAATCTGCTTCG…
Novel_G000152	Novel_T003875	TTTTCCTCTCTCCTATTTTCGCCGCCAGCCTCAGTGACCTCACCGGCCCCCATACTTTCTTCGTTCTGTTGTTGTTTCCCATTCCTCGGTTCCCTTACCATAAAGCCATTTTCGACTATTTCCCTCCCCCGCCGCCCATTTTTATTCCTTTTCTCTCATAGCTTCATCCTCTCGTGAGGCATCTGTAGTTTCTCCCATTCTTCTTCTCAACAAGGTACCAACACCTCACTCTTCCTTCTCCTCCCACTTCTTACACTCATGTCTATCTTCTTTCGCACACTCCTTCTCCTTAGATCTCCATCCTCAGTCTTTTCTCACGGATTTTCCGAAAGTCCGTTGAAATCTCTCACATACTTATCCACTTCTTCTGAGATTGTATCATCTCCGGAATCTGCTTCG…
Novel_G000153	Novel_T003881	CTTTGCTCTCTCCTACTCTCCCCCTCCGCTCATCGCCGATGCTCCCCCGCCCCCCATTTTTCTTTTCTCTTCTTTCATTGCTTCATCCTCTTGTGAGGCATTTCTAGTTTCTCCCATTCTTCTTCTCAACAAGAAACCAACAGGTCAGTCTTCCTTCTCCTCCCACTTCTTACACTCATGTCTAACGTGTTTCGCACAATCCTTCTACTTAGATCTCCATCCTCAGCTTTTTCTCACGGATTTTCCGACAGTCCATTGAAATCTCTCAGATACTTATGCACCTCTTCTGAGATTGTATCATCTCCGAAATCTGCTTCATTGCCTTCTAATCCTGTTCAGCTCAATAATAATTCGAAGGCTGTGATTGGGTTACTTGCGAATCATGGATTCTCTGAATCA…
Novel_G000154	Novel_T003882	CCTAACCCCTCTTTCTTTCCTTTTCTTATTTTCTTTGCTCTCTCCTACTCTCCCCCTCCGCTCATCGCCGATGCTCCCCCGCCCCCCATTTTTCTTTTCTCTTCTTTCATTGCTTCATCCTCTTGTGAGGCATTTCTAGTTTCTCCCATTCTTCTTCTCAACAAGAAACCAACAGGTCAGTCTTCCTTCTCCTCCCACTTCTTACACTCATGTCTAACGTGTTTCGCACAATCCTTCTACTTAGATCTCCATCCTCAGCTTTTTCTCACGGATTTTCCGACAGTCCATTGAAATCTCTCAGATACTTATGCACCTCTTCTGAGATTGTATCATCTCCGAAATCTGCTTCATTGCCTTCTAATCCTGTTCAGCTCAATAATAATTCGAAGGCTGTGATTG…
Novel_G000155	Novel_T003883	AAAACCCTAACCCTCTCTCTGTCTCCCACTCCGCCCATCGCCGATGCCCCGCCGCCCCCCATTTTTCTATTCTGTTCTCTCATAGCTTCATCCTCTTGTGAGGCATTGCTAGTTTCTCCCATTCTTCTTCTCAACAAGGAACCAACAGGTCTGTCTTCCTTCTCCTCCCACTTCTTACACTCATGTCTAACTTCTTTCGCACAATCCTTCTACTTAGATCTCCATCCTCACTCTTTTCTCACGGATTTTCCCAAAGTCCGTTCAAATCTCTCAGATACTTATCCACCTCTTCTGAGATTGTATCATCTCCCAAATCTGCTTCGTTGCCTTCTAATGCTGTTCAGCTCAATAATAATTCGAAGGCTGTAATTGGGTTACTTGCGAATCATGGATTCTCTG…
Novel_G000156	Novel_T003884	AAAAACCCTAACCCTCTCTCTGTCTCCCACTCCGCCCATCGCCGATGCCCCGCCGCCCCCCATTTTTCTATTCTGTTCTCTCATAGCTTCATCCTCTTGTGAGGCATTGCTAGTTTCTCCCATTCTTCTTCTCAACAAGGAACCAACAGGTCTGTCTTCCTTCTCCTCCCACTTCTTACACTCATGTCTAACTTCTTTCGCACAATCCTTCTACTTAGATCTCCATCCTCACTCTTTTCTCACGGATTTTCCCAAAGTCCGTTCAAATCTCTCAGATACTTATCCACCTCTTCTGAGATTGTATCATCTCCCAAATCTGCTTCGTTGCCTTCTAATGCTGTTCAGCTCAATAATAATTCGAAGGCTGTAATTGGGTTACTTGCGAATCATGGATTCTCT…
Novel_G000157	Novel_T003885	CTTTGCTAGTTTTAGCTTCACCTTTATTAATTAGTTTTCAGAAAGTTATTTTCGACCATTTCCCTTCAAAAACCCTAACCCTCTCTCTGTCTCCCACTCCGCCCATCGCCGATGCCCCGCCGCCCCCCATTTTTCTATTCTGTTCTCTCATAGCTTCATCCTCTTGTGAGGCATTGCTAGTTTCTCCCATTCTTCTTCTCAACAAGGAACCAACAGGTCTGTCTTCCTTCTCCTCCCACTTCTTACACTCATGTCTAACTTCTTTCGCACAATCCTTCTACTTAGATCTCCATCCTCACTCTTTTCTCACGGATTTTCCCAAAGTCCGTTCAAATCTCTCAGATACTTATCCACCTCTTCTGAGATTGTATCATCTCCCAAATCTGCTTCGTTGCCTTC…
Novel_G000158	Novel_T003947	TCTATTTCAATGATCAATAAAAGCAAAACTTGTCATCAACTAGAGATGAATTTGTCCTTTTAAACTATATTGGTTTGTGATCTATCTTGCTTGCAAACAACCCTCAGTTGAGGGAATATAATAAACAGATTATGAATTTCCTAAATTAGATACATAACTAAGAAAAGATATATATGGAAGACTTTTGGTGATCATTTGCTACAAGCTGTCATGACACTTATTTATTTATTTATTTTGTTATCTCTTTCTTCCCCTTAATTTGAGTTGTGTGTGTGTCATGTGAGAGTAGAAACTTCTCTATAAATGAGGTCCAAGAAGAGATGTTCTTGGCAGTGCCTTATCTCCCCCTAATCTTTCCTAAAATATCACTTTATACTCCAAATTATACCCCCAAAAATT…
Novel_G000159	Novel_T003952	CGAGAAGTAGGCTTTGTGCGGCAATGAGTGGGAGCAACGTAAACAAGGTCTTTTACGCCGATAACTACCATCCCATTCAGGCCGGCAGCATCGACGGCACCGACATTCTTTCCCACGACAACGCCGTCTACCGAGCTTTACTCTGTTCTTCTGCTGGCCTCTATGACCCCCATGGCGATCCCAAGGTCTTCGGTGACCCTTATTGCACCCTCTTCGTTGGTCGCCTTTCACATCTCACTACTGAAGACACTCTTCGCAGGTAACTGGTTCTTCACGTGGTTATGCTTTTGTTGAATATGAAACTGAAAAAGAGATGCAACGTGCATATAAGGATGCTCATCATTCAATGATAGATGATTGTGAAATTATAGTTGATTACAATCGACAACGGCTTATGTC…
Novel_G000160	Novel_T003953	GGGTGATGAGCAACTTTCATTTATGGAGGGAGACGAGAAGTAGGCTTTGTGCGGCAATGAGTGGGAGCAACGTAAACAAGGTCTTTTACGCCGATAACTACCATCCCATTCAGGCCGGCAGCATCGACGGCACCGACATTCTTTCCCACGACAACGCCGTCTACCGAGCTTTACTCTGTTCTTCTGCTGGCCTCTATGACCCCCATGGCGATCCCAAGGTCTTCGGTGACCCTTATTGCACCCTCTTCGTTGGTCGCCTTTCACATCTCACTACTGAAGACACTCTTCGCAGGGCAATGAGCAAGTATGGACAGGTTAAAAATCTACGCTTAGTCAGACACATTGTAACTGGTTCTTCACGTGGTTATGCTTTTGTTGAATATGAAACTGAAAAAGAGA…
Novel_G000161	Novel_T004082	CGTCTCTTCTCCTCATCTTTTTCTTCCTCTTCACCACCATCTCTTCTTGTTCAGGGATGTATTTCTTCCTATATTCTTTTACCGAATGAGACTTTGCAGAGTTTGTTTGTTTTTTAATTTGTATCAATTTTTTACGTTAGTGATTTGATGTACTTTTATTATATATATTAGTTGACTAATACAGTTACGTGTTTTTTATTCTCTCAAAATGAATGCAGTTCATTGTAGTTATGGTTAAGCTTGCAATCAATGTATTTCATAGTGGTCAATGGGATGAGCAGCAGTGCTACGTGGATTACAAAACAAATTGTGTTTTGGTTGATGGAGTGACATCATCATTTGATTTTTTTGTGAACTTGATACATACTGAAATTCAGATTGAGTCATCTATTGAACTTT…
Novel_G000162	Novel_T004083	GTTTTCTTCGTCCTTCAATCTCCACCGTTCTTGGTTTCTCCTATTTGCTACGTCTCTTCTCCTCATCTTTTTCTTCCTCTTCACCACCATCTCTTCTTGTTCAGGGATGTATTTCTTCCTATATTCTTTTACCGAATGAGACTTTGCAGAGTTTGTTTGTTTTTTAATTTGTATCAATTTTTTACGTTAGTGATTTGATGTACTTTTATTATATATATTAGTTGACTAATACAGTTACGTGTTTTTTATTCTCTCAAAATGAATGCAGTTCATTGTAGTTATGGTTAAGCTTGCAATCAATGTATTTCATAGTGGTCAATGGGATGAGCAGCAGTGCTACGTGGATTACAAAACAAATTGTGTTTTGGTTGATGGAGTGACATCATCATTTGATTTTTT…
Novel_G000163	Novel_T004084	TTTTTGTCGTTCTTCCTCTTTGTAGTTTTCTTCGTCCTTCAATCTCCACCGTTCTTGGTTTCTCCTATTTGCTACGTCTCTTCTCCTCATCTTTTTCTTCCTCTTCACCACCATCTCTTCTTGTTCAGGGATGTATTTCTTCCTATATTCTTTTACCGAATGAGACTTTGCAGAGTTTGTTTGTTTTTTAATTTGTATCAATTTTTTACGTTAGTGATTTGATGTACTTTTATTATATATATTAGTTGACTAATACAGTTACGTGTTTTTTATTCTCTCAAAATGAATGCAGTTCATTGTAGTTATGGTTAAGCTTGCAATCAATGTATTTCATAGTGGTCAATGGGATGAGCAGCAGTGCTACGTGGATTACAAAACAAATTGTGTTTTGGTTGATGG…
Novel_G000164	Novel_T004126	CCATGGCTCTCCTTTGGTATTTTGCTTCCATCCATCTCATCCTTCTGCTTTCTATGCCTAAAAATAATGTAGCCCAACACATCAAAATGAGGTGTATCCAAAAGGAAAGAGTAGCACTTTTATCCTTCAAGCAAACACTAGTTGATGAATTTGATATACTCTCTTCTTGGGACACACATATCAACTGTGATTGTTGCAATTGGAGAGGTGTTGAATGCACCAACACTAATTCTACCACTCACCAACATATCATTACACTTGATCTTCATGGCTCATATTCTTATGAAAGGTATTTGATGGGTGAGGTTAGTTCTTCTTTGACTCAATTGTCATACCTCAACTTCTTAGATCTTAGCTTTAATCAGTTTGATCGGATTGTCCTTAAAGATATTGCTTCTC…
Novel_G000165	Novel_T004175	GTTTAACCAACTCAAAAGCGAGAGGAGACGAGAAAAAAAGATGCTTCTTTTGAAACTTGATCTTCTTCTACAACCCCGTCGATTCCTCTCCCTGTCTCTAGAACTACTGCGACAGCATCCTTAACGATTCTCTCACAGGTCTTTGGCGTTTTTGTTGTTAAGATCCTCTAATGGTTGTTGTTCAGGCTACCAAGCTCAGCCTTCCCAACCCTTCTCTCTCTTCCCCACAAATTTCTTCCCTTCTCTTTGAACCTCATTCTCTTTCTCTTGCTCTAATGCACTCAGATTCTTCTTTCTCCCTCTACCCTTCTTTTTCCCCTCTCTCACTTTCCTCTCTTCCTTCCCCTCAAGTGGTTGTGCCTTCTCCGTGTTCTTCTGCGGCTTTTGTTGCCCTTCAGA…
Novel_G000166	Novel_T004191	GTTATTTCTAGATCATAAGATAATTTATTTGAAATATGAAAGAAAAAGAAAAGATAAAGAGATTCAAGACTCAAAAGAAGAAAAAGAAAACTGAGATTGGAAAGACCTAAACTTGTAATTGAACCCTGAAGAAAAAGTAAAAATTTGCAAAAGCAAGTCCAAAAGTTTCAATTATTTAATTTTGCGTCCCCCACTCCCCGAAAAAGAAAGAAAAAAAAAGTATTATTATTATTATTATAGCCTTGCAGTAGTTCCTAATCTCTTCCGCTCGTGGCCTCCCTCTGTTCATCAATTTCATTGAAGCTGCCGCCCATTCTCATCTCTTCCAACTTTCACATTCAAAAATCGATCCGTAATTTCAAAATTTTCCATTTCCACCACCATGATCCATCTCTAACA…
Novel_G000167	Novel_T004192	TGGAAAATGAAAGTAACTTGAAATTGAAATCATTGCGTTCGGATCGTGGAGGAGAATATATTGTTTTTGCAGATTTCTTGAAGGAAAATGGAATCAAGCATCAGAAGACTGTTCGAAGAACTCCTCAACAAAACGGAGTTGCAGAGAGGAAAAATAGAATAATAATGGAACTTGCAAGAAGTATGTTGAAGGCAAAGAAGCTTCCTGATCAATTTTGGGGAGATGCAGTAACTTGTGCTGTTTATCTCCTAAATAGAGCTTCAACGAAAAGTGTGCAAGGTATTACTCCTCAAGAAGCATGGAGCGGATTGAAACCAACCGTTAGTCACCTAAGAGTGTTTGGGTGCATTGCTTACTCTCACATTTCAGATGAGAAAAGAGGTAAGCTAGATGATAAAT…
Novel_G000168	Novel_T004206	AAAAATCCCAATTTCCAAATTTCCCAATTTCGCATCGTCTTCTTCTTCTTCGTAATTTCTCAATTTCGAATCATCTTCTTCTTCTTCACGGCTAAGTATTCAAAATCTTCATCTTCTTCTTCACGCTTGAGCTTCCGAAATCTTCTTCTCCACGTCGTCGTTCGCCACGCTGCCGTCTCTTCACGCTTCTCCGTCTTTGAAAAGTAACCATCGATCCTTCACTCCTTTCGTCTTCGCCGTTCTTGACATTGGGGAAGCCCTATCCCTCTCTCGTTTTTGAAGACATTCAAAATTTGTTTTCACACTCGTTCGAAATCACCATTCAAAATCACCACCGGGGATTAATTTCATCTCTTCACGCCTATCTCTTCGCACTCGATCTATTCATTCTGAAAAATC…
Novel_G000169	Novel_T004207	TTTGCCCTAAAAATCCCAATTTCCAAATTTCCCAATTTCGCATCGTCTTCTTCTTCTTCGTAATTTCTCAATTTCGAATCATCTTCTTCTTCTTCACGGCTAAGTATTCAAAATCTTCATCTTCTTCTTCACGCTTGAGCTTCCGAAATCTTCTTCTCCACGTCGTCGTTCGCCACGCTGCCGTCTCTTCACGCTTCTCCGTCTTTGAAAAGTAACCATCGATCCTTCACTCCTTTCGTCTTCGCCGTTCTTGACATTGGGGAAGCCCTATCCCTCTCTCGTTTTTGAAGACATTCAAAATTTGTTTTCACACTCGTTCGAAATCACCATTCAAAATCACCACCGGGGATTAATTTCATCTCTTCACGCCTATCTCTTCGCACTCGATCTATTCATTCT…
Novel_G000170	Novel_T004208	GCCGAGGTAGAGGAGCAGGAGGCCGAGGTAGAGGAGCAGGAGGCCGAGGTAGAGGAGCAGGTCGTAATCAGCCTACTGAGGGTCAAGCTGAACAGCGAATTCCTGCTGCACCCGTGACTCACGTCGAGTTTGATGCACTGTCTGCTCACATGGAGCAGAGGTTTACAGAACTTATGACAGCCATAGCTCAAAACCAGCAGGCACCTGCGGTTCCACCTGCACCTGTAGTTCCCCCTGCACCAGCAGCCCCTCCTGCACAAGAATTACCTAACCAACTTTCTGCTGAGGCGAAACATTTGAGGGACTTTCGGAAGTATGACCCTCAGACGTTTGATGGGTCACTGGAGGATCCTACTAAAGCTGAAATGTGGTTGTCCTCTGTGGAAACCATATTTAATT…
Novel_G000171	Novel_T004242	CTTTCATAGCCATACAAAAGAGCAGTCAAATATCACAAGATTCAATGATTCATGTCCATTCCTATAGTAAAAGAATACTCCCACCGTCCTGGATAATATCACAATAAGATTTACATAATAAATCGTACCAATCATTCACAACATTGTCCATTTTCTACGTACTGTTCAACACATGTCTTAAACTAAACTTAACAAAATCTCTCCCCCTCAAACAAGAATTTCATAAATTCAAGTTCATGAAAACTCACCTTTCTATAACTCATTTCTCTTACAGAATACAAACACATACACCAAACACAACAAGATCTATACTTATTAAACTACAAACAACAGTTCTTAACAGGTTATTTATTGTTGTTGTTACCTTCACAAGAACTCGGAAGGTGAATTGGCATCAGG…
Novel_G000172	Novel_T004243	CCGAGGGCAGGACAGTGGAACCAAAGAAAAAAGAAGAGTATGCAGGAAAAATCCAAGATGGAACAGACAAAGGCTACATGAGGAGGACAGATTTCCCCATAAAACAAGTAACTATACCTATTAAGGGTAGTTATCAAAAAAGTGAACCTCCTATCAAACGACTTTCAGACGCAGAATTCAGGTCCAGATTGGATAAGGGCCTATGTTTTAAATGCAATGAGAAATATACACCAGGGCACAGATGTAGAGTGAAGGAAAAAAGGGAGCTGATGTTATTTATCATGAATGAAGAGGAGAGCAAGGAAGAGGAAGGCAAGATGGAAGAGGAACCAGGGGAAACAGTGGAATTAAACCATCTGGATTTTGCTGAAGGGGAGGAAATAGAATTGAAGACAATCC…
Novel_G000173	Novel_T004259	CCTTTACTCTTAGTCTGTAACAATGGCGGACGCTTCAAACAAGATTTCTTCTCGTTCATCAACTTTACCCTTCAAATCGAAGAAAAATTTGGGCTCCAACTCCTCATCATTGCTCAAGGATCCGCAATCTTTAAGCTCCAGGACGCCGGAGAAGCCGGTGGAGCGAAATAGGAAACGGAAGGTTGCGCTTTCCATTAAAGAGGTTAAACAAGCTGCTCAGAGCGTCCATGAATCTAATCGTCAGTTGCATCATGATCTGACCACTAGAGGGAGTAAATTAGTTAGAAGACAGATGGATTCGTGGTCGAATGAAAGTCAATCTAGTAGATCCAAGACTTGTGTTGATAATAAGTCCAATAAATTGCCTGAAAAATTTGAGCTGCTGTGTAAGTTCTTTGA…
Novel_G000174	Novel_T004260	CCTTTACTCTTAGTCTGTAACAATGGCGGACGCTTCAAACAAGATTTCTTCTCGTTCATCAACTTTACCCTTCAAATCGAAGAAAAATTTGGGCTCCAACTCCTCATCATTGCTCAAGGATCCGCAATCTTTAAGCTCCAGGACGCCGGAGAAGCCGGTGGAGCGAAATAGGAAACGGAAGGTTGCGCTTTCCATTAAAGAGGTTAAACAAGCTGCTCAGAGCGTCCATGAATCTAATCGTCAGTTGCATCATGATCTGACCACTAGAGGGAGTAAATTAGTTAGAAGACAGATGGATTCGTGGTCGAATGAAAGTCAATCTAGTAGATCCAAGACTTGTGTTGATAATAAGTCCAATAAATTGCCTGAAAAATTTGAGCTGCTGTGTAAGTTCTTTGA…
Novel_G000175	Novel_T004261	CCTTTACTCTTAGTCTGTAACAATGGCGGACGCTTCAAACAAGATTTCTTCTCGTTCATCAACTTTACCCTTCAAATCGAAGAAAAATTTGGGCTCCAACTCCTCATCATTGCTCAAGGATCCGCAATCTTTAAGCTCCAGGACGCCGGAGAAGCCGGTGGAGCGAAATAGGAAACGGAAGGTTGCGCTTTCCATTAAAGAGGTTAAACAAGCTGCTCAGAGCGTCCATGAATCTAATCGTCAGTTGCATCATGATCTGACCACTAGAGGGAGTAAATTAGTTAGAAGACAGATGGATTCGTGGTCGAATGAAAGTCAATCTAGTAGATCCAAGACTTGTGTTGATAATAAGTCCAATAAATTGCCTGAAAAATTTGAGCTGCTGTGTAAGTTCTTTGA…
Novel_G000176	Novel_T004262	CTTTACTCTTAGTCTGTAACAATGGCGGACGCTTCAAACAAGATTTCTTCTCGTTCATCAACTTTACCCTTCAAATCGAAGAAAAATTTGGGCTCCAACTCCTCATCATTGCTCAAGGATCCGCAATCTTTAAGCTCCAGGACGCCGGAGAAGCCGGTGGAGCGAAATAGGAAACGGAAGGTTGCGCTTTCCATTAAAGAGGTTAAACAAGCTGCTCAGAGCGTCCATGAATCTAATCGTCAGTTGCATCATGATCTGACCACTAGAGGGAGTAAATTAGTTAGAAGACAGATGGATTCGTGGTCAACTGAAAGTCAATCTAGTAGATCCAAGACTTGTGTTGATAATAAGTCCAATAAATTGCCTGAAAAATTTGAGCTGCTGTGTAAGTTCTTTGAT…
Novel_G000177	Novel_T004281	CCCTAGACCTAGAAGGTCCCTTTGGACTATTTCCCCCATAATTAGAGTGTTCTAAAATTAAACACAAAATAAAGGTGTGTCACGTTTCCCGAAGTTTCTAGAGTCCCCACCGAAGTTCTCCAAATCGTGGCTTGCAGACCAAGTACTGCCATTCAAATTCGTTTCTTCCTCTAAACCTCCTCCCTTAATTTTGGCATTTTGGCTCCTATAAATTCACCCCCTCCTTATCCCTAATCCTTTGTCTTCCAGATTTTCCTTTAAAGCTCGTTTTTCCCATTTCGTCGCCTTCTCTCTTCATCTCAAGATGCAAATATTCGTAAAAACTCTCACTGGCAAAACAATCACCCTCGAGGTGGAAAGCTCTGATACAATTGACAATGTAAAGGCAAAAATTCAAGA…
Novel_G000178	Novel_T004317	AAAGCATCATCGAAATTCATTTCCGACTGGAGGTTCTTGGAGAGCATCAAAACCACTCGAGCTTGTTCATACAGACTTATGTGGACCTATGAGAACTACTACACATGGAGGTAACCGTTATTTTCTCACATTTATTGATGACTACAGTCGAAAAACATGGATTTATCTACTAAAAGAAAAGAGTGCTACTTTCGAATGTTTCAAGACATTCAAAGCAATGGTGGAAAATGAAAGTAACTTGAAATTGAAATCATTGCGTTCGGATCGTGGAGGAGAATATATTGTTTTTGCAGATTTCTTGAAGGAAAATGGAATCAAGCATCAGAAGACTGTTCGAAGAACTCCTCAACAAAACGGAGTTGCAGAGAGGAAAAATAGAATAATAATGGAACTTGCAAG…
Novel_G000179	Novel_T004332	CTTATTTTCTGCATCTTAAATACCTTATTTTTTTGCATCTTAATTGGTACTGAAATTTTGTTTGTTTCAGTGGAAGAGGCACTATCAGCATTGACATGTACATGTGATTTTAAGCAAGAACCAGGAGAGTGAGAGTTTTAGTGTGCCGTATTTAGAATTTGCCGATATCTTTTTCCCGTTTCAGCAAGTATTCCTGATAGTGGGGATTCTTCCAGTAATGCTAGATATTGGTACTAACAACGAGAAGTTACTTAATGATCCTCTTTGTA
Novel_G000180	Novel_T004340	GTTTCACCGACTCTGTCAAATCCGTACGAACCGATGACCTACAAATTCCCAATCCTTTCTTCCTCTTTCAGTTCTTTACCTTCTTCTTCAACCATCTTCACACACACAACTTTTTTATAAACTCAAACAAACCCTATTTCCCTCTCTCTCTTTCTCTAACACTTTTCAAATCTTCAAAGAAAGAAAATTCCAATTTTGATCAACGAACCGGCCCGCAAGCAGAGGCAGAGCATATCCGGCCCCCATGGAGGACTACAACAACAACAATGATGATGATCAACAACAGATTATAAAGATAGAAGATACTAGCACTATCACTGATGGCGGCGGCGGAGGCGACGGTGGTGGTCGTGGTGGTGGTGATGGTGGGGTTTTCTCATTTTCCGATAACATAATACC…
Novel_G000181	Novel_T004344	CAATTGGTTGGGAATAGTAGGTTGTTGGAGAAGTTCTTCGAACAAAAAAAGTGTATTTATATAAGTGACTTAGAGGACACATTTGTGGAATACGAGGGGGATGACGATGACGATGACATAGTTAAATTAGCTCTAGTTTACTTTATAGAGATGTCATTGTTAGGAAAAGATAGGCGGACGAAAGTGGACCGAACTTTATTTAGGATTGCAGATGATTGGACCACATTTAACAATTACGATTGGGGAGGGTTGGTTTTTGGACGTACACTTTCTGCCTTAAAACGAGCCTTGGACATGCAACATGCCAAGGGAAAGAATAAATCAACTAAGACAAAATATACTGTCATGGGATTTCCGCAGGCGTTACAAGTTTGGGCATATGAGTCTATACCAACCATC…
Novel_G000182	Novel_T004373	TTTCAACTAAACGATTACTCAACGATACTAGCAACAATCTCTTCTATTAATATACTTTTTTTGTTTGTGCCTATAGTGGAATGGTGGGATAATTTTGGACAATCAACTCCAAACTTGCAAAAGTTTGCTGTGAGAATTTTAGGTCTTACTTGTAGTGCTTCTGGATGCGAGCGTAATTGGAGTGCGTTTGAAGAGCTTCATAGCAAGAAACGAAATAGGCTTGCTCAAAGTCGTTTGAATGATCTAGTGTTCATCAAATACAACACAGCATTAAAACGTCGATACAACCTACGAGATATTGTCGACCCCATCTCCTTGAAAGATATTGATGATAGTAATGAATGGTTGATTGGAAGATTGGATGACGATTCTGAGGAGGATGATGAGTTGGTATTTGAC…
Novel_G000183	Novel_T004403	CTACTTCTTCAGTTCTTCGTCTTCGTCTTCCGTTTGCTTCCTTTTCCACCCTTCCGTTCCGGCCACCCTTCTTCTTCACACAAAACGAGTGCTGCGGCTGCCATTACTCTGTTTTTTTGTGCAAAAACAGAGGAAAAGAGAAGACAATAATATTCTGTGCTACAGTGCTGCTAGTGCTTCAGTTTTCGCCTCCTCCATCTCAGCTTTATCACGGTGGAATGGTGGGATAATTTTGGACAATCAACTCCAAACTTGCAAAAGTTTGCTGTGAGAATTTTAGGTCTTACTTGTAGCGCTTCTGGATGCGAGCGTAATTGGAGTGTGTTTGAACAACTTCATAGCAAGAAACGAAATAGGCTTGCTCAAAGTCGTTTGAATGATCTAGTGTTCATCAAATAC…
Novel_G000184	Novel_T004404	GGAGGATGATGAAATAGTTAATGGACTCTACTCATGCATAACAAAAATGGTTGCTTCATTGGAAGTACAAGACAAAATACTTGCAGAACTAAGCAAGTATAAGAGAGCTGAAGCATTATTCGGACAACCTTTAGCAATCAGACAAAGGGACAAAATATCTCCAGTGGAATGGTGGGATAATTTTGGACAATCAACTCCAAACTTGCAAAAGTTTGCTGTGAGAATTTTAGGTCTTACTTGTAGCGCTTCTGGATGCGAGCGTAATTGGAGTGTGTTTGAACAACTTCATAGCAAGAAACGAAATAGGCTTGCTCAAAGTCGTTTGAATGATCTAGTGTTCATCAAATACAACAGAGCACTAAAACGTCGATACAACCTACGAGATATTGTCGACCCCAT…
Novel_G000185	Novel_T004419	AACAGACATAAAAATAAAGGCATGGGTTCAAATAGAAGGTTTACAGCAAAAAAACTCAAAAGTCAAGCCACACCCAACTAATCTGCGGCAAAAATGATACAAATGATCATCAAGAAGTACCTTCAAACTTCAATTCTTAACATTGACAACATGAAATGTGCAGATTATCCTTGTAGTAGTCTTTACAAGTAAGAAAGGTATCAAATATTTCGAAAACAAGTGGCGACTGATCTATCTGCCCCTCTTCCAATTTGTCCCAAGAATCATCCGAATCTATGTGTTATGTAAGAAGCTTTCCAGGAGTGCTGCTCCTAATGACATAACAGTAACCGGGAAGTTCAGAGGCACATTCAATTTCCTTCTCTTCATTCTTGCCAGTCATGTGGTTGGAGCATTTTG…
Novel_G000186	Novel_T004439	GGAATTGATGGCGGTTGTCCTTTCGGTGCAAAAATGGAGACATTATCTCCTGGGCAGAAAGTTCACAATTGTTTCAGATCAGAAGGCTCTGAAATTTCTGTTAGAACAGAGGGAAGTTCAGCCTCAATTCCAAAAGTGGCTCACAAAACTTTTGGGGTATGACTTTGAGATCTTATACCAGCCGGGTCTGCAGAATAAGGTGGCGGATGCTCTCTCAAGGAAGGACCATTCGGTGGAGTTAAATACAATGACAACCACAGGCATAGTTGATATAGAGATAATAGAGAAGGAAGTTGAAATGGATCAAGAACTTCAGAAAATTATTGCCGAACTTAAGGGAGAGGTGGATCAAGGTGGGAAATACCAGTGGAACAATGGCAGGCTGCTATATAAAGGAAG…
Novel_G000187	Novel_T004580	AAAACATCAACAAACGATGTTTCCTCACCGGCCGTCGCCTCCCTCACGGCTCACTCCCGCCCTTTACCCGCCGGCGTTCCGGCTCTGCCCATTCCGACGCCGCCTCTCCATCATTTCCTTTTGGAATTGTTTCTGATCTAGTGATTGTGCACTTTAGCTAGGTTTCTGCTCAATCTTCTCACAGTACTTGTCTACTTGATAAACTTTAGTACTGTGAAGGGAATACATCCAAAGATGGGGCGCCCCAAGCTGCATACTGGAATCAATGCAATTGAGGAAGAACAAGAGGAGTGTGATGTCACATTCACATATATGAATAAAACTGCTTTGGCTTGCATGATCAATTCAGAAATTGGTGCTGTATTGGCCGTTATGAGAAGAAATGTAAGATGGGGAGGT…
Novel_G000188	Novel_T004581	TTCCACCGTCGTACAAAACATCAACAAACGATGTTTCCTCACCGGCCGTCGCCTCCCTCACGGCTCACTCCCGCCCTTTACCCGCCGGCGTTCCGGCTCTGCCCATTCCGACGCCGCCTCTCCATCATTTCCTTTTGGAATTGTTTCTGATCTAGTACTGTGAAGGGAATACATCCAAAGATGGGGCGCCCCAAGCTGCATACTGGAATCAATGCAATTGAGGAAGAACAAGAGGAGTGTGATGTCACATTCACATATATGAATAAAACTGCTTTGGCTTGCATGATCAATTCAGAAATTGGTGCTGTATTGGCCGTTATGAGAAGAAATGTAAGATGGGGAGGTCGATATATGTCAGGTGATGATCAATTGGAGCACTCTTTAATTCAATCACTGAAG…
Novel_G000189	Novel_T004697	CTCTACTTCATCATCAAAAATCTCTGTCAACCGCTCGATCTGATCGTCCCCTACAATTCTTTTCTTCCACTAAAATCAACAGGTTGTTTGACTAAAAATCTCTGTTCTCCAAAGCTGAAACTCTCTGTATTGCTCGCTCTCAGAATTCATAAAAAGAAAGATATGTGGTTCTGGACCTTCTTTCAAGGGATTCTGCTGTTTGCAAATGCCTTTGCAATTCTGAACGAAGATCGTTTTCTTGCTCGGAGAGGATGGACATTAGCAGAGATGTCGAGAGAAAGAAGAAGCACGCTCAAAGGCCAGGTAATTGGGCTCATCCATGCATGTCAATTCTTGAGACTTCCACTCATTCTTCTCAATATCATCACCATCATCGTCAAGCTCTTCTCTGGTTGATTA…
Novel_G000190	Novel_T004710	TCCAATTTGAAGGAATGGATATATCCCTTTATAGTGAAAGTGAAAGTAGGAGTATAAACTTGGGGAAAATCTAGAGCAATGGAGCCTTTAAATTATAGCTCTCTTCCCAAATCTGTCATTCAAAATCAGACCACAAAATAGATGTTCGGAAGTTTCATTATCACCATTTGCAAGCCTAAGTTTCAGATCATGATTTCCTATCTGTTCCTCATCTTCTGTTTGGCAATCTCCATCTCACTTACAAGTGGAGAACAGCTAATTTTAGTAAACAACTGTAATGAAAGTGTCTGGCCTGGAATACTCGGAAATTCAGGCCAAAATACACCAATGGATGGTGGTTTTCATCTTGGCAGAGGCAAGCACGTAGTGGTTGAAGTGCCAAAGAAATGGTCAGGGAGG…
Novel_G000191	Novel_T004729	TTGTGATTAAAATAACTTTCTCGATGCAGTGTTAGCATTTAAAAAGAAATTGATACTTTAAAGAGAGAGAAAAAAAAAAACTATTATGATTTGAGAAGATTCCAAATCGGAAAGAGTTCGATGCAGATACCGTTAGTTAAACTAAGAACTTGAATAAGGACACCAACGCCCCACCTTGGGGCGGCGAGCGATTGCGAAAACGGGGAAAATGTTTACCCATATGAGCATATATAAATTCGTTATTGGCCAGCTCTAATTCGATTTTCGCATCAAACAAACACAAAATTTTGAGCTCGATCCACTTTAACTTAATCGAAATACTAACCCTTTTGATTGTCTTCACTTTCAGCCGGCGATTCTTCACCTTTGACTTCACTCTATTTGGGTTTTTTTTTCTCT…
Novel_G000192	Novel_T004744	CCGCCGTAGAGTTCCGGCCTGAAGAAAATAAATGGCTACTGCAACTGTCGTATTGGAAGTTCGTCCCCCATCATTGGAAGCCGACGCCGAACAACCTCCGCTCTTCGACGGAACCACCAGGTTATATATGGCTTACTATTGCCCATTTGCACAGCGTGCTTGGATCACAAGAAATTATAAGGGATTACAAGATAAAATAAAATTAGTGCCTCTGAACCTTCAAAACAGGCCTGCTTGGTATAAGGAAAAAGTGAACCCTACAAACAAGGTGCCAGCGTTGGAACACAATGGGAAAGTTATTGGTGAAAGCCTTGATTTGATCAAATACATAGATAGCAACTTTGAAGGCCCTTCTCTTTTCCCAGACGATGCTGCTAAAAGACAATTCGGTGAAAAGTT…
Novel_G000193	Novel_T004794	TTTGAATTCATCAAAGTGTTTAGTTTGAGTGATGCATCAAATTGTTTGAAGTATTGTGATGGGAAGAAACCTAAATTGTTAGGGAAATGTTGTAAGTTGACTACCATATGAAAGAAATAATACTAAATGAAAAGTGTGGGTTAATTGGAATTTGGCGGTCCCTTTCTCTCTATGAACAAACTAATCCAATTCCTGATAAGTGGCGGAGAGAGTAGCAGCAGCAAAAGAGTTTAGCTAAAATAAAACACCACACAATATCATACCTTCCATCAAACCTCCTTTCACAATGTATTTATACACTCCCATTCCTTCACCATTTCATCTCCAAATTCTCCTTCCCCAACACAAATGGCAGCCTCATCCTCAAATCCCACCTCCTCTAACCCCTTCTGGTACCAG…
Novel_G000194	Novel_T004799	AATCGATGACTTTTGACCCATGAATCAATGACTTCTGTAGATACATGGAGTTTGCAATAACTTATAGACTAATCTCATTGGGTTAGATGTGAGTTAATATAATTGGGTTAGATGTGAGTTAATATAATTGGGTTAGATGTGAGTTAATATAATTGGGTTAGATGTGAGTTAATATAATTGGGTTAGATGTGAGTTAATATAATTGGGTTAGATGTGAGTTAATATAATTGGGTTAGATGTGAGTTAATATAATTGGGTTAGATGTGAGTTAGTTGGAGAAAAGATGTTGTAGATCAAATTTGGGCAAATGGATCCAATTTCTACTGAATCAGCTTAGGGCTATGAAGATATAATATTCTTCTGTGCTCCAAGTTTTCATATATTCTTTTGTGCTCCAGC…
Novel_G000195	Novel_T004987	ATTGAAGTCCTCGCCATTGCTAAGCTCTCAATATCCATTTTCCGATATCATTTCAACCAAAGAAATCTCTCAGATTTTTTATAATCTCTGTTCGAGTTGCTGAGTTTTCGATTCAATCATCTTCTTTTTTTTTTTTTTTTTTCTATGTAAGTAATTGCAGTTACGTTCTTAATTTCACTCTTCTTCTGCTGACGGATTTTTCACTTCTTCGCTTATCTCTGTACTGGATTTCCGTGTTGATAGAAGAAATGGAGGTTGGGAAGGAACAGGTGACTCATGAGATTGTTAAGCCTCGTAATGACAAAAGAGAGTACAGAAGAATCGTCCTTAAGAACTCCCTTGAAGTTCTACTCGTCAGTGATCCTGATACCGATAAGTGTGCTGCTTCCATGACTGTTG…
Novel_G000196	Novel_T004988	ATTGAAGTCCTCGCCATTGCTAAGCTCTCAATATCCATTTTCCGATATCATTTCAACCAAAGAAATCTCTCAGATTTTTTATAATCTCTGTTCGAGTTGCTGAGTTTTCGATTCAATCATCTTCTTTTTTTTTTTTTTTTTTCTATAAGAAATGGAGGTTGGGAAGGAACAGGTGACTCATGAGATTGTTAAGCCTCGTAATGACAAAAGAGAGTACAGAAGAATCGTCCTTAAGAACTCCCTTGAAGTTCTACTCGTCAGTGATCCTGATACCGATAAGTGTGCTGCTTCCATGACTGTTGATGTTGGTTCGTTCAGCGACCCCGAAGGTCTAGAGGGTTTAGCCCACTTTCTTGAGCATATGCTGTTTTATGCAAGTGAAAAGTATCCCCTGGAGGA…
Novel_G000197	Novel_T004989	GTTGGGAGCATTTTGCTAAAGAAACCTTTCCATAACGACCAAAACAGAAAAAGACATAAAAACCAAATTCAAGTCGTCGCCATTGCTAAGCAGTCAATATTCATTTTCCTCTCAAACTTTCTTCGATTATCATTTCAACCAAAAAAACTTCTCTGATTTTTCATAACCACTGTTTGAGTTAGCTCAGTTTTCGATTCAATCATCTTCTTTTTTTCCATAAAAAATGGCAGTTGGGAAGGAACAGATGACTCATGAGATTGTGAAGGCTCGTAATGACAAAAGAGAGTACAAAAGAATCGTCCTTAAGAACTCCCTTGAAGTTCTACTCGTCAGTGATCCTGATACCGATAAGTGTGCTGCTTCCATGACTGTTGATGTTGGTTCGTTCAGCGACCCCGA…
Novel_G000198	Novel_T005032	CTTTTTACCTTTACCCAAATTCTCTTCTGCTTCTTTTCTCCAATGGCGTCCTCTAATCCTAATCTCTCAATTCCTTCAATGGATTTCCTCTGAAACTTCCCAACCACCTTCTTTCCTCCAACGACACACAGTTTAGGCCATGGCATTGCCATTGCATTTGGCGTTCTGGATCGCCGATATGGTTTGGGGTGCCTTTAGCGGCTGTATTTCTTCTTGTTTGGCCTTTGCCCACGAAGTCGCCAGCTCCATCAGAACTGGCGATATTGGCGCTTTTCACATTGGCTGGCCGGGTTTTCTTCGATTTTCATCAATTCTTAACTCTCTGAGATGGTGGCTTGGCTTGGGGGCTTAGATAACTTGAGGTTGAAGACTTGCCTGTAACTATGAAGACTATTCACC…
Novel_G000199	Novel_T005033	CTTTTTACCTTTACCCAAATTCTCTTCTGCTTCTTTTCTCCAATGGCGTCCTCTAATCCTAATCTCTCAATTCCTTCAATGGATTTCCTCTGAAACTTCCCAACCACCTTCTTTCCTCCAACGACACACAGTTTAGGCCATGGCATTGCCATTGCATTTGGCGTTCTGGATCGCCGATATGGTTTGGGGTGCCTTTAGCGGCTGTATTTCTTCTTGTTTGGCCTTTGCCCACGAAGTCGCCAGCTCCATCAGAACTGGCGATATTGGCGCTTTTCACATTGGCTGGCCGGGTTTTCTTCGATTTTCATCAATTCTTAACTCTCTGGTTTGTATTGTGGCCTTGAATTTTTCCGTTTTGTTTTCATTTCTGAAGTTTGAATGTTTGTTTTTGTCTAGTAA…
Novel_G000200	Novel_T005156	GAAAAACCCTACGTTTTACATGGCACTGTTTCTTCTTCCTCTCCCTCTCACTTGCTCCACCTGATTTTCCTCGCCGTCTTCTCCGTCGTCCTAATTGTTGCTGATTTTTGTTGTCGAATTATACTCTATATCGGCCTCTCATAGCCACAGCTGTGTCGGTTGCCTTTGAACTTTATAGGCTCCAAACAGGGAGTAACACTCTATTGGTAGTTGGTACAAACTTCCCATTGTGTTGATACGACCAGAGTGTTAGACGTAGGCATGGAAATAAACCTTGCAGACATTCCTTTCGACTTGGACTTCCATCCATCCGATCAATTGGTTGCAGCTGGTGTGATCGGGGGCAATCTTCACTTGTACCGTTATGATGCAAATGCTTTACCCCAAAAGCTTTTTAAA…
Novel_G000201	Novel_T005175	TATTTAGAAGCAGACTTTATATCTCACTCAATCATCTACCTCATGATCAGAGTGTCCTTTTCCTGAAAGACTGCCAACCCATAAATTATTCCAATTTCTTCATATATATCTCTAATTGCTTCTTCACATCTCTATTATATTTTCACCCTCTAAGAAGAGAAAATAAACCATAATCTCTCTCTCTATCTCTATCTCTTTAAAGTTCCACTTCCAATGACTGAAGAAGAAGAAGAGTCTCTGAAAAGAAAAGTGAAACAAGTTGTTGAAGGAGACATAAATGAGGCTGAAATTTTGAGAAATGGAGGAGTCAATAAAGGCGCTTGGACTGCAGAAGAAGATCAAAAATTGGCTCAAGTTATTGCCATTCATGGTGCAAAAAGGTGGAAGTCCATTGCAGCT…
Novel_G000202	Novel_T005363	TCTTAAGGTCCTCTGTTCTCTCTCTCTCTCTTTCAAACTGTGTTCATCTCTTTTTTAACTCTCTCCAACCCTCTTCTTCTCTTTCTCTGCACTTGTTGAACCTGAGAAGCTTAGCCCAGACAAGCTTCGAACTGAAGGCAATGAGCCAGCTTCAGAAGAGCCTGTCATTGGCTTCTTCTTCCAGTAACGCCATTTCTTCCTCTGTATTTTCAACAGCGTTCTCTGCTTTTTCCTCCTCCAGACTCCGTCATTTCACCACCAAGTTGCAGGGCAGCACTCTTCAAAATTATACTAGCAAATACACACCCGTTTTACCATTTTCCACTGCTTGTAATTCAGCCAGATGTTCTCAGCTTGTTTTTAGAAAAGGTGGAGTAACATTTGCTGTCACAACTGAAC…
Novel_G000203	Novel_T005364	TCTCTCTCTCTCTCTCTCTCTCTCTCTCTCTCTCAAACTGTGTTCGTCTCTTTCTTTTAACTCTCTCACTACTTGAACGTGAGAGAAACTTAGCTCAGAGACGCTTCCAACCGAACATTCTCGCCGATTGATACTATTGAGGCAATGAGCCAGCTTCAGAGGAGCATGTTATTAGCTTCTTCTTCTAGTAATGCCATTTCTTCCTCTGTATTTTCAACAGCTCCGTCTGCTTCTTCCTCCTCCCGACTACGTCCTTTCAGGATAAAGTTGCAGGGCAGCACTCTTCAAAATTATACTAGCAAATGCATACCTGTTTTACCATTTTCCACTGTTTGTAATTCAGCCAGATGTTCTCAGCTTGGTTTTAGAAAAGGTGGAGTAACATTTGCTATCAAGGCT…
Novel_G000204	Novel_T005474	GTCCCGTCCTCTCCCCTCGCAGTCTTTGGTCTCTCAGTCTCTCTCATCCGAGGCCCCCCGCCTTTGTCACGCGCACGCCGTTCGCCGTCGTTCTTCATGCCTCTCTCTCTCTCTCTCGTCTATCACATCTGAAGCCCCCTCTCCTCATCATTTTCTCAATCTCTGTCACGCCGTTGGCTTCACGCTAAGAATTCAAAATTTCAAAATAGAGGTTAAATATGGAAAGGGAAGAGGCTACAACGGAGGAGACAAAGGAGACTACAAGAATTAAAGCTACCATCAATGTTGATGAAGAGGAAGTTGATGAGACTCCAACAAAAAGGCGAAGGAATATGCCGGTATCCATAGTTTGGCAACATTTCGAGAGGTTAAAAGACACCATTATGGATGTGGATGTGA…
Novel_G000205	Novel_T005475	GTCGGAGTCGTCCCGTCCTCTCCCCTCGCAGTCTTTGGTCTCTCAGTCTCTCTCATCCGAGGCCCCCCGCCTTTGTCACGCGCACGCCGTTCGCCGTCGTTCTTCATGCCTCTCTCTCTCTCTCTCGTCTATCACATCTGAAGCCCCCTCTCCTCATCATTTTCTCAATCTCTGTCACGCCGTTGGCTTCACGCTAAGAATTCAAAATTTCAAAATAGAGGTTAAATATGGAAAGGGAAGAGGCTACAACGGAGGAGACAAAGGAGACTACAAGAATTAAAGCTACCATCAATGTTGATGAAGAGGAAGTTGATGAGACTCCAACAAAAAGGCGAAGGAATATGCCGGTATCCATAGTTTGGCAACATTTCGAGAGGTTAAAAGGTGATCCTAACGAAC…
Novel_G000206	Novel_T005491	TGACCATGTAGTTCTGATTTGCCGCCGTCCGCGTAAAGCTAAACAACAATCAATCAAAGCTTTGACACTTCAAATTTCAATCCTCCATCCCTCTGCGCGGAGAATTCGTCATGAGAAAGTCCGGAAGAGGAGGCCGGTGGACTGATCACAATCGAAACCAAGAGGTTTGGGTCGCCAAACACACCAATCAATCACACAATCACGCTTCTACTTCCGCCTCACAACCTTCCCACCTCTCTAATCCTTCTCCTACGGCTCGTAATTTCAATTACGACCATCGCATTCCCCGCCGTCCCCGTCCTCACCCTGTCCACAAACCGGAGGTCACTGCTTTGGCCGATGGAATAGAGACTTTCACTTTCGACGAAAAGCCTGTGGACTTCGATGTTGCGAAACCTA…
Novel_G000207	Novel_T005492	TGAAATTTGGGTTTCTTAAATCTTAATTGCTCTGACCATGTAGTTCTGATTTGCCGCCGTCCGCGTAAAGCTAAACAACAATCAATCAAAGCTTTGACACTTCAAATTTCAATCCTCCATCCCTCTGCGCGGAGAATTCGTCATGAGAAAGTCCGGAAGAGGAGGCCGGTGGACTGATCACAATCGAAACCAAGAGGTTTGGGTCGCCAAACACACCAATCAATCACACAATCACGCTTCTACTTCCGCCTCACAACCTTCCCACCTCTCTAATCCTTCTCCTACGGCTCGTAATTTCAATTACGACCATCGCATTCCCCGCCGTCCCCGTCCTCACCCTGTCCACAAACCGGAGGTCACTGCTTTGGCCGATGGAATAGAGACTTTCACTTTCGACGA…
Novel_G000208	Novel_T005521	TTGAATTCTAGGGTTTTTCTGGTTTCCCAACTTCATCAAATCTTCTTCCGGAGATCTTGTGGTCAGTCAAGCAGCAATGACGAAGAGAACCAAGAAGGCAGGCATTGTTGGAAAATATGGTACCCGATATGGTGCCAGTCTGAGAAAACAGATCAAGAAGATGGAAGTCAGTCAGCACAGCAAATACTTCTGTGAGTTCTGTGGAAAGTACGCAGTCAAGAGGAAGGCAGTTGGAATTTGGGGTTGCAAAGATTGTGGTAAAGTGAAAGCTGGTGGTGCCTACACTCTCAACACTGCTAGTGCTGTGACAGTGAGAAGCACTATTAGGAGGCTGAGAGAGCAGACTGAAAGTTAAGCCATCTTCACTGCGTATTTTCGCCCTCTTTGTATGGAAAAAGA…
Novel_G000209	Novel_T005554	TCTCTCTATAAATATAGAGAGTTGAGATCATTGAGATGGTGTCAAGAAAGAGAGAGAAGCAAAGAAGGAAAAAATAATGGAGTGGAAAAAAGTTGCTTTAGTTGCAATGATGGGGATGTTGCTTATGGCTACTTTTACAGAGTCAGTCGGTTTGGGCGTGGATGAGGAGATCATTCAATTAGTTTCGGACGGGCTGAATGAGTACTCACAAAATATTGGAAAGGAAACTGTAGGCTGCCCTCGAATCCTTATGCCGTGTAAATCCGACCACGACTGCTTAAGTGGCTGCACTTGCAAACGAAACGGCTATTGTGGTTGACTCCTAGCCGTGATGTTTCGTTCGGATCTTCTACGGTGTCTTTGTTTGTGTGTGTTTTCTATTTTATGAAAATAAATGCA…
Novel_G000210	Novel_T005582	AGAGAGAGAAGAGGGAGGGGGCTCTACTCTGTTTCAGTATCTTTCTTTGTTCGTAGAGAGAGAAAGTGAAAAAAAGGAATTGAAAGCAGAAAAAAAGGGTCGAAGCAAAGCAATGGAGAACTAATAACAAAGAAATATCAACCAACTCCATTACCCATTAACCCCATTTTTCATTGCTTACCAACAACAACAGCAACAGCAACAGAGGATCGCCACTTTGTTGGCCACAGAGGAAGAAACCCTCCATTAATATTCAAACACTTCCTTCAGTTTTTCTGTTGTAGATCTTTTTTAGTTTTCGGAAGTACCCACCAATTCTGATGCATTTTGGTGCGTTTGGGTGTTGATTTTTTTTTTTTTGGGAGAATTTCATTTCTTGCGTGGACATAGACGAAGGTT…
Novel_G000211	Novel_T005583	AGAGAGAGAAGAGGGAGGGGGCTCTACTCTGTTTCAGTATCTTTCTTTGTTCGTAGAGAGAGAAAGTGAAAAAAAGGAATTGAAAGCAGAAAAAAAGGGTCGAAGCAAAGCAATGGAGAACTAATAACAAAGAAATATCAACCAACTCCATTACCCATTAACCCCATTTTTCATTGCTTACCAACAACAACAGCAACAGCAACAGAGGATCGCCACTTTGTTGGCCACAGAGGAAGAAACCCTCCATTAATATTCAAACACTTCCTTCAGTTTTTCTGTTGTAGATCTTTTTTAGTTTTCGGAAGTACCCACCAATTCTGATGCATTTTGGTGCGTTTGGGTGTTGATTTTTTTTTTTTTGGGAGAATTTCATTTCTTGCGTGGACATAGACGAAGGTT…
Novel_G000212	Novel_T005695	TATACACAACATTCCAAATCATATATAAATAGTCTCTCACCTAACTACAATTTAGATATGGAGAAGTCCTCGACCAAGTTGGCTTGCATGTTATTGATGTTCTTTATTGTCTCTGGAACATTGTTCGTCTCAGAAGCAAGAAATGTAGTAAACGTTCCATGCAATACTGAGCAAGATTGTTCGGATCCAGTCAAATGTATTTGCAACTTCCATCTATGTTTTTGCAAGGGAGAATCTACAAAGACAGTCTTGGACAAAATCCTTCCAAAATCTTTGAGAGAACAGAAAACAACTCCTTGAAGACTCATTCCTACTTCAGTTTGTACTAACACGCACACACACATATATAGTTCATGAGATTTGGAAAAGAAATGTATTTTCCTATATTATATAAAATAA…
Novel_G000213	Novel_T005740	CAATAATGTTCTATGCAAACTAATAATGCTCATCTTAGTTACCATCATCTTTGCCTCCAATAATGTTGCCACAAGGAACTTGCTTTCTACGCCTCATCTTGCTCATGTGAAGCATGAGGAGATGAACAGTACAAGTGTTCCTGCACCCAATCCTCCACAATCACCACTAGACAATGGACCATGGGATGACCCTTGGAGTGGAAACTTTTGAGGATATAACACTGACTTTCTTTCTTTTCGTTTCTTTTAGGTGTAGTCTGGGTGCTTTCATCTTTTGTGCATCCCAAAATATTTCTTCTTTTGCAAAATTTGTATGCGTATAATCAAAAGGTGAAAAGTATAGTGGACAAGTGCAGGTTAGGTTGGTTGTACTTAATCAACGTTCATTGAATGAAAATT…
Novel_G000214	Novel_T005741	CTCCACACAGCGCTATGGCTTCTAGTAATGCTCTATGCAAACTAATAATGCTCATCTTAGTTACCATCCTCTTTGCCTCCAATAATTTTGCCACAAGGAACTTGCTTTCTATGCCTCATCTCGCTCATGTAAATCATGATGAGATGACCAATTCTCCACCAACACCACCAAAAGATGGACCATGGGGTGGAAACGTTTGAGGATAACACTGCCTTTCTTTCTTTTCTTTTGTTTTAACTAGACGTTTCCATAACTTGTTATTTCCATACATCTAAAATAAGAAATGAACTTGAGTGTAGTTGGGATGAACAATATTATCTTCTTTCGAAATATGTATTTGTATGGTCAAAAGGTGGAAAGCATAGTGGTTCGATGCAAGTTAGGTTGGTTGTACTTGAT…
Novel_G000215	Novel_T005882	TGTACATTGCGATCATATTTTTCCACTCATTGATATTTTTTTCTCTAATTCCAGTGCAGAAAACATAAAGATCTTTATCTATGTATGGCAAAGTGCCCTAGTGGGCCATCCGTGAAGTTTTTAGTTAATGCCATGCATACAATGGAAGAATTGAAGCTTACAGGGAACCATCTGAAAGGTTCCCGTCCAATTTTGACATTTTCATCAAATTTTGATAAAGATGTCCACTAGAAACTTCTGAAGGAAATGATTATTCAGATTTTTGGAACTCCTAAGGAGCATCGACATTCTAAACCGTACCATGATCATGTATTTGTTTTCTCTATTGTTGATGACCAT
Novel_G000216	Novel_T005922	AAGGAAGTATGATAAACTTTTTATTGCTGATGGGGCTCATTGCTAATGAAATTTTTTGTCTTCATCATTTTACTTTGTTTACAAGAATGGTTTGATCAGTATAAATCACCTGGTTTTGCCTTCAATATTTCTTTCTGATCTATAGCTTATATGTGGCTTTGGAAGACTAGTGACAATGTATGGATGCGATAAATACAATATTAAAACAGGCCTTGTTTCCCTTGCAAAGGTGAAGTTAACTTAAACAAATATCTTGCTTAGTTTAGGCTTTTCATTGTTTCTATCAAGCCTAATAGTCTACTGCACACTGTAGACACTATCATCGGCTTACCTTCCTGATCATTAACCCTGAAATCTTTGATGTGGTATTACTCCCATAGCAACGAGCTAGGTATACTG…
Novel_G000217	Novel_T005952	CGTTCGTCAACTATAGAAGAACATGCTAAGTACACAGCCGAGAATAGCTCGCGCATGTTCCGTTCCTACCATGGCGTCAACTCAAACACCATATCCATTTTCGTGCTCATTTTTCATTTCTCTTCTTCAATCTCTTTTTGCCTTCTTCAATCTCTTACCCATCCCATCTTTAAGCACCTGACGGCGAATCCATCTTCTCCGGCTATCCTCAGGTTGTCCAACTCAATCGCAAAGAGCCAGACCGTGGTGACTCATCCTACAACTGCAAGTGACCCACGAACAGCTCGTGCGACGTCTCCCAGTTCTTCTTCTCCTTCTTCTCTTGGCAACAAGCTATAGTGGCGCTAGGTAACCTACGAAAACATATGAACGACGGCGGCGCTTGGCTGTGCATTCTGA…
Novel_G000218	Novel_T005953	CATTCACCATGCGTTCGTCAACTATAGAAGAACATGCTAAGTACACAGCCGAGAATAGCTCGCGCATGTTCCGTTCCTACCATGGCGTCAACTCAAACACCATATCCATTTTCGTGCTCATTTTTCATTTCTCTTCTTCAATCTCTTTTTGCCTTCTTCAATCTCTTACCCATCCCATCTTTAAGCACCTGACGGCGAATCCATCTTCTCCGGCTATCCTCAGGTTGTCCAACTCAATCGCAAAGAGCCAGACCGTGGTGACTCATCCTACAACTGCAAGTGACCCACGAACAGCTCGTGCGACGTCTCCCAGTTCTTCTTCTCCTTCTTCTCTTGGCAACAAGCTATAGTGGCGCTAGCCACTGAAATCACCTGCACAAAAGTTTGAAGGGGTTAAGT…
Novel_G000219	Novel_T006028	AGGATGATCGTGTGGGAGGCAAAGAGAATCTGAATGTTAATGGAGAATAAGCTGAGTTCAGGATTGAGGATTTTGCTGGAAATCAATTGATTGATTCCTTCTCTCTCTCTCTCTCTCTCTCTCTCTCTTTACTTGAACCCAGTAATGGGTAAGCAACAATCCTTGCGCAGCAAAGCAGTCCATTTTGTCTCCGATATCACTACCGTTCTTCTTAACCCAATCTCTGATAAACCTTCCGCTACAGCCTCTGCTCATCCTCAACATCATCATTCACCTGAAAATGCGACTGACCTTAAAGACGACAGTGATCTAGGTTCAGCTAGTGAACAGGGTTCCGAATTTTCGGAAGATGGCCCTGATACATCTTCATTTACTGCATTCCTGTATTCCCTTCTGTCG…
Novel_G000220	Novel_T006029	TGATAAAGCAGAGCTAAGAGATTTTCTTCGTTGATCATTTTGTAGAGAGAAAAATAAGGGGTTTTTTTCAAGTTTTTATGCTGCATAATCCATGGCTGAGAGGAGGTGAGAGGAGGATGATCGTGTGGGAGGCAAAGAGAATCTGAATGTTAATGGAGAATAAGCTGAGTTCAGGATTGAGGATTTTGCTGGAAATCAATTGATTGATTCCTTCTCTCTCTCTCTCTCTCTCTCTCTCTCTTTACTTGAACCCAGTAATGGGTAAGCAACAATCCTTGCGCAGCAAAGCAGTCCATTTTGTCTCCGATATCACTACCGTTCTTCTTAACCCAATCTCTGATAAACCTTCCGCTACAGCCTCTGCTCATCCTCAACATCATCATTCACCTGAAAATGCGA…
Novel_G000221	Novel_T006030	TGATAAAGCAGAGCTAAGAGATTTTCTTCGTTGATCATTTTGTAGAGAGAAAAATAAGGGGTTTTTTTCAAGTTTTTATGCTGCATAATCCATGGCTGAGAGGAGGTGAGAGGAGGATGATCGTGTGGGAGGCAAAGAGAATCTGAATGTTAATGGAGAATAAGCTGAGTTCAGGATTGAGGATTTTGCTGGAAATCAATTGATTGATTCCTTCTCTCTCTCTCTCTCTCTCTCTCTCTCTTTACTTGAACCCAGTAATGGGTAAGCAACAATCCTTGCGCAGCAAAGCAGTCCATTTTGTCTCCGATATCACTACCGTTCTTCTTAACCCAATCTCTGATAAACCTTCCGCTACAGCCTCTGCTCATCCTCAACATCATCATTCACCTGAAAATGCGA…
Novel_G000222	Novel_T006031	TGATAAAGCAGAGCTAAGAGATTTTCTTCGTTGATCATTTTGTAGAGAGAAAAATAAGGGGTTTTTTTCAAGTTTTTATGCTGCATAATCCATGGCTGAGAGGAGGTGAGAGGAGGATGATCGTGTGGGAGGCAAAGAGAATCTGAATGTTAATGGAGAATAAGCTGAGTTCAGGATTGAGGATTTTGCTGGAAATCAATTGATTGATTCCTTCTCTCTCTCTCTCTCTCTCTCTCTCTCTTTACTTGAACCCAGTAATGGGTAAGCAACAATCCTTGCGCAGCAAAGCAGTCCATTTTGTCTCCGATATCACTACCGTTCTTCTTAACCCAATCTCTGATAAACCTTCCGCTACAGCCTCTGCTCATCCTCAACATCATCATTCACCTGAAAATGCGA…
Novel_G000223	Novel_T006075	CTTTCCCATCTCAATGGATTAGTCACATTATTTCAGTTGTTTAATTTTTCTTTATTTATCTATATTTTTTGCCATAAATTATGTAGATATGAACAATCCTTATACTGATATCCACATTTAGAATTTGGATAAAATTGAAAACATCTCTGGTTTGATACAGATGAATTTCTGATGAAAAGAAAAAGTCACCTAGTCCCCAATTTCAGAGATAAATATTAATGAGAAGCCAACAATACACCCTGACTTGGCAACTGCAGCCAAGATAGATGAAGGTCCTCCCTTCACAAACTCCGGGATCAAAGAAGACTTTACCTTGACAGTTTGCCTTGCCTATTATTTCTTGTTTGCTTGACAGAAAAATACTCTAGACAACCATAAGCTTATATATTTGGTACGTCA…
Novel_G000224	Novel_T006093	TTTATAACTCTTCCCCGTACACTTCTCAACTTGTCTCCCTCTCTTTCTTTCCTCTCAATCCTTTTTCAACTCCCCCATAACCCTACCTCTCTTTTCCTTAAGTCTGTTATAATCCCTCGCTAACCCTCCCTTAGTTCGAGTGTGAATTCCTCATTTTCGTTGGTTAGTTTGCTTTATCTTCACCGTTTTCATCTTTCACCGATTTGGTCTTCACCATTTTCTTCTTTCATTGTTTTTATCTCCACCGTTTTTGTCTTTACCTTTTTTGTCTTTATCGTTTCGGAGGTTGGTATCATATTTCCATTTTTTCAACTTTGGTTTTTGTCGTCCCCCATCGTTTTTGGGTTTCGTTGACTGGCTTCATTTTCTCCACTTGAGACCTCTGAAACCCTTACCTGG…
Novel_G000225	Novel_T006104	ATTTGAGATGACTGATATGGGTTTACTTCATTATTTTCTTGGTATTGAAGTTAAACAAGGTGATAATGAGATTGCAATTTTCCAAAAGAAGTATGCAAAAGATTTGTTGAAAAAGTTCAAAATGGAAAATGCTTATCTTGCCAGTACTCCTATGGAATTGGGTTTAAAGTTAAGTAAGCATGATGTTAGTGAAGCTTTTGATGCCACCATTTATAGAAGTTTGGTTGGAAGTTTAATGTATTTAACTACAACTAGACCTGATATTATGTTCTCGGTCAGTTTATTGAGTAGATTTATGACATCACCAAAGAGAAGTCATTGGGAAGCTGGAAAGAGAGTTCTTAGATACATTCTTGGAACTGTTGATCATGGAATCCACTATAAAAGGAATGTGGATAA…
Novel_G000226	Novel_T006109	CGGAAATCCATAAAAGTCGAAACCGCAACGGTTCTTTCCTTATTTTCGCGCACTCAGCTAATGCCTTCCGTTAATGGCTTCCGAATCTTCCACACCTAAACCCCTAGCAATCGACTCTTCCCTCTGCTTCGTCACTGCTATCGAATCGTTTTCGCGGCAACTGAGTTTATCTCTTCCTCCGTTGAAACTTCCATTCCGACCCCCTCCTTTTCCCTCCGATTTCCCCCAATCCAAACTCATCCCAAAATCCCGTTTCGTGGTCGACGCATTTGCCCACGCCGGCGATTACTCTCTTTCATATTTCCTTTCTCATTTTCATTCCGATCACTATGGTGGTCTCTCCCCTACCTGGTGCAAGGGTATTATCTTCTGCTCCCACCTTACTGCTCGCCTTTTGCT…
Novel_G000227	Novel_T006147	CTTTAACTCTTGCTTTTGCCGGTCAAATAATGGAGGCCATTCTAAAGAGTTACTTTGGATTCTCGGCGTTTAGGCCGTATCAGAAAGAAGTCATTCAGGGCATTCTTCGTGGGAAGGATTGCTTGGTGGTTAAGGGCACTGGAAGTGGGAAATCCTTATGTTATCAGTTACCGCCTTTGGTCGTTGGAAAGACTGGCATAGTTGTTAGCCCCCTTATATCATTAATGCAGGATCAGGTAATGGCTTTAAAGCAAAGAGGGATCAAGTCTGAATACCTTGGAAGTACCCAGACTGATTACACAGTTCAACACAAGGCAGAGAGGGGTCAATATAATATATTGTTCATGACACCAGAAAAAGCATGCTCTGTATCTACGAGTTTTTGGTCAAAATTAAAGA…
Novel_G000228	Novel_T006148	CTTTAACTCTTGCTTTTGCCGGTCAAATAATGGAGGCCATTCTAAAGAGTTACTTTGGATTCTCGGCGTTTAGGCCGTATCAGAAAGAAGTCATTCAGGGCATTCTTCGTGGGAAGGATTGCTTGGTGGTTAAGGGCACTGGAAGTGGGAAATCCTTATGTTATCAGTTACCGCCTTTGGTCGTTGGAAAGACTGGCATAGTTGTTAGCCCCCTTATATCATTAATGCAGGATCAGGTAATGGCTTTAAAGCAAAGAGGGATCAAGTCTGAATACCTTGGAAGTACCCAGACTGATTACACAGTTCAACACAAGGCAGAGAGGGGTCAATATAATATATTGTTCATGACACCAGAAAAAGCATGCTCTGTATCTACGAGTTTTTGGTCAAAATTAAAGA…
Novel_G000229	Novel_T006149	AATGGCTTTAAAACAAAGAGGGATCAAGTCTGAGTACCTTGGAAGTACTCAGACTGATTCCACAGTGCAAGCCAAGGCAGAGAGTGGTCAATATAATGTATTGTTCATGACACCAGAAAAGGCATGCTCTGTTCCCATGAGTTTTTGGTCAAAATTAAAGAAGGCAGGAATTTGTTTGTTTGCCGTCGATGAAGCACATTGCATTTCAGAGTGGGGGCATGATTTTAGGGTAGAATACAAACAGCTGGACAAACTTCGCGATGTTCTACCAGGTCTTCCATTTGTTGCACTGACTGCCACTGCAACTGAAAAGGTTCGGAATGACATTATTAATTCTTTGAAGATGAAAGACCCACAAGTTACCATTGGTTCATTCGATCGAACAAATCTTTTTTATGG…
Novel_G000230	Novel_T006150	TTTAAAGCAAAGAGGGATCAAGTCTGAGTACCTTGGAAGTACTCAGGCTGATTCCACAGTTCAAGCCAATGCAGAGAGTGGTCAATATAGTATATTGTTCATGACACCAGAAAAGGCATGCTCTCTTCCCATGAGTTTTTGGTCAAAATTAAAGAAGGCAGGAATTTGTTTGTTTGCCGTTGATGAAGCACACTGCATTTCAGATTGGGGGCATAACTTTAGGGCTGAATACGAACTGCTGGACAACTTTCGTGATATTCTACCAGGTCTTCCATTTGTTGCACTGACTGCCACTGCATCTGAAAAGGTTCGGAATGACATTATTAATTCTTTGAAGATGAAAGACCCACAAGTTACCATTGGTTCATTTGATCGAACAAATCTTTTTTATGGAGTCAA…
Novel_G000231	Novel_T006151	TTTTACTTCTGCATCTTAACCTTAGAGTTTTACAGTTATCTATCCATTTTCAAATTTTATCAATAGGAAAGCTAATACTTTTTTGTAAACATCTACTCTCCTGTCCACCCAATCAATCTTATTTTCTTCGAATTATTTGAAACTGAAACTGACAATTAGAATAATCCTTCCTTCTTAACAATAGTATCAGTGCAAAAGGGGAACAATTTCTCGATTCTGCCAGACAGGACTGCCAACCACCTCTAGTTTTGCCAGTGACGAGTGAAATGATTGGTGAGAATGAAGATGACAGTGCATTAATTGAAGCTGGGAAAATGGATAACTTGGCCACTTTCAAGAGTGGACTTTCAGAGGCTGAGGAAAAACTTTTTCAGTTGCTTTTAGAAGAGAGAATGAAGC…
Novel_G000232	Novel_T006152	TATAAGGGATGAACTGCAAGTCATGGTTGCCACTATTGCTTTTGGTATGGGCATTGACAAACCAAACATAAGACAAGTGATACATTATGGCTGCCCAAAGAGTCTAGAATCTTATTATCAGGAAAGTGGGCGAGGTGGTAGAGATGGTATTGCTTCTGTTTGCTGGCTTTATTACACGAGAAGTGATTTTGCTAAAGCAGACTTCTACTGTGGTGAATCACAAACTGAAAACCAAAGAAGAGCTATTAGGGAGTCATTGATGGCTGCACAACAGTATTGCTCTATAGCAACTTGCAGAAGAAACTTCTTGCTCGGTTATTTTGGGGAAAGATTTCATTCTGATAAATGTGGAAATTGTGATAACTGCATAGTCTCAAAAAAGGAGCGTGACATGTCAAA…
Novel_G000233	Novel_T006153	AGAGGGATCAAGTCTGAGTACCTTGGAAGTACTCAGACTGATTCCACAGTGCAAGCCAAGGCAGAGAGTGGTCAATATAATGTATTGTTCATGACACCAGAAAAGGCATGCTCTGTTCCCATGAGTTTTTGGTCAAAATTAAAGAAGGCAGGAATTTGTTTGTTTGCCGTCGATGAAGCACATTGCATTTCAGAGTGGGGGCATGATTTTAGGGTAGAATACAAACAGCTGGACAAACTTCGCGATGTTCTACCAGATCTTCCATTTGTTGCCTTGACTGCCACTGCAACTGAAAAGGTTCGGAGTGACATTATTAATTCTTTGAAGATGAAAGACCCACAAGTTACCATTGGTTCATTTGATCGAACAAATCTTTTTTATGGAGTCAAGTCTTTTAAT…
Novel_G000234	Novel_T006154	TGTGGCACGCCCTTGAACGCGAAAGAATCAACACAGTCGTTTTCTTTAACTCTCGCTTTTGCCTAAGACCGCCAGAAAAGACAGCAGCACAGTCAAATAATGGAGGCCATTCTAAAGAGCTACTTTGGATTCTCGGCGTTTAGGCTGTATCAGAAAGAAATCATTCGGGACATTCTTCTTGGGAAGGATTGCTTGGTGGTTATGTCCACTGGAAGTGGGAAATCCTTTTGTTATCAGGTACCGCCTTTGGTTGTTGGAAAGACTGGCATAGTTGTTAGCCCCCTTATATCATTAATGCAGGATCAGGT
Novel_G000235	Novel_T006155	CAAAGAGGGATCAAGTCTGAGTACCTTGGAAGTACTCAGGCTGATTCCACAGTTCAAGCCAATGCAGAGAGTGGTCAATATAGTATATTGTTCATGACACCAGAAAAGGCATGCTCTCTTCCCATGAGTTTTTGGTCAAAATTAAAGAAGGCAGGAATTTGTTTGTTTGCCGTTGATGAAGCACACTGCATTTCAGATTGGGGGCATAACTTTAGGGCTGAATACGAACTGCTGGACAACTTTCGTGATATTCTACCAGGTCTTCCATTTGTTGCACTGACTGCCACTGCATCTGAAAAGGTTCGGAATGACATTATTAATTCTTTGAAGATGAAAGACCCACAAGTTACCATTGGTTCATTTGATCGAACAAATCTTTTTTATGGAGTCAAGTTTTTT…
Novel_G000236	Novel_T006156	ATTTTTTTGGCAGTATTTGAATCTTTCTGTTATCTCCTGGAAGAGAGGGAAACAGAGACGTGTTATTTTCTGTTTTATGCAAACAATAAGATTGAATTCTCAGTCGATTGGCTACGAGTTCCATCAGAAACACAAGAATTATTAGATGACAAATTGGTGGTAGCAATTTAAGGATTTGATGAATTTGCTCTTGTGACATAACGGGCTGAAGATTAACAGACCAAACTAGACAAGTAGACCAAACCGGTTTGGAGTCACCGGACAGAGCCGTTGATGGCTTTGATTACTGATGACAACATAACTCTAACCGGAAATAGGATGTGCCTATAATTTTGGCGGCACACGGAAGAAGTTTGCGTGGCTAGTGTTAGGGTTCAAATATAATTCTAACAGATCTGA…
Novel_G000237	Novel_T006157	TTTAAAGCAAAGAGGGATCAAGTCTGAGTACCTTGGAAGTACTCAGGCTGATTCCACAGTTCAAGCCAATGCAGAGAGTGGTCAATATAGTATATTGTTCATGACACCAGAAAAGGCATGCTCTCTTCCCATGAGTTTTTGGTCAAAATTAAAGAAGGCAGGAATTTGTTTGTTTGCCGTTGATGAAGCACACTGCATTTCAGATTGGGGGCATAACTTTAGGGCTGAATACGAACTGCTGGACAACTTTCGTGATATTCTACCAGGTCTTCCATTTGTTGCACTGACTGCCACTGCATCTGAAAAGGTTCGGAATGACATTATTAATTCTTTGAAGATGAAAGACCCACAAGTTACCATTGGTTCATTTGATCGAACAAATCTTTTTTATGGAGTCAA…
Novel_G000238	Novel_T006162	GGATTTCATTTGGAGGCGCCATAAAAACACAAACCCTTTTTTTTTGTTCTATCATCTCCTTCATCTTTTCTCTCTTCAAATTCCCAACTCCAATAATCCTCCATCCATGGCGGCCGCCGATCCCACTCAGCTTCATCAACTCTCCTTGCTTCTGGGTTCCGATCGTACCCACTTCGAAACCCTAATTTCCCATCTTATGTCCTCTTCCAATGACCAGCGTTCACAGGCTGAATCCCTTTTCAACCTCTGCAAACAAGCACACCCAGATGCTCTTGCTCTCAAACTCGCCGATCTTCTTCACCCTTCTGCTCATCCTGAGGCTCGTACCATGTCTGCCATTCTCCTTCGTCGTCAACTCATTCGTGATGATTCTTATCTCTGGCCTCGTCTATCTCCTTC…
Novel_G000239	Novel_T006177	CTTTGCATCACAACAATTGGTCAAATTTTCTGCAATTAGTTTTTTTGGGATGGGGTTCACTTTTCACCGTCCCTAAGCTGTTTCTACTTCGCTTTTGTCTGATGATGTCTCTTATAAAACATCAATGTGTGATAGCAGAAGGAAATTGTTAGCAGCCGGTCTTTTTTGCTGTCCAGACATATGGACGTGTTTTCTCCATTATTTTTCCTGTTTAATTTTTTCTCGCTCTCATTATTTTTTCCATTTCATAGTCCTTGTAAATACTAAAATGTCTTCTGCAATGCAGATTGTTGATAGGCTTCATTGGTACATAGAGAAAGGCAATACAGTAAGTCCATTATGTTGATTTGTTTGATTTTTATTATATTGAGCAGAATTCGTTATTTATTTTTCTTAGTG…
Novel_G000240	Novel_T006185	TTCGCATCTAACTACTGGGTGGCCTCATTTTGAGTAATATTAAAGTTTTTTGCCTACAAAAGCCAAACGGTGATGCCCGAGACTTAGTTTTTTAGTTCTGTCCCCAAACGTCAAAAAAATGGCCAACGCGATGGCCAAGAAAGGAACGACCCAGCTTAGAAATGTGTCAAAATGGGTGTGATTTAGCTTCTGAGAGTGACTATGTTGATGGGTCGAAGAGTTCTTTATCACCTGAGAAGCTCTTGTACTCGCTGGAATATGCTGGAAATGGTTTGAAGGTGGAGAGGATGGCAGTGCCGCTGAGAGATATGGAAAACGAGGATTTGTTGGATTATTTGAATGTGTGCTATGATTTTATTGAGCGGGGTAGAAAGGAGGGATCTGTTCTGGTGCATTGCT…
Novel_G000241	Novel_T006294	TTTTTATAAGAAAAAAAAAAGGATTAAAAAAGCAACAAACAAACAAAGCCCACTTCCAAAAGTCAACTCCTCTTTCTCTCTCATCTTTCTCTCTCATTAAAAAAAATTTCTGAGCTATCAAATTTCTTCTTCTTTGGGTTTTCAGGCGCACTATCATCTCTCTCACTGAGAGAAACAGAGTATTATGCAATGATCAATCAAATCAAACAGTAAAGAAGATAAAATTCTCTTTCTTTCAAGCCTTCAAATTTTTTTTTCCTTTGTTCATATGGGTAATCGTATTGGGAAGATTGGCCACTGTTTCGCCGGCGCCGGCGATATCTCCCGGCGTTATGATCCTGCCGACATTATCTCCGACCCCCACGATGGGGGTTTCGGTCATTCCTTCTACTACTTACC…
Novel_G000242	Novel_T006373	CACCCTCTACCCTCGCCATTAGAAAAATGTCTCTCTTACGCACACAATCCCATTTAACAATCCCAGCTCCCCCGCCCTCCCCAATCCCAACCGGCACCGGATCCCGTTCCGCCGCCAACGAAACCTTCAAAACCTTCCTCGACAACTCCACTCACCTCCCCCAGCTCTCTTTGCCCGAATCCCGCTTCTTCTCCGCCCACAATCCTGCTCCCGCCGTCCTCGATTTCCAATCCTTAGTTTCTTCCGGTTGCGCTGACGTGGTCGCGCGGATGCTTCGCTCCGTTCATGAATTCGGGGCCTTTCGGATCGTTAATCATGGGATATCCGGGGAGGAGGTTTTGTCGGTGGTCAATCAAGCTAAATCTGTATCTGTATTGGAAGATAGTAATAAGGGAGTTG…
Novel_G000243	Novel_T006375	CCCACCACACCCCCACCAAGTATGTTCAAGGTCCACCGCCACCAGCATTTCCAGCCCACACGACTCTCGACAACAACATGGTGATCCTCTTAGCGGCTCTGCTCTATGCCCTCGTCGGCGCACTCGTCATGAACTCAATTCTCCGCTGCATATGGCGGCGGTGGTGGAGCGCCGCCGCGGCAAGAGTCGAGAGGCAGGAATTGGAAGAGATTCCGGTGGCGGTTTACGAAGGGGAAGGGAGAATGAAAATCAGAGGTACGGAATGTGCGATTTGTTTAGGTGAATTCGAAAGTGGTGAGGGTTTGAGGATTATGCCCAAATGTAACCATGGATTTCATGTTCACTGTATTGATGCTTGGTTAGTTTCCCATTCCTCTTGCCCTAATTGTCGCCATAGTC…
Novel_G000244	Novel_T006472	TCGGGGCGGACTTCATAGTACAAAGCGACTGCAGCGGGTAACCGCCGGTAATGTCTGTAATCGGATGGTATGGACCTCTAATTGATCTTTCCGAAGTTGCTCTTCACGTTGGCGATTTTGTTCAACTCCTCGTCTTCATTCATCGATCCACTCCTGTTGAGTACAAATTGACCAATGGCGGAGACCTCATAAGGACTGACATTAAGGTAGCTGATGATACACGGTCGTTTTTCTCTGTATCATTATGGCAGAAGAAAATGGCAGCCGCTGCAATTCCAGGCGATGTTGTATTGTTGCAGAATGTAAAACTAAGGAAATTCGGAGATTCAACTGAGGCAACAACTGTTCATTGTTCTTCCCTAGCCAGTATAATCCATCCTTATGAAACACTTGTCTCTG…
Novel_G000245	Novel_T006492	AACAAACTCTCTCTCCGTTGCCGTTGAGCTTCATCATAGAAACAGAAGGAGGCTGTTAGAGAGGGAGAGTCTTGGAATCAATGAAGAGGCAGAACAGTCAGTTATCGTCCACTTCCCGCCGAGATCCTCCACCGGAGAGTCTTCGAGCTAAAAGCATCGGTTGCATGTCCGGCATTATTCATCTTCTCTCCAAGTACCAGAACCGCCACAAGAAATCCCTCACATTCGGAAAGAGTAAACAAGAGAAGGATATTATCGTGTTTTCTTCTACTTCACAAAATTCCGATCATACCTCAGTTTCTGCCGTCAGTATTTCCCCGGCTACTCCACCGCCACAGAGACAACGAAGGTCACGAAGTGACAAAAACAGAGAAGGAAAAGGAACGGAGGTTGTTGATT…
Novel_G000246	Novel_T006514	TTTTAAGCTCTCTAAACTTTTCAATATACATTTTAATTTTTTTTTTAAAGTTTGGGAGTATTTTTGGCATAAACTAGAAAGATGATGAGCTTTTTTTGTTATAAAAATGTGTAAAACAAAAGATAGCATAAGATAGAAGTGAATTAGAAATTAAAAAAAAAAAGTAGGATTTTCATTGTATAATAGGTAATGATTAGATAGTTACATTCATCCAATGAATTATTTTTATTTTTTCGTTGTAAAAGATACTATTTTTCTTTTTTAATTAAAGTTGTTTAAAAACACAAATCCAATTATTAGTAATTATTGGGTCAATTCAGATAAAGATATCCACCAAATTCCAGCCATGTTCTTGTTTTGCTCCAAACATCACATTATCATTTCCATTTCCATTTCCAT…
Novel_G000247	Novel_T006521	TTCATACTTCCCTTAGTTGGAAATTAAAGGGAAAAAAAAGAGAAGAAATTAAGAAACGGAAGGTAGCTGAGAGTCAAAATCTGATTCGCAAATGTAAAGCCAGTTTTTTCTTTTTTTTAGTCCCCGAGGGTTCAAATTTTGCATGAAGAACGTTCTGTTCTTTGCGTTTCACGCTTTCTGTTCCTGCTTAATCCTCACTCAAACCACAATCACAACAATACATTACAGTAATCCTTAATCCGCCTCCAACCCTTTGCGCCTGATTTGGAGGGGGACGATCCAGCGGACTCTAAAAGCTTTGCGTTTTATCCACTTAATTGCTTCAAATTCAATTACACGAACCCATTGAATCTTTCGGTGTTATTGACAAGGTTTGAGTGGTGAAAATAACATCCACAC…
Novel_G000248	Novel_T006538	CTTTAGGTTGCCCACGGGTTTACCGCCAAGGAGAGCCATAGACCATCGCATTCTGACCGTGGCCGATCAGAAACCAATTAATGTAAGACCATATAAGTATGGCCATGTACAAAAGGAAGAGATTGAAAAATTGGTGTTAGAAATGTTACAAGCTGGGGTGATTCGTCCAAGCCGCAGCCCATATTCGAGCCCGGTCCTCTTAGTGAAGAAAAAAGATGGAGGGTGGAGATTTTGTGTAGATTACAGGAAACTCAATCAAGTAACGGTGGCTGATAAATTTCCAATTCCCGTGATCGAAGAACTCTTAGATGAACTTCATGGTGCGACAGTTTTCTCAAAGTTAGACCTTAAATCTGGATACCACCAGATTAGGATGAGGGAGGAAGATGTGGAGAAAAC…
Novel_G000249	Novel_T006558	TTTTACAAGTATCTTGGCTCGATTGTCGTTGGAGCATGGATTCATCTGATTTCAAACAAGATATTTGGTACAATGCAAGCGTTGAAGTAATGTTGACAAGCAACGCCTCTGGATGGAATGTTCCACTATACCTTGAAATCGAGTTGCCTGGGAGTGAGCAACAGTCTCAAATAGTATTGGAAGGCAGACAACCAAATGTGTGGTTCAAGATTTCATTAGGTAAATTCATACTAAGTGGTTCTCTGACTAGTGGAACAATCCGATTCGGCTTCTACAACCATGAAGGGAATTGGAAAAGAGGCTTGAACATAAGAGCCCTTGCCATTCAAGCACAAAAATGAGTTTGAAATGATATGTTCAAGAATGAATATAAAGTAATATAATAAAACCCTAAATAAT…
Novel_G000250	Novel_T006584	AAAACAACGAAGTTAACCTAACAGAGAGAGAAACCCTAGAAGTGCTCTAAATCATCTTGACCCTCAAATCCCCATTATAAAAGCTTCCTCTTCTAATATCAGCCACCTTCTTCTTTGAACCGCAGCTCCATCTTCCTCACTTCAACCTCCAAGTCTAAGTCGTTTTTCAAAACCCTAGACTGCGACAGCCATGGTGAAGGGAAGGCAGGGAGAACGAATCAGACTCTACGTCAGAGGAACGGTTCTTGGATACAAGAGGTCGAAATCTAATCAGTATCCAAGAACATCCCTGATTCAAATTGAAGGAGTGAACACCAGGGAAGAGGTCGCGTGGTATGCTGGAAAGCGCTTGGCATACATTTACAAGGCCAAAGTGAAGCAAAATGGAACTCACTACCG…
Novel_G000251	Novel_T006589	GCAAAAAAATGATTCTTTTCTTTTCGTGTCTAGAACGGCGGCTAGAAGTGGCTGAGTGCCATTTGCCGACGACGAAGGTGTTTGGTGAGCCACTCAATGGTTTAAAACCACACTGAATTTTCTAAAATCTCCATTCATTTCGAGTTTTGGCCACCTTTTGAAGTAGAAACAATACGGACAGTAGAGGCATAGCTTAAAACATGGAATCTGGATCATGGCACGTTGAGAAAAGATCTTCTCTTAGAAATGACTCTTTTACAGGAGAGGACAATGTACCGGAAACTGGCTGTCTCTCCATCGTTGTGCTTGGAGCATCTGGAGATCTTGCTAAGAAGAAAACTTTTCCAGCTCTCTTCCACCTTTTTGTCCAGGGATTCCTACAATCAAATGAAGTTCACA…
Novel_G000252	Novel_T006614	CAACAATGGAGTGTGAAAGAGAAACATTGAGACCTTCCCCCTTCCCTTCAAAGCAAGGAACGAACCCCATCTTCCTCACACTTCCAAACCCTTTTTCCCCCAACATTCAATCCCCCATTTCTCCATTAATCTTCTTCTTCCTCTCCCCATTCCTACATTAATCCTCTTCTTCTTTCTAACCCAAATTTTGCAAAATGAGTCTCAAGCTTCTCACCATAATCTCCTTCCTTCTAACATCCACACTCCTCTCTTTTCTCTTCATCCAAACCAAATTAACCAAACCCATTTCCGCCATTAAACCCCTAATCAACTCCATCTACTTCCCCGACTCAAATCTCTCTTATCCCCTCTCTTTCGCCTACTTAATCTCCGCCTCCGCCGGCGACGCTCCCCGTCTCA…
Novel_G000253	Novel_T006615	CAACAATGGAGTGTGAAAGAGAAACATTGAGACCTTCCCCCTTCCCTTCAAAGCAAGGAACGAACCCCATCTTCCTCACACTTCCAAACCCTTTTTCCCCCAACATTCAATCCCCCATTTCTCCATTAATCTTCTTCTTCCTCTCCCCATTCCTACATTAATCCTCTTCTTCTTTCTAACCCAAATTTTGCAAAATGAGTCTCAAGCTTCTCACCATAATCTCCTTCCTTCTAACATCCACACTCCTCTCTTTTCTCTTCATCCAAACCAAATTAACCAAACCCATTTCCGCCATTAAACCCCTAATCAACTCCATCTACTTCCCCGACTCAAATCTCTCTTATCCCCTCTCTTTCGCCTACTTAATCTCCGCCTCCGCCGGCGACGCTCCCCGTCTCA…
Novel_G000254	Novel_T006674	AAAACCCCAACACCTTCGCCAAATTACTTCACAAAATCTCAAATAGAAAGAAGAAAAAGATGGGGATGAAGCTCTCCATTTCCCTTCTCCTCTTCCTCTTCTTCAACCTCTCTTCTCTTCTCAATGCAAACACTCTTGCATGTGATTGTGACAAGTCCCCATCTTACCCTCCTTCCCCTAAACCCAAACATCCGCCGCATTATCCCCCTAAACCCCCCAAATCTCCTCCTCCCTACAAACCCCCCACTGTCAACCCACCTCCCCCATACATCCCAAAACCACCTCCTCCCTACGTCCCAAAGCCCCCCACCGTCAAACCCCCTCCTCCTTACGTCCAACCCCCCGTAGCTAAACCCCCACCACCACCGTCCCCTCCCCCTCCAGTCGTATACCCGTCAC…
Novel_G000255	Novel_T006748	GAAAGGGGTCTCATAAAACCCAATTCTTGGATAACCCCATCATCCTTTTTTTTCTTTTTTCTTTTCACATCAATCCCACCTCTATCCCTTCTCTCTGCTTCCATGTCTAGCGGAACAGTCCGTCTGGTGAAGAAATTGAAGAAATTCGCTGACTTTCACTACAAGGTTTTCACTAGACGATATGGGCAGCAAGTCATTGACATCCTCGACCTTCCTCTTAAGGTGGTTTTATCCCCTTTCACCCTTGTTTTCGACATTGCCGGCTCAGCCCCTCGTGGCTTTGGTGTCCCCGAGCTAATTTCCAAGCTCTCATATGCTTCAATCTTTGCTATTGCTACATTTGGGACTTATGATATTGCGCTAGACCTAGGAAGGAAAGTTATATGTCAAAGGCAGTGT…
Novel_G000256	Novel_T006767	ATGGAATCTCGCATTGGAAACGCATTATGAAAGTGAAGAACTTCATTTCTTCATCACTAAGTCACCCCCACGTACTCAAAACTAAACCCTAAACCACTCATCATATCCTTCCTTCAAAGTATAAATATCGCCATATTCAACACTCAATTCCTCCCATCCTTAACCTCTTATCCTACAGAATTAATCAATATGGATATCAAAGAATCTGCCGTCCACCAAACCCACGCCGGATTACGCCTTCTGAAGCAGCTGCTGGAGACCCAACAATTTAAAGCTAAGAACCTCGTATTCTCCCCGTTCTCCATCTACACCATGCTCACTCTTCTCGCTAATGGAGCTTCACCCGACTCCCAAATGATCCAACATTTGCTTTCCTTCCTCAAATTTCAATCCCTCCAA…
Novel_G000257	Novel_T006812	CTCTAATTAAAAATTAAAACGTTAAATTTTAGATCAATAAGTTATTAATAATTAATTCAATTAGATATAATTCTAACTCATCTTAATTATCCTAATTAAAGGAAAGTATCATTACTATAAACACAGGTTATTATAATTCTATACGATTTTTTTCAGAAAAAATACGAAATGGGAAAATAGGTGCATCAGAATATCTCCATCAGGTGAAAACCTTCGTAGCACCATCATCATTCCAATAGGTACACAAGCAAAAACAAGGGGTAGAGGGAAGCTCAAAGGAGACCCAAAGTTAGGAACCAATCTCGAAAAGAAGATTATACAAAAACATTTAAATTAAGAGCAATAGAGTTGGTCGAATAGTTTGAGAAAAGAGTGGATATGCTAGTAGAGAGCTTTTAT…
Novel_G000258	Novel_T006906	TCGATCTTGATTTTCATAGACTGCACGATTCTCGAGGAGGAGAAGAAGCTAAGAAAAGTACAAACTCGCATTTGCACCGGTTGACTTCAATTAGTTCGTGTTCTGCACTCTACACGCTCACCAATGGCGTTCTCTGAGTTTAATCCCGGTTTGTGGGCATTGACGATATCTCCGAGCTCTTTGCTTCTGATTCACGCGACCCACTAATTAACTTTTAACATATTTGGTGTAAATCCAGTGGATTTTAACAAAGCTAAATTAATGGACAGTAAGCTGTGCAATATTATCTGCCGGATTAAACTTGATGACAGTGGACAAAAGAGCCAAAGATTAGAAGGAGAAGGTTGAGGGTACATTTGGTCTACAATCCACATGAGAGTGATGTGGATTGACATCTAG…
Novel_G000259	Novel_T006907	CGATTCTCGAGGAGGAGAAGAAGCTAAGAAAAGTACAAACTCGCATTTGCACCGGTTGACTTCAATTAGTTCGTGTTCTGCACTCTACACGCTCACCAATGGCGTTCTCTGAGTTTAATCCCGGTTTGTGGGCATTGACGATATCTCCGAGCTCTTTGCTTCTGATTCACGCGACCCACTAATTAACTTTTAACATATTTGGTGTAAATCCAGTGGATTTTAACAAAGTGAGTTCAGATTTCCTCAATGTATATGAAAATTTATTGGCATTTGTTGGGTTTGGATTTGTTCTTAAGATTAGACTTCGAAATGAAGTAAAGTATGTCGGAAAGGGGTTTTGTAAGAAGATTTAAGTCTTGTGCCCATAAGGTGTTCGAGATATTATCTGAGAGAACTTGT…
Novel_G000260	Novel_T006908	TCTCGAGGAGGAGAAGAAGCTAAGAAAAGTACAAACTCGCATTTGCACCGGTTGACTTCAATTAGTTCGTGTTCTGCACTCTACACGCTCACCAATGGCGTTCTCTGAGTTTAATCCCGGTTTGTGGGCATTGACGATATCTCCGAGCTCTTTGCTTCTGATTCACGCGACCCACTAATTAACTTTTAACATATTTGGTGTAAATCCAGTGGATTTTAACAAAGTGAGTTCAGATTTCCTCAATGTATATGAAAATTTATTGGCATTTGTTGGGTTTGGATTTGTTCTTAAGATTAGACTTCGAAATGAAGTAAAGTATGTCGGAAAGGGGTTTTGTAAGAAGATTTAAGTCTTGTGCCCATAAGGTGTTCGAGATATTATCTGAGAGAACTTGTACTG…
Novel_G000261	Novel_T007006	TCTCTTTATACCTTCATTTCATCTAACCTACTTTCTCAAGAAAACACTCCTCCTCTCGCAAAAAAGACCGTCCGCGTGCGCCTCCTTTCTAACGAAGAAGATCGCCGTCGTCACAGTCTCGTCGTCCGCTCTGTCCGCCGTCACACCCTGCTAGTTCGCCGCACAATTTGCTCGGCACCCGCTGTCAGATTCAAGCATCTCTTTCTCTCTGCTACTCAGAGGTACTGAGAGATACACCCTTCTCCTTTCCCTTTCAAGTGAGATAAAATGGGAGAGAGGAAGGTGCTTAACAAATACTACCCACCGGATTTTGATCCGTCAAAGCTACCAAGGGTTCGTAGACCCAAAAACCAGCAAATGAAGGTTCGTATGATGCTTCCTATGAGCATCCGGTGCAAT…
Novel_G000262	Novel_T007032	GTTACCTACCAATCAATTTAATAAGAGAGTTTCTAAAAAAATGGCTCTTGTTGGAAAGCTTGTGAATCAAATAGAAATAAAGACATCAGCAGAAAAGTACTACAAACTCTTCAAACATCATATTCATCATCTTCCCGATATCACTCCTATCTTTCAACAGGTAACAGTTCATGATGGTGATTGGGACAGTCACGGCCATGGCTCCATCAAAGTTTGGAATTACACCGTTGACGGCAAAGCTGAGGTTTTCAAGGAACGAGTGGTATATGATGATAAAAACTTTGCAGTAACAGTGGTTGGGATAGAAGGAGATGTCTTCAACCATTACAAATCTTTTCAGGGTACATATCAAGTTGTACCCAAGGATTCTAAGCATTGCTTCGCTGTTTTGACCGTGGA…
Novel_G000263	Novel_T007033	TTTGCTACTGCCTGCATTACATTATCGAGTATACATCGTCAAAAGAATAATCTGAGGAAGATGTTTACTTCAGATGAATGGAAGAATAGCAAATGGAGTAAGGAGCAACAAGCGAAACGAGTAGTTCAGACTATTTTGTTGGCTAGTTTTTGGACTACAATTGTTTTCACTCTTAAAGTATCTGGCCCACTAGTCCGAGTTCTTAGATTGGTTGATGGCGAGAAGAAGCCACCTAGGATATATTTATGAGGCCATGGATAGAGCTAAGGAAGCTATTGCTAAATCCTTTAATAATAATGAAGAAAAATACAAGGACATTTTCACCATAATTGATAAAAGATGGGAGCTTCAGTTGCATCGTCCCCTGCATGCAGCGGGGTATTATTTAAACCTGTCATT…
Novel_G000264	Novel_T007041	GTATATATATAATATATCTCAAGGCTGCTTTAAAAGGGAGCAAAACATTTTCAAAACTGTTAATTGTGGGAGTGTTTTGTAAAGCAATTCTTTAAACATGGCTCTTGTTGGGAAGCTTCAGAGTGAAGTAGAAATAAGCATACCTCCCCATATATTTTACAAACTCTTTAAAGAACAAATTGCTAACATTACAAATATTTCTCCAAAGTTAATCCAAAAAGTTGAACATCATGATGGAGACTGGAGCAAACATGGTCACGGTTCCATCAAAGTTTGGAATTACACTATCGATGGTAAAGCCGAAGTTTTGAAAGAACGCGTGGAATTCGATGACAAAAATCTTGTGGTAAGAATGGTTGGATTGGAAGGAGATGTGTTTAAGCATTACAAAACCTTCAT…
Novel_G000265	Novel_T007042	GTGTAAACCAATTTTGTGATCATGGCTCTGGCTGGGAAGCTTGTGAGTGAAGTAGAAATAAACACACCTCCCCATAGATTTTACAAACTCTTTAAAGAAGAAATTAATAGCATTCCAAATATTTCTCCAAACTTAATACAAAAAATTCAAATTCATGATGGGGATTGGAGCAAACATGGTCATGGTTCCGTCAAGGTTTGGAATTACACTATTGATAATAGGGCTGAAGTTATCAAAGAGCGAGTTGAATTTGATGACAAAAAACTTGTGGTAAGAGTAGTTGGATTGGAAGGAGATGTGTTTAAGCATTACAAAACCTTCACTGGAACGTATCAAGTTGTTTCTAAAGGACCCAATCGTAGCGCCATAATATTTACCTTGGAATATGAGAAACTTCAT…
Novel_G000266	Novel_T007045	GGGCACTTTCAATAAAGGAATCCCTAGTTAGAAACCATGTCTCTTGTTGGAAAGTTTGTGAGTGAATTAGAAATAAATGCACCTGCTGAGAAGTATTATGAAATCTTCAAAGATAAAGTTGCTCATATTCCCAATATTTCCCCAACCCTCTTCCAAAATGTTGAAGTTCATGAAGGTGATTGGGACACCCATGGCCATGGCTCCATCAAAGTTTGGAATTACACTCTAGAGGGGAAAGCTGAAGTATTCAAAGAACAAGTGGAATTCGATGACGAGAATTTTGCAGTAACTTTGATTGGATTGGAAGGAGATGTGTTCGATCACTACAAATCTTTCCAGGGAACATATAAAGTTGTACCAAAAGGTCCGGAGCACAGTTTGGCCGTTTTGACTTTGCAA…
Novel_G000267	Novel_T007047	ATATTATTGAGTGAGTGAGCCATTTTTTCTCTATCTAGAGATAGAAGGTTTTGAATCATGTCTCTAATTGGAAAGCTTGTGAGTGAATTAGAGATCAATGCACCTGCTGAGAAATTTTACAAAATATTCAAACATCAATGTTTTCATGTTCCCAATATAACCCCCAAATTCATTCAACAAGTTGAAATCCATGATGCTAACTGGGATGACCATGACCATGGCTCTATCAAGACTTGGTATTACACTGTTGATGGCAAGGCAGAAGTTTTCAAGGAACAGGTCGAGTTTCACGATGATAAATTGTTGATAATCTTGGTTGGGCTGGAAGGAGATGTGTTCAACCATTATAAAAGCTTTAAGCCATCTTACCAAGTTGTGCCCAAGGGTCCTAACCATTGC…
Novel_G000268	Novel_T007048	CGAATGGAAGGAACTGAGAAGGAGTTGCTGAGCATGAAAGAAATGCTACTGGAAATGAAGAAATCTATGGAAAGACTGACAGAGGAACTAAGAGAGAATCATAGCTATAAGAAAAGAGATGAATCCGGAACATCTGATGGATCCAGCATGAAGTTGAAAGGAAAAGTAGAAGAATCGGAAGTCTGTAATGAGGTAAATGGAAGCAATGTGGATCGAAGTAAGTACGCAAAGTTAGAAATGCCTATGTTCTTAGGTGAAAATCCAGAATCCTGGGTATATAGAGCAGAACATTTCTTTGAGATGAACAACCTGCCAGAAAACGAGAAGATCAGAGTGGCGGTGGTCAGTTTTGGGCAAGAAAGGTCTACGATGACAGTTATTTTAATAGGAAGAAAGTAG…
Novel_G000269	Novel_T007059	AAATAATCCAACCTCAACCCATTCTTCTCCATTTCCATGAACTTTCTTCTCAACGACGGATACCCACGGCGACATCAAATCTAAACTTTTGGAAGACAACAACCCACACTCTTTTTAAAGATTTTGAAGACAGGTTAGTGTTTAATACTTTTCACTTTTGTGTCTTTCCCTTTTCTTATTTTAATTAGTAGGGTGTAAGAATGGAACAAAGCCATTTGTGAATAGTTTCTCACATTTTCATTCACCCCCTCCCTCATATATATGTGACCTATTTCTCTGATTGTTTCCTCATAAAATCTGAATAACCATATTGTTTACGGTAGATCAAGGAATCTTTGAAAGTTAGACAATGAGCGTTTAGTGGGGAAAAATTTTGAGTACAGAAGGGGTTTGTGAAAA…
Novel_G000270	Novel_T007060	ATCCAACCTCAACCCATTCTTCTCCATTTCCATGAACTTTCTTCTCAACGACGGATACCCACGGCGACATCAAATCTAAACTTTTGGAAGACAACAACCCACACTCTTTTTAAAGATTTTGAAGACAGGTTAGTGTTTAATACTTTTCACTTTTGTGTCTTTCCCTTTTCTTATTTTAATTAGTAGGGTGTAAGAATGGAACAAAGCCATTTGTGAATAGTTTCTCACATTTTCATTCACCCCCTCCCTCATATATATGTGACCTATTTCTCTGATTGTTTCCTCATAAAATCTGAATAACCATATTGTTTACGGTAGATCAAGGAATCTTTGAAAGTTAGACAATGAGCGTTTAGTGGGGAAAAATTTTGAGTACAGAAGGGGTTTGTGAAAATGTCT…
Novel_G000271	Novel_T007081	AAAGAACAATGTTGGAAGTTACATGGTCGTCCCCCAGGAAGTAAGAAACGCCCTTCCAACGACAAACAGAACACAGGGCGGGCGTATGTGAGTGAGTCTGCTGAACCTCCTCAACAATCCGATCCACACAAAAACCAAACTGATCTCAGTCTTGCCACTTTAGGTGCCATTGTCCAATCAGGTATACCTCATTCCTTCGGTCTTGTTAGTATTGATGGGAAGAACCCCTGGATTCTGGATTCTGGTGCCACAGATCATTTGACTGGGTCCTCTGAACATTTTGTATCTTACATTCCTTGTGCTGGGAACGAGACAATTAGAATTGCAGATGGCTCCTTGGCCCCCGTTGCTGGAAAGGGGAAGATTTCTCCTTGTGCAGGGCTCTCCTTACATAATGTT…
Novel_G000272	Novel_T007087	GGAAACTTTACAAACCCATCAAACCCAAAAGTGAAGGTTTGGAGATATACTCCAACCTTTTGGTAATTTAACCAGTTCTATAAATAGCTTAATCCTCGCTTTCCATCTGAATTTTGTGCAAAGGAAGAGGAACACATCAACACACCAAGAAAACACTAAAGTTAAAGCAATAGAAATGGGTGAAAACAACAATGATCAAACTCCCACCATTCCTCTCCTCACTCCTTACAAGATGGGGAAGTTTAATCTTTCTCACAGAATTGTATTGGCTCCATTGACAAGGCACAGATCTTACAACAATGTTCCTCAGGAACATGCAATCTTGTATTACTCCCAGAGAACCAGTAAAGGGGGTTTCTTAATAGCTGAGGCGACTGGGGTTTCTGAAAGTGCCCAAGG…
Novel_G000273	Novel_T007116	TATCAATCTCATAAGTCAAAACTAAAGCTAACAAATTATTTAGGTTGATTTGGCTGGGTCGTATCTTTTTTCTAACTTTTATTTCCATCACCTCTTTAACATCTAACTTTTTTCTTTGTCGAAAAAGCTGTTCCTTTTGTTCATCTTGTCAATTGATGAACCTGCAGCTGTCAGTTTAATGGAAATTATAGGAAAAACTGGGTTACTGTTTGGTCTGGCTTTTCTTTGGTTATGGGCTTTTTCATGTGAGGCTTCAACAAGCAAAGATCTTACTGCTGAAGTTCAAGTTTTGATGGGGATCAAAGCTGGTTTGAAGGATCCTCATTCTGTACTGAGTTGGGATGAAAATGCTGTGGATGCATGTACTTGGAATTTCATCACTTGCTCTCCTGATAAACT…
Novel_G000274	Novel_T007195	ATAATCCTCATCTCCATTCATTTATGTCTCTTTCTCTTTTCTCTCTCCTCTTAATTTTCCCGTTTTCTCTCTCTCTCTCCTCTCTCTTCAAAAAAAATTCACAAAAAAGAAAAAACAACAAACAACACTGTTAGTGCTCTGCAGCGCTGTTGTGATGAGGATGATTATACCTTCTGCTTCTTCTTCTTCTTCTACTACTACTTCTTCTTCATCAGCTTCTTCTTCAACTTTTTTAATCCCTTAAATTTCCTTTTTTTTTTATATAATAAAAAAACATCAAAATCCTCCATAGCACTAACTCGTAGGAATTCACTTTCTGACTTCCATTTTTCTTCCAGCTGTCTTCTCCTTCTCTCTCTCTTCCTTTTTAATTATGGCTTCCTTTTAAATTCCTTCCTC…
Novel_G000275	Novel_T007233	CCTCTCTTTCCATCTTCCAACTTCCCTTCTGATCTCAATAATTAACATAAACTCCAAATCTCTTCATTAAATTTCATCTCTTTTTCTTGTACTTGTTTTTTACGGCTCCTATATTCTAATTCTTTCAAAACCCACAACTGATTTCCAAGTTAAAAATGATGAAGGTCGAATTAAACGTTGAAATGAGGGATTTAAAGACAAAGAAAAAGGTGTTGGGTGCTATTTCTGGCCTTTTAGGTAACTTCCACAAACTATATTATATAAAACTCTTCATCTAAATTTTTCTGACGTAATAAACAATTCTGTTATATCTTAAAAAACCAATAAAGCGGGGAAAAAAATTAAATTAACAAAATGTCATGAATGTGAAGAGAATACAAATAATAAACATATTAACTT…
Novel_G000276	Novel_T007234	CCTCTCTTTCCATCTTCCAACTTCCCTTCTGATCTCAATAATTAACATAAACTCCAAATCTCTTCATTAAATTTCATCTCTTTTTCTTGTACTTGTTTTTTACGGCTCCTATATTCTAATTCTTTCAAAACCCACAACTGATTTCCAAGTTAAAAATGATGAAGGTCGAATTAAACGTTGAAATGAGGGATTTAAAGACAAAGAAAAAGGTGTTGGGTGCTATTTCTGGCCTTTTAGGTGTTGTAGCAATGGCAGCAGAAGAAAACAAAATCACAGTGATTGGAACTGCAGATCCAATTAAGATTTGTAAAAAAGTAAGAAAGGTTTGGCCATGTGCTAATATTATTAGTGTTGGACAAGAGAAAGAAGCTGCAAAGAAAGAAGTCGCAAAGAAAGAAG…
Novel_G000277	Novel_T007331	ATTTTCCACCCCGGGAGAATGATCAAGATCCATCTCCACGAAACAAATAATAGTAGTTGTAAGGAATTTTTGGGGACGGAGGGGAAATTTTGATTGTAATATTTTAATCTCTCAACAACCAATGTTGTGCGAGGGAAATCCATAATATTACCTATCTTCTTCTTTCTGGAAATTCTTGTTCCACTCTGCAACTTATGGGGTTTTCCTCACTGCCCATCTTCTCCTTCTTCGTTTTCGTCATCATAATCATCCCAATTTCTCATTCCTTACCCTTCATTGTACTCCATGGCATTGGAGATAAATGTTCAAATAAAGGCATGAAGAAATTTACTAAGTACTTGAGTGATAATTCTGGTGCTAAAGGATACTGCATAGAAATTGGCAATGGGGGGTGGGATT…
Novel_G000278	Novel_T007348	GTTCCCGTCAGAAATGTTGTTCTTAAACGGATGTACTATGTAATTGCCTTACAAACCATGTGACCATTTTCTTTACTGGATTCTATAATTTTGCAGGTTTCTCAACAGAGCTTTGATTGTACCTAATAGTTTGAAAGAAGACGGTCGTGCATGTAGCATCAATGAAGTTGAGGAAGCAAAAGCAGTACTGAGGCTCGTTCCAATTTGGGTGACATGCTTAGGATATGCTATTGTATTCTCCCAGTCGTCAACATTCTTTATAAAACAAGGAGTCACAATGGACAGATCAATAGCAGGTGGATTTAAAATACCAGCTGCTTCACTTCAATCTCTTATCGGTCTCGGTATTATGATTTCCCTCTTGATATATGATTGCATACTCATTCCAACTGCAAGAAA…
Novel_G000279	Novel_T007398	GTTGATGAAATGTTGCTTCAAATTTAGAGAGTATCAACATGGATTCGAGATATTCTTTGAAATGAAAAACAAGGGCCTTGCTTTTAATGGTTTTGGTTACTACACTGCTATTGGTGCTTTACTTCGGTTAGGTAGGCTTGAAGAGGCAAAATTTTTTATGGTAGAGATGATAAAGAATGGAGTGGTATTTAATTTAGTTTTTTATAACACAGTTGTTAATTTGTACTGTAAACATGGTAAATTGGAGGCTGCACATAAGATGTTGGATAAGATAGAGTCACGGGGATTACAATGCAACGATTACACACATGCTATAATCACTGATGGGTTATGTAAGGTTGGCAATTTTGAGGGGGCTCGACGACATTTGAATTATATCTATCCAACAGGTTTTACTAA…
Novel_G000280	Novel_T007399	CGTTGATGAAATGTTGCTTCAAATTTAGAGAGTATCAACATGGATTCGAGATATTCTTTGAAATGAAAAACAAGGGCCTTGCTTTTAATGGTTTTGGTTACTACACTGCTATTGGTGCTTTACTTCGGTTAGGTAGGCTTGAAGAGGCAAAATTTTTTATGGTAGAGATGATAAAGAATGGAGTGGTATTTAATTTAGTTTTTTATAACACAGTTGTTAATTTGTACTGTAAACATGGTAAATTGGAGGCTGCACATAAGATGTTGGATAAGATAGAGTCACGGGGATTACAATGCAACGATTACACACATGCTATAATCACTGATGGGTTATGTAAGGTTGGCAATTTTGAGGGGGCTCGACGACATTTGAATTATATCTATCCAACAGGTTTTACTA…
Novel_G000281	Novel_T007400	CGTTGATGAAATGTTGCTTCAAATTTAGAGAGTATCAACATGGATTCGAGATATTCTTTGAAATGAAAAACAAGGGCCTTGCTTTTAATGGTTTTGGTTACTACACTGCTATTGGTGCTTTACTTCGGTTAGGTAGGCTTGAAGAGGCAAAATTTTTTATGGTAGAGATGATAAAGAATGGAGTGGTATTTAATTTAGTTTTTTATAACACAGTTGTTAATTTGTACTGTAAACATGGTAAATTGGAGGCTGCACATAAGATGTTGGATAAGATAGAGTCACGGGGATTACAATGCAACGATTACACACATGCTATAATCACTGATGGGTTATGTAAGGTTGGCAATTTTGAGGGGGCTCGACGACATTTGAATTATATCTATCCAACAGGTTTTACTA…
Novel_G000282	Novel_T007401	CGTTGATGAAATGTTGCTTCAAATTTAGAGAGTATCAACATGGATTCGAGATATTCTTTGAAATGAAAAACAAGGGCCTTGCTTTTAATGGTTTTGGTTACTACACTGCTATTGGTGCTTTACTTCGGTTAGGTAGGCTTGAAGAGGCAAAATTTTTTATGGTAGAGATGATAAAGAATGGAGTGGTATTTAATTTAGTTTTTTATAACACAGTTGTTAATTTGTACTGTAAACATGGTAAATTGGAGGCTGCACATAAGATGTTGGATAAGATAGAGTCACGGGGATTACAATGCAACGATTACACACATGCTATAATCACTGATGGGTTATGTAAGGTTGGCAATTTTGAGGGGGCTCGACGACATTTGAATTATATCTATCCAACAGGTTTTACTA…
Novel_G000283	Novel_T007486	CCTTTCTTCATTTTCTTCCTTCCAAATCCCAAAATGTCCAAAATTTCCTCCACATTTCTTCTACATTTCATCCATAAACGTTTTCTCACTGCCATTTCTACTCCTACATTGCCTTTACCCTCTGTTTCTACCATCCAATTCCTCACTAATTCATGTGCCCTTTCTTCAGGATCTCCTACCTCCGCCGGTCGAAAGCTCCAATTCGATGAAAAAAACATCCAGCAGTACGAAGCCATTATCGGTTTCTTCAAATCTCATGGATTCGAGAATTCACAGATCGCCAATTTGGTCTCGAGGCACCCTTCTATACTTCAATCCAGAGTATCCACCAATCTGAACCCTAAATTTGAGTTCCTCCAGGAAATGGGGTTCGTCGGTCCTTTACTTTCTAAGCTAATT…
Novel_G000284	Novel_T007487	GGGATGTTCGCTTCGTGGAGCTCAAAACCCTAAACCCTTTCTTCATTTTCTTCATTTCAAATCTCAAAATGTCCAAAATTTCCTCCACATTTCTTCTACATTTCATCTTTAAACGACTTCTCAATACCATTTCTACTTCTACATTGCCTTTACCCTCCGTTTCTACCATCCAATTCCTCACTAATTCATGTGCCCTTTCTTCGGGATCTACTACCTCCGCCGGTCGAAAGCTCCAATTCGATGAAAAAAACATCCAGCAGTACGAAGCCATTATCGGTTTCTTGAAATCACATGGGTTCGAGAATCCACAGATCGCGAATTTGGTCTCGAGGCGACCTTCGATCCTTCAATCCAGAGTATCCACCAATCTGAACCCTAAATTTGGGTTCCTCCAGGAAA…
Novel_G000285	Novel_T007527	CATAGATGGAGTAAAAATATCATATGTGTCTTGGAACAACTTGTCCCGTCAAAGCTTTCAGGTAAGGAATATATCTCTAGTAATTAGGATATTCAAAGGTCTGCTTCTCTATGATCCTATTCTGTGTACATTAAATAATTTTATTACTGGCTCATGCCCCTGAAGGCAATAAAGAGACCTGTTAGTTACCATTTCAGAATTCTTCTTACTCAACATTTGCAACTTCTTGTCGCCCATACTTGATGTAATTGATGCTTCAACTTCACTTTCTGTCCAAGCTTATTCAAATTTTGAGATAGCCTTCAATGGAGGAGGAAGCATCGAATTCAAAGGGACTCTTGAGCAAAATTGGTACTCTAAAATAAGACTTTTTCAAGGAGAGGTCACTTTAGGGGATGT…
Novel_G000286	Novel_T007528	GTTAAACCCACCACGATTTAGTGCTTAGAGAACCCCTCGCCCCTTTCTTCACTTCTTCTGTCGCCGTGCTTAGACAACCCCTTGCCTTTTCTTCAGTTATTCCCTCGCCGTCGAACCAAAAATCCTTTAAGAACCCTCGCCGGCGCCGTCGATTCTTTTCTCAATAACATCCAACTCGTCGACGCTTCCGGGGCGGAGTTCGTTTTGGAGGTTAGCTAAATGGCTACTGCTGGAGATATAACTGCTGCCGACTTCCTGCAAGGTGGGCGTAGGCAGAGTTTGTTTCTGCAGAGCTATTCTCATTGTAAACGACGTGGGTTGTGGGGGACACTGCGTACTTCAGCTGTGGGATCAGTTAATTCAAGCAGAAGATATGTTCCTTTGAGATGTCGTGCATCC…
Novel_G000287	Novel_T007529	ATCTCTTTCTTCTTCTTTCCTCTTCTTTCTTCTCCTTCGCCAAACCCCCATTTTCTCCATCCCTTACTTCTTCTTTCTTCATTCTTCTTCGTTCTTCCCTTTCCACTTTGATCGAGGGTCCACCAGCATCAACAATGGCAGTAACCGGAGATAGAAGTCACCATCAAAACCTCAGGATCTTCTTCCTTTTACACAATGGAATAACTTAAAGCAAACAAAGGAATCAACGACTCTTCATTTCCTTAATCTGTCTCTGCCGACGGCCTCTTTTATAAATCAGGAAACCTTCCTGATTTGAGCTAATAACAGCAGTGCTGAAAAGTTAGATCCTCATCGAATCTGCTTTACATGGAGATTTCTAACGTTCCTTTATTATCTGTTGAAAATTTTGTCTCTATC…
Novel_G000288	Novel_T007555	TTTGGATTAAAATTTTGCTAGAAAGAAAAGAAAAAGGAAATTTGTTTCATCTTCTTCTCCATCAAGCCCACGCCTCCCTCCTCTCCACTTTGCCGCCGCTCACCGCGGTAAGTTTGGGCGAGTGTTTTTGGATCTTTATGCTTACGGTTGGTTTTGAAATACCCATTAAAGGTTGGGTGCAATTGGAACCCTCCTGATTCATTTCTTGATTTTCCATCAAGTTTGAGATTTAGTTCAACATCCAATTTGGGAAAATGACGGCACGTAAAGTTGCAAGTAGGGGTGGTCAAGGAGGCAGAGAAGCAGGGCACAATCAAGTTGATGAACAACCTGCTGAACAAGTTACCAATCCTGTTGCACCCGTTTCCCAAGCTGATCTTACTGCCATGTCGACTCGGC…
Novel_G000289	Novel_T007556	TTTGGATTAAAATTTTGCTAGAAAGAAAAGAAAAAGGAAATTTGTTTCATCTTCTTCTCCATCAAGCCCACGCCTCCCTCCTCTCCACTTTGCCGCCGCTCACCGCGGTGCAATTGGAACCCTCCTGATTCATTTCTTGATTTTCCATCAAGTTTGAGATTTAGTTCAACATCCAATTTGGGAAAATGACGGCACGTAAAGTTGCAAGTAGGGGTGGTCAAGGAGGCAGAGAAGCAGGGCACAATCAAGTTGATGAACAACCTGCTGAACAAGTTACCAATCCTGTTGCACCCGTTTCCCAAGCTGATCTTACTGCCATGTCGACTCGGCTAGAGCAGATGTTTAAAGACACCGTGACTAAAGTGTTGGCACAACATCAGCTAGCCCAAGCAGCCCCTA…
Novel_G000290	Novel_T007557	GTTTCATCTTCTTCTCCATCAAGCCCACGCCTCCCTCCTCTCCACTTTGCCGCCGCTCACCGCGGTGCAATTGGAACCCTCCTGATTCATTTCTTGATTTTCCATCAAGTTTGAGATTTAGTTCAACATCCAATTTGGATTGAATTTGGGAATTAGTTTGCAATAGGAAATTTTTATTAAGTTAAGGAAAATGACGGCACGTAAAGTTGCAAGTAGGGGTGGTCAAGGAGGCAGAGAAGCAGGGCACAATCAAGTTGATGAACAACCTGCTGAACAAGTTACCAATCCTGTTGCACCCGTTTCCCAAGCTGATCTTACTGCCATGTCGACTCGGCTAGAGCAGATGTTTAAAGACACCGTGACTAAAGTGTTGGCACAACATCAGCTAGCCCAAGCAGC…
Novel_G000291	Novel_T007558	GTTTCATCTTCTTCTCCATCAAGCCCACGCCTCCCTCCTCTCCACTTTGCCGCCGCTCACCGCGGTAAGTTTGGGCGAGTGTTTTTGGATCTTTATGCTTACGGTTGGTTTTGAAATACCCATTAAAGGTTGGGTGCAATTGGAACCCTCCTGATTCATTTCTTGATTTTCCATCAAGTTTGAGATTTAGTTCAACATCCAATTTGGATTGAATTTGGGAATTAGTTTGCAATAGGAAATTTTTATTAAGTTAAGGAAAATGACGGCACGTAAAGTTGCAAGTAGGGGTGGTCAAGGAGGCAGAGAAGCAGGGCACAATCAAGTTGATGAACAACCTGCTGAACAAGTTACCAATCCTGTTGCACCCGTTTCCCAAGCTGATCTTACTGCCATGTCGAC…
Novel_G000292	Novel_T007570	TAGGCAATGAGCTGAAAAAGTCGCATTCTTTGTGCCAATACCACTCGCCTTCCACGTGCCACTCCTTCCCATTTCACTATTGCCTTTCATTTTCCATTTCAGTTCTCCGTTTTTTTTCTTCTTCTTCTTCTTCTTCTTCTCCCCTTCCCCAAATCTCACCGGCGACCCTCCGACCCATCTCCATCCGCCTCTTTTTCCTCCCATTTCTCCTTTTTCTCCTTTTTCTCTGGTGGGATTTCGAAGGGTCGATTCGGTAACCACGGGGAAGTTCGAAGGTTAGGGCTTTTCTTCACTTTGGGCCTCTCTGAAAATGGAGACTTCGCCTTCCAATTCTGATCCTTACTCCAATTCTTCTTCACCCACAACTGCTCGTTCTTCCTCCAGATTTGCCTTATCCCT…
Novel_G000293	Novel_T007571	AAAGAATTGTCCAAAATTAGCAAGTCGTGAAAGCTTTATTATTCAACAGTGAATCTTCTTATCATCAAGACTCTACAAAACCAGCCATGGCCATAACCTTCCTTGCTATCATTTTATTCATATATTCAATTATTTATGCTATAAAATTTTCTCAATATTATCTCAAAGGAACTCCCTCAATTCGCCGGCTTCCACCTGGCCCAAAGCCATGGCCTCTCATTGGTTGCCTTCCAGCAATGTTGAGCAACAAAAACTTGCCAGCATACCAATGGATCCATGAAGTTATGAAGCAATTCAACACTGAAATTGCATGTATTCGTCTTGGATCAAATACCCACATAATTCCTGTGGCTTCTCCAGAACTCTCTCTTGAATTTCTAAACACACACGATTCTGTGT…
Novel_G000294	Novel_T007594	AAAGCTTTAACCCTTGTGCGATTCCGGCATCAACCCTCAATCCGACCATCACGTTCCGTCTTCAAATGCCATCGAGAAGGTGACCGTGGCGACGATGATAGGGGAGGTGGCTGCTTTGGTGGTCGTTGAGGCGGAGGCTTTCGTGATGAGGGTTTTCCATTTGAAGTCATCGAGGTTTCTACTTTTCTTCATGCATGTGAGGGAGATGCGGTCACAAAGTTCACAAATGAGAAGATTCCTTTCTCTAATGCCCCTATTTATCTCTAGAACAAAGACTCAAATAGAAAAAGTTGATGAAATTTTCGATCCCATCAATGAATCTATGAGTTCACTGGCCTTGATTTTGTTTGTTGTTTAGTTTTGATATATGATGAAAGGTGTTGTTTTCATTAAAAAAAT…
Novel_G000295	Novel_T007607	TTTCAAAGGTTTTTACTAGAAGAAGACGAAATATGAGAAAAGAAGTCAGCAGAGACAGAGCTGTGCAATGCAGAGATGAAATGGAGCAGTACACACACACACACACACACATGCTTCTTGCTTTCCCTCTCACTCTCACACTCTCTTTCTCTTTCTGAACTTTTGACCATGGATTCTCAATCTCCAACAAAAACCCTCTCTACCCATCTCCCCTTTTCCTCAAATGTAGCCTTCTAACATACATTCCTTAAATCTCTTGTTTTCTTCTCATTCTCCAAATCCAACCACACCCACCACACTTCTTTATTCCATGGACTACGAGAGGATTCTCAAGCCTCAGCCTCCCGGTGGAGGGGGGTTTTCACCTGGGAAGCTTAGGAATATGTTGCTTGGCTTGGA…
Novel_G000296	Novel_T007644	ACATGACTCCTCATTTCGAAGAAGCTTGAATTTCGTAGTTCACCGCCGACTTCGAAGCTTTCAATCTATTAAAAATCCTCTATGAAGTCTCGGATTCATGAAGAAATTCTCAAATTCTGGTGCTAAATTTCAGTATGATTGATGGTTCCAGGCATCATAATGCACCAGCAATCCTCTTCTGCAGTTTCTCCACACCATATCAATCCTCCGCCTTCCTCTCTTAGGTCACCTTCATCCACACCTCCCGCTGCCCACTCTCCACTGCCTCTCACCACTCACGTCTCCAATTCCCACCGGGAGCCATGCGACCATGTTGCCGGACCAGTGCTGCAATCCGCCGGTGATTCTGCTGTAGCTATGGCTTGCCCACTCGCCCGGGTCCGCTTGTCTGATATTGCC…
Novel_G000297	Novel_T007645	GAGACGCTGATTGAAGAAAAAGGCGACATGACTCCTCATTTCGAAGAAGCTTGAATTTCGTAGTTCACCGCCGACTTCGAAGCTTTCAATCTATTAAAAATCCTCTATGAAGTCTCGGATTCATGAAGAAATTCTCAAATTCTGGTGCTAAATTTCAGTATGATTGATGGTTCCAGGCATCATAATGCACCAGCAATCCTCTTCTGCAGTTTCTCCACACCATATCAATCCTCCGCCTTCCTCTCTTAGGTCACCTTCATCCACACCTCCCGCTGCCCACTCTCCACTGCCTCTCACCACTCACGTCTCCAATTCCCACCGGGAGCCATGCGACCATGTTGCCGGACCAGTGCTGCAATCCGCCGGTGATTCTGCTGTAGCTATGGCTTGCCCACTCGC…
Novel_G000298	Novel_T007656	TTTTTCTCTTTCTTTTTCTTCTCTTCTTTCACCGTGCCCGTCGAGCCGCCCCACCACTCTTCTCCTTCTTTTCTTCTCCGATCCACGGCCGCCGCCCCTATTTTTCTTCCTTCTCTTTCGTTTTTCTCTTCCGTTCAAACCACTGCCAACTGTCTATACTTCCGACGAAGCCAAGATCCCGCCGAGCCCAAGCTTCGTCCACGCAAGCACGCCGACGTCCGATCTCTTCTCCTCGTTCTGTCGCTACTGTACCGTTCGCCTGAAGTCGTCGTCCATTCGGGTTGCATAGTCCTCCAGCCGAGCCCGACAGTCCGTTTGCGCCTGCCTTCGGTGGATTTCATTCGCCTCAAATCTCGACTAGCCACCGTGCTCCACCCCCAATAGTCACGTCGTTGACCG…
Novel_G000299	Novel_T007664	ATATAATCCTCCCATTTTTCAAAACAATCCTTCTCTTTCTTCTTTTCCATCTTCTCTTTCCTCATTAATTTTTTCCTTTTCTTCTTTTCACACCCAAACAATTTAGGGCTTCTCTCTTCCTCTTCTCACAACCGTCTCTCTTACTCTTCTCCCAATCGTCTCGGTTCCTCTTCTCACAACCGAACAATTTATGGCTTCTCTCTTCCTCTTCTCACAACCCATCAATTAACTCTTCTATCTTCCTCTTCTCACAACTAAAGGAATTCCTCTCTTCCTCTTCGGCACTCACTGATTTTTCTCCATTGTTCAACACCATCATCTTCACGGTATTTTGATGCACGTTGGTTTTCTAAACCTCACATGTTTTTCTTTGTTGTTCGTCAGTCTTTGATGTCCCCG…
Novel_G000300	Novel_T007674	TTCGACGTGCTAATCCGGCGGCAGCAGAGCAACTTGCTCAAAATCAAGAGGCGGAGGAAAACCCCATCCTCCATCCTCTCTCCAAGAACTACCTCGAGACGCTTGCTGTCCGTGGAAGCTTATGTGGACAGAATCGAAAATACATTTCAAGAAGTCTTGCAAAGACTAGAGGCGTTGGCACCTCCTCAAGATGTTCATCAAGAAGATCAAGAACGAGTTCGTGACTGGGGGCAGTGTGACATCCGTGGTGATGGAATTTGTAAGGCTGAAAGAAATCGTCCAAAAAGGAGTTATGATGCCCAAGAACGAAGAAGACCATTTCAAGACTATTCAAATCCTTTTCCAAGAAATGTATCAAGAACCTCAAGATTGGAGTTCCTCTGATGATGAGCTGCAAAA…
Novel_G000301	Novel_T007675	TCTCTCATTCGTATTTCGTGGTCTTCTTCATTGTTCGTTCTCTGCTATTTGTGGGTCTCCTCCATTCATTCTCTGTCATTCGTGAATCCTCTCTCATTCTCCATCAATCTTTTCTCCTTAGTAGCCTCCGACGTGGGTCTTCGTAGGTTTGGCCTCTAGGTCTTTTTTATTATCCTTGTATAGCATCTTCGTGGATTCAGTGCTGGTTGAAGCTTTTGAGAAATGTTATGAAGTATGATAGGCCATCTCCTGCTAGACTGCAAATATTTAAAGATTTTGCTAAAGAAAATAAAATATAAGCAAAAAATTGTCTTACAATGGATGTTCCAACACGATGGAATTCTACTTTTACTATGTTGGATGGAGCAATTAAGTGTCAAAAGAAGTTTGAAAGATTAG…
Novel_G000302	Novel_T007676	CGTTCTCTCTCATTCGTATTTCGTGGTCTTCTTCATTGTTCGTTCTCTGCTATTTGTGGGTCTCCTCCATTCATTCTCTGTCATTCGTGAATCCTCTCTCATTCTCCATCAATCTTTTCTCCTTAGTAGCCTCCGACGTGGGTCTTCGTAGGTTTGGCCTCTAGGTCTTTTTTATTATCCTTGTATAGCATCTTCGTGGATTCAGTGCTGGTTGAAGCTTTTGAGGTATTTGACGATTTTATAGTATTTTTTATATAAACATTATGATTAATCATACTTTTATTTATGTAAATTTTAGGATTAGTTTGTTTCCTTTGTTCAGTTTTTTTGTTATCTTCGTTCGTGTTTAGAATAATAGGAAAATCACATTAGTTTTTTTTTTTGAAAAATTTTTGTGAC…
Novel_G000303	Novel_T007680	CTCGGTTTCTATTTTCCTCTTCAGCTTGTCTTCTACCTTCTCGATTTCGTCTTCTCTCTTTCTTGTTCTTCACCTTTGTTCTCCTCTATCTTCTTTCTTCAATGACTACAGCTTCGTTCTCCAGCTCTCTGTTCCTCTTCTCTCTTCTCTCTTCTCTGGCTCTCCATTCCTCTTTCACCTTCGTTCTCTGGCTAAAGGTATGTGTTTTTTTCTCTATTTCTTCATTCTCCAACAAGTAATAATATGGCTCTGTCTCCTGTCGAGATCTCCATCTCCCTTAAAATCGGGGTTTCCATCACTTGTGTATTGTTTTTGTTTTGTTTTATTTTTGTTGATGAATTTTTGTTTGTTGTTGATGGATTGCTTTCTATATTATCCTCCTCCAAAAATGCAAATCTA…
Novel_G000304	Novel_T007681	TTCAGCTTGTCTTCTACCTTCTCGATTTCGTCTTCTCTCTTTCTTGTTCTTCACCTTTGTTCTCCTCTATCTTCTTTCTTCAATGACTACAGCTTCGTTCTCCAGCTCTCTGTTCCTCTTCTCTCTTCTCTCTTCTCTGGCTCTCCATTCCTCTTTCACCTTCGTTCTCTGGCTAAAGCTCACGCAAATGAAAATTCCAAACCCTCACATGATTTCGATCATCTCCGACCATCAATCTGAATGGTGAGTGGATTGTGTCTGCTGACGTGTCTGGGATTGTGAGGATTTGGGCACTCATACTAAGTTCATGCTCAAGGAGTTTAAGGTTTTGTCTGGGCTGATCGATGATTTGCAATTGTCTCCTGATGGAATGAGGATTGTGGCTTGTGGTGAAGTGAA…
Novel_G000305	Novel_T007709	GTCCAAAATCGAGACGCATCTCAAATTTCAATCCCTTCGATCTATCTTACTCTCAGTTTGTCTATCTTCAACCGACATCAACTGCCTCTCAAATTTCTTTGATTTTGCACTGTTTAAGCCAAGATGTTGTTTGTGAACAAGTAGAATCAAGTGATAATTTGAGACTATTGAGTTCGAGAGCTACAGTGGAAACTGACGCGTGTTGTAGAGTATTATCACGCTACAAGAGAAAAAGACAAGTACAAAATACTTTAGAATTGAGGAATGATGTTGATCGGTATTTATCTGACCCTTGTGAGGAGTTAAATGATCAGTTTGATGTTCTAACTTGGTGGAAATTGAATGGGGCTAAATACCGAATTCTATCAAAAATTGCTCTAGATAGTTTTGTCGTTCTGG…
Novel_G000306	Novel_T007710	ATTTGTCCAAAATCGAGACGCATCTCAAATTTCAATCCCTTCGATCTATCTTACTCTCAGTTTGTCTATCTTCAACCGACATCAACTGCCTCTCAAATTTCTTTGATTTTGCACTGTTTAAGCCAAGGTAATTTCTTATGATTTTCTTGCATCTCGAACAAACTAAGAGAAAATAAATCTTTATTCACACATTTGCATCAGTACTTAACAATGTCTGCATGAATTCTTAAATATCCTCTTTATTTATCTTCACAATTTCACATGCTTTCGTATCTGTATAATGGACACAATATTTTTAGGTTGACAGACATATTTATTTTTTCACAATTTCACCATAGTATGTTGACAGTACATATTTATTTTTTGAGTTTGTTGAGACAGTAGCATAAATATTGAAAT…
Novel_G000307	Novel_T007711	TATTTGTCCAAAATCGAGACGCATCTCAAATTTCAATCCCTTCGATCTATCTTACTCTCAGTTTGTCTATCTTCAACCGACATCAACTGCCTCTCAAATTTCTTTGATTTTGCACTGTTTAAGCCAAGGTAATTTCTTATGATTTTCTTGCATCTCGAACAAACTAAGAGAAAATAAATCTTTATTCACACATTTGCATCAGTACTTAACAATGTCTGCATGAATTCTTAAATATCCTCTTTATTTATCTTCACAATTTCACATGCTTTCGTATCTGTATAATGGACACAATATTTTTAGGTTGACAGACATATTTATTTTTTCACAATTTCACCATAGTATGTTGACAGTACATATTTATTTTTTGAGTTTGTTGAGACAGTAGCATAAATATTGAAA…
Novel_G000308	Novel_T007743	TTCCTCTTCCTCGTGCCCTACCTCCAGCCGCACCCTCCAGCCGACCACCATCACTTTTCTCCTTTTCTTCTCCGATCCACGGCCGCCGCCTCTATTTTTCTTCCTTCTTTTTCGTTTTTCTCTTCCGTTCAAACCACTACTGACTGCCTCTATTTCCGACGAAGCCAAGATCCAGTCGAGTCCAAGCATCGTTCACGCAGGCACGCCGACGTCCGATCTCTTCTCCTCGTCCCATCGCCGCTGCACCATTCTCCTGAGGTCGTCGTCCGTTCGTGTTGCACAGCCGAGTCGCGACTCCTTCGCGCGCATAGTCCCACAGCCGAGTCATTCGTTCCCCACAGAAACCACTCGTGAGTTGCGGGCCGTTTGTCCAAGCCGGCTTGCACTCCACTCTTTTGC…
Novel_G000309	Novel_T007780	CCAAAATCCACCAAAGTCCAAGTTCAACCCAAAATAGGCAAAGAAGAGAGAAAGGGCCAAAGAAGAGACAAAGAACTGAAGAACATCTCAACTCCGGCTTCCAGTTCAAGAACGAAGCCTAGATTCCATTGCTGCAGCTCGCACTATAGTTTCCTTCTAATCTCTTCATCTCTGTAGCTCGCGACAACCCTCTTTTCCCCATTTCATTCTTCCGTGTTCTCTGATTATGCCAGACGTGCAAGCCATTGTGAATGATTTCGTTATCAAGCTTATGAAGCGGAAAATTGAGGGTTCCTTGGCCACAGCGAAGCATACGGCTGAATTGCTTCGTTCTGTCATTTCGGCGCAGCGAATACCCTACACGAATCAGGCGGCTGCTTTGATTGATGCTGTTAAAGC…
Novel_G000310	Novel_T007781	CCAAAATCCACCAAAGTCCAAGTTCAACCCAAAATAGGCAAAGAAGAGAGAAAGGGCCAAAGAAGAGACAAAGAACTGAAGAACATCTCAACTCCGGCTTCCAGTTCAAGAACGAAGCCTAGATTCCATTGCTGCAGCTCGCACTATAGTTTCCTTCTAATCTCTTCATCTCTGTAGCTCGCGACAACCCTCTTTTCCCCATTTCATTCTTCCGTGTTCTCTGATTATGCCAGACGTGCAAGCCATTGTGAATGATTTCGTTATCAAGCTTATGAAGCGGAAAATTGAGGGTTCCTTGGCCACAGCGAAGCATACGGCTGAATTGCTTCGTTCTGTCATTTCGGCGCAGCGAATACCCTACACGAATCAGGCGGCTGCTTTGATTGATGCTGTTAAAGC…
Novel_G000311	Novel_T007782	AAAATCCACCAAAGTCCAAGTTCAACCCAAAATAGGCAAAGAAGAGAGAAAGGGCCAAAGAAGAGACAAAGAACTGAAGAACATCTCAACTCCGGCTTCCAGTTCAAGAACGAAGCCTAGATTCCATTGCTGCAGCTCGCACTATAGTTTCCTTCTAATCTCTTCATCTCTGTAGCTCGCGACAACCCTCTTTTCCCCATTTCATTCTTCCGTGTTCTCTGATTATGCCAGACGTGCAAGCCATTGTGAATGATTTCGTTATCAAGCTTATGAAGCGGAAAATTGAGGGTTCCTTGGCCACAGCGAAGCATACGGCTGAATTGCTTCGTTCTGTCATTTCGGCGCAGCGAATACCCTACACGAATCAGGCGGCTGCTTTGATTGATGCTGTTAAAGCTG…
Novel_G000312	Novel_T007783	AAAATCCACCAAAGTCCAAGTTCAACCCAAAATAGGCAAAGAAGAGAGAAAGGGCCAAAGAAGAGACAAAGAACTGAAGAACATCTCAACTCCGGCTTCCAGTTCAAGAACGAAGCCTAGATTCCATTGCTGCAGCTCGCACTATAGTTTCCTTCTAATCTCTTCATCTCTGTAGCTCGCGACAACCCTCTTTTCCCCATTTCATTCTTCCGTGTTCTCTGATTATGCCAGACGTGCAAGCCATTGTGAATGATTTCGTTATCAAGCTTATGAAGCGGAAAATTGAGGGTTCCTTGGCCACAGCGAAGCATACGGCTGAATTGCTTCGTTCTGTCATTTCGGCGCAGCGAATACCCTACACGAATCAGGCGGCTGCTTTGATTGATGCTGTTAAAGCTG…
Novel_G000313	Novel_T007822	CTTTTCCCTTAAACAAAATTCAATTTCCCATTCCTTTCTTCTTCGTCGTCCTCGCTTTTCATTCCGTTGTCCATAAAGCCATCTTCAGTACAATTTGGGAGGTAAACGGCAGCGCTGTTATTGGGTGTTCCTATTCAACCATTCCAATTCGATCCTAACCCCACTCTCTCTCTTATTCGTATTTTCATTTCGATCCGAAGCCATCGCACTGTGTTCTCATGTCTATGTGAGCCAACATTTTTCCTGCTAGGGTCCTTGGGGGGTCTAGATTTTCTTCCGAGATTTGGGAGCTATCAAAACAGGTTAATCTGCCTGCTGTTCTTCTGCCAATTCGTTGTGTTCAGTTTAGGGATTCTGTAATTGCGCATCGGCCATGCGCTTCAACGAATTAGCGAGTTC…
Novel_G000314	Novel_T007920	CTCAATTCTAATGTTCATTATCGACCACCATTAACTTGTAATCATTCCATTTTAGGAAGGAAAATCTGTAAATCAAATGAGCAAAGTTCCAAAGTTACATAACCAGAGAATTGGCGCCAGATTTGAGTTGGGTTTTGAGTATCTTCATCTAATTAGAAGATACAGTTTCCATGTTCATGAAGCAGCTTTCTATTTTTAGTTTTTCAATCAAAAGGATATCATATTTTCCATAATTCTTACGTTTTAGCTTTAGTGCAGTGATTATGGCTTTTGAGTTTTGAATAATCAAGATAAAAATGTGTTAACAAAAAAAAAAAAAGATTTTGGATCGTGTAGAACAGAGCATAGAGTGGATCGCCAGATTTAACATAATGCACAGATGCGCTTTGTTTCTCACGA…
Novel_G000315	Novel_T007953	CTTTCCTCGTTAAATTCTTCATTTCCTTCTTTTCACACCCAAACAATTCAGGGCATCTCTCTTTCTCTTCTCACAACCGTCTCTCTTCCTCTTCTCACAGCCGAAAAATTTAAAGCTTCTATCTTCCTCTTCTCACAGTCAAACAGTTTAAGGTTTCTCTCTTCCTCTTCTCACAACCGAACAATTAACCTTTCTCTCTTCCTCTTCTCACAGCCAAACAATTAACCTTTCTCTCTTCCTCTTCTCACAGCCGAAGGAATTTCTCTCTTCCTCTTCGGCGCTCACTGATTTTTCTCCATCGTTCAATACCATCTTCTTCACGGTATTTTGATGCACGTTGATTTTATAAACCTCACATTTTTTTTCTTTGTTGTTCTTCGGTCTCCGATGTCCCTGTGG…
Novel_G000316	Novel_T007963	CAGAACACGAAAAGCATTTGGGCATGGTTTTTGCAGTAATGCGGGATAACCAATTAGTTGCCAACAAAAAAAAAATGCGTAATAGCTCATTCGCAGATTCAGTATTTGGGGCATTTAATATCCAGTAGAGGGGTTGAAGCGGATGGAGAAAAGATCAAGGACATGGTAAATTGGCCCCAGCCCAAAGATGTAACCGGATTGAGGGGGTTCTTAGGGCTGACAGGTTACTACAGAAGATTCGTCAAAGGGTATGGGGAGATGGCAGGACCGTTGACCAAATTATTACAAAAGAACTCATTCCTATGGGGGGAAGAAGCAACAGAGGCGTTTGATAAGCTGAAATTAGCCATGACAACCCTACCCGTACTAGCTCTACCGGATTGGAACCTGCCTTTCATC…
Novel_G000317	Novel_T008020	TTTTTCTTAGGAAAAAAAAATCAATATATACTCTGCCCAGCTCACAACCCTAACTTCAACCTTTTTCTTGAAACCTTTCGATCCAAACCCAAAATGTGTAAGATTTCGTCCACATTTTTTCTATATTTCATACAAAAACGTTTCGTCAATACGGTTTCTACTCCTACGTTGCCTTCAGCGTCTGTTTCCACAATTGAATTCCTCAAAAATTCATGTGGGCTTCCTTCAGAATCTCCTTCTTCCGCCCGTCAAAACCCCCAAATAGATGAAAGAAACATCCAGCACTACCAAGCCATTCTCGGTATCTTGCAATCGCATGGATTCGAGAATTCACAGATCGCCAAGTTGGTTTCGAGACAACCTTCGGTTCTTCGATCCAAAGTATCCACCAATCTGAAG…
Novel_G000318	Novel_T008021	TTTCGATCCAAACCCAAAATGTGTAAGATTTCGTCCACATTTTTTCTATATTTCATACAAAAACGTTTCGTCAATACGGTTTCTACTCCTACGTTGCCTTCAGCGTCTGTTTCCACAATTGAATTCCTCAAAAATTCATGTGGGCTTCCTTCAGAATCTCCTTCTTCCGCCCGTCAAAACCCCCAAATAGATGAAAGAAACATCCAGCACTACCAAGCCATTCTCGGTATCTTGCAATCGCATGGATTCGAGAATTCACAGATCGCCAAGTTGGTTTCGAGACAACCTTCGGTTCTTCGATCCAAAGTATCCACCAATCTGAAGCCTAAATTTGAGTTCCTCCAGGAAATCGGGTTCGATGGTCCTTTACTTCCTAAGCTAATTCTATCAAACCCTTGG…
Novel_G000319	Novel_T008028	CAGCACCTCATCCCAATCCTTTGCCTCCAACTCTCTTGTTCCCGCCCTTTTCGTCATCCACGACTCCGGGCCGATCATCTTCCCTACGGTTGAGATTTCGACACCCGTACTACCACTGGAAGGTTCTGTAATGGAAGAATTCCCGTCGATTTTCTTGCCCTACGTCTTGGACTTCCGTTTGTTCTGAGTTATCTTGGGCACGTTGGAGCAGTGGAAGATATGATTCAAGGAGTGAATTACGCATCGGCTAGTGCTGGAATTATCCAATTCAGTCCTTTACATATCAATTGGAA
Novel_G000320	Novel_T008033	CCGGTTCCCACACTGTCGTTGGTCGTGGAGCTCAAAACACTAATCACAACCCTTTCTTCATTTTCTTCATTCTCTTCATTCTAACCCCATGATGTTCAAAATTTCTTCCACTTTTCTTCTACATTTCATCCATAAACCTTTTCTGAACACTATTTCTACTTCTACATTGCCTTTAGCCTCTGTTTCTACCATCCAATTCCTCAAAACTTCATGTGGCCTTTCTTCGGAATCTCCTTCTATCAACGGTCGAAAGCTCAAGTTCGATGAGAAAAGCATCCAGCAGTACGAAGCCGTTATCGGTTTCTTGAAATCGCAAGGATTCGACAATCTACAGATCGCGAATTTGGTCTCGAAGCGACCTAAGATCCTTGGATCCAGAGTATCCACCAATCTGAAGCC…
Novel_G000321	Novel_T008035	AAATTCACAATCTATATTCATCTGGGCTTTTCCACTCTATCGATGTTCACGGAGCTCAAAACCCTAATCCAAAACCTTGCTTGAATTTCTTCAATCCAATCTCAAAATGTCCAAAATTCCCTCCACTTTTCTTCTACATTTCATCCATAAACGTTTTCTCAATGCCATTTCTACTTCTACATTGCCTTTGCCCTCTGTTTCTACCATCCAATTCCTCACTAATTCATGTGCCCTTTCTTCAGAATCTCCTACTTCCAAAGGTCGAAAGCTCCAGTTCGATGAAAAACACATCCAGCAGTACGAAGCCACTATCGGTTTCTTGAAATCACATGGATTCGAGAATTCACAGATTGCCAAGTTGGTCTCTAGGAAACCTCAGATTCTTCAATGCAAAGTACC…
Novel_G000322	Novel_T008037	CGTTAATGGGTTTTACGGTTCCCACTTCCCACAGTACCGTTGATGTTCGTGGAGCTCAAAGAACCCTAACCACAACCCTTTCTTCATTTTCTTCATTCCAAATCCCAATATGTCCAAAATCTCCTCCACATTTCTTCTTCATTTCATCCATAAACGTTTTCTCAATACCATTTCTACTTCTGCACTGCCTTCACCCTCTGTTTCTACCATCCAATTCCTCACTAATTCATGTTCCCTTTCTTCAGAATCTCCTACTTCCAAAGGTCGAAAGCTCCAATTCGATGAAAAACACATCCAGCAGTACGAAGCCATTATCGGTTTCTTCAAATCATATGGGTTCGAGAATCCACAGATCGCCAATTTGGTTTCGAGGCGACCTTCGATCCTTCAATCCAGAGT…
Novel_G000323	Novel_T008041	GGTTTCGTCTCGGCGGGGTGCGGTGGGGATGTTCGCGGAGCTCAAAACCCTAACCAAAACCCTTCCTTCATTTTCTTCATTCTAACCCCCAATATGTTCAAAATTTCCTCCACATTTCTTCTTCATTTCATCCACAAGCGTTTTCTCAATACCATTTCTACTTCTACATTGCCTTTACGCTCTGTTTCTACCATCCAATTTCTCACTAATTCATGTGGCCTTTCTTCAGGATCTCCTTCTTCCAACGGTCGAATGCTCCAATTCGATGATAAAAGCATCCAGCAGTACGAATCCGTTATCGGTTTCTTGAAATCGCATGGATTCGATAATCTACAGATCGCCAATTTGGTCTCGAGGCGACCTAACATCCTTGGATCCAGAGTATCCACCAATCTCAAG…
Novel_G000324	Novel_T008042	TTCGTCTCGGCGGGGTGCGGTGGGGATGTTCGCGGAGCTCAAAACCCTAACCAAAACCCTTCCTTCATTTTCTTCATTCTAACCCCCAATATGTTCAAAATTTCCTCCACATTTCTTCTTCATTTCATCCACAAGCGTTTTCTCAATACCATTTCTACTTCTACATTGCCTTTACGCTCTGTTTCTACCATCCAATTTCTCACTAATTCATGTGGCCTTTCTTCAGGATCTCCTTCTTCCAACGGTCGAATGCTCCAATTCGATGATAAAAGCATCCAGCAGTACGAATCCGTTATCGGTTTCTTGAAATCGCATGGATTCGATAATCTACAGATCGCCAATTTGGTCTCGAGGCGACCTAACATCCTTGGATCCAGAGTATCCACCAATCTCAAGCCT…
Novel_G000325	Novel_T008043	ATTTTTTCTACTTCATTAGATTTTTTTAATTCTCCATAACAATTTCTTTATTATTTGAAAGTAAAATTAAAAATGATTATTTAACTAAATAACAAATAATAAATAATAAACAAACTTCAAAAGATTCATTCATCTCTATAGGGTGGGGAATGGGATGTTCGTGGAGCTCCAAAGCCCTAACCCTAACCCTAACCCTTCAATTTCTTCAATCCAATTCCCAAAATGTCCAAAATTTCCTCCACATTTCTTCTACATTTCATCCATAAACGTTTTCTCACCACCATTTCTACTTCTACATTGCCTTCCCCTCTATTTCTACCGTTCAATTCCTCAAAAATCCATCTGCCCTTTATTCAGGATCTCCTACTCCCAACGGTCCAAAGCTCCAATTCCATGAAA…
Novel_G000326	Novel_T008044	TGTTCGTGGAGCTCCAAAGCCCTAACCCTAACCCTAACCCTTCAATTTCTTCAATCCAATTCCCAAAATGTCCAAAATTTCCTCCACATTTCTTCTACATTTCATCCATAAACGTTTTCTCACCACCATTTCTACTTCTACATTGCCTTCCCCTCTATTTCTACCGTTCAATTCCTCAAAAATCCATCTGCCCTTTATTCAGGATCTCCTACTCCCAACGGTCCAAAGCTCCAATTCCATGAAATAGACATCCAGCAGTACGGAGCCATTATCGGTTTCTTGAAATCACATGGGTTCGAGAATCCACAGATCGCCAAGTTGGTTTCCAGGCAACCTTCGATCCTTCAATCCAGAGTCGCCACTCTGAAACCTAAATTTGAGATCCTTCAGGAAATCGGG…
Novel_G000327	Novel_T008045	GTTCGCTTCGTTGAGCTCAAAACCCTAACCAAAACCCTTTCTTCCTTTTCTTCATTCCAAACCCCAATATGTCCAAAATTTCCTCCACACTTCTTCTACATTTCATCCATAAACGTTTTCTCAATACCATTTCTACTTCTACATTGCCTTCACCCTCTCTTTCTACCATCCAATTCCTCACTAATTCATGCGGCCTTTCTTCTGGATCTCCTACCTCCGCCGGTCGAAAGCTCCATTTCGATGAAAAACACATCCACCAGTACGGAGCCATCATCGGTTTCTTCAAATCTCATGGATTCGAGTATCCACAGATCTCCAATTTGATCTCGAGGCGACCTTCGATCCTTCAATCCAGAGTATCCACCAATCTGAAGCCTAAATTTGAGTTCCTTCAGGAAA…
Novel_G000328	Novel_T008046	GTACGAGATAGGTGCGAGATGTGTACGAGATAGGTGCGAGATGTGTACGAGATAGGTGCGAGATGTGTACGAGATAGGTGCGAGATGTGTACGAGATACGTGCCTTCAACCATTCAATGAAAATGCACAACAACAAAAGCAATCCGATCAAAACATCCCTAAACAGAAAGTGCGTGGTTATAAAAAAAAAGACTGAGAAAGGAGAATCTTGCATGCCGCATCTTCGATGGAGAATCTTGCACGACGCGTACAAACTGACCACCAATGGATGCCTGAACGGTTGACAACGGTAAATGAGATGCGACAGCAACTGAGAAAGGAGAAGAGTTGAAGTCGGGCTGCCCTTTGTCTTAGTAGAAGAGAAAGTGAGGGAGAAGGAGAAAGCCGCAAGAAGAGAAC…
Novel_G000329	Novel_T008047	ATTTTGTTGAAAGAAAAAACCAATTCAAACCAATCCATCGTGCAACCCACAACCAATTCCCTCTTCATATACACTCTCCTCCACCACCCCCATTTCCATCCATTTCCCATTTCCCATTTCCCATTTCCTCCCACTCCATAATCATCATCATCATCATGGCCGAGCCCAGGAAATCTTCCTCCCCTTCACCGGCCCCGCCGTTTGGTTCGTCTCCATCGTCGTCACCACGTCCGGCTATTTCACTCCAACCATCTCCCAAACGCCCAGCTTTCTCCAAACCTACAAAGCTCCTCCGCCAAATCCGCGCCGTCTTCCGCACACTTCCTATTCTCTCACCTGCCTGCCGAATTCCACTCAACGGCAGTCGGCTTCACGACGGCCACGTCCACGGCGGCACTC…
Novel_G000330	Novel_T008051	CTTAAACCCTTACTTCAATTTCTTCAATCCAATACCGAAAATGTTCAAAATTTCCTCCACATTGTTTCTACATTTCATCCATAAACGTTCTCTCAATACCATTTCTACTTCTACATTGCCTTTACCTTCTGTTTCTACCATTGAATTCCTCACTAATTCATGTGGCCTTTCTTCAGGATCTCCTACTTCCGCCGGTCGAAAGCTCCAATTCGATGAAAAACACATCCACCAGTACGAAGCTATTATTGGCTTCTTGAAATCTCATGGATTCGATAATTCACAGATCGCCAAGTTGGTCTCGAAGCAACCTTCCATCCTTCAATCCAAAGTACCCAACAATCTGAAGCCTAAATTTGAGTTCCTCCAGGAAGTCGGTTTCGTCGGTCCTTTACTTCCTAA…
Novel_G000331	Novel_T008065	ATTTCATATTATATAATATTGTAAGAGAAACGCCCAAATTTGTGGCGTTCGAATTCAAAACCATAAACCAAAACCCTTACTTGAATTTCTTCAATCCAAACCCCAAATGTTCAAATTTTCATCCACATTTCTTCTTCATTTCATCCATAAACGTTCTCTCAATACCATTTCTACTTCCACATTGCCTTCACCCTCTGTTTCTACCATCCAATTCCTCACTAATTCATGTGGCCTGTCTTCTGGATCTCTTACTTCCAATGGTCGAAAGCTCCGGTTCGATGAAAAACACATTCAGCAGTACGAAGCCATTATCGGTTTCTTCAAATCTCATGGATTCGAGAATTCACAGATCGCCAATTTGGTCTCGAGGCGACCTTCGATCCTTCAATCTAGAGTATC…
Novel_G000332	Novel_T008081	AAAACCCTTACTTGAATTTCTTCAATCCAATCCCCAAATGTTCAAATTTTCCTCCACGTTTCTTCTTCATTTCATCCATAAACGTTCTCTCAATACCCTTTCTACTTCTACATTGCCTTTACCCTCTGTTTCTACCATCCAATTTCTCACTAATTCATGTGGCCTTTCTTCTGGATCTCCTACTTCCCACGGTCGAAAGCTCCAATTCGATGAAAAAAACATCCAGCAGTACGAAGCCATTGTCGGCTTCTTCAAATCACATGGATTCGAGAATTCACAGATCGCCAAGTTGGTCTCGAAGCAACCTTCGATCCTTCAATCCAAAGTATCCAATAATCTGAAGCCTAAATTTGAGTTCCTCCAGGAAAACGGTTTCGTCGGTCCTTTACTTCCTAAGCT…
Novel_G000333	Novel_T008082	TCGAATTCAAAACCCTAAACCAAAACCCTCATTCAATCCAATCCCGAAATGTTCAAAATTTCCTCCACATTTCTTCTTCATTTCATCCATAAACGTTCTCTCAATACCGTTTCTACTTCTACATTGCCTTTACCCTCCGTTTCTACCATCCAATTCCTCACTAATTCATGTGGCCTTTCTTCTGGATCTCCTACTTCCAAAGGTCGAAAGCTCCAATTCGATGGAAAAAGCATCCAGAAGTACGAAGCCATTATCGGTTTCTTGAAATCACATGGATTCGAGAATTCACAGATCGCCAAGTTGGTCTCGAAGCAACCTTCGATCCTTCAATCCAAAGTATCCAATAATCTGAAGCCTAAATTTGAGTTCCTCCAGGAAGTCGGTTTCGTCGGTCCTTTA…
Novel_G000334	Novel_T008123	CGACCCTCTATATAGACTAATTTGCCCAACTTCTTCATTCCACACATCGTCCCCCTTCTCCCTCTAAAGAGTAGAGACCTTTAAGAAAAATGCATTATCACATTGAGATAATGATGAGTAGCATTTTCATTTGGCTTCCTCTCCTCTTTCTCTTAACAAAAAAGCTTCTTCACAACAAAAACAACAACCTTGTTAATCCTCCTCCAAGCCCTCCAAAGCTTCCTTTATTAGGTCATTTACACCTCCTTGGCTCCCACCCTCATCGCTCTTTATACAACCTTTCACAAAAAAATGGCCCCATCATGCTCCTGAAACTCGGTTCCGTCCCAACCATCGCCATCTCTTCTGCAACAGCCGCCAGAGAGCTATTCAAACACCACGATCTCGCATCTTGCAGTC…
Novel_G000335	Novel_T008124	GTTACATTGTTGAGATGAAGATTGATAGCATTTTCATATGGTTTCCTCTCCTCTTTCTCTCAACTTCTCTACTTCTTCTCAAAACCAAAAGGCTTATTTACAGCAACAACAAGAAGCTTATTACGACTAATCCTCCTCCAAGCCCTCCGAAGCTTCCTTTCTTGGGTCATTTACACCTCCTTGGCTCCCACCCTCATCGCTCTTTATGCAACCTTTCACGAACACACGGCCCCATCATGCTCCTGAAACTCGGTTCTATCCCGACCGTCGTCATCTCTTCCGCAACAGCCGCGAGAGAGCTATTCAAACACCACAATCTCGCATCTTGCAACCGCCCTCGCTTAACAGGAAGTGGAAGATTATCCTACAACTTCCAAGACCTGGCTTTTTCCCCATATG…
Novel_G000336	Novel_T008125	CTCAAATGCTATAGTTGAGTCATACAATATGAATAGCCTTTCCATTTGTGTCCTTTCTCTTCTCTTTTTCTTATGTTCTCTGATCCTTCTAAAAACCAAGAAAAATGTTGAACTTAAACACAACAATAACCATAAATTTCTTCCTCCTCCAAGCCCTCCCAAGCTTCCTTTGTTAGGTCATTTACACCTCCTTGGCTCTCACCCCCATCGCTCCTTATGGAACCTTTCCAGAACCCACAGTCCCATTATGCTCCTCAAATTTGGCTCCGTCCCGACCGTCATCATTTCTTCTGCAAAGATTGCAAAAGAGTTGTTCAAATGTCATGACCTTGCTTCTTGTAGCCGCCCTCGCTTAGCGGCGACCGCAAAATATTCATACAACTTCTTAGATTTGATTTT…
Novel_G000337	Novel_T008126	CTTATATTTCCTATATAACCCTACCAACACAATGTCCATTACTTTGTACCTTTCTTTTTGATCTTCATCTCTCAAATGCTATAGTTGAGTCATACAATATGAATAGCCTTTCCATTTGTGTCCTTTCTCTTCTCTTTTTCTTATGTTCTCTGATCCTTCTAAAAACCAAGAAAAATGTTGAACTTAAACACAACAATAACCATAAATTTCTTCCTCCTCCAAGCCCTCCCAAGCTTCCTTTGTTAGGTCATTTACACCTCCTTGGCTCTCACCCCCATCGCTCCTTATGGAACCTTTCCAGAACCCACAGTCCCATTATGCTCCTCAAATTTGGCTCCGTCCCGACCGTCATCATTTCTTCTGCAAAGATTGCAAAAGAGTTGTTCAAATGTCATGACC…
Novel_G000338	Novel_T008159	CGGAAACCCTAAAAGAGCGAGTGGTCACCTATAAAAGGCAAGCATTCTTCTCCCCCAAACCCTTGTTATTCCCAATCGGCCGTGCGGCAACCGAAGCCTCTCAACCATGCAGATCTTCGTGAAAACCCTAACGGGTAAGACCATCACTCTCGAAGTCGAGAGCTCCGATACCATCGACAATGTCAAGGCAAAGATCCAGGACAAGGAAGGAATCCCTCCGGACCAGCAGCGTTTGATTTTCGCCGGAAAGCAGCTTGAGGACGGCCGAACACTAGCCGACTACAACATTCAGAAGGAATCCACGCTCCACCTTGTGCTCCGTCTCAGAGGAGGTGCCAAGAAGCGTAAGAAGAAGACCTACACCAAGCCCAAGAAGATCAAGCACAAGCACAAGAAGGT…
Novel_G000339	Novel_T008241	TCTGAATCTCCAAGATGGGTCTCAACAAATTATGGAATTTACCACCTTTGAGAAGAGAAGTTACCTTCTCAAGCATGTTCCACTCAACCATCAACACAAAATGACGCAATTGGAAATAAAAAGTTCAATTTGATGGGAAAAGGGATTTCTTTGCCGTTTCACAAGTTATTGACTATATAGTTAGAGTGGATTAATATTCTTGGAGGCTTTGAAACATGTATGTGTTGGAGAGCAAAGGTGGGGCTATAGCATGTATGCTGTTAGCGCTTTTCTTTTTGGGAACATGGCCTGCACTCTTGACTCTCCTAGAACGGCGGGGCCGTCTTCCTCAGCATACTTACCTCGATTACTCCATAACAAATTTTTTGGCTGCTGTAATTATTGCTTTAACGCTTGGTG…
Novel_G000340	Novel_T008242	TGGGGGTTCCATATTCTACGGAGTCATCCTTTGAGATTCCGTTTTCTATTTATTTTCCCCAAATTTTTGAAATGTTCCAGTGGTTTTAATTTGTGTTCTGGTTTGATTCGTTTTGTGATTCTCAAACCCATTGCGATTTTTTGAGTATTTTATTGGCTTTGGAGGTTGTTCCATGCCTTTTTGTTCTTTTCTTTTCTCCGATTGATTGGCTGTTCGTTACTCATTTCTGGGTATAGGATTGGAATTTCTCTGTTTGTGAGATGTGACATTAAACTTGTAATTCGTTTGATGGTGTTGTTTAGTTTTCTTGCTTTCGTCTTTAAGATCGTATAAGAGTCTAGATTCTGCTTTCAAATCCATGCAATATCAGTTTTTTTCTTAATTAATGTTGACTTCCAC…
Novel_G000341	Novel_T008243	TGGGGGTTCCATATTCTACGGAGTCATCCTTTGAGATTCCGTTTTCTATTTATTTTCCCCAAATTTTTGAAATGTTCCAGTGGTTTTAATTTGTGTTCTGGTTTGATTCGTTTTGTGATTCTCAAACCCATTGCGATTTTTTGAGTATTTTATTGGCTTTGGAGGATTTCTTTGCCGTTTCACAAGTTATTGACTATATAGTTAGAGTGGATTAATATTCTTGGAGGCTTTGAAACATGTATGTGTTGGAGAGCAAAGGTGGGGCTATAGCATGTATGCTGTTAGCGCTTTTCTTTTTGGGAACATGGCCTGCACTCTTGACTCTCCTAGAACGGCGGGGCCGTCTTCCTCAGCATACTTACCTCGATTACTCCATAACAAATTTTTTGGCTGCTGTAA…
Novel_G000342	Novel_T008244	GGAGTCATCCTTTGAGATTCCGTTTTCTATTTATTTTCCCCAAATTTTTGAAATGTTCCAGTGGTTTTAATTTGTGTTCTGGTTTGATTCGTTTTGTGATTCTCAAACCCATTGCGATTTTTTGAGTATTTTATTGGCTTTGGAGGTTGTTCCATGCCTTTTTGTTCTTTTCTTTTCTCCGATTGATTGGCTGTTCGTTACTCATTTCTGGGTATAGGATTGGAATTTCTCTGTTTGTGAGATGTGACATTAAACTTGTAATTCGTTTGATGGTGTTGTTTAGTTTTCTTGCTTTCGTCTTTAAGATCGTATAAGAGTCTAGATTCTGCTTTCAAATCCATGCAATATCAGTTTTTTTCTTAATTAATGTTGACTTCCACTTGTTGAATATTCTCACAC…
Novel_G000343	Novel_T008377	ATTTATAAGAAAACAGAAAATTATGACGAGTAAGAACGGAGGCGGAGGAAACGAGGATAGAGTTCTATTGGAAGGAAGTAATGATCGGAACGAAGATGAAACGGTGTCTAAGCTCACCGTATCTACATTGCAAGCTAGAGAAGAGGAGATTGAGAGGAAGAAAATGGAAGTAAAAGAGAAGGTTGAACTTCAGTTAACCCGTGCAGAGGAAGAAGCCAAACGGTTGGCACAAATTTGGGAAGAGCTGGAGGTAATGGGAGATCCAATGGGTAAGGAAGTTGGTAATGTGCGAAAAAGAATTGACACAGTCAAGAGAGAACTGAAATCTCTGGGACAGATCTGCCAAAAGAAGGAAAAAGAATACAAGGAAGTCCAGGATATATTCAACGAAAAAAGCAA…
Novel_G000344	Novel_T008388	AAAAAATTCCTTTATATTTCTCTTCCATTCACAGCCTCTTTGACAACCTAACCTCTCGTTCTCTCTCGTTTTTACAAACACAATGTTGGCCGGTGAAAGAATCTTGGGATGCTTCGACATAAGGAGCATTGTCGTCCACGTCATCACTAGACGGTGGTTTGTGTTGTTCGCTTCACTCCTAATCATGGGCGTGGCAGGATCAACGTACATATTTAGCTTGTACTCAAACGACATAAAATCAACTTTGGGTTATGACCAAACAACATTGAATTTGTTGAGTTTTTCTAAGGATCTGGGTGCAAACATTGGTGTTTTGTCTGGACTTATCAACGAGGTTACGCCGCCATGGGTGGTTTTGTCCATTGGTGCCTTAATGAATTTCTTTGGTTACTTTATGAT…
Novel_G000345	Novel_T008389	AATAAAACCAACCTTCTTATCACTTTCTCTTTCTCTCTTACGCTCTTCTTTCTTTCTTTCAAAAGAGAAAACAAAACCCTCAAAATCTCCCACTTTTGTTTTCTTCATAAAACAATAATCCCCACTTCCAAAAATGGTGGCCGACCGGAGAATCTCTGGTTGCTCTGACATAAGTAGCATCGGGGTCCACGTAATCACTGGACGGTGGTTCGTGGTGTTCGCTTCACTCCTAATCATGGCAGCGGCCGGAGCGACGTACATGTTCGGCTTGTACTCAAGCGACATAAAATCTGTTTTGGGTTACGACCAAACGACGTTGAATTTGCTGAGTTTTTTCAAGGACTTAGGTGCAAACGTCGGCGTTTTGTCTGGACTTATTAACGAGGTTACGCCGCCATG…
Novel_G000346	Novel_T008390	CTTCAATAAAACCAACCTTCTTATCACTTTCTCTTTCTCTCTTACGCTCTTCTTTCTTTCTTTCAAAAGAGAAAACAAAACCCTCAAAATCTCCCACTTTTGTTTTCTTCATAAAACAATAATCCCCACTTCCAAAAATGGTGGCCGACCGGAGAATCTCTGGTTGCTCTGACATAAGTAGCATCGGGGTCCACGTAATCACTGGACGGTGGTTCGTGGTGTTCGCTTCACTCCTAATCATGGCAGCGGCCGGAGCGACGTACATGTTCGGCTTGTACTCAAGCGACATAAAATCTGTTTTGGGTTACGACCAAACGACGTTGAATTTGCTGAGTTTTTTCAAGGACTTAGGTGCAAACGTCGGCGTTTTGTCTGGACTTATTAACGAGGTTACGCCGC…
Novel_G000347	Novel_T008611	CTGCCACAGGAAAGCTCGGACGTGCCAACGAAAATTGAAGATGATGAAAATGAGGGAGAGGCATGAAGAAGAAATGGAGAGACGTTCAGGGAAGCATGGCGAGAGGCGTTCACTAGAGGATGAAAATGAGACTGAAGGAAAATTTAGAAATTTAACACCCAATTTATTTATTTATTATTATTGTTATTATTTTTCCTATTTTTTGTAATTTTCCACAAAAATTTCAAGTGTTGAAGGAGTTGAGGGGCGGGTGTGTTGGGTGTCGACGCTTGATGGAACTCCGTTTATGTCCGCCGCCCTATGTCATCGGAGACGGCGTTCGACTCTTCTTACACCCCTTTAAACGCCTTCACGCCTTCCGTAGTTACCCTTTCGTGCCAAATTTGCAGGTCAAATGTA…
Novel_G000348	Novel_T008646	ATCTTCACTTCACTTACCATGGCCTCCTCCAACTCCAAACAACTTCACAAAAATCTTCATGAAACCCAATGGCTTCTTCAAATCACTCAACTTATTGAACCAAATAACCTTCAAACAGCCTTACAAACTCCCACTTCAATCTTTAAGCTGCCCCATTCCATCACCAACAACAACCCACAACTTTACTTCCCTCGCTATATTGCTTTTGGGCCTTACCATCATTTCAGAAATGACCTCTATCAAATGGAATTACACAAGCTCCATAATGCAATCAACTCAACACACTCTTTCCAACTTCCTCAACTCGACCAAATTGTTCAACAACTCAAGAAATTAGATATCAAAATCAGATCTTGTTTCGATAACTTTCTTGAAATTGGGTCTGAGGCCTTGGCTTGG…
Novel_G000349	Novel_T008647	CTTCAAGTTTGAATTTTGAAGTTATAAGTGAATTTTCTTCCCATTTGCATCTTCACTAAACCCTTCCCTATTTTCACTATCTTCTTCTTCATATTCTTCTTCATCTTCCACCAACACCACCCGGAATCTCCTAAAATATATTCTTTTTTATATATATATATAGGATAAAAAAAAATTGAATTGTTTTTCAGCTAAATCTTTGATTCTGTCTATCCAACAAAATTTATGATTTTTTACCAACCCCAGATATTCTCTTCTATTTCAAATATTTGTTGCTTCAAAGCAATGGCTTCTCTACTCTCCTTCTTCCCCTATTTAAACACTTACAATCACCTGAATTTTCTGTGTGATTATCATTTTTCAAAATGGGTTCTCATTTTTCAAGCTTTTTCTTCCTCC…
Novel_G000350	Novel_T008783	CAGTGAATTACCGAATTTCATTCATTCGCCAAACGGAGGGCGTTAAAGTATGGTCGCGAGGTCTCTGTGGCGCGCCGGAGCGAAGGTTGCCATGGCAGCCACCGCAGGCCCCCCCCCGCCATAGGCGGTGGTGCCGCAGCTGCCTCCATAGCCACCTCCGACGACCCTTCTATGGCTCTTAAGCTATGCACCACCGTCCCACTTCGTCTCCTTCGCCTTTCATTCACAGTTGCTACCATTGCCGTCGATTACGAATATTCATTGTGGAGATCTCCTGAAGGGAGTAGCGAGAGGGAAAAAGTTAAGCATGAAGTTCACCTTAGATCTGCACGTAGAATTCAAGAGTTATGCTTCAAAAATGGAGGAATATATATCAAGCTTGGTCAACATATTAGTCAG…
Novel_G000351	Novel_T008853	TTACAAAATAGTTTTATAATTAAATAATAAAAATAATGGAGGGGTTATTTGACTGCTTGGGGAAAGGTGAATAAAGAGGGGAAGGGCCGCAGAGTCATTGATTGGGACGTCAGGAATAGAATACATACACACTTGACACTATACTATACTGAGGTATTTAATTTCTTTTTCTTTTTTTATTTATTTCGGTCAATCAATATTTATTTTTCTTTAACATTTTGGTTATTTTTATATACCCACTTCTTCTCTTCTTCTTCTTCCTGGAGATTTGTGTTTAGGCAAAAACCTTTACGGGAGACTCTTCTTCTGTCTCTTTCTTTCTCTTTGCTTCTGAGGTCTATTTCACTGTATTTCTGCAGAGCCCTTAGGGATATAGATAATAAGTTTTAACTCTTCCTT…
Novel_G000352	Novel_T008858	CCTTTGGTGATTTCTTGGCAATTCCGGTTTAACCTCAGCCGTTGACGAAGACCTCTGTTGCCCGCCAAATACACACTATCCTCATTTTGGGGGAGGAGAAGAGGAGCCGATTAGGGGGAAGCTTGAGGAACATGAAAATGGAGACCAATGCTTCGGACCCTAAGATTATTTTTTAGAATGTGACCCAGACTCCTAAATCGAACCATTGTGTTTCAAGTTCCTAGAGTTAGAATCCAGCTAAAATCACCAAAAACGCGTTCTCATAAGAAGACAGAGTGTTAGTGTTCCTGTTTCGAAAATTGTTTCCGATCTTAGGCCCAGAAAACGATTAAGAAGCTCGTTTACCTGCTCGTTAGAACTACGGCGAGGAATTTTAGTTCTTCGTTTGAGGTTCGTCTC…
Novel_G000353	Novel_T008859	CTCGCACATCCTAAACGCTTATTCAAATCTTGCCTTACAAGCTTCATCTCCAACGCGTCGATGGCTCGCACCAAACAAACAGCCCGTAAATCCACCGGCGGTAAGGCTCCTCGGAAGCAATTGGCTACTAAGGCCGCTCGAAAGTCGGCTCCTGCGACTGGAGGAGTAAAGAAGCCGCACAGATTCAGGCCGGGGACAGTGGCGCTGAGAGAGATCCGAAAGTATCAGAAAAGCACGGAGCTTCTGATCCGAAAGCTTCCATTCCAACGGCTAGTTAGGGAAATCGCTCAGGATTTCAAGACTGATCTTCGGTTCCAAAGCAGCGCTGTTTCGGCACTGCAGGAAGCGGCGGAGGCTTATCTCGTGGGATTGTTTGAAGATACTAACCTGTGTGCGATT…
Novel_G000354	Novel_T008882	GGCTTTTCCTGATGCTCTATTTCATCAGTTGCTTTTAGCAATGGCTCACCCTGATCATGAGACTCGAATTGGGGCACACGACATTTTCTCTATAGTGCTTATGCCATCCATTAAGTGTCCTATGATGGAACAGAAGACGATTTCCTCAGACACTGTTTCATGGTTACCATTTAGCAGTCCCACACAGAAGTTGACTAGTGGAGGTTTCTCCTTTAAAGACGATGACAATCATGTATCAGAATCTATAAATGGGAAGTTGAATTCCCTCCGGTTAAGCAGTCACCAAGTTAGACTCCTGCTCTCCTCAATCTGGGTGCAAGCTACATCTGCGGATAATACACCTGCAAATTTTGAGGCTATGGCTCAAACTTATAGCATTGCTTTGCTATTTACCCGGTC…
Novel_G000355	Novel_T008883	GGCTTTTCCTGATGCTCTATTTCATCAGTTGCTTTTAGCAATGGCTCACCCTGATCATGAGACTCGAATTGGGGCACACGACATTTTCTCTATAGTGCTTATGCCATCCATTAAGTGTCCTATGATGGAACAGAAGACGATTTCCTCAGACACTGTTTCATGGTTACCATTTAGCAGTCCCACACAGAAGTTGACTAGTGGAGGTTTCTCCTTTAAAGACGATGACAATCATGTATCAGAATCTATAAATGGGGTAAGAATGGAAGAAAGTCAAGCAGCACACCTTGTTTCTGAAAATTATACAACACATCCATCTAGGCATGAATCCTCCAGCTTCAACCATAGTTCAAACGAGTCAAAAACTAAGTTGAATTCCCTCCGGTTAAGCAGTCACCAAGT…
Novel_G000356	Novel_T008884	AAATCACTCTCTGTAAAAAGAAAGCGAGTGCGATCCCTTAATTTCCGGGACCGTTGGGACTTTGTCATTTTCATATTAATTTTTCCTTTGGAATTTCATTTCATTTTTTTTTTCCCCCTTTTGTTTCCTTTTTTCTTTTTTCTTTTTTTAAAATCTCGCCATTATTGTTTGGCAAGAGGGGAAAAAAATTGATAGATTATAGTAGTACACACGCCCCCTGGTGGGGGGAGGATTTTGCATTTCTATCTCTTCTCCCCATTGCGCCATTTTCATGGTGCTATAGATCACGGCCGCAGTAGCTTGATCGGAATTCCCCAATTGAAGAGTTTGATTTCTTATTGGTTGATACCCCTTTACTTGTTTGTGCTTCTATTTCAGTTGGAGTAGGTTTGAATTTCA…
Novel_G000357	Novel_T009037	TTTTGTTCTTCGAGTTTCTGAAGTTCAGCTCCTCCAACAATGGCTCCCAAATCATCAAAACTCATCGAGCGCTTCCGCTACGATCTGCTCTTGGGATTCATAGTCGCATTTTATGCCTTCATGGTGCCTTACACTAAAGTTGAAGAGAGTTTCAACGTTCAGGCAATGCACGATATTTTATATCATCGGCAGCATATCGACAATTACGATCACTTGGAGTTTCCCGGAGTGGTTCCTCGCACTTTTATTGGTGCACTTTTTGTATCATTTCTAGCATCTCCATTTGTACTGGTCATAAACTTGCTCCACTTGCCCAAAATATATGGACTTTTAGCAGTTCGCATAGTATTAGGCTGTGTTGTACTGTCAACATTACGTTTCTTCCGTATTCAGATAAGG…
Novel_G000358	Novel_T009038	TTTTGTTCTTCGAGTTTCTGAAGTTCAGCTCCTCCAACAATGGCTCCCAAATCATCAAAACTCATCGAGCGCTTCCGCTACGATCTGCTCTTGGGATTCATAGTCGCATTTTATGCCTTCATGGTGCCTTACACTAAAGTTGAAGAGAGTTTCAACGTTCAGGCAATGCACGATATTTTATATCATCGGCAGCATATCGACAATTACGATCACTTGGAGTTTCCCGGAGTGGTTCCTCGCACTTTTATTGGTGCACTTTTTGTATCATTTCTAGCATCTCCATTTGTACTGGTCATAAACTTGCTCCACTTGCCCAAAATATATGGACTTTTAGCAGTTCGCATAGTATTAGGCTGTGTTGTACTGTCAACATTACGTTTCTTCCGTATTCAGATAAGG…
Novel_G000359	Novel_T009055	GTTTTGAGCCTCCACAATCAGCAACTAAGCGGCAGTCTCAGTTCTGCCACCAAAATGCCGAAACAAATTCATGAGATCAAAGATTTCCTTCTCACTGCTAGAAGGAAGGATGCTCGTTCTGTGAAAATTAAGAGGAGCAAAGATGTTGTGAAGTTCAAAGTTCGATGCTCCAAATATCTTTATACTCTTTGTGTTTTCGACTCGGAGAAGGCAGACAAGTTGAAGCAATCTCTTCCACCAGGTTTGAGTGTGCAAGATCTGTGAAAGAATGGTTGAAGTGTCGAAGGATCATAAGGATGAGAATTAGATTTTTTGTATGATGTTTTTTCCCCCTAACTATTTAGAATATATTTAAATTGGATTTGAGCTTGTAGTAATCCATATTTATCTTCGGTTTTG…
Novel_G000360	Novel_T009056	AGGGAAACAATCTGGTGAACAGAAAGATATTGGGAAGAGAAGGGGGAAAAATTGCTCCAACATGCACATTTTGGATGACAATGAGAATGACAAAGTAAATAATGTTGACAAGGGCAATTTATCTCGGAAAGCCAGGAGAAAACAACGTCAAGCTGAGCTTAAATTGTCTCACTTTAGGAATCTGGCATACGGCAAGACAACCTTGAAATCTAAGAAAAAATCAAAACACTGATCATCAGCCAGATTCTGATAAGAATAGGCATGCTATGAATACGATTGTTCACTTGATAGCTCAATGTTGCTGGATGAATATTCATATTGTTGCACCACATGGGATCGTTTTTGAGATAAGGATAGCAGAAGGGTATGGTGCCAGGTGGTCAAAAGATGGAAACAAGT…
Novel_G000361	Novel_T009091	GAACAGATGACTTGGTAGGATTTATATATAAGTGTGGTAGAGGTTGAGAGCAGAAAGAGAGAGGTGTCCTAAATTTGGTTCGTTACGTGGAAGAAGAAAGTAGAAGAAAGAAGAAGAAGAAGAAGAGAAAAATATATATAGATATAAAAAACAGTAAAAATGTGGAGATTAAAAGTGGGAAAAGAGAGTGTTGGGGAAAAAGAAGAGAAATGGATTAAGAGTATAAGCAATCACTTGGGACGTCAAGTTTGGGAATTTTGTGCTGAAAATGATGATGATGATGATGATGAAGCCGTTATTCATGTTGTTGCTAATTCTTCAAAGCACTTATTACAACAACAACGACGACAGTCGTCGTTTGAGAATGCTAGGAAGCAGTTTCGTAATAATCGTTTCCAT…
Novel_G000362	Novel_T009154	TTGAAGCCCAATTTCGGTGGTCGATCAGAGTCAAGCTTCTGCTGGGGATTTCAATCTTCTCTTCCAATTTCCAATTTCTCAATTCTTCTCATCTCGATTTATCAATCCCACCCAGATTTGAGATCATGGTTTTATCCCAGAAGCTTCACGAGGCCTTCAAAGGAACTGTTGAGAGGATCACCGGACCTCGAACCGTCTCCGCTTTCAAAGAGAAAGGCGTTCTCAGTGTTTCTGAGTTCGTCATCGCCGGTGATAATCTCGTCTCCAAGTGTCCCACCTGGTCTTGGGAGTCGGGTGATCTGAACAAGAGGAAATCATATCTGCCCCCAGATAAGCAATTCTTGATTACCAGAAATGTTCCTTGCCTGCGACGGGCTGCCTCTGTTGAAGAGGAGTATG…
Novel_G000363	Novel_T009155	TTTCTCCGTTGAAGCCCAAATTTGGGTCATCTCCCCCATTGAAGCCCAATTTCGGTGGTCGATCAGAGTCAAGCTTCTGCTGGGGATTTCAATCTTCTCTTCCAATTTCCAATTTCTCAATTCTTCTCATCTCGATTTATCAATCCCACCCAGATTTGAGATCATGGTTTTATCCCAGAAGCTTCACGAGGCCTTCAAAGGAACTGTTGAGAGGATCACCGGACCTCGAACCGTCTCCGCTTTCAAAGAGAAAGGCGTTCTCAGTGTTTCTGAGTTCGTCATCGCCGGTGATAATCTCGTCTCCAAGTGTCCCACCTGGTCTTGGGAGTCGGGTGATCTGAACAAGAGGAAATCATATCTGCCCCCAGATAAGCAATTCTTGATTACCAGAAATGTTCC…
Novel_G000364	Novel_T009230	ATTTAACTTTGTTTTCTTCTTTTGAAGTTCCATTTGGTCTTCTTTTTTCTTTTGTCATATCTATGTTAAGAAGAATCTGTTATGTTTAAAGAATATTTATGGGCCATTACTTTCTTCTTCTTGTGAAGGATATACCTTCTTATACACAAACTTAGGCACTGCCATAGCCTACTTTTCATGATTTCATTCCTTCACATACTCGATATACTCAACCTCTTCAATTCATTGTTTGTGATTTGTGGGGTATGACTCATAATTTGTCTCGGAATAGTTTTTGATACTATATTGGTTTTATGGATGTCAATAGTCATTATCTATGGATTTTCTTTGATCTCCAATCCAAATCTAAGGCCTTTTTCGGCTTTTCTTAAATTTAAAAGTCTGGTTGAAAGTTTGTTG…
Novel_G000365	Novel_T009231	NNNATTTAACTTTGTTTTCTTCTTTTGAAGTTCCATTTGGTCTTCTTTTTTCTTTTGTCATATCTATGTTAAGAAGAATCTGTTATGTTTAAAGAATATTTATGGGCCATTACTTTCTTCTTCTTGTGAAGGATATACCTTCTTATACACAAACTTAGGCACTGCCATAGCCTACTTTTCATGATTTCATTCCTTCACATACTCGATATACTCAACCTCTTCAATTCATTGTTTGTGATTTGTGGGGTATGACTCATAATTTGTCTCGGAATAGTTTTTGATACTATATTGGTTTTATGGATGTCAATAGTCATTATCTATGGATTTTCTTTGATCTCCAATCCAAATCTAAGGCCTTTTTCGGCTTTTCTTAAATTTAAAAGTCTGGTTGAAAGTTTG…
Novel_G000366	Novel_T009256	TGAAATCTCTCTACTCCAAATTGAGTTCCCTTCTCCCATCCCATCAATTAAATGATCAGTTGCCACGGACAGTTTCAGATCAGATAGAGGCAGCAATAAATTACATCAAATCATTGGAGACTAAGCTCAAACAGGATGAGGAGAAGAAGGAGGGATATTTAAGAAGATCCAAAATGGCTTCGCCCTCCACTGCCTCATCCTCATCGTCTTACTCGGCATTACCGATAACCCATAATAGGAACGTACCTGAATTGAAAATCAAAGAGATGGGCCCTGCTGTGGAGGTTGTTTTAACGACTGGATTGGAGGATCGCTCTTTGTTTTATGACACTATTCGTATCCTTAACGAGGAACGAGCTGAGATCATCAATGTCAGTTATTCTCTTCTTGATAACACAA…
Novel_G000367	Novel_T009297	GGTAAAGGCAATTAGCCCAAATTTCTCTAACACTTCCAAACAATTCGCCCTTCCTTATCTTTGTTACGAAGAACGTCCGAAGAAACAACTAAACGATGCAGATCTTTGTCAAAACCCTAACTGGGAAGACGATCACGCTCGAAGTTGAGAGCAGTGATACCATCGATAATGTCAAAGCCAAGATCCAGGACAAGGAAGGTATTCCTCCTGACCAGCAGAGATTAATTTTTGCTGGTAAGCAATTGGAAGATGGTCGAACGCTTGCAGATTATAACATTCAAAAGGAGTCAACCCTTCACTTGGTTTTGAGGCTTAGGGGAGGTACTATGATTAAGGTCAAGACACTGACCGGGAAGGAAATTGAGATTGACATTGAGCCAACTGACACAATTGATCGTA…
Novel_G000368	Novel_T009334	GCATATAATTGTAGGTCTCAAGGAAAGACCTGCGTTGGTTTCCATTTGTTAAGGGAAAAAGAGATATCAAGAAGAAAAGAGATGGGAAGAGCTCCTTGTTGTGACAAAGCAAATGTGAAAAAAGGGCCATGGTCACCTGAAGAGGATTCTAAGCTCAAACATCACATTGAAACTTATGGAACAGGTGGCAATTGGATTTCCCTTCCTCAAAAAGCTGGTCTTAGAAGATGTGGGAAGAGTTGTAGATTGAGATGGCTTAATTATCTTAGACCCAACATCAAGCATGGTGAATTTTCAGCTGAGGAAGATAGAATCATTTGTACTCTATTTGCCACTATTGGCAGCCGATGGTCAATTATTGCTGCTCAATTGCCGGGAAGGACCGACAACGATATAAAG…
Novel_G000369	Novel_T009414	TTTTTTTCTTCTTTTACTTCATCTCACCAAAGATTTCAACCACGGAGTTCCCAAATCAAAGTGGAGAAGGATCTGCCTCTTCCCAAAAAAAAATGGGAAGAGGTAAGATTGAAATAAAAAGAATTGAAAATACTACAAATCGTCAAGTCACCTTTTGCAAGAGAAGAAATGGATTGCTTAAAAAAGCTTATGAGCTGTCTGTTCTTTGTGATGCTGAAGTTGCTCTCATCGTCTTCTCTACTCGTGGTCGTCTCTACGAATACGCAAATAATAGTGTTAGAGGAACGATTGAGAGGTACAAGAAAGCATTTGCTGATTCTTCCAATTCCGGATTATCAGTTGCCGAAGCTAATGTACAGTTTTACCAACAAGAAGCCACCAAGTTGAAGAGACAGATTA…
Novel_G000370	Novel_T009474	CTGCCATCCAAGCAACTCCCACAAAATACAATCCCCAAACCCCAAATTTCATTTTTTTTAATTTCCTTATTCTTCACCTTCCCTTTCTTAATTTAATCACTTGTTCATCATTTTGGATTCTTTCTTATTTTAAAATTTTACAATTTGGGTTGCATCTCTTGATTGTGGCTGCTCCTTCATTCTCTTTCCTTTCTAAAGGCCTCAATTTACAGATTCTCTTAAGTGATTTGAGTTCTTGTTTGGGGGATTTCAACGATTTCTGTTCATGGAGTTTTGGAATTTGGATTGTGGAGTGGGGGGTTTTGGTAATTAATTAATGGTAGAGATTTGAGATTGTTCCCAATTCAAAGGGGAATGACTTCTTTTAGTGGATTGGGAATTGGGTTGAGTTTAGTTTTT…
Novel_G000371	Novel_T009506	TTTGGCAGTGGCTTTTTAAACTCAAGGAGGTTTGTGTAAGACCTCCAATTATTCATACATATCAAAGGAGGGGCAGAAAAGTAATTGGACAAATTAATAATGAGGAAGGAAAAAGAGGAGGAGATCATGCAGGTGGGGCCCAAAGGTGAACTTGGAGCCCCGGGGTATTGTAAGACCTCCAATTATTCATACATATCAAAGGAGGGGCAGAAAAGTAATTGGACAAATTAATAATGAGGAAGGAAAAAGAGGAGGAGATCGTGCAGGTGGGGCCCAGGCACAGAAATAAGAGAAAGATGAGAGAAGGAATATAAATAGGTTTTTTAGGTCTAGGGGAGGTAGGTTTTATTTTTATCCTGAAGTTGGCGGCTGCTTAGCCTAGAGGAATATCCAGTCTTT…
Novel_G000372	Novel_T009507	TTCGACTTTTAATTAGGCAACCAACTTATCTAAACTTACAGCAGGTTTAAAGTTGATCCCAATACAACCTTGAATGGAAATTTGCACAACTCAATTCCTCAAACCACACCTTAACCTTTAAACAACATAATTCAACTCATTCCAGCGCTAACTCTTTTAAGACCGAAAACAATAATTATTTGCGCATACCAAACCCAACCAGAACTAACCAAAACTCACTAAGGGCTCAAATATATTGCAGACGACTAAAACTGAAGGTGGCTCGGCTAGCAAGGGCTTCGGCTCGGGTCTTGGACTTCCGGCTCGCGTACGGCTTACATAAGAATGGCTCGATACACGTGGCTCGCGTATGGCTTACACGAAACTGGCTCAGTGAGTGTGGCTCGCGTACGCTCACAC…
Novel_G000373	Novel_T009510	CAAATTAAAAACCCTCATTCCTCCCACGAAGAAGCCATCTCCAAATGCGAAGAAGCCATCTCCAGACGTGAAGAAGGCAATCTCTGGACGATGCCCGTTCCCGTCACCGCCCTCTCATTCTCGTCTCTTCACTTTAGCGCCACCGCAACCTTCTCTACCGGACGACAAAACCTCTTCTATTCTAACCTATTCAATTCGTGTCTGTCATCTCCAATCTGTCGCAATCTCTTCAATGTTCAAATTGTTGCCGTCACCTCCTCTGCCGATATTTGTTGGTGGTCTCGATTATGATGTTAGTGATGAAGATTTAAAGCAAGCTTTCTCTAAATTTGGTGACGTTGTCTCTGTGAAAATTCCAATTGGAAAAGGATGTGAATTTTTGCAATTTACTAACAGATG…
Novel_G000374	Novel_T009523	CATCATATAATAGGATGATTCATCTGACCGGGAGATACGGAGAGATGCCGGGATGTTAGAATGTTTCACGATTCTTCTTCTTTCTTCCAAATTTGCGTTAAGTGAGAGTGTTGCATTCAGTTACTTAGCTTCATCAATGGCATTGTGCGGAGCGAGCCAGCAGCTAGCTTTAATATCTGGCGGCAACGGGCATCAGAGAAGAGGAAGAATAAGTAGAAGCAACAGGGGTCCGATAAAAGTTCAAGCATCGACGAGCTCTGAACTGGGGGTGTATGAAGAGGGCCGATTGGAGCGGCCCGATTGGTCTGGACAGACCCCTTTGTCTCGCCTTGTCGGTGCTCTCATTTCCTTCAAACCACTCTATTCCATTCTCAAGCTCGGTGCCAGACAAGTTTTAAT…
Novel_G000375	Novel_T009524	CGGCTGTACATACCTTTGGTGTTGATCGACGACCCCTAACATGCTCCACTGTGCCCCTACTCGGCTTCCCTTCAACATTTTAGTGTAGCATCTAATGCATTAATGGCCATTCGATCGGAACAACAGTGTAGTAAAATTGTTCTTGGACCGACAAGGGTTAGGAAGCGGCAACGGTTCATCGACAAACCAAAATATGGAAAGATGGAGAAAGGATGAGAAACATTTCAAAGGTAACGAACGTTCGTTGCAATCGGTCGACGAAACGCATCGGAGAGAGGATGTGATCTGTTTTGTAGGCAACATCGTCAAAATGCAACTGTCACAAAATGAAAATGGGTTTCAAGAGATCAATGACATAAAATCGAGGAGAGTAGGGAAAAATCAAAGACAAACAGAAGT…
Novel_G000376	Novel_T009527	TTTTTATGCAGGTTTCAGTATGGCTTCGACATCAACTAACGGTCCCATGTACAAGATTGACCCTGCTCATCATTTTCAGTCTATAGTAAGTAGTTTAGCACATTTAGAAAACAGTACACGTACAATAAAGGCTAAATTGAAACCGGATCAATTAACCTTATTTAGAAATACAAAGTTCGGCCACTTTTTGGATCTGAATATAATCTTTAATGGGCCGCTCATCCACTACTTATTGTTAAGAGAGGTGGAAGATGAAAGGGTTGATCACATAAGTTTCAAGATAGGAGAAGTCGTGTGCAGTTTTGGAAGGAGAGAATTTAATATGATGACGGGTCTATGGAGTTCTCAACCAGAGCCTATTGATTTGGTTGGGAATAGTAGGTTGTTAGTCAAGTTCTT
Novel_G000377	Novel_T009528	TCCCAATTTCGCATCGTCTTCTTCTTCGTAATTTCCCAATTTCGAATCGTCTTCTTCTTCTTCACGGCTCAGTATTCAAAATCTCAATCTTCTTCTTCACGCTTGAGCTTCTGAAATCTTCTTCTCCACGTCGTCGTTCGTCACGATGTCGTCTCTTCACACTTCTCCGTCTTTGAAAAGTAACCATCAATTCTTCACTCCACTCGTCTTCGCCGTTCTTGACGTTGGGGAAGCCCTATCCCACGCCCGTTCTTGAAGACATTCGAAATTTGTTTTCACACTCGTTCAAAATCACCATCGGGGATTAATTTCATCTCTACACGCCTATCTCTTCGCACTCGATCTCTTCATTCTGAAAAATGCACTGATTGAAGTCCTCCAAACAAACACATTTTGTTT…
Novel_G000378	Novel_T009529	CTTTGCCCTAAAAATCCCAATTTCCCAATTTCGCATCGTCTTCTTCTTCGTAATTTCCCAATTTCGAATCGTCTTCTTCTTCTTCACGGCTCAGTATTCAAAATCTCAATCTTCTTCTTCACGCTTGAGCTTCTGAAATCTTCTTCTCCACGTCGTCGTTCGTCACGATGTCGTCTCTTCACACTTCTCCGTCTTTGAAAAGTAACCATCAATTCTTCACTCCACTCGTCTTCGCCGTTCTTGACGTTGGGGAAGCCCTATCCCACGCCCGTTCTTGAAGACATTCGAAATTTGTTTTCACACTCGTTCAAAATCACCATCGGGGATTAATTTCATCTCTACACGCCTATCTCTTCGCACTCGATCTCTTCATTCTGAAAAATGCACTGATTGAAGTCC…
Novel_G000379	Novel_T009533	AAATTCTTCATAATAATGGAATTTTGGTTAAACTTTTGATGAGGATTATAGATATTCACTGATATACTGAGAATATAATTTGTTGATGGCATATTGGTGGCCTCTGAAACTTGATGAAGTTCAAGATGTGCGTATGTCTTATTTTAACTAATATATTCCATAACCCAAAAACTATGTGAAAATGAACGTTCTTACTACTTGGGTGATTTAACACATAAGTTTTTAAGCTTGAATGAATGTACAAGAAAGTGTTCATACAATGAACATTGAAATTGTGTTATTTTGATGATGTGTATCATTTAACAGCTGAAATGTTTCTTATTTGTTGTTGAAGGACCCTTCTAACAAAAGGAGAATAATTTGTGAGGAGAAGTTAAAAGAACTTTTTGATGTTGATTC…
Novel_G000380	Novel_T009596	CACAAGACCAATGTTGTCGGCACATTGAACATGCTAGGGCTTGCGAAGAGAGTCGGCGCCCGCTTTTTACTCACCAGCACCAGCGAAGTCTACGGCGATCCACTCCAACACCCGCAGGCTGAAACCTACTGGGGCAACGTCAATCCCATCGGTGTACGAAGCTGCTACGATGAAGGAAAGCGGACGGCGGAGACTTTGACAATGGATTACCACAGAGGCCTTGGCATTGAGGTGCGGATCGCTCGGATCTTCAACACTTATGGACCACGGATGTGCATCGATGATGGTCGAGTTGTGAGCAATTTCGTGGCACAGGTACGCTTTTCTTTGTTTATGGT
Novel_G000381	Novel_T009631	AATACCCCTTCAACAATTCTTGTTTCTTCCTGTCATTTTTGTTCATCTATTGAATCAACTAACCCATACATCAAAATGGGATCTTGCATTAGCAAATGCAAACCCAAGATGATGAAACAACCACCTCTTTTTGATTTCAACAATCTTGTTGTTCAAGACAAACTTGTTGTAATTCCTCAACCACTTTCTCCATTATTGACAACAAAAACAACATCAGCAACTCCTTCTCTTTCTCTTCATAACAAAATCTCTCCTTATCCTCCTTCTCCTTCACCTTCTTCTTCTTCCATTTCTTCTTTCACTTGCCTCTCTTCAAATACACCTTCTTCAACCAACACCTCTTTCTCAACTGCATCTTCTTCACCTTCCCCAATTTCCTCACATCATTACTTTCCTTCT…
Novel_G000382	Novel_T009672	CTCAAGTGTACACCTGTTAGAGCGGGAACCCAAAAGTTTCTCCAAAAACAATGCCTCTGCAAGTCCATTTCTTCTCTGCCTCTGTCTCTGTCTTGTCCATTCTCTGTTCTTAGGGTTTCAATTTCAGTTTTCCTTTGTTTCAAACCTGTTGATTTTGCTTTCTTTCTGCTCACGGTTTCGCTTTAGCTGACCCAAAATGAGCCTACGCAAGGGCTCTAAGGTTTGGGTGGAGGATAGAGATTTTGCTTGGGTGGCGGCTGAAGTCCTCGACTTCGTTGCTAAACAAGTTCGAGTTTCAACTGCTACTGGAAAGAAGGTGTTGGCTCTTCCTGAGAAGCTGTTGCCGAGGGATGCGGATGAGGATGATCATGGTGGAGTGGATGATATGACCAAGTTGAC…
Novel_G000383	Novel_T009673	GTTTGTTTTGTTTTGAGAAACTCAAGTGTACACCTGTTAGAGCGGGAACCCAAAAGTTTCTCCAAAAACAATGCCTCTGCAAGTCCATTTCTTCTCTGCCTCTGTCTCTGTCTTGTCCATTCTCTGTTCTTAGGGTTTCAATTTCAGTTTTCCTTTGTTTCAAACCTGTTGATTTTGCTTTCTTTCTGCTCACGGTTTCGCTTTAGCTGACCCAAAATGAGCCTACGCAAGGGCTCTAAGGTTTGGGTGGAGGATAGAGATTTTGCTTGGGTGGCGGCTGAAGTCCTCGACTTCGTTGCTAAACAAGTTCGAGTTTCAACTGCTACTGGAAAGAAGGTGTTGGCTCTTCCTGAGAAGCTGTTGCCGAGGGATGCGGATGAGGATGATCATGGTGGAGTG…
Novel_G000384	Novel_T009685	CTCATGTGCAAAAGAAGCTCATCGTTTACGTTCTAAACTATTCAAAGAGAAGTTTATATACACTGTTGAGCAGCATCTTGAAAAAGATTGTGAAATGGCTTATATTAGTCAGAAGCCTGCATATGGCATTAAGAATCTCCAGAAAAACAGATCGGCTGCTCGTGATGTGTGGTCATTTGATAAAATATCATGGGATGTAGAAGGTTGCTATCTTAGTCCTTTTAATGTACTTCAGTGTTATCTTGAAAGCACTCTTCAGGTTGGTCTTGTTCATGAGATCATTGGAAATGGCTCTGAGGCTGAAACACTTTTAATGTGGGGAAAAAGTATCTCCTGCTTGCAAAGCTTGCCACTGTTTGAAGTTGCTTTCTCTTCTGCTTTAGGAAAATTATATAGGAA…
Novel_G000385	Novel_T009686	CTTTTCCATCCCTTTTAGGTGGTTGGGAGAGAGGAAAAACTACACCAATTAAAAAAGAGAAAATACATTTGTCCATTTGGAGGGGCATAAATTCCAAAAGTCTGTTTCTTCCCAACTCCCAAATAAAACATTATAAAATCAAAGTTGAAAATACAAAGCCAACCCATATCCCATCTCCATCATCATCATCTTCTTCATCTTCTTCCATGGATGATGATAGGAGAAGCTCTTATGGAGGAAGCTCATCCATGGAGATAGAGAAATATTATGGGCCATCGTCAAAGAGCCAAGTTTCTGTGAAGAAAGGGAAAAGCACTTCTGGGTCATCTTCAAAATCATGGAGATTTGTTGCTGATCCTGAGTTTCAAAGAAAGAAGAGAGTAGCAAGTTACAAGATGT…
Novel_G000386	Novel_T009705	GTAAAATTGAGCCCTAAACATATGTATGTATCTTCCTCTCACTTTCAAGTCTCACGTGCTTCACCTTCCGTCTTTAGCAGCTCAGCTCCGCCGCTGCCACTTTCCAGTTCGTTGTCGCCGCCGTTCTTCCGCTCGTGCCAGCGCCGCATCCCTCCTAACGGATCTTCACTGATTTTCCACTCGGTTGTTGCTACTGTTGGAACTTCTCTGCTTGGAGTTCTCCATAAAATGGCGTTGGTTGTGATCTGTGGCCAGCCATGCAGTGGGAAGTCCACTGCTGCACTCTGCTTAGCTGAAGCTCTCAAGGAATCAAATGTAAAAGAAGCCATTAAGATTATCGATGAAACTTCTCTTCATTTGGATCGGAATCAGAGCTATGCCAACATGCCTGCTGAAAAA…
Novel_G000387	Novel_T009725	AAATTTAAAGAGGGAGATATAAGGAAGGAAGGAAGGAAGAAAGAAAAGAATGGGAAGGGGAAGAGTAGAGTTGAAGAAGATAGAGAACAAAATAAATCGACAAGTTACATTCACAAAAAGAAGAAATGGACTTCTTAAAAAGGCTTATGAGCTCTCCATTTTGTGTGATGCTGAAGTTGCTTTGATCATCTTCTCCGCTCGTGGCAAACTCTATGAATTCTCA
Novel_G000388	Novel_T009740	GAAAATATAAAAAAGAAAAAAAAATGGTTGAATTGATTGTGCTCACCGACACGGAGACGGGAAGGAAAAATAAAAAAGGAAGAAAAATAAAAAAATAAGTGAATGTTGCGCTTGCGAGAAGGAGAGTTGGTGATTGCCTCGTGGCTTCCACTCAAATATTCCTACGGTGACTTCTTACATAGAGAGACAGAGGCGGAGGGGCCACGAACACCATTTTCTCTTCTTCTTTTTCTTATTTGTTTTTTACAATTTCATTTCGCTTTTCTCAACCTTCCTCTTCTTCTTCCATGTTTATGATTCAATAGGGGATTTTTATCTGCTGCTTTTTTCCCTTTTTTTTTTTTTTGAAGAACATTATTCATCAATTCCTTCCTTTCCTTCTGATTCTGCTCGCTTTTG…
Novel_G000389	Novel_T009772	TTTTAACCTAACTCTCCTCTGCGCCCTTCGTCTTCCCCAAATACTCCATCAAATAGCCAATGCAATCCATGCGACCCATCGTCTAGCTGTACCAATAACTTTATCTGTCTCTTCCTTCCAGCTCTTCCATGGCGTCTTCTTCTGGACTCCGTATCTCTTACCTACTTCGCCATCAGCTTGCTCCACCTCTCGTGTCCAATCGTTTCACTAGAACCTGCCTTGGGTTGTCAGAACTTCGCTTTTTATCTACCAAGAATTCTACAGCTTCCAGGTCCCTGCGGTTGGCGAAATCCGGGCGCAGAGACGAGCCTGTGAAAGATGAAGGGGATGACGGGCAGGATGGAAATGGCAGTGTAGCTGTGAAGAAGGATGGAGGTGGGAGTGATGGAAGGATTGTTC…
Novel_G000390	Novel_T009773	TTTAGCTTTTAACCTAACTCTCCTCTGCGCCCTTCGTCTTCCCCAAATACTCCATCAAATAGCCAATGCAATCCATGCGACCCATCGTCTAGCTGTACCAATAACTTTATCTGTCTCTTCCTTCCAGCTCTTCCATGGCGTCTTCTTCTGGACTCCGTATCTCTTACCTACTTCGCCATCAGCTTGCTCCACCTCTCGTGTCCAATCGTTTCACTAGAACCTGCCTTGGGTTGTCAGAACTTCGCTTTTTATCTACCAAGAATTCTACAGCTTCCAGGTCCCTGCGGTTGGCGAAATCCGGGCGCAGAGACGAGCCTGTGAAAGATGAAGGGGATGACGGGCAGGATGGAAATGGCAGTGTAGCTGTGAAGAAGGATGGAGGTGGGAGTGATGGAAGGA…
Novel_G000391	Novel_T009829	TTGATCCCCACAATTTCTTTCGTTTTCTTTCTTTTACTCCTCCTCGGTTTGAGCTGGAATCAGTTTGTTTATAGCCAGAATGTGGATGCCAATCAGCTTGCCAGCCCTGCAGCACTTCCATTTATCTTGTCGATTGCCAATGGTCAGCTCTCCAATTTGAGTTCAACCATTAACACAGAACTCAGTACCCGCTTCCGTTTTTGCTCCAGGGACACGAGATTTCACAAAGCGTCTGTGTACTGCAGCAGAAGTCAACTTTTACTTTGATAGTATCATTCTTCAAAATCCTGCAAGCGGTTCCTTCTTGAAACTCAACAAGAATTGCAATTTGACATCATGGGCTTCTGGTTGTGAGCCAGGATGGGCATGTAGTGTGGGTCCTGATCAGCACGTTGACCT…
Novel_G000392	Novel_T009830	ACCAAGTCTGTCAAATTGGCGTCTAAAAACCTCCCTAATGGCAACTTGTTTACCTGAAAAAACTTACAGCCGCCTCCTTCGTGACCCCACGTTCCTGTCTTTCTCTCTCAATCACCAAACTTTCCTCTCTTGACCTCTGACGGCCATGACCAATATGGTCGTTGAGCTTTTCAAACTCCATCCTACAAAACCCATTTCTCCGTTTTCTTTAGATCTTCATATTTCTCTTCTGACTTCAATTTTTTTGCTTCATATCTTCATATTTCTTCTAAAGCTATGAACTTGATCCCCACAATTTCTTTCGTTTTCTTTCTTTTACTCCTCCTCGGTTTGAGCTGGAATCAGTTTGTTTATAGCCAGAATGTGGATGCCAATCAGCTTGCCAGCCCTGCAGCACTT…
Novel_G000393	Novel_T009835	CTCCAATCGTATAAACACGAAAGCGAGTTCGCGAATTCAATAAACTGTTTCACAGAACAAGAATTTCCATTCAAGAAATGGTTTCATTAGCATCTTCTTCACTCTTACTTCTCTCAAAACCTTCGTTAATCTTCAACCCCATTCGCGCCATTCCTCGCATTTCATGTTCACTTTCATCCAATTCCAAACCCAACGCCTCCTCTTCATCTTCATCTTCATTGGAGTTCAACATCACATTCGCTCCCCCGAAACCCAAGCCCAAATCCGAAGTTGAAGACCCTTTTCAGTTCATCGATCGAAATTCCGGCGGTCAGCTCTTCATTCCGTGGATAGTTCGCGGCGAAGATGGGAACCTCAAGCTCCAGTCTCATCCTCCTACACGGTTCCTTCATTCCGTGT…
Novel_G000394	Novel_T009843	TAAGACAATATACTTGCAGAACTAAGCAAGTATAAGAGAGCTGAAGCATTATTCGGACAACCTTTAGCAATCAGACAAAGGGACAAAATATCTCCAGTGGAATGGTGGGATAATTTTGGACAATCAACTCCAAACTTGCAAAAGTTTGCTGTGAGAATTTTAGGTCTTACTTGTAGCGCTTCTGGATGCGAGCGTAATTGGAGTGTGTTTGAACAACTTCATAGCAAGAAACGAAATAGGCTTGCTCAAAGTCGTTTGAATGATCTAGTGTTCATCAAATACAACAGAGCACTAAAACGTCGATACAACCTACGAGATATTGTCGACCCCATCTCCTTGAAAGATATTGATGATAGTAATGAATGGTTGATTGGAAGATTGGATGACGATTCTGAGGAG…
Novel_G000395	Novel_T009884	AGTAAGGTTGCGAAGGAAGGACATCAATCAATCGTCGACGTCGACCGTCCGGAGCTCTCTTGTTCTTCGCTTCATAATTTGCATCTCTGTTCACCTTCTTCACCAAAATCGCCGTGAATTTTCCTTCAGCAATTTACAGGTCTCCCTCAATTCTTCGATGTTTCCTAGCAATGTCAGGTTATCTTCCACATGAAGTCTTATTTAACATTTTTCTAAATCTTCCTCCAAAAACTCTTATCCTCTGTTCATGCGTCTCAAAATCATGGCGCTCTGTCGTCGCTAATCCAATATTCATCAGCACCCATCGCAACCAATCTTTAACCTGCAACAGGAAACTCCTGATTCTCGGTCGGTATTATTATAATAGAACCGAGCCGAAAGTCCGGTATTCGCTTCATT…
Novel_G000396	Novel_T009938	GGGTACAAATGCTCAAAAGGTTTACTTTTTGATTTGTGAGAGAGGTCCAAGGGCGTTTTTCAGTGGAACAGTGCAGTTAATGCGCCAAAGTCTTAGGGATGGTTTTTCCTTGCAACATGTAGCTCGTGAGGCATCTCTTTACATAGCTCACCGGATAAGTATATTGAGCAACCTAAGATGTCATCTTGCAGTTTTTGTGGCTCAGGTCTTTATGGAAATTGACAAAATAGGGGCAGAGGCAGTGGATGGTCAAGAAAATTCCTTACCTTCATTGTTGGTTACATTGAATGGCTTATTTCTCGATCTAGAGGCATCCATTTGTCAACTGCATGCAACACCTCATATGGATTTTATTGATGACAGCGTTTCATTTCCTCTATTTGAAAAAGTACCAGATGT…
Novel_G000397	Novel_T009939	GTTTACTTTTTGATTTGTGAGAGAGGTCCAAGGGCGTTTTTCAGTGGAACAGTGCAGTTAATGCGCCAAAGTCTTAGGGATGGTTTTTCCTTGCAACATGTAGCTCGTGAGGCATCTCTTTACATAGCTCACCGGATAAGTATATTGAGCAACCTAAGATGTCATCTTGCAGTTTTTGTGGCTCAGGTCTTTATGGAAATTGACAAAATAGGGGCAGAGGCAGTGGATGGTCAAGAAAATTCCTTACCTTCATTGTTGGTTACATTGAATGGCTTATTTCTCGATCTAGAGGCATCCATTTGTCAACTGCATGCAACACCTCATATGGATTTTATTGATGACAGCGTTTCATTTCCTCTATTTGAAAAAGTACCAGATGTGAACAAGGAGGGATCACAG…
Novel_G000398	Novel_T009940	GTTTGCCGGTTCCATTAGTTACTTCAATACACTCAGCTGCCTCCCCAGTGGTTCGCTCATCCCACATAATAGTCACTAGCTATGGAGGTGGTCAGTTGCAAGGTTTGTAAACATCGAAAGCCAAGGAAACTAACTCAATACTGGCTTGGATATTCTTGTGGTGCAATTGGTCTTTCAATCTGTTCTGCTTGGCTTGTTCAACATAGTAGTTTAATGGGGAGCAATGACATTGATAATTGGGTTCGCGAAGCACATAATTCAGCAGCTAGTTTTTTCAAGGATCATGTAGAACAACCGCTTATTTCAATTAGAGATGAACTTTTTGATACATTTAGAAAGAGGCATAAAGGTGTGATGGAGGTTCAAGAGGTTCAGTTAACTGCTATCTCGCTGCACAGA…
Novel_G000399	Novel_T009941	GTCCCCACACCTCTGTATATGGATCGTAATCACTAAAGATTGTATTCCAATCATTTCGGAATTCATATGCTATAGACACATGTACAAGGATTATCTAAGGTTTGTAAACATCGAAAGCCAAGGAAACTAACTCAATACTGGCTTGGATATTCTTGTGGTGCAATTGGTCTTTCAATCTGTTCTGCTTGGCTTGTTCAACATAGTAGTTTAATGGGGAGCAATGACATTGATAATTGGGTTCGCGAAGCACATAATTCAGCAGCTAGTTTTTTCAAGGATCATGTAGAACAACCGCTTATTTCAATTAGAGATGAACTTTTTGATACATTTAGAAAGAGGCATAAAGGTGTGATGGAGGTTCAAGAGGTTCAGTTAACTGCTATCTCGCTGCACAGAATG…
Novel_G000400	Novel_T009942	CTTCAAGATAGTTGTCTGAATATATGGACTCTTGTGCCATTTTAAATCATTAACCAATCTAAATAAAGTTAAGCTGATGGGTGACACTAAACATAATTTTATTCATAGTTCAACACAAAATACCAATACAAATACTATTATGCCCTCCTCAGGTCAGTATTGAAAACGAAGTTACGGAGCACCATGAGTTACTCCCTACAGTGATGTGTTTATTTTTTATAGTTTATGAATACTCACTAAGAAGTGTTCATTTATGTGTGTCTTCCTTGTATGCTGATGCTTCTTTTTGTGTTTTTCCTTGTATTCTGATGTGTACTCATCTTCCTTTTTAGGTTTGTAAACATCGAAAGCCAAGGAAACTAACTCAATACTGGCTTGGATATTCTTGTGGTGCAATTG…
Novel_G000401	Novel_T010004	GACATCGTCTTTGTGTTTGTGTGTGTGTGTGTGTTTTGTGGTAGTGGGTGGTGTAAATGAGAGGGGGAGAGAGAGAGAGGATGGTGGTCCACGCGTGCGAAGGTGTGAAGGTGGGCGTACGAGCGTGGTAAGGTACTAGCAGTCACGTGCGAGGAAGTTTATATATACCAATACCCACTGAGAAAGGAGAAAGGAAAGAGAAAGAAAGAAAAAAGAGAGGGAAGAGAGTGGTGGCGTAGAAGCAGAAAAGGGTGTGGCCTTTGCCTTTCATATTTTTTTTTGTATTCTTCTGTGCACACACTCTTTGTATCCAGTTGTTGGGGAAACATATACACACAGAACAAACAACAATTTCATTCCTTTTTTTTTTTTTTTCTTTTCTGAAAAAGCAAAACCCCA…
Novel_G000402	Novel_T010048	AAAAATCTCAAAACTTGAGCAACAAGAAGCTTTTATATACTCCAACGATCATATCTCATCAAATCTCTTTGAGACACGAATGCTCCTTCTGGATGGTTCTCGGCGACGTTCGGTGGAGTGTCCTCTGGCTACATTCCGATCGAAAAGCTCACCTTCCTCACAAACCTCCATAACCAGATGAACATCATCGTTACCTTTTCCTTCCTCTTCGATATCGATGTACAAGCCAAA
Novel_G000403	Novel_T010051	CATTTACATATTCTTAAAACTTTAGAAGAAAAAGAAAATAATCAAACTATGTTCTTAAAAAGAAAAGAAAATAAATAAAGAAAGAAAGAAGGAAATGGGGAATTATTATTATTATTTAAAAGCGAAATGAATAAAAATGACTAAACCCTCCAGTTGTTCCTTTTCCAAAACCTCCACGATTTTCGTTCTTCTTCCTCCCGCCGTCGCCGCAGCCCACCCTCCAATATCCCTGCTGCAGTCGAACGCCGGCCTGGCACGCCATTCTCGCAGCTCTAACACCCACCTACGTTCTTCTACGGCTGCTAGTCGTCAGTTCCACACTTAGTCTTCCACGGCCTCTCCATGGTGAAGGCCTACCTTCGATACGAGCCTGCGGCGGCTTTCGGAGTGATCGTCTCT…
Novel_G000404	Novel_T010311	CTCTTCTGTTGAGAACAAGGCTATATAGAAGTCCTAACAAATTGCCTCCTGGTCCTAGAGGGTTCCCTGTTTTTGGTTGCCTTCATTTGCTAGGAAAGCTTCCTCATAGAGATCTTCAAAGTTTATCCGAAAAATATGGATCCATTATGTACATGAGACTCGGCCTTGTACCCACTATCATCGTCTCTTCTCCTCAAGCAGCTGAGCTCTTCCTCAAAACCCATGATTCTGTTTTTGCAAGTCGCCCATTTGTTCAGGCTTCCAAGTACATGGCATACGGTCAAAAGAACTTGGCGTTTTCTCAG
Novel_G000405	Novel_T010343	GGTGAAGGGATAGCCTGGAATAAACCTCGTTTTCCTCCATACAGAAATCCAAAGAGATATGGAGGTTTGTAAAATACTTCATATGAATTCAGGAGTCGGAGACAAAAGCTATGCTAAAAACTCCTTGCTTCAGACTTTTTCCTAACAGAAGTTTGCATTTTGTTCATTCTTCTTACGCTCTTCACTAACTCTCTCAGGTACCTGAAGGGATGGAGATGATAAACACAGGGAACATATTCATAAATAGTACAAGTCCAAAGAATGTTATTGAAGGGTATTATAAGCAATTTCAAAATGATTTCTCACTGTTTTTGTCCCACTTTGACCCTTTTGAATTTAGCTATGAGTGACATGGTTAAGGAGGTGAAATTATTATTCTGTGTGTACTTTTCTTTTCTT…
Novel_G000406	Novel_T010345	GAGGAAGCCATTGTTAGAGATGGAGGTTTGTAAAATACTTCATATGAATTCAGGAGTTGGAGACGAAAGCTATGCCAAAAACTCCTTACTTCAGCAAAAGGCAACATCCATAGCATGGCCAGTTATAAAGAAAGCCATTGAAGACTTGTGCAGTGAAAACAATAATTCAATTACCAGTTTAAGCATTGCAGATTTGGGATGTTCTTCAGGACCAAACACTCTTACAATCATCTCCAATTTAATTAAACACATTGAGCTTCACAATAACAAACCATTCCAATATCAAATCTTCTTCAACGATCTACCTTCCAACGATTTCAATTCCATTTTTATATCCTTACAAAATTTCCTTGAAGATTTGAAAATCCAAATTGGAGCTGATTTTGGAACTTGTTTCTT…
Novel_G000407	Novel_T010431	GTAGGCGGTAGGGCAGCTAACAATCTGCATTATAACCAATGATTTGCAAGAATCTTCTCCGCAAGAACAGGTCAAATGCTCATCTCTATTCCATTCATTCCATTTCTTTACCTACTCTGTTTCCTCTCATTTCTTCTTCTTCTTCTTCTTCTTCTTCGATTAGCTGAATTTGGAGAGACGAAACCCCCTGGAATCTTGGAGCTCAGAGGATGATGAAGATGAAGAAGGAAGGAAGATTGAGTTGGGTCCTCAATGTACATTGAAAGCACAACTTGAGAAAGATAAGGATGATGAAAGCTTGAGAAGGTGGAAGGAACAGCTTCTAGGAAGTGTGGATATTTCAGCTGTTGGAGAAACTTTAGAACCAGAAGTAAAGATTCTGAGCTTAGCGATTAGAAC…
Novel_G000408	Novel_T010432	GTAGGCGGTAGGGCAGCTAACAATCTGCATTATAACCAATGATTTGCAAGAATCTTCTCCGCAAGAACAGGTCAAATGCTCATCTCTATTCCATTCATTCCATTTCTTTACCTACTCTGTTTCCTCTCATTTCTTCTTCTTCTTCTTCTTCTTCTTCGATTAGCTGAATTTGGAGAGACGAAACCCCCTGGAATCTTGGAGCTAGTTCATTCTTTTGTCTACCATTTGTGGATGGTCTTTTGACTTGGTGGGAATTTTAAGAGAAATGGGTCTTGACAACAATGAAGATGGAAACGGTTCTCTTGAGATTAAGAAAATAGGTGGAGTTGAAGAAGAGAAGGGAGACGAAAGTGTTGGGTTGAGTATAAAAATGAGTGAGACTTCTATTTGTGCAGCAGA…
Novel_G000409	Novel_T010635	CTGCTCTCCTCTTTGAGCTGATTGGTTTTTCCACTCTCTTCTTCCATCTCTCTCTCTCTTGCTTTTGCTTTTTATTTTTGTTTTGGTGCCACTCTGCGAAAATTCCCATGCTTTCTCAGCTTTCTCTTTGCCAAATTCAAAAACCCTAGACTTGTTTTTTCCATTTCAAATTTATCCCATCTCTTTGGCTTTCTTGTTACCTCAGATCCAAGGCATTGTTTGTTTTGGATCGAAGTGTAGTGTTTGGTTTTGAAGTGGTGTGCTCTGTGTACTGACAGCTTCAGTGGGGTTTGAATTTTGTAGTGTGGGTTCTTTTTGGTGGCATTTATTTGTTGGCTGAAGAATGTTGCTATGAGTTTTTGATGGGGAGCATAGAGGAAAATTTTGGACGGCTTTAAC…
Novel_G000410	Novel_T010678	TGCTCCTCAGCCATTCCCTCGGAGTTCCCTTGGCTGCCCTCACAGGGGGTTAGTGTGAACAAGCAACAAGGAAAGGGCTATAACAACCTTACTAGAATGAGCAATATGAGATGTCAACACTGTGCAGGCCCTCTTTCGAAGGATATGGAAACAAGTGCTTGGACAATTCCTCCTCTTATTAGGGATAGCTTCTCTATGATTGGCTCTGCTGTTGGTGGTACTGCTAGTGCTTTCTATGGATTTAACAATGTGATGCCTGTTGTCCAGAGATCAGTGAAAGGGCCAATGTGGTTGCATTTTCTTATTGGTGCTCCTCCTGTGATTATATTTTCTTCGGCTTGTGCAGGAATGACAGGTGGTGCAGTTCCAGCTTTGGCCCAACTTGTTGCTTCATCTTAT…
Novel_G000411	Novel_T010702	TGTGTTGGTATGGACATGGCAAGAACCGATCCTTCAATCTATATTCATTGTCTAGACTTAATAAGGTTGCAGTTATCCAATTATAGAAGTGCTAGTGGTGTCCAAGCTCTTCTTAAAGGCAATGCAAAAAAAATGGCTGAGCAAGATGAAGCAGTTCTAGTGGCATCAGGAATTCCTTATACCATCATACAAGCTGGCTCCTTGCTAGATACGCCTGGTGGGAATCAAGGATTCAGCTTTGAAGAGGGTTGTGCAACTGCGGGAACTCTCAGCAAAGAGGATGCCGCCTTCATTTGTGTAGAAGCTACTGATGTGATTCCTAAAGGAGGGTTTGCATTTGAGGTTGGCAAAGTTAATCTTTATGTCCAACGCCTATGATTGTTTTTGATAAATTTCATC…
Novel_G000412	Novel_T010712	CTAACATTTGTTTTTCTTCTTCACTCATCTTTTCTTTTTAAGAAGTGTTTGAACTTCTTTCTTTGTGAAACTGAAGTCTCAAGTCTCTCTTGATCGGAGAGCTTCTTTTGCCAAGTGTATCTGATGAGTTCCTCAACTACCTTGCCTTCTTCTTCAGCTGAGAAAGACTCACTTTCACCAATTTTTCTACTGTCCAACATTTGTAACCTGATTTCAATGAGGCTTGACTCTACAAATTTTGTCCTTTGGAAGTTCCAATTGACAGCGATTTTGAAAGCTCATAAACTTTTTGGCTTTGTTGATGGTACTAATCCATGTCCTCAGACTAGTCCGTCTACTACCTCGACCGTTCCGCCTCAAACGAATCCTTTATATGAAGATTGGATTGCTAAGGATCAG…
Novel_G000413	Novel_T010713	CTTCACATTCCCATTTGAAAGAAACTTTCTTCTCCTGAAAACTTGTGTTCTTACAATCTTCTCATTACTCTAGAAGTACATCAATTCTATTGTACAACATGGGGATTCGTCAACTTCTTAAAAGAAACCAAGGAGTTTCAACAATTCCCAAAGGTTATTGTGCAGTCTATGTTGGAGAGAACCAAAAGAAACGGTTTGTGATCCCAATTACACACTTGAATCAGTCATGCTTTCAAGAGTTGCTTTCTCAAACTGAAGAAAAATTCGGTTACCATCATCCCATGGGTGGTCTTACTATTCATTGTAGAGACGACATCTTCACCGACCTCATCTCTCGTTTGTAGTATATCATTAATCTTGTAGAATAGGGGCATTGAAAATAACCAAATCATTGTACAT…
Novel_G000414	Novel_T010714	AAAAGAAACTTTCGTCCCATAAAAACGCGTTCGTCAACTTTTGAGTAGTTCTAAGTGTGTTTACTATAGTGTACAATATGAGGTTTCGCCAACTTCTTACAAGAAGCCAAGGAGTTTCAGCAATTCCCAAGGGTTACTGTGCAGTGTATGTTGGCGAGAGCCAAAAGAAGCGGTTCGTGATCCCAATAACGTGCTTGAATCAACCATGTTTTCAAGACTTGCTTCGTAAGACAGACGAAGAATTTGGTTACCATCATCCCATGGGCGGTCTTACTATTCATTGCAGACATGACTTCTTTACTAATCTCATCTCCCATCTAAATGTTCTATGAGAAATTTATTGACACTCTATAG
Novel_G000415	Novel_T010891	TATGTACAATTTTTTATTCACTTATATATATAAATTCTTTAGTGGACTATAAGTCTTTCTTCATCAGACACAGACTTCAAGTTTTCAACTCTCACCATCTTCTTCTTCTTCTTCCTCTTCTTCTTCTTCTTCTTCTTCAAAAACTTCTGTTCCAATTTCTGTTCATAATTACTAGATATGGTTAGAGCTCCATTTTATGATGAAAATGGAATTAAAAAAGGTGCATGGAGTGCTGAAGAAGATGAAAAGCTCAGAGCTTATGTTCAAGAATATGGTCATTGCAATTGGCGAGAGCTTCCTAGATATGCTGGTTTGTTGAGGTGTGGTAAAAGTTGTCGACTGCGTTGGATCAATTACCTTCGTCCAGATGTGAAAAGAGGCAATTACTCCAAAGAAGAA…
Novel_G000416	Novel_T010948	TCTTGCTTCACCAGCTTATAAGAATATTAGAATTCTTACATTTTTGTTTCTCAGAAAACTGAGCAATTCCCCATTTCAAGAAGATCAAGAAATTCAATGATGGAATCTGTCTCACAGACTGAAAAACCACATGCTGTATGTATCCCATATCCAGTCCAAGGCCATATCACCCCTATGCTAATGCTTGCTAAGCTTCTCCATCACAGAGGTTTCTACATAACTTTTGTCAATACCGACTACAATCATCGTCGTCTTCTCCAATCGAGAGGCCCCAACTCGCTCGATGGCTTGCAAGATTTTAAGTTCCGAACCATTCCCGACGGCCTTCCTTACTCGGACGCCAACTGTACTCAAGATATTCCAGCACTCTGTGAATCCACCTCCAAGAATTGCTTAGCC…
Novel_G000417	Novel_T010960	TGTTAACGTGTGTGTGTGTGTTTCGTGAGGGAAAGCAATGCCATTGAAGCAACTTTCGAGGCGGACAAATCTCATTCACTCGTAAGCAATCCCATCCAAACCGCACGTTTCCCCCCACGTCATTTGGTTTTGAATCAAACCAACTTTTGTTCATTCACCATTCCCTCTCTTCTTTGCTCACTGATTTTTATAAATATCCCAACCCAAAGGAACAGTTAAAAAAGCAATAGAAATGGCTAATCAAATCACCACCGCTCCTGATCTCTTCACTCCTTACAAGATGGGCAACTTTAATCTATCTCACAGAATCGTATTGGCTCCACTGACAAGACAAAGATCCTACAACAATGTTCCCCAACAACATGCCATCTTGTATTACTCTCAGAGAACCACCAAAGG…
Novel_G000418	Novel_T010961	CCCCACGTCATTTGGTTTTGAATCAAACCAACTTTTGTTCATTCACCATTCCCTCTCTTCTTTGCTCACTGATTTTTATAAATATCCCAACCCAAAGGAACAGTTAAAAAAGCAATAGAAATGGCTAATCAAATCACCACCGCTCCTGATCTCTTCACTCCTTACAAGATGGGCAACTTTAATCTATCTCACAGAATCGTATTGGCTCCACTGACAAGACAAAGATCCTACAACAATGTTCCCCAACAACATGCCATCTTGTATTACTCTCAGAGAACCACCAAAGGAGGTTTATTAATAGCTGAGGCCACCGGTGTTTCTGACACTGCCCAAGGGTACCTAATTAATATCATTTTTGTTTTGAATTTAGAGTATCTTGAATCTGTTATCAATGATCTC…
Novel_G000419	Novel_T010962	TTTTGTTCATTCACCATTCCCTCTCTTCTTTGCTCACTGATTTTTATAAATATCCCAACCCAAAGGAACAGTTAAAAAAGCAATAGAAATGGCTAATCAAATCACCACCGCTCCTGATCTCTTCACTCCTTACAAGATGGGCAACTTTAATCTATCTCACAGAATCGTATTGGCTCCACTGACAAGACAAAGATCCTACAACAATGTTCCCCAACAACATGCCATCTTGTATTACTCTCAGAGAACCACCAAAGGAGGTTTATTAATAGCTGAGGCCACCGGTGTTTCTGACACTGCCCAAGGCTATCCTGATACACCTGGGATATGGACAAAAGAACAAATTGAAGCATGGAAACCAATTGTAGATGCTGTTCATTGCAAAGGTGGAACATTCTTTTG…
Novel_G000420	Novel_T010971	TTTTTGCTTCTCTTATTTCTCTCTCTTCAATCCATTGGAGGACTTTCCAAATAATGGTATCTTGTCTGCAACCCCTCTTCAAGCTCTGTCAGTAATAAACCTCAAAAGCTACCAATACAAATTTAAACCCAACATCAGATAAGGAAAAAGAAAAAAAGAAAAAACCCATTGAAGAAACAGATCTTCCATTGTAAAGTGAAGATCATGACAAGGAAGAAAATTCAGATCAAGAAGATTGACAACATAGCTGCAAGACAAGTAGCATTTTCCAAGAGAAGAAAAGGGCTTTTCAAGAAGGCTAAAGAACTTGCAATTCTCTGTGATGCTGAGATTGGCCTTCTTGTTTTTTCTGCTTCTGGGAAGCTCTTTGATTATGCAAGTTCAAGCATCCAGGAGATA…
Novel_G000421	Novel_T010972	TTTTGCTTCTCTTATTTCTCTCTCTTCAATCCATTGGAGGACTTTCCAAATAATGGTATCTTGTCTGCAACCCCTCTTCAAGCTCTGTCAGTAATAAACCTCAAAAGCTACCAATACAAATTTAAACCCAACATCAGATAAGGAAAAAGAAAAAAAGAAAAAACCCATTGAAGAAACAGATCTTCCATTGTAAAGTGAAGATCATGACAAGGAAGAAAATTCAGATCAAGAAGATTGACAACATAGCTGCAAGACAAGTAGCATTTTCCAAGAGAAGAAAAGGGCTTTTCAAGAAGGCTAAAGAACTTGCAATTCTCTGTGATGCTGAGATTGGCCTTCTTGTTTTTTCTGCTTCTGGGAAGCTCTTTGATTATGCAAGTTCAAGCATCCAGGAGATAC…
Novel_G000422	Novel_T011002	CACCATTATTCCCTCTACCATTTTCTTGGTAAGTTTCCTCCTGGCTACTACCATCTCCAATGCCCAAAACTCCCCCCAAGACTTCGTCGATACGCACAACGACATCCGAGCGGCGGTAGGTGTTGGCCCAGTCTCCTGGGACGACACTCTAGCCGCCTATGCTCAGAGTTATGCTGATAGTAAGATGGATACTTGTGAGATGGAGCACTCCAATGGACCCTATGGTGAAAACCTAGCTGAGGGGTATGACGAGATGACAGGGGTGGAGGCGGTGAGGTTCTGGGCAACTGAGAAAAAGTTCTACAACCACCATTTGAATCGATGCGTGGGGGACGAGTGTGGGCACTATACACAAATAGTGTGGAGGCACACTACAAATATAGGGTGTGGTAGAGTGAA…
Novel_G000423	Novel_T011003	GCTTGCTTGGCTAATATGAATATAAATCAATCTTGTAACAACTCTAAGTCAAGTACTTTCTTGTGTTTCAACTGTTCATCAATCTGAATCACAACCCATATAATCTCACCATTTCTACACAAAATTTCACATTTCCATTCTTATAAATAGTAAGGGATTCCAATCCCATTTTCCCACAAAATTACTCCCCATTAATTTTCCAACTGATCTCAAAACAAAATGGCTCTCCTCATGAAGATGATCTCTCTCTCCCTCCTTTTTTTCTTGACTTCTTCCACTATATTATTCACCTCCTCTATCGCTCAAGACTTGCCTCAAAACTTCGTCGACGCCCACAACGCTGCTCGTGCCCAAGTTGGCGTCGGACCTGTCAGTTGGGATGAAACTGTAGCGAACTAC…
Novel_G000424	Novel_T011004	TTTTGCTTTTATATTTTTTCGTGCGTGCATTATATACTTTTGTAGAATATAATAAAAATATCAATTCGCCACTCACATCATTATTCAATCTAAAAAAATGTTAAAAATTTAGTTTCTTGTATGAACATTTCTTCTCCGTTCTTAGCAGCATTCTCCGCCACCCATTCACCGTTCTCGCGGCCCACACCTCTATCCTTCTTTTTTTCCTCATCTCCTTCTTTCCTCTCTTCGTTTCTTAATCCTCTTCTCCATATATATCAATCAAATTTAATATATTAGTAGATATAATAATTAATTAACATGATACCAAAATGATCTTCCAGCTTTAATTTCTCTTGTTCTGATTATGATTTTGGCCTCAATTTTTCTATGGTTATTAATTGTGCCTTGTGATGAAGT…
Novel_G000425	Novel_T011005	CTTCTCATAATTATTTTCCAACTCCATTATTCCAAAATCAAAACAACAATGGATCTTCTCAACCTCTCCTGCATTCTCTTTTGTGTCTTGAGCTGCTTCACCATGCTTCCCTCTTCTCTCGCTCAAGACTCGCCCCAAGACTACGTCAATAGCCACAATCATGCTCGTGCCGCAGTTGGGGTTGGACCTATCAAATGGGACGAGAAGGTGGCAAACTATTCCAGATATTACGCCAACAAACGGATGAATGATTGTAGGTTGGTGCATTCAAATGGACCATACGGGGAGAATATTGCATGGGGTAGCCCTGACTTGAGTGGCATCAATGCAGTCAAACTTTGGGTAGATGAGAAGCAATACTACAACTATAACAGCAACTCATGCGCCAGCGGCAAGGTG…
Novel_G000426	Novel_T011070	ATCTAAAACCCTAAAATCTTACACATTTTCTAAAATCCTCACGCGAAGAAGGCCATCTCCAGACGACGCCCGATCTCGCCATCGTCCGCTCGTGCCCGTCTATTCACTCCAGCGTTGTCACAACCTCATCTACGAACGATGAAACCTCCTCTGTCGGTATCTGTTCCTTCTCCCTTTCTCTCTCTTGGAAGGACAATATGGAGATGATGATGCAATCCAGTCGATCGATCTTGCTTCCAAATGTCTACAATACGAAGCAAGAGATCGACTCGATATAAAATTTGTTCTTTCAGCAGTGATGCCACTTCAAAAGTAGGAGGTAAACATTTAAATGTCTTAACTCAACCTGAAAATTTTATCAATGGTGTGGTTTGTCTGATTTCATTTGTTGAAAATCAG…
Novel_G000427	Novel_T011071	CCTCACGCGAAGAAGGCCATCTCCAGACGACGCCCGATCTCGCCATCGTCCGCTCGTGCCCGTCTATTCACTCCAGCGTTGTCACAACCTCATCTACGAACGATGAAACCTCCTCTGTCGGTATCTGTTCCTTCTCCCTTTCTCTCTCTTGGAAGGACAATATGGAGATGATGATGCAATCCAGTCGATCGATCTTGCTTCCAAATGTCTACAATACGAAGCAAGAGATCGACTCGATATAAAATTTGTTCTTTCAGCAGTGATGCCACTTCAAAAGTAGGAGATTGAAACCCATGACTACGTGACCATGGTTCAAGCAACAAAAAATATTTTCAGAGGTGAAGGATTATCGGTTTGTTGTTTATGCTCGTACAGAAAATCATGTTATATGTATTATGA…
Novel_G000428	Novel_T011075	CAAACTTAATAACAACTATATTATTATTTCTTTTGACCGAACATATCTCTAAAGTTTAAACCCACATGTTCTTCCCTTTCTTTATTGCAACCATTTCCTTCTGAATTTCACCTTCCATTCGACTCGATTCTTTACTGATTTCAATGGGTAGGCGTGAATTGTTCGATCTCGAGAGGCATTTTGCATTCTTTGACGCTTGTCACAACAACCCAACAAATATTTTCATTCATATTCTCTTTGTTTGACCTATCTTATTCATTGGTCGGGCTCATGCTTTTCTATTATACCCCTTCCTTCAACTGTTTTTCCAAGTGCCTTTGTGGCTTTAATACTATCCATGTTTTGAATTTTGGGTTCTTGTTTGCTTTGCTTTAAATTCATATTTAGGATATGTTGACT…
Novel_G000429	Novel_T011094	TATGAACTTGTCAACCCCTCCCTAGCAATCATTTTAGTAAAGATGTTACAATATATGTTTATTGGGCTTTAATGTTTTATCTCGCACGTATTAAAATTTCAATAGGAGTTTCAAAATGAGATTGCTACACTTCTTAAACCGTTTAGAATGGTTCTATGCATGTTTAGCAAGTTTATTAGAATGTTTTAATGTTTTATCTTGCACGTATCATAGGAGTTTCAAAATAAGATTGCTACCCTTCCTAAACCGTTTAGAATGGTCCTATGTATGTTTATCAAGTTTATTGAGCCATAATGTTTTATCTCACACCTATCTTGCATGTATCTCGCAACTACCAAAATTTCATTAGGAGTTTCAAAATGAGATTGCTACCCTTCCTAAACTGTTTATAATGGTCAT…
Novel_G000430	Novel_T011095	ATTAGGGTTACCGATAGAATGAGAACGTCGTCCTCCTCGTTCACGGCTGCTGCGATGTTGAGATGGTTGGAATGCAACCATGGCTGTGGGAATGGCTTCAATGGCTGAAGTTTTGGCCATAGTTGATTCCTCCAAAATGAGTAGAGTGTGAAGTTCTTCAAGGGAGATGGTGCTGTTGCGGGTTCGAATTGATGTACGAAAGGCATTGAAGGCAGTGGGGAGCCCATTTAGGGTGTGAACGGGAGTCTCTTCATCTTCAAGAGAGACGGATGTGGCGGCAAGTTTATCGACAAGGGCTTTAATACGAGAGGTATATTGTTTAATGATTTCAGAAGGAGTTTTTTTTATGGTGTAGAGTGCTGACCTGAAATCAAGAATGTTAGATCTGGTATTGGAGAG…
Novel_G000431	Novel_T011096	GTTCTAAACACAAACAAAATTAAAATTAAATTTTTTTGTCAATCATCACCCTATTGTTTAACTAAGCAACCAAGCTTATCCAAACTTACCCCAAGATTAAAGTTGAATCCAACATAACCTTAAATGAAAAAATTCACAGCCTCAATTCCTTCGATTATACTTATCCTTCAAGCAAACATAGATCCACTTAAATCCATAACTTAATTCATTTGGGACAAAATAAGTAATTAATGGGGGTAGCAAACTCAATCAATACTAAGCAAAACTCACTAAAAGTGACTCTAAAACAGGGAACAGCTCGGCAGGGTAGTCGGCTCGGGCGCGCGGCTCAGAAAAACAAAGACGACTCGTGCAAGAGATCGTGGATCACGCGACTCAGACTAACGCAACTTGGACGTA…
Novel_G000432	Novel_T011107	ATTTTCCGCAATTTTTATCTTCTCTTTTCCCCTCACACATAATTGAATCTCTCTTTCGACTGCCTTCACCACTAAACCTCTCTTTCGACTCCCCTCGTGACTGACCTCTCTAGGCTACGCTCATGATTGTCGTTCAACTCTTTTGCGACGATATCCATCTCACGCGACGACCTCTCACGAGCAAATCCATCACGCGACCAAACCCATCTCTGAAAGCTATTTAAACGATTACGACGACAATATTGGAATTACAACGATGATTTCTCATCCCAAACGACAAGGAGAGCGATTTGGTATTCAAGGACCATGACGTCGACGACCACATCGGCAAACCCCATCTGTTTTCTTGCGGACGACCACACCGATAGATTTGTGTAAGATGAAGCCAAGTACCGAACA…
Novel_G000433	Novel_T011122	ACTTTTTAATATTCCTTCACACAACCATGGTTCCCTGTATTCAGTCACCTTTATTTTCTTGTGGCAGGCTACATTAAGATATATCAAGGTTGGAGACCAAAGTTGAGAGGCTAAAGTCGGTAGTACAAGTTAAAGATAGGGAGATTGCAACAGTTACACGAATAGAAGCCAAAGCAAGTAAGAACTCAACAAATACATGAGATGAAGAAGAAAGAAAAGGAGTACATCAAATTGCAGGTGAGAACCTTTTAGTTATTTTTCGGTTCTAGGCTCAAGTTGGACTCTGTTAGAGGTGTTTATTATTTACAGCTGAGATAGGAGCTTTTGTATGTCTAAACCAAGTCTTAAGGGAGAAAAAGAAAGAATTCCTACCAAACCCTTCCACCAAGACCATAGAAT…
Novel_G000434	Novel_T011186	TTTTAGAGTAATGGATGAAATAGAAATAGTGAAGTGTGAGTGTTGTGGGTTAAAAGAAGAATGCACAAAAGATTATATCAGTGAAGTGAAGGCCAATTTTGACGCGAAATGGCTTTGTGGCCTTTGTTCTCAAGCCGTGGGTGATGAAATTTTGTTTAGACCCAAAAACAACCACCACTCGCCGCCACAGCCGCCGCCTTCGTCCACTGGTGGAATTCAAGATGCCGTTAATGCCCACATGCTTTTCTGCCGTAAGTTCAAATCTAACCCTGCCGTTAGAGTCGCTGACGGCATGAAACAAATCTTGAGAAGGCGCTCCTCCGACTTGTCGTCCTCTCAATCCTCATCCTCATCTTCTTCTAATTCCACTTCTTCTTCCCACATGTCGTCCTTCTCTTC…
Novel_G000435	Novel_T011223	GCCGACCAGGGTTATTCCAGCTCCATAGAGAGGAGTTGGTAGGTTTCTTTTCCATCGTTTTCTTTATTACTGTTATATTGGGCTGTTGAATCATCTTTTGGCTTATATATAAATAAAGATCAGCAGAGTACTGTTTCTGTTTAGCTACTGTTGGGGTAATTTTCTGTGTTATTTAGTTAGTACCCTTTACACAATGCTGGCAATCCCCCCATATATATAAAAATCTAAACCCATACCCACATGCAATGCATTCTTCTATAAACTCATTGTATCACAAAATTTTTTTAGTAGTTTGAGATTTTGAGCTTGCAGTTTATCACGGAAAATATTCCCAACTTTCCTGCCACTTGTCGAATCGTTGATGATGCCAGTTCCAAGGCACGAAGTCTAAAGATGATG…
Novel_G000436	Novel_T011224	GACCAGGGTTATTCCAGCTCCATAGAGAGGAGTTGGTAGGTTTCTTTTCCATCGTTTTCTTTATTACTGTTATATTGGGCTGTTGAATCATCTTTTGGCTTATATATAAATAAAGATCAGCAGAGTACTGTTTCTGTTTAGCTACTGTTGGGGTAATTTTCTGTGTTATTTAGTTAGTACCCTTTACACAATGCTGGCAATCCCCCCATATATATAAAAATCTAAACCCATACCCACATGCAATGCATTCTTCTATAAACTCATTGTATCACAAAATTTTTTTAGTAGTTTGAGATTTTGAGCTTGCAGTTTATCACGGAAAATATTCCCAACTTTCCTGCCACTTGTCGAATCGTTGATGATGCCAGTTCCAAGGCACGAAGTCTAAAGATGATGCAC…
Novel_G000437	Novel_T011245	ATTCCTTCCATTTTTTGTTCCTCTTTCCAAAACCCATTTCTTTTGTTTTGGCAATTCAAAGCTCAATACTAACAAAAGTAATGGCTTCAATGTCCTCTCATGGCTCAAATGCATGGACTAAAATGCAAAACAAGACATTTGAAATGGCTTTGGCTGAATATGATCAAGACACTCCTGAACGATGGGTGAATGTTGCTAAGGCTGTTGGTGAAAAAACTGAAGAGGAAGTCAAGATGCATTACCAACTTCTCCTTCATGATGTCAAACATATTGAGTCTGGCAATGTCCCTTTTCCCTATCCAACGACATCGAGCAATGATGATTTGCCAAGGAAACGAGGATGATTAAGAACAAACTCTTCATTGATCGAGCTGGTGCAATACTTTGAAGAATATAGAA…
Novel_G000438	Novel_T011319	GTAAACCCTTATTATTTTTCTCAATTCTCCCACAAAGTATCCATCTCCAATCTGACCGTCTTTCGACCCCGTCACCATCTGCCACTACTCGTGGCCATCTGTTCACTCCGACGTGGCCGTCTATTCGCTCTGACGTGCTCATCTATTCACTCTAGCGCTGCCATTAACGAACGACGAAACCCCTGCAATCCCTCTGCAATCTTCAAACCTTTTCAATTCGTTCTCGTCTTCTCCAGTGTTGTCGTTCGTGCCCGTTGTCTCCGGTGCTGCCATTTGTGCCCGTCGTCACCTCCTCTACCGGATTCCTTTTCATAGGTGAAGTTCGAACTTGCTGCTTATGAGAAGTTAGTATTTGGAAAATTAGAGATGGTATTCTTGTTGTTACATCACATCCACTTA…
Novel_G000439	Novel_T011322	GTAAGGAGCAACAAGCGAAACGAGTAGTTCAGACTATTTTGTTGGCTAGTTTTTGGACTACAATTGTTTTCACTCTTAAAGTATCTGGCCCACTAGTCCGAGTTCTTAGATTGGTTGATGGCGAGAAGAAGCCACCTATGGGATATATTTATGAGGCCATGGATAGAGCTAAGGAAGCTATTGCTAAATCCTTTAATAATAATGAAGAAAAATACAAGGACATTTTCACCATAATTGATAAAAGATGGGAGCTTCAGTTGCATCGTCCCCTGCATGCAGCGGGGTATTATTTAAACCCGTCATTCTATTATTCGAATCCTAACATCCAGGAGGATGATGAAATAGTTAATGGACTCTACTCATGCATAACAAAAATGGTTGCTTCATTGGAAGTACAAG…
Novel_G000440	Novel_T011370	ATTTTTCAAAACCCTCTTTTCCCCCATTAACTTTTATTGAAGCTTCTTCACCTTCTCTCTCTCTCTCTCTCTCTCTCTCTCGTCCTTCTTAGGTTTTGTTGCTGGTTAATGGATATTGAACCCTTGTGGGGTGTTGGGGGGTGGTTTTTTTTCTTAAATTGCATGGCAACTGCTTCACAGAAACAATCTTCATCTCATTTTTTCGTTCTCTTTCTCTCTCTTTTCTTCTCCTTCCTCCTTCTTCTAACCCTCATTTCCTCTCCTCCTTCCATGGCCTCAGACCGCCATCACCGCCTTCTCTCTGCCTCCTCCACTGCCTTCCATCCAAAGAAATCTCGACCTCGAACAACCTCCCCTGCTACCGTTGTCGGACAGTTCGGAGCTGAAGCCCATGAAGTT…
Novel_G000441	Novel_T011446	CAAAGGCAGCTCGCAACTCATTTCGCCACTTCCCCCATGAATTTTGAATGAGAGCTTAAACGGCAAAGCTATGGCGTCTCGGTTCTCATATTTCCAGCTGCACAGACGCCTCTATACAACCACCAGCCAATGGAGTGTCAGGCAAGTTCGCAATTCCAACTTCCTTGGCTCCTTGGAGGATCTGAAGAACGACATCTCCGATTCCGACTTCATCGCACTTTCTCTTCAGAGAACGGGTTCTTCTTCTTTCCCTTGGCACCGCCTTCAGCCCTTCGACACTCACGATACCGCTTATTGCAAGGCCAAGTACGCCGCCGAGAAGTTTCAGATTATTCAGTTTTCTCTCTGCCCTTTCTCTGTTAGGGATTCCAAACTAATCGCCCATCCGTACAACTTTCA…
Novel_G000442	Novel_T011447	TCGCAACTCATTTCGCCACTTCCCCCATGAATTTTGAATGAGAGCTTAAACGGCAAAGCTATGGCGTCTCGGTTCTCATATTTCCAGCTGCACAGACGCCTCTATACAACCACCAGCCAATGGAGTGTCAGGCAAGTTCGCAATTCCAACTTCCTTGGCTCCTTGGAGGATCTGAAGAACGACATCTCCGATTCCGACTTCATCGCACTTTCTCTTCAGAGAACGGGTTCTTCTTCTTTCCCTTGGCACCGCCTTCAGCCCTTCGACACTCACGATACCGCTTATTGCAAGGCCAAGTACGCCGCCGAGAAGTTTCAGATTATTCAGTTTTCTCTCTGCCCTTTCTCTGTTAGGGATTCCAAACTAATCGCCCATCCGTACAACTTTCATTTGTTCCCC…
Novel_G000443	Novel_T011448	TTTCGCCACTTCCCCCATGAATTTTGAATGAGAGCTTAAACGGCAAAGCTATGGCGTCTCGGTTCTCATATTTCCAGCTGCACAGACGCCTCTATACAACCACCAGCCAATGGAGTGTCAGGCAAGTTCGCAATTCCAACTTCCTTGGCTCCTTGGAGGATCTGAAGAACGACATCTCCGATTCCGACTTCATCGCACTTTCTCTTCAGAGAACGGGTTCTTCTTCTTTCCCTTGGCACCGCCTTCAGCCCTTCGACACTCACGATACCGCTTATTGCAAGGCCAAGTACGCCGCCGAGAAGTTTCAGATTATTCAGTTTTCTCTCTGCCCTTTCTCTGTTAGGGATTCCAAACTAATCGCCCATCCGTACAACTTTCATTTGTTCCCCAGAGATGAAT…
Novel_G000444	Novel_T011474	CCCCTCAGTATTTTTAAAAAAGAAAAGGAAAAATTAAAAGTGAAGATTAGGTCACGCAAACGGAGAGTCTCTCAAAGCATAAACACAAAACCACAAATCAAATCATCACTTTCAAATAAACGCTGCCACCACCTCCAATTCCGTCTACAAATCATCCCAAATGCCTATCCCAACCACTTGAATCACACCCAATTTCGCCGGAAAACCTGAATACGATGCTTTCCTTTCCACACCCTCTTCACACCTTTCTACAGAATTGCAGATCTGGTAAGATTACCTTAAATGAAGCATTAGATTTCTTTCAACTAATGATGCGTTCAAATCCTATCCCTCCCGTTTCTTCTTTCAATCATTTACTTTCCGGGCTTACTAAGATTAGGCATTACTCTCAAGTCTTTT…
Novel_G000445	Novel_T011481	CCGGTCACTAACAATCATCTCTCCTTTACCAAAACCGTAGCTCGTTTCTCAAATTCAGTCAGTTTCAACCAAACCCATGTCCGAATTTATGGACAAACTCACTCAAATTTCTTCCATAGACGGAAAACTCAAAGGGAAATCCGAGCTGGTGGAGGCCTATAGCTTTGCAAAGACTGTCGATGAAATTCTTAAGCTGTTTAAAGATAGATAATCCGATTTTGTGGAGAAGGGTCTTGAATTGTCTTCCTTGAAGATTGGTCTGATAATTGATTGTGATGGTGAGTGCCCTAGAAAATAAATTAAATAAATAAATAATCTCTTTTATATGCTAAATTGAGCTTTGAACCCCTGTCATGGCATTGCAATTCATAGGTTCTGTTGACAATTCAGCGATTCTGA…
Novel_G000446	Novel_T011498	AAAACACTTCCCTTCCCTTCTCCCTTTATTGCCTTCAAATTCCTCATTTTACTCTGTACCCACAATGGGATTTTGTTAGATACATACTTCTTCTTCTTCATTTCTACTCTATTTATCTACATTCCTTCTTTTTGCTTCTCTTTCAATCTCATTCTACCCTTTCACCCTTCCCCCATTTGGATTTTGCCTTTCTATTTTCTTATCTCCTTTCTTTTTTACTCTGTTTTTCCCTTATTACTTCTGGGAGTATTCGGAAAATTTGAACCCCCATTTGGTTGATTCCCCTTTGTGGGTGGTTTTGGGTTATGACTTCCTGTTTGGGAGGTGGGAAAATCAGAATGCCAAGAAACAGAGATTTTCCTTGTTCACCCCTTTTCTTCTCTCTCTCTTGCTCCCTTG…
Novel_G000447	Novel_T011540	CATTTATCTACATACATTTTCCGGAGCTTCGATTCTAAAGGCTGGTTGATGCTATTGTCTTCCTAGATTATATAACCATACTGTCCCAGCGTCAATTTTGGAGCTCCCCAATTAATCAAATTCTGATTTCTTCTATTGCAAGTCTAAAATCAGCTCACTTTTTGACTTTCTGAATTGTAGGGAGCTTATTTATTTATATATATACATACATACATATCTAGCGCTTCCTGGAAATGGGTTTTCACGATTTTGATTTAAATCGAAAACCCATTGCCGGAGCAGTGCTATTGATGGAATCGAAGTGATCGTTCTCTGCAATTCGTCTCTCATGGGGAGTTTTCTTGGTGGCTTTTTGTTGCCGCTTCTGCTTCTTACTGCGGCTCTAATAAATTGGAGTCT…
Novel_G000448	Novel_T011541	CATTTATCTACATACATTTTCCGGAGCTTCGATTCTAAAGGCTGGTTGATGCTATTGTCTTCCTAGATTATATAACCATACTGTCCCAGCGTCAATTTTGGAGCTCCCCAATTAATCAAATTCTGATTTCTTCTATTGCAAGTCTAAAATCAGCTCACTTTTTGACTTTCTGAATTGTAGGGAGCTTATTTATTTATATATATACATACATACATATCTAGCGCTTCCTGGAAATGGGTTTTCACGATTTTGATTTAAATCGAAAACCCATTGCCGGAGCAGTGCTATTGATGGAATCGAAGTGATCGTTCTCTGCAATTCGTCTCTCATGGGGAGTTTTCTTGGTGGCTTTTTGTTGCCGCTTCTGCTTCTTACTGCGGCTCTAATAAATTGGAGTCT…
Novel_G000449	Novel_T011591	GTTCTCCTTATTGCAAGGGTTGAAAATGTTTTACTCAAGAAAATCTAGAGATAATTCTCCCAAAGCTAGAAGATTTTAAGAGTCAAAAATACAATTTTTCTTTCAACATTCAAACTTCAAGAACAATACGTGCTCCGCTTCCTCAAATTAAACGTAGGCGTTCAACCAAATTCAAGAACATCATGTGCTTTGCTTCCTCAAATCAAGTGTAGACGTTCAACTAACTTCAAGAACACTACGTGCTTTACTTTCTAAAATCAAACGTAGGCATTCAACAACCTTAAAAAACATCATATGCTTCGCTTCCTCCAAATCATGCATAGACGTTCAACGAAGAGAATAAAAGGATCAAATTCTAGAGATCAAACCACATCACATTAAATCAGAATAAGTTCAACT…
Novel_G000450	Novel_T011593	TGTGTCTCTCTGTGGAACTTTAATATGAGAAGATAAAGGAGGAAGAAGGGAGAGAGAAAAGGAAGAAAAGACTTAATTGTTGGGATGACCGGATGGGTATGAAGATGCAGTAGAGGCACCCCTCAGTGGCTGTAAGGTTTAATGAGCAAATTGGAAGTAGAAAAGGGTCCACATTCATTCAACCCAAGAGGGCTTGGCTTCCTAAGTTTCTCTTGCTCTGGGTTCTGTTGGTGGCATTCATCAGTATGTTAATCTACAAGGGAATGAACACTGATAACAAAGTTAGAAGAAAGGAAGTTCTGGGAAGTATGTGTAACCAGAGGGAGGGCAAGGGTGCTTCAGGATCAATTTAGTGTTTGTGCCAACCTATGTCCATGCTTTGGCCGTTCACATTACCAC…
Novel_G000451	Novel_T011634	CGCGAATGCGCATTTGATCGTGAAGGACAGCTTCTCCCTTGTGTTCAAGAGAGAGAGATCTATCATTCTTATTTGGGGCCGATCTCTCTATTCTCCTCTCTTCAATTCCTTTACTTGAAAAATGGGGCTGTCTTTTACCAAGCTTTTCAGCCGGCTCTTTGCCAAGAAGGAGATGCGTATTCTCATGGTGGGTCTTGACGCAGCTGGTAAGACGACAATCCTTTACAAGCTCAAGCTGGGAGAAATTGTCACCACCATTCCTACCATCGGTTTTAATGTTGAGACTGTGGAATACAAGAACATCAGCTTCACCGTCTGGGATGTGGGGGGCCAAGACAAGATCCGACCATTGTGGAGGCATTATTTCCAGAACACCCAAGGACTTATTTTTGTGGTGGA…
Novel_G000452	Novel_T011639	GAAAGAACAGGTGGAGTCATAATTTCAATAGGGGCGGAAGAGAGAGAAAATGAAGAGCGCGCCAATAATAAAACGTCCGACATTATAATCATTCTCACTTCCCTTTCACTCTTCCGCCCTCGCCATCTCCATTGCCGTCCCCCTCGCGGTATCTGACCTTCAGAGGAGAAGGCATAATCGCTTAGAACAATGTCAGATTTAGACGTTCCTTTGCGTCCAAAGAGGAAGAAGGTTTGGGTGGATTACTTTGTGCAATTCAGATGGATTTTAGTTATTTTTATTGTTCTTCCTATATCATTCAGCCTATACTTCTTCACATATCTTGGGGACGTCAGATCTGCCTGGAAGTCCTACAAGAAACGCCAAAAGGAACATGATGAAAATGTGCAGAAAGTTGTC…
Novel_G000453	Novel_T011678	GCAAACCCTATATCTCCATCACCAAACCATCGAAGTTTCCTCATCGCTCAATCGAATCTTCAACCTCCAGAACTCAAATCTTCCAATTTCTGCTCTACTGATTTGCCCGAATGGCTCGCACCAAGCAAACCGCCAGGAAGTCTACCGGAGGCAAGGCCCCCAGAAAGCAATTGGCCACCAAAGCTGCCAGGAAGTCAGCTCCGGCTACCGGTGGAGTGAAGAAGCCCCATCGTTTCCGTCCTGGTACCGTCGCGCTTCGTGAAATCAGGAAGTACCAGAAGATCACCGAGCTTCTGATCCGAAAGCTTCCGTTTCAACGTTTGGTTCGTGAAATTGCTCAGGATTTCAAGACCGATCTGAGGTTCCAGAGCAGTGCCGTCGCGGCGCTTCAGGAGGCGG…
Novel_G000454	Novel_T011679	CCGCTTTTCCTTTTAACACAACCCTTTATATATTTCTTCACCCCCCAATTTCTTAATCATCACAACCAAAATCTCAGTTCAACCTTCCAAATTCTTCAACTTTCGTCAAATCAATTTCCCCGAATGGCTCGCACCAAGCAGACAGCCAGAAAATCTACCGGAGGCAAGGCTCCGAGGAAGCAACTCGCCACCAAAGCAGCCAGGAAGTCAGCTCCGGCTACCGGTGGAGTGAAGAAGCCACATCGCTTCCGTCCTGGAACCGTCGCACTTCGTGAAATCAGGAAGTACCAGAAGAGCACTGAGCTTTTGATCCGGAAACTTCCGTTTCAACGTTTGGTTCGCGAAATTGCTCAGGATTTCAAGACCGATCTGAGGTTCCAGAGCAGTGCCGTCGCGGCG…
Novel_G000455	Novel_T011680	CCGCTTTTCCTTTTAACACAACCCTTTATATATTTCTTCACCCCCCAATTTCTTAATCATCACAACCAAAATCTCAGTTCAACCTTCCAAATTCTTCAACTTTCGTCAAATCAATTTCCCCGAATGGCTCGCACCAAGCAGACAGCCAGAAAATCTACCGGAGGCAAGGCTCCGAGGAAGCAACTCGCCACCAAAGCAGCCAGGAAGTCAGCTCCGGCTACCGGTGGAGTGAAGAAGCCACATCGCTTCCGTCCTGGAACCGTCGCACTTCGTGAAATCAGGAAGTACCAGAAGAGCACTGAGCTTTTGATCCGGAAACTTCCGTTTCAACGTTTGGTTCGCGAAATTGCTCAGGATTTCAAGACCGATCTGAGGTTTCAGAGCAGTGCCGTGGCGGCA…
Novel_G000456	Novel_T011681	AAACCTCTCTTTTGTCTCATCATCGTCTCTGAACTTTCCTTTGGATCTAATCATTTTGAGAGAAGAGCTCTGTATTTCTCTCTTCAAATGTTAATTGCCTAAGATTTTCTCCTAAGAAACCGCGCCAGCATCTCCATCTCCTACTTTCCCACATTTGGACACAGTTACATAGAGAGGCATATGCTAATGTGCTGAAGAAATGCCCCTAAAGTGACCTGAGGGAATTTTTTCAATACATGTTCATATAAGCAAGAGATGAAAGGTGGAAACATCACCAGGCTGAGGGGGGGATATCTTTCCATTGCTCTGGTTGTTCTTATGTTTACAACCGTATTGTTCTGGGCTTGGGATAAAAAATATATTGCCAGTTTTCTTCCATTGACAAGAGAGCAGTATATG…
Novel_G000457	Novel_T011755	TTTCGGTCAATATTAATTAATTAATTGATTGATTTTATACATTTTTTCATCTTCTCCTTCCCCGTAGGGTTGCAGCAGATAAACGCCACCACTCCAAACCCACCTGTCTCTATAAGCTCACACCATACAAACCTCAAAGTTCTTCTCTTTTCACTTCTTTTTCACTCTCCTTTCTTATCTCTCTCTCTCTCTCTCTCTCTCTCATCCTCTTCCCCATCTCCCACTATCTGCAGCAATGGGTGCGTCACTTCCACCCAAGGAGGCTAACCTCTTCAAGCTCATCGTCAAATCATACGAAACAAAACAGTACAAGAAGGGCCTGAAAGCAGCTGATCAAATTTTGAAGAAGTTTCCTGAACATGGAGAAACTTTATCCATGAAGGGTTTAACATTAAATTG…
Novel_G000458	Novel_T011768	CGCGCACGAGCGATCACCGATTCCTCTTTCTGCTCTTCGACTTGCGCCATTTTCTCAGCCATTTCTTCCAAGCTAGGCTCCTTATTTTATGGGAAATTATAGCTTTCTATTTCTATTTCCATTTCACCATCCATGTCTACGCTATGATATGAGGGAAAGCCAAGCCTTTGAAGCAACCCAAGGTTAAGAAGAAAGGTTACGACGAGGTATGCTTTGATTTTTTTTTTTTTTTTATGGGTCTTCTTTATTTTTTAATGCAACTTTTGGGATCGAAGAATTTCAATCTGCCTTACTTTTGTTGCTTAGTTCTGTGTTTTTGGTTAGAAATCAGGATACCTTATTGTTTGTTCTTAAACGCTAGGTGGAATTTTCCATGTAACGAGCGAATCGACGAGTCAA…
Novel_G000459	Novel_T011783	GCCATTTGAAGTCATTGAAGATTGAGATTTTGATAAGGTTTAAGGCTTTCAATTTCTTTCTTTCTTCAACAAACTTAGGTTTCATCCACCAATATGTGGAGGTTAAAGGTAGCCGATGGCGGAAATGACCCTTACATCTATTCTATGAACAACTTTGTCGGAAGACAAATATGGGAATTCGACCCGAATGCTGGTACTCCAGAAGAACGAGAAGAAGTTGAACGCGTTAGGAACGAATTCACTGCAAATCGTCTCAAGGGTTTTCCTAGTGCTGACTTGCTTTGGCGTCTCCAGCTTTTGAGAGAGAAAAATTTCAAACAAAGCATACCACCGGTGAAGATCGAAGAAGGGGAAGAAATGAGTTACGAGAAGGCATGGGACGCAATGAGAAGAGGGGCG…
Novel_G000460	Novel_T011788	CTTCGATTTCCTCTCGGCTTTACTTTTGTTTCGTTTCCCGCGCCCTCAAAACCGCCAAGTGAGACTGAGAGGGCGACTTGATTCAACAATCATCGCCCTATCGTCACCGGCACCGGACTCTCTCACTAAGCTTCGTCCATCAAAGAAGAACAACACCCTCTTCCCGAATTCCATTCTCTTCTCTTCTCTTCTCTCAGTTGCTTCTCAGTCATCCACCGCCATGGATTCCCTTCTTATCTATACTCATTCCCGTCTCCTTCCAATTTGATCATATCAATCCCACTTTCAGACCTTCTCCCCGGTCAATGACTTCGATGGCTTCCACCAAGACACAACTATTGGCCCGCTGGCGAGCCATCGAGGAAGAAGACGACACCGGCCATGGCACAATACAACCTC…
Novel_G000461	Novel_T011879	CCGTAATCCATATTCTCGACTAGCAAAAGGTTTAGGGAAGGTTTTAGCTCGCACCGAAACCAGTTTCGGAATCAATTACAATCTTAGAACCATGGTTGTGAAGCTCCCAGAAGACGCTTCGAAGAATGAGAAGCTAGGTGACAATTCTAATCCAATCGATTCTGACATTGATAAGCAATTCATAGGCCTTCCTATCAAGTCAGCCGTCGATAAGTTTCAACTTCTTCCTGAATTTTTGAAGGTAAGAGGTCTGGTCAAGCAACACTTGGATTCGTTTAACTACTTCGTGAATACAGAGATAAAAAAGATAGTCAAGGCCAACGATCGCATTGAATCCAGTACTGATCCGAGTATTTATCTTAGGTTTTTGGATGTGAGAATAGGTGAGCCTTCTGTGAC…
Novel_G000462	Novel_T011886	CCTCTATCTCTACTAACCCTCTTTTTTTTCTTTCAATTTTACTCAAAATCCTCTTCTCCTTCACAAATTCATTCAAAAACAAATATGGCTTTAAAACACTCTCTCCTTCTCATTCTTCCTCTCTTATTTTGCCTTTTTCTCTCTCCCCCCACATCAGGGCATCAACAGAATTTTTCTTCTTCTTCTTCTTCTTCTTCTTCTTCTTCTTCTTCTAAGCAGAAGGAATTGGTAATTGGGTCAAGACCACCACAGTGCTTTAATAAGTGCTTAAATTGCAAGCCATGTGTTGCTGCTTTGGTTATTTCTCAGCGCCATACTAATAATAGTAACGATGATGATCATCTTGTTGTTTCTAACTTGGAGGCAGATCTTCTTCCAGTTCCTAAACATAATGCTTAT…
Novel_G000463	Novel_T011887	CTTTGCTCGAGAAAGTTGGCAAATTAATAATTCCTAATATGAGTATGAATTTCGATTAATGTATCAAAGTTGACAATGTTTTTTTGTTGAAATATGGAAGTTATTTGGTTTTATAGGTTGACTGGCTTCTTTCCCTGGATTTTATTCCGAGATCGAGATTGTAATTAGACAGTTCCACTACTTTCTTTTTTTACTTCATTCCTTCAAACTTTTTAAGTGTTGAGCACTCTTATTCCTTCAAACTTTTAATTGTGTATTTATGATTTTGATAGCAACTTCATCTTCAGTTTCTGAAAATCAAATTTGTTTGTTAATAGTTAATTTATTTTGCGTTATATTTCTTATTATTTTATCACATATAGTTTTTGCTTGTGAAAGAAAGACGACAGTATGAAGCAG…
Novel_G000464	Novel_T011914	TCTTTCCTCTGCTCTGTTCGAGAATAGAGCATCTTCTAAATTTCAAATCTTGTCAAATCCAACCGGAAATATTTGGATTAAAACCAACAAAATTTCAATTCACTTTGTTTTCTTTTTTCCTCATTGAAATGATTTCAAAGTGATAGAGTGGGGGAGTTCAGAGTTGCAAGCCATGGCGCAGGGCCTCATCCAGACGGGAACAAACCACTCATTCTTCTTCTTATCTTCCAAATCCAAAATTGCAATATCCTTCATTCTTCCATCTTTTCATCTTCGTGTTCTTCCTCTTCCTCGCTGTTTTTGCAGCTATTCTTCTTTGCAACAACCAATCGACCTGTGCAACTACAGGGAAACTTTCTCCAAGCGCATGGATATGGCGGGACTCAAACCCCACCACCG…
Novel_G000465	Novel_T011915	CTTTCCTCTGCTCTGTTCGAGAATAGAGCATCTTCTAAATTTCAAATCTTGTCAAATCCAACCGGAAATATTTGGATTAAAACCAACAAAATTTCAATTCACTTTGTTTTCTTTTTTCCTCATTGAAATGATTTCAAAGTGATAGAGTGGGGGAGTTCAGAGTTGCAAGCCATGGCGCAGGGCCTCATCCAGACGGGAACAAACCACTCATTCTTCTTCTTATCTTCCAAATCCAAAATTGCAATATCCTTCATTCTTCCATCTTTTCATCTTCGTGTTCTTCCTCTTCCTCGCTGTTTTTGCAGCTATTCTTCTTTGCAACAACCAATCGACCTGTGCAACTACAGGGAAACTTTCTCCAAGCGCATGGATATGGCGGGACTCAAACCCCACCACCGT…
Novel_G000466	Novel_T011916	TTCAAATCTTGTCAAATCCAACCGGAAATATTTGGATTAAAACCAACAAAATTTCAATTCACTTTGTTTTCTTTTTTCCTCATTGAAATGATTTCAAAGTGATAGAGTGGGGGAGTTCAGAGTTGCAAGCCATGGCGCAGGGCCTCATCCAGACGGGAACAAACCACTCATTCTTCTTCTTATCTTCCAAATCCAAAATTGCAATATCCTTCATTCTTCCATCTTTTCATCTTCGTGTTCTTCCTCTTCCTCGCTGTTTTTGCAGCTATTCTTCTTTGCAACAACCAATCGACCTGTGCAACTACAGGGAAACTTTCTCCAAGCGCATGGATATGGCGGGACTCAAACCCCACCACCGTATAGCTCTGGGAGTTAGTGGAGGGCCCGATAGTATGGCTC…
Novel_G000467	Novel_T011917	TTCAAATCTTGTCAAATCCAACCGGAAATATTTGGATTAAAACCAACAAAATTTCAATTCACTTTGTTTTCTTTTTTCCTCATTGAAATGATTTCAAAGTGATAGAGTGGGGGAGTTCAGAGTTGCAAGCCATGGCGCAGGGCCTCATCCAGACGGGAACAAACCACTCATTCTTCTTCTTATCTTCCAAATCCAAAATTGCAATATCCTTCATTCTTCCATCTTTTCATCTTCGTGTTCTTCCTCTTCCTCGCTGTTTTTGCAGCTATTCTTCTTTGCAACAACCAATCGACCTGTGCAACTACAGGGAAACTTTCTCCAAGCGCATGGATATGGCGGGACTCAAACCCCACCACCGTATAGCTCTGGGAGTTAGTGGAGGGCCCGATAGTATGGCTC…
Novel_G000468	Novel_T011919	TGCACATCTTTCTTTCTTCCTTCTTTCCCTTCCATTAGGACCGTTGTGCACAGTAAACTCATCGTGCTCGAAGCCAATGATCCATTGAGAACTTGAGAAGAGGACTTCTTATTTCCTCACCCACATCCTTCTCTCTACCAAAATGCTTCCATATAAACATGGCGGCCTCGAAGCCAGTTTTCCCATCACGAATCACAGACGCGGTTGATTTTCGAACCATATTCCAGTGAATGGGCTGGAGAAGGGCTGCTTCAGTTTTTCTGAGCCGCATATCGTTAGCTTCTAAATCTCCCATTCCAATTCCTTTCGCCACTTCAAGACCTTCCCATTTCTTTCATTCTTCAAACCCCGTGTTTCGTTTTCGATGTTTGGGGTCATTTTCTGCTCTTGCATCTCCGA…
Novel_G000469	Novel_T011925	NGGTTCTGTTTATTCCTCCTGGAGTCGACGCCGATGATATCTCCGATGAAATGATCCTTCCAGGTTCCAACATTGTGCTCGGCCCTTATGCCGGCGACTCCCGTGTCAAGGAGGTTGAGTTCGTCAAAAGCAGCGCTCGAGCTAGGGATTGCCCTAAAGACAGCAAACCTGAATTTGCGATTCTGGGTCGTTCTAATGTCGGTAAATCTTCCCTTATCAATGCTCTTGTTCGCAAAAAGGAAGTTGCTCTTACTTCTAAGAAGCCAGGGAAGACGCAGCTGATTAATCACTTCTTGGTGAATAAAAGCTGGTACATTGTGGACTTACCAGGCTATGGGTAATTCCTGTTTCTTTTCTTGCAAGTTATATTTGGGTTTTACTCTTTTGCATAAGTCTAGT…
Novel_G000470	Novel_T011927	GTGCAGACTGCTGAAAATGGAAGAAAAATCTTTGAAATGGACGCCATGTTTTAGTTTATCTACTAAGTCGTCATACATATTATAAAATATTACATTTATAAGAAGATTATCTGGCTGAAAATAAATAATTTGTTTTTAACGTTAATATGTAAATTAATAAAGCATTGATTTATATATTGATGGCATACGTTATCTGGATCTTTGTGGCTTACTATTAAATGTAGCTGATTACCTCCCTTTGTATCTCGTGGGAGCAGATCATGGGGCTAAATCCTCCATTCGGAGTTAAGGCTGCTTTGGCAAACAAATTCGTTGACAAAGCTCTGGAGTTCAACCCAAAGCTTCTTATTCTTATTGTTCCTCCTGAAACAGAGAGGTTGGATGAAAAAATGACTCCTT…
Novel_G000471	Novel_T011930	TCTCACACCAACCAAAAACACAGCCTCAGTCCTCACTACTGTTTCTAATTCAATCCTTCTCTTAATTAACCATTTTCACACTGCCAATTGAAATAACCATGGCCTCAATGAAGCTACCACTTGTATTCTTAGTTTGCATAGCCATTTTAGCAGTATCTGGCATGGCACACACCGGAGCATTAGCACCTGCTGATCCGTTCACAGCAGAGGAATTCTCATTGCTGGGTTGCACATCCTTCATTTCTGAGGCAACAAACTGTATGGTTGATGTAATGAAAAATGCAGTTGCTCCTCATCCATCATGTTGCAAAGCATTTTCTAAGCTCAATGACTGTTCTTCTGAGTTTCTCAAAGGCATTCCCTCAGCTGACATGATTTTGATTAAAGGCATTTGTGCTT…
Novel_G000472	Novel_T011931	CAAGCACTGGATGAATGTGCTACAAAAGCTCAACTTCCTTTCACAAAACCCTTCAGCCATTCACACTCTCAATCTTTCATCCCTCCAATTTCTCACAAAATCCTCTCTCTCGTCGGACTTCCATCGACACAGAAAGTAATCGAAGCAACTCTCCAACTTCTGAAGCCCAAACCATTTGCTGGAGCTAATGTGTTCGTCTCTCGTAATCTTGTCGCTTCGGAGATGTTCGATCCTTTTCACGACGCTCTCAAGCAGAATGGGGCTGAGGTTTTCCTCTGTTGCGATCCCTCTCAAAACGCCCCTAACGACTATCATGTTATCTCCTCCGCCGATCACGCAAAGTTCGAGGATCTTCGCGCCAAGGGATGCAACTTGTTAGGTATAGTTAATTTGTAGTTC…
Novel_G000473	Novel_T011932	TTTGTGCATCCACAGATATATGAAATTGGTGGCGGATCAGGAACGTGTGCAAAGGGGATAATGGATTACATAATGTTGAATGCACCTACAAGAGTTTACAAGACTATGACTTATACGAGACATGGAGGAGCAGCCGTGTTGGGTAATTATGCTTGAGGTATATCTCATCTTTAGCTCTTGTATATCTTCACAAAGTTCACGTACTGTTGAGGTTGTGAACATGAAAGAATATATAGATCAATTTTCCATGTTTGTGTGTATTTTGGGAAATAAATGTTAACTGATATATTTGCCTTTTGGTACCAAAATTAGCACTAGTCAATCTTGCACTTACGCATACGAAGGAGGAGATCGTTCACGAGAAACTGAAACCATGCTTGATTATAAACTTACGGAGAA…
Novel_G000474	Novel_T011933	TGTGCATCCACAGATATATGAAATTGGTGGCGGATCAGGAACGTGTGCAAAGGGGATAATGGATTACATAATGTTGAATGCACCTACAAGAGTTTACAAGACTATGACTTATACGTATGTGGTTTTTGCTGCATTTTTTCTCTACCATGAAATGATAAATATCTTCTGCTGCTTGCACCAAGCTGAGATATCTTTCTAGCTTTTAGGCTGAATTACTTTATGCATAGCACATCTACCTTGTGCTGTCAATAAAACCAAGGGGGGGGAAGGAACAACTTCCAACAATTTTCTATTTGTAAAAGCGTGAAAGGGGGTTAGTTTTTAAAGAAGAAATCTTATAAACTTCGTAGCTTTCCCGTAAAAATCCTCCACAATATGTATACGATCATATATTTTATA…
Novel_G000475	Novel_T011934	GCCGCCGCCACCGGCGTCGGCGGTGGATGGGAGGAGGATTTTGTTGTCGGACGTAGTGGTGAAGCGGCGGAGGGAAGTGTTTTGGGGAAGGAAATGGAATTCGTTAGATATCGGAACGGCTGGAGTGGTGGTGGCGACGCATTTACTTACACTTTTTGCTCCTTTTCAATTCAATTGGGCTGCATTTTGGGTGGCGATTTCTTTATATATAATCACTGGTCTATTCGGTATTACCCTATCATTTCATCGGAATCTCTCTCATCGGAGCTTTAAACTTCCTAAATGGCTCGAATATCTCTTCGCATATTGTGGAGTTCAAGCCCTTCAGGGAAATCCGATCGATTGGGTTAGCACGCATAGATATCACCATCAATTTTGCGATTCCGAAAGAGACCCGCA…
Novel_G000476	Novel_T011936	TATAGATGCCATTGAAGAGACACGAGAAAAGAAGCTTCTTTCCTCTGTATCCACTTCTTTAGCACTTGCTACTGGTCTTGGAATTGCTGAAGCTGTTATGCTGTCTCTTGGTTCAGGGACTCTAATGGATATCATGGGATTCATCAATGCGTGCACCTGCGGAGCAATTTTTGTCTCTGAGAGCATTTGGTGCTCCACCTATTGTAATTGCACTTGCTGCACAGGGCACTTTTCGTGGATTTAAGGATACAAAAACACCATTATATGCTACTGCTGCTGGTAATTTACTCAATGCAGTACTGGATCCATTGTTGATATTCTTTTGTGGTTTTGGCATTGGAGGTGCTGCAATTGCTACTGTGATATCTGAGTACGTCAACAATGTGGTATCTGATTGCT…
Novel_G000477	Novel_T011937	TATAGATGCCATTGAAGAGACACGAGAAAAGAAGCTTCTTTCCTCTGTATCCACTTCTTTAGCACTTGCTACTGGTCTTGGAATTGCTGAAGCTGTTATGCTGTCTCTTGGTTCAGGGACTCTAATGGATATCATGGGTATACCTGTTGATTCATCAATGCGTGCACCTGCGGAGCAATTTTTGTCTCTGAGAGCATTTGGTGCTCCACCTATTGTAATTGCACTTGCTGCACAGGGCACTTTTCGTGGATTTAAGGATACAAAAACACCATTATATGCTACTGCTGCTGGTAATTTACTCAATGCAGTACTGGATCCATTGTTGATATTCTTTTGTGGTTTTGGCATTGGAGGTGCTGCAATTGCTACTGTGATATCTGAGTATCTGATTGCTTTTGT…
Novel_G000478	Novel_T011938	CATATAGATGCCATTGAAGAGACACGAGAAAAGAAGCTTCTTTCCTCTGTATCCACTTCTTTAGCACTTGCTACTGGTCTTGGAATTGCTGAAGCTGTTATGCTGTCTCTTGGTTCAGGGACTCTAATGGATATCATGGGTATACCTGTTGATTCATCAATGCGTGCACCTGCGGAGCAATTTTTGTCTCTGAGAGCATTTGGTGCTCCACCTATTGTAATTGCACTTGCTGCACAGGGCACTTTTCGTGGATTTAAGGATACAAAAACACCATTATATGCTACTGCTGCTGGTAATTTACTCAATGCAGTACTGGATCCATTGTTGATATTCTTTTGTGGTTTTGGCATTGGAGGTGCTGCAATTGCTACTGTGATATCTGAGTACGTCAACAATGTG…
Novel_G000479	Novel_T011939	CATATAGATGCCATTGAAGAGACACGAGAAAAGAAGCTTCTTTCCTCTGTATCCACTTCTTTAGCACTTGCTACTGGTCTTGGAATTGCTGAAGCTGTTATGCTGTCTCTTGGTTCAGGGACTCTAATGGATATCATGGGATTCATCAATGCGTGCACCTGCGGAGCAATTTTTGTCTCTGAGAGCATTTGGTGCTCCACCTATTGTAATTGCACTTGCTGCACAGGGCACTTTTCGTGGATTTAAGGATACAAAAACACCATTATATGCTACTGCTGCTGGTAATTTACTCAATGCAGTACTGGATCCATTGTTGATATTCTTTTGTGGTTTTGGCATTGGAGGTGCTGCAATTGCTACTGTGATATCTGAGTATCTGATTGCTTTTGTTCTTCTGTG…
Novel_G000480	Novel_T011942	CAAAACCTACCAACAATGGCGTCTTCCGACAAGGATGTTGAAGAACAGCTTTTGGAAGCTGGCAATAAGATTGTTGAACCTCCTACTTCAGTTGAAGAACTTCTACCTCTTCTCGACAAAATTGAGAGTTTGCTGGCAAAAGTTGAACAATCCCCTTCAATATCAATGCAAATTGCACTCACAACATCACTGAAAGCCTTGGTTTCTGATCAGCTTCTAAGGCATTCGAATATTGATGTCAAAGTTTCAGTTGCTGCATGTATTAGTGAAATAACTAGGATCACTGCACCCGATGCCCTTTACGGCGATGACCAAATGAAGGAGGTCTTTCATCTTATAGTATCATCCTTCAAAAATCTCTCTAACAAGTCAAGTCGATCATATGCAAAGCGGGCATCA…
Novel_G000481	Novel_T011943	TGTTGTATCATCAAGGTTATGTGATGTGGGTGCTCGTGTTTTACCGTCCCCGATGCTAAAATATCATGATACTGGCAAAGAATCACGAGTTGATCCAAGGATGGGTCAGTGGAATATGATTAACAAGAAAATGATCAATGGTGGTAGAGTTGATTATTGGGGCTGTGTGAACTTCTCTTCACGGTTGGATCCAGGCTTGCCATCTGAATTTTGCCATCAGTTGGTTAGCATGTGCAATAGCAAAGGAATGGTTTTCAACCCTACACCGCTGTTTCCTGTACGTAATGCACATGCAAACCAAATAGATGGTGCACTTGGAGACATTCATAGCCAGTCTTTAAAAAGTTTGGGACCCCAGGGCAAATCTCTTCAGTTGCTCATAATTATTTTACCTGATAT…
Novel_G000482	Novel_T011944	ATTTCCTCATGTTAGTTTGCTTTCAAGTTTAGAATACCTTAATCTATCCAAATCCGGCCTCACCAATCACATTCCTCCTGGAATCTCACAATTGAGTCATCTGAATACCCTTGACATCTCCCAGAATCATCTCACGGGCAGAATCCCGTCTTTGAGCGTAAAAAACCTTCAAATTCTTGATGTTTCGCAGAATAATTTGAGTGGAGAAATCCCTTTATCTCTCTTAGAAAAACTGCCATGGATGGAGAGATTCAACTTCTCCTACAATAATTTGACCTTTTGTGATTCTAAAATTTCCTTCAAAACCCTCCAAGCAGCCTTCCTTGGGTCAGCAAACAGCTGCCCCATTGCTGCAAATCCGAGTCTCTTCGTTAGAAAACCCAGTAAACATGAGGTCTC…
Novel_G000483	Novel_T011945	CCGGATTAGGCACCATCATGGAGCATGGAGGTGTTGTGTCGAAGGGGATGGCGTCAGACCCTTCAAGTTCGTACCAAAAAATAATAATAGTTGCAGCTATTGCAGCCGGAGTCCAATTTGGTTGGGCTCTACAGCTTTCATTGCTAACACCTTACGTCCAACAACTTGGAGTTTCACATACATGGTCCGCTTTCATATGGCTTTGCGGACCATTATCAGGACTTATTGTGCAACCCACTGTCGGGTACTACAGTGATCGCTGCACCTCTAGGTTTGGTCGTCGTCGGCCGTTCATTGTTGCTGGATCTACTTTTGTGGCAACTGCAGTTTTCCTCATTGGCTTTGCTGCAGACATTGGGCATGCAGTGGGTGATCCGCTTAACAAACCCACAAAACCAA…
Novel_G000484	Novel_T011946	CTTTGCTTTGCTTTTTTCTGCACTCTTTGCCCCATTTGATCTTCTACCATTTCATTCATTGAGATGGCAGACTATGGGAAGTTGGAGAGATGGTTTGAGCAACAATAACAAATCAAGAGTTATTGTTGATGAGAGCATAGAAGAGATGGAGCCTCTTGAACTTCTAATGGGAAGACTTGTGAGAGATGAGGATCATACCCAACTAGAAAGAACAGGATTTGCTTGTCATACAGATTTACATTCCAAAGTATGTTTGACAAACAACCCAACAAGAATCAACAACACCAACCTTGAATTCTACATCTCAACCAACAATGATTCTCAACAAAATAACTTTTCTCCAATCTTAATTCATCCATATGCAAGACAGGAGGACAAAATCACCTTAAGAGATGTTAC…
Novel_G000485	Novel_T011947	CAGTGAGATGGCAGACTATGGGAAGTTGGAGAGATGGTTTGAGCAACAATAACAAATCAAGAGTTATTGTTGATGAGAGCATAGAAGAGATGGAGCCTCTTGAACTTCTAATGGGAAGACTTGTGAGAGGTATGGTTTTTGTTTGAAGTATGAAAAATCATTTTAATTGTTTCTATACAAAAAAGAGTTAATTTACGAACTATTGCTATTGAAAATTGCATCAACAGGGAGTTTGGGACAAAGATTATAAAAAACTATCAAAGTTGCAACGTGTTAATGTTTTACTAATTTTCAAAAACAGAAAACAGTTTGAGTGAAGTTAAATATTATTTGGTGGTTTACATACAGATGAGGATCATACCCAACTAGAAAGAACAGGATTTGCTTGTCATACAGATT…
Novel_G000486	Novel_T011948	GTCGTGTCAGTATTGGATGAGTACAATGTTTAATAGTCAGATAATAGGGCTTGTGAACGGGACAGCAGCTGGGTGGGGTAATATGGGAGGAGGAGCAACTCAATTAATAATGCCATTGTTGTATGAGGTTATTCAGAGAGCTGGTGCTACTCCTTTTACTGCTTGGAGGATCGCTTTCTTCATTCCTGGTTTCCTTCATGTTCTTATGGGCATTTTGGTTTTGACTCTTGGTCAAGACTTGCCTGATGGTAACCTTGCTAGTCTTCAGAAGAAGGGAAACGTTGCCAAAGACAAATTCTCCAATGTCTTGTGGTATGCTGTGACCAATTATCGAACTTGGATCTTCGTCCTCCTCTATGGCTACTCCATGGGGGTCGAGCTTTCCACCGATAACGTCAT…
Novel_G000487	Novel_T011949	CAACTTTTGCATACTAAGGTATCAGATGTGGAGGCTGAGTACTTCCCACCAAAGGAAGATATTATACTTCAAAATGAGGCTCAAACGGATCTCTATATATTGGTCTCAGGCAGTGTGGATCTAATATTATCCCATGTTGATGGCCATGATCATGATCAAGTTATAGGAAGAGCAACAAGTGGAGATATGTTTGGAGAATTTGGAGTTTTATGTCAAAAGCCACAACCTTTCACAATTAAAACCACAAAACTTTCTCAAATATTAAGGCTCAAGAGAACTTCTTTATTGTATATTTTTCAATCAAATACAGAGGATGGGAATATTATAATGAACAACTTTTTCATGAAAATGAAGGAATATGAAAGAATATTGGGGAATATTTGGTGTGATAATGGAGAA…
Novel_G000488	Novel_T011950	GTTACAGATTGGTTTGATCTCAGGAATTTCTTTGGCGATTATCTTATTCCTGGGATTTGGCGCATTTTCTGGTTTATTCAGTGCCGATGCAGAAGTCCTAGAAACTGCACGATCTGGGTTGTTGTTTGTTGCTGGATCGCAACCAGTAAATGCACTGGCCTTCGTTGTAGATGGGCTCTACTATGGAGTTTCGGACTTCGGATATGCAGCATACTCCATGGTGCTTGTTGGATTGGTTTCTTCTATTTACCTGCTCGTGGTCACTCCCACATTCGGTCTCCCTGGGGTTTGGAGTGGATTGTTTCTGTTCATGATGTTGCGTTTAGTAGCTGGAGTCTGGAGATTAGGCACGAAGAGTGGGCCATGGGAGTTGGTTTTCAATGAGGTCGACGGAAAAAG…
Novel_G000489	Novel_T011951	ATAAACACTACTATGTTTATGCTTAATTTTTCATTTAAGGAACAATAACAATACCACATTCTTTCTCAGGCTGAAGTACGTGGTCTTCAGCATGATGGGCTACACCTTCAAGCAAGAAGCCAGAAGTATGGCAAGCTTGAACGTGGTCAGCTGCTCACAGTTTCTCCATATCTAATAAAGAGACGCAAACAACACTTCCATCATTTGGAGCAATATGGTATTGACCTAATACTTGGATGCAATGGTTTTATCTGGATTGGGGAGCATGTTGATCCCAAAGTGGTGGATACGATGATAGAGGATCAAGTTGATAAACCTGAACAAAAGGGTTCGAAATTTGAAGGAACTTTTGGCAACCAAGTGCAAGAAGTATATACTCCATTAGAGACACGACAGAAT…
Novel_G000490	Novel_T011952	GAGGACTGCAGCTTTCTGGAGGGCAGAAGCAGAGGATCGCAATAGCAAGGGCAATGCTTAAAAACCCTGCAATCCTACTCTTAGATGAAGCTACTAGTGCATTGGACTCTGAGTCAGAAAAGCTTGTACAAGAAGCTCTTGATCGTTTTATGATAGGGCGGACCACTCTTGTCATTGCCCATCGACTCTCTACCATTCGGAAGGCTGACCTTGTGGCTGTACTCCAACAAGGAAGTGTTTCTGAAATGGGAACGCATGATGAGCTATTTGCTAAAGGAGAAAATGGTGTATATGCCAAGCTTATCCGGATGCAGGAGATGGCACATGAAACTGCTCTCAATAATGCCAGAAAAAGTAGTGCAAGGCCTTCAAGTGCCAGGAACTCAGTGAGCTCCCCAA…
Novel_G000491	Novel_T011953	CGGTGGTCCATCATGGACAGTAAGGCTTGGAAGAAGAGATTCGACCACTGCAAGCAAAGCTTTAGCAGAGAATGAGCTTCCACATTTTCAAGCAGGTCTTGATCGGCTTATTTCCATCTTTTCAAATAAAGGACTTAGTACAAGAGATATGGTTGCACTCTCCGGTTCTCATACTATAGGGCAAGCCCAATGTTTTCTCTTCCGTAATAGAATATACAATCAAACTAATATCGATGCAGGATTTGCTAGCACACGTCGAAGGAATTGTCCAACATCGAGTGGGAATGGAAATTTGGCACCACTGGATTTGGTCACACCCAATTCCTTTGACAACAATTACTTCAAAAATCTTGTTCAAAGAAAAGGTTTGCTAGAAACAGATCAAGTTCTCTTTAACGG…
Novel_G000492	Novel_T011954	AGGTGGACGAGGCGGACGAGGGGGTGGAGGGAGAGATGGAGGCAGGGTAGGTTATCCAGCCACTCAGCAATTCCATTCTCCGACTCATCAGCCTACTCCGATTGTTTCTCCTCCTCCTCGGCCTACTCCGGTTGCTTCCGCTCCTCCTCCCCAGACGTCAACGGGAGCATCTTCTGCTTCCTCATCGGGAACTGCTACGCTCTTACAGCCTGAGGTTTCTCAGATCGAAGCACAAGTGGAGAAGGTGACACTGACGCCGCAGAACGTTCCGCCGTCTTCATCGAAAGACTTGACTGTGGCGAAGAGGCCGGGATATGGAACCGCTGGTCGAAAAGTTGTTGTTCGTGCCAATCATTTCCTGGTTCAAGTTGCAGACAAAGATCTCCACCATTACGATGT…
Novel_G000493	Novel_T011955	TAGAGATCACTATTATTTTGAAAATAAGAAATGTAATATTAATATTAGTTTGAATTTGATAAATCATATTCATCTCCTCCATCTCTCTCTCTCTCTATCATTAAATATGCAGAAACCAACGAAATTTCAACTAAGATGACGGCTCACCATTTAACACTACCCTCAATCTCTGCCGTACCCACCGTCGCCGGTAACCAAATGAACCACGGCGAGTTCTACAGACTAGCCAAGGTATGGACAATTGCCATTCCTCTCATTTCTTACTCCTACTATTTCACTTCCAAGATCCCCAAGGGAATCCCAAGGCTCCTTGCTCTCTTCCCCGTTCTCTTCATCTTCCTCCTCCTTCCTCTCAATCTCCGCTCCTTCCATCTCTGCGGTCCCACCGCCTTCTTCCTC…
Novel_G000494	Novel_T011956	GGAAAATCAGTGTGAGATTGTTGAGGCTATGCATGTGTATATTAATGGAAGTTGGTACATCCCGAATTGAAATTGGAATGCAATGTGTGACTGACTCTATTTGATTAGATGTGCACTGTTGCTTAAATTTATAGTTATTAAACTGCTATTTTTTGGTTGCAAATGATCAGTTCAATTAACTTTGTAGGGTGATAATGTTCCAGCTCCATTCATGACATTCGAGGCTACTGGCTTCCCTCCGGAGATACTGAGAGAGATATATTCTGCTGGTTTCTCATCTCCTACGCCAATTCAAGCACAAACATGGCCCATTGCCCTGCAAGGTCGGGACATAGTCGCCATTGCTAAAACAGGGTCTGGGAAAACTCTGGGCTATTTGCTTCCTGCCTTCATTCTTCT…
Novel_G000495	Novel_T011957	GGAAAATCAGTGTGAGATTGTTGAGGCTATGCATGTGTATATTAATGGAAGTTGGTACATCCCGAATTGAAATTGGAATGCAATGTGTGACTGACTCTATTTGATTAGATGTGCACTGTTGCTTAAATTTATAGTTATTAAACTGCTATTTTTTGGTTGCAAATGATCAGTTCAATTAACTTTGTAGGGTGATAATGTTCCAGCTCCATTCATGACATTCGAGGCTACTGGCTTCCCTCCGGAGATACTGAGAGAGGTGCGATATCTGCTCCGGAGGAGGAGCATATGTCGTACGCTGCACTGCTATTGCTACACTTGCACATGCAACAATCCCTTGATTTTTGGAGGATGCAAAATGGATGGTTGGAGCCTTTCTAGGGCATCTTTTAGTTGAGTGTT…
Novel_G000496	Novel_T011958	TTTTTTGCCATGAAGAAGTACTCATATTGTATGTTACCTGTTTCATAAAATGTCTCAAAGATAACTTTTGCTGCAAAAGACACTGATGTCTTGGAATGGAATGGAGACTTGCTTGCTGTGGGTGTCACAGAGAAAGATGTGGTGAAGGATGACAACAACAACTTCACGAATTCACTTTTGAAAAAGTTGGACGCAGTCTTGGGTGGATTGTTGGCTGAAGCTTCTTCAGAGGAAGATTTCTCTGGAAAGTCAGGCCAAGCTATTGTTCTTAGAGTTTCTGGTTTGAGCTTTAAGAGGGTTGGTTTATTTGGGCTTGGCCAGTCAGCTTATAGTGCAGCAGCCTTTGTTGGTCTAGGTGAGGCCATTGCAGCAGCAGCACAGGCATCTCGAGCAGTTTCA…
Novel_G000497	Novel_T011959	GTAAAATGCAAATGTCAGCTTGATTATCATTGCTTTCTGCTTTTCTCCTAGTTATAGTTAATATCAATCTTTTTGGGGATTCCTTAACATGTTTGATTACCTGCTACTTGCACAGATTGATCACAGACGTGCTTACAATTGTGAAATTATGCTTTCAAAGGTCAAGGTGCCTTTGCATGATTTAATGAGTTCTGTGCTTGACCTTGAAGATTCAGCTTTGGATATCGATCAGGTCGAGAATCTTATTAAGTTTTGTCCGACAAAGGAGGAAATGGATTTACTTAAGGGGTACACTGGAGAAAAGGAGAAGCTCGGTAAATGTGAACAGGTTCTTAACCAAACTTTT
Novel_G000498	Novel_T011960	CTCCACTCCTTTTCTCTCCATCACCTTTCTCCCTTTCCCTTCTCCAAACACTCTTTCCTTGGCTACCCTCCTCTCTCTCCTTCACTCCGCGGCCATGGCCGTGCTTCCCGTCAATGACTCCGCTAGCTTCGACGATGATGGTTGCCCCAAACGAACCGGTACGTTTTGGACGGCAAGTGCTCATATAATAACTGCGGTCATTGGTTCGGGTGTGTTATCATTGGCATGGGCGATTGCGCAACTCGGATGGATCGCCGGTCCTTCAGTGATGATACTGTTTGCTTTCATAGGTTACTATACCTCTTGTTTGCTCGCCGATTGCTATCGCTCCGGCGACCCGGTCAATGGCAAGAGAAACCCCACTTACATGCATGCAGTTCGCTCCCTCCTTGGTGAGAC…
Novel_G000499	Novel_T011961	TTTTCCTTCCGCCGTTCTCCTCTTCTCTTTTCTTTTTTCCGCCGCAGCCCAGCCGCTCCATCCTTTCCCTTCTCTCCGTTCGCGAAGCAAAACCGCCACCGACCGACNNNNNNNNNNNNNNNNNNNNNNNNNNNNNNNNNNNNAGCCCCGCCGCAAACCGTCGCCTCCCTTCCCTTCCATTTTCTTCTTCCGTCCGCAGCCCTGCCGCAAACCGCCGCGTCTCCCCTACTGAAGCCGGGCGCCGCGACCCTTCTCCTCTTCTCTTCAGTTCGCAAAGCAGCCGTACGCGTCCAGATCTGCCGCCGTCCAGATCTGCACCGCAAGACCGCACCGTTGTCCTTCCGCCGCTGCCCGGTCCAGATTTGCGTCGCCGTGCACAGCCTCACCGCCGCTGCAACC…
Novel_G000500	Novel_T011962	GATGAAGATGATGAAGATGATGATTTTAGCCATGGACATGGACATGGACATGGGCATGGGCATGGGCATGGCTTACCTAACAATATGCTGCCTGGGATGGGTAAAAAAGGAGGGTCATTTGGGGCCAATGAACCCGTGGCATACACGAATTTCAATCCGATGAATGGTAAGAAAGGTGGGGATGGAGGTTATGCAAAGAAGGGTGAAGTTATTGACTTTCCTATTGTGATGAAGAGTAAGGGAGGAGGTAATGAAGGTAAAGGCGGCAAGGGAGGAGGGAAGAAAGATGGTAATAGTAGCGGTAGTGATAGCGGGACGAAGAGTAAGAGCAAAGGAGGAGATCAGAAGAAAGGAGGGAAGAAAGGGGGTGGATTTCTAGGACTAGGTAAAAAGGGGTTG…
Novel_G000501	Novel_T011963	GTAAATCAAACCATCCTGTGGCAGAGTATTTGAAATCTTTGATTGATTGGTTGAATGTCTCTGTAACTGAGGGAGAGATAAACCTCTCTGAAGCCTGCAAAAACAGCTTTGTTCATGGTGTGTTACTCACTTTGCGGTATTCTTTTGAGGAGCTGGATTGGAATTCAGATGTTGTGCTGTCTAGTATATCGGAGATGAGAAGTCTACTGGAAAAGCTTTTGGAGCTTGTGATGCGAATAACTTCCCTGGCACTCTGGGTGGTTTCAGCAGATGCCTGGCATCTTCCTGAAGACATGGATGACATGGTTGATGATGATGCCTTTGTGCTGGATGTTCCAGATGAGACTAATGTGTCCACGTCCTTTTCTGAGCTGGAAGACAGTAAGGAAAAAACTACAG…
Novel_G000502	Novel_T011964	GTAAATCAAACCATCCTGTGGCAGAGTATTTGAAATCTTTGATTGATTGGTTGAATGTCTCTGTAACTGAGGGAGAGATAAACCTCTCTGAAGCCTGCAAAAACAGCTTTGTTCATGGTGTGTTACTCACTTTGCGGTATTCTTTTGAGGAGCTGGATTGGAATTCAGATGTTGTGCTGTCTAGTATATCGGAGATGAGAAGTCTACTGGAAAAGCTTTTGGAGCTTGTGATGCGAATAACTTCCCTGGCACTCTGGGTGGTTTCAGCAGATGCCTGGCATCTTCCTGAAGACATGGATGACATGGTTGATGATGATGCCTTTGTGCTGGATGTTCCAGATGAGACTAATGTGTCCACGTCCTTTTCTGAGCTGGAAGACAGTAAGGAAAAAACTACAG…
Novel_G000503	Novel_T011965	GGGCAGGAAACACAAGTTCTTGACTCTGCGGAGGGGCAGGAAACCCAAGTTATTGACTCTATGGAGGGGCATGAGTCTGAGCATGATCTTGGTGCAAATGAGCAGGCCAGTCTGTCTGTTGTTGTAGCTGATGAACAAGATGATGCACAGCCACTTGTTTCTGCTGGCGAGGAGGCTCAGGAAGAAACTCAGCCCATTCACGCCTCAACCCAGGAGTTGGAACATGATGAGGAAGCTATGCAGGGGCAGGAGTTGCAACCTGATCAAGTGACAACTGAGGAGGAGCATGAGGTGCCAGACTCTCTTACATCCCAGGTGCGGGATGAGTCTAAGCATGCTACAGAACTTGAACAGGATCTACTTCCTGATATTACAAATGAGGTGCCAAGGGTGCAATGT…
Novel_G000504	Novel_T011966	ATAACACAAACAACGAGAAACAAAAAATAATTATCAAACAAAATTATGCTTTTAGTTCAATTTACAAGAACAATAAACATAAATAGTTATCGACATAGTTTTGTTTCTTGTTTTTTTTTTAAAAAAAGAAAGAAACAAGGAACGAAAAACAAGAAACAAGAAACAAAATACATAATTATTAAACATGCCCTTAATAATCAAGTGCATGTAATGAATTTTTATGACCATGAATATTTATCAAAGTTTTAAAGGTTAATTAGAGCAATGCTAGGCAAGAAAATGATTTCGATGCATCGACAGATTTAGAATAGGTGATCTGGAGGGCTCGAGCCTCTGTCAATTTTATATTTTATATATATGTATATATAAATTATAATATCAATACTAATCACTAACTCA…
Novel_G000505	Novel_T011967	TCATGGCCCAAATAAACAGAAGGAATTATTTGGGTTATCTCATTTTTCACCAGTTAGCCGGCTTTTCTCTCAAAAAGCTGTAAATATCGACGTGCAAACTTTTGATGCGTCTTCAACTAAACCTTCCTCCCCAATTAAACTATCTTCCAACTCAACCTCTAACTTACATTGTCTTGAAAATTATGCTTCTCCAATTTGCTCTTCGTCATTGCCAAATCCCACAACTCCCAGTAATATGGTAGGAATAGTAACCATGAGAAAAGAAGATGGTCAATCTGCCAAAGTTAATGATATAGATTCAACTCCTGTAAAGTTTGTTTCAACCTCGGATCAGCTGATGGCTAGCACACCTGCAATGGCTCCACCAAAACGAAGTTCCATGACTCCGGATGACGATTT…
Novel_G000506	Novel_T011968	TCTATATCTACAAAACCTTTATTATAATTTCATGGTTTGAGACTATAAAATACTGCTGTCAACTTTACACATTAAACTCATCACCCGAATCTCTTCAACAATGTCCAATTCCTTCCCTCTCTACCAAAAATTGGCCATCAAAAAACCCATACAAAGATCTGTTGAACTTCTCATTTTGATTCTCGCCATTTCCCTTCTTCTTTACCGTCTCCTTTACCTCCAATCCCATGCCCTCCTTTCGCTTCTCGCCTTCTTCTCCGAACTCTGTTTCACCTTCGACTGGTTTCTCTACCTTCTTTTAAATTGGAATCCCGTCGACTACAAAACATACCCTCAACACTTCAAACAAGTTCATGAGGTTCCTGCGGTGGACGTGTTGGTGACGACTGCGGATTGGAA…
Novel_G000507	Novel_T011969	TTTACTTCTTCCAAAGGACTTGGATTGATCATTCAACATTTTTTTTACTTGAGGTGATGGACCTAATGGAATCATAGTTGGAGCAATTGTTGCTGCTGCTTCTTTGTTGGTACTTGTGCCTGCTATTGCATTTACTCTTTGGCGACAAAGAACTCCACAGCAACATTTCTTTGATGTACCTGCTGAAGAAGATCCTGAAATTAACCTGGGGCAGCTAAAAAAATATTCTCTACGCGAGCTGCAAGTTGCCACTGATTATTTTAGCCCACAGAACATTTTAGGCAAAGGTGGATTTGGCAAGGTCTATAAGGGTCGTTTGGCTGATGGTTCTCTTGTGGCTGTAAAACGATTGAAAGAGGAGCGAGCTGAGGTTGGAGAGCTTCAATTTCAG
Novel_G000508	Novel_T011970	GTACTGTTTACAAAGGAGTCTTAGAAGATGGCTTGGCAGTGGCAATCAAGAAATCGAAACTTATAGACCAATCCCAAACTGATCAATTCATTAATGAAGTTATTGTTTTGTCTCAAATCAACCATCGCAACGTGGTCAGACTCTTGGGATGTTGTTTAGAGACACAAGTCCCGTTGTTGGTGTATGAGTTTGTAACCAATGGCACCCTCTTTGAACACATCCATGACAAAACCAAGCATGCTTCACTTTCGTGGGAAGCCCGCTTAAAAATAGCATTGGAGACTGCAGGTGTGCTTTCGTATTTACATTCGTCAGCTTCCACTCCAATTATTCATAGAGATGTCAAGACGACCAACATACTTTTAGATAATAATTACACTGCAAAGGTATCCGATTTTG…
Novel_G000509	Novel_T011971	TAATACTGCTTTTATTCGCTCTAATATTTTAATTCTCAACCGTGAAGAGATTGATACATTGTGGAATGCTAAAGATAAATTTCCAAAAGACTTCCGAGCAGAGATTCTTTTCTCTGAGATGGATGCTGGAACTCGTACTGTTGCAAATGATGTACTTTGCATTGAGGAAGAAGGTCTCCCCATGGAAGCATTTGCTAAAGTGCAAGAGATCTTTAGTCATGTGGATTGGTTAGATCCCAAGGCAGATGTTGCCCTTAATGTGCTCCATCAGATGAATGCCTTAAACATAGCCCAAGAGAAGCCAGACAATAATTCTCTTTGGAGTACGCAAGTTAGTTCTTTACTTCAGTGTGCAAGTCCCAGAAAACTTCCACAGAAGTTCACATTGGAGAACAGAAG…
Novel_G000510	Novel_T011972	CAGCAACAGCAACAGTTATTTGAAACAAGTTTAGAACAAGGGCCAAGTCAAAATGATGATGTTGATATGGATGATGACACTGTTCCTGTGGTAGTTAAGCCAGGTCACATTCGATTTGAGCCAGTTGGAAAAGTTGTGACGGATCAGGCTGGGCAGGAAAAGCAAAACCATTTCCTTAAGGAAACATTGCATTGGAATGGCATCACCAACAAAAAGAAGGGCCAAAAATGGGGCAAAGAGAAAACTCCATCTTGGAAGAGGAACAATTCTAACGATTGTAGCAGCGAACCTCTTCAATTACTTTCTGAAACTGAGCAACCTAAAACTCCGGTTCCTGTAGTTGGTTCAATAAATTTTGATGAACTTCGACCATACACTGGCTTGCCTCAGGTTTGGTTT…
Novel_G000511	Novel_T011973	ATTTAATATGACACGAAAAGATTTGCAAGAAAATTCGCAAAGTGGAATTCCCGCCATGTTCTTAGCAACAGCTTATGACAAGGCATCCGAGGCTTGGACCAAGTTTTCACCAAAAGTTTCGGAGCTCAAAAGGTTGGCTGCTTATGCTAGAAGCAGCGCAGATTTGTTGACAAGACTAATGTTGCAGCATCAGGTCGATTCTTGTCTGTGGGAGTCCCTTTTCCGAACTCCATTGACGAACTATGACGCTGTTATTCTTCTCCATAGAGACAAATTACCTTACCCACAACACCTTCTCTTCCCATCTGAACTTAACCAAGGAACCCATGTCGCAAAAGGGAATCCTACCAAAATCTTCACTCCATTCTTATCTCCTAGAAACTTGAAAGCAAGTTCTGA…
Novel_G000512	Novel_T011974	TGCAGGTTACCCAAATGGTTAAGGTTAAGACAGGCAGCACCACTCTAGCAGTTGGTGATGGTGCAAACGATGTCGGAATGATCCAAGAAGCGGATATCGGGATCGGTATTAGTGGTGTAGAAGGGATGCAGGCAGTCATGTCAAGTGATATTGCAATCGCACAGTTTCGATACTTGGAGCGGCTGCTCCTTGTGCATGGTCATTGGTGTTACAGAAGGATCTCATCCATGATATGCTATTTCTTCTACAAGAACATTGTTTTTGGGTTCACTTTATTCTTCTTTGAGATGTATGCATCATTCTCCGGCCAAACTGTATACAACGACTGGTTCCTTTCGCTGTATAACGTCTTCTTTACTTCTCTCCCTGTGATTGCATTGGGAGTGTTTGACCAAGACG…
Novel_G000513	Novel_T011975	ATGGAACATGCTTTTGTTTAGTTGCTTGATAATCGAAATTGATCAAGGTTTATGATGCAGGCAAAAACCAAGGGAGGAATGAGTTTGTGATTCGCTTGCAACCTTCGGAGGCCATGTACATGAAACTTACGGTCAAGAAACCTGGACTGGAAATGTCAACAGTACAGAGTGAATTAGACTTGTCTTATCGCCAACGCTACCAGGGTGTCACAATTCCAGAGGCATATGAGCGTCTCATCCTTGATACAATAAGGGGCGATCAGCAGCATTTCGTTCGTCGAGATGAGTTGAAGGCTGCCTGGGAGATCTTCACACCATTGCTGCACAGAATCGACAATGGTGAGCTGAAGTCAATTCCATACAAACAAGGGAGCCGAGGTCCAGCTGAGGCTGATGAGC…
Novel_G000514	Novel_T011976	CCTAGTTAGGGAAATATTAGAATAATTAGTATAATTAAGTAGTAAGGGTGTTATAGTAATTGGCTATAGAGTTTGAATAGTAGGTGAAAGGAAGGTCAGAGATGTGAGTTTTGGTAGAGAATAGCCCTCTTGAAAAGCTACGGTATGTTGTAGGTTCCTCATTGATATAATCTATTAAGTTTGTGTTCTTGGGTTCTTTTTTAGGAGGTATCTAAACAAAAAGGTTTCGACTTTCGACCAAAAATAGGTCGGAAGAGCATTGCTATCTTCTTGTAGATATAGTTCTTAACTTATTATGTATCAGACACTGATTTTCGACATTCTATAACTAATTTATGTCTTATATTAACTTATTTTACTCTAAATGTAAAGCAATCCCTACTTCTACTTATACAACTT…
Novel_G000515	Novel_T011977	TTCATCATAATTTCCCTAATAAGACTATACCCAGCCCTAATTTCAGTAAATGTTTCAAAATACCAGCATCGTGCGTCGGTACTAACCTCTCGCTTGCCTCCGTAGTCAGCTCTCGTACGCCTGCTGATGTTTTTCCCCTCTCCTCTTAAAATTCGTAAGATTGAAATTTTATTATCTTTCAAATTTTCATTTCTTCAAGTTCATGGCTTGTGCTTGTTTGATTTTGTATTTATG
Novel_G000516	Novel_T011978	TCGTTCTTCACCAACCACATGTCGGCCAATCCATGTCTGACAATCCTCGTTTCACTGCCAATATAGTGCTTCCATATCCATTGGTTATCACAGCCGTAAAAGTTGTTGGAACCTTAGATGACAATATCCATCTTCAATCTATCACAGGATTTTTACCGTTTTCACTACCTCCATCATTTAGCCTTCTTCCTCATAGATTTAATTCCGTCAATTTGAGCTTAGCCACCATCGTTGGAAAATTCTCTGAGGTTTTTTCCGAAGGGTCCTTGAAATTGAATTCTTCAACTGATGTGAAGAAAAATCCCATTGTTAGATTTAATTACTATTCTCATCCTGACGATCTTGCTAAATGTGTTAGAGGAGTAAGAAAATTTGGAGATTTTCTTAAAACTCCAACAA…
Novel_G000517	Novel_T011979	CTTTCTTCAACTTCAAACCCCATCCGGATCAACGGAGTTGAGTTGCTGAGGATTCCAAAGGTTTGAACATGGCGAGTACAAACCCTGCAGCAGGTTCTGGAACCGACGCCCCAAAAATTATATGGAATCAAGCTCAACGGAGGTTCGAAACAGAGGACAAGAAGGCATATCTTCAGTACCTGATAAAAAATGGTGGTAAAGTTATGGATATGATTCACACTTTCGTTCCTTCTTCCAAAAGGGGTTTGGGATTGGCTTCCCATCTCTGCCTCGCCGCTTTCAATCACGCTGACGCTCATTCCTTATCCGTCATTCCCTCCTGTTCTT
Novel_G000518	Novel_T011980	TGCATTCAAGAGACTAAAATGAGTTTGTAGCTCTGATGAAGCACCATGAAGATGCTTTTGTTTATTTCAACCAATACATTATAGTGTGTAGCTCTAATAGCATTAGATCAAATTACCTTAGTTTTCCTATTTAAGAAAAATTGTACTTGTGCAAAATAAAAGAAGAAATTTGATACAACACTGGTGCTTCATTAGAACTACAAACTCAGAGACTTCCTATTTTTTTTCACCCCAGGCAATTGATCGTTTCCGTGGAAGTCAAAATGGGATACTGATTGCCACTGATGTTGCGGCTAGAGGCCTCGATATTCCCGGTGTTCGAACTGTTGTCCACTATCAACTACCACATTCAGCTGAGGTTTATGTTCATAGAAGTGGAAGAACAGCCAGAGCTTCTGC…
Novel_G000519	Novel_T011981	GCAGTAGACCAGATTTGCTTGATGCCGCACTTCTAAGACCTGGCAGATTGGATCGCCTTCTGTTTTGTGATTTCCCCTCTCCAGTGGAACGGCTAAATATTCTTCAAGTTCTTTCGTCAAAGCTGCCATTGGCCAATGATATAGATTTGGAGCCAATCGCATATATGACAGAAGGATTCAGTGGAGCTGACCTTCAAGCTCTACTCTCAGATGCTCAACTTGCAGCAGTTCATGAGCATCTCGATAGCATAAACGCTAATGAACCGGCTCAAAAGCCTATCATTACTAA
Novel_G000520	Novel_T011982	TGTGTGCTTCCTGGTTATGTCGTTGAAGGTACACTAGCTAAGACTATAATCAATGAGCCAAAGGAAGTCACCCTCATGAGTGGACTCATGGCTCCTCTCAACATGCAGGTTCATTACATTTCTTTCTCTGCCCATGCTGACTTTGCGCAGACGAGCGCATTCTTGGAAGAGCTCATGCCACCCAACATAATTCTCGTCCATGGAGAAGCTAATGAGATGGGGAGGCTGAAACAGAAGCTTATGTCCCAATTTGCTGATCGGAATACAAAGATTCTCACTCCGAAGAATTGTCAGTCTGTTGAGATGTATTTCAACTCCCAGAAAATGGCAAAAACTATTGGAAAATTGGCTGAGAAGACTCCAGACGTTGGCGAAACTGTCAGCGGTTTACTAGTGAAG…
Novel_G000521	Novel_T011983	TTTCTTTTCCCGATAGCCACTCGGAAGTAATTAAGGTTCCTGTAAGTTGGGAAGCAATGGTTAAACTGGTGGAGTGGTTTTACTCAGATAAGCTGCCAGATCCTCCATCTGAGTGTCTATGGCATAATATGGATGACCAAGAAAAGTTGAATGAAGTCCAATCGTATGTAGAGCTTTGTTGGCTTGCCGAGTTCTGGTTTCTGGAAGATCTTCAGGAAGTGTGCTTGAATCTAATTGTATCTTGTCTCGAAATAGCCCGTCATTTGTCGGTCAATGTACTTCAAATGGCTGGAGATTTCTCGCTATGGAAGTTGGCTGAAATTGCAGCAGATATTATTGCTCCATTATATTCTCAACTCCGTAATTGTGGTGATCTTGAAGCACTTGATGAAAGGCTCC…
Novel_G000522	Novel_T011984	AGATGATCAGCATGGCTGTCCACCGTAATCTACTCCGTCTTAATGGATTTTGCATGTCACCAACTGAACGATTGCTTGTCTATCCTTATATGGCTAATGGAAGTCTAGCATCATGCTTAAGGGAGCGTAAGCAATCCCAACCACCACTCAACTGGGCAATACGTAAACAAGTTGCTTTAGGGGCTGCACGAGGACTTGAATATTTACATAATCATTGTGATCCTAAAATTATTCACCGTGATGTGAAAGCTGCAAATATATTATTAGATGATGAATATGTGGCTGTTGTTGGAGATTTTGGGTTGGCTAAACTCATGAACTACAAGGACACTCACGTCACAACTGCTGTTCGTGGAACAATTGGGCATATACCCCCAGAGTACCTCTCGTCTGGAAAGT…
Novel_G000523	Novel_T011986	TTCTGGAGATGGTGTCAGTCACACAGTTCCCATCTACGAGGGATATGCACTTCCACATGCTATCCTACGTCTTGATCTTGCTGGCCGTGACCTCACCGACGCCCTCATGAAAATTTTGACTGAGCGTGGTTATTCCTTCACCACCACAGCCGAGCGTGAAATTGTAAGAGATATGAAGGAAAAGTTGGCCTACATTGCCCTTGACTATGAGCAAGAATTAGAAACCTCCAAGACTAGCTCTTCTGTTGAGAAGAGTTATGAGTTGCCTGATGGTCAGGTGATTACCATTGGCGCTGAGCGCTTCCGATGCCCAGAAGTCCTCTTCCAACCATCCATGATTGGTATGGAAGCTGCCGGTATTCACGAAACCACATACAATTCCATCATGAAATGCGATGT…
Novel_G000524	Novel_T011987	GGAGCTTTTAAATTCAGAGGTGCCTGCAATGCTATATATTCACTTGATGAGGGCGAGGCTGCTAAAGGGGTTGTGACACATAGCAGTGGCAACCATGCTGCAGCTTTGTCTTTGGCTGCAAAACTGCGAGGAATCCCTGCATATATAGTTATACCAGAAAATGCTCCAAAATGTAAAGTTGAAAATGTGATACGTTATGGTGGTCAGATTATTTGGAGCAAAAGCGCAATACAGTCAAGGGAATCGGTTGCTGCGAGGGTTATGCAAGAAACTGGTGCACTTCTCATACACCCATATAATGATGGGCGCATAATAAGGTAAAATAATGTTAATATTGTTTTGTTTAACTGTCTTTGGAAGTACTCATGATGATTTCTCAAAGTACAAATCTTTATTTAC…
Novel_G000525	Novel_T011988	TCCTAAGCCACTTGCATATATACCGGAGATTATACTGAAGAAAAGAAAGGTAAATGAAGCAGCGGCATTGAGAAGAAAGGAGCAGTTGGAGTTAAGGAAGCTTAGTTCGAAGAAAAACAAGGATGGTTTTATTAAACTACCTGAGGAATTTGTCAGAGAATATCGTGCTAGGGAACTGGACCTTGTCAAAATGAAGCACAGGATAAAGAGAAAAAGATCTGCTATTGTGCCATCAACATCTAAATTGATTTTTATAATTCGGATACAGGGCAAGAACGACATGCATCCAAAGAC
Novel_G000526	Novel_T011989	TCCTAAGCCACTTGCATATATACCGGAGATTATACTGAAGAAAAGAAAGGTAAATGAAGCAGCGGCATTGAGAAGAAAGGAGCAGTTGGAGTTAAGGAAGCTTAGTTCGAAGAAAAACAAGGATGGTTTTATTAAACTACCTGAGGAATTTGTCAGAGAATATCGTGCTAGGGTAACTCATCTATTTTGAATTTCATTGTGATATGTGTTTAATTTTTGTGTTTTGTTTATCTATCACATCACATGTAATATCCTTTTGAGTTTGCCTTTGGGATATCAAAGGGTAGATATTTTGATGAAGTTTGCATTTTTCTTTGACCCTTTTATACATTCAGTTATATGATATAAATCTCCAGCACTTATTCTTCTTACGTGCAAATTATTGTTTTTATTTTTTTG…
Novel_G000527	Novel_T011990	CTTCCACTCTCAAACCCCCCCTTTCTTTTAACCTAATTCTCCATCGCCGATTTCTTCATTTCCAATTCGACGCTTTCCCATGGCTTTGCCCGACCAGAAGACTGTTGATTATCCTAGTTTCAAGCTCGTCATTGTTGGTGATGGCGGCACTGGGAAAACAACGTTTGTGAAAAGACATCTCACAGGGGAGTTCGAAAAGAAATACGAACCAACCATTGGCGTGGAAGTGCACCCTTTAGACTTCTTCACAAACTGTGGAAAAA
Novel_G000528	Novel_T011991	TGGAGGATTTAGAAGTTGAAATGGAAGAATCAAATATGTCATTCTCAATAAGTATAGATAAAGGAAGAGGCTATGAATGGGGCACTCGAAATGGTGTTTCAAGTCTTTTTGCACAAAAGAACAACATTCTTGACCTTTCCTTTTGGCAAATGATTCGAGAAATAACCAAATTTAACGACGATGTCACCGATTATCTTAAAGCTATGGAAAACAAGCCAGGGTTGGATCAAAATGAAACCTTACGACAATTTCTTAACTCAAGGGACTATTCCGAAGTTTTTCAAACTGCTT
Novel_G000529	Novel_T011992	TTTTAATTAGCTAAAGAGAACAAAATTTACTAAGCGTAAATACAAAATTTTTTCCTGGGGTTATTTAACTGTGGGACTGACTTGTTTAAGTTCTTAATTTGTCTTTTAGGTTCCGTAAATGGTGCAAACTGCAAAGAACTGGCAGCACAACCTGACTTGGATGGATTTTTGGTTGGAGGAGCTTCGCTTAAGGCCGAGTTTATTGACATTATTAAGTCTGCTACGGTGAAGAAATCTTCATGAATTGCCTGAGGACGAGATGGTTTAATCTTCCTTTAAGTACGTGATATGTTGCGGAAATTGTTGTTTGCTTGAGGAATAAAGTTTGAGACCCAATGCTTGTATAATCATCATTTTGTATTCTCTCCTTTTTGATACATTTTGACATAAATTTGGCAT…
Novel_G000530	Novel_T011993	CAGATACGCAATGACTGGACAATTGAATTCCAAGAGTGATGTGTACAGCTTTGGCGTTGTCCTGCTTGAACTTTTGACAGGAAGAAAGCCAGTTGATCATACATTACCTCGAGGACAGCAAAGCCTCGTGACATGGGCCACGCCCAAACTTTGCGAAGACAAAGTTAAGCAGTGTGTTGATGCTAAACTTGGAAATGAGTACCCTCCTAAGTCAGTTGCTAAGGTACCCCATACGCATACTGTTATTTTCTTGCTTATGTTTGGTAATCATATCTCTCCTTTTTCTATCTCTCTCCTTACTTGTCT
Novel_G000531	Novel_T011994	GTGTATGTACTTGTTCTCTAATAGGGATGGTTCTCTTCGAGATTTGAGAGCTAGTTCAGGGGATCCTACCAGAAGTGGGAGCAATAACGAAACATTAAGTACTGTTAGTAATAGAGAGAGAGAGGCTGCATCTAATCAGTATGACAAAACAAACAGTTATAGTAGTGAAGCATCACACTTCCAAAGTGGAGTTCTGCGTACAAACTGCATTGATTGTTTGGATCGAACAAATGTTGCCCAATATGCCTATGGTCTTGCAGCTTTAGGCCGCCAACTCCATGCAATGGGTTTGACAAATATGCCTAAAGTGGATCCTGATAGTAGCATTGCTGCAGCCCTTATGGATATGTATCAGAGCATGGGGGATGCTCTTGCTCAACAATATGGTGGCTCTGCTGC…
Novel_G000532	Novel_T011995	CTCACATGGTACAAGGTGAGCGAATTTCAAACTAGCATCCTTTAATTTCTACATCTTTTTTTATTGTGAAAACTTCACCTGTGGAATCCGCAGACCACTTTCAATACCCCGGCTGGTAATGAACCATTGGCTTTAGACATGAGCAGCATGAGTAAAGGTCAAATATGGGTTAACGGTCGGAGCATTGGCCGCTATTTTCCTGGATATATTGCAAGGGGCAAGTGTAACAAATGCAGTTATACTGGATTCTTTACTGAGAAGAAATGCTTGTGGAACTGTGGTGGACCCTCTCAGAAATGGTATCACATTCCCCGCGATTGGTTAAGTCCAAATGGCAACTTATTGATAATTTTGGAAGAAATTGGTGGGAATCCTCAAGGGATTTCTTTGGTTAAGAGG…
Novel_G000533	Novel_T011996	CCCCCCCCCCCGCCTGCTTCCACCAAAGGCTCCCCTTCATCTGTTCCTTCTGCTCCCCCTCCTCCTACCCTTTCTGGGAGAGGGCCTTCAAAATCAGGTGAACTGTCTGGTTCTCTTCTTGGAAATGGTTCATCTACGTCTTCCTCTCCTGTGCCACCAAGTGGTTCTCCATTAGGTATAAAGGGACGGACTTTGTCACGCACCATAAGTTCAAGAACACATATAACCAAGAAATTGAAGCCACTGCATTGGTTAAAGTTATCTAAAGCAGTGCAAGGAAGCTTATGGGCTGAAGCCCAAAAAACTGGTGAAGCTGCCAGGGCACCGGAGATTGACATGTCAGAGCTTGAAAGTCTTTTCTCAGCGGCAGTTCCTGCTCCTGATCAGCTCCAAAAGTCG…
Novel_G000534	Novel_T011997	TTGCCAGCATTGGTTCAGAGCAATAATGCATCCATCCATAAGCCTTTTCCCAAACTCAAAATTCTACTCAAGTCAGATCTCAGATGGTCCTAATGTCAAACCTAAAGCCTATGAAAAGACGTTTATTCTCGGACCGATGTTCGGTTCGTATTCTTTCATAAACATAAATGGTGCACGAGAAGAAAAGGATGAAATTGGACACAGTTTGAAAAACATGGTAGAGGTTGATGTTGTGCTCAAAATTGTTCATTCTTTGTCTCAAGGTATAATATTTTCTCTATTTGATCTTTGTTTTCG
Novel_G000535	Novel_T011998	TACATCACTACTTGTGCAAGTATTTATAGATATATTTATTTGTACGTTTGAACCTTTTTGTTCTTTGCGAATGGTTATTTGCAAAAATGTTTTACTGTCTGATGGACGTTCGACAACTTTAGTGGTATAGATTTATATTTGATTGCTTTTTTTTTCTATACAGTAGTGTACTTCGTTCAAGTAATATCATGTAAGATTCTGGCCTGCACATAAGCACACCTTTTCCTCCTTAATTCTTCCCCTCTTGCCTCAATGTTCTAAGCCATGGTACAATTAGTAATATTCTCACATTTATTTTTCAACTTGCAGATTTTTGAAAAGAACCCAACAAAGATCAAGAACTATGGTATTTGGCTGCGATATCAGAGCCGAACTGGTTATCACAACATGTACAAGGAG…
Novel_G000536	Novel_T011999	CAACAAAAGCACCTGTAATGAATTTTGCATCAGAGACATCCCTTGGTGCTGTCACAATCAGAGCTTTCGACATGACGGAACAATTCATCCAGAAGTTTCTGAAGCTCATCGACACTGATGCAAGTCTTTTTTTCAACTATAATGCAACGACGGAGTGGTTTGTTTTGAGGATAGAAACGTTGCAAAATTTCACCCTTTTCACTGTTGCATTTCTCCTTGTACTGCTTCCTCAGAATCAAACCACCAATCCAGGCAAGTCAAACCCAACAAGAACACAAGACTCTAACTCTTTTGCGTACCACTTTTTGACCGCTTAATCCATTGTGCAGGACTTGTGGGACTCTCTCTTTCTTATGCTTTATCCTTTGCAAATATACATGTTTTCATGGCGAGATATTA…
Novel_G000537	Novel_T012000	TGGTGAGTAAGTTACAGCTTAAAGTTAGAACACAAGAATGAACAAACAGTTGGAGACCACAAAAAAGTCTCTTATGGATGAACAATAGAAAAATGTGATTGTTGCAAACTTCATCTTTGTTTCCAGGTGCCTTTACACCAAATGAAGAGCTAGCAAGCGAGGTACTTTCTGCTGCAGAGAGGAGTGGTGAGAAACTATGGAGGTTGCCAATGGAGGAAAGTTATTGGGACTCAATGAAGTCAGGTGTTGCTGATATGCTCAACACTGGTCCTAGTCAAGGAGGTGCAATAACAGCTGCTCTATTTCTGAAACAGTTTGTTGATGAGAATGTCCAATGGATGCACCTTGACATTGCTGGGCCTGTTTGGAATACTAAGAAGAGTATTGCAACTGGATTTG…
Novel_G000538	Novel_T012001	CAAAAACATGCAGCTGAAAAACAAATTGCTACAATACAATAAACAACGACATGGGAAAGACGATCGAAATTTACGGATTTCGGCCCCAGGTGACCGCCGACGAGGTGAAAGAATTTCTCGAGAATCACACTGGAGATGGAACTGTATCAACGGTGCGGATTTCGAAACCCAAAGACGAAAAAGCCCGGTTCACATCTGTGACTGTCCTGTTCAAGAGCAAACTAGCAGCTGAGTACATAGTGGCGAAGTCGACAACGGAGGAGAGGAAACTGTGGTTCGAAAGTTCATATTTGAAAGCCAGAGAATTGGAGAAGGCGGTAGTGGCGAATGAAACCAAGGGTGTTCTCGAAATGGAGAGAATGGAAGACGTGAAGGGGCACTTGGGAAGCATGATTTCGA…
Novel_G000539	Novel_T012002	TTTCGGTCCGCGGCGGAATCCGACGTAGTTTGGGGGAGATTTTTGCCGGAAAACTACGAGGAAATTGTGGCGGCGTCTGAACTGTCCGGTGAGGCTCCGTTGAGATCGAAGAGAGAGGCTTTCTTCAGACTGTGCTCTCCGATCCTTGTGGACGAGGGTAAAAAGAGTTTTGAATTGGAGAAGTTATCAGGGAAGGTTATATATATGTTATCAGCAAGGGAATTGAGTATCACATGGAGTTCTGATCCTCTTTGTTGGACTTGGAAATCTCATCCTCAATCAACATTCCCAGAAGTGGTGGAGCTAAGAACAGTGAGTTGGTTAGAGATTAATGGGAAAATAAGAACCAAAACGCTATCTCCAAACACAAAATATGGAGCTTATCTTCTGTTCAAGATT…
Novel_G000540	Novel_T012003	CCTATCTTCAGCTTCAGTGAGAAAATCGTTTATCCGAACGGAGCAGAGATGTTCGATTCTACGCCCCTTCACTGCCCTTTCACCACGATTTGCCCGTTGCTGCAACACAGTTGCCATTACAACTCTTCAATTTCCACAAAATTCCGCCCCCCCCACCTCAACTTGTCTCTTATCCAGGCCTCTGGACCAATGGGGTTTCCTGTTTTTGCGGTGAAGAGGTTGGGGAAAGGTGGCATTGCCCTCACTGAGCCAAGTGATTCCGACATTGGCTTTGATGAATTTTTCGATGAGGGTGAGGATAATTTTCAGGACGAGGATGATATTCTTTTGCCGTTAAAGAACACGAAAGAGTGGCATGCGGCGAGGCCTCGTGGATTTGGAGAAGGGAAGGTGTATGAT…
Novel_G000541	Novel_T012004	CTCTCTCCTGCTATTCAAAATCTTAGTACTGCCACATCGATGAAGATGACCAAGGTTTTCCAAGCGTTTCTCATGCTCCAACCCCAACTCGTAGACCTTATCCACGAGATGCAGCCAGATTGTATCGTTTCTGACGTCTTTTACCCATGGACGAGTGATGTGGCAGCCGAGCTCAGAATCCCACGGCTTGCCTTCAACGGTTCAAGCTTCTTCAGTTATTGTGCGGAACAATGTATAAAGGAGCATAAGCCACATCTTGAAGTTGAATCCAACAATGAAAAGTTCAAACTTCCGGGGTTGCCTGATGTTATTGAAATGGTGAGATCTGAGTTGCCAAGTTGGATCACTAGACATAAACCAGATGGTTTCTCACAATTGCTTGATGTCATTAGAGAATCA…
Novel_G000542	Novel_T012005	ATTTGTATGGCGGCTTTCTTGGGTGTTGCTTTCTTAAGCATGGATATTGGAATCATGCTTTCGGTGGGACTTGCTTTGCTGAGAGCTCTTCTTTACATGGCTAGACCAGCTACTTGCAAGCTCGGCAAAATACCAAACTCCAATTTGTACAGAGATGTGGAGCAATATCCTAATGCAACTAGAAACCATGGGATTATTGTTCTTCAACTTGGTTCCCCTATTTATTATGCCAACTCCAACTACATCACAGAAAGGATTTTCAGATGGGTTCGTGATGAGCAGGGCAATTTCGAGGATGGACCTGTGGAACATGTACTCTTGGAGTTGAGCGGTAATAAAGCTACAAAAACCCCT
Novel_G000543	Novel_T012006	ATTGATGATAATAATAATGAATACCCAATGTGATGACTTTATTTTGCTCTTGTGAAAAGATGGTTAGTATGAAATGTAATGAAACGTAGGAATGTAGCCTTTACCTAAAAGGCAATCACTTTTGAGTAATAACTTCTTAAGATCGCTTTTGTCTTTGGATAGAATGGAGAAGATAGATTTGAAAAGAAGCAGCAGCATTGTGAAAATAGTGGGCTCAGCGGTGTCCATTTCAGGTGCTTTGGTCGTGGTTTTGTACAAAGGCCCAATCGTGATATCAAACCCATATTCTCCTGGCCCAAAACAATTGGACTCTTCACATCCTCAGCCCAATTGGATAATGGGTGGCCTTTGCTTTGTTTTTCAGTACCTTTTCAATTCCTTTTGGTACATTCTTCAGAC…
Novel_G000544	Novel_T012007	GTTTAAAAGTTCTCAGATAGCAGGACTGACAAACAACTCCTACCTAGCTGAAGGACATGAAATACGTCACTGTGTACAGAAACACAAGAGTCTTGGTCAACATGTTCTTCATGTGGCAAAGAAGAGGTTGGATGCTATGTTATATGTTGGTCTAACTGCGGAACAGAAGGAATCTGCGACGATGTTTGCAAATGTGGTTGGTGCACAGGTGATTTCACAGCTAAGAGACGCCAAATTTAGCATGGACACTTCAGCTGACAATCAATCAGGTTTATGTTTTGTTCTGTAGCTTTTCATTCAAAGAGGACAACTTTTAAT
Novel_G000545	Novel_T012008	TGCTTGCAAATTATGCACAGACACCACGACAAGGAATGACACCTTTTCGAACTCCCCAAAGGACGCCGGCAGGGAAGGGTGATGCTATAATGATGGAGGCAGAAAACCTTGCTAGGCTGAGAGAATCTCAGACTCCATTATTGGGAGGAGAGAATCCAGAGCTGCATCCTTCAGATTTTTCAGGAGTCACCCCAAGGAAAAAGGAGATTCAAACACCAAATCCTATGTTAACACCCTCAGCAACTCCTGGTGGTGTTGGTCTCACTCCTCGGAGTGGCATGACACCAGCTAGGGATGCTTACTCGTTTGGCATGACTCCAAAAGGTACACCTATTAGAGATGAGTTACGTATCAATGAAGATATGGATGCACATGATAGTGCAAAACTGGAGTCTCAAA…
Novel_G000546	Novel_T012009	GTCGAACCCCATAGAAAAAGTTGTCAACTTTTCAGCAGTCTCAGTGTTTTCATATCTTCAAGATCACTGTCTGCTTCAGTTATTTGGTCATCCACAATGGCTTACTGTCAAATCGAGTTCAAATTCTTATCTGAAGAAGCTACAAAAAGCACTTGAGAGTGCAGGATGTCAAATAAGAACTTGCTCCAAAGTTAATTCCATCTCAACTACCAAAGAAGG
Novel_G000547	Novel_T012010	CGAAATTGGAAGCAACAATGATATCTTCAACTGCTGCCAAAATAGGGCGACCTTCTTCTTCGCCATTATCACTTCTCCTTAAACCTCAAACTTCTCGCCGGATTCTTACTCCCTCCGCTTCGTTTTCCTCCTCTCTTCCCTCTCGCAAACTCATTCTCTACTCCAAACCCGGATGCTGTTTGTGCGATGGCCTCAAAGAGAAACTACACGCTGCCTTTCTCCTCTCCGGCCCCGATTCTCTTCACGACGTCCATTTACAGGTGAGGGATATCACTACTAACCCTGAATGGGAGAGAGCTTACCAGTATGAGATTCCTGTGCTTGCCAAAGTCCGCTCTGATGGCTCGGAGGTTGGTTCTATTCATTCATTCTTGTCAATTCTGATTAGCACCACCCGAT…
Novel_G000548	Novel_T012011	TGTTAACCTCAAGGGCTTATTGATTGGAAATGCAGCTATCAATGATGAAACAGATACAATGGGAATGGTGGAATATGCATGGAGTCATGGCATAATATCAGATCAACTCCATTCCAATATCTTCAAAGAGTGCAATTTTTCACTTGACATTGAAAACCTAACTCTTTCTTGCCTTAATCACTATAGAGATTTTCTAGTTTCTTACTCCAAAATTGATATCTATAACATTTATGCTCCAATTTGCCTCTATGCTTCCTCCTCCTCCTCTCTTGCCTCCTCAGTGTTTAGACTCTTGGGTTCTGCTCCTCAAATCTTCTCAAAATATGTA
Novel_G000549	Novel_T012012	AGCACCATGGTTTGTTTGGTACTCGAAAAACTAAGTTGTTACTAAGAAAGCAAACGATATCAAAGAAGGAAGATGATGAGAGGGCCACTCGAATCAATCAATGTCCTTTAGATTGTAAAGATGATGGAGACACTGGCTCCTTACCTCTGACAAAGAGATTTGGAAACTCTACTTCTCTGGCTGCATCAATTACAACTATGGAGTTTCAAGGAACGTTGCTTCAAGAACTCGAAAGTAAGGGCAATCAAGGTCGTCCGACTGATTCTCTTACTATGCCTCAGGAACCTTTAGACGTTGCCACTGTTGCTAAGGCCATTAGTGTTATTTCCTGCGTCTATGAGGACAATACAGAGTGGGGTAAAAGAGTGGGATGGATCTATGACTATTTGACAGAAGATG…
Novel_G000550	Novel_T012013	AGAGGACTATGTTATCTACACGAAGGGTGTAGTACTCAAACCATTCATTGTGATATTAAGCCTCAGAACATCCTTCTGGACGAGTCGTTTTCCGCAAGGATTGCAGACTTGGGGTTGGCCAAACTTTTGAAAAATGATGGAGCTCGGACCACCCCAATGACAATGACAATGACAAATGGAGAAAGCAAAGGATATGTAGCTCCAGAGTGGTTCAGAGGCCTCCCCATCACAGTAAAGGTGGATGTTTATAGTTTTGGGGTAGTGTTGTTGGAGACGATATGTTGTAGAAGGAGTTTGGAGGAAAAAGAAGAGGATGAAAAACAAAAGGTGTTGAGAGATTGGGGTTATGAGTGCTTGAAAGAGATGAAAGTGGAGATGTTGGTAGAGAAAGATGAAGAA…
Novel_G000551	Novel_T012014	TGTAATGTGGATGCATATTGATAATGTGAACTATACAAAGGCTTCTGTTGGTGTTGCCATCAGTGATTACCCAAACGGTCCATTCCATTATCTCCAGAGCAAAAGACCCCATGGATTTGACAGTAGAGACATGACAATCTTCAAAGATGACAATGGTACAGCCTATCTCATTTACTCATCCCAAGGCAATAGTGAGCTTCATGTAGGACCTCTCTCAGAAGATTATCTCGACGTGACCAATGTAGCAAGAAGGATTCTCATCGGCCAACATCGAGAAGCACCAGCTTTGTTCAAACATAAGGGAACTTACTATATGATCACATCAGGGTGCACGGGATGGGCTCCGAACGAGGCACTGGCACACGCAGCAGAGTCAATAATGGGTCCATGGGAGACAAT…
Novel_G000552	Novel_T012015	GGGATATGGATTGACAGAGAGTTCAGGAGGAGCAGCAAAAACTGTGGGGCCTGAAGAATGCAGTACAGCAGGTTCCGTCGGTCGCCTATCGGAAAATATGGAAGCCAAAATAGTCGATCCTTCATCTGGAGAAGCTTTACCTCCTGGTCACAAAGGAGAACTTTGGATACGAGGTCCAGGAATCATGAAAGGTTATGTTGGAGATGAAAGGGCAACTGCTGAAACCTTGCATCCTGAGGGATGGCTAAAGACTGGTGACCTTTGTTACTTTGATTCTGATGGATTACTCTACATCGTTGATAGATTAAAAGAATTGATC
Novel_G000553	Novel_T012016	TGCAATTGTCATTAATGAGTTTCTTGACGAAAGATGGAGCAAGGAAAGCACTAGCCATGAAATTAATGAACTTACAGTTGGGAAAGTGCTCATTGCTAGTAGGGGTTTTTATAAGGAAGAATATTGGTACTGGATTTGTATTGCAGCACTTTTCGGCTTTACTCTCCTCTTTAACATTCTATTTACAATAGCTCTAACTTACTTGGATCCATTGACTCATTCAAGAACTGCAATTAGCATGGATGAAGACGACAAGCAAGGGAAAAACAGTGGATCCACTACACAACATAAATTAGCA
Novel_G000554	Novel_T012017	CTGAGTTCAAATTCCCAGTCCAGTATTTATTACAATACTTTTGGAAGCAAAAATATGTAAAGATTTAGAATTTCATAAGTTTATAACTGTAACAATAATAAGTTTATAACATCGTCAAATGTATTGACGTGGACCTCTTTTTTTTTTTTTTTTTTGTTAGGATGCACTTTACCCAAATATACACAGAAATTCACCCCTTCCCTTCCACTCACTCAGCTCCCACCTGCGCCTCCTTCTCCATTCTTCAAACGATTCACAGTCCAACCACCGTCGCCGGCGTTTAAGGTCTGACCTAGAGAATCCTCCATGATAGCATTCTTTTTTCTTTTCCTTTCTTTTCTTTCTTTTTTTTTTTTATTGAGGAACTCCATGACACCAATTGAGCGCATACTATCTTAT…
Novel_G000555	Novel_T012018	TTTTAATACATATGATCCTAGTTTGTTATTGTTATTATCATATTATAATTAATTAATTAACCTATATACATTACACACATATAGGGTTTGATGGGGCAGTCATTTGTGGCTGCTATACACACATGGGGACTAAACTTGAAAGGCCCTGTTTATGTTTCTAGTTTTAGGCCATTGTCCATTGCCATTGCTGCTGCTATGGGTGCCATTCTTCTTGGTGATGATCTTCATCTTGGAAGTATAATTGGAGCAATCATAATATCAATTGGGTTTTATGGCATATTGTGGGGGAAAGCAAAAGAAGAAGAATTGAAGGGGTTAGAAGATGTTTGTGGGTTGGAATCTTCATCCAAAGCTCCATTGTTGCAATAATTATAAACTTGAAGAAGCATAATTTTGAAC…
Novel_G000556	Novel_T012019	CGCTCAGTGGCATCTCTTGCAGAGAAATATGGGCCTCTCATGCTCCTCAAACTAGGTCAAACCCCAACTCTTGTTGTCTCATCAACAAAACTAGCTAAAGAAGTAATTAAGTCCCATGATACCATCTGCTCAAACAGAGTCCAAAACACAGCTGCAAAATCCATATTCTATGGATGTCATGATGTGGCCTTTGCTTCCTATGGAGAACATTGGAGACAGGCAAGAAAATTATGTGTTTTGGAGCTCTTGAGTTCCAAAAGAGTTCAGTCTTTCCAACATGTTAGAGATGAAGAAGTTGCAAGGCTAGTGAAAAAGATTGAAAAATGTAATAAGGATAACCCATTATTGTGTGTGATCAATCTCAAGGAGCTCTTGTTGTCAACTTCAAACAATATTGTG…
Novel_G000557	Novel_T012020	CTGTTCTTGAAGGTGTTAACCTTGGAGATAGCATTGCTGTCAATGGAACTTGTCTTACTGTCACTGCTTTTGACCACCAACTATCTGAATTCAAGGTGGGGTTGGCGCCTGAGACGCTCAGGAAGACTTCATTGGTGGAACTCTCGCCTGGTTCACCTGTGAACTTGGAGAGGGCGGTTCAACCAATCAGCCGAATGGGTGGCCATTTTGTGCAGGGGCATGTGGATGGGACTGGGGAGATAATATCAATGGATCCTGAAGGGGATTCCTTGTGGATTAAGGTGAAGACATCAGAGGCTTTGCTGAATTACATTGTACCGAAGGGATTTATTGCTGTGGATGGGGCTAGCTTGACTGTGGTAGATGTTTTTGATGATGAGAAGGCTTTTAACTTCATGT…
Novel_G000558	Novel_T012021	GTGGCACTTTCGTTGGCTTGGAATGATACCAGATACGTTCATCCAATTTGCACGCCCTTCGAATGTGGAAATCTGGGCCTCATAGGATTCCCTTTTAACAATATGTCGCTGACTGATTGTGGATTTTACACAGTTAAAAACTGCTCGGGACAGCCTAAAATCCAGCTCAATCGTGGAAAAGAATTATGGTTTGATGTTACTACCATTTCTCAGGCCAATGTCATCCATATCAATGACCAAGAACTTCGGAAGCGAATAAATGCTCGCAATTGCACTATTCTCGATGATCTAGCTCTTCCAATATCTTCTTTGTCTTCTTTATCCACAGATAACAATCTTACTATGTATTATTGTACAGAAAAACCTAAAGACGCTTTACCTCTTTTCATCAGTTCATTT…
Novel_G000559	Novel_T012022	GTTGTTCTTCTCTAGGAACAACTCCGTGTTCGCAACGGGTAGAATGAAGTTCTTGCAGAAAGTAGGCTACTTTAACATTGCAGTTTATCCATTCACATCCTTCTTCATTCTTGTCGACTGCTTTTTGCCTGCGGTTACTCTGTTTTCAGGACAGTTAGTGGTCCAGTCATTTGTAATATTATTAACCTTCAATCTTGTTGATTCCATCATATTATACTTACTCGCCATTCTAGAGACCAAGTGGTCAAGCATGACGATCACCAACAGATGGCGAGAGAAGCAAGCCTTTGTAATTTGGGCGACAAGCTCCTATCTGGCTGCTGTGCTACAAGGCTTGTTGAAGTTCATAGCTGGAGTAAACATCTCATACAGATTGACACCCAAACTAGCCACAGCAAA…
Novel_G000560	Novel_T012023	ATTTAACCTGTCAACAGTATCAAATGCTACAGACAATTTTTCAAACTCCAAAAAACTTGGAGAAGGTGGCTTTGGTGCAGTATTCTGGGGTAAACTCAAAGATGGACGAGAAATTGCTGTGAAAAGGCTTTCTAACTATTCAAGACAAGGAACTAATGAATTCAAGAATGAAGTAAAACTTATAGCTAAACTTCAGCATAGGAATCTTGTAAAGCTTCTGGGTTGCTGCATCCAAGAGAGAGAGAAAATGTTGATTTATGAATACATGCCTAATAAGAGCTTGAGCTCTTTGATATTTG
Novel_G000561	Novel_T012024	TTCACTTGTACAAACAAAACATAGAAAAACTTATATGTTTTTTTAAGTTGTGTTGAGTGCTTGAGTGGTATTGAATTTCTCAGATAATGTACGAGAAAATGAAAATAGAAGTAGAAAATATTTGTGAGAAAGGTATGGACGAATTGTTGAATGTAAAAGAAGAGTGCATGGCTTTCAACCCATGGAGGACCAAATCCTTTACTCCTAAACATCATCCCGCTGTTATTCAGGTACTATTGGAGAGCAGTAAAAACAAAGACATCAGTGGAGAGGCATTACCAAATCTCATCTATGTTTCAAGACAAAAAAGTTTAACTTCTCATCACCATTTCAAGGCTGGTGCTCTTAACACTCTGGTAATCA
Novel_G000562	Novel_T012025	TCTCCAGGGAGCTGTTCATTGCTTTTAGAAGGTCAACAAATCTGAAACCGCACAGAATAATATTTTACAGAGATGGTGTAAGTGAAGGACAGTTCTCACAAGTTTTATTTTATGAGGTGGATGCAATTAGGAAGGCATGTGCCTCTCTTGAAGAGGGTTACCAGCCTCCGATTACCTTTGTTGTGGTGCAAAAGAGACATCATACCCGTCTTTTCCCTATCAGCGGTGCGGATACTGATCGGAGTGGAAACATCCTTCCAGGT
Novel_G000563	Novel_T012026	GGAACAAGTTGGGGGGGAGAGTTTCTATTTTCCACGTGAATAAAACACCAATACTTTCCTCCCAATAACACACCAAACCCTCAACAAGAAAGGAGAAACCAAAGATCAGAAAAATGGGGTGGAAGTTGTTTTACAAAGAATTGGTGCCATTCGCTGCCATGGTTGCGGCGATGTTCGCCACCGTTGGTTCCAACACCGGCTTCAAAGCCGCCACAGCTCGAGGCCTCAGCTACTATGTCTTCACCCTCTACGTTTGCATCGTCGCCGCCGCCGCCCTCATCCCTTTCGCCTTCTTCTTCCATAAGTCAGCACCGCTTCCTCCCAACAAGATTTCCTTCTTTTTCCAGATTGTTTGCCTCTCTGCACTCGGG
Novel_G000564	Novel_T012027	CTCCAATTAACACTGATTCATTCAGCCATAACTCCACAAAGCAGCACAGAGTTCATAAAAAGCTCTTGCAGTTCCACCACTTACCCTCGTCTCTGTTTTTCATCTCTTTCAGTCCATGCCAATGCCATCCAAACAAGTCCCCGCCTTTTGGCCACCGCCGCCCTCTCCGTTTCCCTCTCCTCCGTCAAGTCCACCGCCACTCAAATCCTCAAGCTTTCTCACTCCCATGGCCTCCCCTCCAGAGATGTTTCTGCTCTTAACGACTGTTTGGAAGAACTGAGTGACTCTGTCGACTCCCTCGCTGCTTCCATTTCCGAGATGCCGAAGCTCCGTGGAACCAATTTCGACCTCGCAATGAGTAATGTTCAGACATGGGTTAGCGCCGCTCTGACGGATGAA…
Novel_G000565	Novel_T012028	TTTTTATTCCAGTTACACAGTTGTTGGAAGGTCATTTTTCTCGCATGAACTGGGGCAGCCAGGTGAACTTGGTAATGGTGTTGAGTATTGGAGGGGATATTACCAAAGTCTACGACCTGTACAAATGGGTTTATCTTTAAATATAGATGTGTCAGCTAGATCATTTTATGAACCAATCAGTGTGACAGAATATGTTGTTAAACACTTCAACCTAAGGATTCTCTCAAAGCCAATGTCTGATCAGGATTGTCGCAAGGTTATTCAAACTGTCATTAATATATGCACATGTCATGTTTATGGGTTTTGAAGTGCAGAAATTTTTTATCCTGAGAATTGTAGTATTT
Novel_G000566	Novel_T012029	TTAATATTATTACTTTTACTAGCTACACACCAATTAGTTCTCTTTTTTTCTTTTTTTTTCAATATTTTGTAGATTATTAAGGATTTTTTAAAGCCTATCTATACTCCTGAAGACTTAAAGGCAGATCCCCAACCTGTAACTCTGCTCTTTGAAGATTGCCAGAAAAAAGGGAAGCAGGTTCATATTGAGAATCAGGAAAAGGGTTCCACGTACGTCGCGAAAGTCTATGTTGACTGTAGGCCTGTTGCTTCTGGCTTTTCGAAGCAAAAACCAATCGCAAGGCTTAATGCTGCCCGAGAAGCTCTTATCATACTGTCGGATTCTACGGATACCAAAATTAAAAGGGTTGTAACTATTGATGGTATTGATGGTTCGTTTGAAATTGAAGGGGCAAAGCAG…
Novel_G000567	Novel_T012030	CTGCAAAGCGACAGAAGTTGCAACATGCACAGCATGGACGTCTTCCGCCTATTCAGCAGTCAGGGCAAGCTCATGCACAGATGCGACCGGTAGCTAACCAGCCTATTCATGGGTCTCAACCTCCAATTGCTGCAGGGCCTAGCCATCATTTTGGGGGGAAGCCTCGTGGACCCCCAGGTCCTGGTAGGTATCCCTCAGGTGGAAATCCTCCTGGATACAACCACCCAAGTCGTGGTAGTCAAGGTGGGGGTGGTTATAGCAACACGCAATATGCTCAAGGACGAGGTGCACCCTATGGATCTGGTAACATGTCCAGTGCTGGTCCTCGAGGTGGAGCTGGAGGTGGTGGTTATGGTGTGGGAGCTTCAAGTTACTCACAGAATGGTCCATATGCTGGTA…
Novel_G000568	Novel_T012031	CTTGTCTTGAATCTCTGATCTTTGATTGTGTAGAGTTTCCCATTAATTTTGAGGCACTGCAGAGGTTGGTGAGTAGATCCCCATCGTTGAAGAAACTTGGGGTGAATCGTTATGTTTCCATTGCTCAGCTATACCATTTAATGATTTGGGCTCCACGTTTAACGCATCTGGGAACTGGTTCATTTAGTACTTCAGAGGCTGTGGTTCATGGGGACTCAGAGCCTGATTTTGCCTCTGCTTTTGCTGCTTGCAAATCCTTAGTTTGTCTTTCTGGATTCAAGGACATTTTACCTGATTACCTACCTTGTATCTATCCAGTTTGTGCTAATCTCACCACTCTGAACTTGAGCTTTGCAAATATAACTCCTGAACAACTCAAACCAGTCATAAGTCACTGCC…
Novel_G000569	Novel_T012032	TTTATTTCAGGCTATGGACAGACAGCCAATGAAATTATTCAAAGTGCTTTATTTCCTGAAGATGGACTGCATAATGGTGTTGGTCAGGCTGGAGGTGCAGGTGGGATTGTGATTGTTCGAGATATCGACTTCTTCTCATATTGTGAGTCATGTCTGCTTCCATTTCAAGTGAAATGTCATGTGGGCTATGTTCCATCTGGTCAACGAGTTGTAGGGCTCAGCAAGCTCTCTCGAGTGGCAGATGTGTTTGCAAAGCGACTTCAAAAGCCTCAGCGTCTAGCTGATCAGATTTGTTCAGCTCTGCAACATGGGATCAAGCCAGGAGGTGTTGCTGTTGTTATT
Novel_G000570	Novel_T012033	TGAGAGTATTCTAGGGAAGCTACAGAGGGTGGAGCCATACGTGACATATGGATACCCTAATCTGAAAAATGTGAGGGAGCTCGTATATAAGAAGGGATTCGCAAAGATAGACAAACAAAGAGTTCCTCTGACTGATAACAACATTATTGAACAGGCATTGGGGAAACATGGTATCGTGTGCATGGAAGATATGGTGCATGAAATCGC
Novel_G000571	Novel_T012034	AAATTTTCTCCCACCCTGGTTTCACGAGTTCAGTTCTTTGATATTCACTTGTTGGTTTATAGGATAAAGATGCTGCCTTTGTTGAGAATCAACAGCATAACATTGATGATGTCATCGATCGGCTGCCACGTTTAGCAATAGGGATAAATGTAAATATTAAGTTTAGAAGGTAGTAGCTACTTAGTCCTTTTATCTTCGCCGGCCTTTTTTAAACTACGTTTAATGTTGTATTTGCAGAATTGATGATTTTAAATTCACTCCAGAATGTGCGATTTTTTATTTGCTGAACATTCGTCTATATCATGGTCGGATAGTTGACCCACAGGTTCTTATATACTTTCTTTCTTCT
Novel_G000572	Novel_T012035	TGGTGAGCATGAGAAACCTGATTTCGACAAAGAGGATGAGTTGCTTGGATTGCCAAAAGGGTGGACCTCCTCTGAGTCAGGTGATGGCTTCTTTGCAGCTAGGCAAAGGAGTTTAAGCCATAAAATTGATAATGATATGAGCAATGAAGATAATGAAGAAGATGAAGAAAAAGGCAATGAGGATGAAAAGGGCTCAAGAAAGAGGAAGCGTAAATTATCTCTGTACCAAAAAGCTAAGGAAGCCATGATGGAGGAGTATTATAAATTAGATTACGAGGATACAGTTGGAGACTTGAAGACGAGGTTTAAGTACGCCAAAATACAACCTAATCGTTATGGATTGAGTACT
Novel_G000573	Novel_T012036	ATTTTCCATACTAAGAAGCAAGACAAATTTGGAGTCAAGTTCACTACAAAGTATGTCAACATTCCAAGAGACGAAGTTGATGCATGGGAAATTGATGTGAGCCTGCTAGTATTTGAGAAGAAAATTGCGTCTGGATCTCTTAGTGACTTGTATAAAGGCACCTTCTATGGTCAAGATGTTGCTATTAAGCTTTTAAAAAATGAAAACTTGAATGAGACTGTCCGGCGGGAATTTGTTCAAGAAATTCAT
Novel_G000574	Novel_T012037	GTTTATTTGCAGGTATAAAAAACTTTTATCAAGTGGATTTGACAAAAGATTTTTTCTATAGCTATACCTATCCAATAATGCAAAGTTTGCAAAAGAATGCCATGTCAACTGCTGCAGAAGGAATGCCATACGATAACATTTTTGTTTGGAATGCTTATTTGACTCGAGCTATTCGATCACGATGCAATAACACTGCATGGACCATAGCATTAGTTCACGGACATTTCAAGCAGGTATGCAAATGCTGCTCCTTGCTCTTAACATCTTTTGGGTGTTGTGCAGTTTCATTATCTTTAAGGTTGTTAGTTCGAAG
Novel_G000575	Novel_T012038	ATTAGATCTCCATCAGGATGGCGTACAATAACATCCCTACTATCCATTACAGCTCGACATCCAGAGGCTTCTGAGGCAGGATTTGATGCTCTACTCTTCATTGTGTCCGACGGTGCTCACTTGTTGCCAGCAAATTATACCCTCTGTATTGATGCCTCAAGGCAATTTGCTGAGTCTCGTGTTGGACAGGCGGAACGCTCTTTGCGTGCATTGGATCTTATGGCTGGATCTGTTGATTGTTTAGGACGGTGGGCTAAGGAGGGTAAGGAAGCTGCAAGGGAGGAGGAAGCCATTAAAATGTCACAAGATATTGGAGACATGTGGCTG
Novel_G000576	Novel_T012039	CATACTTGCAGGTGTTTGGTAAGAGCACACTAATTGGATTGTGCTTAACTTTCTTTTCTGCTGTTTCCATTTCTCTCTTCTCACCAGCATTCAATTTGGCCACAAACGATCAATGGCACACTCTAGATGATGATGTCCCACATTTGACCGTCTATACCGCATTTTTCTACCTTTCGGTCTCTTGTTTTTTCATAGCTGTCATTCTCAATGTTGTCTTCCTTTACCACCCTATGCTTAATTTGCCCAAGTCAACAATAAAGGCATATCTGAAGGACTGGAATGGTAGAGGATGGGCC
Novel_G000577	Novel_T012040	ATTCCCTCCAGGGCCAAAAGGGTTTCCCATTTTTGGTTGCCTTCATTTACTAGGAAAACTCCCTCACAGAAATCTCCACGAATTATCCCAAAAGTATGGACCCATAATGAGCATGAAACTAGGGCTTGTTCCCACCATCATAGTCTCATCCCCTCACGCCGCCCAACTCTTCCTCAAAACCCACGACCTCATTTTTGCAAGCCGCCCCTCTTCACAAGCTTCAAAACACATCTCTTATCAACAAAAAAATTTAGTCTTTGCTCCATATGGTCCTTATTGGCGCAA
Novel_G000578	Novel_T012041	TTTGGCTAATTATATTGATCAATTATTACTATCTTAACAGGGGAGGAAGATATGGATAGGATTCTAGATAACGTTCCCGGTATGGAGAATCTTCTCCGACGCAGAGATCTTCCTGGTTTTTGCAGAGCCACTGACCCAAACAATGACCCAATTCTTCAATTCATTATGAGTACGTTTATTCGAAGCACCAAATTCAGTGCCCTCATAATGAACACATTCGAGGATTTGGAAGGACCCATTCTCTCTAACATTCGAACTTTGTGCCCAAATCTCTACTCAATCGGACCTCTTCATGCCCTTCTCAAAACCAAA
Novel_G000579	Novel_T012042	CCGCCTCGAGTTCATCGGAGATTCAGCTATTGGCCTCGCTATTTCCACTTACTTTTTTCCCCTTTATCCGGACCTCAATCAAGGCCAACTCACTTTACTTAGAGCTGCTAACGTTAGCACCGAGAAGCTTGCTCGTGTTGCAGTCCTCCATAGATTGTATAGTTATGTTAGACGCAACGCAGACGATCTTGATGATAATGTTAGAGAGTTTGCCGATGCCGTCGCTCTAGAAGACAACTCAATTCCCTATGGTGGATTGGTGAAGGCTCCTAAAGTTCTTGCTG
Novel_G000580	Novel_T012043	TGATCTTATGTACTTCCCCACTAGGAATGCTTATGGACTTTCGAGCGTTGCTGGAAACCATGAGAAATTACCCGCCTTGCAGGATGAATTTGAGTATGTCAAAAAGAAAATGGATGAGGATACTGAGAAAGCTGTCCGGTTAGAGAAGAAGGTTAAAGTTCTCACACATGGCTATGAGACACGGGCAAAACAAAGCCTTTGGCCACAAATTGAGGCAACCTTCAAGCAGATAGACACTGCAGCTACAGAGCTTGAGTGCTTTGAAGCTCTTCAAAAG
Novel_G000581	Novel_T012044	GCCCCAACCTGTAACTGTACTCTTTCAAGTTTGCCAAAGAAATGGAAAGCAGGTTGATATTAAGCATTGGAAAAACGGATCCAATAGCATCGCGAGTGTCCATGTTGATGGTAAATTTGTTGCTTCCGGCTCTTCAATGCAAAAAGAAATCGCAAGGCTCAATGCTGCCAGAGAAGCTCTCATCAAATTGTCGGATTCTATGGATACCAGAATTAAAACATTTGTAACTATTGATGGTATCGATGAATCGTTTGAGATTGAAGGGGCAAAG
Novel_G000582	Novel_T012045	ATTCTTGTAAACACTGCTCTATCCATTTCCATGTTCAAATGCATTGTTCGTTTAATCCTTCACATGGTAGGAATCCGTCTCTCATGGCCATCAACTGTAGTCCCATCACCAGATTCCTTTGAAAGCTCCTCAGAGTTGGGAGATCCCAATTGTGGCTCCTCTTGGAATTACCTTGAGATGTTTCGACACCGATGTCCAAGGATTAGATTCGATAAAGTACCGAGTTCAGAACGTCGTGAACATGACTGCTCGGTC
Novel_G000583	Novel_T012046	GCGATTGTTACAATTGTGTGAGTAAAATCCCTCAAATCGTTCAGTCCTTGTGTGGGAAAACCATAGCTGCAAGAGTTCAACTCTATGGCTGCTATTTGTTGTATGAGGTTTCTGGGTTTGCTCAAATTTCAGGGTTTGAAATGCTGTATAAAACTTGTGGCTCTACGAATGTTGCTGGAAGTGGGTTTGAAGAGCGTCGAGATACTGCTCTGTCTGTTTTGGAGAATGGTGT
Novel_G000584	Novel_T012047	CCGCTGTTGGTTCTGGATTGGCTTCTATCGTTCTCTTTGAAGCAAATATTTTAGCTGTCTTATCTGAGATTTTGTCAGCTATTTTTGCTGAAGTTATGCAAGGAAAGCCTGAATTTACTGACCATTTAACCCATAAGTTGAAGCATCATCCTGGACAGATTGAAGCAGCTGCAATCATGGAATACATTTTAGATGGGAGTTCTTACATGAAAACGGCCAAGAAGTTGCATGAAATGGAT
Novel_G000585	Novel_T012048	TGCAGGCATTTACTGGGAAATGCTGTCTCCTGAGAAGCTGAGCCAAATTCGAATACTCAGGGAGCTCAAACGTCGGATCGAGCGGGAGACCGGAAAACTGCTGCCATGTGGTCCGTCGGAGAAACTTCCACCTACAGCTCAACGAACCTCGAAACCTGGAAAACGTGCATTGTCTAAGAAGTGAACAAGGGGAAAGTGGAGAAAGAAA
Novel_G000586	Novel_T012049	AGGACTTCTAAATGATAAGAAACTGGCAACGTTGGTCGATCCCGATCTCGGAGGTAATTATGCAGAAGAAGAACTAGAGCAGGTAATTCAAATTGCTGTTCTTTGCACGCAAAGCTCCCCGGTGGAACGACCAAAAATGTCGGAGGTGATGCAAATGCTGGAAGGCAATGGTTTAGCTGAGAGATGGGAGGACTGGCAGAAAGAAGAGAG
Novel_G000587	Novel_T012050	GCAGCGTCGGAAAGAAATGAACAAGAAGTTTGAAATATATGATAAGCAGGTTAAAGCAGCTAAGAGGTCTGGAAGCAGGGCGCAACAAGAGAAGGTGAAAGACCGAGCAAAATTTGCTGCTGCTAAGGAAGCCTCAAAGAACAAGTCCAAGGGAAAGGTTGATGAGGATGAGCCCCTGCCAGAGGCCCCTAGAAAGTGGAGAGACTACAGTGTAGAATTCCATTTCCC
Novel_G000588	Novel_T012051	GAAGAATGGAAGATGCCAAATAGTACTAGACAGCGCCTGAAAATGAGGTCTAGGGAGCTCCTTAGAGGCAAACAATCTAGTGAACAGAAAGATATTGGGAAGAGAAGGGCGAAAAATTGCTCCAACGTGCACATTTTGGATGACAATGAGAATGACAAAGTAAATAATGCTGACAAGGGCAATATATCTCGGAAAGCCAGGAGAAAACAACGTCAAGCTGAGCTTAAAT
Novel_G000589	Novel_T012052	TTATGCTGGAATTGGTTGGGTGATCTGGAGAACCAAAGAAGATTTGCCTGAAGAACTCATTTTCCACATCAATTACCTTGGAGCGGATCAACCCACTTTCACTCTCAACTTCTCCAAAGGTAAAATTCAGTTCCTAATTGTTATTAATCAAAACTTAATGAGAATTTGAGATGAAATCAGGCTGACGTTTGAATGATGAAAAAAATAACAGGA
Novel_G000590	Novel_T012053	TTTTTACACGGCTGTGGAAATTGCTAAACAGGCCAAAGCTGCCAATGCGAAATTGATAGTGACAATGGCTTGTTTTTACGATCGGGTTAAGGATTTGGCTGAAAACGGTGTTCAAGTTGTTTGTGTTGATTTTGCTGTAGAGGGTTGTTTGCATTTTTCTGTTTTGAGTGGGGCTGATGAATCTCTTGCGCCGTTGGTGGATTTTTCCTCTAATGACGTGGTG
Novel_G000591	Novel_T012054	AAGGAAAACAGCTGAAGCCATCGATATTCTTAAACTCATGTCTTCCACATTCTTAGTTGCTTTATGTCAAGCAATTGACTTGAGGCATTTGGAGGAAAACTTGAAGAGCGTGGTGAAAAGCACAGTTAGCCAAGTAGCAAAAAAAGTGTTGACTACCTCTTCCAATGGCGCACTTCATCCTTCAAGATTTTGTGAGAAAGATTTACTCAAAGTTG
Novel_G000592	Novel_T012055	TGCAACCCAAAAAGGGTTGCTTTTTGTGGTGATGTGCCGATCAACCTTCTTGACGCGTTGAATCAAATCAAAAGATGGAGTATTGGGTTTTTGGAAGTCGATTTTTCAAAGTACAACCCAATCACATATGGTGTAAGGTCCATGGGGCTTCTCATGGGGCTTTGTTACGCCCATTCTGCATTTTGGCCAGCTTGGTGCATTCCGGTCACTGTC
